# Supplementary material for: Esr1-dependent signaling and transcriptional maturation in the medial preoptic area of the hypothalamus shape the development of mating behavior during adolescence
Source: eLife. 2026 Jun 19;14:RP106347. doi: 10.7554/eLife.106347 (PMC13282117; doi:10.7554/eLife.106347)
Supplement: Supplementary file 1. [file elife-106347-supp1.xlsx]

## Sheet: library sample quality
sample	# of mice used	reads	actual_cells	read_cell	Q30 bases in UMI	Reads mapped confidently to Genome	Median UMI/cell (neuron)	Median gene/cell (neuron)	depth (neuron)	Inclusion/exclusion
P50M	4	228920607	6224	36780.3	0.95	0.866	6251	2816	2.21942	Include
P35M	4	219375189	8440	25992.3	0.953	0.86	5937	2778	2.13694	Include
P23M	4	380214673	7515	50594.1	0.961	0.924	4897	2532	1.93404	Include
Cast	4	227954537	8384	27189.2	0.951	0.85	5233	2501	2.09236	Include
P50F_1	4	254338297	3921	64865.7	0.941	0.841	1826	1076	1.69703	Exclude, median UMI for neurons<2500
P50F_2	4	226893158	6050	37503	0.945	0.848	5273	2521	2.09163	Include
P35F	3	225657406	8321	27119	0.953	0.858	6144	2756	2.22932	Include
P23F	4	247964839	6992	35464.1	0.934	0.811	4694	2342	2.00427	Include
OVX	4	229811086	6995	32853.6	0.952	0.849	4824	2342	2.05955	Include
Esr1KOM	4	397005789	6464	61418	0.963	0.909	3240	1845	1.7561	Include
Esr1KOF	3	449348949	6727	66797.8	0.973	0.926	3318	1861	1.78243	Include
