# Supplementary material for: Esr1-dependent signaling and transcriptional maturation in the medial preoptic area of the hypothalamus shape the development of mating behavior during adolescence
Source: eLife. 2026 Jun 19;14:RP106347. doi: 10.7554/eLife.106347 (PMC13282117; doi:10.7554/eLife.106347)
Supplement: Supplementary file 2. [file elife-106347-supp2.xlsx]

## Sheet: Vgat1
	P23F_p_val	P23F_avg_logFC	P23F_pct.1	P23F_pct.2	P23F_p_val_adj	AF_p_val	AF_avg_logFC	AF_pct.1	AF_pct.2	AF_p_val_adj	P35F_p_val	P35F_avg_logFC	P35F_pct.1	P35F_pct.2	P35F_p_val_adj	Cast_p_val	Cast_avg_logFC	Cast_pct.1	Cast_pct.2	Cast_p_val_adj	OVX_p_val	OVX_avg_logFC	OVX_pct.1	OVX_pct.2	OVX_p_val_adj	AM_p_val	AM_avg_logFC	AM_pct.1	AM_pct.2	AM_p_val_adj	P35M_p_val	P35M_avg_logFC	P35M_pct.1	P35M_pct.2	P35M_p_val_adj	P23M_p_val	P23M_avg_logFC	P23M_pct.1	P23M_pct.2	P23M_p_val_adj	max_pval	minimump_p_val
Ntng1	5.61566e-18	1.26885	0.602	0.319	1.14251e-13	2.06175e-58	1.52215	0.777	0.295	4.19463e-54	1.65847e-22	1.11913	0.637	0.334	3.37416e-18	7.81012e-28	1.46291	0.583	0.276	1.58897e-23	7.79652e-37	1.46239	0.594	0.293	1.5862e-32	2.19988e-26	1.32599	0.588	0.24	4.47566e-22	4.45247e-38	1.2886	0.659	0.293	9.05854e-34	2.01994e-45	1.46545	0.581	0.224	4.10956e-41	5.61566e-18	1.6494e-57
Gal	3.31663e-08	1.53946	0.311	0.143	0.000674768	1.39989e-29	1.68136	0.452	0.15	2.84808e-25	2.38982e-10	1.45523	0.363	0.184	4.86209e-06	7.32407e-27	1.76801	0.378	0.116	1.49008e-22	6.94954e-06	0.832364	0.21	0.121	0.141388	4.05558e-21	1.28017	0.471	0.178	8.25107e-17	1.46917e-24	1.46953	0.451	0.174	2.98903e-20	1.30012e-27	1.62319	0.33	0.101	2.64509e-23	6.94954e-06	1.11991e-28
Oprk1	0.212374	0.644319	0.204	0.187	1	1.10851e-07	0.863854	0.325	0.199	0.00225527	3.40948e-10	0.89757	0.43	0.25	6.93658e-06	3.60496e-07	0.896278	0.321	0.198	0.0073343	2.26723e-06	0.765063	0.301	0.21	0.0461268	3.79663e-08	0.976496	0.37	0.207	0.000772425	4.02639e-06	0.708774	0.317	0.212	0.0819169	2.99592e-24	1.25859	0.361	0.135	6.0952e-20	0.212374	2.39674e-23
Ogt	0.000122481	0.5923	0.68	0.846	1	4.18333e-22	0.658146	0.873	0.874	8.51099e-18	1.24406e-17	0.619707	0.852	0.866	2.53105e-13	1.69146e-13	0.532621	0.795	0.846	3.44127e-09	4.12574e-21	0.641252	0.799	0.821	8.39382e-17	5.78362e-28	0.922264	0.933	0.872	1.17668e-23	9.69508e-27	0.777522	0.878	0.865	1.97246e-22	1.69339e-14	0.586779	0.759	0.822	3.44521e-10	0.000122481	4.6269e-27
Nts	0.0973051	0.73852	0.165	0.121	1	8.14733e-09	0.977236	0.313	0.167	0.000165757	6.92214e-13	1.12696	0.363	0.156	1.40831e-08	0.00972871	0.697589	0.173	0.116	1	0.0578377	0.462465	0.137	0.103	1	3.65211e-10	0.904862	0.319	0.133	7.43022e-06	1.57564e-20	1.42133	0.396	0.156	3.20564e-16	1.67728e-13	0.881588	0.277	0.115	3.41244e-09	0.0973051	1.26051e-19
Tmem35a	0.39108	0.547367	0.184	0.18	1	3.69211e-13	0.943713	0.392	0.208	7.51159e-09	4.19434e-09	0.86388	0.378	0.212	8.53338e-05	0.00319984	0.658115	0.237	0.175	1	0.716357	0.254752	0.142	0.169	1	2.68688e-08	0.821264	0.395	0.237	0.000546645	1.16346e-18	1.14839	0.463	0.234	2.36705e-14	0.000188561	0.771241	0.283	0.217	1	0.716357	9.30765e-18
Lingo2	0.550367	0.309724	0.252	0.354	1	0.00662614	0.421699	0.476	0.508	1	0.000306114	0.419313	0.474	0.421	1	6.74536e-06	0.624247	0.494	0.445	0.137234	0.106328	0.50525	0.374	0.422	1	1.83285e-09	0.820019	0.63	0.513	3.72893e-05	1.44646e-06	0.590092	0.53	0.468	0.0294283	0.000384584	0.628818	0.445	0.449	1	0.550367	1.46628e-08
Fstl5	1.70181e-08	0.9327	0.505	0.37	0.000346233	4.7271e-14	0.942492	0.554	0.403	9.61729e-10	3.60525e-05	0.579304	0.474	0.402	0.733489	0.030603	0.588351	0.365	0.377	1	1.06388e-05	0.701295	0.406	0.364	0.216446	5.25237e-09	0.806248	0.521	0.398	0.00010686	1.02317e-15	0.972754	0.585	0.431	2.08163e-11	2.78515e-05	0.658706	0.419	0.381	0.566639	0.030603	8.18534e-15
Pcdh7	3.69543e-05	0.663722	0.515	0.475	0.751835	3.22076e-08	0.7096	0.554	0.473	0.000655263	7.96261e-09	0.660434	0.63	0.546	0.000161999	6.2479e-05	0.588088	0.519	0.511	1	0.471235	0.390258	0.402	0.493	1	7.72858e-09	0.760552	0.588	0.477	0.000157238	1.43566e-12	0.74386	0.634	0.544	2.92085e-08	1.50894e-14	0.838914	0.602	0.488	3.06993e-10	0.471235	1.20715e-13
Slc18a2	9.37548e-19	1.64844	0.408	0.136	1.90744e-14	4.98165e-38	1.4845	0.47	0.14	1.01352e-33	4.31683e-26	1.34977	0.437	0.143	8.78258e-22	3.89509e-16	1.08904	0.288	0.102	7.92457e-12	6.01058e-41	1.473	0.388	0.11	1.22285e-36	8.95925e-06	0.759368	0.176	0.076	0.182276	1.29368e-08	0.800929	0.22	0.097	0.000263199	2.09208e-23	1.26126	0.267	0.077	4.25634e-19	8.95925e-06	4.80846e-40
Sez6l	1.22549e-07	0.838852	0.573	0.535	0.00249327	5.64101e-16	0.784639	0.675	0.58	1.14766e-11	1.58296e-22	0.827328	0.793	0.633	3.22054e-18	0.00060436	0.529682	0.5	0.534	1	5.35329e-05	0.543351	0.489	0.518	1	6.01011e-15	0.753175	0.706	0.582	1.22276e-10	4.11403e-18	0.787003	0.713	0.625	8.37e-14	1.84496e-08	0.667064	0.56	0.545	0.000375358	0.00060436	1.26637e-21
Ecel1	0.116652	0.532797	0.282	0.261	1	9.96521e-10	0.777204	0.41	0.252	2.02742e-05	4.01032e-09	0.71296	0.467	0.297	8.159e-05	0.000142677	0.777821	0.327	0.248	1	0.00658515	0.513899	0.265	0.221	1	8.15462e-07	0.740667	0.454	0.317	0.0165906	3.74754e-36	1.11085	0.646	0.294	7.62438e-32	5.62284e-20	1.10795	0.503	0.296	1.14397e-15	0.116652	2.99804e-35
mt-Atp6	2.97882e-47	0.914677	1	1	6.0604e-43	1.64771e-47	0.696611	1	0.998	3.35226e-43	5.27473e-44	0.732963	1	0.997	1.07314e-39	2.0431e-56	0.858365	1	0.998	4.15668e-52	5.54654e-59	0.689589	1	0.998	1.12844e-54	3.95799e-31	0.688172	1	0.991	8.05253e-27	1.16449e-59	0.783566	1	0.998	2.36915e-55	1.08527e-22	0.408066	0.995	0.999	2.20798e-18	1.08527e-22	9.31589e-59
Gm26699	0.000126832	0.750972	0.35	0.239	1	8.61861e-15	0.712413	0.717	0.616	1.75346e-10	0.000135952	0.553657	0.511	0.449	1	1.4099e-05	0.594919	0.564	0.555	0.286845	1.98397e-09	0.619236	0.553	0.49	4.0364e-05	1.09433e-08	0.680655	0.605	0.484	0.000222642	2.40524e-07	0.552748	0.561	0.489	0.00489347	0.000163451	0.622233	0.393	0.341	1	0.000163451	6.89489e-14
Nrxn3	2.25029e-11	0.567771	0.835	0.807	4.57822e-07	6.50705e-19	0.524203	0.904	0.807	1.32386e-14	4.5253e-31	0.628834	0.978	0.815	9.20673e-27	5.43116e-19	0.547602	0.891	0.807	1.10497e-14	1.69368e-20	0.501664	0.881	0.792	3.4458e-16	4.98249e-23	0.673329	0.916	0.787	1.01369e-18	1.28604e-33	0.719197	0.945	0.805	2.61645e-29	6.15216e-28	0.625949	0.911	0.827	1.25166e-23	2.25029e-11	1.02883e-32
Igf2bp3	0.0305181	0.588803	0.505	0.624	1	5.40722e-06	0.426994	0.663	0.734	0.11001	0.00300686	0.278346	0.644	0.703	1	0.030337	0.39481	0.551	0.696	1	0.0303302	0.425036	0.511	0.648	1	1.00141e-17	0.660546	0.832	0.697	2.03737e-13	0.000158999	0.320404	0.652	0.698	1	0.999921	0.268455	0.414	0.572	1	0.999921	8.01128e-17
Scg2	1.37632e-20	0.905932	0.883	0.826	2.80013e-16	9.2659e-48	1.09824	0.964	0.824	1.88515e-43	1.63547e-33	1.01852	0.97	0.855	3.32736e-29	2.36233e-35	1.00947	0.885	0.771	4.80615e-31	5.29006e-45	0.984118	0.895	0.771	1.07626e-40	1.92292e-10	0.658034	0.798	0.79	3.91219e-06	1.37161e-47	0.969233	0.957	0.838	2.79053e-43	2.06558e-48	1.0438	0.916	0.828	4.20243e-44	1.92292e-10	1.65247e-47
Tmem243	0.0296393	0.647673	0.359	0.346	1	9.04982e-09	0.667941	0.524	0.407	0.000184119	0.00415968	0.389451	0.4	0.346	1	4.36309e-06	0.581439	0.494	0.423	0.0887671	2.10201e-08	0.602476	0.475	0.375	0.000427653	4.55077e-09	0.657977	0.504	0.33	9.25854e-05	0.0545718	0.320336	0.39	0.389	1	0.00578994	0.512388	0.319	0.286	1	0.0545718	3.64062e-08
Rbm4b	0.000218916	0.732573	0.544	0.584	1	2.45325e-07	0.457273	0.705	0.747	0.00499115	8.45084e-07	0.444396	0.704	0.714	0.0171932	8.39073e-07	0.509962	0.654	0.707	0.0170709	6.76219e-13	0.624565	0.671	0.671	1.37577e-08	2.00109e-10	0.63687	0.756	0.704	4.07122e-06	7.42399e-11	0.513332	0.756	0.734	1.51041e-06	6.61392e-11	0.617552	0.696	0.725	1.3456e-06	0.000218916	5.40975e-12
Lrfn5	1.10687e-06	0.757839	0.592	0.576	0.0225194	3.79292e-09	0.593149	0.657	0.648	7.7167e-05	4.11693e-11	0.545639	0.733	0.635	8.37588e-07	0.0399133	0.449503	0.506	0.626	1	0.00124457	0.476551	0.53	0.607	1	1.52022e-10	0.63493	0.731	0.645	3.09289e-06	2.02732e-19	0.673106	0.75	0.662	4.12457e-15	5.03269e-08	0.62202	0.581	0.614	0.0010239	0.0399133	1.62185e-18
Olfm3	0.000138412	0.925418	0.34	0.243	1	2.89017e-18	0.99118	0.494	0.271	5.88005e-14	1.86866e-17	0.972671	0.526	0.284	3.8018e-13	1.33082e-06	0.817221	0.333	0.22	0.0270755	0.0980048	0.393349	0.233	0.219	1	6.99541e-05	0.630084	0.336	0.236	1	2.18796e-13	0.893843	0.476	0.298	4.45141e-09	9.24336e-12	0.861076	0.429	0.278	1.88056e-07	0.0980048	2.31213e-17
Prlr	0.196986	0.489746	0.408	0.476	1	0.00152867	0.440218	0.542	0.52	1	1.62695e-05	0.579241	0.585	0.529	0.331003	0.000394176	0.621719	0.494	0.494	1	0.452115	0.407005	0.393	0.478	1	9.22128e-07	0.629418	0.597	0.514	0.0187607	2.98915e-14	0.627621	0.695	0.565	6.08142e-10	0.0413082	0.336358	0.419	0.444	1	0.452115	2.39132e-13
Kdelr2	0.888266	0.514861	0.175	0.197	1	0.166226	0.412132	0.313	0.32	1	0.0254844	0.311178	0.333	0.296	1	0.0032504	0.529766	0.314	0.256	1	0.31092	0.347036	0.21	0.281	1	1.13806e-05	0.625737	0.429	0.319	0.231538	0.00652056	0.47585	0.36	0.324	1	0.748911	0.339102	0.288	0.343	1	0.888266	9.1041e-05
Efna5	0.0210431	0.253289	0.243	0.462	1	2.46218e-07	0.613048	0.554	0.513	0.00500931	0.393082	0.34348	0.437	0.532	1	0.000849466	0.594948	0.474	0.497	1	0.0199818	0.532678	0.411	0.46	1	7.87984e-06	0.624443	0.58	0.531	0.160315	8.70957e-06	0.462508	0.555	0.525	0.177196	0.0017221	0.548921	0.461	0.493	1	0.393082	1.96974e-06
mt-Co3	1.15533e-45	0.88235	1	1	2.35051e-41	1.90601e-42	0.597119	1	0.995	3.87778e-38	3.26489e-41	0.676763	1	0.996	6.64242e-37	1.97874e-54	0.78975	1	0.997	4.02575e-50	3.33126e-58	0.640037	1	0.998	6.77746e-54	3.32345e-29	0.619995	1	0.989	6.76156e-25	2.04828e-57	0.72637	1	0.998	4.16722e-53	3.30031e-21	0.354389	1	1	6.71448e-17	3.30031e-21	2.66501e-57
mt-Nd1	4.30501e-41	0.769718	1	0.998	8.75854e-37	9.07079e-35	0.540151	1	0.991	1.84545e-30	4.27571e-35	0.608868	1	0.994	8.69893e-31	1.16126e-44	0.686531	1	0.995	2.36259e-40	1.40578e-50	0.607649	0.995	0.997	2.86006e-46	2.93424e-29	0.618108	0.992	0.985	5.96972e-25	9.25914e-53	0.656915	1	0.996	1.88377e-48	7.77271e-08	0.27361	1	0.998	0.00158136	7.77271e-08	7.40731e-52
mt-Nd4	3.82198e-40	0.784468	1	0.996	7.77583e-36	7.35209e-35	0.544886	1	0.989	1.49578e-30	9.65248e-40	0.650377	1	0.988	1.9638e-35	7.19316e-51	0.733397	1	0.992	1.46345e-46	2.12527e-50	0.615517	1	0.993	4.32386e-46	2.07601e-26	0.60998	0.975	0.973	4.22364e-22	1.31994e-53	0.664283	1	0.992	2.68542e-49	4.78385e-09	0.266974	0.969	0.992	9.73274e-05	4.78385e-09	1.05595e-52
Cacna1e	0.683494	0.404044	0.33	0.424	1	0.36592	0.355143	0.392	0.487	1	0.108219	0.372034	0.43	0.485	1	0.824628	0.313595	0.346	0.442	1	0.329894	0.366284	0.361	0.439	1	1.64223e-06	0.607717	0.546	0.495	0.0334112	0.447015	0.263292	0.415	0.503	1	0.619523	0.319375	0.351	0.438	1	0.824628	1.31378e-05
Spock1	0.000697964	0.811015	0.515	0.546	1	5.3439e-06	0.727253	0.554	0.538	0.108722	1.05731e-13	0.900699	0.681	0.574	2.15109e-09	0.0763912	0.639337	0.417	0.487	1	8.7402e-13	0.770485	0.598	0.527	1.77819e-08	0.0239317	0.605555	0.479	0.539	1	6.72759e-05	0.798331	0.543	0.569	1	0.821661	0.351081	0.461	0.625	1	0.821661	8.45846e-13
Gabrq	0.501835	0.496832	0.32	0.384	1	0.00133056	0.594876	0.404	0.381	1	9.26644e-08	0.7148	0.548	0.463	0.00188526	0.00359835	0.573416	0.41	0.4	1	0.510375	0.424384	0.311	0.36	1	3.87788e-05	0.601972	0.479	0.408	0.788954	8.37283e-11	0.656723	0.561	0.448	1.70345e-06	0.0027679	0.633387	0.393	0.388	1	0.510375	6.69826e-10
Zmym1	4.86198e-09	0.790824	0.67	0.669	9.89169e-05	5.38843e-05	0.442065	0.452	0.384	1	2.4557e-05	0.553687	0.519	0.463	0.499612	0.000295852	0.637737	0.436	0.402	1	0.00288125	0.522171	0.379	0.362	1	6.9816e-06	0.601968	0.546	0.478	0.142041	0.0147271	0.367922	0.476	0.493	1	8.76734e-43	1.06857	0.848	0.645	1.78372e-38	0.0147271	7.01388e-42
mt-Co2	1.16819e-40	0.771525	1	0.998	2.37668e-36	8.11569e-39	0.56086	0.994	0.991	1.65114e-34	1.18721e-39	0.628704	1	0.991	2.41537e-35	1.14888e-48	0.692587	1	0.99	2.33739e-44	5.36373e-52	0.57775	1	0.995	1.09125e-47	3.07921e-25	0.591924	0.992	0.98	6.26466e-21	2.77119e-53	0.638269	1	0.993	5.63799e-49	1.52245e-07	0.258123	0.984	0.993	0.00309742	1.52245e-07	2.21695e-52
Cadm1	1.73113e-07	0.615984	0.709	0.798	0.00352198	3.37974e-19	0.64685	0.867	0.833	6.87609e-15	4.95429e-20	0.60873	0.896	0.837	1.00795e-15	0.00010089	0.504736	0.679	0.821	1	8.42686e-07	0.483924	0.685	0.796	0.0171444	4.87941e-12	0.591542	0.815	0.8	9.92716e-08	3.39694e-19	0.543878	0.848	0.829	6.91108e-15	1.22264e-13	0.503664	0.812	0.871	2.48745e-09	0.00010089	3.96343e-19
Tmem255a	9.55829e-16	1.06807	0.757	0.684	1.94463e-11	3.09102e-28	0.783837	0.837	0.685	6.28869e-24	9.26531e-22	0.816496	0.837	0.729	1.88503e-17	1.22647e-19	0.774147	0.744	0.667	2.49525e-15	4.53281e-24	0.740133	0.74	0.648	9.222e-20	8.24588e-07	0.591307	0.655	0.645	0.0167763	7.43937e-25	0.817156	0.817	0.728	1.51354e-20	2.51339e-16	0.66828	0.712	0.676	5.11349e-12	8.24588e-07	2.47282e-27
Chl1	0.00039618	0.752229	0.476	0.45	1	2.1602e-05	0.654232	0.518	0.494	0.439494	2.23579e-10	0.768026	0.622	0.518	4.54872e-06	0.0135836	0.569113	0.449	0.494	1	0.753246	0.362398	0.393	0.51	1	0.000887579	0.590111	0.496	0.485	1	2.37745e-14	0.861965	0.652	0.539	4.83692e-10	0.011266	0.578215	0.466	0.534	1	0.753246	1.90196e-13
Npy2r	1.70942e-17	1.43212	0.524	0.25	3.47781e-13	2.08957e-16	1.00484	0.464	0.247	4.25124e-12	8.24574e-22	1.18018	0.563	0.271	1.6776e-17	1.34014e-23	1.22522	0.487	0.217	2.72652e-19	5.26285e-41	1.36749	0.548	0.229	1.07073e-36	1.73094e-05	0.583735	0.277	0.158	0.352161	2.2875e-25	0.991579	0.476	0.191	4.65393e-21	7.94342e-45	1.32741	0.539	0.191	1.61609e-40	1.73094e-05	6.35474e-44
Ly6h	2.19315e-19	0.839979	0.854	0.875	4.46197e-15	2.87352e-36	0.715254	0.946	0.91	5.84618e-32	4.7233e-16	0.596503	0.889	0.919	9.60955e-12	5.49856e-22	0.655492	0.859	0.892	1.11868e-17	8.30533e-24	0.561608	0.84	0.855	1.68972e-19	1.11618e-16	0.578772	0.882	0.927	2.27086e-12	6.34022e-29	0.63083	0.933	0.9	1.28992e-24	2.67837e-30	0.706828	0.895	0.904	5.44914e-26	4.7233e-16	2.29882e-35
Ptpro	0.00740379	0.838973	0.388	0.381	1	1.93838e-14	0.804495	0.554	0.403	3.94364e-10	3.3093e-15	0.891981	0.6	0.43	6.73278e-11	9.77519e-05	0.703957	0.391	0.339	1	0.00632148	0.637301	0.347	0.347	1	0.000270664	0.574289	0.429	0.37	1	1.32436e-15	0.838827	0.585	0.426	2.69442e-11	6.57201e-08	0.754078	0.45	0.377	0.00133708	0.00740379	1.05949e-14
Pam	0.053205	0.31882	0.291	0.487	1	0.00810919	0.359542	0.53	0.559	1	0.138356	0.646287	0.504	0.545	1	0.00105222	0.729595	0.538	0.55	1	0.999878	0.274649	0.434	0.559	1	0.200958	0.574221	0.479	0.549	1	3.10964e-05	0.763344	0.591	0.568	0.632656	0.00259037	0.809356	0.529	0.581	1	0.999878	0.000248744
Cdh2	1.18988e-09	0.874907	0.621	0.571	2.42082e-05	0.00805327	0.412106	0.5	0.57	1	5.37359e-05	0.674681	0.556	0.57	1	1.94527e-11	0.692932	0.641	0.562	3.95765e-07	0.000128438	0.558859	0.498	0.529	1	6.82347e-05	0.572768	0.529	0.516	1	2.79131e-14	0.765307	0.665	0.585	5.67893e-10	5.4251e-16	0.740228	0.634	0.561	1.10374e-11	0.00805327	4.34008e-15
Dpp10	0.00619599	0.631717	0.379	0.348	1	1.80981e-15	0.777042	0.536	0.33	3.68205e-11	2.77121e-11	0.647074	0.607	0.434	5.63802e-07	2.49189e-07	0.708381	0.455	0.351	0.00506975	6.80536e-06	0.575148	0.447	0.396	0.138455	0.00253995	0.572479	0.378	0.318	1	1.34906e-05	0.519757	0.451	0.363	0.274466	0.000269457	0.603064	0.419	0.393	1	0.00619599	1.44785e-14
Ncam1	4.38855e-14	0.599305	0.864	0.936	8.9285e-10	1.70874e-21	0.561792	0.952	0.959	3.47643e-17	1.86734e-16	0.491587	0.97	0.968	3.79911e-12	4.62125e-21	0.524937	0.981	0.959	9.40193e-17	1.8687e-12	0.509939	0.895	0.941	3.80187e-08	1.26289e-19	0.572106	0.992	0.963	2.56935e-15	3.94806e-25	0.618999	0.945	0.968	8.03233e-21	9.99259e-19	0.531097	0.932	0.964	2.03299e-14	1.8687e-12	3.15845e-24
Atp8a1	0.00281228	0.621367	0.534	0.626	1	9.06178e-05	0.404411	0.62	0.684	1	1.97901e-14	0.625333	0.756	0.688	4.02629e-10	6.88911e-08	0.599346	0.635	0.639	0.00140159	3.04013e-11	0.561385	0.63	0.636	6.18514e-07	4.07449e-06	0.568899	0.63	0.666	0.0828955	3.2381e-15	0.585138	0.738	0.691	6.58791e-11	7.74217e-08	0.553539	0.618	0.663	0.00157514	0.00281228	2.59048e-14
Gramd1a	0.042589	0.593154	0.291	0.265	1	0.0823979	0.46869	0.331	0.341	1	0.343683	0.272739	0.341	0.375	1	0.983128	0.280514	0.25	0.302	1	0.30919	0.450547	0.265	0.29	1	0.000230999	0.566334	0.42	0.344	1	0.0395207	0.356694	0.354	0.353	1	0.0763911	0.527486	0.356	0.396	1	0.983128	0.0018465
Nell1	0.715662	0.450865	0.194	0.25	1	0.395738	0.392033	0.283	0.3	1	0.000978878	0.618345	0.348	0.278	1	0.221565	0.463219	0.25	0.246	1	0.000221141	0.611839	0.301	0.242	1	0.000645064	0.554379	0.336	0.252	1	5.03829e-06	0.539747	0.378	0.276	0.102504	0.0305379	0.48989	0.309	0.296	1	0.715662	4.03056e-05
Lsamp	0.000441864	0.469431	0.67	0.786	1	1.08756e-09	0.389154	0.819	0.835	2.21264e-05	1.63951e-11	0.429044	0.867	0.855	3.33559e-07	2.2798e-13	0.440674	0.853	0.846	4.63826e-09	7.53484e-08	0.358751	0.735	0.834	0.00153296	1.38513e-13	0.546715	0.874	0.865	2.81805e-09	3.94588e-20	0.498781	0.909	0.861	8.0279e-16	1.7197e-10	0.393434	0.764	0.834	3.49874e-06	0.000441864	3.15671e-19
mt-Cytb	3.1183e-44	0.769029	1	0.998	6.34417e-40	5.48887e-33	0.514363	1	0.988	1.11671e-28	3.31509e-36	0.617006	1	0.99	6.74454e-32	3.01321e-46	0.691626	0.994	0.99	6.13038e-42	3.17853e-51	0.590743	0.995	0.995	6.46672e-47	6.37937e-22	0.546092	0.992	0.974	1.29788e-17	8.41448e-53	0.64306	1	0.994	1.71192e-48	1.19979e-07	0.258446	0.995	0.997	0.00244098	1.19979e-07	6.73158e-52
Ccnt2	0.7847	0.483528	0.427	0.611	1	0.00550337	0.301198	0.608	0.71	1	0.00995867	0.274069	0.615	0.689	1	0.000101766	0.492802	0.59	0.666	1	0.00368162	0.3955	0.534	0.633	1	4.4855e-10	0.544765	0.773	0.742	9.12576e-06	0.00144219	0.310577	0.616	0.704	1	0.100763	0.366423	0.508	0.65	1	0.7847	3.5884e-09
Tmem158	0.181904	0.633613	0.379	0.442	1	5.25112e-14	0.919591	0.633	0.512	1.06834e-09	1.64087e-06	0.624904	0.578	0.522	0.0333835	0.0328945	0.436669	0.41	0.44	1	0.0011855	0.5925	0.438	0.46	1	0.000110132	0.530426	0.529	0.496	1	1.34212e-10	0.529401	0.61	0.504	2.73054e-06	0.000137958	0.654128	0.466	0.468	1	0.181904	4.20089e-13
App	9.19796e-10	0.605824	0.806	0.892	1.87133e-05	5.33577e-19	0.564128	0.88	0.897	1.08556e-14	6.98431e-28	0.722523	0.919	0.923	1.42096e-23	2.26958e-22	0.644055	0.878	0.921	4.61745e-18	3.39009e-25	0.49326	0.877	0.898	6.89714e-21	3.84332e-11	0.523003	0.824	0.873	7.81923e-07	9.28992e-32	0.655715	0.933	0.923	1.89003e-27	3.33453e-20	0.45985	0.885	0.928	6.78411e-16	9.19796e-10	7.43193e-31
Gm42851	0.81624	0.400466	0.097	0.115	1	0.156748	0.367049	0.205	0.185	1	0.0147094	0.426166	0.222	0.166	1	0.540075	0.379899	0.16	0.162	1	0.342638	0.375193	0.155	0.148	1	0.000158527	0.515589	0.286	0.179	1	0.341674	0.31319	0.165	0.155	1	0.0150533	0.462227	0.168	0.124	1	0.81624	0.00126752
mt-Co1	2.09017e-46	0.811167	1	0.999	4.25245e-42	1.47291e-34	0.510159	1	0.993	2.99664e-30	8.65394e-42	0.601951	1	0.99	1.76064e-37	6.31306e-53	0.672089	1	0.997	1.28439e-48	3.36966e-51	0.53602	1	0.997	6.85557e-47	1.02793e-20	0.512933	0.975	0.983	2.09132e-16	4.20076e-59	0.636225	1	0.996	8.54644e-55	8.85058e-19	0.328982	1	1	1.80065e-14	8.85058e-19	3.36061e-58
Atp6v0b	0.00319553	0.592863	0.592	0.758	1	9.41131e-10	0.512937	0.729	0.783	1.91473e-05	2.21268e-05	0.367191	0.704	0.776	0.45017	2.82912e-12	0.594705	0.712	0.717	5.75585e-08	1.76974e-05	0.46743	0.598	0.708	0.360054	5.76483e-08	0.510897	0.756	0.791	0.00117285	4.94176e-12	0.44079	0.774	0.771	1.0054e-07	1.54902e-11	0.515875	0.723	0.803	3.15147e-07	0.00319553	2.2633e-11
Grina	0.0133628	0.523757	0.524	0.629	1	0.000323967	0.378296	0.584	0.641	1	5.76041e-05	0.396526	0.659	0.708	1	0.0497885	0.412817	0.5	0.611	1	0.457046	0.280669	0.466	0.616	1	1.58783e-07	0.510658	0.672	0.689	0.00323043	9.32505e-06	0.480781	0.64	0.694	0.189718	0.000125623	0.335499	0.644	0.756	1	0.457046	1.27026e-06
Ube3a	1.66917e-12	0.554084	0.913	0.971	3.39594e-08	5.42929e-19	0.34006	0.976	0.985	1.10459e-14	8.78635e-15	0.330681	0.985	0.98	1.78758e-10	1.4334e-17	0.392366	0.968	0.986	2.91626e-13	1.03551e-18	0.319173	0.968	0.979	2.10674e-14	3.34565e-17	0.495903	0.975	0.983	6.80672e-13	6.70225e-17	0.38036	0.963	0.99	1.36357e-12	6.89998e-28	0.454235	0.958	0.983	1.4038e-23	1.66917e-12	5.51998e-27
Pcdh17	1.79959e-08	0.521844	0.845	0.872	0.000366126	5.76736e-19	0.514663	0.904	0.859	1.17337e-14	1.36706e-13	0.490867	0.896	0.89	2.78128e-09	4.38164e-17	0.551157	0.891	0.89	8.91445e-13	1.05111e-11	0.440694	0.826	0.879	2.13848e-07	1.48979e-10	0.494505	0.84	0.848	3.03097e-06	3.74336e-25	0.611979	0.896	0.894	7.61586e-21	1.58917e-19	0.586133	0.848	0.896	3.23317e-15	1.79959e-08	2.99469e-24
Tia1	3.97487e-05	0.567807	0.612	0.682	0.808688	0.000130236	0.332327	0.705	0.802	1	2.43892e-10	0.446927	0.77	0.785	4.96198e-06	4.64359e-09	0.550165	0.705	0.796	9.44737e-05	0.127531	0.281841	0.548	0.726	1	2.41619e-11	0.494259	0.807	0.811	4.91574e-07	3.03308e-09	0.480548	0.756	0.819	6.17081e-05	1.21185e-05	0.386585	0.649	0.782	0.24655	0.127531	1.93295e-10
Pcdh10	0.0416887	0.570162	0.447	0.5	1	6.38722e-09	0.670375	0.602	0.552	0.000129948	8.14342e-07	0.564657	0.585	0.532	0.0165678	3.97875e-09	0.723803	0.571	0.49	8.09478e-05	2.07309e-07	0.605513	0.539	0.513	0.0042177	0.0132126	0.49343	0.462	0.46	1	8.21677e-17	0.729941	0.665	0.521	1.6717e-12	1.40577e-11	0.589352	0.607	0.506	2.86004e-07	0.0416887	6.57342e-16
Bsg	2.58852e-05	0.704393	0.592	0.662	0.526635	6.80593e-06	0.52115	0.602	0.659	0.138467	5.19937e-12	0.588428	0.756	0.726	1.05781e-07	1.64203e-05	0.634049	0.564	0.608	0.334071	0.0124542	0.390525	0.511	0.635	1	4.5125e-06	0.490735	0.655	0.685	0.0918068	1.11664e-19	0.628328	0.768	0.709	2.2718e-15	1.21027e-05	0.354934	0.654	0.77	0.24623	0.0124542	8.93311e-19
mt-Nd3	4.90725e-16	0.72553	0.825	0.857	9.9838e-12	5.40234e-30	0.588324	0.946	0.938	1.09911e-25	9.37439e-29	0.640519	0.978	0.946	1.90722e-24	1.17762e-25	0.604963	0.929	0.894	2.39587e-21	2.77408e-28	0.604688	0.872	0.9	5.64386e-24	8.19035e-14	0.488816	0.849	0.904	1.66633e-09	1.48321e-38	0.663152	0.976	0.941	3.0176e-34	9.88301e-09	0.348119	0.775	0.88	0.00020107	9.88301e-09	1.18657e-37
Brinp2	0.530074	0.343408	0.165	0.223	1	0.0292056	0.43362	0.289	0.265	1	0.164991	0.395609	0.237	0.224	1	0.792873	0.334759	0.167	0.201	1	0.665357	0.357764	0.178	0.19	1	0.0888296	0.4876	0.269	0.249	1	1.21093e-06	0.587402	0.36	0.252	0.0246364	0.188099	0.48817	0.215	0.211	1	0.792873	9.68741e-06
Resp18	0.0338602	0.665851	0.476	0.589	1	6.49489e-09	0.530257	0.657	0.67	0.000132138	1.56136e-10	0.621658	0.748	0.703	3.17659e-06	2.62221e-06	0.566906	0.59	0.614	0.0533489	0.109713	0.345339	0.479	0.604	1	1.12327e-05	0.487457	0.655	0.665	0.228529	0.000173577	0.405581	0.591	0.636	1	5.88442e-11	0.633167	0.639	0.648	1.19719e-06	0.109713	4.70754e-10
Itfg1	4.93499e-09	0.786566	0.612	0.561	0.000100402	2.31745e-05	0.465568	0.596	0.64	0.471485	3.92556e-10	0.598524	0.681	0.643	7.98655e-06	1.25586e-07	0.507272	0.622	0.618	0.00255504	0.248767	0.329942	0.479	0.615	1	1.24527e-05	0.487089	0.605	0.61	0.25335	1.02673e-14	0.591013	0.72	0.671	2.08887e-10	0.0187543	0.368146	0.518	0.634	1	0.248767	8.2138e-14
Gabrb1	0.0678722	0.382391	0.563	0.735	1	0.00191973	0.344029	0.614	0.713	1	2.23965e-13	0.611481	0.77	0.76	4.55658e-09	1.16938e-08	0.546065	0.673	0.715	0.00023791	0.0276395	0.312294	0.562	0.709	1	2.47889e-07	0.483113	0.689	0.738	0.0050433	1.25888e-09	0.516551	0.707	0.78	2.56118e-05	3.27519e-09	0.512995	0.66	0.722	6.66338e-05	0.0678722	1.79172e-12
Npdc1	1.17675e-05	0.694245	0.553	0.557	0.23941	1.3205e-12	0.623406	0.669	0.608	2.68656e-08	1.70843e-10	0.576024	0.667	0.621	3.4758e-06	1.14055e-05	0.569812	0.532	0.524	0.232045	0.355695	0.326201	0.425	0.529	1	0.000212133	0.481927	0.597	0.606	1	7.98042e-10	0.523149	0.64	0.596	1.62362e-05	0.000132407	0.505885	0.539	0.607	1	0.355695	1.0564e-11
Gaa	6.99241e-08	0.574678	0.748	0.841	0.00142261	6.07132e-22	0.587651	0.88	0.846	1.23521e-17	1.00126e-25	0.664148	0.933	0.894	2.03706e-21	2.73321e-17	0.64778	0.846	0.856	5.56072e-13	4.97983e-12	0.424939	0.763	0.832	1.01315e-07	3.88093e-09	0.479121	0.79	0.844	7.89575e-05	5.78291e-23	0.540086	0.902	0.886	1.17653e-18	1.20952e-14	0.485466	0.796	0.885	2.46077e-10	6.99241e-08	8.01006e-25
Slc22a17	0.000217791	0.508064	0.66	0.827	1	1.3587e-13	0.478828	0.813	0.84	2.76427e-09	6.31046e-19	0.551737	0.874	0.874	1.28386e-14	3.34424e-16	0.560664	0.782	0.808	6.80386e-12	1.19319e-07	0.407524	0.689	0.804	0.00242755	4.21572e-10	0.478843	0.79	0.816	8.57688e-06	9.11284e-16	0.450189	0.823	0.855	1.85401e-11	3.83352e-14	0.50241	0.78	0.876	7.79929e-10	0.000217791	5.04837e-18
Shisa9	0.762484	0.385832	0.223	0.295	1	0.0782982	0.397631	0.319	0.324	1	0.0215338	0.401017	0.363	0.349	1	0.321316	0.447559	0.269	0.291	1	0.702161	0.353529	0.233	0.297	1	0.00310569	0.476149	0.361	0.289	1	0.0372852	0.331312	0.36	0.344	1	0.0140546	0.46302	0.33	0.32	1	0.762484	0.0245772
Fam13a	0.427523	0.412973	0.155	0.218	1	0.0326283	0.473642	0.259	0.23	1	0.00222417	0.554019	0.348	0.296	1	0.636694	0.307089	0.199	0.248	1	0.140698	0.557734	0.233	0.229	1	0.283027	0.474037	0.261	0.26	1	0.0561658	0.391834	0.28	0.259	1	0.110783	0.496337	0.204	0.189	1	0.636694	0.0176555
Itm2c	1.66404e-11	0.584904	0.825	0.897	3.38549e-07	3.27551e-25	0.66137	0.928	0.905	6.66403e-21	9.96564e-23	0.567824	0.956	0.923	2.02751e-18	5.79191e-08	0.385345	0.795	0.893	0.00117836	1.94372e-14	0.447951	0.826	0.879	3.95451e-10	9.22292e-09	0.470018	0.857	0.896	0.00018764	5.74299e-27	0.62785	0.915	0.923	1.16841e-22	3.50773e-21	0.52702	0.869	0.912	7.13648e-17	5.79191e-08	4.59439e-26
Maged1	0.00461944	0.513818	0.602	0.768	1	1.76581e-14	0.653649	0.783	0.784	3.59255e-10	1.52092e-11	0.486518	0.8	0.807	3.09431e-07	9.7356e-08	0.442324	0.679	0.743	0.00198071	0.00715795	0.320544	0.571	0.728	1	1.0911e-08	0.466623	0.756	0.788	0.000221985	4.26861e-18	0.562985	0.811	0.812	8.68448e-14	1.2357e-06	0.342555	0.696	0.798	0.0251403	0.00715795	3.41489e-17
Cd47	2.79164e-07	0.511285	0.709	0.791	0.00567959	2.54026e-09	0.347686	0.771	0.802	5.16815e-05	2.04916e-13	0.436816	0.807	0.807	4.16901e-09	2.46517e-05	0.350813	0.692	0.809	0.501539	2.52527e-10	0.450744	0.721	0.795	5.13765e-06	7.92315e-07	0.466227	0.756	0.797	0.0161197	2.25386e-12	0.408871	0.799	0.832	4.58548e-08	3.37757e-12	0.449684	0.806	0.868	6.87167e-08	2.46517e-05	1.63932e-12
Tmx1	0.000852088	0.632918	0.485	0.488	1	0.0187052	0.400305	0.464	0.517	1	2.03069e-06	0.553739	0.578	0.543	0.0413143	0.0561855	0.455164	0.417	0.475	1	0.0374348	0.454797	0.429	0.49	1	0.00575084	0.462588	0.496	0.527	1	2.20824e-05	0.500092	0.543	0.551	0.449266	0.0238082	0.400338	0.487	0.575	1	0.0561855	1.62454e-05
Aplp1	1.65933e-08	0.699304	0.689	0.716	0.00033759	8.64772e-18	0.626075	0.777	0.758	1.75938e-13	2.62339e-19	0.631838	0.822	0.804	5.33728e-15	6.19366e-14	0.658783	0.705	0.692	1.2601e-09	3.16591e-07	0.505404	0.616	0.706	0.00644105	1.81262e-10	0.458774	0.756	0.791	3.68778e-06	1.16683e-09	0.518986	0.72	0.781	2.37392e-05	5.92778e-05	0.364434	0.639	0.756	1	5.92778e-05	2.09871e-18
Cpne7	0.936253	0.453066	0.184	0.215	1	6.46873e-05	0.592625	0.337	0.253	1	0.0293511	0.423194	0.311	0.279	1	0.00129088	0.579145	0.295	0.23	1	0.00408474	0.599681	0.265	0.227	1	0.0351423	0.456641	0.294	0.257	1	0.0161979	0.505565	0.293	0.257	1	8.01646e-05	0.703874	0.283	0.207	1	0.936253	0.000517382
Scd2	0.00174564	0.554053	0.553	0.65	1	2.15161e-09	0.442586	0.735	0.754	4.37744e-05	9.09222e-12	0.515693	0.807	0.778	1.84981e-07	1.16425e-05	0.451562	0.641	0.71	0.236868	0.00108862	0.323982	0.58	0.686	1	3.10942e-05	0.452067	0.681	0.757	0.632611	1.11806e-17	0.5417	0.811	0.778	2.27469e-13	0.000170473	0.40193	0.644	0.772	1	0.00174564	8.94445e-17
Adgrb3	0.901319	0.396464	0.32	0.452	1	0.0922273	0.378232	0.458	0.549	1	0.000477535	0.469131	0.548	0.543	1	0.00375869	0.501617	0.474	0.516	1	0.192285	0.44348	0.388	0.481	1	0.000749697	0.451971	0.529	0.536	1	1.3111e-05	0.486141	0.561	0.561	0.266744	0.00185745	0.560202	0.435	0.458	1	0.901319	0.000104883
Clk1	0.00848984	0.519639	0.466	0.493	1	0.00632687	0.389783	0.518	0.575	1	1.5736e-06	0.423203	0.615	0.569	0.032015	1.67731e-05	0.560901	0.571	0.594	0.341249	0.00136881	0.507628	0.489	0.543	1	0.00824165	0.449175	0.513	0.521	1	5.19002e-05	0.404377	0.579	0.579	1	0.0033532	0.432332	0.513	0.583	1	0.00848984	1.25888e-05
Canx	1.90437e-22	0.774337	0.883	0.874	3.87445e-18	2.84832e-21	0.548482	0.88	0.874	5.79491e-17	6.90846e-27	0.662552	0.919	0.895	1.40553e-22	1.0122e-22	0.61574	0.859	0.878	2.05932e-18	3.15404e-14	0.46236	0.813	0.871	6.4169e-10	7.99432e-08	0.44481	0.782	0.863	0.00162645	2.0636e-31	0.633663	0.939	0.918	4.1984e-27	4.24233e-20	0.450374	0.906	0.925	8.63102e-16	7.99432e-08	1.65088e-30
Ptprs	0.0310373	0.491022	0.553	0.736	1	1.31354e-10	0.461655	0.753	0.78	2.67241e-06	5.09855e-11	0.475228	0.793	0.808	1.0373e-06	2.21451e-05	0.436235	0.654	0.744	0.450543	0.000364808	0.36414	0.616	0.734	1	1.67645e-05	0.442892	0.723	0.806	0.341074	8.99187e-08	0.342848	0.744	0.796	0.0018294	1.63423e-09	0.4237	0.723	0.823	3.32484e-05	0.0310373	4.07884e-10
Tmed7	0.0127381	0.821445	0.398	0.412	1	0.000121005	0.475078	0.506	0.504	1	8.38372e-05	0.453791	0.533	0.504	1	0.977488	0.414298	0.346	0.469	1	0.00246928	0.570295	0.434	0.46	1	0.0155091	0.442488	0.445	0.465	1	0.00133044	0.432411	0.512	0.524	1	0.162643	0.3573	0.424	0.512	1	0.977488	0.000670501
Synpr	0.362182	0.28736	0.117	0.167	1	0.821973	0.376464	0.145	0.153	1	0.288042	0.433795	0.207	0.193	1	0.000774733	0.681289	0.244	0.17	1	0.805585	0.281114	0.151	0.174	1	0.270127	0.442178	0.193	0.176	1	0.294903	0.323679	0.22	0.209	1	0.0707482	0.557345	0.225	0.202	1	0.821973	0.00618109
Prnp	0.000114413	0.422542	0.738	0.859	1	1.20769e-10	0.439186	0.801	0.85	2.45704e-06	3.61118e-21	0.617834	0.904	0.899	7.34694e-17	2.23078e-14	0.52411	0.808	0.845	4.53853e-10	2.20173e-17	0.522368	0.79	0.833	4.47941e-13	3.42643e-06	0.441428	0.748	0.84	0.0697107	1.17244e-17	0.514229	0.878	0.887	2.38532e-13	1.41744e-17	0.496642	0.827	0.886	2.88378e-13	0.000114413	2.88894e-20
Calr	0.000120886	0.572751	0.631	0.748	1	2.30528e-09	0.614951	0.663	0.688	4.6901e-05	7.99855e-11	0.556138	0.711	0.714	1.62731e-06	0.00107682	0.494474	0.558	0.648	1	0.00111922	0.429563	0.539	0.644	1	0.00015527	0.441122	0.622	0.688	1	1.71345e-16	0.560497	0.768	0.747	3.48602e-12	7.62102e-05	0.398157	0.649	0.784	1	0.00111922	1.37076e-15
Gria3	0.858804	0.401918	0.252	0.309	1	0.00764821	0.463941	0.343	0.31	1	2.68535e-06	0.631837	0.437	0.323	0.0546334	0.0359017	0.357496	0.346	0.332	1	0.130284	0.393631	0.283	0.289	1	0.0307995	0.438437	0.353	0.319	1	2.56118e-06	0.588086	0.439	0.345	0.0521073	0.000538775	0.610723	0.351	0.301	1	0.858804	2.04893e-05
Tial1	0.0168472	0.773047	0.437	0.497	1	6.05031e-08	0.540269	0.572	0.533	0.00123094	1.5707e-07	0.500066	0.585	0.529	0.0031956	9.45726e-08	0.656569	0.545	0.479	0.00192408	7.64541e-05	0.569411	0.479	0.492	1	0.0298346	0.434098	0.487	0.518	1	6.07568e-13	0.692713	0.622	0.525	1.2361e-08	3.37769e-15	0.713087	0.665	0.625	6.87191e-11	0.0298346	2.70215e-14
Tecr	6.07274e-09	0.709053	0.67	0.685	0.00012355	1.45503e-05	0.432398	0.657	0.724	0.296025	8.8412e-12	0.565891	0.77	0.747	1.79874e-07	8.76745e-08	0.586197	0.628	0.674	0.00178374	0.00161119	0.381332	0.566	0.687	1	5.38626e-05	0.431892	0.697	0.771	1	6.32684e-06	0.425716	0.659	0.727	0.12872	0.017943	0.33183	0.586	0.742	1	0.017943	7.07296e-11
Nrxn2	6.65163e-12	0.516595	0.835	0.87	1.35327e-07	6.14786e-21	0.535606	0.867	0.883	1.25078e-16	2.05522e-24	0.581069	0.941	0.898	4.18135e-20	7.19838e-11	0.531514	0.776	0.878	1.46451e-06	3.52072e-10	0.400331	0.731	0.843	7.1629e-06	6.08549e-09	0.41707	0.798	0.866	0.000123809	7.06769e-17	0.46724	0.86	0.906	1.43792e-12	1.11524e-15	0.429446	0.822	0.906	2.26895e-11	6.08549e-09	1.64418e-23
Itm2b	0.00192698	0.512569	0.573	0.69	1	0.00432032	0.31654	0.627	0.745	1	1.48246e-10	0.542901	0.763	0.755	3.01607e-06	9.2491e-05	0.475369	0.596	0.686	1	0.00051216	0.389695	0.571	0.69	1	0.00150819	0.416375	0.605	0.702	1	3.32581e-13	0.484507	0.762	0.739	6.76636e-09	2.18322e-10	0.515397	0.686	0.735	4.44177e-06	0.00432032	2.66065e-12
Gria2	1.97535e-21	0.675331	0.942	0.931	4.01884e-17	1.9099e-18	0.390739	0.988	0.963	3.88569e-14	3.38509e-16	0.405853	0.948	0.962	6.88697e-12	1.77645e-37	0.626758	0.987	0.979	3.61418e-33	1.16461e-21	0.486512	0.918	0.957	2.36939e-17	9.75507e-19	0.415446	0.966	0.959	1.98467e-14	2.87074e-35	0.601429	0.988	0.976	5.84053e-31	1.37001e-40	0.604342	0.963	0.977	2.78728e-36	3.38509e-16	1.09601e-39
Hspa5	1.46631e-05	0.701545	0.563	0.581	0.298322	5.58318e-09	0.621991	0.62	0.597	0.00011359	2.02878e-08	0.545819	0.637	0.569	0.000412755	0.629457	0.297997	0.417	0.53	1	0.0150129	0.515031	0.429	0.483	1	0.0890309	0.413524	0.471	0.539	1	5.29513e-12	0.541975	0.695	0.641	1.07729e-07	0.00667409	0.383013	0.524	0.607	1	0.629457	4.2361e-11
Chka	0.0637512	0.273416	0.252	0.446	1	0.530807	0.379858	0.392	0.495	1	0.249252	0.299808	0.437	0.506	1	0.588274	0.334776	0.34	0.484	1	0.317813	0.335038	0.306	0.44	1	0.00351231	0.410585	0.529	0.542	1	0.186852	0.257669	0.445	0.503	1	0.712586	0.407999	0.34	0.441	1	0.712586	0.0277555
Cntnap4	0.338314	0.255807	0.126	0.184	1	0.73988	0.294441	0.211	0.237	1	0.000129405	0.481323	0.341	0.247	1	0.237744	0.347223	0.154	0.222	1	0.742693	0.405339	0.196	0.222	1	0.00970305	0.410511	0.303	0.237	1	1.13298e-06	0.530567	0.36	0.246	0.0230504	0.326726	0.505141	0.215	0.222	1	0.742693	9.06378e-06
Slc9a6	0.500516	0.377706	0.301	0.449	1	0.0134148	0.417022	0.458	0.51	1	2.7197e-05	0.462572	0.563	0.539	0.553322	5.48384e-05	0.567322	0.506	0.509	1	0.0231672	0.492448	0.425	0.486	1	0.150321	0.407884	0.437	0.514	1	3.73398e-10	0.624462	0.591	0.542	7.59679e-06	0.156012	0.377792	0.424	0.509	1	0.500516	2.98719e-09
AC149090.1	0.00103984	0.517034	0.631	0.76	1	0.00340696	0.375479	0.639	0.763	1	0.00122918	0.334565	0.615	0.688	1	0.000561136	0.418956	0.647	0.757	1	1.56544e-08	0.590733	0.635	0.687	0.000318488	0.000124852	0.406285	0.672	0.726	1	0.00151998	0.328617	0.549	0.576	1	8.43547e-07	0.512513	0.649	0.737	0.017162	0.00340696	1.25235e-07
Saraf	0.140356	0.434603	0.505	0.689	1	4.19941e-14	0.630919	0.723	0.691	8.5437e-10	2.23074e-07	0.524182	0.689	0.742	0.00453845	2.42064e-07	0.556855	0.635	0.709	0.00492479	0.0436684	0.315475	0.521	0.653	1	4.91505e-06	0.400141	0.672	0.712	0.0999966	3.61239e-14	0.573046	0.75	0.762	7.34941e-10	7.68394e-05	0.437759	0.628	0.753	1	0.140356	2.88991e-13
Serinc1	2.56997e-14	0.614687	0.864	0.91	5.22861e-10	1.15862e-20	0.493732	0.886	0.911	2.3572e-16	5.8715e-21	0.544669	0.926	0.94	1.19456e-16	1.07325e-19	0.499453	0.885	0.908	2.18352e-15	1.35585e-08	0.35343	0.767	0.904	0.000275848	1.98355e-09	0.394334	0.798	0.899	4.03553e-05	2.26137e-33	0.555976	0.951	0.942	4.60075e-29	2.17591e-12	0.357179	0.843	0.935	4.42688e-08	1.35585e-08	1.80909e-32
Clcn3	0.15511	0.507753	0.456	0.599	1	4.68602e-05	0.36668	0.627	0.681	0.95337	1.74327e-17	0.633842	0.785	0.672	3.54667e-13	8.04662e-07	0.547269	0.628	0.673	0.0163708	0.000898796	0.404744	0.553	0.663	1	0.0246902	0.393754	0.571	0.675	1	5.16058e-10	0.489567	0.72	0.727	1.04992e-05	0.000240576	0.346836	0.592	0.681	1	0.15511	1.39461e-16
Acp1	2.98447e-10	0.802515	0.699	0.725	6.07191e-06	3.07748e-07	0.279515	0.753	0.805	0.00626114	7.67432e-07	0.437504	0.741	0.789	0.0156134	4.19505e-20	0.688974	0.827	0.803	8.53483e-16	5.07265e-14	0.520376	0.726	0.764	1.03203e-09	8.63112e-08	0.392048	0.79	0.79	0.001756	2.41081e-05	0.326479	0.726	0.805	0.490479	1.29301e-07	0.530706	0.649	0.726	0.00263064	2.41081e-05	3.35604e-19
Tmem179	0.880939	0.302234	0.417	0.605	1	0.333679	0.269419	0.476	0.603	1	0.000870842	0.349294	0.607	0.658	1	0.0789997	0.489452	0.455	0.561	1	0.86445	0.278706	0.402	0.556	1	0.00110875	0.391246	0.58	0.646	1	7.93171e-07	0.513453	0.61	0.658	0.0161371	0.0523396	0.375615	0.518	0.66	1	0.880939	6.34535e-06
Ssr1	0.00182248	0.557792	0.573	0.682	1	1.72674e-18	0.620246	0.807	0.771	3.51306e-14	2.03499e-11	0.547587	0.756	0.763	4.14019e-07	9.02807e-10	0.523132	0.692	0.721	1.83676e-05	9.66329e-07	0.416763	0.644	0.729	0.01966	5.19991e-06	0.390105	0.731	0.782	0.105792	8.57528e-08	0.345068	0.732	0.794	0.00174464	1.53332e-06	0.457075	0.67	0.786	0.0311953	0.00182248	1.3814e-17
Gabrg2	0.0719259	0.577367	0.417	0.486	1	0.235914	0.265947	0.488	0.584	1	1.7187e-07	0.453153	0.644	0.601	0.0034967	0.00429807	0.412302	0.526	0.593	1	0.172067	0.345792	0.475	0.587	1	0.00114993	0.387343	0.555	0.567	1	2.31364e-06	0.409023	0.616	0.627	0.047071	0.0802991	0.379405	0.476	0.596	1	0.235914	1.37496e-06
Ssr3	0.0164133	0.623571	0.427	0.46	1	0.000456229	0.519388	0.5	0.528	1	6.18076e-09	0.512445	0.615	0.544	0.000125748	0.22486	0.425966	0.391	0.475	1	0.606181	0.276721	0.333	0.455	1	0.0316326	0.386684	0.462	0.498	1	1.23807e-05	0.463629	0.561	0.564	0.251885	0.00088011	0.516519	0.466	0.502	1	0.606181	4.94461e-08
Gabrg1	0.258553	0.361877	0.214	0.33	1	0.0160902	0.439492	0.41	0.414	1	0.000123728	0.633359	0.459	0.408	1	0.000205522	0.57448	0.417	0.37	1	0.270019	0.352038	0.324	0.358	1	0.264564	0.384485	0.37	0.398	1	3.03869e-13	0.753644	0.579	0.425	6.18222e-09	2.56561e-06	0.731954	0.429	0.366	0.0521974	0.270019	2.43095e-12
Clstn1	3.08388e-07	0.549789	0.699	0.801	0.00627414	1.4009e-11	0.490112	0.777	0.838	2.85014e-07	3.41182e-14	0.526883	0.815	0.848	6.94134e-10	2.91298e-10	0.530709	0.744	0.817	5.92645e-06	4.95943e-10	0.419732	0.721	0.829	1.009e-05	2.45014e-07	0.384298	0.782	0.823	0.00498482	7.1898e-14	0.443751	0.841	0.858	1.46276e-09	7.27287e-08	0.381525	0.738	0.856	0.00147966	3.08388e-07	2.72945e-13
Podxl2	0.00336276	0.537805	0.553	0.659	1	3.25444e-09	0.448528	0.723	0.736	6.62115e-05	3.02835e-14	0.52719	0.793	0.762	6.16118e-10	0.00269795	0.475961	0.577	0.7	1	0.000207825	0.444143	0.575	0.688	1	0.000411101	0.382433	0.697	0.776	1	3.0311e-13	0.463074	0.768	0.756	6.16677e-09	0.0010504	0.290013	0.654	0.806	1	0.00336276	2.42268e-13
Reep5	0.000449896	0.485031	0.621	0.76	1	1.88281e-13	0.519594	0.765	0.802	3.83058e-09	2.4443e-12	0.489858	0.844	0.835	4.97294e-08	1.12033e-08	0.458934	0.699	0.757	0.000227931	5.33415e-07	0.361332	0.685	0.783	0.0108523	4.6132e-05	0.381519	0.714	0.802	0.938556	2.09778e-16	0.518828	0.823	0.843	4.26793e-12	7.80035e-05	0.315656	0.686	0.827	1	0.000449896	1.67822e-15
Pgrmc1	1.64932e-13	0.600128	0.816	0.883	3.35554e-09	7.76623e-17	0.530232	0.855	0.882	1.58004e-12	1.30305e-23	0.600375	0.926	0.914	2.65105e-19	5.79459e-23	0.714348	0.833	0.852	1.17891e-18	3.87983e-20	0.485277	0.831	0.865	7.89352e-16	2.41082e-07	0.38007	0.815	0.872	0.00490482	1.51576e-30	0.593611	0.933	0.909	3.08382e-26	1.2389e-21	0.495238	0.853	0.898	2.52055e-17	2.41082e-07	1.21261e-29
Gpm6a	1.54328e-23	0.629924	0.961	0.942	3.13981e-19	2.00191e-15	0.427643	0.898	0.935	4.07289e-11	2.51993e-26	0.565826	0.97	0.95	5.12679e-22	7.55672e-29	0.618113	0.936	0.948	1.53741e-24	9.76374e-13	0.331721	0.877	0.944	1.98643e-08	1.38198e-08	0.377896	0.849	0.908	0.000281164	3.23151e-35	0.586471	0.963	0.955	6.5745e-31	1.01244e-28	0.506546	0.953	0.97	2.05982e-24	1.38198e-08	2.58521e-34
March6	0.000366811	0.697469	0.553	0.635	1	0.00221116	0.430242	0.578	0.696	1	2.55241e-12	0.609044	0.741	0.725	5.19288e-08	0.343602	0.259165	0.487	0.647	1	0.848116	0.25877	0.47	0.651	1	0.00076562	0.37486	0.63	0.706	1	1.66608e-12	0.523886	0.726	0.734	3.38964e-08	9.98102e-05	0.335665	0.628	0.736	1	0.848116	1.33286e-11
Gabra3	0.0811374	0.600508	0.359	0.388	1	0.00338098	0.500184	0.428	0.43	1	2.07295e-05	0.600292	0.511	0.481	0.421742	0.0720835	0.422731	0.378	0.417	1	0.847751	0.348987	0.306	0.387	1	0.0332572	0.374138	0.429	0.426	1	0.000614248	0.452891	0.457	0.447	1	0.00515411	0.568329	0.398	0.407	1	0.847751	0.000165824
Wfs1	0.921873	0.468351	0.175	0.212	1	0.0996213	0.548098	0.223	0.207	1	0.167161	0.446106	0.252	0.249	1	0.0158889	0.696199	0.256	0.218	1	0.249824	0.429931	0.201	0.2	1	0.0876543	0.373676	0.227	0.193	1	4.72358e-05	0.604033	0.323	0.239	0.961012	0.55246	0.387741	0.157	0.162	1	0.921873	0.000377824
Clstn3	0.00138942	0.649361	0.524	0.597	1	7.40216e-10	0.596451	0.639	0.615	1.50597e-05	1.66741e-10	0.559356	0.704	0.69	3.39234e-06	0.0023765	0.407179	0.526	0.591	1	0.00172384	0.415541	0.516	0.596	1	0.00274542	0.369575	0.58	0.653	1	5.76217e-10	0.498149	0.683	0.685	1.17231e-05	2.54617e-07	0.40599	0.654	0.734	0.00518019	0.00274542	1.33392e-09
B4galt6	0.00116336	0.485851	0.612	0.751	1	0.000134152	0.392384	0.639	0.708	1	1.2266e-05	0.381798	0.726	0.78	0.249552	0.00119423	0.410785	0.609	0.714	1	0.276017	0.271388	0.53	0.69	1	8.54248e-05	0.369432	0.681	0.725	1	5.36173e-13	0.499861	0.774	0.782	1.09084e-08	2.18777e-11	0.545998	0.696	0.754	4.45101e-07	0.276017	4.28939e-12
Casc4	0.189963	0.481605	0.437	0.561	1	0.026257	0.334627	0.524	0.622	1	3.26055e-05	0.413953	0.607	0.637	0.663359	0.0568814	0.456502	0.474	0.577	1	0.0277648	0.449332	0.479	0.586	1	0.0754444	0.367871	0.521	0.634	1	3.75754e-09	0.45776	0.659	0.656	7.64471e-05	0.148517	0.287849	0.492	0.635	1	0.189963	3.00603e-08
Srsf11	0.728209	0.337511	0.437	0.619	1	0.00157904	0.335561	0.602	0.699	1	0.0900397	0.254427	0.563	0.694	1	0.0235047	0.3419	0.551	0.686	1	0.595006	0.267067	0.461	0.624	1	8.86407e-05	0.363074	0.681	0.709	1	0.000255848	0.289712	0.634	0.727	1	0.0160776	0.367423	0.55	0.696	1	0.728209	0.000708906
Nenf	0.00868265	0.681105	0.534	0.689	1	1.77739e-12	0.6758	0.711	0.733	3.6161e-08	2.1616e-09	0.614336	0.748	0.769	4.39777e-05	0.000186774	0.538849	0.583	0.68	1	0.01313	0.388258	0.548	0.675	1	0.00220578	0.361495	0.664	0.747	1	0.0107147	0.307705	0.646	0.73	1	0.0428681	0.34982	0.518	0.672	1	0.0428681	1.42191e-11
Tnfrsf21	0.564469	0.47757	0.272	0.315	1	0.00410282	0.464891	0.373	0.348	1	0.000618813	0.483027	0.415	0.361	1	0.501581	0.325486	0.263	0.289	1	0.561013	0.296089	0.256	0.334	1	0.0290131	0.354789	0.37	0.356	1	1.85374e-05	0.529315	0.445	0.373	0.377143	0.756123	0.273866	0.304	0.366	1	0.756123	0.00014829
Pgap1	0.00426143	0.742211	0.456	0.49	1	1.22703e-07	0.582021	0.56	0.527	0.00249639	6.36146e-07	0.486977	0.593	0.546	0.0129424	1.53462e-08	0.730625	0.558	0.516	0.000312219	2.60729e-05	0.540187	0.502	0.519	0.530453	0.0581908	0.350746	0.445	0.488	1	1.50653e-05	0.504387	0.543	0.54	0.306504	1.45359e-05	0.59359	0.524	0.555	0.295733	0.0581908	1.2277e-07
mt-Nd4l	1.10876e-08	0.686151	0.68	0.723	0.000225578	0.00262323	0.39145	0.572	0.671	1	7.03074e-13	0.54403	0.778	0.765	1.4304e-08	4.03836e-08	0.602637	0.603	0.58	0.000821604	2.51179e-08	0.501142	0.63	0.675	0.000511025	0.0080491	0.350645	0.613	0.723	1	1.69737e-18	0.61207	0.799	0.761	3.4533e-14	0.034031	0.305789	0.581	0.731	1	0.034031	1.3579e-17
Cst3	0.0435595	0.539748	0.495	0.604	1	6.23713e-07	0.478024	0.62	0.621	0.0126894	0.0182848	0.273225	0.593	0.662	1	1.29388e-08	0.706974	0.596	0.571	0.000263241	0.331769	0.330072	0.438	0.563	1	0.193518	0.350021	0.487	0.571	1	4.26553e-06	0.448281	0.604	0.601	0.0867822	0.00104704	0.437471	0.571	0.697	1	0.331769	1.03511e-07
Hsp90b1	0.0590082	0.45049	0.505	0.661	1	0.00027506	0.351326	0.62	0.712	1	0.00114547	0.336291	0.644	0.709	1	1.47604e-05	0.581365	0.583	0.662	0.3003	0.377651	0.29344	0.479	0.644	1	0.00336472	0.348209	0.597	0.686	1	5.08589e-08	0.460088	0.695	0.734	0.00103473	0.000896519	0.42934	0.576	0.675	1	0.377651	4.06872e-07
Cadm4	0.610142	0.463673	0.311	0.385	1	0.00255606	0.512589	0.386	0.363	1	0.0240116	0.322029	0.422	0.435	1	0.827619	0.284293	0.256	0.327	1	0.15646	0.254899	0.247	0.352	1	0.333316	0.347006	0.361	0.411	1	0.00302478	0.455212	0.427	0.417	1	0.587707	0.328748	0.377	0.483	1	0.827619	0.0202665
Akap8l	0.153602	0.55042	0.33	0.353	1	0.995864	0.324158	0.337	0.437	1	0.00117483	0.405281	0.467	0.446	1	0.7725	0.280774	0.34	0.449	1	0.346605	0.448113	0.329	0.393	1	0.0621841	0.346649	0.42	0.44	1	0.00469495	0.402467	0.451	0.457	1	0.624186	0.319145	0.372	0.475	1	0.995864	0.00936007
Ctsd	0.403372	0.520943	0.369	0.471	1	0.894564	0.268018	0.361	0.463	1	0.0836326	0.36966	0.459	0.523	1	0.220298	0.492154	0.365	0.432	1	0.25136	0.255185	0.311	0.453	1	0.0394798	0.34396	0.454	0.485	1	0.249305	0.305429	0.445	0.541	1	0.381537	0.253388	0.455	0.59	1	0.894564	0.275477
Thsd7a	0.01245	0.542333	0.243	0.18	1	0.00695656	0.441959	0.259	0.205	1	0.0104273	0.412002	0.244	0.186	1	0.915254	0.257462	0.154	0.174	1	0.943571	0.352987	0.155	0.176	1	0.0230397	0.342064	0.21	0.152	1	0.305311	0.25423	0.189	0.177	1	0.8393	0.261643	0.152	0.163	1	0.943571	0.0543162
Wsb1	0.455582	0.662589	0.311	0.373	1	2.52936e-05	0.453837	0.578	0.571	0.514599	1.02709e-06	0.552288	0.578	0.503	0.0208962	2.25519e-06	0.631809	0.538	0.498	0.0458818	0.0480925	0.416341	0.438	0.505	1	0.0190248	0.339311	0.504	0.489	1	6.02495e-06	0.435269	0.555	0.515	0.122578	1.39334e-06	0.571862	0.545	0.541	0.0283476	0.455582	8.21673e-06
Snhg20	0.466834	0.37696	0.388	0.491	1	0.356391	0.324796	0.44	0.55	1	0.00340929	0.325149	0.548	0.561	1	0.00257769	0.507012	0.481	0.512	1	0.344686	0.378963	0.402	0.5	1	0.449342	0.336666	0.454	0.556	1	0.0474619	0.259501	0.47	0.517	1	1.72268e-05	0.476733	0.571	0.628	0.35048	0.466834	0.000137806
Atp6ap2	0.0226618	0.475841	0.485	0.564	1	0.00344767	0.402431	0.53	0.59	1	3.04461e-11	0.556626	0.696	0.629	6.19425e-07	0.0571305	0.445566	0.474	0.558	1	0.414912	0.282974	0.447	0.562	1	0.0734199	0.333168	0.487	0.55	1	1.71101e-05	0.492076	0.591	0.633	0.348105	0.0372713	0.408821	0.513	0.642	1	0.414912	2.43568e-10
Tspoap1	0.102543	0.620515	0.272	0.26	1	0.55594	0.27426	0.223	0.292	1	0.0205239	0.319815	0.356	0.327	1	0.737097	0.426866	0.256	0.299	1	0.496585	0.271996	0.21	0.272	1	0.30183	0.332561	0.286	0.293	1	0.0298877	0.346926	0.348	0.336	1	0.0696545	0.377346	0.372	0.405	1	0.737097	0.152869
Tmem106b	0.912322	0.417626	0.35	0.484	1	0.0240547	0.350514	0.482	0.554	1	0.000844187	0.426261	0.548	0.57	1	0.00101481	0.550038	0.481	0.511	1	0.72271	0.312203	0.397	0.518	1	0.0164347	0.322096	0.496	0.526	1	5.31778e-05	0.418173	0.567	0.594	1	0.0035983	0.391609	0.487	0.541	1	0.912322	0.000425343
Gabbr1	3.98668e-10	0.573907	0.757	0.834	8.11089e-06	2.41235e-07	0.387724	0.741	0.861	0.00490793	8.13128e-20	0.566438	0.889	0.874	1.65431e-15	1.04489e-05	0.378669	0.705	0.837	0.212583	2.52674e-08	0.400151	0.721	0.834	0.000514064	5.51127e-07	0.319335	0.798	0.862	0.0112127	1.41486e-16	0.48612	0.841	0.881	2.87854e-12	1.17564e-07	0.300976	0.796	0.896	0.00239184	1.04489e-05	6.50502e-19
Adam22	0.582849	0.509901	0.35	0.466	1	0.408424	0.357589	0.41	0.522	1	0.122675	0.343033	0.474	0.567	1	0.603581	0.337131	0.359	0.521	1	0.62589	0.333202	0.37	0.517	1	0.208508	0.317096	0.445	0.548	1	4.09293e-05	0.465778	0.549	0.569	0.832707	0.816724	0.283634	0.398	0.564	1	0.816724	0.000327388
Gm47283	1.51794e-05	0.77681	0.563	0.578	0.308825	0.000248109	0.470968	0.506	0.489	1	0.0148024	0.403148	0.385	0.363	1	0.0147605	0.560259	0.397	0.397	1	0.217492	0.411749	0.393	0.468	1	0.571095	0.315122	0.395	0.488	1	0.0318493	0.322932	0.366	0.35	1	8.37282e-13	0.77351	0.681	0.692	1.70345e-08	0.571095	6.69825e-12
Reep1	0.107601	0.687786	0.408	0.486	1	0.643251	0.310248	0.386	0.494	1	0.0069938	0.377328	0.496	0.546	1	0.117616	0.392713	0.391	0.447	1	0.217163	0.269562	0.32	0.472	1	0.142824	0.313221	0.429	0.48	1	7.48998e-06	0.464051	0.549	0.549	0.152384	0.145737	0.346314	0.461	0.579	1	0.643251	5.99183e-05
Clu	0.0213082	0.672119	0.35	0.34	1	0.434924	0.36714	0.313	0.362	1	3.99501e-05	0.478908	0.481	0.428	0.812786	0.0399066	0.587423	0.327	0.335	1	0.427981	0.410566	0.292	0.339	1	0.0233866	0.30588	0.37	0.34	1	4.67709e-06	0.532805	0.451	0.373	0.0951555	0.374915	0.284782	0.288	0.408	1	0.434924	3.74161e-05
Lmbrd2	0.873148	0.380116	0.262	0.321	1	0.497822	0.323448	0.319	0.377	1	5.29701e-08	0.569681	0.489	0.363	0.00107768	0.000111303	0.580928	0.404	0.348	1	0.186398	0.431649	0.329	0.366	1	0.592631	0.303789	0.311	0.357	1	0.0155227	0.329302	0.402	0.394	1	0.00410288	0.439372	0.408	0.407	1	0.873148	4.23761e-07
Psap	6.96635e-10	0.440063	0.816	0.86	1.4173e-05	1.08356e-09	0.371571	0.807	0.861	2.20451e-05	7.94286e-14	0.450769	0.881	0.9	1.61597e-09	1.34896e-15	0.585127	0.821	0.866	2.74445e-11	4.43264e-06	0.289298	0.735	0.862	0.0901821	2.22261e-05	0.302393	0.798	0.881	0.452189	5.90012e-19	0.50744	0.86	0.918	1.20038e-14	9.96959e-11	0.310086	0.874	0.926	2.02831e-06	2.22261e-05	4.72009e-18
Zfp950	0.963822	0.495121	0.252	0.326	1	0.626781	0.264134	0.373	0.458	1	0.25644	0.358751	0.37	0.43	1	0.699849	0.349921	0.295	0.403	1	0.268888	0.311943	0.269	0.386	1	0.199625	0.301189	0.412	0.459	1	0.0281809	0.392434	0.409	0.423	1	0.0674179	0.26279	0.204	0.318	1	0.963822	0.204421
Slc24a5	0.111753	0.480183	0.35	0.358	1	0.0144373	0.385008	0.506	0.54	1	0.29787	0.31514	0.407	0.454	1	1.77078e-06	0.518864	0.571	0.522	0.0360265	5.21721e-08	0.613991	0.557	0.534	0.00106144	0.0676389	0.297697	0.462	0.468	1	0.0745807	0.305179	0.439	0.484	1	1.6066e-06	0.61578	0.55	0.534	0.0326863	0.29787	4.17377e-07
Plxnc1	0.957357	0.59213	0.233	0.292	1	4.38546e-09	0.70569	0.488	0.392	8.92221e-05	0.181236	0.414669	0.37	0.402	1	0.0120692	0.562671	0.372	0.375	1	0.728745	0.426166	0.288	0.353	1	0.964041	0.297446	0.311	0.392	1	1.00096e-06	0.692092	0.476	0.412	0.0203645	0.254601	0.432774	0.277	0.3	1	0.964041	3.50837e-08
Prkcsh	0.884041	0.371359	0.204	0.238	1	0.195848	0.446553	0.265	0.272	1	0.174177	0.31955	0.296	0.294	1	0.622178	0.332545	0.224	0.245	1	0.498518	0.344836	0.178	0.231	1	0.625841	0.297311	0.244	0.268	1	0.0541123	0.408234	0.293	0.269	1	0.754206	0.325126	0.246	0.315	1	0.884041	0.359208
Htr2c	0.032291	0.679607	0.32	0.291	1	0.00496518	0.457811	0.343	0.29	1	0.0638518	0.477855	0.326	0.315	1	2.33255e-08	0.788773	0.436	0.301	0.000474557	0.141531	0.404397	0.32	0.331	1	0.219335	0.297185	0.311	0.301	1	0.00165799	0.531577	0.384	0.335	1	0.000206728	0.555893	0.382	0.33	1	0.219335	1.86604e-07
Nlgn3	0.0963726	0.484885	0.456	0.575	1	0.101861	0.292396	0.47	0.55	1	0.000362814	0.395173	0.578	0.584	1	0.206177	0.436391	0.41	0.504	1	0.998392	0.399283	0.384	0.521	1	0.0290904	0.294045	0.513	0.556	1	0.00151235	0.391984	0.543	0.59	1	0.0196635	0.351422	0.534	0.662	1	0.998392	0.00289883
Ndufa4	0.872011	0.489551	0.427	0.639	1	2.3506e-05	0.422068	0.645	0.715	0.478229	0.00298912	0.272995	0.659	0.726	1	0.978438	0.271751	0.455	0.643	1	0.103004	0.287522	0.525	0.669	1	0.110051	0.291823	0.622	0.739	1	0.000685398	0.328854	0.622	0.693	1	0.721249	0.26912	0.461	0.633	1	0.978438	0.000188032
Emc1	0.0134107	0.73932	0.35	0.328	1	0.0558862	0.422566	0.367	0.39	1	0.000484192	0.510395	0.459	0.417	1	0.366436	0.426232	0.301	0.338	1	0.769993	0.365286	0.288	0.346	1	0.507128	0.290435	0.353	0.4	1	0.03228	0.365171	0.39	0.397	1	0.438621	0.400556	0.33	0.399	1	0.769993	0.00386698
Pianp	0.868521	0.344829	0.437	0.652	1	0.0404051	0.279731	0.572	0.715	1	0.00211798	0.300328	0.644	0.723	1	0.00484007	0.392939	0.551	0.665	1	0.1596	0.284334	0.511	0.67	1	0.00382229	0.288876	0.647	0.732	1	3.29827e-06	0.402083	0.659	0.718	0.0671033	0.0491412	0.320853	0.534	0.676	1	0.868521	2.63859e-05
Negr1	0.0202791	0.472081	0.612	0.77	1	2.79814e-12	0.565448	0.783	0.76	5.69282e-08	2.31894e-07	0.450563	0.763	0.798	0.00471788	1.74891e-08	0.481702	0.75	0.772	0.000355815	0.0829534	0.259917	0.598	0.743	1	0.00194137	0.285857	0.689	0.749	1	7.37536e-12	0.501606	0.799	0.784	1.50052e-07	7.61898e-06	0.419188	0.649	0.744	0.155008	0.0829534	2.23851e-11
Nptn	0.63592	0.378621	0.408	0.562	1	5.97979e-05	0.289674	0.651	0.704	1	9.01655e-13	0.592838	0.756	0.729	1.83442e-08	4.75328e-07	0.552245	0.635	0.671	0.00967054	0.448913	0.25174	0.507	0.681	1	0.417672	0.276535	0.479	0.624	1	4.55565e-11	0.474306	0.72	0.731	9.26847e-07	1.32146e-05	0.425436	0.665	0.788	0.26885	0.63592	7.21324e-12
Cd81	0.50047	0.407929	0.427	0.585	1	6.05363e-07	0.430385	0.614	0.612	0.0123161	2.05999e-05	0.434185	0.644	0.662	0.419105	0.0124102	0.373897	0.494	0.574	1	0.607779	0.323261	0.429	0.571	1	0.637981	0.269525	0.471	0.608	1	3.42466e-08	0.475875	0.646	0.662	0.000696748	0.000263643	0.402581	0.592	0.708	1	0.637981	2.73973e-07
Ttc14	0.788799	0.370554	0.417	0.637	1	0.000226821	0.311826	0.675	0.762	1	0.00563712	0.288408	0.667	0.751	1	0.0106998	0.39877	0.596	0.758	1	2.68268e-07	0.495791	0.635	0.717	0.00545792	0.00667324	0.268936	0.672	0.757	1	5.41707e-09	0.435845	0.744	0.783	0.00011021	0.00295192	0.34187	0.586	0.714	1	0.788799	4.33366e-08
Tmem30a	3.32197e-07	0.706027	0.641	0.716	0.00675855	2.58906e-07	0.366192	0.717	0.755	0.00526744	2.40209e-07	0.34403	0.77	0.81	0.00488706	1.67642e-09	0.519457	0.692	0.758	3.41067e-05	6.51307e-06	0.425907	0.635	0.745	0.132508	0.0565747	0.268069	0.613	0.762	1	7.79703e-12	0.480914	0.78	0.83	1.58631e-07	8.25813e-11	0.542064	0.696	0.766	1.68012e-06	0.0565747	6.23763e-11
Plppr4	0.276387	0.497926	0.427	0.548	1	4.93506e-07	0.450266	0.627	0.634	0.0100404	9.08119e-08	0.509369	0.681	0.672	0.00184757	0.0854084	0.40518	0.532	0.667	1	0.888697	0.259544	0.434	0.578	1	0.61338	0.265976	0.454	0.586	1	0.00144373	0.419665	0.628	0.701	1	2.78668e-07	0.570345	0.623	0.678	0.0056695	0.888697	7.26495e-07
Rtl8a	1.47633e-18	0.623635	0.903	0.919	3.00359e-14	3.84893e-12	0.416548	0.861	0.893	7.83066e-08	2.45542e-11	0.386244	0.896	0.91	4.99556e-07	5.69419e-17	0.542317	0.853	0.873	1.15848e-12	1.20921e-14	0.455942	0.813	0.883	2.46014e-10	7.28976e-07	0.259629	0.84	0.891	0.014831	2.02821e-11	0.410221	0.872	0.894	4.12639e-07	1.83579e-08	0.347022	0.796	0.883	0.000373491	7.28976e-07	1.18106e-17
Fam8a1	0.00482966	0.733905	0.485	0.55	1	3.47589e-07	0.52939	0.56	0.539	0.00707171	2.17694e-06	0.486032	0.607	0.592	0.0442898	0.161978	0.347459	0.417	0.497	1	0.553315	0.368841	0.397	0.519	1	0.34376	0.258502	0.462	0.572	1	6.43314e-08	0.536142	0.61	0.594	0.00130882	4.30415e-05	0.494845	0.539	0.571	0.875679	0.553315	5.14651e-07
Plppr2	0.638799	0.474834	0.272	0.389	1	0.370419	0.332035	0.307	0.349	1	0.167364	0.385884	0.37	0.41	1	0.196313	0.265242	0.212	0.311	1	0.835946	0.431947	0.265	0.324	1	0.343429	0.257421	0.345	0.372	1	0.127741	0.358858	0.354	0.382	1	0.722767	0.412444	0.309	0.423	1	0.835946	0.664907
Tmed10	0.000662906	0.628933	0.553	0.639	1	3.47197e-05	0.518778	0.584	0.654	0.706372	8.36033e-11	0.544573	0.711	0.687	1.70091e-06	0.0098378	0.5155	0.519	0.605	1	0.012473	0.458528	0.498	0.605	1	0.142366	0.25329	0.555	0.656	1	8.06175e-07	0.421133	0.652	0.671	0.0164016	1.65157e-05	0.527856	0.571	0.667	0.336012	0.142366	6.68826e-10
Cd200	0.00484332	0.469342	0.583	0.725	1	0.000854507	0.375374	0.596	0.691	1	5.06585e-08	0.467912	0.711	0.744	0.00103065	6.28981e-05	0.453776	0.615	0.69	1	0.300812	0.291396	0.502	0.682	1	0.335356	0.250242	0.546	0.689	1	1.48669e-08	0.424095	0.72	0.765	0.000302467	8.32879e-08	0.422499	0.665	0.76	0.00169449	0.335356	1.18935e-07
Elavl3	1.626e-22	-0.87754	0.146	0.759	3.30809e-18	7.04487e-11	-0.35904	0.331	0.696	1.43328e-06	3.80924e-15	-0.540937	0.319	0.736	7.74989e-11	4.23826e-14	-0.466702	0.269	0.69	8.62274e-10	6.5078e-27	-0.598132	0.196	0.68	1.32401e-22	1.52955e-05	-0.250653	0.454	0.762	0.311188	2.37293e-15	-0.492565	0.372	0.751	4.82772e-11	8.37366e-15	-0.385796	0.277	0.694	1.70362e-10	1.52955e-05	5.20624e-26
Iscu	1.06661e-13	-0.557191	0.068	0.497	2.17001e-09	4.43189e-11	-0.304352	0.151	0.477	9.01668e-07	3.63409e-14	-0.450508	0.141	0.539	7.39356e-10	6.70377e-14	-0.391579	0.109	0.46	1.36388e-09	1.65494e-13	-0.271511	0.142	0.45	3.36698e-09	3.45842e-07	-0.250796	0.244	0.538	0.00703616	2.15319e-12	-0.310407	0.152	0.49	4.38066e-08	3.4374e-17	-0.374233	0.12	0.496	6.99338e-13	3.45842e-07	2.74992e-16
Arl3	1.50683e-11	-0.491154	0.068	0.449	3.06564e-07	6.25983e-16	-0.377898	0.096	0.475	1.27356e-11	5.25508e-11	-0.404591	0.163	0.507	1.06915e-06	1.28814e-12	-0.319843	0.128	0.474	2.62071e-08	6.0626e-17	-0.328047	0.11	0.442	1.23344e-12	5.25904e-08	-0.254595	0.202	0.519	0.00106995	2.90791e-14	-0.385474	0.122	0.477	5.91615e-10	1.01211e-17	-0.376395	0.052	0.388	2.05914e-13	5.25904e-08	8.09687e-17
1700037H04Rik	2.81229e-08	-0.277274	0.049	0.331	0.00057216	2.52946e-14	-0.406903	0.024	0.315	5.14619e-10	1.87361e-11	-0.363098	0.059	0.365	3.81186e-07	1.69203e-10	-0.334731	0.032	0.27	3.44243e-06	8.81536e-16	-0.351042	0.027	0.288	1.79348e-11	3.36764e-08	-0.258085	0.092	0.361	0.000685147	3.35331e-11	-0.259769	0.055	0.314	6.8223e-07	7.74503e-15	-0.304722	0.031	0.309	1.57573e-10	3.36764e-08	7.05229e-15
Chmp3	9.34724e-12	-0.599666	0	0.326	1.9017e-07	9.87084e-15	-0.387326	0.042	0.357	2.00822e-10	9.50486e-10	-0.339219	0.081	0.361	1.93376e-05	2.7027e-13	-0.399575	0.045	0.338	5.49865e-09	3.27516e-17	-0.358071	0.037	0.321	6.66332e-13	1.32332e-08	-0.272004	0.084	0.361	0.00026923	6.83674e-13	-0.330697	0.049	0.338	1.39093e-08	2.19001e-13	-0.323087	0.031	0.286	4.45558e-09	1.32332e-08	2.62013e-16
Rabep1	7.49689e-12	-0.348499	0.068	0.458	1.52524e-07	4.0153e-16	-0.404321	0.072	0.433	8.16912e-12	5.31182e-12	-0.329358	0.126	0.492	1.08069e-07	2.22757e-16	-0.503447	0.083	0.459	4.53199e-12	1.95092e-17	-0.357872	0.091	0.423	3.96914e-13	1.14152e-07	-0.272881	0.185	0.489	0.00232242	2.96703e-18	-0.428616	0.122	0.517	6.03642e-14	5.96739e-15	-0.296617	0.084	0.407	1.21407e-10	1.14152e-07	2.37362e-17
Rere	4.01165e-11	-0.425203	0.068	0.439	8.16171e-07	3.92375e-11	-0.275948	0.108	0.41	7.98287e-07	3.35615e-10	-0.333075	0.163	0.499	6.82809e-06	6.87723e-13	-0.286233	0.115	0.461	1.39917e-08	1.1234e-16	-0.298199	0.091	0.412	2.28556e-12	5.45146e-08	-0.273611	0.16	0.475	0.0011091	2.28007e-09	-0.26591	0.183	0.481	4.6388e-05	4.78773e-13	-0.260645	0.126	0.449	9.74063e-09	5.45146e-08	8.98722e-16
Fbxo9	3.23907e-13	-0.553991	0.058	0.467	6.58989e-09	1.58583e-16	-0.452284	0.102	0.486	3.22638e-12	9.79168e-09	-0.295035	0.207	0.532	0.000199212	2.89501e-16	-0.440257	0.103	0.497	5.88989e-12	2.06958e-20	-0.408385	0.096	0.467	4.21056e-16	8.26558e-09	-0.275719	0.235	0.588	0.000168163	2.50586e-13	-0.37111	0.189	0.552	5.09818e-09	1.14689e-14	-0.278006	0.115	0.457	2.33334e-10	9.79168e-09	1.65566e-19
Ndufs5	1.19403e-10	-0.355063	0.146	0.567	2.42925e-06	7.76651e-14	-0.361819	0.169	0.553	1.5801e-09	2.85784e-13	-0.363479	0.185	0.595	5.81427e-09	4.84708e-15	-0.396545	0.128	0.516	9.86138e-11	5.23932e-19	-0.321088	0.142	0.528	1.06594e-14	1.38063e-07	-0.275749	0.244	0.581	0.00280889	5.32502e-18	-0.416742	0.152	0.575	1.08337e-13	2.43171e-20	-0.467467	0.099	0.502	4.94731e-16	1.38063e-07	1.94536e-19
Srp9	5.28811e-12	-0.420905	0.097	0.513	1.07587e-07	1.28033e-09	-0.270245	0.205	0.528	2.60482e-05	8.777e-16	-0.453623	0.141	0.571	1.78568e-11	1.55939e-21	-0.607218	0.071	0.508	3.17257e-17	1.4825e-19	-0.347107	0.123	0.507	3.01615e-15	6.66505e-08	-0.275796	0.252	0.604	0.001356	3.02465e-15	-0.405748	0.159	0.546	6.15364e-11	2.35103e-15	-0.301919	0.131	0.496	4.78317e-11	6.66505e-08	1.24751e-20
Chchd4	1.39027e-15	-0.621711	0.107	0.602	2.8285e-11	2.54025e-13	-0.348866	0.181	0.559	5.16813e-09	1.01523e-08	-0.303728	0.296	0.636	0.000206549	8.30214e-17	-0.423483	0.128	0.556	1.68907e-12	2.90651e-16	-0.262577	0.187	0.576	5.9133e-12	4.32722e-11	-0.279249	0.261	0.668	8.80373e-07	3.99188e-16	-0.426117	0.22	0.618	8.12147e-12	2.62222e-22	-0.543023	0.131	0.574	5.33491e-18	1.01523e-08	2.09778e-21
Spryd7	5.4098e-12	-0.4979	0.039	0.404	1.10062e-07	6.89778e-15	-0.377943	0.042	0.36	1.40335e-10	8.6327e-13	-0.430413	0.081	0.425	1.75632e-08	2.35186e-15	-0.453525	0.051	0.394	4.78486e-11	4.06521e-16	-0.326458	0.073	0.372	8.27066e-12	4.24211e-10	-0.282103	0.092	0.41	8.63057e-06	5.04e-18	-0.486014	0.055	0.424	1.02539e-13	9.66103e-13	-0.252739	0.084	0.373	1.96554e-08	4.24211e-10	4.032e-17
Aldoa	5.30287e-11	-0.411263	0.214	0.683	1.07887e-06	8.21209e-17	-0.507406	0.199	0.615	1.67075e-12	4.02215e-13	-0.4382	0.319	0.708	8.18305e-09	1.37961e-13	-0.252139	0.192	0.605	2.80681e-09	5.32809e-23	-0.507562	0.183	0.633	1.084e-18	4.38605e-08	-0.284674	0.319	0.683	0.000892342	2.15893e-20	-0.5946	0.22	0.668	4.39234e-16	3.17954e-10	-0.26893	0.283	0.644	6.46878e-06	4.38605e-08	4.26247e-22
Rab7	2.60163e-17	-0.664512	0.078	0.586	5.29302e-13	3.17413e-15	-0.375384	0.102	0.476	6.45776e-11	1.17909e-13	-0.432636	0.178	0.574	2.39886e-09	1.9272e-12	-0.273805	0.128	0.482	3.92088e-08	2.76628e-22	-0.491763	0.096	0.474	5.628e-18	3.06226e-09	-0.289474	0.21	0.562	6.23018e-05	2.98278e-11	-0.283145	0.207	0.551	6.06847e-07	3.37499e-17	-0.386246	0.141	0.531	6.86641e-13	3.06226e-09	2.21303e-21
Rasgrp1	1.92796e-07	-0.417083	0.068	0.339	0.00392244	2.73267e-05	-0.250877	0.139	0.311	0.555962	1.60477e-08	-0.421242	0.096	0.351	0.00032649	1.51062e-09	-0.486075	0.045	0.273	3.07337e-05	2.24577e-11	-0.412656	0.073	0.3	4.56902e-07	1.81663e-05	-0.290293	0.126	0.33	0.369594	4.21452e-08	-0.400811	0.116	0.34	0.000857444	5.01969e-15	-0.534378	0.063	0.361	1.02126e-10	2.73267e-05	4.01575e-14
Cend1	1.23098e-10	-0.441723	0.107	0.495	2.50442e-06	6.28797e-12	-0.296521	0.127	0.45	1.27929e-07	1.70134e-13	-0.470971	0.17	0.551	3.46137e-09	2.68588e-11	-0.295423	0.141	0.466	5.46442e-07	1.34811e-22	-0.519035	0.096	0.486	2.74273e-18	1.07965e-08	-0.290902	0.21	0.539	0.000219654	4.75148e-16	-0.536244	0.14	0.511	9.6669e-12	1.12319e-20	-0.514445	0.147	0.563	2.28512e-16	1.07965e-08	1.07849e-21
Celf4	2.71718e-12	-0.443957	0.709	0.924	5.5281e-08	4.63121e-17	-0.482357	0.639	0.848	9.42221e-13	2.63839e-11	-0.330185	0.83	0.903	5.36781e-07	1.44693e-16	-0.455272	0.609	0.868	2.94378e-12	3.46849e-18	-0.410672	0.653	0.864	7.05664e-14	9.6447e-08	-0.296399	0.815	0.913	0.00196222	5.26727e-18	-0.447465	0.78	0.899	1.07163e-13	2.11243e-11	-0.32864	0.775	0.888	4.29773e-07	9.6447e-08	2.77479e-17
Rab11b	1.21952e-09	-0.251543	0.107	0.48	2.48112e-05	5.57617e-14	-0.354131	0.096	0.443	1.13447e-09	5.33964e-11	-0.394297	0.17	0.511	1.08635e-06	5.19553e-18	-0.436405	0.058	0.443	1.05703e-13	1.63906e-15	-0.258574	0.105	0.427	3.33467e-11	1.13266e-09	-0.296402	0.16	0.514	2.30439e-05	8.94235e-13	-0.326946	0.146	0.494	1.81932e-08	1.69536e-14	-0.341002	0.131	0.474	3.4492e-10	1.21952e-09	4.15643e-17
Med28	2.91987e-10	-0.354181	0.136	0.541	5.94048e-06	5.98737e-16	-0.401346	0.157	0.563	1.21813e-11	2.52263e-07	-0.265824	0.289	0.616	0.0051323	8.17269e-13	-0.268624	0.167	0.55	1.66273e-08	7.5296e-18	-0.309055	0.164	0.553	1.5319e-13	9.16258e-09	-0.297957	0.235	0.597	0.000186413	1.51866e-17	-0.484714	0.171	0.582	3.08972e-13	1.13116e-15	-0.306137	0.094	0.433	2.30135e-11	2.52263e-07	6.02368e-17
Tppp	1.81021e-08	-0.285003	0.165	0.541	0.000368288	1.76454e-14	-0.396838	0.114	0.476	3.58995e-10	6.60007e-08	-0.289639	0.252	0.575	0.00134278	1.60309e-18	-0.541423	0.096	0.518	3.26149e-14	3.29486e-15	-0.250607	0.151	0.495	6.7034e-11	6.61195e-08	-0.298167	0.227	0.565	0.0013452	2.61354e-15	-0.470641	0.207	0.584	5.31725e-11	2.68716e-17	-0.431528	0.147	0.544	5.46703e-13	6.61195e-08	1.28247e-17
Cplx2	3.14954e-08	-0.346814	0.087	0.395	0.000640775	9.00228e-09	-0.325761	0.108	0.355	0.000183151	9.32611e-08	-0.360438	0.156	0.416	0.0018974	6.32943e-16	-0.606043	0.058	0.407	1.28772e-11	1.2352e-19	-0.544759	0.082	0.42	2.51301e-15	3.6282e-07	-0.298438	0.143	0.414	0.00738157	9.01833e-13	-0.497834	0.091	0.387	1.83478e-08	3.48533e-12	-0.459955	0.173	0.483	7.0909e-08	3.6282e-07	9.8816e-19
Wdr6	3.01929e-16	-0.65003	0.165	0.71	6.14274e-12	4.31367e-17	-0.531581	0.211	0.63	8.77617e-13	1.10947e-10	-0.406205	0.378	0.743	2.25721e-06	3.30484e-22	-0.650507	0.179	0.673	6.7237e-18	4.64568e-19	-0.438619	0.215	0.631	9.45163e-15	2.27712e-06	-0.302402	0.42	0.722	0.046328	2.91079e-15	-0.448025	0.329	0.696	5.922e-11	2.56281e-11	-0.317732	0.319	0.69	5.21403e-07	2.27712e-06	2.64387e-21
Phyhip	1.27548e-08	-0.366958	0.049	0.338	0.000259497	4.67185e-13	-0.374011	0.03	0.306	9.50487e-09	3.12008e-10	-0.343268	0.089	0.379	6.3478e-06	1.98125e-14	-0.484141	0.032	0.337	4.03086e-10	1.34637e-12	-0.251087	0.078	0.33	2.7392e-08	2.16339e-08	-0.30257	0.109	0.39	0.000440142	4.44896e-12	-0.349594	0.098	0.399	9.0514e-08	1.41152e-14	-0.340579	0.058	0.353	2.87174e-10	2.16339e-08	1.12922e-13
Ube2ql1	3.51677e-08	-0.375815	0.029	0.291	0.000715487	6.69566e-10	-0.2718	0.036	0.26	1.36223e-05	4.65296e-09	-0.33028	0.074	0.332	9.46645e-05	8.77551e-13	-0.433444	0.019	0.292	1.78538e-08	7.5082e-15	-0.362463	0.032	0.281	1.52754e-10	1.41756e-07	-0.308242	0.092	0.342	0.00288402	8.10709e-12	-0.392043	0.061	0.325	1.64939e-07	1.987e-14	-0.355622	0.042	0.322	4.04254e-10	1.41756e-07	6.00656e-14
Serbp1	4.04274e-16	-0.522587	0.117	0.641	8.22495e-12	5.46967e-13	-0.399788	0.211	0.59	1.1128e-08	9.49642e-19	-0.61707	0.207	0.661	1.93205e-14	7.06507e-18	-0.446113	0.16	0.616	1.43739e-13	1.66545e-22	-0.468822	0.155	0.589	3.38836e-18	6.89272e-08	-0.309314	0.319	0.649	0.00140232	2.99486e-16	-0.440699	0.226	0.644	6.09304e-12	4.04088e-19	-0.436606	0.168	0.591	8.22117e-15	6.89272e-08	1.33236e-21
Epm2aip1	2.51229e-13	-0.532601	0.165	0.646	5.11125e-09	6.34824e-11	-0.269593	0.217	0.577	1.29155e-06	1.05758e-07	-0.285252	0.333	0.66	0.00215165	3.75931e-13	-0.357029	0.199	0.605	7.64832e-09	2.69456e-13	-0.282714	0.233	0.591	5.48208e-09	3.92347e-08	-0.314109	0.294	0.642	0.000798229	1.03659e-10	-0.314057	0.317	0.665	2.10894e-06	6.25586e-13	-0.286196	0.236	0.619	1.27275e-08	1.05758e-07	2.00983e-12
Rab5a	3.31052e-12	-0.476833	0.097	0.516	6.73525e-08	1.11541e-14	-0.408494	0.108	0.463	2.26931e-10	7.39157e-13	-0.451178	0.148	0.514	1.50381e-08	1.59821e-15	-0.381165	0.096	0.473	3.25156e-11	2.56425e-17	-0.302894	0.114	0.465	5.21696e-13	3.24358e-08	-0.317704	0.193	0.517	0.000659907	8.5846e-17	-0.45981	0.152	0.531	1.74654e-12	2.01402e-21	-0.47877	0.079	0.482	4.09753e-17	3.24358e-08	1.61122e-20
Cplx1	2.80854e-06	-0.499675	0.029	0.231	0.0571397	2.14071e-08	-0.410465	0.03	0.216	0.000435527	9.67892e-06	-0.417997	0.089	0.262	0.196918	3.33065e-08	-0.412136	0.051	0.256	0.000677621	6.03893e-12	-0.462652	0.068	0.3	1.22862e-07	0.000305728	-0.318924	0.134	0.296	1	8.07169e-07	-0.322709	0.091	0.276	0.0164219	9.00385e-09	-0.351281	0.11	0.334	0.000183183	0.000305728	4.83114e-11
Nars	5.60977e-10	-0.325924	0.087	0.449	1.14131e-05	2.76419e-13	-0.350332	0.108	0.444	5.62375e-09	3.40287e-09	-0.319391	0.17	0.478	6.92315e-05	3.71009e-14	-0.358253	0.09	0.443	7.54819e-10	1.99823e-15	-0.287006	0.119	0.447	4.0654e-11	2.57738e-09	-0.321367	0.168	0.52	5.24367e-05	4.34225e-13	-0.335921	0.159	0.518	8.8343e-09	1.75662e-18	-0.386121	0.089	0.464	3.57385e-14	3.40287e-09	1.4053e-17
Amph	5.55102e-12	-0.500865	0.019	0.369	1.12936e-07	2.18818e-14	-0.422816	0.048	0.358	4.45186e-10	3.59288e-11	-0.345051	0.081	0.399	7.30972e-07	5.07417e-17	-0.546506	0.032	0.384	1.03234e-12	6.40646e-16	-0.298876	0.068	0.357	1.30339e-11	3.10377e-10	-0.323691	0.101	0.418	6.31462e-06	2.02237e-13	-0.3712	0.098	0.422	4.11452e-09	6.60081e-14	-0.257952	0.073	0.373	1.34293e-09	3.10377e-10	4.05934e-16
Cyfip2	2.49768e-08	-0.313109	0.214	0.619	0.000508153	3.93044e-12	-0.378506	0.223	0.579	7.99649e-08	2.82041e-09	-0.345629	0.333	0.674	5.73812e-05	1.64636e-16	-0.411798	0.179	0.618	3.34952e-12	1.35882e-25	-0.588722	0.155	0.598	2.76451e-21	3.54458e-07	-0.32482	0.345	0.686	0.00721144	3.49079e-09	-0.326321	0.348	0.66	7.10201e-05	2.72825e-11	-0.257615	0.257	0.624	5.55062e-07	3.54458e-07	1.08705e-24
Ctxn2	1.83144e-09	-0.383203	0.146	0.528	3.72607e-05	1.64792e-10	-0.315918	0.163	0.477	3.35269e-06	2.10646e-08	-0.291294	0.252	0.567	0.00042856	6.95629e-17	-0.538813	0.135	0.549	1.41526e-12	1.06102e-13	-0.341035	0.183	0.513	2.15865e-09	6.89642e-08	-0.325537	0.269	0.598	0.00140308	1.9672e-17	-0.562559	0.171	0.568	4.00227e-13	9.15339e-22	-0.542016	0.099	0.515	1.86226e-17	6.89642e-08	7.32271e-21
Kif21a	6.10526e-17	-0.650751	0.117	0.641	1.24212e-12	1.83051e-14	-0.448762	0.193	0.595	3.72417e-10	5.84866e-07	-0.295835	0.356	0.672	0.0118991	2.60389e-12	-0.297118	0.231	0.642	5.29761e-08	1.01974e-24	-0.52491	0.16	0.604	2.07466e-20	3.38264e-08	-0.326169	0.277	0.624	0.000688199	1.6137e-13	-0.416496	0.28	0.666	3.28308e-09	1.40108e-13	-0.257473	0.204	0.586	2.85051e-09	5.84866e-07	8.15792e-24
Atp5g3	2.01116e-11	-0.441385	0.126	0.537	4.09171e-07	3.02057e-12	-0.337071	0.151	0.498	6.14535e-08	5.76732e-12	-0.407365	0.193	0.575	1.17336e-07	8.50966e-21	-0.601284	0.077	0.512	1.73129e-16	2.73239e-20	-0.390239	0.123	0.509	5.55904e-16	7.84732e-10	-0.327776	0.202	0.577	1.59654e-05	7.26777e-15	-0.365301	0.159	0.537	1.47863e-10	1.93411e-13	-0.286944	0.152	0.491	3.93494e-09	7.84732e-10	6.80773e-20
Eif4h	9.64719e-12	-0.401148	0.136	0.579	1.96272e-07	3.73691e-15	-0.388737	0.127	0.507	7.60275e-11	4.02748e-08	-0.282348	0.259	0.586	0.000819391	1.03275e-15	-0.436084	0.122	0.519	2.10112e-11	7.54738e-20	-0.378513	0.123	0.497	1.53551e-15	8.49701e-10	-0.329356	0.218	0.591	1.72872e-05	9.13109e-12	-0.303483	0.22	0.576	1.85772e-07	1.51215e-18	-0.405067	0.136	0.542	3.07646e-14	4.02748e-08	6.0379e-19
Tuba1a	2.8862e-11	-0.489727	0.233	0.699	5.87197e-07	3.8764e-15	-0.438253	0.229	0.636	7.88653e-11	1.75692e-09	-0.355073	0.356	0.694	3.57446e-05	1.42893e-14	-0.422284	0.205	0.623	2.90716e-10	1.43211e-14	-0.330695	0.233	0.604	2.91362e-10	1.41955e-07	-0.331429	0.353	0.682	0.00288808	6.38421e-11	-0.368034	0.341	0.674	1.29887e-06	2.96579e-17	-0.339836	0.194	0.618	6.03389e-13	1.41955e-07	2.37263e-16
Akr1a1	8.53118e-12	-0.452018	0.194	0.666	1.73567e-07	2.61092e-16	-0.446414	0.187	0.612	5.31191e-12	3.81166e-17	-0.573841	0.252	0.686	7.75483e-13	7.78212e-21	-0.577946	0.147	0.619	1.58327e-16	1.97937e-19	-0.437911	0.192	0.598	4.02702e-15	1.26705e-08	-0.334302	0.361	0.704	0.000257781	4.06554e-17	-0.480079	0.244	0.655	8.27135e-13	1.14868e-16	-0.408939	0.178	0.58	2.33699e-12	1.26705e-08	6.22569e-20
Pcbp1	6.05413e-11	-0.287892	0.087	0.473	1.23171e-06	1.03244e-14	-0.384662	0.072	0.409	2.10051e-10	3.52414e-08	-0.264073	0.17	0.467	0.000716986	5.79206e-13	-0.342204	0.096	0.435	1.17839e-08	5.63854e-19	-0.384569	0.073	0.405	1.14716e-14	5.09829e-10	-0.335162	0.109	0.439	1.03725e-05	5.67793e-15	-0.40033	0.11	0.457	1.15517e-10	2.16893e-19	-0.444758	0.073	0.447	4.4127e-15	3.52414e-08	1.73515e-18
Ube2s	2.64598e-09	-0.257948	0.155	0.555	5.38325e-05	8.24041e-12	-0.326148	0.145	0.48	1.67651e-07	5.47746e-16	-0.452567	0.126	0.545	1.11439e-11	1.8405e-16	-0.426959	0.077	0.453	3.7445e-12	5.80687e-18	-0.364174	0.11	0.467	1.18141e-13	4.74495e-09	-0.337425	0.235	0.598	9.6536e-05	1.01587e-18	-0.502111	0.104	0.504	2.06679e-14	8.42581e-15	-0.266189	0.147	0.514	1.71423e-10	4.74495e-09	8.12697e-18
Hmgn1	5.45506e-25	-1.02139	0.078	0.7	1.10983e-20	2.35385e-22	-0.681417	0.163	0.638	4.7889e-18	3.68274e-18	-0.607636	0.222	0.686	7.49254e-14	1.23418e-17	-0.519241	0.173	0.627	2.51095e-13	9.04701e-18	-0.317177	0.196	0.604	1.84061e-13	2.38829e-11	-0.338295	0.277	0.682	4.85898e-07	1.42919e-17	-0.468179	0.226	0.658	2.90769e-13	1.59619e-15	-0.324722	0.188	0.584	3.24745e-11	2.38829e-11	4.36405e-24
Fkbp1a	1.66629e-09	-0.395668	0.301	0.77	3.39007e-05	9.18039e-14	-0.424649	0.295	0.688	1.86775e-09	8.5906e-08	-0.354656	0.459	0.756	0.00174776	1.01872e-12	-0.412151	0.276	0.684	2.07258e-08	1.13572e-20	-0.44595	0.247	0.671	2.31063e-16	5.95618e-09	-0.338718	0.387	0.741	0.000121179	1.91433e-16	-0.460792	0.329	0.743	3.8947e-12	5.46937e-11	-0.2787	0.325	0.704	1.11274e-06	8.5906e-08	9.08577e-20
Gabarap	5.11456e-13	-0.434118	0.117	0.572	1.04056e-08	7.61656e-17	-0.44011	0.133	0.543	1.54959e-12	6.20848e-12	-0.392045	0.259	0.64	1.26311e-07	9.76587e-13	-0.302611	0.16	0.538	1.98687e-08	1.70173e-21	-0.424282	0.128	0.536	3.46217e-17	1.67818e-09	-0.342628	0.261	0.629	3.41426e-05	1.76547e-18	-0.49582	0.152	0.566	3.59185e-14	5.38692e-15	-0.332791	0.173	0.547	1.09597e-10	1.67818e-09	1.36139e-20
Pitpnc1	9.1083e-11	-0.549521	0.029	0.357	1.85308e-06	6.95107e-12	-0.406326	0.06	0.336	1.4142e-07	5.71647e-07	-0.27048	0.111	0.342	0.0116302	5.13967e-10	-0.315947	0.058	0.303	1.04567e-05	3.62841e-13	-0.326439	0.064	0.315	7.382e-09	1.66166e-07	-0.342959	0.118	0.372	0.00338065	1.71452e-09	-0.316579	0.116	0.374	3.48818e-05	9.27626e-14	-0.372508	0.068	0.356	1.88726e-09	5.71647e-07	7.42101e-13
Ubqln2	5.22876e-11	-0.348721	0.136	0.558	1.06379e-06	2.13158e-17	-0.464715	0.108	0.507	4.3367e-13	1.9558e-15	-0.506737	0.17	0.598	3.97908e-11	2.23523e-13	-0.330048	0.128	0.497	4.54758e-09	1.69819e-22	-0.417732	0.1	0.502	3.45498e-18	2.06863e-09	-0.344409	0.21	0.555	4.20864e-05	6.14566e-14	-0.367116	0.201	0.578	1.25033e-09	2.64072e-19	-0.500355	0.115	0.512	5.37255e-15	2.06863e-09	1.35856e-21
1810037I17Rik	1.09597e-11	-0.431754	0.117	0.538	2.22975e-07	1.36051e-16	-0.395583	0.139	0.56	2.76795e-12	9.44639e-15	-0.511033	0.193	0.61	1.92187e-10	2.10853e-12	-0.250668	0.173	0.55	4.2898e-08	2.66557e-17	-0.25629	0.151	0.529	5.42311e-13	1.76903e-10	-0.354712	0.185	0.564	3.59909e-06	1.33391e-16	-0.407799	0.177	0.583	2.71383e-12	4.86305e-15	-0.318707	0.12	0.469	9.89388e-11	1.76903e-10	2.13246e-16
Nap1l1	4.76167e-12	-0.385582	0.165	0.63	9.68763e-08	1.72919e-12	-0.356086	0.223	0.607	3.51803e-08	7.21432e-08	-0.317493	0.363	0.677	0.00146775	2.04884e-09	-0.283636	0.269	0.634	4.16836e-05	6.91848e-19	-0.363146	0.183	0.597	1.40756e-14	1.51734e-09	-0.355021	0.286	0.67	3.08703e-05	1.3356e-12	-0.388531	0.268	0.635	2.71728e-08	9.26444e-23	-0.571369	0.136	0.581	1.88485e-18	7.21432e-08	7.41155e-22
Kifap3	8.18788e-14	-0.573072	0.126	0.603	1.66582e-09	2.37519e-13	-0.398035	0.187	0.564	4.83232e-09	3.69747e-09	-0.343766	0.311	0.642	7.5225e-05	5.6131e-13	-0.358681	0.224	0.633	1.14199e-08	5.91357e-23	-0.43073	0.151	0.577	1.20312e-18	2.06273e-08	-0.361534	0.286	0.627	0.000419662	3.97057e-10	-0.320592	0.323	0.659	8.07813e-06	4.46604e-15	-0.315246	0.194	0.582	9.08615e-11	2.06273e-08	4.73085e-22
Gnao1	5.50581e-12	-0.533647	0.32	0.793	1.12016e-07	9.80176e-16	-0.512893	0.295	0.706	1.99417e-11	6.30347e-11	-0.39948	0.489	0.787	1.28244e-06	6.08676e-20	-0.61942	0.263	0.736	1.23835e-15	8.64594e-20	-0.476747	0.283	0.706	1.75902e-15	4.59454e-08	-0.361721	0.487	0.771	0.000934759	4.49217e-15	-0.455283	0.433	0.778	9.13931e-11	2.73553e-18	-0.524716	0.293	0.726	5.56543e-14	4.59454e-08	4.86941e-19
Sec61b	2.52272e-09	-0.295995	0.117	0.483	5.13247e-05	7.20724e-15	-0.390937	0.096	0.451	1.46631e-10	7.48381e-15	-0.501129	0.104	0.493	1.52258e-10	5.96532e-18	-0.541081	0.064	0.452	1.21365e-13	3.4419e-19	-0.400528	0.078	0.415	7.00254e-15	2.508e-11	-0.365018	0.134	0.495	5.10252e-07	6.94597e-20	-0.55087	0.104	0.51	1.41316e-15	1.22613e-18	-0.446491	0.068	0.426	2.49456e-14	2.52272e-09	5.55678e-19
Purb	2.72233e-13	-0.549167	0.184	0.674	5.53859e-09	5.11985e-12	-0.374839	0.229	0.607	1.04163e-07	1.55643e-09	-0.366245	0.311	0.673	3.16657e-05	1.22668e-13	-0.377166	0.231	0.655	2.49569e-09	2.87025e-21	-0.468594	0.205	0.624	5.83953e-17	7.14027e-08	-0.366782	0.336	0.691	0.00145269	2.29618e-12	-0.423396	0.341	0.708	4.67158e-08	1.13617e-29	-0.749666	0.188	0.697	2.31154e-25	7.14027e-08	9.08937e-29
Rab6b	5.43701e-11	-0.452327	0.194	0.639	1.10616e-06	5.18927e-19	-0.549131	0.151	0.583	1.05576e-14	1.02879e-13	-0.504166	0.267	0.664	2.09308e-09	6.85236e-20	-0.647147	0.16	0.612	1.39411e-15	1.86019e-19	-0.422324	0.178	0.587	3.78456e-15	7.21524e-09	-0.367039	0.328	0.68	0.000146794	6.22309e-18	-0.529288	0.262	0.684	1.26609e-13	6.90054e-27	-0.66879	0.147	0.632	1.40392e-22	7.21524e-09	5.52044e-26
St13	2.41553e-12	-0.468874	0.184	0.661	4.91439e-08	1.89564e-13	-0.470965	0.217	0.591	3.85668e-09	2.75223e-14	-0.536702	0.222	0.622	5.59942e-10	9.17884e-15	-0.483073	0.205	0.621	1.86743e-10	3.12571e-22	-0.467994	0.183	0.609	6.35926e-18	1.78512e-08	-0.367574	0.328	0.664	0.000363182	6.10614e-18	-0.503916	0.244	0.663	1.24229e-13	2.68216e-14	-0.443137	0.288	0.674	5.45686e-10	1.78512e-08	2.50057e-21
Rplp0	1.17595e-12	-0.54611	0.243	0.742	2.39246e-08	5.24783e-17	-0.498145	0.241	0.67	1.06767e-12	6.04311e-11	-0.432684	0.43	0.767	1.22947e-06	7.75832e-13	-0.397127	0.263	0.684	1.57843e-08	6.22182e-19	-0.443923	0.242	0.666	1.26583e-14	2.51081e-08	-0.37161	0.395	0.747	0.000510825	4.60626e-19	-0.531792	0.28	0.714	9.37143e-15	2.93716e-20	-0.555647	0.225	0.667	5.97564e-16	2.51081e-08	2.34972e-19
Sult4a1	1.88757e-17	-0.773069	0.049	0.531	3.84026e-13	1.38404e-11	-0.277241	0.145	0.476	2.81584e-07	7.9587e-12	-0.428387	0.207	0.568	1.6192e-07	3.93556e-12	-0.331913	0.135	0.477	8.0069e-08	4.31826e-20	-0.411413	0.11	0.477	8.78549e-16	1.56936e-10	-0.37273	0.21	0.566	3.19287e-06	4.64193e-15	-0.437267	0.171	0.556	9.44401e-11	1.58844e-18	-0.519217	0.162	0.556	3.23168e-14	1.56936e-10	3.4546e-19
Got1	8.23546e-10	-0.479164	0.058	0.384	1.6755e-05	2.16685e-16	-0.437792	0.03	0.361	4.40846e-12	1.93071e-10	-0.418989	0.133	0.448	3.92803e-06	1.44767e-12	-0.377903	0.077	0.381	2.94529e-08	1.64503e-17	-0.413455	0.073	0.389	3.34682e-13	1.78701e-09	-0.372903	0.151	0.467	3.63567e-05	3.0562e-17	-0.51807	0.11	0.483	6.21783e-13	3.31863e-14	-0.391698	0.12	0.447	6.75175e-10	1.78701e-09	1.31603e-16
Atp5c1	2.07766e-13	-0.514646	0.049	0.457	4.227e-09	2.13071e-13	-0.319337	0.102	0.441	4.33493e-09	1.14082e-10	-0.357774	0.178	0.525	2.32099e-06	2.99058e-15	-0.37226	0.077	0.443	6.08434e-11	8.12583e-19	-0.360985	0.087	0.433	1.6532e-14	1.4908e-10	-0.376531	0.168	0.52	3.03304e-06	3.9378e-20	-0.537063	0.073	0.475	8.01146e-16	4.28784e-14	-0.292068	0.115	0.442	8.72361e-10	1.4908e-10	3.15024e-19
Bri3	2.51279e-09	-0.281797	0.155	0.555	5.11227e-05	3.18913e-11	-0.302916	0.175	0.523	6.48829e-07	1.36621e-08	-0.251602	0.244	0.58	0.000277956	2.60626e-20	-0.524868	0.083	0.514	5.30244e-16	2.14154e-18	-0.332664	0.119	0.481	4.35695e-14	6.82039e-12	-0.377621	0.185	0.585	1.38761e-07	2.55687e-23	-0.586147	0.098	0.556	5.20195e-19	1.49885e-20	-0.374914	0.11	0.531	3.04942e-16	1.36621e-08	2.0455e-22
Hsp90ab1	7.32813e-10	-0.438439	0.515	0.877	1.49091e-05	4.21914e-17	-0.510274	0.53	0.814	8.58384e-13	5.06776e-13	-0.382688	0.719	0.886	1.03104e-08	2.73886e-22	-0.633478	0.481	0.831	5.57221e-18	4.50691e-21	-0.503257	0.484	0.818	9.1693e-17	8.12378e-09	-0.377856	0.63	0.851	0.000165278	1.31457e-23	-0.61083	0.549	0.87	2.6745e-19	1.06969e-28	-0.713009	0.398	0.814	2.17628e-24	8.12378e-09	8.55749e-28
Pithd1	4.79789e-10	-0.469605	0.039	0.358	9.76132e-06	1.64754e-10	-0.252589	0.09	0.365	3.35191e-06	3.89861e-10	-0.361384	0.111	0.413	7.93172e-06	6.54318e-14	-0.411013	0.045	0.355	1.33121e-09	2.39058e-15	-0.289698	0.059	0.333	4.86364e-11	4.62474e-10	-0.379365	0.101	0.416	9.40903e-06	2.0536e-15	-0.437892	0.061	0.39	4.17805e-11	1.10855e-14	-0.32266	0.063	0.361	2.25534e-10	4.79789e-10	1.64288e-14
Cct5	8.15544e-09	-0.350954	0.068	0.38	0.000165922	1.35616e-12	-0.294297	0.096	0.422	2.75911e-08	4.32773e-11	-0.28658	0.133	0.478	8.80476e-07	1.07384e-15	-0.441316	0.071	0.423	2.18473e-11	8.83615e-21	-0.432265	0.059	0.409	1.79771e-16	7.4789e-11	-0.387548	0.143	0.492	1.52158e-06	1.41624e-11	-0.358057	0.128	0.43	2.88134e-07	4.04049e-14	-0.356668	0.058	0.343	8.22038e-10	8.15544e-09	7.06892e-20
Elavl4	1.4971e-11	-0.362694	0.146	0.591	3.04585e-07	1.32897e-14	-0.498314	0.193	0.573	2.70379e-10	1.22943e-12	-0.437063	0.244	0.64	2.50127e-08	2.53113e-18	-0.564276	0.167	0.619	5.14959e-14	5.98235e-22	-0.526122	0.169	0.583	1.21711e-17	4.82492e-09	-0.393297	0.286	0.608	9.81631e-05	1.98662e-13	-0.427196	0.274	0.642	4.04178e-09	3.05534e-18	-0.415102	0.178	0.596	6.21608e-14	4.82492e-09	4.78588e-21
Rnf220	1.41145e-13	-0.567822	0.087	0.527	2.87159e-09	1.2448e-19	-0.519412	0.06	0.462	2.53255e-15	1.54726e-10	-0.332526	0.17	0.525	3.1479e-06	3.77992e-17	-0.474871	0.096	0.497	7.69025e-13	1.36906e-19	-0.317179	0.105	0.472	2.78535e-15	1.55265e-12	-0.394021	0.143	0.535	3.15887e-08	7.18702e-24	-0.663356	0.091	0.535	1.4622e-19	5.47504e-14	-0.267043	0.136	0.478	1.1139e-09	1.54726e-10	5.74961e-23
Grb2	6.06773e-16	-0.70263	0.029	0.47	1.23448e-11	1.01063e-13	-0.352188	0.12	0.471	2.05613e-09	4.26183e-13	-0.447419	0.148	0.533	8.67069e-09	2.7572e-19	-0.540661	0.071	0.477	5.60953e-15	4.78374e-23	-0.44617	0.073	0.453	9.73252e-19	1.92021e-12	-0.395107	0.168	0.56	3.90667e-08	1.01239e-14	-0.390104	0.159	0.528	2.05972e-10	7.46232e-16	-0.287896	0.099	0.449	1.51821e-11	1.92021e-12	3.82699e-22
Mrfap1	4.31012e-18	-0.747544	0.32	0.849	8.76894e-14	9.14854e-24	-0.685777	0.386	0.787	1.86127e-19	1.41665e-13	-0.476196	0.563	0.839	2.88217e-09	2.94372e-15	-0.523698	0.404	0.769	5.98899e-11	1.68757e-24	-0.586777	0.324	0.756	3.43335e-20	6.47826e-12	-0.395144	0.521	0.84	1.318e-07	6.12167e-27	-0.677966	0.415	0.82	1.24545e-22	9.98054e-31	-0.765546	0.236	0.744	2.03054e-26	6.47826e-12	7.98443e-30
Atp6v1c1	7.27723e-13	-0.450915	0.117	0.566	1.48055e-08	3.3312e-15	-0.43203	0.114	0.485	6.77734e-11	4.47414e-08	-0.264305	0.244	0.57	0.000910264	1.276e-20	-0.55524	0.09	0.539	2.59602e-16	4.98285e-22	-0.432709	0.114	0.51	1.01376e-17	6.331e-10	-0.395688	0.21	0.557	1.28804e-05	1.99797e-12	-0.303481	0.207	0.557	4.06488e-08	3.10251e-19	-0.384339	0.12	0.534	6.31206e-15	4.47414e-08	3.98628e-21
Nudt3	1.45115e-09	-0.27636	0.155	0.56	2.95237e-05	1.58485e-20	-0.558023	0.096	0.527	3.22438e-16	4.25304e-11	-0.413901	0.244	0.599	8.65281e-07	2.77555e-21	-0.608385	0.083	0.532	5.64686e-17	1.26515e-20	-0.476525	0.128	0.507	2.57395e-16	1.0139e-09	-0.39612	0.218	0.568	2.06279e-05	7.14105e-18	-0.522133	0.183	0.594	1.45285e-13	5.93287e-16	-0.317971	0.147	0.531	1.20704e-11	1.45115e-09	2.22044e-20
Lsm6	7.34556e-10	-0.329251	0.097	0.463	1.49446e-05	1.14128e-15	-0.406615	0.102	0.475	2.32194e-11	7.49866e-11	-0.380601	0.185	0.534	1.5256e-06	5.99898e-12	-0.28136	0.141	0.495	1.22049e-07	1.39801e-18	-0.302334	0.11	0.476	2.84425e-14	8.44054e-12	-0.397062	0.16	0.532	1.71723e-07	1.01363e-14	-0.351981	0.146	0.52	2.06223e-10	3.23056e-17	-0.441358	0.073	0.415	6.57257e-13	7.34556e-10	1.11841e-17
Zic4	0.000157411	-0.291274	0.01	0.142	1	6.7911e-07	-0.319389	0.012	0.154	0.0138165	9.45382e-05	-0.264382	0.007	0.116	1	2.46334e-05	-0.2645	0.013	0.128	0.501167	3.88313e-07	-0.270058	0.009	0.123	0.00790022	8.04461e-07	-0.398596	0.008	0.188	0.0163668	1.62245e-07	-0.331072	0.006	0.157	0.00330088	3.89787e-08	-0.321316	0.01	0.158	0.000793021	0.000157411	3.11829e-07
Cox7a2	9.9333e-08	-0.266503	0.262	0.687	0.00202093	1.58375e-15	-0.434542	0.265	0.687	3.22215e-11	4.0439e-10	-0.356698	0.356	0.727	8.22731e-06	1.40268e-12	-0.28706	0.237	0.651	2.85375e-08	1.35103e-12	-0.262508	0.274	0.658	2.74867e-08	2.42574e-09	-0.398698	0.361	0.712	4.93516e-05	2.52554e-16	-0.431333	0.262	0.694	5.13821e-12	2.77081e-18	-0.419385	0.215	0.663	5.63722e-14	9.9333e-08	2.21665e-17
Rps2	5.93926e-07	-0.335053	0.544	0.892	0.0120834	1.14584e-07	-0.270513	0.711	0.864	0.00233122	1.9863e-12	-0.392719	0.793	0.914	4.04113e-08	3.7682e-14	-0.430698	0.615	0.855	7.66639e-10	4.86409e-13	-0.343224	0.63	0.857	9.896e-09	2.16755e-12	-0.398933	0.79	0.919	4.40988e-08	2.20539e-22	-0.553657	0.61	0.887	4.48687e-18	4.13811e-15	-0.444458	0.518	0.816	8.41899e-11	5.93926e-07	1.76431e-21
Bex3	2.27481e-14	-0.579284	0.214	0.742	4.6281e-10	1.49733e-13	-0.42073	0.253	0.648	3.04631e-09	7.28093e-20	-0.638787	0.267	0.736	1.4813e-15	7.40616e-16	-0.409664	0.237	0.675	1.50678e-11	2.48709e-16	-0.353827	0.265	0.664	5.05998e-12	7.7918e-10	-0.399715	0.387	0.735	1.58524e-05	3.09306e-17	-0.495488	0.299	0.714	6.29283e-13	5.45831e-17	-0.454483	0.236	0.653	1.11049e-12	7.7918e-10	5.82474e-19
Atp6v1g2	6.21117e-17	-0.674154	0.126	0.647	1.26366e-12	1.77119e-13	-0.397824	0.181	0.553	3.6035e-09	8.16574e-14	-0.538415	0.274	0.656	1.66132e-09	4.77471e-13	-0.391545	0.192	0.575	9.71415e-09	2.75318e-24	-0.532328	0.142	0.582	5.60135e-20	4.93527e-10	-0.399767	0.303	0.669	1.00408e-05	7.91199e-21	-0.616359	0.189	0.629	1.6097e-16	3.80678e-23	-0.627881	0.178	0.625	7.74488e-19	4.93527e-10	2.20254e-23
Gnb1	3.16027e-15	-0.630136	0.233	0.751	6.42957e-11	2.1292e-13	-0.58076	0.386	0.732	4.33186e-09	9.00698e-10	-0.440107	0.489	0.767	1.83247e-05	1.46744e-12	-0.530152	0.353	0.718	2.9855e-08	1.59215e-19	-0.541858	0.338	0.725	3.23922e-15	2.35363e-07	-0.400302	0.563	0.804	0.00478846	8.46215e-14	-0.543696	0.451	0.771	1.72162e-09	1.72739e-18	-0.59187	0.445	0.817	3.51438e-14	2.35363e-07	1.27372e-18
Tceal9	1.21167e-18	-0.665828	0.097	0.652	2.46515e-14	2.09577e-20	-0.619179	0.163	0.607	4.26385e-16	2.31613e-18	-0.618384	0.267	0.713	4.71216e-14	1.30174e-24	-0.654518	0.122	0.635	2.64839e-20	3.9565e-21	-0.440661	0.187	0.619	8.04951e-17	5.55325e-10	-0.400328	0.311	0.688	1.12981e-05	4.06716e-16	-0.476596	0.274	0.679	8.27464e-12	1.72508e-21	-0.516186	0.131	0.564	3.50968e-17	5.55325e-10	1.04139e-23
Mapt	1.20343e-17	-0.739365	0.282	0.824	2.44837e-13	2.37191e-17	-0.562409	0.373	0.739	4.82565e-13	2.65241e-14	-0.483151	0.526	0.813	5.39633e-10	1.46968e-21	-0.650604	0.327	0.77	2.99006e-17	1.53534e-25	-0.640725	0.297	0.724	3.12365e-21	1.17967e-09	-0.400444	0.555	0.815	2.40004e-05	1.94114e-16	-0.457258	0.53	0.813	3.94925e-12	2.01317e-21	-0.54736	0.356	0.77	4.09579e-17	1.17967e-09	1.22827e-24
Eef2	3.41756e-08	-0.300291	0.262	0.692	0.000695303	1.87504e-12	-0.417953	0.367	0.741	3.81477e-08	5.9777e-07	-0.299406	0.496	0.795	0.0121616	1.13906e-14	-0.430463	0.282	0.722	2.31741e-10	1.26168e-24	-0.543673	0.26	0.723	2.56689e-20	3.30992e-09	-0.400627	0.487	0.816	6.73404e-05	5.7067e-11	-0.378782	0.451	0.776	1.16103e-06	1.18054e-11	-0.310054	0.351	0.74	2.4018e-07	5.9777e-07	1.00934e-23
Add1	2.20763e-15	-0.556368	0.068	0.532	4.49142e-11	6.04738e-20	-0.550548	0.078	0.492	1.23034e-15	6.97009e-10	-0.353382	0.215	0.56	1.41806e-05	1.49483e-18	-0.477632	0.109	0.533	3.04124e-14	2.2639e-25	-0.528594	0.073	0.477	4.6059e-21	2.12899e-10	-0.402534	0.185	0.538	4.33143e-06	4.39073e-18	-0.487308	0.14	0.558	8.93294e-14	1.95833e-17	-0.387116	0.11	0.486	3.98423e-13	6.97009e-10	1.81112e-24
Gnaq	1.52644e-13	-0.528015	0.175	0.665	3.10555e-09	2.01693e-19	-0.578501	0.151	0.59	4.10345e-15	2.32995e-11	-0.375069	0.274	0.673	4.74029e-07	8.65216e-20	-0.542361	0.16	0.633	1.76028e-15	2.25668e-19	-0.393636	0.169	0.57	4.59121e-15	3.49889e-11	-0.403022	0.261	0.659	7.11848e-07	2.09112e-10	-0.330426	0.323	0.678	4.25439e-06	1.38344e-15	-0.354682	0.215	0.628	2.8146e-11	2.09112e-10	6.92173e-19
Otub1	1.40734e-08	-0.425814	0.117	0.455	0.000286324	3.92224e-16	-0.520956	0.096	0.466	7.97981e-12	5.92663e-07	-0.265124	0.252	0.54	0.0120577	5.9042e-09	-0.276013	0.179	0.484	0.000120121	9.88418e-24	-0.616637	0.096	0.492	2.01094e-19	9.26383e-10	-0.403463	0.235	0.579	1.88473e-05	1.15463e-15	-0.496276	0.165	0.536	2.34909e-11	2.46806e-12	-0.39438	0.23	0.574	5.02126e-08	5.92663e-07	7.90735e-23
Hnrnpab	1.03049e-13	-0.527669	0.039	0.446	2.09654e-09	1.22906e-20	-0.5533	0.036	0.432	2.50053e-16	3.64835e-14	-0.472215	0.104	0.476	7.42257e-10	2.72395e-15	-0.365472	0.071	0.429	5.54188e-11	7.7502e-22	-0.463895	0.055	0.409	1.57678e-17	8.81102e-12	-0.40601	0.109	0.453	1.7926e-07	4.27527e-18	-0.426108	0.085	0.472	8.69804e-14	8.29233e-18	-0.478815	0.052	0.384	1.68708e-13	8.81102e-12	6.20016e-21
Tcp1	2.83132e-11	-0.431993	0.068	0.443	5.76032e-07	3.52908e-14	-0.411122	0.157	0.537	7.17992e-10	4.45971e-11	-0.349304	0.23	0.603	9.07327e-07	2.14605e-17	-0.466556	0.122	0.537	4.36614e-13	6.51943e-26	-0.535884	0.091	0.519	1.32638e-21	4.54404e-15	-0.408558	0.185	0.627	9.24485e-11	1.75853e-19	-0.532171	0.14	0.568	3.57774e-15	5.13258e-18	-0.33656	0.089	0.461	1.04422e-13	4.45971e-11	5.21555e-25
Csrnp3	1.11039e-09	-0.376287	0.087	0.438	2.25908e-05	7.85135e-14	-0.435094	0.133	0.483	1.59736e-09	1.38354e-08	-0.320157	0.222	0.526	0.000281481	7.78418e-12	-0.340558	0.154	0.504	1.58369e-07	1.18349e-23	-0.538821	0.078	0.472	2.40781e-19	6.73145e-10	-0.409955	0.168	0.503	1.36951e-05	4.84754e-08	-0.265002	0.25	0.546	0.000986231	1.60502e-16	-0.36109	0.147	0.533	3.26541e-12	4.84754e-08	9.46792e-23
Selenoh	1.96117e-12	-0.448658	0.087	0.502	3.99e-08	2.15296e-16	-0.462306	0.114	0.505	4.38019e-12	5.35713e-12	-0.417779	0.2	0.571	1.08991e-07	1.85694e-17	-0.502121	0.109	0.511	3.77795e-13	1.0919e-17	-0.320101	0.137	0.501	2.22148e-13	2.10357e-12	-0.411501	0.168	0.568	4.27972e-08	1.58753e-21	-0.62281	0.11	0.54	3.22982e-17	1.81199e-18	-0.416295	0.058	0.409	3.68649e-14	5.35713e-12	1.27002e-20
Denr	4.17476e-10	-0.27192	0.087	0.454	8.49356e-06	2.87751e-15	-0.398113	0.096	0.461	5.85429e-11	5.5489e-10	-0.286898	0.178	0.518	1.12892e-05	5.4475e-13	-0.366663	0.122	0.468	1.10829e-08	3.1573e-23	-0.409428	0.068	0.453	6.42352e-19	1.71549e-11	-0.411878	0.176	0.555	3.49017e-07	4.71725e-16	-0.407352	0.128	0.503	9.59724e-12	3.79258e-19	-0.483645	0.063	0.42	7.71601e-15	5.5489e-10	2.52584e-22
2900011O08Rik	1.32846e-09	-0.338556	0.146	0.542	2.70276e-05	6.45416e-14	-0.379519	0.127	0.481	1.3131e-09	1.81823e-17	-0.583418	0.141	0.571	3.69918e-13	1.36496e-19	-0.44368	0.09	0.526	2.77701e-15	6.81422e-23	-0.51904	0.096	0.487	1.38635e-18	4.54923e-11	-0.418528	0.202	0.563	9.25541e-07	1.5081e-16	-0.421001	0.159	0.568	3.06823e-12	1.84658e-16	-0.32886	0.12	0.492	3.75686e-12	1.32846e-09	5.45137e-22
Atp6v1g1	4.78855e-15	-0.478243	0.107	0.599	9.7423e-11	6.39936e-14	-0.334149	0.163	0.557	1.30195e-09	1.3162e-11	-0.344614	0.222	0.601	2.67781e-07	4.02671e-20	-0.432583	0.09	0.532	8.19234e-16	1.74993e-21	-0.447244	0.137	0.545	3.56023e-17	1.34738e-12	-0.418803	0.176	0.599	2.74125e-08	2.23591e-11	-0.277638	0.22	0.58	4.54896e-07	9.4365e-18	-0.356733	0.131	0.527	1.91986e-13	2.23591e-11	1.39994e-20
Bag1	1.20272e-21	-0.905233	0.087	0.667	2.44694e-17	1.13138e-20	-0.566498	0.151	0.609	2.3018e-16	8.14834e-15	-0.454747	0.267	0.686	1.65778e-10	7.32699e-26	-0.753244	0.109	0.621	1.49068e-21	8.02498e-26	-0.533421	0.151	0.612	1.63268e-21	2.97091e-10	-0.418807	0.319	0.696	6.04431e-06	1.43623e-29	-0.783573	0.159	0.682	2.92201e-25	3.89682e-27	-0.656928	0.094	0.564	7.92809e-23	2.97091e-10	1.14898e-28
Trim44	1.25604e-17	-0.661775	0.049	0.543	2.55541e-13	1.48191e-21	-0.55723	0.09	0.532	3.01494e-17	7.74502e-14	-0.440182	0.185	0.589	1.57572e-09	2.36505e-17	-0.410889	0.122	0.546	4.81169e-13	4.14398e-20	-0.367508	0.123	0.511	8.43093e-16	7.11993e-13	-0.419474	0.185	0.599	1.44855e-08	4.29524e-20	-0.499611	0.159	0.608	8.73866e-16	8.38394e-16	-0.318681	0.173	0.56	1.70571e-11	7.11993e-13	1.18552e-20
Hspa8	3.89683e-12	-0.446704	0.301	0.806	7.92811e-08	7.35096e-14	-0.4623	0.476	0.772	1.49555e-09	9.09192e-09	-0.381449	0.6	0.827	0.000184975	3.27242e-19	-0.665563	0.327	0.751	6.65774e-15	6.11228e-21	-0.536353	0.356	0.748	1.24354e-16	1.5101e-10	-0.424977	0.597	0.848	3.0723e-06	1.34846e-11	-0.410679	0.543	0.803	2.74344e-07	7.16884e-13	-0.338178	0.393	0.758	1.4585e-08	9.09192e-09	4.88982e-20
Ndrg4	1.73602e-16	-0.77102	0.311	0.803	3.53193e-12	5.38405e-12	-0.460028	0.44	0.769	1.09538e-07	4.02666e-10	-0.397887	0.6	0.833	8.19225e-06	6.48072e-15	-0.544029	0.346	0.759	1.3185e-10	7.85158e-23	-0.616079	0.365	0.769	1.5974e-18	8.46103e-09	-0.425011	0.529	0.821	0.00017214	8.03095e-14	-0.458281	0.506	0.822	1.6339e-09	4.65933e-20	-0.593623	0.414	0.816	9.47941e-16	8.46103e-09	6.28126e-22
Marcksl1	3.19035e-21	-0.807491	0.136	0.731	6.49076e-17	1.46323e-17	-0.556777	0.157	0.572	2.97694e-13	1.11664e-18	-0.474562	0.207	0.669	2.2718e-14	1.00294e-21	-0.645131	0.115	0.58	2.04049e-17	1.70303e-22	-0.486364	0.142	0.56	3.46481e-18	2.57521e-10	-0.426409	0.286	0.653	5.23926e-06	2.0803e-26	-0.755813	0.189	0.664	4.23237e-22	8.6444e-25	-0.611414	0.188	0.664	1.7587e-20	2.57521e-10	1.66424e-25
Rpl29	1.71081e-15	-0.5901	0.311	0.827	3.48065e-11	6.96151e-14	-0.484587	0.446	0.777	1.41632e-09	5.37267e-16	-0.545277	0.585	0.846	1.09307e-11	2.28598e-19	-0.623569	0.359	0.784	4.65083e-15	1.03532e-20	-0.538379	0.384	0.759	2.10636e-16	8.66154e-11	-0.427594	0.588	0.815	1.76219e-06	2.3381e-24	-0.693136	0.433	0.8	4.75687e-20	1.97097e-16	-0.463354	0.335	0.748	4.00993e-12	8.66154e-11	1.87048e-23
Hras	9.37034e-11	-0.363282	0.136	0.557	1.9064e-06	6.46081e-16	-0.440103	0.108	0.483	1.31445e-11	2.12077e-16	-0.55159	0.126	0.54	4.31471e-12	3.14958e-17	-0.511002	0.077	0.46	6.40781e-13	2.46892e-24	-0.520781	0.073	0.464	5.02302e-20	2.52358e-11	-0.431044	0.252	0.644	5.13422e-07	7.59277e-18	-0.493196	0.146	0.56	1.54475e-13	3.21823e-20	-0.492076	0.115	0.529	6.54748e-16	9.37034e-11	1.97514e-23
Ptp4a2	6.62544e-12	-0.474596	0.107	0.52	1.34795e-07	1.75683e-16	-0.466606	0.096	0.474	3.57427e-12	6.52231e-17	-0.569171	0.126	0.548	1.32696e-12	4.10501e-13	-0.300778	0.141	0.513	8.35164e-09	2.73967e-22	-0.425897	0.087	0.467	5.57386e-18	3.73465e-11	-0.432559	0.202	0.578	7.59814e-07	7.93553e-17	-0.477199	0.165	0.555	1.61448e-12	9.05449e-21	-0.394829	0.105	0.517	1.84214e-16	3.73465e-11	2.19174e-21
Idh3a	3.34155e-12	-0.502675	0.078	0.476	6.79839e-08	7.87392e-10	-0.265145	0.12	0.404	1.60195e-05	4.22257e-10	-0.326868	0.163	0.494	8.59081e-06	2.33431e-11	-0.278086	0.115	0.434	4.74916e-07	3.70581e-18	-0.396043	0.091	0.424	7.53948e-14	5.38706e-13	-0.432878	0.118	0.502	1.096e-08	4.85453e-13	-0.366844	0.146	0.488	9.87654e-09	2.77273e-16	-0.392852	0.115	0.475	5.64111e-12	7.87392e-10	2.96465e-17
Ncoa7	7.83641e-13	-0.395542	0.136	0.606	1.59432e-08	1.68205e-12	-0.342386	0.193	0.555	3.42213e-08	2.32725e-13	-0.473056	0.207	0.608	4.73479e-09	1.43138e-12	-0.352995	0.192	0.576	2.91215e-08	7.29893e-15	-0.259302	0.183	0.544	1.48497e-10	1.65611e-11	-0.433155	0.21	0.59	3.36936e-07	3.47013e-16	-0.443928	0.213	0.612	7.05998e-12	2.58544e-17	-0.322464	0.141	0.541	5.26008e-13	1.65611e-11	2.06835e-16
Pcnp	1.6998e-12	-0.464702	0.184	0.668	3.45824e-08	1.48876e-14	-0.433696	0.283	0.699	3.02888e-10	5.68834e-09	-0.281305	0.363	0.724	0.000115729	7.0205e-17	-0.558781	0.25	0.695	1.42832e-12	1.73073e-14	-0.302866	0.301	0.695	3.52116e-10	3.4832e-11	-0.437526	0.387	0.763	7.08656e-07	4.52953e-11	-0.351392	0.39	0.73	9.21534e-07	1.8467e-17	-0.363409	0.225	0.672	3.75711e-13	5.68834e-09	1.47736e-16
Pdcd4	3.81873e-09	-0.290435	0.155	0.547	7.76921e-05	2.04222e-14	-0.488801	0.145	0.515	4.1549e-10	2.82333e-14	-0.499045	0.148	0.542	5.74406e-10	1.04208e-17	-0.522407	0.096	0.503	2.12011e-13	8.58573e-19	-0.37143	0.123	0.491	1.74677e-14	8.28011e-11	-0.438522	0.202	0.569	1.68459e-06	3.97125e-16	-0.506002	0.171	0.555	8.0795e-12	2.24954e-14	-0.40588	0.162	0.515	4.57669e-10	3.81873e-09	6.86859e-18
Atp5a1	3.29679e-12	-0.488726	0.175	0.643	6.70732e-08	2.08741e-18	-0.545644	0.145	0.581	4.24683e-14	3.55841e-11	-0.358705	0.319	0.7	7.23959e-07	6.317e-12	-0.33952	0.205	0.601	1.28519e-07	6.92163e-21	-0.44268	0.187	0.606	1.40821e-16	1.20854e-11	-0.438634	0.319	0.702	2.45878e-07	1.67312e-13	-0.386543	0.287	0.684	3.40397e-09	5.46481e-21	-0.485051	0.22	0.676	1.11182e-16	3.55841e-11	4.37185e-20
Ncl	2.53265e-15	-0.575196	0.068	0.532	5.15267e-11	2.19851e-15	-0.426622	0.133	0.525	4.47287e-11	1.01522e-11	-0.403511	0.237	0.611	2.06546e-07	1.10536e-20	-0.613024	0.115	0.566	2.24886e-16	2.45321e-22	-0.419059	0.114	0.524	4.99106e-18	1.15777e-13	-0.43937	0.185	0.608	2.35549e-09	1.88101e-19	-0.453077	0.171	0.592	3.82691e-15	4.09847e-15	-0.284056	0.136	0.499	8.33833e-11	1.01522e-11	1.96257e-21
Myl12b	3.3217e-11	-0.442345	0.049	0.405	6.75799e-07	2.90927e-14	-0.350365	0.06	0.381	5.91892e-10	2.41652e-16	-0.518213	0.067	0.459	4.9164e-12	1.61165e-17	-0.455956	0.038	0.402	3.2789e-13	5.32315e-18	-0.349824	0.059	0.374	1.08299e-13	1.16862e-12	-0.439829	0.084	0.447	2.37755e-08	3.45869e-16	-0.464465	0.085	0.441	7.0367e-12	1.24162e-16	-0.347303	0.063	0.393	2.52607e-12	3.3217e-11	4.25852e-17
Jund	4.5235e-12	-0.500266	0.049	0.426	9.20306e-08	8.94617e-13	-0.359728	0.054	0.345	1.8201e-08	2.17254e-11	-0.420518	0.089	0.398	4.42003e-07	1.91361e-11	-0.273079	0.051	0.325	3.89324e-07	1.69071e-15	-0.282688	0.055	0.333	3.43976e-11	1.98942e-12	-0.440684	0.092	0.463	4.04748e-08	2.59765e-13	-0.341449	0.067	0.373	5.28493e-09	5.40264e-23	-0.562258	0.094	0.523	1.09917e-18	2.17254e-11	4.32211e-22
Atp5h	7.21254e-12	-0.34272	0.165	0.625	1.46739e-07	7.55147e-14	-0.387829	0.211	0.617	1.53635e-09	1.39908e-13	-0.4768	0.296	0.702	2.84643e-09	2.6609e-19	-0.567712	0.16	0.63	5.4136e-15	9.38334e-23	-0.497925	0.178	0.628	1.90904e-18	7.22361e-13	-0.441243	0.277	0.699	1.46964e-08	4.12792e-17	-0.472359	0.256	0.671	8.39825e-13	6.93692e-14	-0.284148	0.188	0.573	1.41132e-09	7.21254e-12	7.50667e-22
Pura	1.01019e-16	-0.711653	0.272	0.782	2.05524e-12	2.24705e-17	-0.543277	0.253	0.669	4.57162e-13	2.13548e-15	-0.51368	0.356	0.749	4.34464e-11	2.3009e-23	-0.710576	0.218	0.724	4.68117e-19	3.64552e-30	-0.621924	0.201	0.699	7.41681e-26	4.75801e-11	-0.442729	0.395	0.75	9.68016e-07	6.00368e-17	-0.530595	0.396	0.768	1.22145e-12	6.43943e-16	-0.426873	0.361	0.748	1.3101e-11	4.75801e-11	2.91642e-29
Ppp3r1	3.72856e-13	-0.602407	0.243	0.728	7.58575e-09	8.64289e-19	-0.592472	0.199	0.63	1.7584e-14	9.43992e-08	-0.317095	0.43	0.745	0.00192055	1.34291e-18	-0.569018	0.205	0.677	2.73215e-14	3.5699e-21	-0.485394	0.242	0.664	7.26296e-17	3.27794e-10	-0.443048	0.361	0.712	6.66898e-06	4.82788e-09	-0.335272	0.415	0.73	9.82232e-05	6.97503e-18	-0.491853	0.272	0.685	1.41907e-13	9.43992e-08	2.85592e-20
Snrpn	1.87778e-16	-0.640028	0.447	0.881	3.82035e-12	5.4781e-29	-0.807158	0.355	0.788	1.11452e-24	1.69986e-19	-0.599228	0.548	0.843	3.45837e-15	1.83302e-18	-0.602151	0.359	0.767	3.72928e-14	5.61352e-30	-0.69526	0.356	0.797	1.14207e-25	1.49893e-12	-0.444073	0.597	0.847	3.04957e-08	1.1501e-22	-0.616719	0.421	0.806	2.33988e-18	7.20282e-24	-0.585469	0.414	0.812	1.46541e-19	1.49893e-12	4.49082e-29
Plekhb2	7.51309e-17	-0.673086	0.107	0.621	1.52854e-12	7.05577e-19	-0.515999	0.133	0.564	1.4355e-14	7.80457e-13	-0.421707	0.244	0.655	1.58784e-08	7.0317e-19	-0.540781	0.141	0.58	1.4306e-14	4.60927e-27	-0.561157	0.114	0.566	9.37756e-23	1.20733e-11	-0.445684	0.261	0.658	2.45632e-07	1.80147e-20	-0.584527	0.189	0.637	3.6651e-16	2.33701e-17	-0.413674	0.173	0.58	4.75466e-13	1.20733e-11	3.68742e-26
Sub1	1.04299e-09	-0.375639	0.262	0.728	2.12196e-05	1.11076e-14	-0.420044	0.265	0.659	2.25985e-10	3.30511e-09	-0.363342	0.407	0.749	6.72424e-05	2.99201e-18	-0.523302	0.205	0.676	6.08725e-14	1.74017e-17	-0.38085	0.237	0.652	3.54038e-13	8.85559e-11	-0.446651	0.37	0.741	1.80167e-06	2.76431e-19	-0.543559	0.293	0.724	5.62399e-15	2.05201e-15	-0.370106	0.236	0.646	4.17481e-11	3.30511e-09	2.21145e-18
Eif3e	1.54595e-15	-0.707944	0.058	0.512	3.14525e-11	5.55118e-14	-0.436607	0.163	0.534	1.12939e-09	1.14433e-12	-0.371391	0.222	0.618	2.32815e-08	4.03448e-19	-0.496373	0.109	0.549	8.20814e-15	5.34649e-20	-0.429569	0.132	0.522	1.08774e-15	1.74955e-12	-0.447594	0.21	0.62	3.55946e-08	4.20431e-13	-0.31246	0.183	0.554	8.55367e-09	1.25851e-18	-0.509721	0.079	0.442	2.56043e-14	1.74955e-12	4.27719e-19
Chmp4b	3.74622e-13	-0.528979	0.126	0.584	7.62168e-09	1.27056e-14	-0.374975	0.145	0.531	2.58495e-10	3.80718e-19	-0.547502	0.141	0.619	7.74571e-15	1.36395e-21	-0.589679	0.096	0.56	2.77495e-17	4.98336e-32	-0.698047	0.082	0.55	1.01387e-27	4.21746e-13	-0.450873	0.176	0.582	8.58043e-09	1.06251e-21	-0.577276	0.122	0.582	2.16167e-17	1.10178e-22	-0.530937	0.115	0.556	2.24158e-18	4.21746e-13	3.98669e-31
Hdgfl3	9.02803e-11	-0.344541	0.165	0.608	1.83675e-06	1.92706e-18	-0.488998	0.139	0.572	3.9206e-14	1.06133e-16	-0.489965	0.163	0.619	2.15927e-12	1.01878e-14	-0.370474	0.192	0.615	2.07271e-10	1.57443e-18	-0.358324	0.174	0.573	3.20318e-14	3.13788e-13	-0.452687	0.202	0.621	6.38401e-09	1.30662e-14	-0.390604	0.25	0.646	2.65833e-10	8.3578e-21	-0.429398	0.131	0.56	1.70039e-16	9.02803e-11	6.68624e-20
Syn1	1.40033e-11	-0.428163	0.117	0.53	2.84897e-07	1.56644e-20	-0.552761	0.048	0.451	3.18692e-16	1.00562e-11	-0.384706	0.185	0.559	2.04594e-07	8.33384e-22	-0.658692	0.058	0.488	1.69552e-17	2.41186e-24	-0.52742	0.082	0.48	4.90693e-20	2.71687e-12	-0.454076	0.16	0.553	5.52748e-08	9.24311e-16	-0.396671	0.159	0.537	1.88051e-11	2.87642e-18	-0.453693	0.157	0.563	5.85208e-14	1.40033e-11	1.92949e-23
Mllt11	7.64392e-19	-0.801668	0.252	0.803	1.55516e-14	8.29162e-15	-0.490488	0.307	0.699	1.68693e-10	2.50774e-15	-0.517697	0.422	0.795	5.102e-11	1.89175e-14	-0.474843	0.282	0.703	3.84876e-10	2.17459e-21	-0.46233	0.237	0.691	4.42421e-17	1.17229e-12	-0.456076	0.42	0.791	2.38503e-08	5.35833e-17	-0.461	0.384	0.783	1.09015e-12	8.84425e-14	-0.405277	0.351	0.72	1.79936e-09	1.17229e-12	1.73967e-20
Atxn7l3b	1.18517e-19	-0.831124	0.223	0.783	2.41123e-15	6.57165e-15	-0.444911	0.235	0.654	1.337e-10	1.76015e-16	-0.59316	0.319	0.735	3.58103e-12	9.71576e-22	-0.56377	0.192	0.696	1.97667e-17	3.41649e-23	-0.484178	0.215	0.66	6.95085e-19	5.49537e-12	-0.458914	0.319	0.735	1.11803e-07	1.17801e-17	-0.510255	0.311	0.742	2.39666e-13	1.76358e-22	-0.611211	0.246	0.711	3.588e-18	5.49537e-12	2.73319e-22
Pak1	1.71351e-13	-0.494069	0.136	0.605	3.48613e-09	8.34997e-20	-0.561814	0.084	0.502	1.6988e-15	6.32377e-15	-0.44343	0.193	0.608	1.28657e-10	2.80141e-14	-0.36346	0.154	0.55	5.69947e-10	3.62527e-19	-0.376431	0.146	0.535	7.3756e-15	2.48607e-12	-0.46045	0.176	0.579	5.05791e-08	1.86105e-19	-0.530913	0.171	0.596	3.7863e-15	2.24161e-16	-0.374154	0.168	0.553	4.56055e-12	2.48607e-12	6.67997e-19
Eif4b	7.70743e-08	-0.276265	0.117	0.44	0.00156808	2.54804e-13	-0.398625	0.114	0.452	5.18399e-09	2.11022e-09	-0.349731	0.215	0.548	4.29325e-05	2.56685e-16	-0.495387	0.083	0.463	5.22226e-12	2.6225e-17	-0.313418	0.105	0.447	5.33547e-13	3.58725e-12	-0.461273	0.185	0.569	7.29827e-08	1.47988e-12	-0.349584	0.183	0.529	3.01082e-08	4.02465e-16	-0.336816	0.12	0.485	8.18816e-12	7.70743e-08	2.098e-16
Pgam1	2.23066e-12	-0.43714	0.175	0.649	4.53828e-08	2.81674e-09	-0.279725	0.247	0.579	5.73065e-05	6.31931e-08	-0.301445	0.333	0.675	0.00128566	4.87318e-12	-0.325001	0.199	0.578	9.91448e-08	4.36507e-18	-0.427778	0.196	0.59	8.88073e-14	5.60921e-12	-0.462347	0.261	0.668	1.14119e-07	2.19696e-09	-0.279539	0.329	0.677	4.46972e-05	1.32859e-20	-0.572573	0.199	0.635	2.70302e-16	6.31931e-08	1.06287e-19
Necap1	2.87965e-13	-0.481503	0.117	0.579	5.85865e-09	1.8984e-20	-0.54981	0.084	0.516	3.86229e-16	2.04424e-15	-0.499983	0.185	0.611	4.159e-11	2.11974e-21	-0.580972	0.103	0.556	4.3126e-17	1.84791e-24	-0.447701	0.114	0.54	3.75958e-20	1.08905e-12	-0.464436	0.202	0.611	2.21567e-08	6.84633e-21	-0.562541	0.159	0.603	1.39289e-16	1.89651e-21	-0.466734	0.126	0.557	3.85846e-17	1.08905e-12	1.47833e-23
Bex2	4.44671e-06	-0.278398	0.398	0.801	0.0904683	4.1624e-12	-0.386336	0.38	0.726	8.4684e-08	1.42166e-08	-0.314634	0.511	0.794	0.000289238	1.85987e-11	-0.353206	0.34	0.736	3.7839e-07	2.06742e-24	-0.567596	0.265	0.711	4.20617e-20	1.34184e-12	-0.464767	0.403	0.785	2.72997e-08	9.3894e-18	-0.526891	0.384	0.776	1.91027e-13	1.14983e-21	-0.584398	0.262	0.72	2.33932e-17	4.44671e-06	1.65394e-23
Chp1	3.94528e-11	-0.457904	0.058	0.423	8.02666e-07	2.41036e-18	-0.511934	0.06	0.44	4.90388e-14	4.09473e-12	-0.413541	0.163	0.518	8.33073e-08	4.94484e-18	-0.535622	0.058	0.441	1.00603e-13	1.17266e-19	-0.384991	0.082	0.432	2.38578e-15	7.95008e-13	-0.464904	0.143	0.532	1.61744e-08	3.64622e-21	-0.543967	0.085	0.512	7.41823e-17	5.189e-19	-0.446768	0.052	0.405	1.0557e-14	3.94528e-11	2.91697e-20
Elavl2	1.3543e-08	-0.395567	0.175	0.542	0.000275533	5.15058e-13	-0.470294	0.169	0.513	1.04789e-08	2.19623e-12	-0.583781	0.193	0.553	4.46823e-08	3.03604e-12	-0.482911	0.199	0.554	6.17683e-08	8.83324e-18	-0.481283	0.174	0.54	1.79712e-13	3.68966e-08	-0.466518	0.269	0.574	0.000750661	4.6144e-12	-0.469397	0.256	0.591	9.388e-08	6.60641e-15	-0.441365	0.199	0.565	1.34407e-10	3.68966e-08	7.0666e-17
Rnf187	4.94419e-16	-0.536594	0.126	0.651	1.0059e-11	1.3963e-14	-0.384804	0.175	0.568	2.84077e-10	5.86853e-17	-0.551873	0.23	0.676	1.19395e-12	8.32924e-24	-0.686796	0.096	0.582	1.69458e-19	6.20912e-22	-0.436432	0.146	0.556	1.26325e-17	9.70926e-12	-0.467258	0.277	0.647	1.97535e-07	3.85196e-15	-0.448708	0.256	0.649	7.83681e-11	1.35225e-20	-0.522023	0.194	0.634	2.75115e-16	9.70926e-12	6.66339e-23
Oaz1	7.6599e-20	-0.660346	0.592	0.926	1.55841e-15	4.36677e-18	-0.501966	0.639	0.868	8.88419e-14	1.31772e-19	-0.546774	0.689	0.897	2.68091e-15	2.06051e-19	-0.507888	0.538	0.856	4.19211e-15	2.0145e-17	-0.403701	0.557	0.851	4.0985e-13	8.13652e-15	-0.467599	0.714	0.914	1.65537e-10	8.31679e-32	-0.709712	0.561	0.887	1.69205e-27	7.03197e-19	-0.462816	0.618	0.872	1.43065e-14	8.13652e-15	6.65343e-31
Prkacb	4.27909e-08	-0.362211	0.476	0.859	0.000870581	3.97278e-12	-0.463734	0.476	0.756	8.08262e-08	8.36321e-09	-0.293213	0.63	0.854	0.000170149	7.34903e-26	-0.780953	0.276	0.785	1.49516e-21	2.45904e-20	-0.541243	0.384	0.771	5.00292e-16	1.41397e-11	-0.470232	0.546	0.828	2.87671e-07	9.35075e-14	-0.424086	0.61	0.842	1.90241e-09	9.16226e-20	-0.524864	0.429	0.819	1.86406e-15	4.27909e-08	5.87923e-25
Syn2	8.38878e-16	-0.756162	0.194	0.702	1.7067e-11	3.49789e-18	-0.589911	0.163	0.587	7.11646e-14	1.29696e-07	-0.336087	0.378	0.666	0.00263867	5.26766e-14	-0.48618	0.205	0.601	1.07171e-09	1.25048e-30	-0.717647	0.119	0.588	2.54409e-26	2.85819e-10	-0.471204	0.311	0.679	5.81499e-06	6.81749e-10	-0.372434	0.348	0.665	1.38702e-05	5.00298e-16	-0.45469	0.23	0.639	1.01786e-11	1.29696e-07	1.00038e-29
Ndufb5	1.93004e-12	-0.50487	0.175	0.649	3.92666e-08	1.38455e-15	-0.486209	0.247	0.658	2.81687e-11	1.40945e-11	-0.447245	0.37	0.741	2.86752e-07	1.87212e-17	-0.500105	0.224	0.67	3.80883e-13	6.25102e-13	-0.323722	0.288	0.663	1.27177e-08	1.76076e-12	-0.472802	0.345	0.745	3.58226e-08	1.37603e-13	-0.378005	0.305	0.707	2.79953e-09	3.38114e-13	-0.365201	0.267	0.661	6.87893e-09	1.40945e-11	1.4977e-16
Tpi1	4.6833e-10	-0.394443	0.184	0.606	9.52818e-06	5.57369e-17	-0.471192	0.12	0.528	1.13397e-12	1.26473e-10	-0.360182	0.274	0.634	2.5731e-06	9.79355e-19	-0.581644	0.109	0.539	1.9925e-14	6.95807e-19	-0.391476	0.151	0.532	1.41562e-14	1.60486e-12	-0.473323	0.218	0.608	3.26508e-08	2.26425e-15	-0.485841	0.238	0.619	4.60661e-11	8.34045e-15	-0.383669	0.225	0.609	1.69686e-10	4.6833e-10	5.56646e-18
Pkm	1.34335e-17	-0.775953	0.175	0.711	2.73306e-13	3.69537e-16	-0.534664	0.241	0.637	7.51822e-12	2.62596e-10	-0.40578	0.385	0.741	5.34252e-06	2.55686e-20	-0.585397	0.186	0.664	5.20193e-16	6.3865e-24	-0.551935	0.219	0.665	1.29933e-19	5.63717e-11	-0.476641	0.361	0.717	1.14688e-06	3.45983e-14	-0.404187	0.341	0.729	7.03903e-10	9.117e-15	-0.404228	0.309	0.699	1.85485e-10	2.62596e-10	5.1092e-23
Hspe1	2.52379e-11	-0.368523	0.184	0.639	5.13465e-07	4.17966e-25	-0.724334	0.145	0.633	8.50351e-21	1.07759e-16	-0.556562	0.237	0.69	2.19237e-12	1.36575e-15	-0.433066	0.186	0.607	2.77863e-11	8.97532e-16	-0.30702	0.21	0.594	1.82603e-11	5.34691e-13	-0.47733	0.261	0.682	1.08783e-08	3.4129e-16	-0.51117	0.256	0.652	6.94354e-12	1.08799e-14	-0.30262	0.188	0.581	2.21352e-10	2.52379e-11	3.34372e-24
Mapre2	3.49941e-09	-0.350486	0.146	0.528	7.11955e-05	2.70505e-18	-0.495682	0.09	0.493	5.50342e-14	2.37163e-12	-0.402556	0.193	0.569	4.82508e-08	2.32551e-15	-0.333744	0.115	0.509	4.73125e-11	7.29964e-24	-0.463162	0.087	0.496	1.48511e-19	2.38373e-13	-0.477842	0.176	0.577	4.8497e-09	5.83686e-18	-0.4934	0.171	0.59	1.18751e-13	1.49725e-19	-0.436351	0.105	0.502	3.04615e-15	3.49941e-09	5.83971e-23
Clta	5.74532e-11	-0.397082	0.146	0.572	1.16889e-06	7.17379e-11	-0.266273	0.205	0.558	1.45951e-06	2.37283e-14	-0.483093	0.274	0.677	4.82753e-10	7.01267e-15	-0.417664	0.179	0.588	1.42673e-10	1.04771e-14	-0.261097	0.201	0.57	2.13156e-10	2.76683e-13	-0.478008	0.227	0.647	5.62912e-09	4.47695e-12	-0.28331	0.238	0.611	9.10836e-08	2.53372e-14	-0.307521	0.183	0.565	5.15485e-10	7.17379e-11	5.61014e-14
Sobp	1.97768e-14	-0.661975	0.029	0.438	4.02359e-10	2.79257e-13	-0.337533	0.09	0.416	5.68148e-09	1.19387e-13	-0.499896	0.081	0.429	2.42892e-09	2.55612e-15	-0.387258	0.058	0.405	5.20042e-11	1.03531e-15	-0.315074	0.073	0.368	2.10634e-11	2.72059e-12	-0.47876	0.118	0.483	5.53504e-08	1.63556e-12	-0.351661	0.128	0.45	3.32754e-08	1.43818e-15	-0.321708	0.079	0.403	2.92599e-11	2.72059e-12	8.28248e-15
Pfn2	4.65496e-13	-0.552965	0.243	0.747	9.47051e-09	1.19012e-21	-0.65743	0.211	0.672	2.4213e-17	2.12135e-12	-0.461127	0.378	0.732	4.31589e-08	2.04166e-15	-0.498949	0.256	0.692	4.15375e-11	3.82746e-19	-0.417901	0.247	0.68	7.78698e-15	9.28298e-12	-0.478965	0.378	0.746	1.88862e-07	4.00369e-19	-0.553709	0.329	0.735	8.1455e-15	5.069e-15	-0.443297	0.319	0.713	1.03129e-10	9.28298e-12	9.52098e-21
Hpcal1	7.55406e-06	-0.255624	0.117	0.37	0.153687	3.7804e-08	-0.290583	0.151	0.406	0.000769123	1.27447e-08	-0.347531	0.156	0.444	0.000259291	2.7397e-16	-0.665439	0.045	0.384	5.57393e-12	8.53111e-11	-0.263613	0.091	0.322	1.73565e-06	6.91502e-09	-0.479725	0.16	0.459	0.000140686	1.11296e-15	-0.592686	0.122	0.468	2.26432e-11	7.23708e-10	-0.277731	0.131	0.394	1.47238e-05	7.55406e-06	2.19176e-15
Pja2	1.4253e-13	-0.595448	0.272	0.793	2.89977e-09	1.59128e-17	-0.595573	0.295	0.693	3.23745e-13	1.57659e-11	-0.451017	0.437	0.768	3.20758e-07	2.68144e-17	-0.54326	0.282	0.735	5.45539e-13	3.89313e-25	-0.609784	0.251	0.717	7.92058e-21	2.28395e-11	-0.486116	0.378	0.749	4.6467e-07	1.33301e-19	-0.523867	0.396	0.78	2.71202e-15	1.3109e-21	-0.533859	0.309	0.753	2.66702e-17	2.28395e-11	3.11451e-24
Cfl1	7.18442e-11	-0.473602	0.388	0.84	1.46167e-06	9.29618e-11	-0.361569	0.38	0.736	1.89131e-06	4.98469e-12	-0.407581	0.474	0.812	1.01413e-07	4.06227e-14	-0.380357	0.288	0.724	8.26468e-10	7.70832e-16	-0.349441	0.324	0.734	1.56826e-11	2.72498e-12	-0.486736	0.395	0.797	5.54397e-08	2.45709e-13	-0.389639	0.433	0.786	4.99895e-09	1.4021e-13	-0.337447	0.361	0.75	2.85257e-09	9.29618e-11	6.16666e-15
Gpx1	1.31779e-08	-0.316719	0.087	0.41	0.000268105	6.44052e-15	-0.362885	0.048	0.371	1.31032e-10	2.78861e-09	-0.294645	0.141	0.447	5.67342e-05	1.61047e-13	-0.418553	0.058	0.37	3.2765e-09	7.86279e-16	-0.322595	0.068	0.359	1.59969e-11	1.4476e-12	-0.489587	0.092	0.452	2.94515e-08	3.75424e-14	-0.397247	0.091	0.414	7.638e-10	8.97118e-15	-0.316916	0.079	0.393	1.82519e-10	1.31779e-08	6.29024e-15
Atp5l	5.26674e-18	-0.714809	0.184	0.759	1.07152e-13	8.96354e-11	-0.358844	0.343	0.706	1.82363e-06	7.06671e-13	-0.450037	0.37	0.786	1.43772e-08	8.48875e-15	-0.437097	0.276	0.715	1.72704e-10	1.53522e-16	-0.368625	0.288	0.711	3.12341e-12	3.34708e-16	-0.489842	0.311	0.785	6.80963e-12	7.76664e-19	-0.537974	0.335	0.755	1.58012e-14	3.28651e-12	-0.329549	0.335	0.709	6.68641e-08	8.96354e-11	6.21331e-18
Atp5j	5.64419e-10	-0.31297	0.262	0.758	1.14831e-05	2.80894e-13	-0.456971	0.325	0.722	5.71479e-09	4.50982e-08	-0.262524	0.489	0.806	0.000917524	1.1465e-19	-0.588516	0.256	0.738	2.33256e-15	1.91874e-17	-0.412162	0.315	0.749	3.90368e-13	6.91233e-14	-0.490408	0.378	0.781	1.40631e-09	4.18444e-18	-0.483483	0.366	0.779	8.51324e-14	2.07971e-13	-0.314501	0.314	0.716	4.23118e-09	4.50982e-08	9.172e-19
Atp6v1e1	1.37379e-13	-0.520713	0.068	0.492	2.79497e-09	3.17922e-15	-0.41139	0.072	0.416	6.46813e-11	6.0371e-11	-0.311874	0.156	0.495	1.22825e-06	1.97357e-15	-0.456052	0.071	0.422	4.01523e-11	1.97414e-23	-0.548208	0.05	0.418	4.01639e-19	1.29708e-13	-0.490597	0.092	0.485	2.63891e-09	1.59775e-19	-0.536619	0.085	0.483	3.25062e-15	7.63354e-18	-0.36331	0.099	0.471	1.55304e-13	6.0371e-11	1.57931e-22
Hmgb1	1.55115e-11	-0.418365	0.175	0.638	3.15582e-07	1.18257e-15	-0.45018	0.169	0.564	2.40593e-11	7.47295e-16	-0.552562	0.193	0.602	1.52037e-11	3.56924e-13	-0.337704	0.186	0.585	7.26162e-09	2.1757e-18	-0.317635	0.16	0.556	4.42647e-14	6.84828e-14	-0.490725	0.16	0.578	1.39328e-09	1.59936e-17	-0.419697	0.171	0.593	3.25391e-13	3.48211e-15	-0.300419	0.173	0.555	7.08435e-11	1.55115e-11	1.74056e-17
Gng3	1.342e-14	-0.595652	0.311	0.817	2.73031e-10	1.62356e-13	-0.447241	0.331	0.722	3.30314e-09	1.96871e-12	-0.472938	0.474	0.799	4.00534e-08	1.53922e-18	-0.563269	0.256	0.723	3.13154e-14	6.23722e-22	-0.515236	0.283	0.716	1.26896e-17	1.16497e-13	-0.492302	0.403	0.794	2.37013e-09	5.93354e-12	-0.368693	0.402	0.77	1.20718e-07	1.00762e-20	-0.568261	0.335	0.782	2.05e-16	5.93354e-12	4.98977e-21
Hint1	4.881e-14	-0.52957	0.223	0.753	9.93039e-10	4.57826e-08	-0.262044	0.38	0.703	0.000931448	1.14463e-12	-0.437707	0.452	0.791	2.32875e-08	3.4671e-21	-0.638625	0.244	0.718	7.05381e-17	1.45479e-18	-0.463949	0.288	0.711	2.95977e-14	2.60487e-14	-0.494282	0.345	0.764	5.2996e-10	1.05638e-18	-0.542286	0.323	0.745	2.14921e-14	4.77861e-19	-0.386835	0.251	0.701	9.72208e-15	4.57826e-08	2.77368e-20
Chn1	1.41377e-11	-0.47862	0.078	0.466	2.87631e-07	1.89124e-11	-0.320135	0.114	0.419	3.84772e-07	1.63985e-08	-0.332875	0.215	0.531	0.000333627	1.52177e-11	-0.308441	0.128	0.461	3.09605e-07	9.92347e-18	-0.368025	0.114	0.462	2.01893e-13	4.05722e-11	-0.494938	0.176	0.54	8.25442e-07	2.17264e-11	-0.38374	0.226	0.551	4.42025e-07	4.9798e-18	-0.452298	0.11	0.487	1.01314e-13	1.63985e-08	3.98384e-17
Ndufa2	1.61501e-09	-0.332062	0.33	0.802	3.28574e-05	1.67262e-12	-0.392742	0.337	0.726	3.40294e-08	2.18722e-15	-0.443572	0.356	0.781	4.4499e-11	2.56922e-19	-0.510495	0.237	0.723	5.22709e-15	8.33866e-21	-0.417847	0.265	0.717	1.6965e-16	1.41334e-14	-0.495548	0.387	0.78	2.87543e-10	1.57008e-20	-0.53929	0.305	0.755	3.19433e-16	2.00751e-21	-0.517239	0.267	0.75	4.08429e-17	1.61501e-09	1.60601e-20
Sh3gl2	3.67524e-12	-0.579836	0.058	0.44	7.47728e-08	6.84193e-16	-0.484298	0.048	0.382	1.39199e-11	1.73256e-13	-0.423335	0.096	0.458	3.5249e-09	7.29085e-10	-0.279468	0.128	0.419	1.48332e-05	3.18855e-19	-0.43822	0.064	0.393	6.4871e-15	2.23231e-13	-0.497479	0.101	0.471	4.54163e-09	6.02667e-11	-0.328137	0.159	0.459	1.22613e-06	5.05694e-21	-0.552535	0.068	0.455	1.02883e-16	7.29085e-10	4.04555e-20
2900097C17Rik	4.34133e-12	-0.56321	0.408	0.841	8.83244e-08	9.54947e-28	-0.760536	0.386	0.8	1.94284e-23	3.8487e-14	-0.477533	0.637	0.869	7.83017e-10	3.41387e-22	-0.663947	0.417	0.81	6.94552e-18	1.71845e-23	-0.574678	0.47	0.821	3.49619e-19	7.38473e-15	-0.498595	0.605	0.868	1.50242e-10	3.33899e-25	-0.642657	0.537	0.865	6.79317e-21	1.26548e-25	-0.675188	0.414	0.795	2.57461e-21	4.34133e-12	7.63958e-27
B630019K06Rik	2.37766e-16	-0.662229	0.087	0.585	4.83735e-12	9.86667e-15	-0.407251	0.114	0.48	2.00737e-10	1.6649e-11	-0.401651	0.222	0.586	3.38723e-07	3.28142e-19	-0.604911	0.071	0.48	6.67606e-15	6.77523e-21	-0.414562	0.11	0.493	1.37842e-16	8.68896e-13	-0.499477	0.134	0.527	1.76777e-08	1.35142e-09	-0.2777	0.22	0.531	2.74947e-05	1.47461e-15	-0.3748	0.173	0.558	3.0001e-11	1.35142e-09	5.42018e-20
Eif3f	1.04824e-15	-0.612418	0.146	0.668	2.13264e-11	8.34705e-19	-0.504898	0.181	0.63	1.69821e-14	3.0648e-17	-0.59405	0.319	0.736	6.23534e-13	4.37419e-31	-0.860176	0.09	0.659	8.89929e-27	4.80356e-22	-0.460318	0.201	0.638	9.77284e-18	3.875e-12	-0.500804	0.345	0.744	7.88368e-08	3.20045e-13	-0.381305	0.293	0.672	6.51131e-09	1.81518e-19	-0.438157	0.178	0.609	3.69298e-15	3.875e-12	3.49935e-30
Cab39	1.31741e-20	-0.894786	0.019	0.537	2.68028e-16	1.52459e-17	-0.527847	0.09	0.476	3.10178e-13	7.61405e-11	-0.353597	0.193	0.552	1.54908e-06	4.71229e-16	-0.394563	0.115	0.513	9.58714e-12	8.90295e-28	-0.614437	0.068	0.488	1.81131e-23	3.26505e-13	-0.502272	0.168	0.556	6.64274e-09	6.91581e-24	-0.623343	0.104	0.577	1.40702e-19	8.82531e-25	-0.593367	0.063	0.492	1.79551e-20	7.61405e-11	7.12236e-27
Prkar2a	8.29422e-15	-0.576967	0.087	0.553	1.68746e-10	2.56213e-22	-0.57979	0.078	0.527	5.21266e-18	5.48649e-10	-0.359272	0.215	0.563	1.11623e-05	1.31274e-16	-0.371352	0.135	0.557	2.67078e-12	6.24903e-26	-0.51961	0.082	0.497	1.27137e-21	2.59837e-12	-0.503339	0.202	0.594	5.28638e-08	4.26081e-16	-0.500366	0.207	0.592	8.66863e-12	6.09068e-18	-0.415388	0.12	0.51	1.23915e-13	5.48649e-10	4.99922e-25
Stx1b	4.49734e-14	-0.569167	0.097	0.547	9.14984e-10	4.82287e-15	-0.447561	0.102	0.463	9.81213e-11	5.16836e-18	-0.543535	0.141	0.578	1.0515e-13	5.58247e-18	-0.576115	0.09	0.493	1.13575e-13	1.37211e-23	-0.501063	0.096	0.501	2.79156e-19	1.05688e-12	-0.506037	0.185	0.574	2.15021e-08	5.35235e-16	-0.468215	0.183	0.569	1.08894e-11	5.96687e-12	-0.262445	0.215	0.568	1.21396e-07	5.96687e-12	1.09769e-22
Rasgrf2	3.82978e-10	-0.402787	0.126	0.514	7.79168e-06	7.0353e-11	-0.347578	0.175	0.493	1.43133e-06	1.18748e-07	-0.306902	0.252	0.54	0.00241592	5.57456e-11	-0.315893	0.16	0.494	1.13414e-06	3.29593e-14	-0.377712	0.142	0.453	6.70556e-10	2.82204e-10	-0.506747	0.193	0.535	5.74143e-06	8.1527e-10	-0.324289	0.244	0.556	1.65867e-05	1.82765e-12	-0.335775	0.173	0.508	3.71836e-08	1.18748e-07	2.63674e-13
Vsnl1	1.46739e-14	-0.716342	0.058	0.49	2.98539e-10	6.10063e-10	-0.415654	0.157	0.434	1.24117e-05	5.30958e-11	-0.454416	0.207	0.55	1.08023e-06	2.87039e-24	-0.831481	0.058	0.517	5.83982e-20	3.95036e-22	-0.607118	0.114	0.496	8.037e-18	4.62747e-10	-0.512864	0.235	0.575	9.41459e-06	2.09209e-14	-0.540751	0.207	0.554	4.25637e-10	2.95904e-15	-0.428854	0.194	0.566	6.02016e-11	6.10063e-10	2.29632e-23
Ptms	8.05019e-14	-0.540589	0.214	0.726	1.63781e-09	3.73595e-16	-0.497732	0.175	0.59	7.6008e-12	1.86306e-12	-0.464036	0.289	0.682	3.7904e-08	4.54552e-19	-0.530757	0.147	0.603	9.24787e-15	8.32553e-18	-0.340936	0.201	0.603	1.69383e-13	7.23098e-14	-0.516592	0.244	0.665	1.47114e-09	1.02611e-17	-0.516324	0.201	0.63	2.08761e-13	4.56555e-18	-0.454177	0.236	0.674	9.28861e-14	1.86306e-12	3.63642e-18
Sncb	3.20808e-10	-0.490154	0.194	0.617	6.52685e-06	7.44391e-16	-0.50741	0.157	0.542	1.51446e-11	2.64501e-08	-0.329128	0.296	0.612	0.000538127	2.04091e-12	-0.344366	0.173	0.55	4.15222e-08	3.16688e-22	-0.540747	0.142	0.554	6.44301e-18	1.10488e-12	-0.516786	0.244	0.648	2.24788e-08	1.82615e-14	-0.442187	0.226	0.601	3.7153e-10	9.69103e-17	-0.442828	0.257	0.67	1.97164e-12	2.64501e-08	2.5335e-21
Marcks	2.41813e-19	-0.839776	0.252	0.788	4.91969e-15	1.20482e-21	-0.703266	0.181	0.639	2.4512e-17	4.04195e-16	-0.59167	0.326	0.738	8.22336e-12	2.06392e-21	-0.70612	0.212	0.678	4.19906e-17	8.41633e-29	-0.73074	0.196	0.66	1.7123e-24	1.20433e-10	-0.518284	0.336	0.679	2.45022e-06	4.01056e-18	-0.60708	0.323	0.706	8.15949e-14	3.10066e-14	-0.429662	0.309	0.695	6.3083e-10	1.20433e-10	6.73306e-28
Rit2	1.54101e-17	-0.649646	0.058	0.559	3.13518e-13	1.60866e-23	-0.702766	0.06	0.507	3.27282e-19	1.15834e-19	-0.646767	0.119	0.574	2.35665e-15	2.92512e-28	-0.865702	0.051	0.556	5.95116e-24	9.61926e-23	-0.532747	0.11	0.509	1.95704e-18	6.29032e-14	-0.522132	0.16	0.572	1.27976e-09	3.3171e-19	-0.529491	0.146	0.571	6.74863e-15	9.72311e-23	-0.591397	0.11	0.536	1.97817e-18	6.29032e-14	2.3401e-27
Ppp2r1a	4.06357e-12	-0.430394	0.097	0.514	8.26733e-08	2.99969e-14	-0.352636	0.096	0.44	6.10288e-10	6.59645e-13	-0.404625	0.163	0.551	1.34205e-08	6.61202e-15	-0.455907	0.096	0.458	1.34522e-10	5.81727e-22	-0.425015	0.087	0.47	1.18352e-17	3.18597e-14	-0.52234	0.143	0.54	6.48186e-10	6.16573e-13	-0.34211	0.183	0.538	1.25442e-08	1.07339e-16	-0.395569	0.141	0.518	2.18381e-12	4.06357e-12	4.65381e-21
Eif4g2	1.04406e-09	-0.425119	0.35	0.832	2.12414e-05	1.63195e-22	-0.660305	0.253	0.721	3.3202e-18	3.10729e-14	-0.466518	0.415	0.8	6.32179e-10	1.57802e-22	-0.671837	0.231	0.736	3.21048e-18	5.27813e-23	-0.535247	0.288	0.724	1.07384e-18	9.66118e-13	-0.522636	0.403	0.772	1.96557e-08	7.11864e-17	-0.502819	0.463	0.801	1.44829e-12	1.18237e-17	-0.420465	0.319	0.751	2.40553e-13	1.04406e-09	4.22251e-22
Zcchc17	2.59733e-11	-0.442661	0.155	0.597	5.28427e-07	3.27764e-11	-0.260391	0.187	0.542	6.66836e-07	6.92395e-16	-0.499339	0.193	0.631	1.40868e-11	3.09705e-16	-0.468017	0.16	0.593	6.30094e-12	5.46196e-17	-0.307952	0.183	0.56	1.11124e-12	5.06072e-14	-0.524709	0.168	0.585	1.0296e-09	4.76495e-16	-0.435686	0.22	0.645	9.69429e-12	6.32424e-17	-0.350906	0.152	0.548	1.28667e-12	3.27764e-11	4.36957e-16
Cox8a	2.41796e-11	-0.457338	0.553	0.922	4.91934e-07	8.77116e-15	-0.419901	0.633	0.867	1.78449e-10	8.06551e-17	-0.467388	0.719	0.921	1.64093e-12	4.82472e-16	-0.488665	0.532	0.854	9.8159e-12	5.52033e-15	-0.364502	0.566	0.872	1.12311e-10	5.43182e-17	-0.525683	0.647	0.894	1.1051e-12	5.08196e-24	-0.54747	0.689	0.894	1.03392e-19	6.50128e-16	-0.406092	0.618	0.881	1.32269e-11	2.41796e-11	4.06557e-23
Cbx5	9.68715e-14	-0.47023	0.155	0.646	1.97085e-09	3.55632e-17	-0.515597	0.175	0.594	7.23533e-13	1.0933e-19	-0.582351	0.222	0.69	2.22433e-15	2.65545e-23	-0.671752	0.135	0.634	5.40251e-19	2.68605e-16	-0.344725	0.215	0.607	5.46477e-12	7.52791e-14	-0.528434	0.252	0.688	1.53155e-09	1.63452e-17	-0.530862	0.274	0.68	3.32543e-13	2.08211e-15	-0.326087	0.199	0.6	4.23605e-11	9.68715e-14	2.12436e-22
Pkig	3.20606e-13	-0.473988	0.117	0.576	6.52273e-09	3.63619e-15	-0.411087	0.145	0.54	7.39784e-11	2.40548e-12	-0.37268	0.178	0.566	4.89394e-08	3.86549e-18	-0.490865	0.096	0.508	7.86433e-14	2.45749e-21	-0.395762	0.114	0.504	4.99976e-17	1.50808e-14	-0.529006	0.168	0.591	3.06818e-10	5.49984e-16	-0.462308	0.171	0.561	1.11894e-11	4.86629e-18	-0.426906	0.105	0.48	9.90046e-14	2.40548e-12	1.96599e-20
Nucks1	3.8929e-15	-0.590827	0.136	0.635	7.92011e-11	1.67064e-15	-0.447523	0.187	0.594	3.39893e-11	9.55528e-14	-0.444645	0.237	0.651	1.94402e-09	1.66376e-17	-0.476077	0.179	0.634	3.38492e-13	3.08615e-21	-0.484022	0.196	0.609	6.27878e-17	2.3415e-14	-0.531262	0.218	0.655	4.76378e-10	2.33103e-17	-0.526492	0.256	0.661	4.74247e-13	6.3053e-14	-0.307183	0.204	0.585	1.28281e-09	9.55528e-14	2.46892e-20
Gnl3l	2.35064e-15	-0.476321	0.175	0.71	4.78238e-11	1.98401e-09	-0.334363	0.325	0.655	4.03648e-05	1.6289e-11	-0.373806	0.407	0.763	3.314e-07	2.04919e-13	-0.406139	0.269	0.712	4.16909e-09	5.3403e-15	-0.307238	0.274	0.677	1.08648e-10	2.81134e-13	-0.532679	0.328	0.743	5.71966e-09	7.63036e-10	-0.276266	0.39	0.742	1.5524e-05	1.42246e-09	-0.291519	0.346	0.713	2.89399e-05	1.98401e-09	1.88051e-14
Rpl28	3.38999e-08	-0.357999	0.379	0.813	0.000689693	1.47575e-15	-0.517468	0.452	0.791	3.00241e-11	3.94973e-15	-0.444689	0.578	0.866	8.03572e-11	2.54979e-18	-0.57865	0.385	0.79	5.18754e-14	4.15689e-16	-0.396404	0.429	0.79	8.45719e-12	7.3031e-17	-0.535353	0.462	0.838	1.48581e-12	2.57309e-20	-0.570422	0.518	0.832	5.23495e-16	1.08784e-16	-0.449962	0.319	0.75	2.21322e-12	3.38999e-08	2.05847e-19
Rtl8b	3.41195e-13	-0.569998	0.175	0.65	6.94162e-09	1.5023e-14	-0.384411	0.145	0.532	3.05643e-10	1.05696e-11	-0.368011	0.244	0.625	2.15039e-07	1.79178e-17	-0.449383	0.128	0.55	3.64537e-13	8.37056e-19	-0.366396	0.137	0.52	1.70299e-14	9.6703e-17	-0.536421	0.151	0.622	1.96742e-12	2.20222e-18	-0.439652	0.171	0.599	4.48041e-14	2.81023e-20	-0.50141	0.162	0.598	5.7174e-16	1.05696e-11	2.24818e-19
Polr1d	9.81415e-14	-0.529494	0.068	0.5	1.99669e-09	1.42385e-10	-0.283878	0.181	0.516	2.89681e-06	2.23315e-17	-0.561833	0.148	0.589	4.54333e-13	1.75537e-15	-0.419381	0.103	0.479	3.57131e-11	1.25309e-18	-0.419935	0.114	0.468	2.54942e-14	1.15166e-14	-0.540107	0.16	0.583	2.34305e-10	1.0512e-16	-0.465269	0.152	0.54	2.13867e-12	1.21708e-14	-0.260581	0.105	0.439	2.47614e-10	1.42385e-10	1.00247e-17
Ptges3	2.9019e-09	-0.318127	0.233	0.69	5.90391e-05	2.79932e-20	-0.596041	0.169	0.624	5.69522e-16	4.08158e-08	-0.260251	0.326	0.66	0.000830398	1.53396e-12	-0.326804	0.212	0.622	3.12085e-08	1.48888e-14	-0.305493	0.237	0.615	3.02913e-10	9.99579e-15	-0.541118	0.202	0.647	2.03364e-10	4.81078e-10	-0.356105	0.348	0.668	9.78752e-06	2.29422e-17	-0.439856	0.188	0.607	4.66759e-13	4.08158e-08	2.23946e-19
Prkar1b	3.9818e-13	-0.602429	0.282	0.775	8.10097e-09	1.70626e-21	-0.686312	0.235	0.668	3.47138e-17	6.45322e-13	-0.474837	0.481	0.782	1.31291e-08	2.12258e-19	-0.629601	0.263	0.705	4.3184e-15	1.25185e-21	-0.571868	0.274	0.698	2.5469e-17	2.61785e-13	-0.545487	0.403	0.769	5.32601e-09	3.61478e-13	-0.390208	0.463	0.763	7.35428e-09	4.92253e-16	-0.456372	0.351	0.733	1.00149e-11	6.45322e-13	1.00148e-20
Pitpna	4.70412e-13	-0.499566	0.058	0.469	9.57052e-09	1.27874e-16	-0.433316	0.06	0.421	2.6016e-12	5.02484e-14	-0.454084	0.119	0.496	1.0223e-09	3.35207e-17	-0.517731	0.058	0.431	6.81978e-13	3.59218e-19	-0.387159	0.087	0.434	7.3083e-15	2.47574e-14	-0.547575	0.126	0.529	5.0369e-10	5.47568e-15	-0.339126	0.14	0.513	1.11403e-10	5.47188e-16	-0.324263	0.136	0.508	1.11325e-11	4.70412e-13	2.87375e-18
Snap47	1.10825e-13	-0.471394	0.107	0.567	2.25473e-09	9.67383e-18	-0.476469	0.096	0.497	1.96814e-13	1.17665e-13	-0.469943	0.2	0.603	2.3939e-09	2.92164e-18	-0.531788	0.09	0.5	5.94407e-14	2.0313e-19	-0.408461	0.119	0.488	4.13268e-15	3.29506e-15	-0.55073	0.16	0.592	6.7038e-11	4.89527e-20	-0.546251	0.146	0.577	9.95943e-16	3.16493e-18	-0.376601	0.157	0.569	6.43904e-14	1.17665e-13	3.91622e-19
Tcf25	1.21904e-13	-0.530923	0.252	0.741	2.48014e-09	7.29339e-14	-0.431854	0.289	0.685	1.48384e-09	1.45967e-10	-0.405013	0.474	0.775	2.96969e-06	1.38441e-19	-0.600859	0.25	0.722	2.81658e-15	6.81962e-25	-0.571226	0.228	0.684	1.38745e-20	1.56127e-15	-0.552122	0.361	0.765	3.17641e-11	9.95968e-13	-0.416818	0.451	0.765	2.0263e-08	6.34409e-17	-0.480893	0.33	0.727	1.2907e-12	1.45967e-10	5.45569e-24
Ina	7.29887e-18	-0.760562	0.097	0.615	1.48495e-13	9.25878e-15	-0.50367	0.187	0.559	1.8837e-10	1.02865e-12	-0.45943	0.252	0.633	2.0928e-08	6.97793e-16	-0.498469	0.167	0.583	1.41966e-11	2.27566e-21	-0.481337	0.151	0.554	4.62983e-17	1.41608e-15	-0.555199	0.227	0.665	2.88102e-11	3.78667e-16	-0.48796	0.256	0.646	7.70399e-12	6.98337e-20	-0.472825	0.168	0.589	1.42077e-15	1.02865e-12	1.82053e-20
Rpl22	3.64729e-12	-0.383428	0.146	0.604	7.42042e-08	2.30071e-13	-0.375555	0.223	0.61	4.68079e-09	7.0745e-13	-0.436431	0.311	0.7	1.43931e-08	9.25375e-21	-0.591456	0.147	0.627	1.88268e-16	8.464e-22	-0.410604	0.174	0.606	1.722e-17	1.53851e-15	-0.556209	0.21	0.661	3.1301e-11	8.0589e-23	-0.625878	0.207	0.667	1.63958e-18	1.78138e-16	-0.359794	0.147	0.532	3.62423e-12	3.64729e-12	6.44712e-22
Hnrnpa0	3.05015e-14	-0.450923	0.058	0.494	6.20553e-10	7.25585e-20	-0.570743	0.054	0.448	1.4762e-15	3.22738e-11	-0.342429	0.156	0.512	6.56611e-07	4.21018e-15	-0.386349	0.096	0.466	8.56561e-11	1.09296e-23	-0.561017	0.068	0.449	2.22362e-19	4.07053e-15	-0.556617	0.101	0.516	8.28149e-11	1.26761e-19	-0.511696	0.116	0.533	2.57895e-15	1.1616e-22	-0.557201	0.079	0.492	2.36327e-18	3.22738e-11	8.74367e-23
Rpl7a	6.21601e-15	-0.580278	0.214	0.757	1.26465e-10	2.08663e-15	-0.517122	0.367	0.734	4.24524e-11	6.08104e-20	-0.681565	0.444	0.818	1.23719e-15	8.6075e-24	-0.716863	0.256	0.751	1.7512e-19	3.90687e-23	-0.557287	0.292	0.73	7.94853e-19	7.25491e-15	-0.557814	0.462	0.806	1.47601e-10	6.49854e-18	-0.533542	0.384	0.776	1.32213e-13	1.30216e-17	-0.403631	0.241	0.675	2.64924e-13	7.25491e-15	6.886e-23
Rpl15	1.83878e-13	-0.584763	0.398	0.84	3.741e-09	4.15679e-23	-0.685652	0.428	0.793	8.45699e-19	7.88846e-22	-0.658235	0.6	0.862	1.60491e-17	9.17353e-22	-0.700631	0.385	0.799	1.86636e-17	4.20452e-33	-0.733015	0.361	0.793	8.5541e-29	4.60787e-15	-0.559571	0.639	0.843	9.37472e-11	6.6651e-33	-0.839356	0.445	0.841	1.35601e-28	7.16701e-29	-0.766644	0.33	0.784	1.45813e-24	1.83878e-13	3.36362e-32
Stxbp1	1.05334e-20	-0.886477	0.243	0.789	2.14301e-16	7.44765e-19	-0.643946	0.289	0.698	1.51522e-14	9.46381e-18	-0.605306	0.422	0.796	1.92541e-13	6.28315e-22	-0.692865	0.282	0.746	1.27831e-17	9.66822e-37	-0.87006	0.233	0.73	1.967e-32	4.24658e-15	-0.561368	0.479	0.803	8.63968e-11	1.00015e-26	-0.740097	0.372	0.787	2.0348e-22	2.25426e-23	-0.637037	0.351	0.774	4.58629e-19	4.24658e-15	7.73458e-36
Snap25	2.63977e-14	-0.674007	0.32	0.794	5.37062e-10	4.55626e-13	-0.479772	0.428	0.761	9.26972e-09	5.23821e-16	-0.60133	0.489	0.813	1.06571e-11	2.95057e-13	-0.507124	0.436	0.784	6.00294e-09	1.28384e-14	-0.434997	0.425	0.776	2.61197e-10	7.66673e-13	-0.56182	0.479	0.805	1.5598e-08	5.01743e-16	-0.520939	0.482	0.817	1.0208e-11	5.04943e-19	-0.546669	0.419	0.786	1.02731e-14	7.66673e-13	4.03955e-18
Ftl1	1.01922e-20	-0.784782	0.35	0.879	2.0736e-16	3.41413e-15	-0.525086	0.422	0.776	6.94604e-11	1.36169e-18	-0.623122	0.511	0.845	2.77037e-14	1.46654e-12	-0.430077	0.385	0.764	2.98368e-08	5.4212e-19	-0.50073	0.37	0.766	1.10294e-14	4.68812e-14	-0.561924	0.521	0.839	9.53797e-10	7.83608e-24	-0.691892	0.409	0.792	1.59425e-19	1.75814e-13	-0.400352	0.429	0.797	3.57694e-09	1.46654e-12	6.26886e-23
Scoc	1.06502e-15	-0.657668	0.214	0.738	2.16678e-11	8.97759e-28	-0.811998	0.157	0.666	1.82649e-23	3.03524e-08	-0.334958	0.43	0.744	0.00061752	9.31971e-21	-0.562681	0.199	0.685	1.8961e-16	5.82054e-24	-0.556073	0.21	0.672	1.18419e-19	4.37649e-15	-0.564272	0.286	0.727	8.90397e-11	4.8408e-15	-0.438565	0.329	0.73	9.84861e-11	2.15941e-16	-0.389713	0.241	0.661	4.39332e-12	3.03524e-08	7.18207e-27
Zmat2	1.10656e-13	-0.466896	0.049	0.464	2.2513e-09	1.02882e-12	-0.334154	0.127	0.465	2.09314e-08	2.43745e-13	-0.438274	0.148	0.53	4.95898e-09	2.22675e-19	-0.574253	0.077	0.494	4.53032e-15	2.21426e-16	-0.316706	0.123	0.466	4.50491e-12	2.10964e-16	-0.566972	0.101	0.551	4.29206e-12	3.7262e-17	-0.465427	0.134	0.525	7.58095e-13	1.04266e-22	-0.567537	0.042	0.431	2.12129e-18	1.02882e-12	8.34128e-22
Rpl36al	7.30508e-17	-0.637315	0.146	0.692	1.48622e-12	2.27833e-13	-0.390855	0.271	0.664	4.63525e-09	2.31486e-11	-0.431525	0.333	0.707	4.70958e-07	5.59093e-16	-0.439541	0.205	0.655	1.13748e-11	6.72264e-22	-0.460847	0.187	0.625	1.36772e-17	5.11987e-15	-0.567046	0.202	0.642	1.04164e-10	2.99467e-21	-0.614625	0.177	0.632	6.09266e-17	2.77513e-15	-0.381583	0.215	0.611	5.64601e-11	2.31486e-11	5.37811e-21
Tma7	1.36695e-14	-0.568859	0.379	0.869	2.78106e-10	6.26297e-18	-0.529837	0.422	0.778	1.2742e-13	7.41517e-10	-0.371515	0.615	0.851	1.50862e-05	3.7773e-11	-0.316547	0.436	0.791	7.68492e-07	1.21376e-11	-0.329773	0.443	0.787	2.46939e-07	3.0834e-16	-0.572603	0.454	0.828	6.27317e-12	7.259e-20	-0.557431	0.5	0.817	1.47684e-15	1.88072e-16	-0.416335	0.377	0.784	3.82633e-12	7.41517e-10	5.8072e-19
Eif5a	8.08429e-18	-0.72843	0.107	0.636	1.64475e-13	9.36656e-22	-0.619307	0.139	0.607	1.90563e-17	8.70666e-14	-0.452292	0.259	0.669	1.77137e-09	1.32786e-20	-0.590515	0.128	0.592	2.70153e-16	4.86008e-20	-0.389144	0.169	0.578	9.88783e-16	7.87302e-16	-0.57267	0.218	0.698	1.60177e-11	1.71111e-17	-0.527123	0.232	0.649	3.48125e-13	1.43719e-28	-0.677257	0.105	0.592	2.92397e-24	8.70666e-14	1.14975e-27
Rps26	1.3097e-16	-0.684644	0.379	0.862	2.66459e-12	9.81255e-11	-0.345861	0.524	0.794	1.99636e-06	1.2226e-21	-0.572101	0.644	0.876	2.48739e-17	7.07122e-22	-0.643028	0.423	0.828	1.43864e-17	2.27363e-17	-0.443864	0.475	0.811	4.62569e-13	1.42463e-17	-0.574174	0.639	0.857	2.89841e-13	1.48549e-29	-0.746616	0.463	0.84	3.02224e-25	5.9958e-27	-0.691729	0.372	0.792	1.21985e-22	9.81255e-11	1.18839e-28
Chd3	9.38783e-10	-0.39799	0.32	0.777	1.90995e-05	7.02057e-12	-0.41356	0.355	0.707	1.42834e-07	6.49369e-15	-0.463282	0.422	0.78	1.32114e-10	4.89548e-23	-0.714685	0.263	0.753	9.95986e-19	3.49171e-25	-0.592281	0.283	0.731	7.10389e-21	7.29309e-15	-0.574911	0.353	0.77	1.48378e-10	7.87188e-18	-0.536222	0.421	0.776	1.60153e-13	7.85975e-13	-0.355399	0.335	0.722	1.59907e-08	9.38783e-10	2.79337e-24
Fth1	1.66847e-20	-0.686797	0.777	0.962	3.39451e-16	1.0413e-15	-0.429971	0.904	0.961	2.11853e-11	5.97659e-22	-0.517718	0.919	0.972	1.21594e-17	2.85735e-21	-0.551567	0.833	0.937	5.81327e-17	2.02005e-23	-0.466463	0.822	0.948	4.10979e-19	2.0528e-22	-0.580715	0.933	0.965	4.17642e-18	2.8596e-40	-0.82534	0.848	0.965	5.81786e-36	3.8963e-14	-0.311231	0.89	0.96	7.92702e-10	3.8963e-14	2.28768e-39
Clip3	8.74256e-22	-0.868406	0.107	0.694	1.77867e-17	9.41083e-25	-0.715444	0.102	0.584	1.91463e-20	1.82023e-25	-0.842123	0.2	0.698	3.70326e-21	1.25634e-26	-0.734466	0.103	0.625	2.55602e-22	6.08352e-34	-0.776277	0.114	0.611	1.23769e-29	5.14045e-17	-0.582464	0.21	0.668	1.04582e-12	2.12642e-28	-0.803623	0.177	0.663	4.3262e-24	9.24253e-15	-0.45024	0.277	0.658	1.88039e-10	9.24253e-15	4.86682e-33
Rpl7	1.78968e-20	-0.838282	0.243	0.813	3.64111e-16	2.28656e-22	-0.644318	0.47	0.797	4.652e-18	1.89874e-24	-0.71835	0.578	0.873	3.86298e-20	1.75265e-24	-0.71696	0.417	0.812	3.56576e-20	2.58847e-23	-0.576798	0.434	0.797	5.26625e-19	2.23029e-17	-0.584573	0.605	0.87	4.53753e-13	6.73535e-28	-0.706057	0.476	0.838	1.37031e-23	1.74671e-20	-0.531748	0.304	0.739	3.55368e-16	2.23029e-17	5.38828e-27
Brk1	1.34896e-11	-0.437303	0.146	0.583	2.74445e-07	3.55074e-16	-0.393001	0.133	0.54	7.22398e-12	1.73246e-16	-0.494624	0.156	0.596	3.52468e-12	6.94744e-14	-0.32638	0.135	0.515	1.41346e-09	1.3803e-20	-0.360795	0.119	0.513	2.80821e-16	3.99117e-16	-0.584602	0.143	0.587	8.12003e-12	9.97459e-12	-0.309932	0.201	0.549	2.02933e-07	8.89801e-17	-0.365726	0.136	0.525	1.8103e-12	1.34896e-11	1.10424e-19
Pafah1b1	2.21731e-19	-0.697732	0.194	0.782	4.51111e-15	4.70657e-20	-0.639127	0.253	0.686	9.57551e-16	1.46788e-18	-0.622466	0.378	0.768	2.9864e-14	9.9511e-16	-0.459876	0.288	0.725	2.02455e-11	3.31161e-25	-0.582277	0.224	0.699	6.73746e-21	1.45434e-14	-0.585459	0.387	0.758	2.95885e-10	1.05103e-18	-0.559128	0.366	0.782	2.13832e-14	6.53834e-23	-0.578176	0.246	0.713	1.33022e-18	1.45434e-14	2.64929e-24
Mt3	9.11127e-08	-0.388296	0.437	0.818	0.00185369	1.89743e-13	-0.462904	0.38	0.722	3.86032e-09	5.21695e-12	-0.474528	0.459	0.799	1.06139e-07	5.97091e-13	-0.45712	0.295	0.698	1.21478e-08	4.17668e-13	-0.293355	0.329	0.703	8.49746e-09	8.9065e-15	-0.58909	0.471	0.808	1.81203e-10	8.3718e-15	-0.490349	0.384	0.757	1.70324e-10	3.22004e-07	-0.293428	0.581	0.833	0.00655118	3.22004e-07	6.69744e-14
Calm3	2.81029e-15	-0.675485	0.32	0.815	5.71754e-11	2.89797e-18	-0.616671	0.307	0.707	5.89591e-14	8.44798e-15	-0.526952	0.474	0.806	1.71874e-10	2.23742e-27	-0.837712	0.192	0.714	4.55204e-23	2.98034e-24	-0.530443	0.292	0.73	6.0635e-20	4.93532e-15	-0.591583	0.42	0.804	1.00409e-10	2.24559e-26	-0.721554	0.354	0.786	4.56866e-22	4.36684e-26	-0.693229	0.293	0.747	8.88435e-22	8.44798e-15	1.78994e-26
Tspyl1	1.03307e-14	-0.432735	0.107	0.589	2.10178e-10	1.73498e-18	-0.520809	0.127	0.541	3.52981e-14	5.05064e-14	-0.448476	0.222	0.619	1.02755e-09	6.37627e-14	-0.388262	0.173	0.568	1.29725e-09	3.89383e-23	-0.467596	0.128	0.554	7.92199e-19	5.26206e-17	-0.594546	0.168	0.626	1.07057e-12	1.5094e-19	-0.540638	0.189	0.619	3.07088e-15	1.89546e-16	-0.395389	0.183	0.584	3.85631e-12	6.37627e-14	3.11506e-22
Sqstm1	3.69249e-13	-0.492364	0.078	0.508	7.51237e-09	4.40043e-18	-0.505676	0.078	0.469	8.95268e-14	1.85184e-12	-0.426843	0.193	0.575	3.76756e-08	2.46801e-18	-0.486389	0.09	0.505	5.02117e-14	8.2316e-28	-0.584147	0.059	0.479	1.67472e-23	9.63322e-16	-0.59559	0.134	0.552	1.95988e-11	1.29137e-17	-0.467504	0.165	0.551	2.62728e-13	4.11941e-24	-0.585768	0.079	0.509	8.38094e-20	1.85184e-12	6.58528e-27
Rpl27a	6.0328e-16	-0.58766	0.631	0.937	1.22737e-11	3.80673e-22	-0.506975	0.843	0.938	7.74479e-18	7.15107e-29	-0.638673	0.896	0.959	1.45489e-24	1.86789e-31	-0.69445	0.75	0.928	3.80022e-27	2.36747e-33	-0.568873	0.767	0.926	4.81662e-29	7.37712e-25	-0.597841	0.857	0.952	1.50087e-20	5.87427e-40	-0.781717	0.817	0.938	1.19512e-35	2.06166e-25	-0.606721	0.644	0.875	4.19445e-21	6.0328e-16	4.69942e-39
Eif4a2	8.99547e-19	-0.810146	0.466	0.873	1.83013e-14	3.38052e-29	-0.824674	0.53	0.848	6.87766e-25	1.33662e-23	-0.68863	0.711	0.897	2.71935e-19	8.79216e-30	-0.883825	0.442	0.83	1.78877e-25	6.14345e-36	-0.810634	0.461	0.834	1.24988e-31	8.6017e-18	-0.601246	0.739	0.879	1.75002e-13	6.53459e-38	-0.892848	0.549	0.877	1.32946e-33	4.13656e-20	-0.566618	0.55	0.844	8.41583e-16	8.6017e-18	5.22767e-37
Nnat	4.39428e-09	-0.757293	0.35	0.72	8.94017e-05	5.4221e-15	-0.627707	0.277	0.648	1.10313e-10	6.49915e-08	-0.50189	0.444	0.725	0.00132225	4.85382e-16	-0.630095	0.263	0.664	9.8751e-12	1.14165e-18	-0.612889	0.26	0.641	2.32268e-14	3.30606e-08	-0.604141	0.37	0.662	0.000672618	4.67017e-09	-0.532435	0.415	0.672	9.50146e-05	6.74706e-11	-0.39924	0.44	0.775	1.37269e-06	6.49915e-08	9.13316e-18
Btf3	1.13366e-12	-0.500692	0.107	0.539	2.30642e-08	1.48436e-15	-0.454005	0.163	0.56	3.01992e-11	1.89746e-22	-0.740604	0.178	0.657	3.86037e-18	1.07195e-21	-0.63285	0.109	0.568	2.18089e-17	1.51728e-29	-0.635551	0.091	0.556	3.08691e-25	4.33344e-18	-0.604485	0.185	0.675	8.81638e-14	3.56851e-22	-0.573569	0.14	0.595	7.26014e-18	1.15474e-20	-0.478854	0.115	0.533	2.34932e-16	1.13366e-12	1.21383e-28
Tubb5	5.17425e-11	-0.357509	0.194	0.661	1.0527e-06	1.65029e-14	-0.45773	0.223	0.62	3.35752e-10	1.05479e-08	-0.332824	0.356	0.707	0.000214597	4.76026e-18	-0.46244	0.154	0.605	9.68475e-14	4.19478e-26	-0.60621	0.16	0.611	8.53428e-22	1.96214e-14	-0.6049	0.319	0.722	3.99196e-10	1.44458e-13	-0.397636	0.28	0.656	2.939e-09	5.36333e-18	-0.405477	0.204	0.625	1.09117e-13	1.05479e-08	3.35583e-25
Eif3h	1.25052e-18	-0.798052	0.126	0.664	2.54418e-14	7.75078e-22	-0.696483	0.169	0.634	1.5769e-17	1.57892e-15	-0.524852	0.289	0.727	3.21232e-11	2.71894e-17	-0.532495	0.224	0.67	5.53168e-13	4.19454e-23	-0.550684	0.205	0.646	8.5338e-19	2.31333e-15	-0.607133	0.303	0.748	4.70646e-11	4.70277e-22	-0.627421	0.244	0.694	9.56779e-18	3.16275e-27	-0.676835	0.099	0.575	6.43461e-23	2.31333e-15	2.5302e-26
Tpt1	6.17729e-17	-0.717446	0.223	0.756	1.25677e-12	4.48664e-20	-0.69184	0.349	0.744	9.12808e-16	1.66181e-17	-0.628199	0.459	0.821	3.38095e-13	2.83898e-23	-0.713937	0.224	0.736	5.7759e-19	3.34805e-25	-0.579059	0.265	0.72	6.8116e-21	1.57602e-16	-0.607711	0.412	0.799	3.20641e-12	2.09311e-26	-0.769098	0.36	0.785	4.25843e-22	2.89721e-24	-0.62948	0.209	0.679	5.89437e-20	1.57602e-16	1.67449e-25
Ppp1cb	5.70262e-11	-0.380204	0.214	0.676	1.1602e-06	2.30796e-18	-0.552423	0.169	0.601	4.69554e-14	1.44381e-09	-0.33962	0.296	0.652	2.93744e-05	5.42252e-12	-0.284867	0.212	0.603	1.10321e-07	9.96898e-19	-0.388684	0.196	0.606	2.02819e-14	1.23784e-17	-0.609108	0.176	0.639	2.51838e-13	2.00755e-15	-0.419982	0.268	0.66	4.08436e-11	1.53227e-18	-0.460741	0.204	0.638	3.11739e-14	1.44381e-09	7.97519e-18
Set	8.78661e-23	-0.893507	0.146	0.752	1.78764e-18	2.96832e-22	-0.699961	0.217	0.676	6.03905e-18	1.64018e-17	-0.507357	0.333	0.757	3.33696e-13	3.09287e-16	-0.530699	0.282	0.706	6.29245e-12	5.61804e-34	-0.775928	0.187	0.689	1.14299e-29	1.91979e-15	-0.61236	0.395	0.783	3.90581e-11	5.21869e-28	-0.767507	0.293	0.762	1.06174e-23	1.16889e-22	-0.621659	0.236	0.698	2.3781e-18	1.91979e-15	4.49443e-33
Eif3k	4.52036e-08	-0.29691	0.184	0.564	0.000919667	8.07713e-22	-0.593949	0.127	0.597	1.64329e-17	3.20851e-17	-0.607187	0.23	0.672	6.52772e-13	3.80061e-16	-0.413787	0.179	0.616	7.73234e-12	7.37754e-25	-0.514425	0.151	0.596	1.50096e-20	7.17748e-18	-0.613928	0.202	0.689	1.46026e-13	1.80874e-20	-0.560649	0.177	0.627	3.67987e-16	3.33648e-18	-0.413472	0.136	0.536	6.78808e-14	4.52036e-08	5.90203e-24
Bex1	7.93145e-18	-0.698478	0.097	0.621	1.61365e-13	2.93974e-16	-0.434017	0.199	0.606	5.98089e-12	3.14839e-17	-0.607436	0.274	0.701	6.4054e-13	5.70228e-21	-0.627361	0.179	0.659	1.16013e-16	6.659e-24	-0.485728	0.174	0.627	1.35477e-19	1.60369e-16	-0.620413	0.244	0.702	3.26271e-12	5.66762e-24	-0.675082	0.177	0.65	1.15308e-19	1.40741e-23	-0.582568	0.141	0.605	2.86338e-19	2.93974e-16	4.5341e-23
Cbx3	2.0451e-13	-0.451945	0.117	0.576	4.16076e-09	5.09108e-13	-0.554413	0.223	0.579	1.03578e-08	1.07031e-16	-0.645124	0.193	0.617	2.17754e-12	2.07154e-13	-0.530727	0.192	0.569	4.21455e-09	9.80266e-15	-0.396424	0.228	0.576	1.99435e-10	8.46368e-15	-0.620939	0.218	0.657	1.72194e-10	3.23363e-10	-0.4148	0.293	0.619	6.57883e-06	1.00841e-09	-0.350209	0.314	0.636	2.0516e-05	1.00841e-09	8.56247e-16
Eid1	2.93474e-15	-0.598987	0.194	0.724	5.97073e-11	9.62637e-21	-0.667049	0.157	0.603	1.95848e-16	5.50147e-16	-0.529481	0.296	0.728	1.11927e-11	9.28828e-26	-0.745125	0.128	0.647	1.8897e-21	6.24562e-19	-0.432769	0.224	0.636	1.27067e-14	2.4683e-16	-0.624074	0.227	0.684	5.02175e-12	1.03985e-20	-0.528378	0.256	0.696	2.11558e-16	3.50259e-21	-0.536966	0.209	0.665	7.12603e-17	2.93474e-15	7.43062e-25
Spin1	2.29276e-13	-0.425525	0.107	0.559	4.66462e-09	2.87369e-15	-0.429974	0.151	0.538	5.84653e-11	9.87367e-12	-0.426985	0.252	0.633	2.0088e-07	5.82396e-17	-0.45474	0.141	0.562	1.18488e-12	2.05363e-20	-0.429042	0.146	0.541	4.17811e-16	3.40152e-16	-0.624808	0.168	0.618	6.92039e-12	3.8057e-18	-0.47173	0.183	0.602	7.7427e-14	1.28294e-23	-0.549243	0.141	0.596	2.61014e-19	9.87367e-12	1.02635e-22
Eef1g	1.67862e-20	-0.854187	0.359	0.864	3.41515e-16	1.03627e-25	-0.751794	0.554	0.821	2.10829e-21	2.19734e-21	-0.604873	0.674	0.885	4.47048e-17	5.91324e-32	-0.902135	0.417	0.816	1.20305e-27	5.00765e-33	-0.732937	0.461	0.814	1.01881e-28	3.16659e-21	-0.625621	0.689	0.89	6.44242e-17	5.19625e-35	-0.863464	0.518	0.855	1.05718e-30	3.14653e-22	-0.658214	0.377	0.778	6.40162e-18	1.67862e-20	4.157e-34
Cox4i1	3.68312e-14	-0.58776	0.447	0.882	7.4933e-10	3.45841e-19	-0.543206	0.53	0.843	7.03614e-15	2.45844e-28	-0.700711	0.63	0.896	5.00169e-24	6.31452e-23	-0.671594	0.474	0.841	1.28469e-18	3.82015e-21	-0.48896	0.534	0.834	7.7721e-17	9.55373e-20	-0.625787	0.613	0.875	1.94371e-15	9.17974e-24	-0.594643	0.634	0.874	1.86762e-19	3.93451e-17	-0.437351	0.565	0.854	8.00476e-13	3.68312e-14	1.96675e-27
Ywhae	3.66589e-12	-0.537424	0.398	0.829	7.45826e-08	5.24842e-20	-0.616619	0.343	0.731	1.06779e-15	1.37189e-19	-0.589554	0.474	0.807	2.79111e-15	7.01834e-25	-0.756123	0.237	0.742	1.42788e-20	5.47445e-26	-0.620969	0.269	0.724	1.11378e-21	1.93243e-18	-0.637629	0.412	0.791	3.93152e-14	4.23577e-22	-0.624731	0.421	0.791	8.61768e-18	3.45385e-39	-0.93835	0.209	0.759	7.02685e-35	3.66589e-12	2.76308e-38
Pea15a	1.28498e-20	-0.841217	0.175	0.764	2.61429e-16	3.46534e-13	-0.479785	0.277	0.659	7.05024e-09	5.29989e-12	-0.466801	0.363	0.721	1.07826e-07	7.39561e-16	-0.521367	0.199	0.619	1.50464e-11	1.7089e-20	-0.45566	0.201	0.621	3.47675e-16	3.54215e-16	-0.638003	0.286	0.708	7.2065e-12	1.03709e-12	-0.436115	0.36	0.706	2.10995e-08	4.29838e-16	-0.423652	0.267	0.681	8.74506e-12	5.29989e-12	1.02798e-19
Rnf11	2.06623e-11	-0.425264	0.252	0.732	4.20374e-07	4.56229e-20	-0.636919	0.205	0.646	9.28197e-16	1.43e-19	-0.613593	0.267	0.729	2.90934e-15	5.34098e-18	-0.550981	0.224	0.684	1.08662e-13	1.62304e-21	-0.463196	0.219	0.659	3.30207e-17	3.6711e-17	-0.639147	0.328	0.776	7.46885e-13	8.7319e-21	-0.596483	0.293	0.736	1.7765e-16	9.44255e-18	-0.460304	0.272	0.697	1.92109e-13	2.06623e-11	1.29843e-20
Calm1	9.42102e-20	-0.789969	0.34	0.868	1.91671e-15	9.93198e-28	-0.844201	0.392	0.768	2.02066e-23	2.46291e-22	-0.637414	0.6	0.867	5.0108e-18	2.28281e-32	-0.91673	0.34	0.802	4.64439e-28	1.58863e-37	-0.831631	0.356	0.798	3.23206e-33	3.4471e-18	-0.640675	0.521	0.83	7.01312e-14	3.24711e-32	-0.760779	0.518	0.847	6.60625e-28	3.22057e-28	-0.671389	0.524	0.844	6.55224e-24	3.4471e-18	1.2709e-36
Six3	8.54709e-07	-0.642056	0.019	0.229	0.0173891	9.34821e-10	-0.562838	0.012	0.211	1.90189e-05	8.81128e-08	-0.556835	0.007	0.192	0.00179266	2.31137e-08	-0.576684	0.013	0.193	0.000470247	4.52667e-09	-0.486909	0.018	0.17	9.2095e-05	2.75818e-08	-0.642711	0.025	0.249	0.000561153	5.25832e-09	-0.509361	0.024	0.217	0.000106981	5.24052e-11	-0.534441	0.026	0.234	1.06618e-06	8.54709e-07	4.19242e-10
Rpsa	2.94407e-19	-0.810548	0.282	0.838	5.98972e-15	4.9785e-23	-0.711234	0.524	0.808	1.01288e-18	7.23193e-27	-0.77269	0.563	0.878	1.47134e-22	8.27501e-29	-0.87792	0.397	0.799	1.68355e-24	1.68326e-27	-0.664561	0.443	0.79	3.42458e-23	9.11989e-19	-0.651049	0.555	0.862	1.85544e-14	4.15281e-32	-0.828096	0.512	0.835	8.4489e-28	1.19968e-25	-0.71286	0.293	0.745	2.44075e-21	9.11989e-19	3.32225e-31
Camk2n1	2.25655e-14	-0.722551	0.126	0.587	4.59095e-10	7.82601e-18	-0.651872	0.102	0.487	1.5922e-13	6.91049e-10	-0.447844	0.244	0.566	1.40594e-05	2.2825e-15	-0.494939	0.128	0.518	4.64375e-11	2.17111e-27	-0.72711	0.105	0.535	4.41712e-23	4.3146e-14	-0.653109	0.218	0.617	8.77806e-10	1.95853e-22	-0.759536	0.128	0.561	3.98462e-18	2.89893e-26	-0.840868	0.204	0.664	5.89788e-22	6.91049e-10	1.73689e-26
Ppp2ca	4.63775e-13	-0.49878	0.165	0.653	9.43549e-09	1.32564e-13	-0.351182	0.175	0.564	2.69701e-09	3.05614e-10	-0.37521	0.289	0.639	6.21772e-06	6.47266e-14	-0.418311	0.179	0.584	1.31686e-09	1.84631e-21	-0.408153	0.155	0.571	3.75633e-17	2.00557e-18	-0.654997	0.168	0.643	4.08033e-14	1.4058e-12	-0.341959	0.262	0.658	2.8601e-08	9.07416e-18	-0.397726	0.188	0.61	1.84614e-13	3.05614e-10	1.47705e-20
Rab6a	7.53897e-19	-0.799255	0.252	0.795	1.5338e-14	3.76125e-20	-0.653255	0.289	0.702	7.65225e-16	5.31664e-15	-0.512796	0.407	0.797	1.08167e-10	1.53564e-27	-0.848149	0.237	0.75	3.12426e-23	7.1737e-28	-0.664826	0.251	0.726	1.45949e-23	1.12513e-17	-0.655818	0.336	0.771	2.28908e-13	4.41477e-22	-0.629373	0.402	0.795	8.98185e-18	2.9603e-20	-0.555177	0.33	0.741	6.02273e-16	5.31664e-15	5.73896e-27
Rpl10a	4.72599e-07	-0.339157	0.447	0.839	0.00961503	2.22869e-08	-0.274744	0.608	0.814	0.000453426	9.26885e-18	-0.53651	0.689	0.88	1.88575e-13	4.65396e-16	-0.531119	0.468	0.806	9.46849e-12	1.02388e-15	-0.410856	0.484	0.806	2.08309e-11	3.28581e-22	-0.657004	0.563	0.881	6.68498e-18	1.52693e-15	-0.465788	0.634	0.848	3.10653e-11	8.23711e-08	-0.282606	0.518	0.799	0.00167584	4.72599e-07	2.62865e-21
Serp2	2.21107e-12	-0.522009	0.272	0.772	4.49842e-08	2.10382e-17	-0.523299	0.241	0.673	4.28021e-13	3.76982e-07	-0.277327	0.526	0.779	0.00766971	8.40404e-13	-0.424953	0.314	0.715	1.7098e-08	9.06827e-17	-0.411305	0.301	0.706	1.84494e-12	9.75172e-19	-0.661943	0.319	0.77	1.98399e-14	9.4894e-19	-0.521773	0.329	0.746	1.93062e-14	3.22661e-18	-0.500506	0.283	0.702	6.56454e-14	3.76982e-07	7.59152e-18
Atp6v1a	4.18036e-23	-0.912023	0.175	0.773	8.50495e-19	1.51769e-23	-0.760926	0.199	0.658	3.08774e-19	4.28878e-11	-0.38435	0.459	0.779	8.72552e-07	1.37039e-22	-0.729754	0.25	0.72	2.78807e-18	8.83295e-28	-0.67	0.228	0.697	1.79706e-23	1.73041e-16	-0.662461	0.336	0.742	3.52051e-12	1.83771e-22	-0.662994	0.366	0.771	3.73883e-18	1.07038e-31	-0.794964	0.22	0.728	2.17768e-27	4.28878e-11	8.56302e-31
Tbca	3.28417e-14	-0.558248	0.165	0.659	6.68165e-10	6.63825e-09	-0.298183	0.289	0.615	0.000135055	2.98036e-17	-0.590472	0.274	0.701	6.06354e-13	2.23975e-19	-0.489156	0.167	0.635	4.55678e-15	4.74491e-16	-0.39092	0.228	0.609	9.65352e-12	9.7707e-19	-0.662538	0.227	0.703	1.98785e-14	1.62147e-19	-0.518571	0.213	0.67	3.29888e-15	1.24121e-15	-0.363012	0.188	0.586	2.52524e-11	6.63825e-09	1.29718e-18
Peg3	1.54979e-25	-0.916269	0.466	0.893	3.15304e-21	2.12484e-29	-0.824292	0.578	0.822	4.32299e-25	2.71302e-20	-0.563203	0.674	0.901	5.51964e-16	1.15671e-30	-0.799901	0.487	0.854	2.35332e-26	5.41194e-42	-0.851629	0.493	0.834	1.10106e-37	1.65489e-20	-0.663165	0.613	0.862	3.36688e-16	2.94986e-22	-0.505377	0.744	0.895	6.0015e-18	1.33824e-20	-0.47943	0.66	0.875	2.72265e-16	2.71302e-20	4.32955e-41
Rplp1	2.72551e-14	-0.523658	0.66	0.935	5.54506e-10	1.22916e-19	-0.504103	0.88	0.929	2.50073e-15	2.84449e-28	-0.634604	0.874	0.966	5.78712e-24	5.86932e-38	-0.816875	0.795	0.934	1.19411e-33	5.08406e-39	-0.654452	0.758	0.937	1.03435e-34	1.32477e-27	-0.664506	0.849	0.952	2.69524e-23	6.30773e-46	-0.823306	0.823	0.953	1.28331e-41	2.35343e-32	-0.701101	0.55	0.868	4.78805e-28	2.72551e-14	5.04618e-45
Dynll2	5.12955e-24	-0.933048	0.291	0.863	1.04361e-19	3.26561e-22	-0.716982	0.416	0.749	6.64388e-18	4.18607e-23	-0.68925	0.541	0.846	8.51656e-19	1.63072e-29	-0.901794	0.276	0.774	3.3177e-25	2.26781e-34	-0.78679	0.333	0.786	4.61385e-30	3.41757e-20	-0.664667	0.521	0.83	6.95305e-16	1.13658e-26	-0.678398	0.512	0.826	2.31238e-22	5.40254e-28	-0.697124	0.445	0.815	1.09915e-23	3.41757e-20	1.81424e-33
Ywhaq	2.39728e-17	-0.727531	0.194	0.736	4.87726e-13	3.55234e-22	-0.680686	0.187	0.655	7.22723e-18	1.02321e-15	-0.547728	0.311	0.741	2.08172e-11	6.50377e-21	-0.642099	0.205	0.684	1.32319e-16	1.32688e-24	-0.586147	0.201	0.664	2.69954e-20	8.72996e-19	-0.665519	0.261	0.715	1.77611e-14	2.43713e-22	-0.569774	0.311	0.743	4.95834e-18	5.66156e-20	-0.518524	0.246	0.705	1.15184e-15	1.02321e-15	1.06151e-23
Hnrnpa1	2.99948e-16	-0.611469	0.184	0.723	6.10245e-12	7.44703e-21	-0.645974	0.217	0.674	1.5151e-16	4.9685e-17	-0.560676	0.333	0.776	1.01084e-12	6.50019e-25	-0.74127	0.199	0.71	1.32246e-20	1.45768e-22	-0.525718	0.237	0.684	2.96565e-18	9.49445e-17	-0.666512	0.328	0.731	1.93165e-12	2.2753e-20	-0.596073	0.299	0.733	4.62911e-16	3.11043e-23	-0.587391	0.178	0.637	6.32818e-19	2.99948e-16	5.20015e-24
Polr2m	1.33578e-15	-0.568718	0.155	0.682	2.71765e-11	6.80938e-18	-0.557281	0.205	0.628	1.38537e-13	2.09375e-13	-0.415863	0.289	0.692	4.25974e-09	2.25566e-13	-0.380687	0.218	0.627	4.58913e-09	1.2393e-19	-0.439272	0.196	0.614	2.52136e-15	2.42407e-19	-0.670817	0.252	0.723	4.93178e-15	1.13155e-21	-0.602984	0.226	0.679	2.30215e-17	3.61137e-24	-0.586172	0.183	0.654	7.34733e-20	2.25566e-13	2.88909e-23
Skp1a	6.97536e-26	-1.11178	0.039	0.646	1.41914e-21	5.65106e-21	-0.646561	0.12	0.56	1.14971e-16	4.3063e-19	-0.613282	0.193	0.653	8.76118e-15	3.6048e-30	-0.829261	0.064	0.598	7.33397e-26	5.32905e-27	-0.601268	0.123	0.58	1.08419e-22	2.68992e-19	-0.671094	0.143	0.617	5.47264e-15	1.66968e-22	-0.517348	0.152	0.626	3.39696e-18	3.13262e-24	-0.591092	0.126	0.579	6.37331e-20	4.3063e-19	2.88384e-29
Tuba1b	1.38509e-09	-0.385303	0.262	0.718	2.81797e-05	6.61268e-18	-0.577807	0.229	0.659	1.34535e-13	2.78991e-11	-0.357143	0.393	0.731	5.67606e-07	1.69832e-21	-0.660777	0.192	0.68	3.45522e-17	1.15869e-27	-0.612836	0.196	0.669	2.35735e-23	3.45895e-16	-0.671944	0.345	0.752	7.03724e-12	6.15049e-13	-0.44073	0.354	0.698	1.25132e-08	7.92594e-17	-0.361726	0.188	0.593	1.61253e-12	1.38509e-09	9.26951e-27
Pfdn2	2.48606e-14	-0.642436	0.243	0.761	5.0579e-10	1.58927e-20	-0.64749	0.307	0.72	3.23337e-16	9.41782e-23	-0.717758	0.4	0.814	1.91606e-18	4.27543e-25	-0.780221	0.269	0.749	8.69836e-21	9.131e-28	-0.661249	0.292	0.738	1.8577e-23	6.67661e-19	-0.672089	0.437	0.818	1.35836e-14	1.4859e-24	-0.679467	0.372	0.799	3.02306e-20	2.51676e-24	-0.647051	0.225	0.717	5.12034e-20	2.48606e-14	7.3048e-27
Vdac1	1.28126e-12	-0.573668	0.146	0.595	2.60672e-08	4.81443e-15	-0.385987	0.145	0.533	9.79495e-11	1.32344e-10	-0.426971	0.259	0.611	2.69253e-06	3.20337e-19	-0.590442	0.109	0.545	6.51725e-15	7.21245e-21	-0.445829	0.142	0.543	1.46737e-16	2.02058e-17	-0.676803	0.176	0.623	4.11086e-13	1.65591e-18	-0.531876	0.195	0.616	3.36895e-14	4.0634e-23	-0.563719	0.168	0.625	8.26698e-19	1.32344e-10	3.25072e-22
Stmn1	2.17833e-20	-0.8395	0.155	0.739	4.43181e-16	4.39039e-23	-0.762145	0.193	0.657	8.93226e-19	1.23162e-25	-0.878056	0.222	0.727	2.50574e-21	2.54032e-25	-0.832958	0.186	0.684	5.16829e-21	1.17814e-29	-0.7124	0.174	0.653	2.39692e-25	7.81888e-17	-0.680896	0.269	0.715	1.59075e-12	9.05169e-26	-0.73206	0.232	0.724	1.84157e-21	4.23079e-13	-0.378905	0.277	0.656	8.60754e-09	4.23079e-13	9.42508e-29
Eef1a1	2.15515e-27	-0.95777	0.67	0.924	4.38466e-23	2.98432e-33	-0.887168	0.819	0.931	6.0716e-29	1.82895e-30	-0.784534	0.911	0.958	3.72099e-26	6.47247e-37	-0.982948	0.744	0.905	1.31682e-32	1.03471e-39	-0.813134	0.753	0.912	2.10513e-35	1.30545e-27	-0.689132	0.933	0.968	2.65594e-23	1.72329e-43	-0.988691	0.841	0.936	3.50603e-39	1.51266e-33	-0.861257	0.634	0.874	3.07752e-29	2.15515e-27	1.37863e-42
Ppia	2.79659e-12	-0.517616	0.272	0.772	5.68967e-08	1.23917e-13	-0.470923	0.295	0.702	2.52109e-09	1.48636e-14	-0.516875	0.385	0.78	3.024e-10	4.98845e-19	-0.470421	0.231	0.707	1.0149e-14	1.685e-14	-0.344406	0.324	0.702	3.42814e-10	2.09851e-18	-0.689798	0.361	0.785	4.26942e-14	8.40079e-16	-0.470443	0.409	0.768	1.70914e-11	5.18935e-23	-0.591558	0.23	0.696	1.05577e-18	2.79659e-12	4.15148e-22
Usmg5	8.04416e-11	-0.437889	0.291	0.773	1.63658e-06	4.89265e-13	-0.407004	0.277	0.672	9.9541e-09	3.11121e-09	-0.379064	0.43	0.752	6.32977e-05	2.31653e-13	-0.394691	0.256	0.682	4.71297e-09	2.69591e-18	-0.406204	0.265	0.69	5.48483e-14	3.16573e-19	-0.695444	0.277	0.742	6.44068e-15	3.26543e-18	-0.49799	0.274	0.705	6.64353e-14	1.25062e-17	-0.410875	0.257	0.69	2.54438e-13	3.11121e-09	2.53259e-18
Map7d2	3.65065e-17	-0.64471	0.117	0.654	7.42725e-13	1.92966e-24	-0.665795	0.09	0.566	3.9259e-20	3.49005e-19	-0.649186	0.185	0.644	7.10051e-15	3.13601e-24	-0.7067	0.135	0.633	6.38022e-20	6.70698e-21	-0.474777	0.178	0.59	1.36453e-16	5.23978e-18	-0.696617	0.193	0.641	1.06603e-13	8.08992e-27	-0.757585	0.171	0.647	1.64589e-22	3.27978e-29	-0.772006	0.126	0.621	6.67271e-25	3.65065e-17	2.62382e-28
Flywch1	2.45631e-18	-0.807221	0.087	0.611	4.99736e-14	7.62129e-17	-0.519811	0.157	0.562	1.55055e-12	4.6538e-11	-0.434175	0.281	0.643	9.46817e-07	2.13726e-17	-0.546075	0.186	0.636	4.34825e-13	1.93615e-26	-0.589121	0.137	0.579	3.93911e-22	1.40628e-18	-0.698756	0.193	0.663	2.86109e-14	2.27175e-15	-0.470897	0.268	0.671	4.62187e-11	4.41312e-21	-0.528343	0.183	0.627	8.97849e-17	4.6538e-11	1.54892e-25
Rpl38	3.80829e-18	-0.624637	0.66	0.939	7.74797e-14	3.06004e-14	-0.324475	0.783	0.919	6.22565e-10	4.7056e-31	-0.69671	0.83	0.954	9.57355e-27	6.25907e-22	-0.53226	0.763	0.904	1.27341e-17	6.75938e-21	-0.404994	0.831	0.932	1.3752e-16	6.28409e-27	-0.702573	0.815	0.937	1.2785e-22	5.1163e-38	-0.781621	0.756	0.931	1.04091e-33	9.53254e-24	-0.557251	0.702	0.901	1.93939e-19	3.06004e-14	4.09304e-37
Slc25a4	7.85195e-17	-0.746288	0.35	0.822	1.59748e-12	8.79182e-20	-0.613516	0.337	0.74	1.78869e-15	2.75131e-23	-0.708577	0.519	0.831	5.59755e-19	2.46361e-25	-0.760095	0.288	0.775	5.01221e-21	8.2678e-23	-0.577656	0.37	0.756	1.68208e-18	1.06938e-20	-0.702619	0.496	0.846	2.17565e-16	6.52863e-28	-0.715275	0.396	0.811	1.32825e-23	2.31576e-31	-0.841326	0.288	0.754	4.71141e-27	7.85195e-17	1.85261e-30
Rpl8	8.88871e-24	-0.873794	0.456	0.919	1.80841e-19	1.47457e-24	-0.59981	0.825	0.912	3.00002e-20	2.43392e-26	-0.591127	0.889	0.955	4.95181e-22	1.52573e-32	-0.804297	0.699	0.897	3.10409e-28	2.00612e-28	-0.566047	0.781	0.911	4.08144e-24	4.40687e-28	-0.703792	0.866	0.946	8.96577e-24	3.85645e-42	-0.830146	0.756	0.935	7.84594e-38	3.11514e-26	-0.627346	0.602	0.865	6.33775e-22	8.88871e-24	3.08516e-41
Camk2n2	1.39341e-16	-0.716305	0.068	0.549	2.8349e-12	1.32207e-15	-0.467873	0.114	0.484	2.68975e-11	2.23795e-12	-0.434232	0.185	0.561	4.55311e-08	4.03419e-16	-0.369647	0.109	0.508	8.20755e-12	3.35219e-26	-0.577777	0.091	0.516	6.82003e-22	2.56214e-20	-0.705696	0.143	0.64	5.21268e-16	7.22885e-15	-0.427608	0.195	0.576	1.47071e-10	3.1408e-25	-0.629527	0.12	0.584	6.38996e-21	2.23795e-12	2.68175e-25
Impact	3.63118e-22	-0.865155	0.32	0.871	7.38764e-18	2.6859e-27	-0.793379	0.494	0.825	5.46446e-23	3.79512e-21	-0.579785	0.667	0.881	7.72116e-17	1.81306e-29	-0.809016	0.423	0.83	3.68867e-25	2.06345e-31	-0.692994	0.489	0.823	4.19808e-27	9.84221e-23	-0.709146	0.597	0.889	2.0024e-18	6.6874e-31	-0.723331	0.622	0.877	1.36055e-26	1.05176e-35	-0.765892	0.55	0.875	2.13981e-31	3.79512e-21	8.4141e-35
Rps10	1.43259e-14	-0.615716	0.311	0.829	2.91461e-10	1.58455e-21	-0.63073	0.506	0.798	3.22376e-17	1.65457e-29	-0.826008	0.622	0.879	3.36622e-25	5.11223e-26	-0.761957	0.429	0.815	1.04008e-21	3.50985e-33	-0.759486	0.443	0.808	7.14079e-29	1.68135e-21	-0.709785	0.58	0.851	3.42072e-17	3.09211e-36	-0.883741	0.476	0.849	6.2909e-32	1.94505e-22	-0.658747	0.288	0.727	3.95721e-18	1.43259e-14	2.47369e-35
Calm2	2.30171e-12	-0.46674	0.592	0.913	4.68283e-08	3.66051e-25	-0.607158	0.608	0.85	7.4473e-21	9.07053e-23	-0.587322	0.667	0.902	1.8454e-18	3.90392e-25	-0.615343	0.564	0.858	7.94252e-21	2.81659e-27	-0.544772	0.566	0.873	5.73035e-23	1.82335e-23	-0.713805	0.597	0.876	3.7096e-19	3.01449e-28	-0.616205	0.628	0.883	6.13298e-24	7.4254e-19	-0.456298	0.518	0.844	1.5107e-14	2.30171e-12	2.41159e-27
Rpl31	2.37066e-07	-0.280831	0.689	0.926	0.00482312	9.2772e-14	-0.324977	0.765	0.891	1.88745e-09	4.78279e-25	-0.585121	0.837	0.934	9.73059e-21	9.07776e-26	-0.619444	0.686	0.892	1.84687e-21	7.48207e-23	-0.473585	0.694	0.89	1.52223e-18	2.51296e-26	-0.719421	0.723	0.916	5.11262e-22	2.83314e-30	-0.656256	0.707	0.911	5.76401e-26	4.06122e-24	-0.580524	0.56	0.855	8.26256e-20	2.37066e-07	2.26651e-29
Rps13	9.37658e-23	-0.896328	0.34	0.869	1.90767e-18	4.98344e-26	-0.695924	0.584	0.836	1.01388e-21	1.04975e-30	-0.838333	0.607	0.891	2.13571e-26	2.24641e-27	-0.746951	0.538	0.828	4.57032e-23	3.12033e-23	-0.521954	0.548	0.838	6.34832e-19	6.10256e-23	-0.720973	0.639	0.872	1.24157e-18	3.15501e-36	-0.856883	0.537	0.87	6.41888e-32	1.4391e-25	-0.681917	0.403	0.804	2.92784e-21	9.37658e-23	2.52401e-35
Map4	7.62915e-11	-0.394777	0.155	0.579	1.55215e-06	1.13889e-19	-0.579492	0.12	0.554	2.31708e-15	3.88082e-12	-0.454082	0.274	0.643	7.89553e-08	3.96784e-23	-0.693885	0.115	0.593	8.07257e-19	3.51365e-27	-0.627582	0.119	0.564	7.14851e-23	4.29861e-20	-0.724597	0.126	0.619	8.74551e-16	1.0191e-22	-0.628423	0.177	0.639	2.07335e-18	2.54394e-21	-0.512764	0.136	0.571	5.17565e-17	7.62915e-11	2.81092e-26
Nsf	4.89112e-17	-0.712141	0.204	0.758	9.95099e-13	5.41281e-13	-0.491276	0.307	0.667	1.10124e-08	5.1547e-17	-0.573537	0.393	0.768	1.04872e-12	6.14342e-22	-0.733932	0.237	0.702	1.24988e-17	1.25615e-27	-0.671804	0.219	0.695	2.55563e-23	4.41783e-18	-0.725267	0.336	0.749	8.98808e-14	1.07992e-26	-0.788465	0.317	0.752	2.1971e-22	1.54813e-20	-0.60454	0.267	0.702	3.14966e-16	5.41281e-13	1.00492e-26
Rpl13a	3.8099e-24	-0.963375	0.184	0.798	7.75124e-20	2.52504e-20	-0.700774	0.325	0.714	5.1372e-16	2.49318e-21	-0.720101	0.444	0.795	5.07237e-17	4.94067e-27	-0.889133	0.25	0.737	1.00518e-22	5.46131e-33	-0.821404	0.269	0.738	1.1111e-28	2.7803e-21	-0.732967	0.361	0.792	5.65652e-17	8.61997e-29	-0.816963	0.274	0.753	1.75373e-24	7.0942e-28	-0.776045	0.199	0.691	1.44331e-23	2.52504e-20	4.36905e-32
Atp6v1b2	8.5039e-14	-0.530708	0.223	0.719	1.73012e-09	1.25347e-15	-0.510395	0.223	0.633	2.55019e-11	1.59733e-16	-0.572442	0.289	0.743	3.24976e-12	1.84432e-29	-0.865136	0.109	0.658	3.75226e-25	1.39928e-25	-0.621546	0.205	0.653	2.84683e-21	2.68748e-19	-0.735175	0.252	0.719	5.46767e-15	5.11124e-21	-0.620407	0.28	0.72	1.03988e-16	1.45533e-17	-0.463402	0.298	0.719	2.96087e-13	8.5039e-14	1.47545e-28
Nap1l5	3.51079e-32	-0.979788	0.777	0.947	7.1427e-28	8.32851e-23	-0.646314	0.886	0.919	1.69443e-18	2.44099e-25	-0.689882	0.933	0.948	4.9662e-21	4.11468e-38	-0.848742	0.814	0.928	8.37131e-34	2.52549e-31	-0.623257	0.817	0.927	5.13811e-27	1.33059e-28	-0.735326	0.882	0.938	2.70708e-24	4.9452e-42	-0.878872	0.866	0.946	1.0061e-37	1.41974e-41	-0.814079	0.775	0.944	2.88846e-37	8.32851e-23	3.95616e-41
Fau	1.4974e-19	-0.634305	0.66	0.93	3.04647e-15	3.15654e-17	-0.453818	0.825	0.916	6.42198e-13	7.1045e-24	-0.544224	0.904	0.949	1.44541e-19	2.15398e-37	-0.843017	0.686	0.907	4.38227e-33	5.0299e-19	-0.417353	0.804	0.922	1.02333e-14	1.02066e-27	-0.735547	0.807	0.928	2.07654e-23	2.93241e-40	-0.831446	0.738	0.932	5.96598e-36	1.40172e-20	-0.491688	0.681	0.876	2.8518e-16	3.15654e-17	2.34593e-39
Mtpn	2.03382e-22	-0.885322	0.097	0.689	4.13781e-18	1.81853e-19	-0.565115	0.139	0.57	3.69979e-15	6.17888e-18	-0.608057	0.193	0.648	1.25709e-13	1.03364e-28	-0.871291	0.09	0.612	2.10293e-24	1.70675e-32	-0.741939	0.1	0.578	3.47239e-28	1.17891e-20	-0.737919	0.101	0.597	2.3985e-16	6.83895e-23	-0.616482	0.177	0.642	1.39138e-18	1.43554e-26	-0.652919	0.099	0.569	2.9206e-22	6.17888e-18	1.3654e-31
Npm1	6.31254e-21	-0.879636	0.165	0.75	1.28429e-16	2.56263e-19	-0.643991	0.331	0.722	5.21367e-15	2.26818e-22	-0.763053	0.444	0.82	4.61461e-18	5.49686e-28	-0.869242	0.231	0.753	1.11834e-23	2.86311e-23	-0.58338	0.292	0.725	5.82499e-19	2.83504e-20	-0.743545	0.42	0.825	5.76788e-16	3.22303e-25	-0.770575	0.366	0.766	6.55726e-21	4.54063e-21	-0.574768	0.215	0.655	9.23791e-17	2.56263e-19	4.39749e-27
Ywhag	7.2295e-23	-0.86599	0.417	0.872	1.47084e-18	5.58537e-25	-0.771696	0.392	0.755	1.13634e-20	1.38581e-17	-0.560183	0.593	0.847	2.81944e-13	7.00921e-30	-0.851941	0.333	0.802	1.42602e-25	2.82109e-34	-0.754178	0.329	0.777	5.7395e-30	1.1197e-20	-0.744297	0.462	0.81	2.27804e-16	1.10855e-32	-0.769159	0.512	0.838	2.25535e-28	2.07154e-28	-0.691795	0.471	0.824	4.21455e-24	1.38581e-17	2.25687e-33
Rpl35	1.4132e-24	-0.978259	0.311	0.852	2.87516e-20	7.58634e-20	-0.607467	0.404	0.77	1.54344e-15	3.87033e-31	-0.863695	0.474	0.849	7.87419e-27	4.87929e-25	-0.7624	0.378	0.795	9.92691e-21	6.66592e-24	-0.566636	0.42	0.783	1.35618e-19	8.17849e-23	-0.745703	0.538	0.846	1.66391e-18	8.90483e-36	-0.935547	0.366	0.808	1.81169e-31	6.93343e-30	-0.790801	0.487	0.807	1.41061e-25	7.58634e-20	7.12386e-35
Zic1	9.61118e-10	-0.784886	0.039	0.341	1.9554e-05	4.22125e-10	-0.60376	0.06	0.293	8.58813e-06	1.06198e-08	-0.618239	0.052	0.281	0.000216059	6.99874e-11	-0.682403	0.045	0.293	1.42389e-06	1.14533e-11	-0.526515	0.068	0.288	2.33017e-07	1.67772e-10	-0.757671	0.092	0.389	3.41332e-06	6.49575e-12	-0.657923	0.073	0.339	1.32156e-07	4.45297e-17	-0.689324	0.068	0.39	9.05956e-13	1.06198e-08	3.56238e-16
Pnmal2	1.18553e-22	-0.785317	0.282	0.848	2.41196e-18	6.13615e-32	-0.994988	0.259	0.723	1.2484e-27	1.07587e-19	-0.635844	0.511	0.818	2.18887e-15	1.42772e-33	-1.02054	0.244	0.767	2.90469e-29	7.20078e-22	-0.572767	0.356	0.74	1.465e-17	4.04535e-21	-0.760452	0.378	0.797	8.23027e-17	2.65614e-30	-0.814379	0.372	0.8	5.40392e-26	2.29092e-26	-0.72439	0.309	0.751	4.66088e-22	1.07587e-19	1.14217e-32
Rpl24	3.33515e-25	-0.856912	0.534	0.919	6.78537e-21	9.94763e-21	-0.527763	0.747	0.911	2.02384e-16	1.8522e-33	-0.736268	0.874	0.95	3.7683e-29	1.65283e-26	-0.677995	0.667	0.896	3.36268e-22	8.95116e-29	-0.54989	0.694	0.905	1.82111e-24	1.96248e-28	-0.762695	0.773	0.919	3.99266e-24	1.33527e-36	-0.772724	0.72	0.92	2.71662e-32	2.46542e-36	-0.849275	0.503	0.856	5.0159e-32	9.94763e-21	1.06822e-35
Rps4x	5.84833e-20	-0.792587	0.524	0.888	1.18984e-15	3.49423e-33	-0.88553	0.639	0.872	7.10902e-29	5.34487e-36	-0.922677	0.748	0.915	1.08741e-31	8.62219e-35	-0.98005	0.526	0.848	1.75418e-30	1.4092e-35	-0.756246	0.607	0.858	2.86702e-31	1.43541e-26	-0.764039	0.773	0.915	2.92035e-22	9.27405e-46	-1.08965	0.585	0.889	1.8868e-41	2.22868e-27	-0.770473	0.44	0.805	4.53425e-23	5.84833e-20	7.41924e-45
Gap43	4.82384e-24	-1.01466	0.291	0.836	9.81411e-20	2.44412e-29	-0.960587	0.367	0.747	4.97256e-25	6.60967e-27	-0.830509	0.556	0.841	1.34474e-22	4.40971e-35	-1.07201	0.321	0.788	8.97155e-31	1.22527e-47	-1.1216	0.279	0.775	2.49282e-43	2.24064e-22	-0.764903	0.571	0.842	4.55859e-18	5.00144e-41	-1.09086	0.445	0.82	1.01754e-36	3.03618e-26	-0.750188	0.33	0.751	6.17712e-22	2.24064e-22	9.80219e-47
Rplp2	3.09665e-19	-0.73739	0.476	0.9	6.30013e-15	3.85008e-18	-0.507922	0.699	0.856	7.83299e-14	4.12662e-23	-0.633764	0.837	0.912	8.39561e-19	5.8106e-23	-0.639517	0.615	0.845	1.18217e-18	4.67597e-26	-0.552847	0.648	0.869	9.51327e-22	1.17126e-24	-0.765654	0.664	0.891	2.38292e-20	1.51346e-36	-0.813423	0.585	0.886	3.07912e-32	7.68007e-22	-0.609159	0.466	0.813	1.56251e-17	3.85008e-18	1.21076e-35
Rpl23a	9.79574e-18	-0.62348	0.65	0.928	1.99294e-13	2.05601e-16	-0.420661	0.837	0.928	4.18296e-12	3.52888e-33	-0.754761	0.852	0.957	7.17951e-29	7.56732e-31	-0.703507	0.776	0.913	1.53957e-26	3.75877e-25	-0.495002	0.79	0.915	7.64722e-21	3.47474e-31	-0.766864	0.765	0.947	7.06937e-27	9.70091e-41	-0.855324	0.793	0.93	1.97365e-36	3.27204e-31	-0.731591	0.576	0.866	6.65696e-27	2.05601e-16	7.76073e-40
Tspyl4	3.37259e-22	-0.920098	0.136	0.737	6.86154e-18	1.4267e-24	-0.756564	0.193	0.66	2.90263e-20	4.40296e-20	-0.670838	0.304	0.761	8.95782e-16	2.52023e-27	-0.811358	0.154	0.695	5.1274e-23	6.39209e-26	-0.64936	0.215	0.673	1.30047e-21	7.82794e-21	-0.771765	0.294	0.743	1.59259e-16	8.09245e-20	-0.614464	0.341	0.751	1.64641e-15	4.8849e-27	-0.728947	0.188	0.668	9.93833e-23	8.09245e-20	2.01618e-26
Ywhab	1.29982e-31	-1.2347	0.262	0.857	2.64449e-27	2.57044e-35	-1.13014	0.223	0.722	5.22956e-31	1.74501e-25	-0.805703	0.496	0.816	3.55022e-21	1.38911e-36	-1.13354	0.205	0.772	2.82614e-32	6.71807e-48	-1.09728	0.247	0.759	1.36679e-43	4.25494e-21	-0.774328	0.412	0.791	8.65667e-17	4.13988e-35	-0.923035	0.402	0.801	8.42259e-31	1.5039e-33	-0.888148	0.304	0.754	3.05968e-29	4.25494e-21	5.37446e-47
Rpl12	8.84604e-13	-0.578671	0.291	0.794	1.79973e-08	3.97854e-16	-0.554402	0.458	0.762	8.09435e-12	2.40981e-25	-0.764534	0.496	0.838	4.90277e-21	1.71076e-27	-0.870937	0.346	0.782	3.48054e-23	4.649e-25	-0.633791	0.379	0.762	9.45839e-21	3.29454e-21	-0.774824	0.513	0.82	6.70273e-17	4.02173e-25	-0.714601	0.494	0.808	8.18221e-21	1.24088e-22	-0.579346	0.236	0.694	2.52457e-18	8.84604e-13	1.36861e-26
Atp5e	2.68162e-13	-0.543985	0.194	0.686	5.45575e-09	1.20272e-13	-0.393924	0.247	0.655	2.44694e-09	1.60309e-11	-0.332291	0.311	0.71	3.26149e-07	2.77633e-20	-0.534857	0.122	0.591	5.64845e-16	9.43442e-15	-0.31719	0.233	0.614	1.91943e-10	3.31585e-21	-0.775785	0.193	0.688	6.74609e-17	4.35994e-14	-0.409012	0.244	0.642	8.87029e-10	7.3864e-15	-0.301464	0.241	0.657	1.50276e-10	1.60309e-11	2.65268e-20
Ctxn1	2.58023e-16	-0.675834	0.117	0.624	5.24947e-12	3.12e-22	-0.73147	0.114	0.559	6.34764e-18	1.84033e-17	-0.662118	0.23	0.652	3.74416e-13	4.39065e-26	-0.869046	0.077	0.567	8.93279e-22	8.99966e-29	-0.74376	0.105	0.546	1.83098e-24	2.54534e-21	-0.778749	0.151	0.646	5.1785e-17	1.57007e-18	-0.618811	0.189	0.601	3.19431e-14	3.25725e-17	-0.43848	0.178	0.562	6.62687e-13	2.58023e-16	7.19973e-28
Rps15	8.58926e-14	-0.522991	0.67	0.914	1.74748e-09	3.90787e-19	-0.449455	0.789	0.912	7.95056e-15	1.29851e-31	-0.649798	0.904	0.955	2.64181e-27	1.73429e-29	-0.69546	0.744	0.905	3.52841e-25	2.25764e-22	-0.447452	0.79	0.923	4.59317e-18	1.28179e-30	-0.780832	0.798	0.935	2.6078e-26	1.36167e-44	-0.867256	0.732	0.935	2.77031e-40	1.42655e-20	-0.506652	0.681	0.885	2.90231e-16	8.58926e-14	1.08933e-43
Slc17a6	8.50948e-06	-0.536554	0.029	0.218	0.173125	3.23343e-14	-0.812746	0.03	0.316	6.57841e-10	8.57678e-10	-0.782304	0.044	0.289	1.74495e-05	2.22025e-12	-0.849621	0.026	0.289	4.5171e-08	3.94228e-17	-0.882497	0.023	0.291	8.02058e-13	2.54977e-10	-0.790047	0.025	0.301	5.1875e-06	4.13502e-15	-0.859653	0.049	0.358	8.41271e-11	9.02354e-15	-0.654665	0.073	0.368	1.83584e-10	8.50948e-06	3.15383e-16
Rpl41	3.19426e-28	-0.671266	0.971	0.992	6.49872e-24	2.51356e-25	-0.578285	0.976	0.98	5.11385e-21	2.98229e-38	-0.75495	0.985	0.988	6.06747e-34	5.09911e-35	-0.684083	0.923	0.973	1.03741e-30	1.08811e-36	-0.535662	0.954	0.985	2.21377e-32	2.97938e-35	-0.79402	0.966	0.982	6.06156e-31	7.50539e-50	-0.849852	0.97	0.983	1.52697e-45	1.03475e-32	-0.634476	0.953	0.982	2.1052e-28	2.51356e-25	6.00431e-49
Eif1	5.69685e-16	-0.606032	0.553	0.917	1.15902e-11	1.88559e-26	-0.658619	0.663	0.878	3.83623e-22	4.77825e-31	-0.74093	0.704	0.913	9.72136e-27	6.32221e-27	-0.699055	0.538	0.853	1.28625e-22	9.63117e-38	-0.724749	0.53	0.862	1.95946e-33	3.06357e-32	-0.79438	0.723	0.916	6.23283e-28	5.1352e-39	-0.832022	0.561	0.891	1.04476e-34	5.00635e-19	-0.467053	0.565	0.862	1.01854e-14	5.69685e-16	4.10816e-38
Rpl13	8.26344e-25	-0.729385	0.728	0.949	1.6812e-20	7.75633e-29	-0.666872	0.886	0.948	1.57803e-24	2.41238e-38	-0.789938	0.941	0.968	4.90798e-34	2.11823e-41	-0.880039	0.859	0.937	4.30954e-37	1.07882e-37	-0.641052	0.9	0.933	2.19486e-33	3.11352e-36	-0.798477	0.933	0.964	6.33446e-32	9.19829e-45	-0.871155	0.872	0.958	1.87139e-40	4.39667e-36	-0.736022	0.759	0.922	8.94502e-32	8.26344e-25	7.35863e-44
Rpl5	2.58918e-19	-0.779912	0.136	0.699	5.26769e-15	1.2275e-13	-0.490607	0.361	0.708	2.49735e-09	1.73576e-15	-0.546064	0.407	0.787	3.53141e-11	6.56942e-25	-0.770318	0.231	0.737	1.33655e-20	7.23526e-25	-0.59595	0.251	0.69	1.47201e-20	4.36294e-23	-0.799274	0.303	0.782	8.87639e-19	6.68337e-27	-0.753927	0.317	0.767	1.35973e-22	3.73007e-22	-0.558676	0.168	0.62	7.58884e-18	1.2275e-13	5.34669e-26
Rpl30	1.72132e-12	-0.551316	0.408	0.844	3.50202e-08	1.38785e-24	-0.704925	0.524	0.817	2.82358e-20	6.08283e-32	-0.833411	0.622	0.88	1.23755e-27	5.80409e-36	-0.992461	0.436	0.827	1.18084e-31	3.46159e-33	-0.735076	0.461	0.823	7.0426e-29	3.69126e-24	-0.810502	0.555	0.854	7.50987e-20	7.49292e-34	-0.857232	0.555	0.845	1.52444e-29	1.26916e-17	-0.49698	0.356	0.754	2.58211e-13	1.72132e-12	4.64327e-35
Selenow	1.64089e-25	-0.876947	0.553	0.906	3.33839e-21	1.12916e-25	-0.749098	0.5	0.813	2.29728e-21	1.16179e-25	-0.698278	0.681	0.892	2.36367e-21	3.97904e-27	-0.821321	0.385	0.811	8.09536e-23	3.39198e-27	-0.621056	0.502	0.819	6.90098e-23	3.18544e-26	-0.810931	0.664	0.857	6.48077e-22	4.05883e-36	-0.846945	0.61	0.863	8.2577e-32	3.16084e-32	-0.613164	0.749	0.914	6.43073e-28	1.64089e-25	3.24707e-35
Vamp2	1.07683e-18	-0.817714	0.262	0.799	2.1908e-14	7.36148e-29	-0.865346	0.205	0.699	1.49769e-24	3.62548e-22	-0.729192	0.43	0.8	7.37604e-18	3.93849e-26	-0.805286	0.212	0.724	8.01286e-22	1.6193e-32	-0.797066	0.242	0.722	3.29447e-28	4.95888e-22	-0.817166	0.37	0.791	1.00888e-17	1.80129e-26	-0.757874	0.354	0.773	3.66473e-22	7.03854e-25	-0.681221	0.377	0.784	1.43199e-20	1.07683e-18	1.29544e-31
Morf4l1	2.60962e-19	-0.76098	0.388	0.871	5.30927e-15	2.54522e-17	-0.5405	0.464	0.792	5.17824e-13	6.16112e-20	-0.578913	0.556	0.858	1.25348e-15	4.18706e-23	-0.682243	0.385	0.808	8.51858e-19	3.34809e-25	-0.558317	0.447	0.813	6.81169e-21	6.81221e-25	-0.820288	0.445	0.845	1.38594e-20	1.42322e-28	-0.682337	0.494	0.853	2.89553e-24	8.23492e-20	-0.552569	0.435	0.814	1.67539e-15	2.54522e-17	1.13857e-27
Tubb4a	4.06212e-15	-0.669172	0.146	0.641	8.26438e-11	8.47215e-21	-0.659463	0.09	0.522	1.72366e-16	7.90718e-20	-0.678771	0.163	0.623	1.60872e-15	2.76176e-21	-0.598394	0.096	0.549	5.6188e-17	2.25309e-31	-0.671839	0.073	0.541	4.58391e-27	2.39947e-22	-0.825958	0.126	0.632	4.88173e-18	1.09546e-19	-0.652518	0.183	0.604	2.22872e-15	2.0804e-18	-0.460798	0.199	0.626	4.23257e-14	4.06212e-15	1.80247e-30
Rpl4	2.39306e-23	-0.95264	0.272	0.857	4.86869e-19	1.652e-23	-0.696	0.554	0.825	3.36099e-19	9.62102e-30	-0.787939	0.622	0.89	1.9574e-25	4.75873e-26	-0.791706	0.404	0.809	9.68163e-22	1.00871e-34	-0.777545	0.443	0.815	2.05222e-30	2.40025e-27	-0.834059	0.58	0.881	4.8833e-23	7.06141e-30	-0.746556	0.591	0.852	1.43664e-25	1.11833e-19	-0.568192	0.403	0.784	2.27524e-15	1.11833e-19	8.06966e-34
Ptma	2.72525e-24	-0.977829	0.194	0.828	5.54453e-20	4.20092e-25	-0.821487	0.313	0.746	8.54677e-21	1.9127e-23	-0.692917	0.333	0.804	3.89138e-19	1.82286e-15	-0.552309	0.346	0.747	3.7086e-11	1.07123e-23	-0.568985	0.292	0.729	2.17941e-19	9.66649e-23	-0.836271	0.328	0.796	1.96665e-18	2.10277e-24	-0.745506	0.348	0.787	4.27809e-20	2.44432e-18	-0.471289	0.304	0.744	4.97297e-14	1.82286e-15	3.36074e-24
Chchd2	4.76813e-19	-0.729185	0.262	0.833	9.70075e-15	4.17163e-20	-0.615243	0.404	0.773	8.48719e-16	9.59173e-18	-0.587265	0.511	0.845	1.95144e-13	4.66268e-25	-0.760037	0.333	0.786	9.48623e-21	1.27606e-23	-0.548607	0.361	0.774	2.59615e-19	6.30851e-27	-0.841789	0.454	0.847	1.28347e-22	1.30367e-29	-0.767781	0.384	0.815	2.65231e-25	1.46849e-29	-0.704121	0.236	0.742	2.98765e-25	9.59173e-18	1.04293e-28
Rpl23	1.28477e-16	-0.637109	0.573	0.916	2.61387e-12	2.09822e-27	-0.684593	0.717	0.896	4.26882e-23	3.54754e-38	-0.856316	0.793	0.95	7.21748e-34	3.91735e-32	-0.778076	0.577	0.892	7.96986e-28	7.8085e-32	-0.620359	0.644	0.896	1.58864e-27	1.34646e-30	-0.845401	0.739	0.917	2.73938e-26	1.2249e-44	-0.889603	0.75	0.92	2.49206e-40	1.04682e-25	-0.616557	0.581	0.859	2.12975e-21	1.28477e-16	9.79919e-44
Zwint	1.0175e-19	-0.77994	0.417	0.866	2.0701e-15	1.03399e-25	-0.769074	0.446	0.784	2.10364e-21	3.60011e-22	-0.67232	0.57	0.865	7.32443e-18	3.26677e-33	-0.949017	0.372	0.801	6.64624e-29	5.10879e-41	-0.895064	0.352	0.796	1.03938e-36	1.79107e-25	-0.84802	0.462	0.837	3.64393e-21	4.45048e-35	-0.857511	0.506	0.847	9.0545e-31	3.07453e-33	-0.752521	0.414	0.831	6.25513e-29	1.0175e-19	4.08703e-40
Rps17	3.73656e-26	-0.995305	0.272	0.865	7.60203e-22	2.98717e-13	-0.433534	0.651	0.823	6.0774e-09	1.15188e-27	-0.754113	0.644	0.884	2.3435e-23	5.18433e-26	-0.75982	0.436	0.84	1.05475e-21	9.60892e-23	-0.497708	0.571	0.831	1.95493e-18	2.66745e-28	-0.851405	0.529	0.867	5.42693e-24	7.44379e-34	-0.832241	0.506	0.858	1.51444e-29	1.2297e-18	-0.462294	0.398	0.783	2.50183e-14	2.98717e-13	5.95504e-33
Tmsb10	4.98787e-20	-0.662384	0.806	0.941	1.01478e-15	2.02465e-30	-0.850749	0.596	0.852	4.11915e-26	3.02163e-27	-0.713222	0.785	0.914	6.1475e-23	2.16066e-19	-0.5776	0.571	0.847	4.39587e-15	4.02787e-21	-0.498462	0.676	0.885	8.1947e-17	2.39133e-30	-0.852471	0.739	0.9	4.86516e-26	1.47666e-33	-0.758649	0.701	0.898	3.00427e-29	2.54364e-28	-0.616494	0.832	0.942	5.17504e-24	2.16066e-19	1.18133e-32
Rpl6	4.5796e-21	-0.762485	0.641	0.917	9.31719e-17	7.76842e-27	-0.684589	0.741	0.907	1.58049e-22	4.24339e-33	-0.78958	0.859	0.938	8.63317e-29	1.07509e-33	-0.785102	0.718	0.907	2.18728e-29	4.79745e-34	-0.655996	0.758	0.914	9.76042e-30	2.03599e-32	-0.85715	0.79	0.942	4.14222e-28	2.67927e-37	-0.819126	0.744	0.914	5.45097e-33	1.69728e-28	-0.719115	0.576	0.872	3.45312e-24	4.5796e-21	2.14341e-36
Ahi1	3.42943e-29	-0.957097	0.67	0.914	6.97718e-25	3.03603e-30	-0.842856	0.663	0.875	6.1768e-26	3.30861e-29	-0.749618	0.8	0.927	6.73138e-25	3.4062e-36	-0.842385	0.66	0.926	6.92992e-32	9.42409e-35	-0.715552	0.708	0.883	1.91733e-30	3.58461e-28	-0.866173	0.655	0.894	7.29289e-24	1.90589e-37	-0.772148	0.811	0.935	3.87753e-33	3.4755e-23	-0.550018	0.743	0.912	7.07091e-19	3.4755e-23	1.52471e-36
Rpl18a	9.87101e-17	-0.673506	0.524	0.918	2.00826e-12	7.90998e-21	-0.554933	0.693	0.89	1.60929e-16	4.12277e-29	-0.682833	0.807	0.933	8.38777e-25	7.50227e-35	-0.84845	0.571	0.882	1.52634e-30	4.39254e-37	-0.699319	0.621	0.902	8.93663e-33	1.83163e-32	-0.867965	0.714	0.913	3.72645e-28	2.19523e-37	-0.818586	0.659	0.904	4.46619e-33	2.07844e-31	-0.732126	0.534	0.856	4.22859e-27	9.87101e-17	1.75618e-36
Chd3os	9.5683e-27	-1.00359	0.272	0.861	1.94667e-22	8.17825e-25	-0.750625	0.416	0.795	1.66386e-20	6.70183e-26	-0.807228	0.519	0.862	1.36349e-21	2.07003e-29	-0.881338	0.372	0.823	4.21147e-25	4.03007e-25	-0.592399	0.525	0.828	8.19917e-21	7.37529e-25	-0.868119	0.454	0.835	1.5005e-20	4.49018e-31	-0.820375	0.524	0.846	9.13527e-27	1.12038e-21	-0.586062	0.398	0.784	2.27941e-17	1.12038e-21	3.59214e-30
Cox7a2l	4.61034e-26	-1.03883	0.136	0.784	9.37974e-22	8.05333e-26	-0.797515	0.289	0.74	1.63845e-21	2.01961e-26	-0.800599	0.459	0.836	4.10889e-22	1.10047e-31	-0.983544	0.256	0.761	2.23891e-27	1.71705e-35	-0.808169	0.288	0.759	3.49334e-31	2.07401e-26	-0.870203	0.395	0.827	4.21957e-22	2.20029e-37	-0.984294	0.36	0.807	4.4765e-33	1.01028e-33	-0.826696	0.204	0.727	2.05542e-29	8.05333e-26	1.76023e-36
Rps11	2.71454e-24	-0.842719	0.563	0.908	5.52274e-20	1.0672e-25	-0.725017	0.687	0.883	2.17122e-21	4.26052e-38	-0.942881	0.741	0.929	8.66803e-34	1.13599e-40	-1.06871	0.583	0.868	2.31118e-36	4.47825e-34	-0.676496	0.689	0.89	9.111e-30	1.64582e-31	-0.886873	0.739	0.919	3.34842e-27	1.64886e-49	-1.09425	0.695	0.907	3.3546e-45	5.95591e-38	-0.888352	0.461	0.849	1.21173e-33	2.71454e-24	1.31909e-48
Rps29	1.90547e-29	-0.769065	0.883	0.976	3.87668e-25	1.47805e-19	-0.485578	0.898	0.956	3.0071e-15	3.62769e-32	-0.710418	0.956	0.974	7.38055e-28	2.43679e-37	-0.802659	0.872	0.952	4.95764e-33	3.28896e-32	-0.539171	0.909	0.962	6.6914e-28	1.59892e-34	-0.889244	0.924	0.967	3.253e-30	9.25127e-47	-0.883228	0.896	0.963	1.88217e-42	2.03613e-38	-0.81161	0.817	0.937	4.14252e-34	1.47805e-19	7.40101e-46
Cox7c	1.96555e-20	-0.744406	0.485	0.887	3.99892e-16	8.44043e-27	-0.731603	0.452	0.838	1.7172e-22	1.12708e-30	-0.822092	0.637	0.886	2.29304e-26	4.24851e-32	-0.87534	0.423	0.827	8.64358e-28	1.73083e-33	-0.682228	0.493	0.856	3.52138e-29	1.75435e-29	-0.88973	0.605	0.862	3.56922e-25	3.8611e-40	-0.944709	0.506	0.861	7.8554e-36	3.10758e-31	-0.749868	0.445	0.835	6.32237e-27	1.96555e-20	3.08888e-39
Ywhah	3.38115e-28	-1.07529	0.282	0.849	6.87894e-24	1.63926e-28	-0.879146	0.307	0.737	3.33508e-24	9.31055e-26	-0.78892	0.452	0.829	1.89423e-21	3.50337e-32	-0.961654	0.256	0.767	7.12761e-28	2.88172e-37	-0.887608	0.279	0.749	5.86287e-33	5.01795e-26	-0.901922	0.429	0.816	1.0209e-21	2.44406e-27	-0.763418	0.457	0.805	4.97244e-23	6.83656e-30	-0.727535	0.33	0.776	1.3909e-25	9.31055e-26	2.30538e-36
Rpl11	4.83023e-28	-0.997599	0.476	0.914	9.82711e-24	3.27108e-32	-0.872633	0.657	0.878	6.65502e-28	2.65384e-31	-0.800619	0.822	0.927	5.39923e-27	1.00847e-37	-0.990857	0.583	0.878	2.05173e-33	7.87755e-43	-0.80188	0.671	0.895	1.60269e-38	1.47122e-32	-0.901965	0.807	0.918	2.9932e-28	8.71886e-45	-0.967576	0.713	0.917	1.77385e-40	2.54295e-28	-0.731225	0.623	0.852	5.17364e-24	4.83023e-28	6.97509e-44
Rps5	3.87118e-20	-0.771671	0.505	0.904	7.87591e-16	3.25952e-25	-0.684016	0.735	0.879	6.6315e-21	1.16988e-31	-0.779302	0.785	0.934	2.38013e-27	3.76027e-31	-0.824896	0.654	0.876	7.65027e-27	1.64336e-32	-0.658418	0.731	0.882	3.34341e-28	1.82635e-32	-0.903859	0.765	0.918	3.7157e-28	1.10582e-38	-0.870239	0.713	0.909	2.2498e-34	3.61087e-29	-0.776376	0.471	0.837	7.34631e-25	3.87118e-20	8.84659e-38
Rps20	7.51394e-19	-0.824452	0.33	0.824	1.52871e-14	5.47161e-21	-0.664023	0.5	0.802	1.1132e-16	4.90428e-33	-0.930622	0.556	0.867	9.97775e-29	1.08054e-33	-0.982867	0.397	0.811	2.19837e-29	2.40763e-28	-0.677029	0.438	0.806	4.89832e-24	1.57517e-27	-0.911087	0.538	0.842	3.20468e-23	3.54319e-41	-1.03403	0.421	0.845	7.20862e-37	1.09969e-28	-0.764342	0.267	0.749	2.23732e-24	7.51394e-19	2.83455e-40
Rpl36a	1.05807e-22	-0.895048	0.32	0.861	2.15264e-18	1.15014e-18	-0.563679	0.506	0.795	2.33996e-14	2.38797e-31	-0.846395	0.548	0.866	4.85832e-27	2.19653e-26	-0.795267	0.417	0.812	4.46884e-22	2.29271e-22	-0.557127	0.493	0.809	4.66453e-18	9.63293e-28	-0.913052	0.504	0.852	1.95982e-23	1.46604e-36	-0.938266	0.463	0.835	2.98265e-32	6.04565e-31	-0.77259	0.335	0.798	1.22999e-26	1.15014e-18	1.17283e-35
Ralbp1	1.11353e-15	-0.583985	0.146	0.666	2.26548e-11	3.84006e-22	-0.645675	0.163	0.626	7.8126e-18	8.06859e-15	-0.472027	0.296	0.696	1.64155e-10	1.33788e-18	-0.574901	0.218	0.673	2.72192e-14	1.17388e-27	-0.622402	0.174	0.641	2.38826e-23	7.1201e-27	-0.924705	0.126	0.686	1.44858e-22	2.57938e-28	-0.745686	0.183	0.705	5.24776e-24	2.4667e-32	-0.781941	0.068	0.576	5.01849e-28	8.06859e-15	1.97336e-31
Tmsb4x	3.67758e-19	-0.684915	0.718	0.954	7.48204e-15	9.5375e-30	-0.710349	0.789	0.937	1.9404e-25	3.9951e-30	-0.760377	0.874	0.957	8.12802e-26	5.08123e-32	-0.829137	0.692	0.921	1.03378e-27	5.59641e-22	-0.481209	0.826	0.94	1.13859e-17	5.76552e-34	-0.930647	0.756	0.939	1.17299e-29	1.76286e-38	-0.766989	0.841	0.953	3.58654e-34	9.48954e-19	-0.415116	0.838	0.944	1.93065e-14	9.48954e-19	1.41029e-37
Rpl39	3.23034e-15	-0.592241	0.544	0.905	6.57214e-11	1.27953e-13	-0.329621	0.717	0.883	2.6032e-09	6.05914e-29	-0.661262	0.763	0.932	1.23273e-24	1.38751e-20	-0.560894	0.564	0.878	2.82289e-16	9.3465e-11	-0.270549	0.703	0.881	1.90155e-06	9.36268e-31	-0.94839	0.555	0.872	1.90484e-26	9.27318e-31	-0.6924	0.616	0.895	1.88663e-26	6.08598e-22	-0.583886	0.466	0.821	1.23819e-17	9.3465e-11	7.41854e-30
Rpl17	6.42182e-34	-1.03131	0.66	0.937	1.30652e-29	9.26552e-22	-0.551973	0.855	0.945	1.88507e-17	1.58445e-36	-0.815056	0.948	0.963	3.22356e-32	8.46809e-42	-0.936064	0.763	0.932	1.72283e-37	8.99319e-38	-0.67216	0.813	0.937	1.82966e-33	1.50761e-36	-0.964842	0.908	0.95	3.06723e-32	3.23553e-46	-0.934164	0.866	0.947	6.58269e-42	2.62564e-41	-0.959496	0.613	0.879	5.34187e-37	9.26552e-22	2.58843e-45
Rpl3	1.66836e-35	-1.21344	0.563	0.924	3.39428e-31	1.14831e-37	-1.04045	0.723	0.911	2.33624e-33	1.66744e-42	-1.10139	0.793	0.941	3.3924e-38	9.07017e-47	-1.34582	0.596	0.884	1.84533e-42	3.74274e-50	-1.04471	0.689	0.9	7.61461e-46	5.25639e-38	-0.975895	0.891	0.959	1.06941e-33	1.28896e-51	-1.22503	0.707	0.921	2.6224e-47	3.74423e-43	-1.04139	0.597	0.88	7.61763e-39	1.66836e-35	1.03117e-50
Rps24	4.66125e-30	-1.06062	0.476	0.908	9.48331e-26	3.01544e-24	-0.720379	0.777	0.881	6.13491e-20	6.7131e-40	-1.06756	0.763	0.921	1.36578e-35	4.06211e-39	-1.06195	0.654	0.868	8.26436e-35	1.63587e-47	-0.937507	0.635	0.886	3.32817e-43	5.186e-33	-0.982755	0.739	0.915	1.05509e-28	6.96038e-46	-1.08927	0.72	0.901	1.41609e-41	2.36745e-29	-0.757945	0.503	0.825	4.81658e-25	3.01544e-24	1.30869e-46
Rpl19	5.83946e-34	-1.15433	0.447	0.906	1.18804e-29	3.88578e-38	-0.938036	0.723	0.907	7.90563e-34	1.05926e-38	-0.916643	0.807	0.938	2.15506e-34	2.37822e-44	-1.12069	0.577	0.889	4.8385e-40	1.34242e-44	-0.853113	0.644	0.897	2.73116e-40	2.71218e-36	-0.986934	0.765	0.924	5.51794e-32	3.69092e-49	-1.0406	0.756	0.913	7.50918e-45	2.24651e-34	-0.793546	0.539	0.871	4.57053e-30	5.83946e-34	2.95274e-48
Rps18	8.94921e-22	-0.783556	0.485	0.894	1.82072e-17	2.25284e-23	-0.695224	0.633	0.834	4.58341e-19	7.54987e-39	-1.06099	0.652	0.89	1.53602e-34	2.01871e-39	-1.09406	0.436	0.834	4.10707e-35	6.11166e-38	-0.800583	0.566	0.844	1.24342e-33	5.82171e-33	-0.990211	0.647	0.887	1.18443e-28	2.23869e-45	-1.09053	0.561	0.876	4.55462e-41	4.64648e-30	-0.800453	0.518	0.822	9.45327e-26	8.94921e-22	1.79095e-44
Rps21	1.98521e-23	-0.821609	0.553	0.911	4.03891e-19	1.51994e-30	-0.828293	0.663	0.869	3.09233e-26	5.9184e-32	-0.845318	0.741	0.917	1.2041e-27	4.4992e-37	-0.961412	0.622	0.863	9.15362e-33	4.05834e-33	-0.675613	0.689	0.875	8.2567e-29	1.37188e-33	-0.995567	0.706	0.9	2.79109e-29	1.32663e-32	-0.746993	0.75	0.892	2.69902e-28	3.91526e-19	-0.467699	0.634	0.858	7.9656e-15	3.91526e-19	3.59936e-36
Rpl36	6.08197e-20	-0.767883	0.485	0.892	1.23738e-15	1.9627e-23	-0.670845	0.542	0.831	3.99311e-19	8.9791e-30	-0.780172	0.674	0.897	1.8268e-25	2.51135e-31	-0.886755	0.442	0.833	5.10934e-27	2.20629e-26	-0.581082	0.557	0.843	4.4887e-22	5.08008e-34	-1.01031	0.538	0.879	1.03354e-29	2.27873e-39	-0.935445	0.537	0.868	4.63608e-35	3.75168e-32	-0.754646	0.555	0.865	7.63279e-28	6.08197e-20	1.82299e-38
Rpl10	6.54637e-30	-1.13932	0.476	0.899	1.33186e-25	1.85832e-31	-0.907602	0.705	0.875	3.78075e-27	1.47221e-43	-1.19756	0.696	0.918	2.99521e-39	2.81571e-39	-1.10726	0.609	0.859	5.72855e-35	1.97362e-38	-0.852186	0.644	0.869	4.01533e-34	4.60738e-34	-1.016	0.782	0.918	9.37371e-30	4.63065e-55	-1.35392	0.579	0.896	9.42106e-51	2.29379e-33	-0.94132	0.492	0.83	4.66671e-29	6.54637e-30	3.70452e-54
Rpl21	1.48159e-31	-1.03497	0.553	0.932	3.01429e-27	8.55913e-30	-0.76211	0.807	0.935	1.74136e-25	3.68666e-35	-0.852296	0.859	0.962	7.5005e-31	2.85775e-40	-0.99579	0.705	0.919	5.8141e-36	2.14633e-43	-0.810892	0.735	0.921	4.3667e-39	4.56622e-38	-1.0165	0.84	0.949	9.28998e-34	2.67657e-51	-1.10271	0.793	0.937	5.44548e-47	6.93915e-34	-0.766556	0.67	0.886	1.41177e-29	8.55913e-30	2.14126e-50
Rps25	2.62987e-21	-0.792602	0.515	0.896	5.35048e-17	1.10868e-17	-0.518478	0.693	0.866	2.25561e-13	7.19886e-39	-1	0.689	0.924	1.46461e-34	1.09932e-32	-0.867487	0.635	0.877	2.23656e-28	1.74456e-27	-0.539547	0.662	0.883	3.5493e-23	1.1555e-31	-1.01743	0.672	0.895	2.35086e-27	8.73448e-43	-1.00214	0.622	0.893	1.77703e-38	5.59379e-33	-0.796675	0.455	0.84	1.13806e-28	1.10868e-17	6.98758e-42
Pfdn5	3.51714e-27	-1.12052	0.214	0.834	7.15563e-23	4.99158e-25	-0.773337	0.392	0.761	1.01554e-20	1.54635e-36	-1.07736	0.43	0.842	3.14605e-32	6.90274e-38	-1.1509	0.308	0.786	1.40436e-33	7.81459e-36	-0.840656	0.361	0.779	1.58988e-31	2.43877e-29	-1.02618	0.454	0.819	4.96167e-25	1.41498e-36	-0.95814	0.415	0.819	2.87879e-32	2.47986e-23	-0.680129	0.387	0.777	5.04527e-19	2.47986e-23	5.52219e-37
Rpl32	5.51894e-26	-0.916687	0.524	0.906	1.12283e-21	1.18095e-27	-0.716418	0.711	0.891	2.40264e-23	3.24796e-37	-0.942094	0.837	0.93	6.60796e-33	1.96787e-37	-1.00011	0.577	0.879	4.00363e-33	1.22947e-39	-0.747082	0.703	0.904	2.50135e-35	1.552e-33	-1.04367	0.664	0.91	3.15754e-29	1.37643e-45	-1.05329	0.677	0.91	2.80036e-41	2.48198e-35	-0.786553	0.592	0.894	5.04959e-31	5.51894e-26	1.10115e-44
Rps12	1.76103e-21	-0.912029	0.282	0.835	3.58283e-17	9.54195e-26	-0.832733	0.536	0.785	1.94131e-21	4.03075e-35	-1.05808	0.511	0.861	8.20057e-31	2.32762e-44	-1.36635	0.301	0.801	4.73554e-40	2.41565e-39	-0.919548	0.384	0.786	4.91464e-35	6.24299e-31	-1.04871	0.454	0.836	1.27014e-26	2.51091e-38	-1.0384	0.463	0.828	5.10845e-34	1.25239e-32	-0.887279	0.251	0.746	2.54799e-28	1.76103e-21	1.86209e-43
Rpl37	1.06539e-33	-0.973676	0.816	0.951	2.16753e-29	1.63721e-26	-0.72139	0.831	0.934	3.33091e-22	3.83299e-40	-1.00074	0.889	0.959	7.79822e-36	1.2845e-40	-0.983889	0.756	0.929	2.61332e-36	3.10884e-34	-0.6284	0.868	0.947	6.32494e-30	7.16117e-36	-1.05376	0.815	0.95	1.45694e-31	6.04712e-48	-1.05249	0.799	0.94	1.23029e-43	2.29874e-43	-0.918532	0.78	0.93	4.67679e-39	1.63721e-26	4.8377e-47
Rps3	3.27387e-27	-1.05464	0.427	0.875	6.6607e-23	7.7074e-28	-0.855493	0.669	0.837	1.56807e-23	3.00822e-37	-0.99411	0.704	0.905	6.12022e-33	3.4661e-42	-1.23383	0.449	0.826	7.05177e-38	4.14535e-44	-0.941586	0.534	0.843	8.43371e-40	8.14382e-35	-1.06104	0.672	0.89	1.65686e-30	3.8256e-47	-1.15535	0.616	0.877	7.78318e-43	5.52892e-33	-0.904077	0.44	0.804	1.12486e-28	3.27387e-27	3.06048e-46
Naca	7.05354e-25	-1.00694	0.175	0.804	1.43504e-20	6.35897e-25	-0.805093	0.331	0.733	1.29373e-20	3.33046e-31	-0.96687	0.378	0.818	6.77582e-27	1.16736e-33	-1.04768	0.212	0.759	2.37499e-29	2.55787e-35	-0.883609	0.269	0.741	5.204e-31	4.92214e-31	-1.07081	0.37	0.816	1.00141e-26	1.67264e-46	-1.24414	0.22	0.792	3.40298e-42	2.38268e-30	-0.818991	0.22	0.722	4.84756e-26	7.05354e-25	1.33811e-45
Uqcrh	3.72811e-20	-0.816712	0.32	0.846	7.58485e-16	9.5321e-23	-0.720705	0.398	0.773	1.93931e-18	1.07314e-26	-0.787411	0.548	0.847	2.1833e-22	1.49051e-37	-1.07674	0.231	0.792	3.03244e-33	1.91633e-30	-0.712347	0.384	0.787	3.89878e-26	8.06689e-31	-1.07328	0.345	0.816	1.64121e-26	1.38308e-36	-0.935111	0.396	0.83	2.81388e-32	3.05543e-29	-0.74983	0.319	0.776	6.21627e-25	3.72811e-20	1.19241e-36
Rpl26	5.72982e-38	-1.29924	0.485	0.92	1.16573e-33	3.17104e-29	-0.805348	0.789	0.912	6.45147e-25	1.8693e-42	-1.08858	0.822	0.944	3.80309e-38	4.0939e-42	-1.10913	0.615	0.886	8.32904e-38	3.41349e-48	-0.904936	0.735	0.91	6.94475e-44	2.03601e-37	-1.07567	0.765	0.926	4.14227e-33	6.49776e-49	-1.11906	0.744	0.92	1.32197e-44	5.25264e-35	-0.852104	0.623	0.856	1.06865e-30	3.17104e-29	5.19821e-48
Gabarapl1	7.53241e-34	-1.31921	0.243	0.848	1.53247e-29	1.43456e-26	-0.822355	0.361	0.763	2.9186e-22	3.35733e-32	-0.901916	0.548	0.849	6.83049e-28	1.66371e-33	-0.967799	0.321	0.794	3.38483e-29	1.90128e-48	-1.04046	0.324	0.798	3.86816e-44	3.6149e-33	-1.08456	0.403	0.833	7.35451e-29	2.12526e-43	-1.0856	0.39	0.819	4.32385e-39	2.43388e-43	-1.09751	0.267	0.771	4.95173e-39	1.43456e-26	1.52102e-47
Rpl14	1.4525e-25	-0.936722	0.524	0.906	2.95511e-21	5.16219e-31	-0.904172	0.669	0.876	1.05025e-26	1.45737e-40	-1.16064	0.711	0.911	2.96502e-36	1.09999e-41	-1.17269	0.596	0.867	2.23793e-37	3.99293e-45	-0.939106	0.694	0.876	8.12362e-41	4.7035e-36	-1.09106	0.723	0.92	9.56926e-32	2.52514e-46	-1.13902	0.707	0.893	5.1374e-42	6.20523e-33	-0.830761	0.586	0.844	1.26245e-28	1.4525e-25	2.02011e-45
Ywhaz	2.62708e-31	-1.26334	0.175	0.826	5.34479e-27	1.13773e-37	-1.27036	0.145	0.676	2.31471e-33	4.13099e-24	-0.753496	0.393	0.781	8.40451e-20	1.86606e-36	-1.11898	0.16	0.732	3.7965e-32	4.53416e-41	-1.004	0.21	0.711	9.22476e-37	1.35573e-29	-1.09303	0.261	0.764	2.75823e-25	1.51035e-38	-1.02555	0.262	0.767	3.0728e-34	5.79047e-38	-0.959099	0.215	0.743	1.17807e-33	4.13099e-24	3.62733e-40
Rps9	5.13501e-30	-1.23544	0.223	0.855	1.04472e-25	2.43041e-24	-0.786354	0.5	0.78	4.94467e-20	9.48912e-39	-1.16429	0.444	0.855	1.93056e-34	1.34818e-30	-0.947725	0.397	0.785	2.74287e-26	4.94542e-36	-0.835996	0.416	0.789	1.00615e-31	3.59112e-33	-1.09377	0.487	0.853	7.30613e-29	8.5375e-38	-1.01594	0.463	0.825	1.73696e-33	6.80778e-37	-0.984974	0.267	0.773	1.38504e-32	2.43041e-24	7.5913e-38
Basp1	1.02445e-32	-1.36964	0.155	0.82	2.08424e-28	7.08914e-30	-1.0482	0.163	0.654	1.44228e-25	2.06011e-25	-0.88159	0.385	0.781	4.1913e-21	7.23214e-40	-1.30704	0.128	0.721	1.47138e-35	1.08796e-39	-1.03162	0.187	0.693	2.21346e-35	5.06424e-29	-1.09605	0.277	0.761	1.03032e-24	8.10477e-34	-0.995707	0.329	0.756	1.64892e-29	5.39444e-41	-1.13134	0.22	0.734	1.0975e-36	2.06011e-25	4.31555e-40
Rps15a	1.05259e-27	-1.03776	0.369	0.879	2.14149e-23	4.44565e-33	-0.95777	0.506	0.825	9.04468e-29	3.33774e-34	-0.999074	0.63	0.881	6.79063e-30	3.36782e-29	-0.839756	0.474	0.827	6.85183e-25	1.46325e-31	-0.700696	0.557	0.838	2.97698e-27	7.69582e-34	-1.11953	0.563	0.855	1.56571e-29	1.42058e-39	-0.965686	0.579	0.861	2.89017e-35	1.0111e-32	-0.830061	0.466	0.822	2.05709e-28	1.05259e-27	1.13646e-38
Rpl22l1	2.36635e-27	-0.958836	0.485	0.908	4.81434e-23	1.61745e-29	-0.739606	0.789	0.914	3.2907e-25	9.9928e-37	-0.893129	0.867	0.94	2.03303e-32	1.09244e-45	-1.14647	0.641	0.895	2.22257e-41	1.07092e-31	-0.591431	0.763	0.92	2.17878e-27	3.34567e-37	-1.122	0.697	0.914	6.80676e-33	8.42802e-51	-1.13379	0.744	0.921	1.71468e-46	7.19669e-30	-0.758852	0.571	0.854	1.46417e-25	2.36635e-27	6.74241e-50
Rps8	8.42094e-34	-1.04244	0.66	0.946	1.71324e-29	4.2833e-27	-0.713959	0.91	0.956	8.71438e-23	1.28984e-41	-0.96113	0.926	0.973	2.62418e-37	1.28339e-45	-1.086	0.788	0.949	2.61106e-41	1.38091e-46	-0.823697	0.808	0.944	2.80945e-42	1.69704e-41	-1.12496	0.824	0.959	3.45262e-37	1.09342e-50	-1.02634	0.86	0.96	2.22457e-46	4.09241e-42	-0.977597	0.665	0.883	8.32602e-38	4.2833e-27	8.74738e-50
Rpl9	1.77601e-34	-1.16736	0.563	0.921	3.61329e-30	1.52703e-40	-1.10889	0.693	0.91	3.10674e-36	5.28578e-44	-1.15749	0.815	0.943	1.07539e-39	1.39874e-47	-1.33095	0.622	0.894	2.84573e-43	8.85965e-56	-1.12269	0.676	0.907	1.8025e-51	1.75877e-38	-1.12583	0.807	0.94	3.57821e-34	2.10432e-51	-1.19611	0.774	0.927	4.28123e-47	2.35506e-43	-1.02337	0.56	0.866	4.79138e-39	1.77601e-34	7.08772e-55
Rps7	2.21742e-24	-0.917208	0.456	0.888	4.51134e-20	1.12347e-27	-0.793697	0.633	0.839	2.2857e-23	8.79274e-39	-1.02939	0.689	0.902	1.78888e-34	2.26376e-35	-0.969773	0.468	0.843	4.60561e-31	7.83471e-31	-0.653319	0.621	0.858	1.59397e-26	1.32189e-37	-1.12797	0.639	0.895	2.68939e-33	5.69418e-41	-0.977535	0.628	0.873	1.15848e-36	3.56493e-28	-0.743768	0.492	0.813	7.25286e-24	2.21742e-24	4.55534e-40
Rpl34	7.13528e-28	-1.014	0.447	0.891	1.45167e-23	7.0306e-31	-0.910641	0.602	0.836	1.43038e-26	1.57665e-36	-1.01992	0.659	0.894	3.2077e-32	1.45718e-41	-1.17529	0.494	0.833	2.96462e-37	4.95083e-36	-0.790854	0.525	0.843	1.00725e-31	5.7923e-35	-1.13527	0.597	0.872	1.17844e-30	1.4421e-49	-1.23078	0.5	0.868	2.93396e-45	2.45508e-35	-0.899631	0.476	0.822	4.99486e-31	7.13528e-28	1.15368e-48
Rps16	3.14613e-30	-1.14656	0.379	0.883	6.40081e-26	4.03806e-39	-1.1397	0.518	0.838	8.21544e-35	1.68395e-41	-1.17884	0.719	0.892	3.426e-37	8.22864e-41	-1.14172	0.526	0.843	1.67412e-36	1.0346e-40	-0.862485	0.571	0.854	2.10488e-36	1.19499e-34	-1.16527	0.63	0.871	2.43121e-30	3.96552e-45	-1.10765	0.634	0.879	8.06785e-41	8.10771e-36	-0.926031	0.492	0.814	1.64951e-31	3.14613e-30	3.17241e-44
Rps23	1.2026e-33	-1.1175	0.621	0.921	2.44669e-29	8.05179e-30	-0.85377	0.813	0.916	1.63814e-25	8.07464e-40	-1.07249	0.852	0.942	1.64279e-35	3.15875e-40	-1.10777	0.737	0.899	6.42649e-36	7.18861e-40	-0.807686	0.785	0.911	1.46252e-35	6.36399e-38	-1.1739	0.773	0.926	1.29475e-33	6.32058e-52	-1.19781	0.774	0.927	1.28592e-47	5.71245e-35	-0.873785	0.618	0.86	1.1622e-30	8.05179e-30	5.05646e-51
Rps27	2.03647e-33	-0.971163	0.786	0.966	4.14321e-29	2.45978e-28	-0.72479	0.892	0.956	5.00442e-24	1.35596e-39	-0.957079	0.919	0.966	2.75871e-35	1.15531e-42	-0.973646	0.833	0.937	2.35049e-38	1.20235e-38	-0.68912	0.872	0.957	2.44618e-34	4.35981e-42	-1.18102	0.857	0.961	8.87004e-38	8.57116e-48	-0.998836	0.878	0.951	1.7438e-43	5.23034e-40	-0.857727	0.869	0.95	1.06411e-35	2.45978e-28	6.85693e-47
Rps14	3.64431e-34	-1.17955	0.485	0.92	7.41435e-30	1.95254e-36	-0.981619	0.705	0.905	3.97245e-32	1.02818e-40	-1.04437	0.837	0.949	2.09184e-36	2.06112e-40	-1.08412	0.654	0.893	4.19336e-36	1.34665e-40	-0.823614	0.753	0.906	2.73975e-36	2.04182e-40	-1.18314	0.765	0.933	4.15408e-36	2.02454e-50	-1.13209	0.762	0.932	4.11893e-46	8.03467e-34	-0.831045	0.691	0.892	1.63465e-29	8.03467e-34	1.61963e-49
Rps3a1	3.26722e-35	-1.36573	0.35	0.871	6.64715e-31	2.3113e-37	-1.22452	0.548	0.816	4.70234e-33	8.60813e-43	-1.29479	0.563	0.887	1.75132e-38	1.71602e-43	-1.3981	0.506	0.817	3.49125e-39	1.79769e-47	-1.07311	0.507	0.835	3.65741e-43	1.66048e-36	-1.18434	0.655	0.886	3.37824e-32	1.95987e-48	-1.3365	0.61	0.86	3.98735e-44	3.54473e-39	-1.03265	0.424	0.809	7.21176e-35	3.26722e-35	1.56789e-47
Rps6	7.25134e-36	-1.3535	0.369	0.888	1.47529e-31	7.95568e-29	-0.840998	0.633	0.841	1.61858e-24	8.19399e-42	-1.1609	0.607	0.909	1.66707e-37	2.95649e-44	-1.33555	0.436	0.833	6.01497e-40	2.08624e-49	-1.0744	0.484	0.845	4.24446e-45	3.51977e-37	-1.18546	0.689	0.896	7.16098e-33	2.89243e-49	-1.24456	0.585	0.876	5.88465e-45	3.90077e-38	-0.981615	0.513	0.827	7.93612e-34	7.95568e-29	1.66899e-48
Rpl37a	5.59691e-36	-1.1418	0.612	0.932	1.13869e-31	4.62694e-27	-0.748565	0.771	0.909	9.41352e-23	6.60751e-45	-1.14134	0.785	0.944	1.3443e-40	3.91318e-42	-1.09614	0.635	0.89	7.96136e-38	1.72343e-39	-0.752082	0.763	0.907	3.50631e-35	1.39294e-39	-1.20228	0.723	0.926	2.83394e-35	3.24586e-47	-1.10263	0.683	0.914	6.60369e-43	1.15189e-39	-0.877874	0.754	0.917	2.34351e-35	4.62694e-27	2.59668e-46
Rps28	2.66986e-27	-0.902154	0.612	0.928	5.43184e-23	1.72359e-23	-0.712558	0.693	0.861	3.50665e-19	4.32336e-34	-0.945946	0.733	0.907	8.79587e-30	3.35101e-34	-0.94818	0.551	0.856	6.81763e-30	7.27097e-36	-0.761074	0.616	0.865	1.47928e-31	4.78568e-39	-1.23351	0.63	0.887	9.73647e-35	3.30784e-43	-1.04552	0.61	0.878	6.7298e-39	8.34651e-38	-0.935445	0.555	0.859	1.6981e-33	1.72359e-23	2.64627e-42
Rps19	5.64358e-37	-1.29005	0.534	0.914	1.14819e-32	4.00086e-33	-1.01953	0.723	0.888	8.13974e-29	1.47942e-43	-1.2676	0.815	0.932	3.00988e-39	1.38585e-44	-1.29129	0.603	0.882	2.81952e-40	5.06285e-50	-1.0452	0.712	0.9	1.03004e-45	1.26852e-38	-1.24144	0.748	0.924	2.58081e-34	4.87818e-51	-1.25344	0.72	0.919	9.92465e-47	1.2625e-43	-1.03785	0.597	0.874	2.56855e-39	4.00086e-33	3.90254e-50
Rps27a	1.03549e-31	-1.08851	0.524	0.919	2.10671e-27	2.56592e-32	-0.875347	0.765	0.905	5.22037e-28	4.65636e-46	-1.16165	0.83	0.948	9.47336e-42	9.80839e-45	-1.17218	0.673	0.901	1.99552e-40	5.97218e-45	-0.867607	0.758	0.917	1.21504e-40	9.81981e-42	-1.26629	0.748	0.925	1.99784e-37	1.16025e-53	-1.22011	0.756	0.927	2.36053e-49	6.54948e-40	-0.921309	0.581	0.878	1.33249e-35	1.03549e-31	9.28201e-53
Rpl35a	1.04521e-36	-1.25417	0.534	0.917	2.12649e-32	2.54942e-35	-1.04231	0.753	0.895	5.1868e-31	4.45785e-46	-1.29353	0.711	0.934	9.06949e-42	2.59882e-44	-1.26645	0.622	0.881	5.2873e-40	6.18968e-49	-1.00018	0.662	0.903	1.25929e-44	1.33299e-42	-1.35502	0.739	0.922	2.71197e-38	1.58992e-50	-1.22008	0.75	0.917	3.23469e-46	1.9999e-42	-1.03351	0.555	0.862	4.0688e-38	2.54942e-35	1.27193e-49

## Sheet: Vgat2
	P23F_p_val	P23F_avg_logFC	P23F_pct.1	P23F_pct.2	P23F_p_val_adj	AF_p_val	AF_avg_logFC	AF_pct.1	AF_pct.2	AF_p_val_adj	P35F_p_val	P35F_avg_logFC	P35F_pct.1	P35F_pct.2	P35F_p_val_adj	Cast_p_val	Cast_avg_logFC	Cast_pct.1	Cast_pct.2	Cast_p_val_adj	OVX_p_val	OVX_avg_logFC	OVX_pct.1	OVX_pct.2	OVX_p_val_adj	AM_p_val	AM_avg_logFC	AM_pct.1	AM_pct.2	AM_p_val_adj	P35M_p_val	P35M_avg_logFC	P35M_pct.1	P35M_pct.2	P35M_p_val_adj	P23M_p_val	P23M_avg_logFC	P23M_pct.1	P23M_pct.2	P23M_p_val_adj	max_pval	minimump_p_val
Nts	3.75756e-09	0.399052	0.282	0.112	7.64475e-05	7.62561e-34	0.806467	0.687	0.159	1.55143e-29	1.26251e-37	0.657826	0.538	0.145	2.56858e-33	1.892e-60	0.791216	0.592	0.099	3.84928e-56	2.72261e-24	0.414634	0.347	0.092	5.53916e-20	3.08137e-90	1.34468	0.79	0.119	6.26904e-86	7.73869e-85	1.09245	0.7	0.14	1.57444e-80	1.0012e-15	0.708023	0.446	0.118	2.03693e-11	3.75756e-09	2.46509e-89
Irs4	1.71679e-17	0.407096	0.831	0.42	3.4928e-13	5.81539e-33	0.913394	0.94	0.374	1.18314e-28	1.13692e-25	0.485578	0.873	0.43	2.31306e-21	5.91063e-29	0.574813	0.856	0.35	1.20252e-24	2.66865e-29	0.500275	0.782	0.332	5.42938e-25	1.31691e-53	1.12162	0.99	0.398	2.67926e-49	1.97868e-66	0.946083	0.988	0.447	4.02562e-62	6.80211e-19	0.783541	0.862	0.406	1.38389e-14	1.71679e-17	1.58294e-65
Napb	7.58418e-21	0.525768	0.993	0.674	1.543e-16	6.65559e-30	0.957046	0.988	0.604	1.35408e-25	5.76498e-32	0.665417	0.987	0.709	1.17289e-27	4.64381e-19	0.483901	0.976	0.642	9.44783e-15	1.31958e-20	0.429673	0.988	0.629	2.68469e-16	2.11001e-46	1.11048	1	0.714	4.29282e-42	5.25838e-67	1.01026	1	0.703	1.06982e-62	7.01852e-08	0.423806	0.954	0.655	0.00142792	7.01852e-08	4.20671e-66
Ntng1	8.88334e-19	0.622756	0.669	0.309	1.80732e-14	1.25628e-29	0.784958	0.88	0.309	2.55589e-25	4.81003e-44	0.802445	0.842	0.319	9.78601e-40	4.61904e-51	1.10304	0.832	0.269	9.39743e-47	4.20364e-31	0.567191	0.724	0.29	8.55231e-27	2.66764e-46	0.882232	0.819	0.234	5.42731e-42	9.15464e-81	0.98746	0.918	0.279	1.86251e-76	1.11588e-33	0.982446	0.877	0.231	2.27025e-29	8.88334e-19	7.32371e-80
Pdzrn4	3.40886e-21	0.431256	0.458	0.15	6.93532e-17	3.70353e-39	0.78772	0.867	0.244	7.53483e-35	7.06185e-26	0.333772	0.646	0.235	1.43673e-21	2.01455e-33	0.579957	0.696	0.223	4.09861e-29	9.21149e-17	0.259355	0.388	0.144	1.87408e-12	4.41514e-51	0.820764	0.924	0.287	8.98261e-47	7.75698e-86	0.881924	0.9	0.248	1.57816e-81	7.56918e-33	0.791535	0.631	0.13	1.53995e-28	9.21149e-17	6.20559e-85
Gad2	1.98221e-16	0.416846	0.986	0.663	4.0328e-12	1.49515e-27	0.811285	1	0.616	3.04188e-23	1.44913e-38	0.634055	1	0.682	2.94826e-34	6.52352e-35	0.7101	1	0.611	1.32721e-30	9.79503e-39	0.639553	0.988	0.616	1.9928e-34	9.64853e-32	0.728972	1	0.672	1.96299e-27	8.56764e-41	0.665218	1	0.661	1.74309e-36	5.19248e-18	0.657648	1	0.675	1.05641e-13	1.98221e-16	6.85411e-40
Dlx1	1.01127e-25	0.490071	0.761	0.293	2.05743e-21	6.22089e-30	0.683013	0.819	0.247	1.26564e-25	1.41033e-38	0.497934	0.861	0.304	2.86933e-34	1.82601e-39	0.542805	0.816	0.238	3.71503e-35	2.08778e-49	0.515948	0.776	0.229	4.24759e-45	1.85223e-50	0.698596	0.924	0.247	3.76836e-46	3.19022e-64	0.66989	0.894	0.262	6.4905e-60	2.16787e-25	0.718327	0.754	0.219	4.41053e-21	2.16787e-25	2.55217e-63
Vsnl1	2.32809e-15	0.390078	0.824	0.444	4.73649e-11	1.98583e-19	0.598376	0.88	0.399	4.04016e-15	6.16491e-23	0.482394	0.924	0.512	1.25425e-18	9.73635e-23	0.508455	0.92	0.475	1.98086e-18	1.51568e-15	0.391367	0.806	0.453	3.08364e-11	6.01484e-29	0.679735	0.971	0.55	1.22372e-24	4.59563e-33	0.57621	0.941	0.517	9.34981e-29	3.49285e-07	0.351318	0.877	0.543	0.00710619	3.49285e-07	3.67651e-32
Ar	5.59251e-20	0.530668	0.711	0.328	1.1378e-15	4.04742e-24	0.71338	0.892	0.372	8.23448e-20	5.79471e-30	0.613788	0.829	0.394	1.17893e-25	1.26748e-23	0.581577	0.816	0.389	2.57869e-19	1.90287e-39	0.713476	0.806	0.337	3.87139e-35	2.53076e-26	0.664419	0.876	0.393	5.14883e-22	1.10199e-45	0.757947	0.894	0.396	2.24199e-41	8.43564e-15	0.53604	0.692	0.259	1.71623e-10	8.43564e-15	8.81589e-45
Nr2f2	3.03848e-21	0.490033	0.577	0.213	6.18179e-17	1.33158e-13	0.356109	0.518	0.171	2.7091e-09	1.28981e-22	0.462504	0.646	0.265	2.62411e-18	4.54659e-21	0.411375	0.568	0.192	9.25004e-17	4.29763e-21	0.399017	0.518	0.196	8.74352e-17	5.93159e-39	0.643376	0.81	0.225	1.20678e-34	3.03176e-56	0.748561	0.753	0.212	6.16812e-52	5.66048e-21	0.615271	0.446	0.094	1.15162e-16	1.33158e-13	2.42541e-55
Id4	2.37789e-06	0.252039	0.535	0.323	0.0483781	4.57142e-21	0.564283	0.783	0.284	9.30055e-17	2.26663e-23	0.36739	0.703	0.283	4.61146e-19	7.04553e-22	0.514691	0.64	0.251	1.43341e-17	9.88677e-19	0.300311	0.541	0.22	2.01146e-14	1.33939e-27	0.620901	0.829	0.335	2.72498e-23	6.86456e-60	0.724733	0.9	0.307	1.3966e-55	7.95171e-10	0.389449	0.6	0.244	1.61778e-05	2.37789e-06	5.49165e-59
Snca	1.24048e-24	0.547215	0.648	0.252	2.52377e-20	4.54669e-12	0.452523	0.542	0.207	9.25023e-08	5.47585e-18	0.420554	0.608	0.282	1.11406e-13	6.7419e-27	0.562109	0.672	0.246	1.37164e-22	3.28406e-30	0.551459	0.6	0.227	6.68143e-26	2.63713e-23	0.616015	0.676	0.259	5.36524e-19	1.8974e-44	0.618648	0.759	0.268	3.86025e-40	1.99226e-17	0.707072	0.708	0.273	4.05326e-13	4.54669e-12	1.51792e-43
Ecel1	7.6314e-14	0.390879	0.542	0.242	1.55261e-09	1.1459e-13	0.306408	0.651	0.249	2.33134e-09	1.47156e-21	0.370787	0.677	0.283	2.99388e-17	1.21453e-41	0.610369	0.784	0.229	2.47097e-37	1.64599e-21	0.305574	0.547	0.207	3.34876e-17	2.06948e-27	0.595754	0.81	0.306	4.21036e-23	7.94907e-51	0.620247	0.847	0.283	1.61724e-46	1.20863e-21	0.765409	0.815	0.297	2.45897e-17	1.1459e-13	6.35925e-50
Syn2	1.21617e-11	0.308157	0.937	0.66	2.4743e-07	3.50486e-10	0.383764	0.94	0.545	7.13064e-06	7.93819e-25	0.496342	0.956	0.635	1.61502e-20	9.81979e-29	0.645883	0.96	0.564	1.99784e-24	1.13337e-25	0.509749	0.918	0.537	2.30584e-21	8.82035e-24	0.577855	1	0.655	1.7945e-19	2.74391e-33	0.555294	0.976	0.633	5.58248e-29	2.04185e-09	0.45701	0.908	0.615	4.15414e-05	2.04185e-09	2.19513e-32
Zfhx4	6.15725e-26	0.571037	0.739	0.307	1.25269e-21	5.09666e-28	0.589356	0.904	0.312	1.03692e-23	3.49443e-40	0.522921	0.842	0.312	7.10941e-36	2.67598e-39	0.648907	0.848	0.288	5.44429e-35	1.07114e-43	0.602394	0.8	0.281	2.17924e-39	9.16786e-27	0.56421	0.838	0.32	1.8652e-22	6.28431e-42	0.564266	0.853	0.336	1.27854e-37	1.07423e-17	0.520739	0.831	0.311	2.18552e-13	1.07423e-17	8.56915e-43
Hap1	1.97812e-23	0.436077	0.993	0.826	4.02448e-19	3.66763e-19	0.543242	1	0.771	7.4618e-15	1.69808e-23	0.404327	0.994	0.833	3.45474e-19	7.57006e-26	0.50725	1	0.77	1.54013e-21	6.16424e-25	0.438157	0.988	0.73	1.25411e-20	2.56452e-28	0.558304	1	0.831	5.21752e-24	2.15893e-38	0.521825	1	0.829	4.39234e-34	4.30222e-11	0.423436	0.985	0.83	8.75287e-07	4.30222e-11	1.72714e-37
Prkar1b	4.08426e-11	0.316771	0.972	0.737	8.30942e-07	2.21095e-15	0.486639	1	0.626	4.49818e-11	4.52687e-18	0.375013	0.994	0.756	9.20991e-14	2.83073e-17	0.43098	0.992	0.669	5.75911e-13	6.32607e-23	0.474019	0.988	0.653	1.28704e-18	4.42538e-23	0.538532	1	0.749	9.00343e-19	2.3329e-30	0.496111	1	0.736	4.74629e-26	2.22783e-07	0.367283	0.969	0.711	0.00453252	2.22783e-07	1.86632e-29
Calb2	3.67829e-18	0.375091	0.521	0.194	7.48348e-14	8.70009e-18	0.360863	0.53	0.154	1.77003e-13	1.36022e-36	0.452983	0.69	0.219	2.76737e-32	2.53474e-37	0.613284	0.664	0.195	5.15693e-33	2.21312e-33	0.45128	0.6	0.193	4.50259e-29	1.47228e-26	0.529394	0.724	0.246	2.99535e-22	4.49623e-50	0.570797	0.747	0.229	9.14758e-46	2.77495e-14	0.451094	0.646	0.235	5.64563e-10	2.77495e-14	3.59698e-49
Nsf	7.65134e-17	0.431586	0.986	0.713	1.55666e-12	4.09142e-17	0.540848	0.976	0.63	8.32398e-13	2.81015e-30	0.513123	0.994	0.737	5.71726e-26	1.01677e-26	0.578779	1	0.664	2.06862e-22	1.04189e-25	0.484906	0.982	0.646	2.11972e-21	3.79968e-23	0.523398	0.99	0.726	7.73045e-19	4.69817e-39	0.576271	1	0.718	9.55843e-35	4.2097e-12	0.517234	0.985	0.677	8.56464e-08	4.2097e-12	3.75854e-38
Rgs10	1.13645e-28	0.739083	0.894	0.471	2.31211e-24	7.89937e-23	0.677969	0.952	0.427	1.60713e-18	1.92239e-29	0.571093	0.943	0.544	3.91109e-25	1.48702e-20	0.53296	0.872	0.454	3.02534e-16	1.77506e-33	0.687867	0.876	0.461	3.61136e-29	9.46321e-19	0.517691	0.905	0.504	1.92529e-14	7.23351e-27	0.500632	0.912	0.485	1.47166e-22	5.89793e-11	0.556102	0.862	0.468	1.19993e-06	5.89793e-11	1.42005e-32
Ywhag	1.04739e-12	0.319964	1	0.84	2.13091e-08	1.03022e-23	0.616621	1	0.721	2.09599e-19	2.01071e-32	0.4474	1	0.826	4.0908e-28	4.16196e-18	0.421528	1	0.768	8.46751e-14	1.30272e-25	0.438555	1	0.734	2.65038e-21	5.19904e-27	0.515409	1	0.791	1.05774e-22	6.85412e-46	0.532959	1	0.814	1.39447e-41	7.57151e-07	0.325561	0.985	0.804	0.0154042	7.57151e-07	5.4833e-45
Gap43	2.27919e-15	0.38333	1	0.797	4.63702e-11	7.13034e-17	0.521573	1	0.711	1.45067e-12	1.1798e-22	0.40319	1	0.818	2.40031e-18	9.60705e-21	0.477037	1	0.754	1.95455e-16	3.46086e-26	0.478171	1	0.728	7.04111e-22	7.17553e-24	0.511916	1	0.827	1.45986e-19	1.68092e-30	0.482646	1	0.792	3.41982e-26	1.14813e-06	0.331954	0.985	0.727	0.0233587	1.14813e-06	1.34473e-29
Nefl	2.87835e-09	0.359836	0.577	0.347	5.856e-05	2.16568e-15	0.417615	0.747	0.303	4.40608e-11	1.81386e-16	0.330647	0.734	0.38	3.69029e-12	4.6785e-20	0.457577	0.752	0.334	9.51841e-16	1.39832e-12	0.254434	0.653	0.346	2.84488e-08	1.87043e-21	0.50747	0.867	0.415	3.80539e-17	3.7044e-23	0.398931	0.824	0.406	7.5366e-19	1.75278e-06	0.290581	0.692	0.368	0.0356603	1.75278e-06	2.96352e-22
Lonrf2	1.28043e-13	0.386218	0.923	0.619	2.60503e-09	4.40978e-20	0.621341	0.976	0.541	8.97171e-16	5.05202e-14	0.333828	0.968	0.654	1.02783e-09	7.73571e-10	0.270077	0.912	0.572	1.57383e-05	5.55093e-17	0.369324	0.888	0.541	1.12934e-12	1.22331e-19	0.506021	0.981	0.636	2.48883e-15	3.96213e-25	0.441459	0.953	0.644	8.06095e-21	8.09063e-11	0.46614	0.954	0.611	1.64604e-06	7.73571e-10	3.1697e-24
Cadps2	4.5732e-12	0.37074	0.408	0.172	9.30417e-08	4.34369e-10	0.332159	0.446	0.171	8.83725e-06	1.16003e-30	0.446309	0.589	0.186	2.36007e-26	2.4967e-24	0.563361	0.536	0.17	5.07953e-20	2.03482e-31	0.488042	0.518	0.16	4.13985e-27	3.3012e-28	0.50069	0.619	0.177	6.71629e-24	2.11671e-36	0.572494	0.6	0.193	4.30645e-32	5.18835e-13	0.472447	0.554	0.193	1.05557e-08	4.34369e-10	1.69337e-35
Lypd1	2.82168e-20	0.672543	0.606	0.27	5.7407e-16	3.33875e-10	0.517372	0.506	0.215	6.79269e-06	2.17422e-23	0.64374	0.639	0.294	4.42345e-19	1.66899e-21	0.620292	0.568	0.205	3.39557e-17	8.53277e-23	0.65869	0.565	0.244	1.73599e-18	4.50853e-07	0.491908	0.419	0.224	0.0091726	4.10423e-15	0.511845	0.5	0.239	8.35006e-11	2.49767e-10	0.570268	0.538	0.211	5.0815e-06	4.50853e-07	1.73938e-22
Esr1	1.34633e-51	0.73998	0.697	0.163	2.7391e-47	2.26837e-52	0.902539	0.892	0.191	4.61499e-48	4.96021e-55	0.692349	0.829	0.242	1.00915e-50	9.1465e-78	0.908684	0.84	0.167	1.86086e-73	7.31828e-117	1.0059	0.871	0.157	1.4889e-112	1.8683e-46	0.491792	0.619	0.119	3.80106e-42	3.44906e-65	0.537565	0.641	0.133	7.01711e-61	1.29038e-34	0.695979	0.569	0.1	2.62527e-30	1.29038e-34	5.85462e-116
Gad1	2.02304e-12	0.276587	0.887	0.476	4.11587e-08	3.40364e-20	0.554797	0.928	0.391	6.92471e-16	3.82332e-29	0.463981	0.987	0.491	7.77855e-25	3.99273e-16	0.301682	0.904	0.416	8.1232e-12	6.38109e-26	0.380528	0.924	0.414	1.29823e-21	3.83562e-22	0.49088	0.962	0.446	7.80358e-18	3.30129e-27	0.430876	0.912	0.428	6.71648e-23	2.32568e-07	0.261036	0.831	0.429	0.00473161	2.32568e-07	3.05866e-28
Calm3	9.01593e-11	0.295438	0.979	0.778	1.83429e-06	1.80835e-12	0.453433	0.988	0.669	3.67908e-08	2.78678e-18	0.367061	1	0.779	5.66971e-14	4.83431e-09	0.280413	0.968	0.675	9.8354e-05	2.73861e-09	0.258917	0.953	0.687	5.57171e-05	7.43799e-22	0.490618	1	0.784	1.51326e-17	4.29047e-24	0.415296	0.994	0.754	8.72896e-20	1.34887e-06	0.331577	0.985	0.722	0.0274428	1.34887e-06	3.43238e-23
Nrgn	1.21144e-41	1.03423	0.592	0.157	2.46468e-37	1.96855e-18	0.491853	0.422	0.107	4.00502e-14	1.54366e-47	0.785828	0.627	0.171	3.14057e-43	6.84081e-48	0.575916	0.648	0.143	1.39176e-43	4.301e-39	0.770242	0.529	0.153	8.75038e-35	7.53094e-32	0.48116	0.6	0.154	1.53217e-27	5.43023e-83	0.698964	0.688	0.132	1.10478e-78	6.85458e-20	0.707283	0.6	0.177	1.39456e-15	1.96855e-18	4.34419e-82
Dcun1d4	5.862e-13	0.363086	0.599	0.311	1.19262e-08	1.20804e-16	0.390972	0.759	0.306	2.45776e-12	3.6062e-22	0.368484	0.778	0.366	7.33681e-18	1.65317e-18	0.356191	0.68	0.293	3.36338e-14	5.25894e-14	0.251286	0.618	0.316	1.06993e-09	3.67387e-20	0.47806	0.81	0.381	7.4745e-16	1.23423e-21	0.380531	0.8	0.396	2.51103e-17	4.01101e-13	0.527134	0.723	0.33	8.1604e-09	5.862e-13	2.88496e-21
Ppp3r1	5.40346e-13	0.382123	0.944	0.689	1.09933e-08	3.27301e-10	0.365636	0.964	0.588	6.65894e-06	3.82923e-15	0.331723	0.981	0.716	7.79058e-11	1.08229e-15	0.422807	0.984	0.639	2.20192e-11	1.68381e-16	0.346653	0.971	0.618	3.42571e-12	7.00036e-19	0.469762	1	0.689	1.42422e-14	5.88713e-30	0.459754	1	0.701	1.19774e-25	6.39887e-09	0.416567	0.969	0.661	0.000130185	6.39887e-09	4.70971e-29
Stxbp1	3.01719e-10	0.314608	0.993	0.747	6.13846e-06	1.6457e-10	0.407242	0.988	0.659	3.34818e-06	1.65643e-17	0.351276	1	0.767	3.37e-13	2.3785e-18	0.418205	1	0.711	4.83905e-14	2.0223e-17	0.378208	0.988	0.682	4.11438e-13	1.17931e-20	0.469686	1	0.785	2.39932e-16	1.36105e-31	0.475624	1	0.756	2.76906e-27	3.9209e-07	0.359299	0.969	0.751	0.00797706	3.9209e-07	1.08884e-30
Nap1l5	1.11823e-30	0.47173	1	0.935	2.27503e-26	8.9445e-24	0.614904	0.988	0.914	1.81976e-19	5.49235e-32	0.488423	1	0.945	1.11742e-27	8.94195e-31	0.505107	1	0.919	1.81924e-26	4.17435e-42	0.554054	1	0.915	8.49271e-38	5.12258e-24	0.468682	1	0.934	1.04219e-19	1.4811e-47	0.553674	1	0.94	3.01329e-43	3.12598e-13	0.43008	1	0.935	6.3598e-09	3.12598e-13	1.18488e-46
Vat1l	8.70475e-07	0.251775	0.817	0.575	0.0177098	4.85173e-17	0.503732	0.94	0.473	9.87084e-13	1.1434e-14	0.365543	0.93	0.584	2.32624e-10	3.18023e-17	0.461246	0.912	0.51	6.47017e-13	1.53617e-20	0.394775	0.882	0.479	3.12533e-16	2.08583e-13	0.460925	0.924	0.58	4.24363e-09	1.77014e-16	0.368656	0.947	0.568	3.60135e-12	1.46204e-07	0.420217	0.892	0.55	0.00297451	8.70475e-07	1.22893e-19
Rbfox3	2.8927e-13	0.314942	0.746	0.408	5.88519e-09	2.20459e-14	0.437004	0.843	0.412	4.48524e-10	2.22658e-15	0.328652	0.823	0.457	4.52997e-11	5.65699e-15	0.395926	0.8	0.436	1.15091e-10	2.7929e-15	0.26765	0.771	0.412	5.68215e-11	2.08493e-17	0.452062	0.905	0.51	4.2418e-13	2.97533e-23	0.394269	0.876	0.468	6.05331e-19	2.27762e-07	0.340233	0.785	0.448	0.00463381	2.27762e-07	2.38026e-22
Pcp4	1.11456e-08	0.443507	0.979	0.795	0.000226757	1.39944e-28	0.936465	1	0.84	2.84716e-24	1.71617e-23	0.654303	0.987	0.844	3.49154e-19	3.00811e-08	0.350269	0.984	0.785	0.000612	1.28096e-17	0.558198	0.988	0.829	2.60611e-13	6.1472e-11	0.436292	0.99	0.81	1.25065e-06	7.09345e-13	0.379032	0.994	0.863	1.44316e-08	2.70346e-05	0.356869	0.969	0.816	0.550019	2.70346e-05	1.11955e-27
Ywhab	7.1504e-10	0.276981	1	0.817	1.45475e-05	1.61287e-17	0.519078	1	0.677	3.28139e-13	3.23422e-23	0.418627	0.994	0.791	6.58002e-19	5.31425e-19	0.429145	1	0.732	1.08118e-14	4.59245e-18	0.388392	0.994	0.711	9.34334e-14	1.18671e-16	0.434691	1	0.771	2.41437e-12	2.64279e-26	0.419309	1	0.771	5.37675e-22	3.01336e-08	0.387037	0.985	0.729	0.000613068	3.01336e-08	2.11423e-25
Zcchc12	4.09188e-20	0.481631	0.979	0.676	8.32492e-16	2.61267e-17	0.584319	1	0.603	5.31549e-13	2.88788e-16	0.344217	0.987	0.725	5.87539e-12	1.02905e-16	0.473084	0.944	0.643	2.0936e-12	1.59926e-27	0.550631	0.976	0.603	3.2537e-23	7.64943e-15	0.432422	0.971	0.689	1.55628e-10	1.56994e-18	0.375541	0.965	0.688	3.19403e-14	3.87663e-08	0.397295	0.954	0.614	0.0007887	3.87663e-08	1.27941e-26
Calm1	3.99082e-08	0.251936	0.993	0.832	0.000811932	1.67599e-11	0.399033	1	0.733	3.4098e-07	2.32668e-15	0.305151	1	0.847	4.73362e-11	5.80914e-15	0.370607	1	0.769	1.18187e-10	3.61103e-16	0.349592	1	0.756	7.34664e-12	4.26536e-20	0.428498	1	0.814	8.67788e-16	7.29948e-28	0.413527	1	0.822	1.48508e-23	8.48954e-09	0.372811	1	0.826	0.00017272	3.99082e-08	5.83959e-27
Hpca	1.30061e-29	0.483743	0.549	0.164	2.64608e-25	3.50831e-26	0.428093	0.602	0.15	7.13766e-22	4.77318e-35	0.419493	0.627	0.195	9.71103e-31	2.95819e-33	0.415037	0.568	0.149	6.01843e-29	6.2856e-42	0.501479	0.553	0.152	1.2788e-37	4.64603e-31	0.423607	0.648	0.174	9.45234e-27	1.57292e-46	0.458688	0.612	0.161	3.2001e-42	5.87034e-18	0.597613	0.662	0.225	1.19432e-13	5.87034e-18	1.25833e-45
Kcnq3	9.12207e-12	0.318963	0.458	0.212	1.85588e-07	1.54461e-17	0.332319	0.627	0.202	3.1425e-13	1.77799e-22	0.36301	0.639	0.255	3.61732e-18	7.37472e-15	0.31955	0.576	0.244	1.50039e-10	9.04052e-23	0.36097	0.541	0.207	1.83929e-18	5.63595e-20	0.415269	0.676	0.254	1.14663e-15	7.46588e-24	0.37832	0.659	0.278	1.51893e-19	8.53953e-09	0.286082	0.585	0.238	0.000173737	8.53953e-09	5.9727e-23
Basp1	4.62063e-23	0.475298	1	0.774	9.40067e-19	3.84192e-22	0.659856	1	0.607	7.81639e-18	4.57515e-25	0.461096	1	0.749	9.30815e-21	1.54348e-23	0.533816	1	0.677	3.14022e-19	1.71315e-36	0.596706	0.994	0.642	3.4854e-32	7.99751e-14	0.408943	0.99	0.736	1.62709e-09	3.84804e-36	0.54722	0.994	0.722	7.82883e-32	1.52341e-09	0.474466	0.985	0.706	3.09938e-05	1.52341e-09	1.37052e-35
Tmsb10	2.73978e-25	0.415217	1	0.93	5.57409e-21	5.49602e-24	0.581359	1	0.829	1.11817e-19	5.74661e-25	0.398165	1	0.903	1.16915e-20	6.98706e-23	0.439974	1	0.826	1.42152e-18	7.86258e-38	0.503515	1	0.864	1.59964e-33	2.51616e-19	0.401238	1	0.891	5.11913e-15	8.49485e-29	0.419325	1	0.883	1.72828e-24	3.51272e-14	0.442741	1	0.936	7.14663e-10	3.51272e-14	6.29007e-37
Pcdh20	2.67559e-19	0.317528	0.451	0.147	5.44348e-15	5.83796e-17	0.267975	0.542	0.157	1.18773e-12	1.48496e-35	0.401227	0.589	0.166	3.02114e-31	4.16943e-45	0.547646	0.616	0.136	8.4827e-41	4.30982e-53	0.487363	0.553	0.12	8.76832e-49	7.91777e-34	0.382807	0.581	0.134	1.61087e-29	8.2308e-55	0.492899	0.671	0.168	1.67456e-50	4.29667e-15	0.479452	0.554	0.177	8.74158e-11	4.29667e-15	6.58464e-54
Ppp3ca	1.75301e-19	0.469196	0.979	0.724	3.56649e-15	2.09069e-17	0.603099	1	0.685	4.25351e-13	9.46777e-26	0.500076	0.994	0.778	1.92622e-21	9.41873e-14	0.372719	0.984	0.733	1.91624e-09	2.30865e-18	0.41684	0.982	0.686	4.69694e-14	2.31914e-13	0.380764	0.99	0.758	4.71829e-09	5.14829e-28	0.488107	1	0.771	1.04742e-23	8.12264e-08	0.361931	0.969	0.702	0.00165255	8.12264e-08	4.11863e-27
Gng2	2.13171e-23	0.517876	0.986	0.678	4.33697e-19	4.45837e-16	0.506276	0.988	0.581	9.07055e-12	5.25179e-18	0.394541	0.962	0.701	1.06848e-13	6.0879e-15	0.394067	0.984	0.627	1.23858e-10	6.38541e-26	0.474519	0.971	0.598	1.29911e-21	3.01689e-12	0.362145	0.981	0.677	6.13786e-08	3.34244e-21	0.419586	0.994	0.683	6.80018e-17	4.36813e-07	0.355173	0.969	0.646	0.00888695	4.36813e-07	5.10833e-25
Marcksl1	1.57434e-15	0.409698	0.972	0.684	3.20299e-11	1.00844e-16	0.543368	0.94	0.53	2.05166e-12	9.49927e-14	0.313581	0.956	0.63	1.93263e-09	6.37179e-13	0.362285	0.896	0.541	1.29634e-08	3.74394e-24	0.43055	0.918	0.512	7.61705e-20	8.33119e-13	0.360207	0.981	0.629	1.69498e-08	8.94537e-19	0.360913	0.965	0.625	1.81994e-14	1.20417e-07	0.365842	0.923	0.637	0.00244989	1.20417e-07	2.99515e-23
Hdac11	2.91617e-12	0.324261	0.894	0.595	5.93295e-08	2.65515e-07	0.261907	0.892	0.567	0.0054019	4.4421e-12	0.270616	0.943	0.655	9.03745e-08	9.35014e-14	0.322987	0.944	0.584	1.90229e-09	1.0823e-16	0.334259	0.924	0.562	2.20193e-12	1.25024e-11	0.336408	0.971	0.652	2.54362e-07	8.9121e-20	0.398114	0.971	0.654	1.81317e-15	4.60743e-08	0.429091	0.938	0.641	0.000937382	2.65515e-07	7.12968e-19
Ina	1.03763e-09	0.31551	0.859	0.572	2.11106e-05	5.02741e-10	0.362487	0.904	0.521	1.02283e-05	7.64208e-16	0.362695	0.93	0.598	1.55478e-11	3.48075e-13	0.366476	0.928	0.546	7.08159e-09	4.63379e-10	0.269042	0.806	0.513	9.42744e-06	1.20042e-10	0.32665	0.962	0.64	2.44225e-06	1.31439e-16	0.399266	0.918	0.613	2.67412e-12	2.0912e-05	0.314854	0.862	0.564	0.425454	2.0912e-05	1.05151e-15
Rgs17	1.27208e-11	0.325206	0.901	0.588	2.58805e-07	5.0727e-08	0.281886	0.964	0.54	0.00103204	2.15096e-13	0.306023	0.949	0.639	4.37613e-09	3.52526e-22	0.543002	0.984	0.58	7.17214e-18	6.88881e-17	0.370334	0.894	0.543	1.40153e-12	1.70514e-11	0.318358	0.933	0.608	3.4691e-07	3.02745e-21	0.420571	0.959	0.618	6.15935e-17	2.14122e-09	0.453947	0.846	0.54	4.3563e-05	5.0727e-08	2.82021e-21
Snap47	1.23393e-07	0.267643	0.789	0.528	0.00251043	6.03052e-10	0.315398	0.855	0.456	1.22691e-05	2.95897e-15	0.324696	0.924	0.565	6.02002e-11	2.84084e-16	0.398694	0.848	0.463	5.77969e-12	4.46178e-18	0.330406	0.841	0.443	9.07749e-14	1.02988e-09	0.316482	0.905	0.566	2.09529e-05	7.30068e-18	0.355875	0.935	0.537	1.48532e-13	1.01505e-06	0.323532	0.908	0.544	0.0206513	1.01505e-06	3.56942e-17
Atp6v1g2	4.47221e-08	0.294786	0.873	0.604	0.000909871	1.79091e-10	0.332803	0.904	0.514	3.64361e-06	1.37491e-15	0.347592	0.93	0.622	2.79726e-11	6.21287e-10	0.279609	0.88	0.541	1.26401e-05	4.63938e-15	0.34172	0.894	0.535	9.43882e-11	4.36474e-10	0.309085	0.952	0.647	8.88005e-06	2.31776e-22	0.405136	0.947	0.591	4.71549e-18	2.67593e-05	0.281088	0.892	0.6	0.544417	2.67593e-05	1.85421e-21
Ahi1	8.55223e-18	0.351194	1	0.896	1.73995e-13	1.08166e-16	0.464295	1	0.856	2.20064e-12	1.36279e-24	0.368087	1	0.917	2.7726e-20	5.38355e-19	0.360753	1	0.909	1.09528e-14	6.47801e-27	0.426371	1	0.864	1.31795e-22	1.98077e-10	0.298464	1	0.882	4.02987e-06	1.1373e-22	0.347847	1	0.925	2.31383e-18	8.71886e-10	0.367866	0.985	0.902	1.77385e-05	8.71886e-10	5.18241e-26
Selenow	2.80906e-18	0.359483	1	0.882	5.71504e-14	1.16452e-18	0.517154	1	0.785	2.36922e-14	5.54499e-24	0.380338	1	0.876	1.12813e-19	6.55088e-18	0.417945	1	0.78	1.33278e-13	3.86158e-30	0.466385	1	0.787	7.85639e-26	1.15961e-10	0.295826	1	0.846	2.35922e-06	1.73419e-23	0.386267	1	0.844	3.5282e-19	1.88029e-09	0.356599	1	0.905	3.82545e-05	1.88029e-09	3.08927e-29
Anks1b	1.12923e-10	0.336463	0.754	0.462	2.29741e-06	1.62511e-12	0.407248	0.867	0.441	3.30629e-08	1.81221e-10	0.261252	0.816	0.512	3.68695e-06	1.43295e-10	0.267124	0.832	0.476	2.91533e-06	1.15012e-12	0.293101	0.759	0.443	2.33991e-08	1.25724e-08	0.287515	0.829	0.513	0.000255786	7.19433e-19	0.420684	0.871	0.514	1.46369e-14	6.45118e-08	0.445976	0.754	0.436	0.00131249	6.45118e-08	5.75546e-18
Ctxn1	2.74711e-17	0.477192	0.908	0.578	5.589e-13	5.09966e-16	0.485914	0.988	0.513	1.03753e-11	1.06513e-23	0.454062	0.962	0.614	2.167e-19	1.71005e-18	0.455413	0.928	0.525	3.4791e-14	1.1462e-30	0.554419	0.935	0.494	2.33194e-26	1.02483e-08	0.286254	0.914	0.619	0.000208503	9.60732e-19	0.356907	0.965	0.562	1.95461e-14	8.03399e-09	0.436897	0.923	0.538	0.000163452	1.02483e-08	9.16959e-30
Gabarapl1	7.22592e-10	0.279797	1	0.807	1.47011e-05	6.15631e-10	0.363676	1	0.727	1.2525e-05	4.22968e-11	0.261709	1	0.826	8.60528e-07	1.92856e-12	0.33748	1	0.76	3.92365e-08	4.63591e-16	0.353036	1	0.754	9.43176e-12	2.35234e-08	0.280363	1	0.812	0.000478585	1.36739e-15	0.310894	1	0.788	2.78196e-11	4.49733e-06	0.320237	1	0.744	0.0914982	4.49733e-06	3.70873e-15
Bub3	5.77193e-19	0.462013	0.739	0.348	1.1743e-14	3.0794e-12	0.380877	0.759	0.35	6.26504e-08	1.31296e-18	0.376857	0.797	0.404	2.67122e-14	3.38298e-18	0.295629	0.744	0.319	6.88267e-14	1.72228e-18	0.354452	0.665	0.323	3.50398e-14	1.3325e-10	0.277078	0.771	0.42	2.71097e-06	2.00895e-16	0.323015	0.747	0.378	4.08721e-12	9.18134e-06	0.352347	0.6	0.352	0.186794	9.18134e-06	4.61755e-18
Rgs2	7.48739e-22	0.640685	0.592	0.257	1.52331e-17	1.59632e-15	0.405465	0.53	0.177	3.24771e-11	1.69312e-37	0.583924	0.759	0.281	3.44466e-33	1.51e-29	0.612698	0.656	0.226	3.0721e-25	3.69131e-44	0.601831	0.659	0.202	7.50997e-40	5.01159e-12	0.26572	0.581	0.259	1.01961e-07	2.65142e-32	0.447168	0.694	0.267	5.39432e-28	5.90826e-12	0.415532	0.6	0.23	1.20204e-07	5.90826e-12	2.95305e-43
Fam84a	2.55735e-16	0.39703	0.458	0.179	5.20293e-12	7.19089e-13	0.265688	0.482	0.158	1.46299e-08	1.8814e-17	0.291892	0.475	0.18	3.82772e-13	1.68087e-16	0.326529	0.472	0.168	3.41973e-12	3.17353e-20	0.295941	0.453	0.164	6.45655e-16	9.52896e-14	0.254813	0.524	0.197	1.93867e-09	2.66761e-24	0.361963	0.529	0.19	5.42726e-20	1.17562e-09	0.387845	0.492	0.193	2.39179e-05	1.17562e-09	2.13409e-23
Rnf128	0.00244823	-0.322486	0.113	0.212	1	0.242449	-0.321819	0.205	0.233	1	0.0216497	-0.345673	0.19	0.243	1	0.00488306	-0.358532	0.136	0.235	1	0.00385787	-0.398779	0.141	0.218	1	0.1019	-0.269699	0.21	0.252	1	0.00610791	-0.350555	0.218	0.282	1	0.0525449	-0.475068	0.231	0.305	1	0.242449	0.0194188
Tcf4	0.202129	-0.349075	0.275	0.287	1	0.895295	-0.362815	0.398	0.333	1	0.181423	-0.406499	0.348	0.331	1	0.0111178	-0.551992	0.24	0.304	1	0.218724	-0.425514	0.276	0.276	1	0.752871	-0.306062	0.295	0.264	1	0.539401	-0.304686	0.341	0.308	1	0.173582	-0.334575	0.231	0.288	1	0.895295	0.085557
Cst3	0.125006	-0.336943	0.648	0.595	1	0.0195095	-0.54679	0.699	0.618	1	0.243721	-0.34693	0.804	0.651	1	0.300037	-0.362081	0.672	0.568	1	0.626493	-0.295942	0.676	0.548	1	0.201066	-0.345263	0.695	0.564	1	0.261509	-0.302843	0.753	0.594	1	0.14166	-0.335785	0.785	0.689	1	0.626493	0.145824
Zic4	0.000222156	-0.314165	0.035	0.143	1	0.00331174	-0.327145	0.036	0.149	1	0.000747179	-0.250081	0.032	0.115	1	0.00323608	-0.272843	0.04	0.125	1	3.31061e-05	-0.279398	0.018	0.12	0.673544	0.000463489	-0.348999	0.057	0.185	1	1.39489e-06	-0.342598	0.024	0.157	0.0283791	0.0311453	-0.279173	0.062	0.152	1	0.0311453	1.11591e-05
Prkca	0.00169971	-0.404994	0.162	0.266	1	0.182223	-0.35266	0.241	0.273	1	0.0489828	-0.289704	0.234	0.273	1	0.00237706	-0.358069	0.16	0.259	1	0.0343946	-0.338537	0.182	0.231	1	0.00283301	-0.380861	0.19	0.302	1	9.42207e-05	-0.382021	0.176	0.289	1	0.00138662	-0.491148	0.138	0.307	1	0.182223	0.000753517
Zmym1	0.56503	-0.302371	0.803	0.66	1	0.870525	-0.376402	0.494	0.385	1	0.724675	-0.29322	0.595	0.458	1	0.17663	-0.29309	0.544	0.398	1	0.197994	-0.288295	0.476	0.357	1	0.798996	-0.38676	0.667	0.474	1	0.350456	-0.262485	0.635	0.485	1	0.527896	-0.296227	0.846	0.651	1	0.870525	0.788767
Clk1	0.212364	-0.355811	0.528	0.489	1	0.067653	-0.496193	0.651	0.569	1	0.123853	-0.371238	0.677	0.565	1	0.0576372	-0.483164	0.688	0.589	1	0.000895714	-0.537613	0.524	0.54	1	0.0634866	-0.403879	0.543	0.52	1	0.0104472	-0.399066	0.618	0.577	1	0.848509	-0.256335	0.662	0.578	1	0.848509	0.00714329
Nrp2	0.144522	-0.337324	0.408	0.395	1	0.161311	-0.428698	0.373	0.372	1	0.000604865	-0.43111	0.354	0.412	1	0.0418389	-0.427317	0.408	0.401	1	0.0177857	-0.436044	0.365	0.38	1	0.0258658	-0.414423	0.41	0.429	1	0.000763486	-0.422574	0.394	0.44	1	0.00974411	-0.566639	0.338	0.42	1	0.161311	0.00482869
Msi2	4.74321e-05	-0.510717	0.331	0.438	0.965007	0.842992	-0.31347	0.651	0.486	1	0.000248304	-0.427891	0.418	0.471	1	0.00565717	-0.478527	0.416	0.42	1	0.00864605	-0.413237	0.412	0.424	1	0.000765216	-0.44006	0.352	0.433	1	0.00202019	-0.392889	0.482	0.477	1	0.0125777	-0.416382	0.415	0.497	1	0.842992	0.000379394
Atp6v0b	0.0334726	-0.307416	0.803	0.746	1	0.208657	-0.330651	0.916	0.774	1	0.0197225	-0.321319	0.861	0.768	1	0.344292	-0.318787	0.84	0.712	1	0.471924	-0.269591	0.859	0.692	1	0.00863634	-0.442827	0.924	0.786	1	0.0350501	-0.300682	0.882	0.765	1	0.252855	-0.267037	0.862	0.799	1	0.471924	0.067038
Cartpt	0.0146155	-0.614372	0.07	0.138	1	0.00113033	-0.833429	0.036	0.169	1	0.00815432	-0.465456	0.07	0.142	1	0.167728	-0.425471	0.088	0.124	1	0.0148532	-0.494256	0.065	0.121	1	0.0382884	-0.474638	0.076	0.142	1	0.010639	-0.50161	0.088	0.154	1	0.281197	-0.305536	0.2	0.135	1	0.281197	0.00900696
Mef2c	0.00337895	-0.509117	0.169	0.258	1	0.203425	-0.340461	0.217	0.259	1	0.0623153	-0.365454	0.171	0.211	1	0.0157653	-0.446592	0.16	0.233	1	0.0394255	-0.448593	0.171	0.217	1	0.000334049	-0.49804	0.095	0.236	1	0.0190599	-0.385566	0.182	0.237	1	0.168988	-0.383972	0.185	0.239	1	0.203425	0.00266927
Htr2c	5.99396e-07	-0.630972	0.113	0.305	0.0121947	0.00245181	-0.659044	0.169	0.298	1	8.43193e-05	-0.609966	0.209	0.321	1	0.0282051	-0.573589	0.264	0.309	1	4.00576e-09	-0.916353	0.153	0.34	8.14971e-05	0.00137744	-0.498179	0.181	0.305	1	0.00196466	-0.520272	0.265	0.341	1	0.31025	-0.38386	0.308	0.333	1	0.31025	3.20461e-08
Kcnip4	1.42943e-05	-0.398371	0.092	0.244	0.290818	0.00615594	-0.404271	0.169	0.28	1	1.15271e-05	-0.430001	0.19	0.317	0.234518	0.000289096	-0.445545	0.176	0.302	1	0.00292886	-0.379739	0.2	0.272	1	1.88464e-06	-0.500086	0.143	0.338	0.0383429	1.47085e-05	-0.39324	0.188	0.321	0.299245	0.0148942	-0.378337	0.231	0.333	1	0.0148942	1.5077e-05
Scn9a	0.00301116	-0.405566	0.296	0.385	1	0.012211	-0.545186	0.482	0.484	1	0.000722972	-0.426578	0.367	0.428	1	0.239632	-0.367093	0.432	0.397	1	0.0232115	-0.456928	0.376	0.384	1	0.00038709	-0.533931	0.343	0.448	1	1.68185e-05	-0.494874	0.341	0.435	0.342173	0.300321	-0.396812	0.4	0.386	1	0.300321	0.00013454
Vstm2l	0.348738	-0.369842	0.415	0.387	1	0.000232625	-0.654266	0.217	0.364	1	8.6188e-05	-0.507265	0.329	0.409	1	0.00240439	-0.547952	0.304	0.37	1	0.0563314	-0.472922	0.341	0.345	1	2.55405e-05	-0.543146	0.257	0.407	0.519622	2.27091e-06	-0.573361	0.265	0.386	0.0462017	0.152332	-0.424738	0.477	0.476	1	0.348738	1.81671e-05
Mpped2	3.67928e-06	-0.419798	0.127	0.304	0.0748549	0.000462465	-0.453548	0.157	0.326	1	1.48965e-05	-0.424434	0.146	0.283	0.30307	1.81429e-08	-0.588402	0.088	0.31	0.000369118	0.000148807	-0.428949	0.182	0.293	1	1.36536e-06	-0.546858	0.105	0.308	0.0277782	5.9462e-11	-0.498442	0.071	0.298	1.20975e-06	0.00131912	-0.441589	0.169	0.344	1	0.00131912	4.75696e-10
Tmem243	0.183828	-0.461304	0.338	0.347	1	0.00793674	-0.692144	0.373	0.417	1	0.0499088	-0.462682	0.348	0.348	1	0.00220973	-0.729657	0.384	0.429	1	0.0105676	-0.667309	0.365	0.382	1	0.0347922	-0.547598	0.305	0.337	1	0.000113109	-0.579073	0.318	0.393	1	0.0412104	-0.481794	0.2	0.289	1	0.183828	0.000904511
Syt1	0.00647821	-0.393993	0.845	0.748	1	0.0138584	-0.528893	0.855	0.735	1	0.0535326	-0.353956	0.886	0.764	1	1.94283e-05	-0.681431	0.88	0.751	0.395268	0.0844976	-0.375278	0.924	0.758	1	5.75916e-05	-0.61482	0.829	0.761	1	1.08846e-08	-0.659106	0.8	0.775	0.000221446	2.50325e-05	-0.778583	0.754	0.796	0.509286	0.0844976	8.70764e-08
Igf2bp3	0.655434	-0.303099	0.732	0.61	1	0.0174793	-0.474609	0.843	0.725	1	0.0176499	-0.384789	0.842	0.693	1	0.0127662	-0.432195	0.76	0.685	1	0.334773	-0.362502	0.765	0.632	1	0.000911078	-0.624883	0.752	0.7	1	0.000482931	-0.417598	0.729	0.694	1	0.875903	-0.27013	0.662	0.563	1	0.875903	0.00385692
Ube3a	0.00515427	-0.346265	0.979	0.968	1	2.18075e-06	-0.583545	1	0.983	0.0443674	1.04532e-05	-0.449398	1	0.98	0.21267	4.3807e-06	-0.441425	0.992	0.985	0.0891254	1.06459e-10	-0.507168	1	0.977	2.16591e-06	3.43837e-09	-0.674123	1	0.982	6.99535e-05	4.24653e-11	-0.490354	0.994	0.989	8.63956e-07	0.124807	-0.277645	1	0.982	1	0.124807	3.39722e-10
Six3	2.2676e-08	-0.731705	0.035	0.232	0.000461343	0.000112098	-0.589414	0.036	0.203	1	9.80654e-09	-0.595872	0.013	0.193	0.000199514	1.12635e-05	-0.603832	0.04	0.19	0.229155	1.70277e-07	-0.537478	0.018	0.168	0.00346428	2.27112e-07	-0.679226	0.029	0.247	0.0046206	8.12383e-08	-0.563062	0.053	0.215	0.00165279	0.00541676	-0.516869	0.092	0.226	1	0.00541676	7.84523e-08
Acp1	0.614571	-0.383683	0.831	0.716	1	7.09363e-06	-0.800022	0.843	0.8	0.14432	0.00497533	-0.500097	0.88	0.782	1	0.660748	-0.376482	0.936	0.799	1	0.125482	-0.470344	0.888	0.755	1	0.00587252	-0.689648	0.895	0.787	1	0.00280378	-0.452901	0.894	0.796	1	0.591216	-0.260552	0.969	0.718	1	0.660748	5.67476e-05
Rbm4b	0.439275	-0.327619	0.648	0.577	1	0.000122647	-0.701411	0.783	0.743	1	0.00706581	-0.467516	0.835	0.706	1	0.0377347	-0.465331	0.824	0.699	1	0.0115882	-0.495162	0.753	0.667	1	3.09486e-05	-0.70631	0.733	0.705	0.62965	8.9439e-05	-0.537057	0.794	0.732	1	0.399783	-0.301877	0.815	0.722	1	0.439275	0.000247562
Pcsk2	1.46862e-05	-0.655508	0.43	0.515	0.29879	1.96762e-05	-0.81203	0.41	0.525	0.400313	5.95811e-05	-0.608741	0.424	0.476	1	9.47036e-05	-0.657475	0.36	0.463	1	0.00501277	-0.505403	0.471	0.498	1	7.56122e-07	-0.768683	0.333	0.477	0.0153833	3.27818e-14	-0.868438	0.253	0.489	6.66946e-10	0.000136725	-0.754402	0.262	0.441	1	0.00501277	2.62254e-13
Malat1	2.49928e-28	-0.73586	1	1	5.08478e-24	2.54963e-23	-0.840988	1	0.999	5.18722e-19	1.80048e-36	-0.712614	1	1	3.66308e-32	6.26271e-31	-0.697324	1	1	1.27415e-26	1.83691e-46	-0.78216	1	0.999	3.73719e-42	6.35184e-30	-0.787978	1	0.998	1.29228e-25	4.18388e-39	-0.655412	1	1	8.5121e-35	4.76374e-11	-0.527005	1	1	9.69183e-07	4.76374e-11	1.46952e-45
Zic1	2.27536e-11	-0.89056	0.085	0.343	4.62923e-07	5.74553e-06	-0.79736	0.072	0.284	0.116893	8.71353e-07	-0.638881	0.12	0.279	0.0177277	1.67871e-07	-0.756185	0.088	0.288	0.00341533	2.16848e-10	-0.745435	0.071	0.285	4.41178e-06	6.91358e-08	-0.796175	0.152	0.386	0.00140657	6.02257e-11	-0.76923	0.118	0.337	1.22529e-06	1.81373e-05	-0.838742	0.154	0.379	0.369004	1.81373e-05	1.82029e-10
Cacna2d1	8.23304e-07	-0.797438	0.134	0.305	0.0167501	2.48399e-05	-0.977918	0.301	0.439	0.505368	2.21921e-06	-0.720912	0.266	0.389	0.0451499	2.32584e-07	-0.919246	0.192	0.379	0.00473193	1.20133e-06	-0.845562	0.259	0.389	0.024441	4.39125e-07	-0.8369	0.19	0.388	0.008934	7.06046e-12	-0.963207	0.229	0.431	1.43645e-07	0.000145535	-0.939961	0.246	0.418	1	0.000145535	5.64837e-11
Slc17a6	1.06524e-08	-0.80559	0.021	0.222	0.000216723	3.06561e-06	-0.788016	0.072	0.305	0.0623699	1.4271e-10	-0.831017	0.063	0.289	2.90344e-06	2.32945e-08	-0.862279	0.064	0.285	0.000473927	3.17481e-12	-0.877047	0.041	0.286	6.45915e-08	1.74041e-09	-0.859572	0.029	0.3	3.54086e-05	5.68266e-12	-0.914463	0.118	0.355	1.15614e-07	0.0146145	-0.601759	0.246	0.356	1	0.0146145	2.53985e-11
Gm26699	0.0229609	-0.500389	0.183	0.248	1	0.000194084	-0.848803	0.614	0.624	1	0.000664814	-0.57991	0.411	0.454	1	0.0101515	-0.692824	0.592	0.553	1	0.00105317	-0.747632	0.5	0.494	1	2.69915e-05	-0.872816	0.39	0.491	0.549142	8.29488e-06	-0.702563	0.424	0.496	0.168759	0.155811	-0.51357	0.308	0.344	1	0.155811	6.63571e-05
Fam19a1	0.00029617	-0.493732	0.092	0.21	1	0.00256823	-0.596061	0.12	0.253	1	7.28808e-07	-0.620597	0.07	0.229	0.0148276	4.46128e-07	-0.734114	0.048	0.236	0.00907648	8.36773e-07	-0.664572	0.071	0.224	0.0170241	2.80798e-07	-0.905641	0.057	0.278	0.00571284	1.77318e-10	-0.757981	0.059	0.272	3.60753e-06	0.00040395	-0.717315	0.123	0.3	1	0.00256823	1.41854e-09
Rsrp1	0.00820547	-0.340444	0.803	0.739	1	5.36259e-10	-0.774202	0.964	0.907	1.09102e-05	3.0354e-08	-0.528914	0.937	0.923	0.000617552	2.45801e-05	-0.500425	0.88	0.871	0.500083	0.00929106	-0.339507	0.982	0.867	1	1.61817e-15	-0.945682	0.933	0.937	3.29216e-11	1.80622e-14	-0.656886	0.941	0.892	3.67476e-10	8.82875e-05	-0.471187	0.862	0.877	1	0.00929106	1.29453e-14

## Sheet: Vgat3
	P23F_p_val	P23F_avg_logFC	P23F_pct.1	P23F_pct.2	P23F_p_val_adj	AF_p_val	AF_avg_logFC	AF_pct.1	AF_pct.2	AF_p_val_adj	P35F_p_val	P35F_avg_logFC	P35F_pct.1	P35F_pct.2	P35F_p_val_adj	Cast_p_val	Cast_avg_logFC	Cast_pct.1	Cast_pct.2	Cast_p_val_adj	OVX_p_val	OVX_avg_logFC	OVX_pct.1	OVX_pct.2	OVX_p_val_adj	AM_p_val	AM_avg_logFC	AM_pct.1	AM_pct.2	AM_p_val_adj	P35M_p_val	P35M_avg_logFC	P35M_pct.1	P35M_pct.2	P35M_p_val_adj	P23M_p_val	P23M_avg_logFC	P23M_pct.1	P23M_pct.2	P23M_p_val_adj	max_pval	minimump_p_val
Gabra1	7.63927e-12	0.892287	0.759	0.507	1.55421e-07	2.51175e-09	0.819385	0.632	0.508	5.11016e-05	5.66927e-11	0.926877	0.716	0.557	1.15341e-06	8.4202e-12	0.801185	0.658	0.564	1.71309e-07	7.44828e-13	0.725812	0.676	0.559	1.51535e-08	1.52932e-19	0.938751	0.773	0.549	3.11139e-15	2.74145e-14	0.793558	0.752	0.596	5.57748e-10	1.1572e-45	1.02266	0.831	0.597	2.35433e-41	2.51175e-09	9.25761e-45
mt-Nd1	3.60185e-21	0.725732	1	0.998	7.32796e-17	1.88267e-25	0.550423	1	0.991	3.8303e-21	2.97697e-29	0.744494	1	0.994	6.05664e-25	1.82112e-38	0.689451	1	0.996	3.70506e-34	5.40774e-51	0.657205	1	0.997	1.10021e-46	1.86415e-36	0.711483	1	0.985	3.79261e-32	5.29599e-39	0.720567	1	0.996	1.07747e-34	4.16289e-18	0.517016	0.995	0.998	8.46941e-14	4.16289e-18	4.32619e-50
mt-Co2	7.32722e-25	0.828031	1	0.998	1.49072e-20	4.16119e-24	0.511959	1	0.991	8.46594e-20	7.64026e-27	0.67511	1	0.991	1.55441e-22	2.22697e-42	0.704838	1	0.99	4.53077e-38	2.49222e-51	0.648898	1	0.995	5.07042e-47	2.56413e-34	0.710287	1	0.98	5.21672e-30	1.09231e-40	0.746427	1	0.993	2.2223e-36	1.71717e-14	0.465794	0.991	0.993	3.49359e-10	1.71717e-14	1.99377e-50
mt-Atp6	2.03844e-22	0.797204	1	1	4.14721e-18	3.2603e-24	0.536162	1	0.998	6.63307e-20	3.23451e-29	0.747466	1	0.997	6.58061e-25	1.60116e-40	0.691847	1	0.998	3.25757e-36	4.40606e-48	0.658465	1	0.998	8.96414e-44	1.93535e-39	0.702934	1	0.991	3.93748e-35	1.23335e-39	0.780771	1	0.998	2.50924e-35	1.25808e-22	0.513551	1	0.999	2.55957e-18	2.03844e-22	3.52485e-47
mt-Co3	6.97196e-25	0.84864	1	1	1.41844e-20	6.17757e-29	0.570732	1	0.995	1.25683e-24	1.7028e-26	0.67326	1	0.996	3.46434e-22	6.61517e-46	0.725907	1	0.997	1.34586e-41	7.64491e-52	0.663546	1	0.998	1.55536e-47	1.61299e-37	0.701574	1	0.989	3.28163e-33	6.75122e-40	0.744984	1	0.998	1.37354e-35	1.17837e-34	0.57788	1	1	2.39739e-30	6.97196e-25	6.11593e-51
Grm5	8.41211e-05	0.729423	0.586	0.476	1	3.84964e-20	0.903112	0.746	0.486	7.83209e-16	2.14015e-11	0.75884	0.704	0.515	4.35413e-07	1.39256e-09	0.730972	0.617	0.55	2.83316e-05	1.04454e-11	0.734511	0.63	0.501	2.12511e-07	3.14403e-08	0.685503	0.618	0.501	0.000639654	1.70702e-11	0.680057	0.686	0.532	3.47294e-07	2.11386e-33	0.819129	0.793	0.566	4.30065e-29	8.41211e-05	1.69109e-32
Gpm6a	1.21097e-27	1.05366	1	0.941	2.46371e-23	3.04181e-30	0.726664	0.982	0.93	6.18856e-26	5.94246e-30	0.789964	1	0.95	1.20899e-25	1.73411e-41	0.790188	0.98	0.945	3.52804e-37	6.67889e-41	0.736063	0.977	0.938	1.35882e-36	1.42338e-23	0.682011	0.945	0.905	2.89586e-19	1.79206e-31	0.758212	1	0.954	3.64595e-27	1.20859e-69	0.820741	1	0.968	2.45887e-65	1.42338e-23	9.66871e-69
mt-Nd4	2.39928e-22	0.761264	1	0.996	4.88134e-18	8.03358e-20	0.461241	1	0.989	1.63443e-15	7.30874e-25	0.639124	1	0.989	1.48696e-20	1.83484e-39	0.625665	1	0.992	3.73298e-35	1.45639e-45	0.631182	1	0.993	2.96303e-41	7.11109e-33	0.667766	0.991	0.972	1.44675e-28	2.60278e-37	0.692454	1	0.993	5.29536e-33	3.6651e-15	0.471044	0.995	0.99	7.45665e-11	3.6651e-15	1.16511e-44
mt-Nd4l	6.36589e-09	0.711528	0.776	0.72	0.000129514	0.108762	0.279327	0.544	0.671	1	2.0239e-12	0.730912	0.79	0.765	4.11763e-08	1.47589e-08	0.717214	0.611	0.58	0.00030027	2.20722e-13	0.585616	0.723	0.669	4.4906e-09	5.78558e-13	0.659242	0.755	0.718	1.17708e-08	1.3337e-26	0.761853	0.924	0.758	2.71342e-22	6.65851e-06	0.499175	0.648	0.728	0.135467	0.108762	1.06696e-25
Ecel1	0.00129627	0.680623	0.397	0.258	1	0.175244	0.339593	0.281	0.262	1	0.0818555	0.33405	0.346	0.303	1	0.310615	0.420837	0.255	0.252	1	2.1105e-05	0.657383	0.318	0.219	0.429382	2.50197e-06	0.658086	0.473	0.317	0.0509025	0.00552327	0.429039	0.381	0.309	1	2.80023e-07	0.471927	0.413	0.299	0.00569706	0.310615	2.24018e-06
Slc12a5	2.96606e-11	0.811542	0.845	0.722	6.03445e-07	1.74498e-23	0.880174	0.868	0.742	3.55017e-19	3.82793e-08	0.556069	0.802	0.78	0.000778792	1.46423e-18	0.692966	0.792	0.77	2.97897e-14	6.4461e-26	0.637217	0.861	0.748	1.31146e-21	7.13092e-17	0.653221	0.855	0.772	1.45078e-12	8.09346e-18	0.599363	0.905	0.807	1.64661e-13	1.57796e-32	0.601405	0.892	0.784	3.21036e-28	3.82793e-08	1.26237e-31
Aplp2	1.73763e-08	0.700668	0.759	0.694	0.000353521	8.70987e-09	0.668646	0.711	0.692	0.000177202	2.26712e-19	0.788389	0.901	0.744	4.61245e-15	3.06911e-08	0.502831	0.685	0.708	0.00062441	7.13121e-18	0.650324	0.763	0.67	1.45084e-13	1.40355e-11	0.649882	0.755	0.731	2.85552e-07	3.62463e-15	0.565945	0.876	0.758	7.37432e-11	4.335e-36	0.644088	0.901	0.81	8.81955e-32	3.06911e-08	3.468e-35
mt-Nd3	1.52787e-06	0.446956	0.879	0.855	0.0310845	2.38989e-16	0.492987	0.93	0.938	4.86223e-12	1.27667e-19	0.626231	0.963	0.947	2.59739e-15	1.48208e-19	0.575464	0.879	0.897	3.0153e-15	6.79874e-23	0.544765	0.908	0.897	1.3832e-18	3.64479e-22	0.647851	0.945	0.901	7.41532e-18	2.19817e-25	0.610229	0.981	0.942	4.47217e-21	1.73861e-14	0.462365	0.854	0.877	3.53719e-10	1.52787e-06	1.75853e-24
Sez6l	0.000506696	0.508944	0.603	0.535	1	0.60971	0.256631	0.482	0.591	1	0.00015784	0.423733	0.654	0.64	1	0.432522	0.35074	0.423	0.538	1	0.00908571	0.397353	0.491	0.518	1	2.51723e-11	0.635243	0.718	0.582	5.12131e-07	6.43248e-05	0.405424	0.676	0.628	1	6.79513e-16	0.568374	0.657	0.539	1.38247e-11	0.60971	5.4361e-15
Slc32a1	5.81761e-05	0.638844	0.621	0.49	1	6.7199e-13	0.744327	0.632	0.432	1.36716e-08	4.33172e-09	0.575332	0.704	0.511	8.81289e-05	6.05194e-16	0.757035	0.638	0.453	1.23127e-11	6.88837e-18	0.750749	0.642	0.435	1.40144e-13	2.22027e-09	0.632372	0.609	0.451	4.51713e-05	3.13688e-17	0.695239	0.762	0.467	6.38198e-13	2.199e-45	0.896321	0.845	0.522	4.47387e-41	5.81761e-05	1.7592e-44
Slc6a1	0.0268429	0.428795	0.603	0.619	1	0.0212784	0.287459	0.588	0.62	1	0.0233105	0.289426	0.642	0.656	1	0.296219	0.253597	0.477	0.581	1	0.000269307	0.358939	0.578	0.58	1	3.49952e-10	0.629771	0.7	0.577	7.11978e-06	1.17516e-07	0.50655	0.695	0.622	0.00239087	1.94184e-16	0.56314	0.765	0.668	3.95068e-12	0.296219	1.55347e-15
mt-Cytb	1.82888e-20	0.638275	1	0.998	3.72085e-16	9.61952e-22	0.466024	1	0.988	1.95709e-17	2.76589e-25	0.585947	1	0.99	5.62721e-21	2.55582e-42	0.635897	1	0.989	5.19981e-38	2.3359e-47	0.586141	1	0.995	4.7524e-43	5.29468e-29	0.607922	1	0.974	1.0772e-24	1.34281e-40	0.680909	1	0.994	2.73194e-36	3.93259e-18	0.482542	0.995	0.997	8.00086e-14	3.93259e-18	1.86872e-46
Tmx2	1.62208e-06	0.732936	0.69	0.633	0.0330012	1.62127e-10	0.593076	0.711	0.669	3.29847e-06	1.10193e-09	0.625076	0.741	0.706	2.24188e-05	1.00814e-08	0.609056	0.624	0.622	0.000205106	6.90971e-11	0.514223	0.665	0.623	1.40578e-06	1.39967e-11	0.603641	0.745	0.686	2.84762e-07	7.4445e-21	0.719631	0.867	0.708	1.51458e-16	6.62705e-33	0.661261	0.836	0.71	1.34827e-28	1.62208e-06	5.30164e-32
Atp8a1	8.99874e-07	0.667196	0.707	0.62	0.0183079	7.63223e-10	0.60338	0.728	0.677	1.55278e-05	6.19481e-14	0.651086	0.84	0.687	1.26033e-09	5.48197e-09	0.593916	0.651	0.638	0.000111531	6.11184e-08	0.396397	0.665	0.634	0.00124345	7.20831e-11	0.597765	0.718	0.663	1.46653e-06	6.28187e-09	0.553957	0.733	0.692	0.000127805	8.60287e-10	0.436017	0.671	0.66	1.75025e-05	8.99874e-07	4.95585e-13
mt-Co1	1.01631e-23	0.7874	1	0.999	2.06769e-19	2.57457e-23	0.479622	1	0.994	5.23796e-19	3.4852e-29	0.63349	1	0.991	7.09064e-25	9.51508e-44	0.605405	1	0.997	1.93584e-39	1.49957e-51	0.597066	1	0.997	3.05087e-47	5.00211e-32	0.592441	1	0.982	1.01768e-27	2.23099e-41	0.69202	1	0.996	4.53895e-37	2.67817e-25	0.488201	1	1	5.44874e-21	2.57457e-23	1.19965e-50
Atp1b1	5.78579e-13	0.663127	0.983	0.946	1.17712e-08	1.26311e-24	0.636224	0.982	0.936	2.5698e-20	3.15793e-23	0.671329	1	0.953	6.42481e-19	5.93577e-27	0.61191	0.966	0.938	1.20763e-22	1.02027e-34	0.660624	0.965	0.938	2.07574e-30	1.01941e-16	0.588265	0.945	0.923	2.07398e-12	1.73109e-28	0.673587	1	0.961	3.5219e-24	1.00755e-51	0.66194	0.981	0.971	2.04986e-47	5.78579e-13	8.06041e-51
Atp2b2	0.0334752	0.517179	0.466	0.447	1	0.225634	0.390805	0.421	0.492	1	0.00104562	0.463329	0.556	0.529	1	0.172654	0.37894	0.403	0.465	1	0.109666	0.331954	0.439	0.485	1	2.97022e-07	0.584154	0.6	0.515	0.0060429	3.40106e-08	0.517644	0.648	0.533	0.000691945	3.0277e-12	0.580747	0.624	0.563	6.15985e-08	0.225634	2.42216e-11
Nts	0.0628571	0.874507	0.19	0.122	1	7.41083e-05	0.878918	0.289	0.171	1	0.000943171	0.864859	0.272	0.163	1	9.48909e-07	1.08006	0.228	0.113	0.0193056	1.02971e-06	0.93976	0.202	0.1	0.0209495	0.0854857	0.577597	0.182	0.138	1	0.0237089	0.519245	0.238	0.165	1	9.98354e-20	1.21518	0.3	0.113	2.03115e-15	0.0854857	7.98683e-19
Dpp10	0.000100175	0.847568	0.483	0.345	1	2.82631e-05	0.558624	0.447	0.338	0.575014	4.75828e-05	0.556789	0.543	0.439	0.968071	3.38051e-08	0.755838	0.477	0.35	0.000687766	6.78543e-08	0.605118	0.497	0.394	0.0013805	1.58039e-05	0.575972	0.436	0.316	0.321531	1.06873e-08	0.787104	0.524	0.363	0.000217434	6.99491e-13	0.685831	0.526	0.387	1.42311e-08	0.000100175	5.59593e-12
Clstn1	5.97827e-14	0.753423	0.897	0.793	1.21628e-09	7.81184e-14	0.581415	0.868	0.832	1.58932e-09	2.96548e-13	0.587527	0.901	0.845	6.03327e-09	1.0834e-11	0.499447	0.779	0.815	2.20418e-07	7.66721e-12	0.410653	0.821	0.822	1.55989e-07	1.43933e-12	0.574052	0.845	0.821	2.92833e-08	3.49861e-18	0.582485	0.914	0.855	7.11793e-14	4.01041e-26	0.521902	0.883	0.849	8.15918e-22	1.0834e-11	3.20833e-25
Syt1	8.9865e-05	0.473731	0.845	0.752	1	2.10933e-08	0.544355	0.807	0.736	0.000429144	0.00178185	0.338811	0.765	0.771	1	1.62133e-05	0.386023	0.758	0.756	0.32986	3.18411e-09	0.37236	0.815	0.764	6.47807e-05	1.09753e-08	0.571407	0.791	0.762	0.000223292	6.40741e-06	0.441897	0.819	0.774	0.130359	9.18841e-19	0.541894	0.864	0.791	1.86938e-14	0.00178185	7.35073e-18
Gria3	0.283004	0.459079	0.31	0.306	1	0.617926	0.322327	0.281	0.314	1	0.00960371	0.441973	0.395	0.326	1	0.00951089	0.510681	0.356	0.332	1	0.00180427	0.561747	0.335	0.286	1	0.000698766	0.57067	0.4	0.318	1	0.000371581	0.535115	0.429	0.347	1	7.26682e-11	0.603954	0.437	0.296	1.47843e-06	0.617926	5.81345e-10
Glrb	8.11275e-17	1.09327	0.81	0.514	1.65054e-12	8.20132e-06	0.522163	0.561	0.498	0.166856	1.21414e-13	0.765576	0.741	0.549	2.47018e-09	6.27775e-09	0.718273	0.557	0.485	0.000127721	9.16202e-12	0.586696	0.613	0.503	1.86401e-07	3.23892e-06	0.563693	0.555	0.503	0.0658958	7.02141e-19	0.859052	0.762	0.563	1.42851e-14	2.0379e-32	0.777215	0.789	0.62	4.1461e-28	8.20132e-06	1.63032e-31
Sv2a	6.1838e-14	0.742743	0.931	0.866	1.25809e-09	3.76278e-09	0.430526	0.833	0.855	7.65537e-05	4.2197e-15	0.563812	0.975	0.899	8.58497e-11	4.1622e-15	0.485477	0.859	0.861	8.46799e-11	3.56155e-18	0.557589	0.85	0.844	7.24597e-14	1.51178e-15	0.552239	0.9	0.871	3.07571e-11	2.47223e-15	0.542535	0.933	0.897	5.02976e-11	1.84e-33	0.548939	0.958	0.884	3.74347e-29	3.76278e-09	1.472e-32
Scn2b	4.04298e-05	0.627493	0.638	0.519	0.822543	1.47517e-13	0.797097	0.754	0.622	3.00124e-09	5.43091e-13	0.822508	0.778	0.629	1.10492e-08	4.39646e-08	0.617908	0.604	0.574	0.000894461	2.85733e-11	0.636828	0.671	0.606	5.81325e-07	6.50979e-06	0.547823	0.709	0.721	0.132442	3.54163e-12	0.741667	0.762	0.675	7.20544e-08	5.23411e-13	0.448658	0.779	0.755	1.06488e-08	4.04298e-05	1.18014e-12
Grin2a	0.73441	0.254483	0.103	0.13	1	0.143327	0.304833	0.202	0.17	1	2.47582e-05	0.48945	0.296	0.153	0.503705	0.338705	0.305766	0.181	0.172	1	0.00172629	0.409496	0.214	0.145	1	0.000368669	0.545009	0.309	0.21	1	9.83527e-07	0.507744	0.324	0.171	0.0200099	0.00949045	0.374052	0.202	0.156	1	0.73441	7.86819e-06
Gdpd1	0.325309	0.43669	0.31	0.314	1	0.703434	0.259932	0.281	0.322	1	0.262395	0.252797	0.321	0.331	1	0.962787	0.272772	0.242	0.291	1	0.0253527	0.454163	0.306	0.282	1	0.000287325	0.542316	0.391	0.311	1	0.00542607	0.374036	0.4	0.353	1	0.000315091	0.394828	0.38	0.334	1	0.962787	0.00229629
Alcam	1.24088e-10	0.989045	0.776	0.551	2.52457e-06	1.16576e-07	0.859765	0.596	0.498	0.00237175	3.04182e-08	0.74049	0.716	0.568	0.000618859	2.84249e-06	0.689228	0.57	0.526	0.0578305	3.62299e-12	0.688755	0.671	0.562	7.37096e-08	6.34351e-06	0.538987	0.609	0.533	0.129059	8.74208e-05	0.576452	0.629	0.568	1	3.34889e-19	0.913287	0.7	0.598	6.81331e-15	8.74208e-05	2.67911e-18
Reep5	4.15287e-06	0.680914	0.741	0.754	0.0844901	5.34234e-08	0.46936	0.763	0.801	0.0010869	1.09214e-09	0.464293	0.864	0.834	2.22195e-05	4.48806e-09	0.482565	0.711	0.756	9.13096e-05	3.73864e-18	0.55463	0.821	0.774	7.60627e-14	1.35562e-10	0.531046	0.782	0.8	2.75801e-06	1.29834e-10	0.454585	0.905	0.84	2.64147e-06	8.88269e-31	0.592391	0.901	0.816	1.80718e-26	4.15287e-06	7.10615e-30
mt-Nd2	3.6942e-16	0.629731	1	0.986	7.51585e-12	1.17506e-17	0.430563	0.982	0.98	2.39066e-13	9.37443e-22	0.57222	1	0.983	1.90723e-17	1.11871e-27	0.5758	0.987	0.981	2.27601e-23	3.30179e-41	0.560811	0.988	0.988	6.7175e-37	6.43957e-24	0.529595	1	0.955	1.31013e-19	2.59023e-34	0.606545	1	0.984	5.26982e-30	7.96492e-05	0.265554	0.93	0.959	1	7.96492e-05	2.64143e-40
Canx	4.19766e-13	0.70369	0.897	0.874	8.54014e-09	3.48797e-15	0.492207	0.895	0.873	7.09628e-11	7.36181e-15	0.565525	0.938	0.894	1.49776e-10	2.459e-23	0.613438	0.886	0.877	5.00283e-19	4.83039e-27	0.613918	0.908	0.864	9.82742e-23	2.81966e-11	0.528459	0.855	0.86	5.7366e-07	2.19595e-25	0.716841	0.943	0.918	4.46765e-21	3.19775e-53	0.675637	0.981	0.921	6.50583e-49	2.81966e-11	2.5582e-52
Slc7a14	0.606972	0.441419	0.345	0.405	1	0.0503583	0.50804	0.421	0.456	1	0.0304757	0.396144	0.494	0.519	1	0.230404	0.396764	0.389	0.456	1	0.211467	0.399069	0.399	0.448	1	0.00489559	0.523803	0.491	0.49	1	5.46863e-05	0.444662	0.581	0.527	1	7.86576e-06	0.492057	0.507	0.497	0.160029	0.606972	6.29244e-05
Cadm3	1.41998e-05	0.656029	0.621	0.498	0.288895	0.00161039	0.368525	0.518	0.503	1	1.4548e-06	0.561218	0.654	0.595	0.0295979	0.0019167	0.45231	0.477	0.502	1	3.72048e-06	0.496233	0.538	0.518	0.0756932	7.11816e-07	0.522811	0.618	0.573	0.0144819	4.96751e-05	0.400751	0.61	0.574	1	1.07347e-05	0.381834	0.573	0.581	0.218397	0.0019167	5.69451e-06
Sez6	0.0425184	0.593001	0.276	0.211	1	0.506676	0.298332	0.219	0.225	1	0.108405	0.324192	0.272	0.237	1	0.660388	0.384057	0.195	0.209	1	0.249206	0.304335	0.22	0.208	1	5.75113e-06	0.52142	0.345	0.209	0.117007	0.0463937	0.364501	0.276	0.233	1	1.54328e-09	0.591992	0.366	0.236	3.1398e-05	0.660388	1.23462e-08
Pigk	0.0591303	0.568955	0.362	0.326	1	0.65245	0.26218	0.325	0.383	1	0.0623246	0.385113	0.383	0.371	1	0.938737	0.270724	0.255	0.318	1	0.13746	0.316972	0.335	0.34	1	0.000861304	0.516906	0.436	0.398	1	0.00181408	0.37896	0.448	0.392	1	0.000273456	0.401675	0.39	0.355	1	0.938737	0.00218556
Clcn3	0.00070035	0.579294	0.621	0.591	1	3.4088e-07	0.57688	0.667	0.678	0.0069352	1.2513e-08	0.601124	0.753	0.675	0.000254577	2.0044e-08	0.519748	0.658	0.672	0.000407795	6.47763e-07	0.40069	0.647	0.656	0.0131787	7.23233e-08	0.516405	0.709	0.67	0.00147142	3.14178e-12	0.571122	0.781	0.725	6.39196e-08	1.21406e-13	0.537906	0.7	0.676	2.47001e-09	0.00070035	9.7125e-13
Spock1	1.54922e-09	0.67006	0.793	0.538	3.15189e-05	0.000849645	0.507608	0.57	0.538	1	2.74293e-09	0.673141	0.741	0.574	5.58049e-05	4.74682e-11	0.708374	0.604	0.478	9.6574e-07	7.76902e-06	0.394905	0.584	0.528	0.158061	1.46695e-05	0.515428	0.591	0.535	0.298451	3.9157e-09	0.576583	0.695	0.564	7.9665e-05	4.41442e-22	0.673082	0.737	0.611	8.98113e-18	0.000849645	3.53153e-21
Faim2	4.79547e-12	0.705926	0.914	0.799	9.75638e-08	1.85662e-11	0.537514	0.833	0.837	3.77728e-07	1.1811e-21	0.766682	0.938	0.877	2.40295e-17	5.47546e-10	0.45061	0.792	0.817	1.11398e-05	2.08098e-12	0.489029	0.815	0.794	4.23375e-08	6.56268e-13	0.511947	0.836	0.852	1.33518e-08	1.5662e-17	0.571199	0.914	0.875	3.18643e-13	9.17538e-31	0.603696	0.901	0.844	1.86673e-26	5.47546e-10	7.3403e-30
Ctsb	0.00428982	0.475287	0.603	0.614	1	0.0683892	0.279154	0.561	0.678	1	2.91192e-05	0.561748	0.667	0.722	0.592429	0.00159365	0.43374	0.577	0.659	1	0.0026621	0.32376	0.578	0.658	1	8.84304e-07	0.508026	0.682	0.698	0.0179912	1.68908e-07	0.454157	0.752	0.728	0.00343644	2.35198e-14	0.484617	0.728	0.693	4.78509e-10	0.0683892	1.88158e-13
Npdc1	0.000891714	0.638212	0.586	0.556	1	0.0388592	0.332936	0.535	0.616	1	0.014473	0.284175	0.593	0.624	1	0.0884641	0.379658	0.45	0.528	1	0.928984	0.264099	0.405	0.529	1	3.93619e-06	0.507289	0.627	0.605	0.0800818	6.74101e-05	0.349181	0.619	0.597	1	0.000146135	0.301874	0.573	0.606	1	0.928984	3.14891e-05
Enpp5	0.0239819	0.477201	0.466	0.435	1	0.47976	0.279635	0.368	0.431	1	0.00892895	0.401216	0.481	0.475	1	0.0797364	0.391045	0.369	0.396	1	0.390018	0.264118	0.353	0.402	1	0.000107071	0.505202	0.5	0.453	1	0.00447783	0.370024	0.486	0.477	1	6.82009e-09	0.489403	0.545	0.493	0.000138755	0.47976	5.45607e-08
Adam23	3.14181e-05	0.670949	0.5	0.325	0.639202	0.000814045	0.575975	0.412	0.354	1	1.225e-07	0.801384	0.543	0.389	0.00249226	0.642674	0.366307	0.302	0.35	1	2.37078e-07	0.692754	0.451	0.357	0.00482336	4.16339e-05	0.502724	0.482	0.394	0.847042	3.81601e-12	0.69821	0.6	0.396	7.76368e-08	5.07482e-07	0.494407	0.507	0.452	0.0103247	0.642674	3.05281e-11
Sirpa	0.000134462	0.681406	0.534	0.438	1	0.052062	0.373718	0.465	0.496	1	5.76801e-08	0.628639	0.642	0.527	0.0011735	0.000314749	0.54587	0.45	0.426	1	5.62335e-06	0.470492	0.497	0.431	0.114407	3.42014e-05	0.501998	0.555	0.497	0.695827	7.61617e-07	0.535889	0.59	0.518	0.0154951	0.000769816	0.354095	0.493	0.509	1	0.052062	4.61441e-07
Disp2	7.79638e-07	0.536941	0.776	0.753	0.0158617	7.88917e-08	0.513636	0.737	0.778	0.00160505	4.67128e-13	0.628975	0.914	0.836	9.50372e-09	1.01015e-07	0.416731	0.745	0.788	0.00205515	1.89945e-09	0.445503	0.734	0.748	3.86443e-05	8.08524e-13	0.499124	0.864	0.826	1.64494e-08	4.04705e-15	0.589734	0.876	0.856	8.23372e-11	1.66409e-26	0.553387	0.901	0.831	3.38558e-22	7.79638e-07	1.33127e-25
Tnfrsf21	0.378168	0.335451	0.31	0.313	1	0.0114539	0.444619	0.386	0.348	1	0.0138562	0.455443	0.407	0.362	1	0.00959704	0.536005	0.322	0.286	1	0.00411026	0.492488	0.358	0.328	1	0.00189776	0.498984	0.409	0.355	1	0.00178245	0.474734	0.429	0.374	1	0.000131696	0.407391	0.408	0.361	1	0.378168	0.00105309
Scn1a	0.000111191	0.732929	0.431	0.271	1	2.12135e-06	0.643175	0.447	0.319	0.0431588	7.89282e-08	0.711385	0.506	0.328	0.00160579	2.57094e-05	0.584498	0.43	0.348	0.523057	7.77302e-11	0.682081	0.474	0.316	1.58142e-06	0.000503702	0.498042	0.418	0.337	1	7.13221e-05	0.56275	0.448	0.35	1	5.8224e-12	0.625888	0.516	0.386	1.18457e-07	0.000503702	4.65792e-11
Psap	1.14812e-11	0.699789	0.914	0.856	2.33584e-07	5.05437e-08	0.394252	0.833	0.859	0.00102831	1.93311e-17	0.649626	0.963	0.898	3.93291e-13	3.97601e-17	0.50884	0.859	0.864	8.08919e-13	6.75762e-19	0.538643	0.873	0.852	1.37484e-14	6.13889e-13	0.496499	0.873	0.878	1.24896e-08	3.00973e-18	0.595635	0.952	0.914	6.12331e-14	5.809e-46	0.638896	0.953	0.922	1.18184e-41	5.05437e-08	4.6472e-45
Ptprs	3.50454e-06	0.599335	0.776	0.726	0.0712998	3.91272e-07	0.422488	0.728	0.781	0.00796042	1.94845e-05	0.411464	0.753	0.808	0.396413	0.000543978	0.369483	0.631	0.745	1	3.30492e-05	0.372922	0.665	0.73	0.672386	2.19034e-08	0.494845	0.755	0.805	0.000445625	3.46757e-08	0.392123	0.8	0.793	0.000705478	3.08904e-18	0.459804	0.831	0.818	6.28466e-14	0.000543978	2.47124e-17
Tmem30a	3.52304e-09	0.689269	0.81	0.71	7.16763e-05	5.79343e-08	0.469176	0.746	0.753	0.00117867	4.63932e-08	0.549872	0.79	0.808	0.000943869	1.92728e-14	0.641292	0.752	0.755	3.92104e-10	3.13463e-13	0.501456	0.757	0.736	6.37741e-09	6.29589e-14	0.493392	0.836	0.754	1.2809e-09	5.04081e-16	0.563347	0.886	0.826	1.02555e-11	8.6846e-22	0.539226	0.812	0.76	1.76688e-17	5.79343e-08	6.94768e-21
Cisd1	0.000134645	0.67862	0.586	0.511	1	0.000943439	0.434445	0.553	0.562	1	2.601e-06	0.619512	0.63	0.555	0.0529174	3.03447e-06	0.570609	0.51	0.468	0.0617364	4.96032e-06	0.488403	0.549	0.505	0.100918	6.8818e-07	0.488044	0.655	0.593	0.014001	1.62437e-05	0.459568	0.59	0.53	0.330478	2.16755e-05	0.345288	0.526	0.509	0.440988	0.000943439	5.50543e-06
Thy1	0.0864706	0.446685	0.552	0.589	1	1.42452e-07	0.597114	0.667	0.601	0.00289818	9.42779e-10	0.727984	0.765	0.704	1.91808e-05	0.00416212	0.399956	0.537	0.584	1	1.61682e-09	0.590383	0.659	0.607	3.28942e-05	5.05419e-05	0.487984	0.645	0.644	1	2.0297e-16	0.711837	0.848	0.675	4.12943e-12	3.30225e-21	0.614153	0.789	0.68	6.71843e-17	0.0864706	2.6418e-20
Kcnc1	0.150389	0.407682	0.448	0.473	1	0.0528395	0.368985	0.474	0.53	1	0.00123953	0.503499	0.543	0.536	1	0.307726	0.399866	0.396	0.488	1	0.112959	0.357118	0.428	0.488	1	0.00646244	0.486405	0.5	0.537	1	0.000223151	0.512616	0.562	0.553	1	1.09236e-05	0.461496	0.526	0.524	0.22224	0.307726	8.73852e-05
Timp2	1.06329e-10	0.760285	0.845	0.795	2.16326e-06	1.39823e-13	0.521872	0.86	0.826	2.8447e-09	4.13613e-21	0.714036	0.988	0.866	8.41495e-17	1.71595e-11	0.48076	0.832	0.85	3.49109e-07	6.96493e-11	0.396662	0.838	0.834	1.41702e-06	8.17867e-13	0.485148	0.9	0.856	1.66395e-08	1.65552e-19	0.570312	0.962	0.869	3.36816e-15	1.66091e-27	0.588317	0.887	0.836	3.37911e-23	1.06329e-10	1.32873e-26
Slc4a10	0.00398466	0.68128	0.5	0.459	1	0.000969282	0.439823	0.482	0.456	1	1.40818e-05	0.718362	0.556	0.475	0.286495	0.000486752	0.578194	0.456	0.439	1	6.32303e-06	0.525236	0.509	0.46	0.128642	0.00053685	0.48302	0.464	0.424	1	1.44943e-08	0.678118	0.6	0.48	0.000294887	6.98235e-18	0.676557	0.643	0.504	1.42056e-13	0.00398466	5.58588e-17
Gabrg2	1.30482e-10	0.816352	0.707	0.477	2.65466e-06	5.46988e-20	0.841882	0.772	0.568	1.11285e-15	3.82e-15	0.864807	0.778	0.598	7.7718e-11	1.64764e-09	0.658145	0.624	0.587	3.35213e-05	7.75108e-23	0.722464	0.746	0.57	1.57696e-18	0.000345665	0.479342	0.573	0.567	1	3.25108e-14	0.66003	0.743	0.623	6.61433e-10	4.5979e-28	0.771281	0.742	0.582	9.35442e-24	0.000345665	3.67832e-27
mt-Nd5	3.42873e-09	0.679601	0.879	0.844	6.97575e-05	2.56772e-12	0.419843	0.86	0.854	5.22403e-08	1.16065e-11	0.544678	0.926	0.886	2.36134e-07	1.28141e-20	0.64099	0.839	0.807	2.60702e-16	5.00491e-12	0.472449	0.832	0.849	1.01825e-07	7.30731e-07	0.476682	0.755	0.827	0.0148667	2.39383e-22	0.655285	0.962	0.88	4.87024e-18	0.000329242	0.370583	0.695	0.781	1	0.000329242	1.91506e-21
Frrs1l	0.278181	0.389741	0.431	0.479	1	0.0415183	0.383614	0.535	0.629	1	6.43135e-07	0.505539	0.679	0.646	0.0130846	1.40881e-05	0.524824	0.591	0.619	0.286623	0.00693695	0.328564	0.549	0.61	1	1.58118e-06	0.476133	0.664	0.665	0.0321692	8.23197e-06	0.397691	0.686	0.673	0.167479	0.000416938	0.271701	0.545	0.563	1	0.278181	5.14507e-06
Kcnh7	0.180484	0.487899	0.224	0.185	1	0.0153866	0.425301	0.281	0.223	1	0.000245562	0.608767	0.346	0.223	1	0.280355	0.435799	0.235	0.234	1	3.71169e-06	0.531578	0.324	0.215	0.0755144	0.000329062	0.473312	0.336	0.232	1	0.000212814	0.545291	0.343	0.235	1	2.09179e-06	0.683209	0.338	0.255	0.0425575	0.280355	1.67342e-05
Reep1	0.00160479	0.543659	0.534	0.481	1	3.038e-07	0.620285	0.553	0.483	0.00618081	0.000260991	0.568177	0.568	0.543	1	0.116165	0.490618	0.389	0.447	1	3.6531e-07	0.479734	0.526	0.458	0.00743224	0.00141052	0.47318	0.491	0.478	1	6.20133e-08	0.537688	0.638	0.546	0.00126166	7.16373e-12	0.5941	0.615	0.572	1.45746e-07	0.116165	5.73098e-11
Serinc1	4.04863e-13	0.653455	0.931	0.908	8.23695e-09	8.61145e-16	0.541958	0.921	0.909	1.752e-11	4.63899e-23	0.64468	0.988	0.938	9.43802e-19	2.77375e-21	0.565295	0.906	0.907	5.6432e-17	2.91338e-19	0.521313	0.913	0.894	5.92726e-15	8.78711e-16	0.472576	0.927	0.894	1.78774e-11	3.29022e-23	0.594565	0.971	0.941	6.69396e-19	2.83335e-28	0.481543	0.944	0.929	5.76445e-24	4.04863e-13	2.26668e-27
Nat8l	0.244547	0.477043	0.345	0.367	1	0.170633	0.419328	0.36	0.397	1	6.9096e-05	0.606409	0.519	0.455	1	0.732462	0.275143	0.289	0.382	1	0.0146327	0.445163	0.387	0.392	1	2.50463e-07	0.468861	0.573	0.465	0.00509566	4.79542e-09	0.632598	0.59	0.47	9.75629e-05	0.000505515	0.388147	0.474	0.477	1	0.732462	3.83634e-08
Gria2	8.54566e-07	0.474955	0.948	0.931	0.0173862	8.50965e-18	0.475611	0.956	0.965	1.73129e-13	1.0849e-13	0.498573	0.951	0.962	2.20723e-09	1.69178e-32	0.544453	0.987	0.979	3.44192e-28	2.70612e-18	0.448755	0.948	0.955	5.50559e-14	4.46427e-16	0.465955	0.955	0.96	9.08255e-12	7.73499e-16	0.404399	0.99	0.977	1.57368e-11	2.42274e-25	0.391919	0.986	0.976	4.92906e-21	8.54566e-07	1.35342e-31
Syp	6.20395e-15	0.786187	0.914	0.839	1.26219e-10	8.02034e-09	0.423806	0.816	0.785	0.000163174	1.15009e-06	0.424276	0.901	0.874	0.0233985	2.0816e-08	0.37386	0.752	0.784	0.000423502	1.56889e-09	0.370005	0.786	0.802	3.19191e-05	1.00699e-08	0.464682	0.8	0.844	0.000204872	9.17168e-14	0.507944	0.895	0.867	1.86598e-09	1.62573e-41	0.544309	0.995	0.939	3.30754e-37	1.15009e-06	1.30058e-40
Tmem255a	0.00131835	0.615217	0.638	0.689	1	0.00272235	0.463831	0.614	0.699	1	2.56625e-12	0.709866	0.877	0.73	5.22104e-08	1.15618e-07	0.578319	0.664	0.672	0.00235224	7.00822e-08	0.540945	0.659	0.653	0.00142582	0.00141745	0.463873	0.609	0.646	1	9.58708e-13	0.701961	0.79	0.73	1.95049e-08	4.18423e-25	0.804575	0.765	0.673	8.51281e-21	0.00272235	3.34738e-24
Bsg	0.000881222	0.437514	0.672	0.658	1	4.68341e-05	0.398182	0.649	0.656	0.95284	1.06354e-09	0.59813	0.815	0.725	2.16377e-05	1.1965e-06	0.56755	0.591	0.607	0.0243428	3.06651e-07	0.424654	0.636	0.626	0.00623881	1.49846e-06	0.463037	0.682	0.684	0.0304861	2.79025e-06	0.402967	0.733	0.711	0.0567677	4.96204e-18	0.49231	0.798	0.763	1.00953e-13	0.000881222	3.96963e-17
Cntn1	1.92429e-08	0.608368	0.828	0.724	0.000391498	2.77763e-12	0.581431	0.807	0.754	5.65108e-08	1.93534e-14	0.698949	0.877	0.794	3.93746e-10	8.39157e-12	0.44494	0.785	0.775	1.70727e-07	6.08627e-19	0.532593	0.827	0.754	1.23825e-14	3.59521e-07	0.460801	0.782	0.762	0.00731445	9.46659e-18	0.592932	0.914	0.823	1.92598e-13	1.16388e-25	0.539823	0.878	0.809	2.36792e-21	3.59521e-07	9.31107e-25
Edil3	0.0692126	0.31768	0.466	0.451	1	0.00266545	0.464073	0.526	0.522	1	1.13e-05	0.498454	0.642	0.522	0.229899	4.11234e-07	0.562295	0.584	0.523	0.00836655	2.38222e-06	0.515619	0.566	0.515	0.0484663	0.00363393	0.456242	0.509	0.49	1	4.65586e-08	0.536314	0.667	0.556	0.000947234	2.65337e-19	0.634015	0.69	0.548	5.39827e-15	0.0692126	2.12269e-18
Ntrk3	0.0010106	0.693878	0.534	0.5	1	7.27732e-06	0.571218	0.579	0.534	0.148057	0.0170547	0.474862	0.531	0.558	1	0.000240729	0.54113	0.517	0.533	1	9.7313e-05	0.396592	0.543	0.533	1	0.000721452	0.456102	0.545	0.545	1	0.0298865	0.372935	0.533	0.576	1	4.87144e-12	0.615566	0.624	0.573	9.91094e-08	0.0298865	3.89715e-11
Nrxn2	2.97187e-06	0.449152	0.879	0.868	0.0604628	1.83824e-06	0.298737	0.868	0.883	0.0373991	1.00555e-05	0.329714	0.914	0.9	0.204579	1.96675e-13	0.380635	0.872	0.872	4.00134e-09	7.51726e-11	0.339619	0.844	0.835	1.52939e-06	1.2824e-10	0.453358	0.873	0.863	2.60904e-06	4.57085e-08	0.295056	0.905	0.903	0.000929938	1.82856e-13	0.352975	0.897	0.903	3.72021e-09	1.00555e-05	1.46285e-12
Atp2a2	2.26457e-07	0.712219	0.759	0.73	0.00460727	2.40971e-16	0.67171	0.816	0.733	4.90255e-12	1.24935e-18	0.761725	0.877	0.763	2.5418e-14	9.80154e-12	0.677973	0.685	0.704	1.99412e-07	7.91687e-14	0.630886	0.723	0.676	1.61069e-09	2.1504e-05	0.453056	0.664	0.727	0.437498	3.98543e-20	0.70666	0.886	0.799	8.10836e-16	5.15773e-33	0.732097	0.854	0.788	1.04934e-28	2.1504e-05	4.12619e-32
Scamp1	5.8399e-05	0.642502	0.638	0.607	1	4.79441e-07	0.452242	0.658	0.639	0.00975422	6.23071e-10	0.618786	0.741	0.676	1.26764e-05	0.914806	0.268058	0.43	0.588	1	3.42155e-05	0.376806	0.584	0.613	0.696115	7.63756e-05	0.452564	0.618	0.655	1	0.000218027	0.379003	0.676	0.698	1	2.84443e-13	0.494077	0.714	0.708	5.787e-09	0.914806	2.27555e-12
Clstn3	4.65203e-07	0.749149	0.672	0.592	0.00946456	0.000188169	0.479775	0.596	0.617	1	5.15622e-12	0.642219	0.802	0.688	1.04903e-07	0.00362331	0.425282	0.523	0.591	1	9.5175e-08	0.499141	0.624	0.589	0.00193633	1.43921e-06	0.451146	0.691	0.649	0.0292808	1.05613e-14	0.596285	0.81	0.681	2.14869e-10	6.31907e-16	0.51824	0.756	0.729	1.28561e-11	0.00362331	5.05525e-15
Atp6ap2	0.0157108	0.541352	0.534	0.561	1	0.0011496	0.463521	0.553	0.588	1	2.52579e-10	0.604974	0.753	0.629	5.13871e-06	0.00322768	0.418864	0.517	0.556	1	1.35513e-12	0.598039	0.647	0.549	2.75701e-08	0.000308095	0.450057	0.536	0.548	1	8.94583e-14	0.640529	0.771	0.627	1.82003e-09	7.84624e-26	0.687102	0.761	0.629	1.59632e-21	0.0157108	6.27699e-25
Itfg1	6.09435e-06	0.68433	0.638	0.562	0.12399	5.43202e-09	0.620119	0.684	0.634	0.000110514	1.26761e-12	0.730341	0.778	0.641	2.57896e-08	8.3149e-06	0.484459	0.591	0.62	0.169167	1.56042e-15	0.680138	0.699	0.601	3.17467e-11	5.52486e-05	0.449973	0.609	0.61	1	1.25968e-13	0.605125	0.781	0.67	2.56282e-09	1.62468e-33	0.764771	0.779	0.621	3.30542e-29	5.52486e-05	1.29975e-32
Miat	0.0816352	0.361554	0.397	0.375	1	0.0992655	0.304147	0.412	0.436	1	0.027396	0.337982	0.469	0.477	1	0.429898	0.37062	0.349	0.407	1	0.210092	0.384501	0.347	0.379	1	0.000408042	0.447986	0.509	0.47	1	4.58042e-07	0.495487	0.562	0.446	0.00931886	0.0132219	0.337535	0.474	0.513	1	0.429898	3.66433e-06
Epha4	0.287365	0.405206	0.293	0.279	1	1.82899e-06	0.758222	0.386	0.249	0.0372109	2.8395e-09	0.815651	0.494	0.273	5.77696e-05	5.76866e-05	0.660088	0.362	0.275	1	0.0163453	0.557608	0.301	0.264	1	0.0118474	0.441084	0.327	0.266	1	1.03878e-09	0.89804	0.486	0.298	2.1134e-05	1.15607e-32	0.971742	0.573	0.29	2.35203e-28	0.287365	9.24857e-32
Pgrmc1	7.80534e-13	0.785067	0.879	0.88	1.588e-08	2.00888e-17	0.595202	0.921	0.878	4.08706e-13	1.04335e-24	0.763789	0.975	0.913	2.12269e-20	3.77587e-22	0.686055	0.852	0.851	7.68201e-18	9.17281e-24	0.567419	0.908	0.861	1.86621e-19	3.51513e-11	0.439655	0.873	0.869	7.15154e-07	4.81478e-26	0.733052	0.99	0.907	9.79566e-22	2.64726e-56	0.792669	0.986	0.891	5.38586e-52	3.51513e-11	2.11781e-55
Atp2b1	0.712642	0.301705	0.483	0.632	1	4.26018e-13	0.676705	0.772	0.662	8.66733e-09	1.07759e-07	0.513336	0.753	0.674	0.00219235	9.58362e-07	0.556606	0.638	0.66	0.0194979	1.07499e-06	0.598288	0.653	0.645	0.0218706	0.00235858	0.438613	0.673	0.72	1	6.79771e-08	0.524486	0.752	0.72	0.00138299	8.72616e-14	0.509905	0.751	0.702	1.77534e-09	0.712642	6.98093e-13
Adgrl3	0.343047	0.469805	0.362	0.397	1	0.0133967	0.376174	0.447	0.438	1	2.80472e-05	0.57421	0.531	0.451	0.570621	0.801969	0.28993	0.362	0.457	1	0.106929	0.298111	0.41	0.442	1	0.000223269	0.437511	0.5	0.438	1	0.0138549	0.326877	0.476	0.464	1	0.0997771	0.292283	0.404	0.441	1	0.801969	0.000224356
Lnpep	0.180784	0.437757	0.431	0.455	1	0.000156928	0.46362	0.561	0.529	1	1.43968e-06	0.610678	0.605	0.523	0.0292902	0.000141906	0.509404	0.517	0.524	1	1.33797e-12	0.653146	0.63	0.523	2.72211e-08	1.69157e-05	0.437001	0.573	0.539	0.34415	2.42871e-10	0.640666	0.676	0.59	4.94121e-06	2.54398e-14	0.584374	0.629	0.553	5.17574e-10	0.180784	2.03519e-13
Nsg1	3.93649e-06	0.490187	0.862	0.825	0.0800879	5.42876e-07	0.432421	0.746	0.773	0.0110448	0.000159805	0.37161	0.802	0.846	1	7.4069e-07	0.453941	0.685	0.759	0.0150693	2.91478e-11	0.465727	0.757	0.762	5.93011e-07	5.49894e-10	0.430733	0.827	0.815	1.11876e-05	6.3511e-11	0.511342	0.857	0.845	1.29213e-06	6.22015e-31	0.568769	0.911	0.851	1.26549e-26	0.000159805	4.97612e-30
Mir124-2hg	0.272691	0.369804	0.241	0.209	1	0.0547216	0.377499	0.289	0.249	1	0.000474157	0.450311	0.383	0.265	1	0.0339266	0.484529	0.275	0.245	1	0.0056348	0.389239	0.312	0.255	1	0.0144309	0.428912	0.373	0.33	1	0.00121138	0.458045	0.362	0.277	1	0.383778	0.270176	0.282	0.309	1	0.383778	0.00378697
Glra3	0.00853723	0.673611	0.259	0.16	1	0.000555017	0.593695	0.289	0.196	1	0.000465355	0.622566	0.309	0.192	1	0.508778	0.353853	0.201	0.206	1	0.0455243	0.436937	0.214	0.177	1	0.064084	0.428693	0.255	0.216	1	0.0347216	0.375134	0.286	0.24	1	1.66885e-06	0.54442	0.3	0.201	0.0339527	0.508778	1.33507e-05
Nrxn3	7.93345e-08	0.49435	0.914	0.806	0.00161406	1.37181e-07	0.377168	0.886	0.81	0.00279094	3.46433e-13	0.558931	0.938	0.82	7.04819e-09	5.5277e-13	0.505382	0.893	0.807	1.12461e-08	9.48103e-19	0.495045	0.913	0.791	1.92892e-14	5.39353e-08	0.428044	0.882	0.789	0.00109731	8.82173e-10	0.452636	0.905	0.808	1.79478e-05	1.88134e-46	0.727451	0.972	0.823	3.82758e-42	1.37181e-07	1.50507e-45
Scn3b	0.230073	0.291457	0.414	0.45	1	0.0352746	0.38802	0.447	0.468	1	8.77036e-06	0.548641	0.593	0.511	0.178433	0.0595438	0.390666	0.403	0.447	1	0.000579105	0.489544	0.468	0.451	1	0.00288478	0.428035	0.5	0.494	1	0.0122591	0.376958	0.514	0.522	1	6.92016e-07	0.403684	0.535	0.497	0.0140791	0.230073	5.53612e-06
Elmod1	8.06557e-06	0.777238	0.621	0.521	0.164094	0.0131657	0.40548	0.518	0.548	1	1.55562e-07	0.587511	0.679	0.592	0.00316492	0.000130118	0.549893	0.53	0.566	1	2.46956e-05	0.465159	0.566	0.558	0.502431	2.31281e-05	0.426507	0.6	0.578	0.470542	3.2775e-10	0.678799	0.667	0.602	6.66807e-06	1.69914e-18	0.651307	0.7	0.615	3.4569e-14	0.0131657	1.35931e-17
Slc22a17	3.96314e-08	0.650054	0.845	0.819	0.0008063	3.83069e-10	0.423607	0.825	0.839	7.79354e-06	8.91528e-08	0.415256	0.877	0.874	0.00181381	1.1358e-09	0.496883	0.758	0.809	2.31079e-05	1.12649e-07	0.336888	0.769	0.798	0.00229185	6.80284e-11	0.425589	0.845	0.815	1.38404e-06	1.28429e-15	0.471018	0.962	0.85	2.61289e-11	6.84285e-18	0.403472	0.897	0.871	1.39218e-13	1.12649e-07	5.47428e-17
Adam11	0.261322	0.251421	0.224	0.187	1	0.0131432	0.445139	0.263	0.2	1	0.044517	0.462508	0.259	0.208	1	0.0614092	0.484157	0.201	0.166	1	0.0324605	0.326067	0.22	0.178	1	0.0825121	0.425585	0.255	0.22	1	0.0595443	0.292134	0.267	0.224	1	2.83867e-05	0.530151	0.347	0.279	0.577528	0.261322	0.000227071
Grina	0.000150279	0.58542	0.638	0.623	1	1.65637e-07	0.54366	0.658	0.637	0.00336988	3.36633e-05	0.438187	0.704	0.705	0.68488	0.000642103	0.43515	0.557	0.608	1	0.00738467	0.37433	0.538	0.61	1	7.66571e-07	0.421629	0.682	0.688	0.0155959	8.25028e-08	0.479346	0.714	0.69	0.00167852	1.53592e-43	0.769212	0.897	0.743	3.12484e-39	0.00738467	1.22874e-42
Mboat7	0.378414	0.346018	0.466	0.543	1	0.0427099	0.365845	0.5	0.565	1	1.15073e-05	0.513958	0.654	0.632	0.234115	0.0164706	0.376253	0.497	0.579	1	0.177712	0.276055	0.486	0.567	1	0.00126704	0.420395	0.591	0.647	1	5.26724e-06	0.482499	0.657	0.635	0.107162	0.00174154	0.327998	0.535	0.603	1	0.378414	4.21371e-05
Slc6a7	0.0754262	0.5317	0.293	0.242	1	0.573776	0.263913	0.228	0.243	1	0.10785	0.373885	0.296	0.271	1	0.525581	0.36012	0.215	0.227	1	0.00248397	0.432815	0.283	0.222	1	0.00130171	0.418684	0.355	0.275	1	0.000467508	0.426649	0.371	0.286	1	3.27707e-08	0.574751	0.441	0.354	0.000666721	0.573776	2.62166e-07
Rsrp1	0.000174541	0.463043	0.724	0.744	1	1.14259e-16	0.560282	0.912	0.909	2.3246e-12	3.45859e-10	0.443681	0.864	0.925	7.0365e-06	1.65209e-10	0.437822	0.826	0.874	3.36117e-06	1.37487e-12	0.413894	0.85	0.874	2.79718e-08	1.36889e-13	0.418413	0.945	0.937	2.78501e-09	1.05717e-09	0.402319	0.886	0.895	2.15081e-05	4.21659e-26	0.476442	0.92	0.874	8.57865e-22	0.000174541	3.37327e-25
App	8.06953e-17	0.85923	0.966	0.886	1.64175e-12	7.27336e-14	0.512845	0.904	0.896	1.47976e-09	1.89164e-24	0.692244	1	0.92	3.84854e-20	8.65286e-23	0.576979	0.94	0.917	1.76042e-18	6.3475e-24	0.604198	0.936	0.895	1.2914e-19	2.74625e-11	0.41764	0.891	0.87	5.58724e-07	2.85296e-24	0.681855	0.971	0.922	5.80435e-20	2.37312e-51	0.734822	0.967	0.924	4.8281e-47	2.74625e-11	1.89849e-50
Chst2	0.92963	0.253751	0.155	0.171	1	0.833847	0.313769	0.167	0.18	1	6.13948e-05	0.537086	0.333	0.198	1	0.229289	0.485998	0.174	0.16	1	0.00307905	0.48038	0.237	0.174	1	0.00115082	0.417365	0.336	0.246	1	0.03417	0.394814	0.276	0.228	1	3.77054e-08	0.583378	0.357	0.243	0.000767117	0.92963	3.01643e-07
Slc39a10	0.426639	0.27479	0.379	0.394	1	0.0166755	0.401047	0.412	0.405	1	0.00190351	0.379586	0.469	0.416	1	0.110202	0.440854	0.362	0.381	1	0.00200088	0.436543	0.41	0.379	1	0.00113491	0.416983	0.418	0.357	1	2.49439e-07	0.576824	0.543	0.422	0.00507483	4.67748e-05	0.502403	0.441	0.411	0.951632	0.426639	1.99551e-06
Calr	3.61438e-06	0.734772	0.741	0.742	0.0735345	3.759e-08	0.537745	0.693	0.686	0.000764769	5.13586e-15	0.756702	0.84	0.711	1.04489e-10	0.0318982	0.43748	0.53	0.649	1	1.90831e-07	0.465064	0.642	0.637	0.00388246	0.000931927	0.416265	0.627	0.687	1	9.01735e-12	0.63748	0.771	0.748	1.83458e-07	1.79378e-28	0.61343	0.859	0.773	3.64945e-24	0.0318982	1.43503e-27
Blcap	0.341299	0.46191	0.431	0.517	1	0.0753223	0.334432	0.482	0.548	1	0.0254955	0.344674	0.543	0.61	1	0.547326	0.326311	0.396	0.512	1	0.00630438	0.413824	0.491	0.53	1	0.000278844	0.41542	0.573	0.573	1	1.68867e-08	0.506777	0.676	0.594	0.00034356	0.00147044	0.37172	0.531	0.582	1	0.547326	1.35094e-07
AC149090.1	0.002425	0.484618	0.69	0.756	1	4.17804e-09	0.525745	0.763	0.754	8.50022e-05	0.000835274	0.27989	0.679	0.685	1	1.27221e-05	0.38849	0.698	0.754	0.258831	0.00211655	0.301136	0.618	0.687	1	1.46736e-06	0.413306	0.736	0.724	0.0298535	0.00080007	0.427272	0.581	0.574	1	2.34568e-16	0.631483	0.751	0.732	4.77229e-12	0.002425	1.87654e-15
Cpe	1.90217e-07	0.606674	0.81	0.801	0.00386997	3.53004e-05	0.371709	0.789	0.826	0.718186	5.96099e-12	0.567027	0.889	0.875	1.21276e-07	4.6447e-16	0.547427	0.812	0.812	9.44965e-12	5.55659e-10	0.427104	0.757	0.779	1.13049e-05	3.00601e-06	0.412347	0.773	0.81	0.0611573	1.29991e-12	0.500506	0.914	0.857	2.64467e-08	5.31514e-30	0.542645	0.915	0.856	1.08137e-25	3.53004e-05	4.25211e-29
Hspa5	0.00064523	0.650095	0.621	0.579	1	0.0722867	0.355542	0.518	0.603	1	5.63331e-07	0.72468	0.642	0.57	0.011461	9.09767e-08	0.687343	0.57	0.521	0.00185092	0.0649676	0.369596	0.439	0.482	1	7.2767e-05	0.412289	0.573	0.536	1	1.57078e-09	0.477131	0.724	0.641	3.19576e-05	1.5387e-16	0.497448	0.704	0.597	3.13048e-12	0.0722867	1.23096e-15
Nlgn3	0.293939	0.313385	0.483	0.571	1	3.72333e-05	0.554914	0.57	0.543	0.757512	0.0255453	0.340349	0.543	0.585	1	0.0143913	0.481129	0.456	0.502	1	0.14756	0.280548	0.451	0.515	1	0.000212829	0.403736	0.555	0.555	1	4.0687e-08	0.499095	0.676	0.585	0.000827777	5.76815e-05	0.349242	0.596	0.659	1	0.293939	3.25496e-07
Tmem179	0.00550373	0.524792	0.569	0.597	1	0.00495147	0.37142	0.553	0.597	1	3.66992e-06	0.440363	0.716	0.654	0.0746644	0.0344744	0.374581	0.483	0.559	1	0.0438432	0.287047	0.491	0.548	1	1.83463e-05	0.402762	0.645	0.644	0.373256	0.00391634	0.326541	0.619	0.657	1	3.81286e-09	0.464022	0.643	0.654	7.75726e-05	0.0438432	3.05029e-08
Fam8a1	3.84585e-05	0.666371	0.638	0.544	0.782439	0.00670644	0.396797	0.518	0.542	1	2.58232e-05	0.434363	0.642	0.592	0.525373	0.00209452	0.474342	0.477	0.493	1	3.64064e-08	0.569098	0.561	0.508	0.000740689	1.00536e-05	0.40184	0.609	0.567	0.20454	1.04776e-07	0.449374	0.667	0.593	0.00213167	3.86871e-08	0.400021	0.596	0.568	0.000787088	0.00670644	2.91251e-07
Prnp	1.28521e-10	0.651972	0.897	0.852	2.61476e-06	2.35156e-14	0.521731	0.886	0.844	4.78424e-10	9.66414e-07	0.417647	0.889	0.899	0.0196617	3.38615e-05	0.337799	0.752	0.848	0.688912	1.46866e-06	0.287121	0.775	0.833	0.0298799	1.87685e-06	0.401272	0.809	0.838	0.0381844	2.70361e-13	0.493483	0.924	0.886	5.50049e-09	4.61766e-25	0.530453	0.911	0.881	9.39464e-21	3.38615e-05	3.69413e-24
Wsb1	0.000168696	0.739165	0.5	0.367	1	4.86644e-10	0.646191	0.675	0.566	9.90077e-06	0.0385814	0.374046	0.481	0.507	1	0.00937775	0.382368	0.483	0.501	1	5.80979e-06	0.458529	0.555	0.497	0.1182	0.000159713	0.400255	0.555	0.487	1	7.66628e-09	0.451761	0.657	0.513	0.00015597	9.22016e-10	0.473684	0.592	0.539	1.87584e-05	0.0385814	3.89315e-09
Vstm2l	0.00258997	0.852971	0.466	0.387	1	5.31559e-12	0.93248	0.544	0.35	1.08146e-07	7.09645e-09	0.8563	0.58	0.399	0.000144377	2.31744e-06	0.708979	0.45	0.363	0.0471483	3.97995e-05	0.682185	0.405	0.341	0.809721	0.0364591	0.400133	0.409	0.402	1	1.02021e-06	0.638971	0.505	0.377	0.0207562	1.04231e-21	0.800967	0.643	0.467	2.12059e-17	0.0364591	8.33852e-21
Syngr1	0.000613104	0.506668	0.672	0.678	1	0.000881938	0.298924	0.64	0.672	1	0.000793988	0.316329	0.716	0.753	1	0.241016	0.278522	0.523	0.685	1	0.00397712	0.274373	0.595	0.677	1	0.000199703	0.399408	0.682	0.725	1	8.96899e-06	0.34405	0.752	0.747	0.182474	0.000162111	0.259132	0.714	0.773	1	0.241016	7.17497e-05
Slitrk4	0.0961895	0.464454	0.259	0.207	1	0.804681	0.329169	0.228	0.259	1	0.0278951	0.371084	0.321	0.254	1	0.429624	0.345544	0.268	0.291	1	3.49914e-05	0.529875	0.347	0.254	0.7119	0.0109122	0.398974	0.318	0.256	1	4.96507e-05	0.535673	0.419	0.302	1	1.30664e-14	0.626526	0.455	0.275	2.65835e-10	0.804681	1.04531e-13
Acp1	3.49842e-06	0.653963	0.776	0.722	0.0711753	9.32821e-09	0.474294	0.798	0.802	0.000189783	0.00340663	0.323484	0.704	0.789	1	2.02358e-10	0.513712	0.785	0.806	4.11698e-06	1.06105e-11	0.55074	0.769	0.761	2.1587e-07	6.97412e-07	0.398419	0.791	0.79	0.0141888	1.2266e-08	0.485108	0.829	0.8	0.000249553	0.000137767	0.380924	0.653	0.726	1	0.00340663	8.48838e-11
Hsp90b1	0.0422204	0.324481	0.586	0.655	1	0.000903939	0.3465	0.649	0.708	1	8.98791e-06	0.488524	0.741	0.705	0.182859	0.00507041	0.392374	0.564	0.663	1	4.18498e-06	0.42815	0.613	0.634	0.0851434	0.000158616	0.393504	0.627	0.685	1	1.84797e-08	0.476388	0.752	0.731	0.00037597	5.00296e-13	0.453752	0.7	0.669	1.01785e-08	0.0422204	4.00237e-12
Glra2	0.0561413	0.792238	0.241	0.174	1	0.0605176	0.460959	0.211	0.167	1	0.0129801	0.452075	0.296	0.216	1	8.81218e-08	0.788774	0.322	0.186	0.00179284	0.286538	0.36911	0.202	0.191	1	0.113127	0.393465	0.245	0.215	1	5.50303e-05	0.613074	0.333	0.215	1	0.001077	0.487618	0.296	0.24	1	0.286538	7.04974e-07
Atp6v0e2	1.45788e-07	0.626651	0.759	0.692	0.00296605	0.00280108	0.375845	0.614	0.694	1	5.22374e-11	0.581959	0.815	0.754	1.06277e-06	0.0902869	0.377106	0.517	0.674	1	2.30581e-08	0.473117	0.688	0.679	0.000469117	1.77379e-06	0.391329	0.718	0.746	0.0360878	1.78759e-12	0.556399	0.829	0.75	3.63685e-08	4.91639e-19	0.502259	0.812	0.772	1.00024e-14	0.0902869	3.93312e-18
Unc5d	0.119257	0.312482	0.466	0.474	1	0.00796788	0.511944	0.509	0.526	1	0.0350377	0.321089	0.543	0.549	1	1.53896e-07	0.596044	0.604	0.552	0.00313101	0.0445802	0.347578	0.486	0.51	1	0.033486	0.387563	0.536	0.552	1	0.00607285	0.327835	0.581	0.584	1	2.6895e-19	0.617419	0.695	0.531	5.4718e-15	0.119257	2.1516e-18
Atp6v0b	0.00249472	0.429522	0.707	0.751	1	6.70067e-06	0.354345	0.737	0.781	0.136325	6.76186e-07	0.380518	0.802	0.772	0.013757	7.26745e-06	0.442869	0.658	0.72	0.147856	5.30881e-06	0.32033	0.688	0.702	0.108008	8.93827e-08	0.386684	0.782	0.79	0.00181849	7.28128e-05	0.300048	0.762	0.771	1	5.95661e-08	0.288798	0.77	0.801	0.00121187	0.00249472	4.76528e-07
Scn2a	3.19249e-09	0.583519	0.862	0.781	6.49513e-05	1.03812e-10	0.561179	0.833	0.812	2.11205e-06	2.76293e-07	0.513915	0.84	0.85	0.00562119	2.46687e-08	0.393991	0.765	0.816	0.000501884	5.25264e-08	0.339851	0.757	0.792	0.00106865	1.29314e-08	0.386026	0.818	0.833	0.000263089	1.15637e-21	0.659715	0.943	0.867	2.35264e-17	9.99417e-34	0.581936	0.915	0.835	2.03331e-29	2.76293e-07	7.99534e-33
Atp1a3	3.80771e-06	0.453554	0.776	0.747	0.0774679	0.000376292	0.314878	0.667	0.71	1	0.0560271	0.253609	0.667	0.761	1	0.0092531	0.310963	0.577	0.686	1	0.0058364	0.334652	0.59	0.688	1	1.90908e-05	0.381103	0.691	0.719	0.388402	8.10755e-12	0.543512	0.81	0.725	1.64948e-07	7.28975e-25	0.511641	0.901	0.847	1.4831e-20	0.0560271	5.8318e-24
March6	8.64496e-05	0.528469	0.655	0.631	1	9.38643e-06	0.483787	0.649	0.689	0.190967	1.13758e-15	0.677357	0.864	0.722	2.31441e-11	0.000157874	0.460862	0.577	0.642	1	4.76606e-06	0.410163	0.613	0.641	0.0969654	0.000583421	0.380522	0.636	0.706	1	4.07459e-14	0.565523	0.819	0.73	8.28975e-10	3.99868e-21	0.590594	0.784	0.728	8.13532e-17	0.000583421	3.19894e-20
4430402I18Rik	0.165364	0.353226	0.259	0.213	1	1.63328e-05	0.506202	0.447	0.317	0.332292	0.0267448	0.335987	0.346	0.283	1	0.0167634	0.504057	0.336	0.306	1	0.320107	0.258573	0.283	0.29	1	0.000360529	0.377612	0.418	0.314	1	0.0071662	0.312277	0.371	0.303	1	0.000390856	0.422163	0.3	0.235	1	0.320107	0.000130655
Chl1	0.0013451	0.71238	0.517	0.45	1	0.00060115	0.426773	0.544	0.493	1	5.17955e-06	0.504296	0.63	0.519	0.105378	0.00659199	0.405711	0.477	0.492	1	5.56047e-18	0.701953	0.676	0.492	1.13128e-13	0.0348721	0.377307	0.491	0.485	1	2.99175e-08	0.564364	0.667	0.541	0.000608671	1.27701e-11	0.683686	0.601	0.527	2.59809e-07	0.0348721	4.44837e-17
Grik1	9.38775e-08	0.837647	0.431	0.196	0.00190994	0.00596696	0.630769	0.289	0.221	1	0.127562	0.393181	0.259	0.228	1	0.000210707	0.699433	0.268	0.182	1	0.00190422	0.517918	0.237	0.167	1	0.0199768	0.375473	0.318	0.261	1	0.0163548	0.38991	0.324	0.273	1	2.78669e-06	0.565322	0.333	0.237	0.0566952	0.127562	7.5102e-07
Ptprt	0.0541358	0.541956	0.259	0.188	1	0.0184714	0.541739	0.272	0.215	1	1.59291e-05	0.590907	0.395	0.239	0.324077	0.426017	0.350492	0.235	0.242	1	0.00541952	0.412438	0.266	0.203	1	0.404291	0.373422	0.236	0.235	1	0.0857135	0.419533	0.286	0.253	1	0.000162793	0.461455	0.315	0.244	1	0.426017	0.000127425
Ggt7	0.0834835	0.458499	0.259	0.201	1	0.253747	0.325424	0.237	0.222	1	0.846205	0.251447	0.198	0.243	1	0.0901204	0.361089	0.221	0.191	1	0.0176226	0.346139	0.26	0.211	1	0.00139262	0.369701	0.336	0.249	1	0.00644502	0.390377	0.314	0.245	1	3.0788e-07	0.536547	0.376	0.279	0.00626382	0.846205	2.46304e-06
Ube3a	4.16961e-16	0.760964	0.983	0.968	8.48308e-12	1.14106e-25	0.563711	0.991	0.984	2.32148e-21	9.92009e-17	0.445121	1	0.98	2.01824e-12	1.26207e-26	0.472223	0.987	0.985	2.56768e-22	2.01092e-29	0.471917	0.988	0.978	4.09122e-25	1.10929e-13	0.358246	0.991	0.983	2.25685e-09	8.83625e-19	0.382712	1	0.989	1.79773e-14	2.2358e-27	0.40692	0.977	0.982	4.54874e-23	1.10929e-13	1.60874e-28
Dner	1.49588e-05	0.567858	0.69	0.644	0.304337	3.82572e-06	0.439361	0.675	0.67	0.0778342	1.01444e-06	0.465896	0.716	0.68	0.0206387	0.0339921	0.388254	0.537	0.661	1	4.01697e-05	0.480631	0.59	0.621	0.817253	0.0109603	0.358	0.582	0.649	1	0.00012943	0.36169	0.714	0.717	1	5.09351e-12	0.469532	0.737	0.739	1.03627e-07	0.0339921	4.07481e-11
Elovl4	4.33438e-08	0.922283	0.603	0.387	0.00088183	0.275238	0.365568	0.272	0.277	1	0.00174686	0.509745	0.42	0.35	1	0.314223	0.448727	0.268	0.288	1	0.000857827	0.455832	0.37	0.311	1	0.0622641	0.357316	0.345	0.327	1	4.38929e-06	0.627575	0.486	0.377	0.0893002	2.73474e-14	0.614909	0.596	0.475	5.56383e-10	0.314223	2.18779e-13
Slc38a1	0.0457162	0.338014	0.534	0.594	1	0.00849856	0.426849	0.57	0.665	1	0.00126198	0.483793	0.617	0.664	1	0.0425719	0.355543	0.53	0.636	1	0.00031646	0.315293	0.613	0.643	1	0.00792832	0.354884	0.627	0.698	1	4.35963e-09	0.518022	0.752	0.716	8.86967e-05	1.55229e-08	0.378645	0.685	0.704	0.000315813	0.0457162	3.48771e-08
Spock3	9.86684e-09	1.08088	0.621	0.407	0.000200741	4.90019e-07	0.748275	0.561	0.49	0.00996943	1.05969e-17	1.01639	0.765	0.486	2.15595e-13	4.98387e-23	1.01212	0.698	0.476	1.01397e-18	1.57349e-18	0.889266	0.63	0.444	3.20127e-14	0.122268	0.353454	0.464	0.475	1	7.32224e-08	0.757812	0.629	0.536	0.00148971	6.75872e-35	0.903672	0.779	0.552	1.37506e-30	0.122268	5.40698e-34
Igsf8	0.674597	0.251453	0.241	0.314	1	0.196496	0.400754	0.316	0.329	1	0.0647547	0.369812	0.383	0.378	1	0.3949	0.298528	0.235	0.325	1	0.490744	0.254229	0.295	0.323	1	0.163397	0.352002	0.345	0.37	1	0.0863203	0.291436	0.362	0.361	1	0.000625886	0.372907	0.408	0.384	1	0.674597	0.00499614
Cd200	7.00567e-06	0.565477	0.741	0.717	0.14253	6.50326e-06	0.51935	0.667	0.685	0.132309	1.24667e-05	0.411326	0.753	0.742	0.253635	4.10958e-10	0.554668	0.678	0.687	8.36095e-06	1.21387e-06	0.467654	0.642	0.672	0.0246963	0.000951974	0.348931	0.618	0.686	1	0.000590107	0.352666	0.686	0.765	1	7.94269e-15	0.467416	0.775	0.754	1.61594e-10	0.000951974	6.35415e-14
Hs6st2	8.37519e-08	0.880126	0.586	0.37	0.00170393	6.23702e-06	0.650629	0.482	0.375	0.126892	2.76948e-10	0.71685	0.642	0.413	5.63452e-06	0.000161506	0.578745	0.443	0.388	1	3.77313e-12	0.716243	0.538	0.374	7.67644e-08	0.0640286	0.347438	0.436	0.427	1	4.08375e-11	0.655931	0.648	0.447	8.30839e-07	5.34165e-14	0.793993	0.526	0.393	1.08676e-09	0.0640286	4.27332e-13
Lynx1	0.0116989	0.540753	0.397	0.318	1	0.0011836	0.458685	0.412	0.35	1	0.0178035	0.445234	0.42	0.396	1	0.00646863	0.516497	0.369	0.346	1	0.00229932	0.444975	0.387	0.348	1	0.450439	0.346195	0.382	0.453	1	5.0128e-07	0.484019	0.581	0.467	0.0101985	2.15931e-05	0.445414	0.507	0.476	0.439312	0.450439	4.01024e-06
Gabra2	0.107895	0.330037	0.483	0.496	1	0.472772	0.288525	0.421	0.512	1	0.00649414	0.459667	0.519	0.518	1	0.000815975	0.518993	0.483	0.479	1	0.144062	0.267149	0.422	0.457	1	0.00104562	0.344608	0.573	0.543	1	4.43833e-05	0.373578	0.59	0.541	0.902979	0.00435199	0.404168	0.46	0.467	1	0.472772	0.000355011
Tenm1	2.62529e-05	0.698725	0.603	0.474	0.534115	7.56957e-08	0.677956	0.57	0.459	0.00154003	2.07243e-06	0.607603	0.593	0.485	0.0421637	2.10609e-05	0.58521	0.537	0.53	0.428483	1.88447e-06	0.589923	0.538	0.492	0.0383395	0.0149296	0.3437	0.509	0.516	1	1.54609e-06	0.663701	0.6	0.545	0.0314551	2.17161e-09	0.602345	0.582	0.532	4.41814e-05	0.0149296	1.73729e-08
Gabbr1	5.59222e-09	0.628323	0.828	0.83	0.000113774	1.41398e-12	0.461365	0.86	0.852	2.87674e-08	2.90757e-11	0.565189	0.889	0.874	5.91545e-07	1.58423e-10	0.498123	0.765	0.834	3.22312e-06	9.7098e-14	0.453254	0.832	0.826	1.97546e-09	4.94867e-06	0.343678	0.791	0.862	0.100681	1.866e-18	0.53886	0.933	0.877	3.79638e-14	9.32686e-20	0.439189	0.873	0.892	1.89755e-15	4.94867e-06	7.46148e-19
Impad1	0.348527	0.275698	0.552	0.692	1	0.000572984	0.414883	0.64	0.711	1	2.36631e-10	0.567637	0.802	0.758	4.81426e-06	0.0155496	0.333472	0.584	0.69	1	7.53323e-07	0.355908	0.665	0.687	0.0153264	0.000409649	0.340759	0.664	0.718	1	4.04051e-06	0.357428	0.733	0.763	0.0822042	4.2027e-09	0.350897	0.732	0.76	8.5504e-05	0.348527	1.89305e-09
Rmst	0.00121638	0.820828	0.552	0.467	1	0.000593942	0.634938	0.518	0.499	1	3.80597e-05	0.575472	0.58	0.49	0.774324	0.0193867	0.389117	0.436	0.439	1	0.000134147	0.516926	0.457	0.397	1	0.141645	0.340075	0.455	0.473	1	0.026225	0.254545	0.505	0.491	1	1.84828e-07	0.524491	0.559	0.512	0.00376032	0.141645	1.47862e-06
Vstm2a	4.58562e-08	0.982853	0.621	0.43	0.000932945	2.37218e-06	0.689443	0.518	0.408	0.048262	2.48607e-11	0.778556	0.679	0.462	5.0579e-07	0.00102573	0.536146	0.463	0.45	1	2.37195e-10	0.631365	0.59	0.466	4.82573e-06	0.0147877	0.339844	0.436	0.409	1	1.74533e-07	0.582658	0.59	0.471	0.00355088	4.60068e-34	0.823173	0.761	0.522	9.36009e-30	0.0147877	3.68055e-33
Ache	0.0778177	0.472084	0.362	0.334	1	0.38234	0.323969	0.316	0.343	1	2.46783e-05	0.600885	0.506	0.401	0.50208	0.582399	0.395057	0.282	0.333	1	4.89182e-05	0.496988	0.41	0.333	0.995241	0.342999	0.336832	0.345	0.38	1	1.12194e-06	0.533569	0.505	0.382	0.0228259	1.2585e-17	0.745736	0.606	0.48	2.56043e-13	0.582399	1.0068e-16
Tm9sf3	0.0546825	0.540433	0.483	0.503	1	0.00170577	0.38138	0.526	0.52	1	0.00150026	0.480768	0.543	0.542	1	0.45232	0.368076	0.403	0.514	1	0.0214148	0.292324	0.457	0.489	1	0.0128832	0.335601	0.5	0.525	1	0.000233874	0.405059	0.6	0.59	1	7.11777e-11	0.517352	0.624	0.596	1.44811e-06	0.45232	5.69421e-10
Aplp1	8.03673e-05	0.496074	0.707	0.715	1	1.13722e-05	0.368947	0.737	0.761	0.231367	2.86946e-08	0.466846	0.852	0.803	0.000583792	0.0190284	0.3047	0.577	0.699	1	0.00107807	0.356279	0.624	0.704	1	2.54963e-06	0.332102	0.782	0.79	0.0518722	1.02352e-08	0.346599	0.838	0.776	0.000208234	5.57239e-09	0.323413	0.732	0.752	0.00011337	0.0190284	4.45792e-08
Nptn	0.00181321	0.614567	0.569	0.554	1	2.69901e-09	0.51897	0.746	0.698	5.49114e-05	5.74837e-11	0.615156	0.79	0.729	1.16951e-06	1.70921e-10	0.568045	0.678	0.669	3.47738e-06	3.42499e-11	0.549825	0.694	0.668	6.96814e-07	0.000102255	0.327976	0.627	0.618	1	1.06557e-10	0.5654	0.771	0.73	2.16791e-06	2.86643e-36	0.65946	0.883	0.777	5.83175e-32	0.00181321	2.29314e-35
Fut9	6.52392e-07	0.882771	0.603	0.408	0.0132729	2.63216e-10	0.696344	0.64	0.495	5.35514e-06	7.65554e-07	0.668354	0.63	0.526	0.0155752	4.71481e-06	0.624694	0.53	0.507	0.0959229	3.30763e-09	0.572528	0.584	0.489	6.72938e-05	0.00258853	0.325304	0.564	0.537	1	1.87187e-10	0.739705	0.676	0.574	3.80832e-06	7.87099e-12	0.533849	0.62	0.528	1.60135e-07	0.00258853	6.2968e-11
Cadm1	2.35044e-08	0.58168	0.828	0.793	0.000478197	1.50659e-07	0.381229	0.851	0.835	0.00306515	2.26446e-05	0.402713	0.827	0.84	0.460704	2.48018e-15	0.525421	0.819	0.814	5.04593e-11	1.31359e-07	0.384781	0.734	0.792	0.00267251	0.00250802	0.323931	0.736	0.802	1	5.30975e-07	0.357467	0.867	0.829	0.0108027	1.75876e-36	0.76114	0.92	0.866	3.57819e-32	0.00250802	1.40701e-35
Cd81	0.00174009	0.525006	0.586	0.577	1	0.00209474	0.416802	0.57	0.614	1	0.0012272	0.29314	0.654	0.661	1	0.46768	0.347909	0.443	0.577	1	0.000146168	0.38488	0.549	0.563	1	0.00403787	0.323598	0.564	0.604	1	0.00155889	0.313072	0.638	0.662	1	1.34902e-10	0.417997	0.685	0.704	2.74457e-06	0.46768	1.07921e-09
Cdh2	2.54106e-05	0.729498	0.638	0.571	0.516978	0.00805986	0.324819	0.535	0.567	1	0.0334422	0.319902	0.543	0.57	1	2.93905e-06	0.618857	0.57	0.565	0.0597949	3.18074e-06	0.498277	0.566	0.525	0.0647121	0.00495991	0.321816	0.527	0.516	1	3.12295e-06	0.476225	0.638	0.588	0.0635364	3.77684e-14	0.623555	0.653	0.56	7.68399e-10	0.0334422	3.02147e-13
Nceh1	0.145101	0.346786	0.31	0.283	1	0.02065	0.45095	0.351	0.32	1	0.0384344	0.409084	0.37	0.349	1	0.181745	0.444215	0.289	0.299	1	0.000285061	0.53196	0.358	0.297	1	0.0802396	0.317764	0.364	0.359	1	0.243084	0.255595	0.333	0.355	1	3.68016e-06	0.557084	0.437	0.387	0.0748729	0.243084	2.94409e-05
Bmpr2	0.154806	0.545819	0.397	0.413	1	0.438178	0.288208	0.386	0.446	1	0.0388314	0.387449	0.469	0.492	1	0.0767455	0.477779	0.389	0.443	1	0.00385337	0.409521	0.439	0.443	1	0.119018	0.316708	0.418	0.468	1	0.00113563	0.421877	0.514	0.516	1	2.18555e-07	0.475355	0.535	0.506	0.0044465	0.438178	1.74844e-06
Clptm1	0.0093875	0.634217	0.431	0.372	1	0.0134463	0.413536	0.395	0.368	1	0.00153945	0.517409	0.457	0.398	1	0.143495	0.482919	0.309	0.319	1	0.164921	0.267315	0.324	0.328	1	0.497644	0.315619	0.336	0.39	1	8.51508e-06	0.599397	0.476	0.388	0.173239	1.52453e-06	0.480952	0.488	0.457	0.0310166	0.497644	1.21962e-05
Podxl2	1.3762e-05	0.577906	0.707	0.653	0.279988	9.0371e-05	0.416879	0.675	0.738	1	3.72613e-08	0.487736	0.778	0.763	0.000758081	0.000280991	0.387117	0.617	0.697	1	0.00159657	0.309572	0.624	0.684	1	6.60007e-05	0.312456	0.736	0.775	1	2.09359e-13	0.61893	0.829	0.754	4.25942e-09	3.07201e-11	0.361922	0.775	0.8	6.25e-07	0.00159657	1.67488e-12
Endod1	0.00804704	0.642529	0.379	0.302	1	0.0326536	0.421808	0.395	0.394	1	4.9378e-08	0.685149	0.556	0.403	0.0010046	0.56606	0.373699	0.302	0.354	1	2.16047e-11	0.651437	0.497	0.352	4.39548e-07	0.0303122	0.312419	0.436	0.435	1	0.000490928	0.446146	0.486	0.436	1	0.0287934	0.386673	0.371	0.393	1	0.56606	1.72838e-10
Itm2c	1.44974e-07	0.488002	0.897	0.893	0.00294949	5.00561e-05	0.266249	0.895	0.907	1	5.94513e-05	0.260326	0.914	0.924	1	6.56719e-09	0.392219	0.826	0.891	0.00013361	2.98328e-12	0.370329	0.89	0.874	6.06948e-08	1.60106e-05	0.307265	0.882	0.895	0.325735	9.46504e-12	0.376745	0.981	0.921	1.92566e-07	2.15478e-22	0.460729	0.915	0.91	4.38389e-18	5.94513e-05	1.72382e-21
Sorcs1	0.90738	0.354894	0.172	0.201	1	0.530183	0.281871	0.219	0.225	1	0.0140421	0.487412	0.309	0.24	1	0.657621	0.316916	0.181	0.231	1	0.292942	0.314933	0.22	0.217	1	0.146578	0.304512	0.255	0.23	1	0.405297	0.337069	0.238	0.242	1	0.00317506	0.452576	0.282	0.238	1	0.90738	0.02512
Tmed10	0.00374893	0.493232	0.621	0.636	1	0.1401	0.300517	0.535	0.655	1	0.0227888	0.301296	0.617	0.69	1	0.0169419	0.463115	0.51	0.605	1	3.17268e-06	0.440604	0.607	0.597	0.0645481	0.00223468	0.304296	0.609	0.654	1	0.00647602	0.258893	0.619	0.671	1	0.000204562	0.277521	0.61	0.666	1	0.1401	2.53811e-05
Tecr	0.00411476	0.528885	0.638	0.686	1	9.56658e-05	0.351563	0.667	0.722	1	1.37572e-07	0.489938	0.753	0.748	0.0027989	0.0192438	0.366175	0.564	0.677	1	0.00130274	0.298141	0.624	0.682	1	4.6831e-05	0.303914	0.745	0.769	0.952777	6.63204e-07	0.344287	0.743	0.723	0.0134929	9.71466e-08	0.369833	0.685	0.738	0.00197645	0.0192438	7.77172e-07
Tmem59l	0.0457601	0.34838	0.483	0.484	1	0.0377472	0.292802	0.491	0.532	1	3.09784e-13	0.700053	0.741	0.56	6.30256e-09	0.0285146	0.452406	0.436	0.479	1	0.00270282	0.396669	0.468	0.477	1	0.00627006	0.302394	0.555	0.551	1	1.26514e-05	0.453233	0.6	0.561	0.257393	0.00800953	0.401187	0.502	0.56	1	0.0457601	2.47827e-12
Itm2b	2.53047e-07	0.607178	0.759	0.683	0.00514825	3.65033e-07	0.465827	0.737	0.737	0.0074266	4.28678e-08	0.549368	0.753	0.756	0.000872146	3.1602e-07	0.491103	0.651	0.683	0.00642943	7.69744e-08	0.441895	0.659	0.683	0.00156604	0.00119009	0.299543	0.645	0.701	1	3.39478e-10	0.51095	0.781	0.739	6.90668e-06	8.61259e-17	0.524503	0.77	0.731	1.75223e-12	0.00119009	6.89007e-16
Cd47	9.54263e-10	0.677131	0.897	0.784	1.94145e-05	2.39258e-05	0.364494	0.754	0.802	0.48677	3.24365e-10	0.58093	0.877	0.805	6.5992e-06	0.000329369	0.345228	0.698	0.808	1	1.74623e-08	0.416026	0.751	0.792	0.00035527	0.000521198	0.294721	0.764	0.797	1	3.12022e-10	0.413079	0.867	0.829	6.34809e-06	1.79848e-16	0.402598	0.864	0.865	3.65901e-12	0.000521198	1.43879e-15
Tmem33	0.000730974	0.621811	0.448	0.333	1	0.0181841	0.389885	0.395	0.372	1	0.00869381	0.576975	0.407	0.368	1	0.240468	0.394964	0.309	0.332	1	0.000151772	0.431007	0.399	0.326	1	0.389973	0.294238	0.309	0.334	1	6.13785e-06	0.494343	0.505	0.404	0.124874	2.42756e-08	0.478018	0.488	0.404	0.000493887	0.389973	1.94205e-07
St8sia4	0.0625321	0.296639	0.224	0.153	1	0.0422845	0.264126	0.219	0.165	1	0.0580458	0.37818	0.247	0.191	1	0.0858636	0.54164	0.215	0.187	1	0.00777897	0.382087	0.237	0.182	1	0.435072	0.29218	0.2	0.195	1	0.0369987	0.327128	0.257	0.204	1	1.49758e-06	0.442885	0.305	0.204	0.0304684	0.435072	1.19806e-05
Syt4	0.00204811	0.350761	0.793	0.82	1	0.000433481	0.322621	0.789	0.823	1	8.30184e-06	0.476446	0.864	0.85	0.168901	5.33357e-07	0.351875	0.805	0.856	0.0108512	3.24274e-08	0.343032	0.809	0.809	0.000659736	5.29188e-05	0.289266	0.8	0.816	1	9.08495e-09	0.437022	0.933	0.857	0.000184833	4.56613e-15	0.371685	0.897	0.857	9.28979e-11	0.00204811	3.6529e-14
Atad1	0.0219296	0.470202	0.483	0.444	1	0.00166268	0.472531	0.491	0.471	1	0.0248658	0.33148	0.506	0.519	1	0.0467038	0.362695	0.416	0.443	1	0.0145733	0.347692	0.434	0.444	1	0.0769015	0.285977	0.418	0.442	1	0.00205544	0.356082	0.524	0.502	1	1.14364e-08	0.566454	0.554	0.52	0.000232674	0.0769015	9.14914e-08
Tmem106b	0.0141597	0.58573	0.5	0.477	1	0.000953284	0.466453	0.535	0.55	1	0.00690553	0.460786	0.531	0.57	1	0.0474874	0.445262	0.443	0.512	1	4.84325e-06	0.424671	0.549	0.507	0.098536	0.0422447	0.281311	0.491	0.526	1	7.44794e-10	0.518292	0.695	0.589	1.51528e-05	3.66086e-08	0.449305	0.573	0.536	0.000744801	0.0474874	5.95835e-09
Sppl3	0.00237962	0.643005	0.466	0.377	1	0.329267	0.390916	0.333	0.375	1	7.03306e-05	0.491433	0.506	0.424	1	0.501699	0.460551	0.302	0.35	1	0.0826409	0.32539	0.347	0.35	1	0.204697	0.276016	0.364	0.391	1	0.000858356	0.45313	0.476	0.442	1	3.06109e-05	0.386223	0.493	0.472	0.622778	0.501699	0.000244861
Scg5	0.230857	0.2868	0.448	0.487	1	0.0889491	0.34214	0.465	0.544	1	0.00017436	0.487992	0.58	0.57	1	0.0249281	0.457439	0.436	0.486	1	0.0286658	0.311266	0.468	0.512	1	0.121859	0.268009	0.473	0.533	1	2.81542e-06	0.44981	0.619	0.575	0.0572797	8.71317e-12	0.470291	0.638	0.567	1.77269e-07	0.230857	6.97054e-11
Scn8a	0.486117	0.347438	0.31	0.342	1	0.897906	0.281826	0.281	0.341	1	0.127645	0.303243	0.37	0.374	1	0.910133	0.271633	0.275	0.351	1	0.123915	0.366785	0.306	0.32	1	0.280434	0.266209	0.364	0.397	1	0.0376937	0.345788	0.41	0.403	1	0.00038018	0.395226	0.455	0.453	1	0.910133	0.0030374
Rtl8a	7.55828e-16	0.790002	0.966	0.917	1.53773e-11	4.78885e-10	0.468724	0.86	0.892	9.74291e-06	6.24668e-11	0.452141	0.926	0.909	1.27089e-06	1.14963e-10	0.453687	0.826	0.874	2.33892e-06	4.00741e-11	0.377219	0.867	0.879	8.15307e-07	0.00416074	0.265381	0.827	0.891	1	6.01054e-12	0.484392	0.905	0.892	1.22285e-07	1.21896e-09	0.27671	0.873	0.879	2.47998e-05	0.00416074	6.04663e-15
B3galt2	0.00988684	0.485509	0.224	0.13	1	0.0106716	0.459222	0.228	0.162	1	0.00258295	0.515197	0.272	0.175	1	0.000398919	0.468298	0.235	0.149	1	0.00463694	0.407136	0.197	0.135	1	0.344435	0.262637	0.164	0.143	1	0.00954139	0.457887	0.238	0.171	1	0.000756278	0.43036	0.23	0.165	1	0.344435	0.0031869
Ugcg	0.00112634	0.654913	0.448	0.329	1	0.161102	0.397166	0.325	0.335	1	0.0145741	0.358579	0.395	0.347	1	0.638604	0.316063	0.282	0.323	1	0.176269	0.301181	0.318	0.329	1	0.889988	0.259642	0.282	0.341	1	0.0605783	0.403837	0.381	0.388	1	3.67513e-07	0.510068	0.484	0.425	0.00747706	0.889988	2.9401e-06
Brinp3	0.401343	0.480399	0.31	0.32	1	0.00458056	0.374655	0.412	0.345	1	0.0565566	0.362638	0.358	0.323	1	0.0338439	0.438773	0.389	0.386	1	0.00385916	0.347095	0.399	0.347	1	0.281568	0.257694	0.345	0.355	1	0.0131756	0.393805	0.4	0.359	1	0.0178247	0.384418	0.347	0.333	1	0.401343	0.0304595
Serinc3	0.00705809	0.542696	0.414	0.334	1	0.09821	0.382498	0.386	0.403	1	0.000193893	0.531558	0.506	0.429	1	0.00850189	0.500614	0.383	0.37	1	0.134733	0.314228	0.358	0.381	1	0.309979	0.251378	0.355	0.379	1	0.0197663	0.365028	0.438	0.429	1	2.43304e-07	0.460657	0.526	0.495	0.00495003	0.309979	1.94643e-06
Prkar2a	7.60576e-09	-0.676779	0.103	0.542	0.000154739	6.44347e-10	-0.374328	0.149	0.513	1.31092e-05	5.27384e-06	-0.32828	0.222	0.556	0.107296	3.85737e-16	-0.443241	0.134	0.556	7.84782e-12	4.65565e-15	-0.382675	0.127	0.488	9.47192e-11	3.49667e-06	-0.250749	0.291	0.59	0.0711397	1.20018e-09	-0.416275	0.21	0.585	2.44177e-05	1.04096e-21	-0.483152	0.117	0.513	2.11782e-17	5.27384e-06	8.32765e-21
Hdgf	2.48976e-05	-0.412032	0.19	0.538	0.506541	1.74531e-09	-0.388336	0.158	0.513	3.55084e-05	9.06844e-10	-0.470001	0.16	0.568	1.84497e-05	1.33928e-13	-0.336955	0.141	0.518	2.72477e-09	1.51575e-12	-0.38905	0.15	0.468	3.08379e-08	9.91259e-06	-0.262349	0.327	0.639	0.201672	9.29316e-06	-0.303519	0.267	0.574	0.189069	8.47113e-20	-0.528065	0.164	0.553	1.72345e-15	2.48976e-05	6.7769e-19
Trappc6b	1.04937e-05	-0.384659	0.19	0.564	0.213495	9.51936e-07	-0.254752	0.246	0.565	0.0193671	1.72448e-05	-0.317917	0.259	0.609	0.350845	1.38262e-14	-0.384796	0.161	0.558	2.81293e-10	1.0061e-11	-0.371041	0.202	0.533	2.04691e-07	4.68574e-06	-0.267163	0.327	0.635	0.0953314	1.78403e-06	-0.326496	0.295	0.606	0.0362961	5.72143e-18	-0.435336	0.174	0.549	1.16402e-13	1.72448e-05	4.57714e-17
Pak1	1.80674e-05	-0.376887	0.224	0.592	0.367581	2.65193e-08	-0.317042	0.167	0.489	0.000539535	1.257e-10	-0.559549	0.16	0.601	2.55737e-06	1.91608e-19	-0.605831	0.101	0.552	3.89827e-15	6.03864e-15	-0.415563	0.162	0.528	1.22856e-10	2.21854e-09	-0.268207	0.2	0.577	4.51361e-05	1.28224e-12	-0.544938	0.162	0.589	2.60871e-08	1.81174e-17	-0.446726	0.188	0.554	3.68599e-13	1.80674e-05	1.53287e-18
Cited2	1.71955e-06	-0.5965	0.017	0.326	0.0349842	1.93301e-07	-0.4018	0.026	0.241	0.00393271	5.42327e-08	-0.487845	0.012	0.298	0.00110336	5.48218e-10	-0.366946	0.027	0.259	1.11535e-05	5.67985e-09	-0.342259	0.046	0.245	0.000115557	5.41398e-06	-0.284399	0.045	0.239	0.110147	6.10593e-07	-0.351593	0.038	0.261	0.0124225	3.97192e-14	-0.424862	0.028	0.269	8.08088e-10	5.41398e-06	3.17754e-13
Cggbp1	0.000241376	-0.28533	0.121	0.406	1	1.88653e-09	-0.363183	0.061	0.358	3.83815e-05	8.58071e-09	-0.46091	0.049	0.389	0.000174575	1.0577e-12	-0.406377	0.054	0.362	2.15188e-08	7.27314e-15	-0.463087	0.058	0.361	1.47972e-10	1.72411e-07	-0.286079	0.109	0.389	0.00350769	1.69026e-09	-0.378383	0.086	0.411	3.43883e-05	1.42658e-13	-0.324669	0.103	0.393	2.90238e-09	0.000241376	5.81851e-14
Ppp2r2c	5.73461e-06	-0.466163	0.207	0.581	0.116671	1.25137e-08	-0.317339	0.14	0.476	0.000254591	4.66063e-07	-0.392311	0.198	0.566	0.00948205	3.29949e-17	-0.436416	0.107	0.517	6.71281e-13	7.56369e-15	-0.397767	0.145	0.507	1.53883e-10	1.8537e-06	-0.288452	0.264	0.568	0.0377135	2.1246e-06	-0.280695	0.267	0.578	0.0432251	1.5324e-15	-0.397289	0.202	0.553	3.11767e-11	5.73461e-06	2.63959e-16
Eif3k	1.3668e-09	-0.645412	0.086	0.559	2.78076e-05	2.0039e-11	-0.498076	0.184	0.584	4.07694e-07	1.91548e-12	-0.68543	0.198	0.665	3.89705e-08	7.45829e-15	-0.440017	0.195	0.614	1.51739e-10	6.07965e-16	-0.503281	0.202	0.586	1.2369e-11	1.06379e-06	-0.288508	0.364	0.682	0.0216429	2.32005e-16	-0.63477	0.133	0.62	4.72014e-12	1.34133e-14	-0.38777	0.192	0.536	2.72893e-10	1.06379e-06	1.85604e-15
Cct2	6.85914e-06	-0.464584	0.086	0.399	0.139549	7.89554e-08	-0.27421	0.123	0.424	0.00160635	3.22073e-07	-0.332554	0.148	0.501	0.00655258	2.61516e-13	-0.380244	0.081	0.415	5.32054e-09	7.8848e-11	-0.301192	0.121	0.398	1.60416e-06	1.70107e-07	-0.289814	0.191	0.499	0.00346082	3.11049e-07	-0.28781	0.143	0.456	0.0063283	4.56115e-17	-0.401166	0.085	0.408	9.27965e-13	6.85914e-06	3.64892e-16
Pura	3.18745e-08	-0.519843	0.31	0.77	0.000648487	3.59732e-12	-0.577184	0.281	0.658	7.31874e-08	0.000168346	-0.296573	0.481	0.738	1	1.87347e-20	-0.648031	0.268	0.72	3.81157e-16	4.21794e-11	-0.408763	0.353	0.684	8.58139e-07	9.63235e-05	-0.290127	0.527	0.744	1	8.53119e-14	-0.590537	0.362	0.762	1.73567e-09	5.89693e-20	-0.520705	0.399	0.748	1.19973e-15	0.000168346	1.49877e-19
Ppp3r1	0.000573132	-0.255741	0.379	0.714	1	5.50163e-10	-0.396938	0.237	0.619	1.11931e-05	0.000173444	-0.300402	0.432	0.739	1	3.28587e-10	-0.359376	0.289	0.672	6.68511e-06	1.8308e-10	-0.350428	0.318	0.654	3.72476e-06	4.54994e-06	-0.291152	0.445	0.708	0.0925685	1.54064e-06	-0.311559	0.41	0.725	0.0313444	5.15099e-14	-0.435276	0.352	0.683	1.04797e-09	0.000573132	4.12079e-13
Ppp3ca	0.000118762	-0.434838	0.431	0.749	1	1.97082e-05	-0.351307	0.491	0.705	0.400963	2.47204e-05	-0.39151	0.556	0.796	0.502937	1.59702e-07	-0.328464	0.463	0.757	0.00324913	9.91816e-10	-0.418034	0.434	0.716	2.01785e-05	1.87952e-05	-0.291261	0.518	0.773	0.382388	0.000102007	-0.286465	0.59	0.788	1	8.70336e-07	-0.27505	0.484	0.719	0.017707	0.000118762	7.93453e-09
Asb4	0.00871167	-0.449845	0.103	0.259	1	9.3088e-07	-0.469942	0.035	0.238	0.0189388	0.000318213	-0.352614	0.062	0.244	1	3.40165e-05	-0.29876	0.054	0.193	0.692065	2.36052e-06	-0.349272	0.058	0.212	0.0480247	0.000601117	-0.291621	0.082	0.228	1	0.000299486	-0.348864	0.095	0.257	1	4.39172e-09	-0.425268	0.07	0.255	8.93494e-05	0.00871167	3.51337e-08
Jund	7.60938e-06	-0.428835	0.086	0.417	0.154813	3.89353e-09	-0.329397	0.053	0.339	7.92138e-05	2.16639e-08	-0.444231	0.062	0.393	0.000440752	9.28111e-11	-0.291087	0.054	0.324	1.88824e-06	1.11337e-10	-0.319416	0.075	0.328	2.26514e-06	1.28907e-08	-0.291707	0.136	0.46	0.00026226	9.01372e-07	-0.302382	0.105	0.367	0.0183384	8.69383e-21	-0.545467	0.136	0.523	1.76876e-16	7.60938e-06	6.95506e-20
Rab11b	1.42943e-07	-0.473668	0.086	0.473	0.00290817	4.21217e-09	-0.29357	0.105	0.434	8.56965e-05	1.15834e-07	-0.384017	0.148	0.505	0.00235664	1.76943e-14	-0.392553	0.087	0.441	3.5999e-10	5.19687e-11	-0.320523	0.127	0.421	1.0573e-06	1.92559e-08	-0.293416	0.173	0.512	0.000391761	1.83859e-09	-0.439664	0.143	0.488	3.74062e-05	1.83465e-14	-0.331234	0.146	0.475	3.7326e-10	1.42943e-07	1.41554e-13
Spop	7.12459e-05	-0.391169	0.172	0.485	1	1.23415e-08	-0.369146	0.202	0.56	0.000251088	2.55963e-05	-0.316762	0.259	0.592	0.520756	3.54024e-15	-0.432315	0.141	0.558	7.20263e-11	9.19726e-10	-0.304331	0.208	0.522	1.87118e-05	6.31824e-07	-0.297173	0.282	0.605	0.0128545	3.0803e-05	-0.253768	0.286	0.597	0.626687	1.73377e-13	-0.350529	0.164	0.488	3.52736e-09	7.12459e-05	2.8322e-14
Fkbp1a	2.27426e-08	-0.650253	0.328	0.759	0.000462699	1.0372e-06	-0.375733	0.36	0.676	0.0211017	5.39441e-09	-0.465255	0.358	0.753	0.000109749	3.06824e-13	-0.447435	0.268	0.683	6.24233e-09	2.43643e-12	-0.458626	0.306	0.662	4.95692e-08	3.93791e-07	-0.297701	0.418	0.739	0.00801167	1.18026e-10	-0.525782	0.362	0.735	2.40124e-06	9.80783e-21	-0.524485	0.319	0.707	1.9954e-16	1.0372e-06	7.84626e-20
Fis1	6.2155e-06	-0.365158	0.241	0.662	0.126454	3.68761e-09	-0.392621	0.246	0.615	7.50245e-05	1.62319e-09	-0.52194	0.284	0.699	3.30237e-05	1.19713e-14	-0.449237	0.201	0.63	2.43556e-10	1.26716e-09	-0.318773	0.301	0.621	2.57803e-05	1.04272e-07	-0.298785	0.336	0.691	0.00212142	2.24918e-10	-0.483658	0.276	0.662	4.57596e-06	3.2935e-16	-0.4294	0.258	0.637	6.70063e-12	6.2155e-06	2.6348e-15
Nol7	5.90189e-06	-0.428534	0.138	0.501	0.120074	2.09007e-10	-0.392607	0.105	0.458	4.25226e-06	8.26579e-08	-0.401734	0.16	0.518	0.00168167	6.81095e-11	-0.274539	0.141	0.479	1.38569e-06	7.82008e-13	-0.388172	0.127	0.453	1.59099e-08	6.69432e-09	-0.299374	0.155	0.506	0.000136196	1.91876e-07	-0.306932	0.162	0.483	0.00390371	9.03728e-15	-0.362805	0.108	0.417	1.83863e-10	5.90189e-06	7.22982e-14
Efhd2	0.000139407	-0.37073	0.121	0.407	1	1.93508e-09	-0.398745	0.079	0.385	3.93691e-05	3.76982e-08	-0.403762	0.099	0.453	0.00076697	2.45417e-10	-0.326187	0.101	0.392	4.99301e-06	1.19601e-13	-0.436179	0.087	0.391	2.43329e-09	2.82649e-08	-0.309742	0.118	0.424	0.000575049	1.21085e-09	-0.384667	0.105	0.44	2.46348e-05	1.78035e-12	-0.293421	0.099	0.369	3.62212e-08	0.000139407	9.56811e-13
Hsbp1	5.73528e-09	-0.605575	0.172	0.641	0.000116684	4.83114e-08	-0.303358	0.246	0.604	0.000982895	0.000258307	-0.267962	0.346	0.658	1	3.38349e-13	-0.415115	0.188	0.586	6.88371e-09	6.4075e-12	-0.353266	0.214	0.55	1.30361e-07	8.78476e-07	-0.3159	0.345	0.667	0.0178726	3.74457e-09	-0.437204	0.267	0.632	7.61832e-05	1.00212e-14	-0.366625	0.235	0.591	2.03881e-10	0.000258307	8.01693e-14
Calm3	0.000264176	-0.312435	0.517	0.799	1	4.28335e-09	-0.455717	0.342	0.696	8.71448e-05	3.23091e-08	-0.490027	0.494	0.799	0.000657328	3.52353e-19	-0.651429	0.235	0.711	7.16861e-15	4.76643e-10	-0.371621	0.41	0.717	9.6973e-06	1.7249e-06	-0.323213	0.609	0.797	0.035093	1.79856e-07	-0.3789	0.533	0.773	0.00365917	6.86551e-15	-0.446464	0.512	0.738	1.39679e-10	0.000264176	2.81882e-18
BC029722	1.20726e-05	-0.374665	0.224	0.602	0.245617	5.21007e-09	-0.333506	0.175	0.537	0.000105999	2.66958e-07	-0.331738	0.247	0.644	0.00543126	1.13614e-10	-0.312513	0.195	0.554	2.31148e-06	1.12865e-09	-0.29574	0.22	0.531	2.29624e-05	2.44907e-06	-0.32395	0.327	0.635	0.0498264	8.70047e-09	-0.360184	0.229	0.615	0.000177011	1.35823e-17	-0.41633	0.16	0.534	2.76333e-13	1.20726e-05	1.08659e-16
Atp6v1g2	3.72352e-07	-0.581744	0.224	0.633	0.00757551	1.50059e-06	-0.254301	0.228	0.542	0.0305296	4.90426e-13	-0.725787	0.173	0.651	9.97772e-09	1.74868e-14	-0.473428	0.174	0.575	3.55768e-10	9.80629e-11	-0.380763	0.243	0.57	1.99509e-06	1.02979e-06	-0.326474	0.364	0.666	0.020951	2.68261e-10	-0.49777	0.248	0.62	5.45776e-06	5.10192e-09	-0.304076	0.343	0.619	0.000103799	1.50059e-06	1.39894e-13
Hspe1	1.78587e-09	-0.682551	0.155	0.63	3.63335e-05	8.14464e-09	-0.392786	0.254	0.616	0.000165703	3.8276e-08	-0.439725	0.272	0.681	0.000778724	4.23262e-15	-0.526012	0.195	0.605	8.61126e-11	3.86189e-15	-0.519488	0.214	0.588	7.85702e-11	4.77724e-07	-0.326854	0.355	0.678	0.0097193	3.47243e-14	-0.608828	0.2	0.646	7.06465e-10	2.41907e-16	-0.410962	0.202	0.582	4.92159e-12	4.77724e-07	1.93525e-15
Pja1	2.70269e-05	-0.380269	0.138	0.475	0.549862	2.6264e-10	-0.401855	0.088	0.425	5.34341e-06	2.69883e-09	-0.492301	0.111	0.498	5.49077e-05	1.16326e-16	-0.449278	0.074	0.462	2.36665e-12	4.18875e-11	-0.332021	0.121	0.411	8.52201e-07	3.42292e-09	-0.333471	0.127	0.475	6.96393e-05	2.3617e-09	-0.352724	0.133	0.483	4.80489e-05	3.75433e-13	-0.292524	0.122	0.42	7.63819e-09	2.70269e-05	9.30605e-16
Grb2	1.27651e-05	-0.378603	0.121	0.459	0.259705	1.18831e-13	-0.52059	0.07	0.466	2.41763e-09	0.000138412	-0.252874	0.235	0.523	1	2.54318e-13	-0.338417	0.114	0.474	5.17411e-09	2.66348e-12	-0.356233	0.127	0.444	5.41886e-08	1.53646e-09	-0.334278	0.182	0.558	3.12592e-05	1.61971e-11	-0.479498	0.124	0.522	3.2953e-07	9.23981e-16	-0.345229	0.117	0.45	1.87984e-11	0.000138412	7.39185e-15
Ctbp1	2.16595e-05	-0.389976	0.121	0.445	0.440663	1.94629e-08	-0.328932	0.105	0.414	0.000395973	9.46299e-08	-0.423416	0.136	0.487	0.00192525	1.30756e-14	-0.455692	0.074	0.422	2.66022e-10	5.43866e-11	-0.298508	0.121	0.413	1.1065e-06	2.56516e-07	-0.334416	0.182	0.49	0.00521882	9.43988e-08	-0.304389	0.162	0.485	0.00192054	2.12546e-11	-0.29612	0.164	0.454	4.32425e-07	2.16595e-05	1.04605e-13
Myl12b	3.56834e-06	-0.445811	0.069	0.397	0.0725979	1.95615e-09	-0.355019	0.07	0.373	3.97979e-05	3.95119e-10	-0.488044	0.062	0.452	8.0387e-06	6.03558e-13	-0.367712	0.074	0.4	1.22794e-08	2.22368e-11	-0.316152	0.092	0.368	4.52408e-07	2.86217e-09	-0.33628	0.118	0.445	5.82308e-05	4.06777e-09	-0.374109	0.105	0.434	8.27588e-05	4.3086e-15	-0.342308	0.089	0.393	8.76584e-11	3.56834e-06	3.44688e-14
Eif4b	5.19153e-06	-0.332178	0.086	0.434	0.105622	1.05977e-07	-0.287261	0.14	0.443	0.00215611	2.73691e-07	-0.362487	0.173	0.542	0.00556825	8.2588e-15	-0.416523	0.087	0.462	1.68025e-10	1.86613e-12	-0.286295	0.127	0.441	3.79665e-08	5.31231e-08	-0.337534	0.227	0.566	0.00108079	6.2829e-08	-0.342443	0.19	0.522	0.00127826	5.77352e-15	-0.379415	0.15	0.486	1.17462e-10	5.19153e-06	4.61882e-14
Sdcbp	1.33263e-06	-0.612788	0.138	0.488	0.0271124	9.58332e-12	-0.512001	0.079	0.439	1.94973e-07	2.60921e-10	-0.591748	0.111	0.52	5.30843e-06	2.40093e-13	-0.470429	0.121	0.471	4.88469e-09	6.91879e-12	-0.417875	0.139	0.439	1.40763e-07	4.92418e-08	-0.342348	0.164	0.47	0.00100182	2.88415e-06	-0.355407	0.21	0.493	0.058678	3.52235e-16	-0.396217	0.122	0.456	7.16621e-12	2.88415e-06	2.81788e-15
Rgs17	1.89063e-05	-0.436986	0.259	0.618	0.384649	5.64795e-07	-0.337057	0.263	0.569	0.0114908	3.69224e-06	-0.401682	0.346	0.665	0.0751186	7.49952e-17	-0.514012	0.181	0.618	1.52578e-12	1.06119e-08	-0.344479	0.283	0.576	0.000215899	4.75122e-07	-0.342847	0.318	0.629	0.00966635	3.00534e-06	-0.339358	0.333	0.644	0.0611437	1.08766e-13	-0.38263	0.225	0.562	2.21285e-09	1.89063e-05	5.99962e-16
Sec61b	2.5086e-05	-0.354876	0.138	0.475	0.510374	1.06253e-10	-0.466231	0.096	0.443	2.16171e-06	4.49253e-08	-0.448013	0.123	0.485	0.000914005	7.67087e-18	-0.516679	0.054	0.452	1.56064e-13	1.4704e-11	-0.323934	0.116	0.408	2.99153e-07	1.94958e-09	-0.34334	0.145	0.494	3.96642e-05	9.33434e-12	-0.480317	0.105	0.503	1.89907e-07	3.95591e-12	-0.321354	0.141	0.424	8.04829e-08	2.5086e-05	6.1367e-17
Tuba1b	2.80208e-05	-0.441371	0.362	0.705	0.570083	3.48584e-09	-0.514562	0.316	0.645	7.09195e-05	1.84784e-07	-0.449367	0.37	0.725	0.00375943	1.83485e-15	-0.507465	0.255	0.676	3.733e-11	3.63919e-10	-0.394595	0.347	0.654	7.40393e-06	5.55166e-08	-0.34395	0.455	0.747	0.00112949	7.55555e-10	-0.495886	0.333	0.693	1.53718e-05	1.88932e-14	-0.402323	0.244	0.592	3.84382e-10	2.80208e-05	1.46788e-14
Chd3	0.00046364	-0.338287	0.466	0.763	1	5.3548e-14	-0.663232	0.298	0.702	1.08943e-09	2.58694e-13	-0.726939	0.37	0.775	5.26314e-09	9.65827e-15	-0.486687	0.322	0.749	1.96497e-10	1.97284e-15	-0.501982	0.364	0.72	4.01374e-11	8.55487e-08	-0.34747	0.482	0.765	0.00174049	2.22034e-13	-0.588609	0.39	0.771	4.51728e-09	3.16179e-19	-0.499251	0.352	0.723	6.43267e-15	0.00046364	2.52943e-18
Eif1b	4.78082e-09	-0.666012	0.224	0.697	9.72657e-05	2.74925e-11	-0.556442	0.246	0.634	5.59335e-07	1.3828e-08	-0.501217	0.296	0.708	0.00028133	9.72551e-17	-0.509194	0.188	0.646	1.97865e-12	4.86125e-12	-0.359341	0.237	0.599	9.89022e-08	3.33928e-07	-0.349633	0.391	0.716	0.00679376	2.32471e-13	-0.604383	0.267	0.702	4.72961e-09	2.28363e-20	-0.530491	0.202	0.61	4.64605e-16	3.33928e-07	1.82691e-19
Chp1	3.00913e-05	-0.315113	0.103	0.414	0.612207	1.35754e-10	-0.413269	0.088	0.43	2.76192e-06	2.23838e-07	-0.33305	0.148	0.512	0.00455398	1.69494e-12	-0.326739	0.101	0.437	3.44835e-08	4.63639e-17	-0.509262	0.075	0.427	9.43273e-13	1.83077e-08	-0.350577	0.191	0.529	0.00037247	2.55357e-13	-0.539545	0.095	0.504	5.19523e-09	1.25923e-17	-0.439609	0.08	0.405	2.5619e-13	3.00913e-05	1.00738e-16
Pdap1	1.33562e-06	-0.516705	0.19	0.587	0.0271733	3.25135e-08	-0.309721	0.175	0.51	0.000661488	3.47136e-07	-0.355951	0.185	0.562	0.00706249	2.57711e-16	-0.524707	0.134	0.54	5.24313e-12	1.30179e-16	-0.517725	0.145	0.519	2.6485e-12	5.23111e-10	-0.352947	0.2	0.58	1.06427e-05	7.97948e-10	-0.435597	0.181	0.563	1.62343e-05	7.75128e-22	-0.529614	0.108	0.497	1.577e-17	1.33562e-06	6.20102e-21
Elavl3	1.25087e-06	-0.496285	0.362	0.74	0.025449	4.231e-10	-0.450712	0.298	0.69	8.60798e-06	5.06634e-07	-0.437658	0.395	0.726	0.0103075	1.48017e-16	-0.570036	0.248	0.691	3.01141e-12	8.33023e-10	-0.352151	0.341	0.665	1.69479e-05	3.56397e-08	-0.353189	0.436	0.761	0.000725089	3.20499e-13	-0.606614	0.381	0.744	6.52055e-09	1.38525e-22	-0.585	0.286	0.696	2.81829e-18	1.25087e-06	1.1082e-21
Gpx1	1.8834e-06	-0.478148	0.069	0.404	0.0383178	4.70034e-09	-0.347951	0.07	0.363	9.56283e-05	3.64234e-07	-0.325919	0.111	0.442	0.00741034	2.76059e-13	-0.409193	0.054	0.37	5.61642e-09	3.99626e-10	-0.31419	0.098	0.353	8.1304e-06	7.86582e-09	-0.356288	0.136	0.449	0.00016003	3.75933e-09	-0.349297	0.086	0.409	7.64835e-05	2.24762e-15	-0.37472	0.089	0.394	4.57278e-11	1.8834e-06	1.7981e-14
Clta	7.32002e-07	-0.510348	0.155	0.563	0.0148926	7.75136e-11	-0.466112	0.167	0.552	1.57701e-06	2.70339e-06	-0.398954	0.321	0.669	0.0550005	1.6322e-16	-0.50897	0.161	0.587	3.32072e-12	5.28018e-17	-0.524975	0.173	0.566	1.07425e-12	5.03742e-08	-0.357721	0.3	0.643	0.00102486	1.07303e-08	-0.386281	0.238	0.605	0.000218307	8.54346e-13	-0.352147	0.235	0.565	1.73817e-08	2.70339e-06	4.22415e-16
Taok3	4.30725e-09	-0.665986	0.121	0.58	8.76311e-05	3.50204e-15	-0.606475	0.088	0.52	7.1249e-11	2.71693e-10	-0.565546	0.16	0.583	5.52759e-06	1.78658e-14	-0.418561	0.154	0.552	3.6348e-10	5.33258e-11	-0.347757	0.179	0.491	1.08491e-06	1.12448e-08	-0.358927	0.218	0.574	0.000228776	3.54609e-14	-0.588021	0.124	0.569	7.21451e-10	9.01698e-26	-0.604827	0.08	0.499	1.8345e-21	1.12448e-08	7.21358e-25
Atp6v1g1	2.78502e-06	-0.403141	0.172	0.586	0.0566613	6.27567e-11	-0.436068	0.158	0.548	1.27678e-06	8.21545e-09	-0.498382	0.185	0.595	0.000167143	8.71153e-16	-0.442663	0.121	0.529	1.77236e-11	5.60012e-10	-0.354246	0.225	0.534	1.13934e-05	2.72913e-09	-0.360333	0.227	0.596	5.55241e-05	1.30663e-11	-0.495306	0.162	0.575	2.65833e-07	2.43494e-22	-0.554579	0.127	0.53	4.95389e-18	2.78502e-06	1.94795e-21
Lsm6	2.44893e-06	-0.438734	0.103	0.455	0.0498235	6.04584e-14	-0.560555	0.07	0.468	1.23003e-09	1.41269e-09	-0.486851	0.123	0.53	2.87412e-05	9.68913e-10	-0.255057	0.161	0.493	1.97125e-05	5.45339e-12	-0.304397	0.15	0.469	1.10949e-07	4.0827e-10	-0.365453	0.164	0.531	8.30625e-06	1.12694e-08	-0.334623	0.162	0.513	0.000229277	1.73905e-15	-0.353846	0.103	0.416	3.5381e-11	2.44893e-06	1.39124e-14
Ina	1.95937e-07	-0.589212	0.172	0.602	0.00398633	5.6461e-09	-0.327026	0.184	0.551	0.00011487	0.00091464	-0.29002	0.358	0.623	1	4.01429e-15	-0.488223	0.168	0.582	8.16707e-11	2.57064e-12	-0.343737	0.202	0.546	5.22997e-08	1.77173e-07	-0.366695	0.355	0.66	0.00360458	5.1454e-17	-0.761617	0.171	0.642	1.04683e-12	5.50347e-27	-0.701248	0.155	0.592	1.11968e-22	0.00091464	4.40277e-26
Capzb	3.94569e-05	-0.369713	0.121	0.436	0.80275	2.25293e-11	-0.464399	0.053	0.388	4.58358e-07	1.46796e-07	-0.417124	0.123	0.467	0.00298656	3.66038e-13	-0.391206	0.074	0.404	7.44705e-09	4.33977e-12	-0.384027	0.087	0.368	8.82926e-08	1.39662e-11	-0.366982	0.1	0.476	2.84141e-07	8.67283e-10	-0.377876	0.105	0.453	1.76449e-05	4.11872e-17	-0.415102	0.089	0.416	8.37954e-13	3.94569e-05	3.29498e-16
Nap1l1	3.69084e-06	-0.458729	0.241	0.618	0.0750901	5.60358e-13	-0.514286	0.184	0.6	1.14005e-08	2.2931e-09	-0.521415	0.247	0.674	4.6653e-05	2.50993e-10	-0.321153	0.248	0.635	5.10645e-06	6.8951e-13	-0.361053	0.22	0.589	1.40281e-08	3.50202e-08	-0.367337	0.327	0.667	0.000712487	2.19784e-12	-0.562907	0.219	0.63	4.47151e-08	9.38634e-14	-0.366219	0.235	0.579	1.90965e-09	3.69084e-06	7.50907e-13
St13	3.10459e-06	-0.446515	0.259	0.649	0.0631629	1.83332e-08	-0.453215	0.246	0.582	0.00037299	8.5539e-09	-0.466866	0.21	0.615	0.000174029	1.04808e-07	-0.264308	0.295	0.615	0.00213232	3.8127e-09	-0.301548	0.295	0.597	7.75693e-05	5.34974e-08	-0.370012	0.3	0.664	0.0010884	2.97058e-08	-0.429642	0.305	0.653	0.000604364	3.14761e-18	-0.524048	0.3	0.675	6.40381e-14	3.10459e-06	2.51809e-17
Smdt1	4.96488e-07	-0.451106	0.259	0.674	0.0101011	3.32926e-14	-0.555429	0.211	0.652	6.77338e-10	9.68862e-07	-0.392896	0.358	0.724	0.0197115	6.21733e-16	-0.501879	0.228	0.68	1.26492e-11	3.12881e-11	-0.356684	0.312	0.644	6.36556e-07	1.03092e-07	-0.37084	0.364	0.713	0.00209741	6.71113e-11	-0.505106	0.305	0.7	1.36538e-06	8.61566e-12	-0.346399	0.31	0.629	1.75286e-07	9.68862e-07	4.97386e-15
Akr1a1	8.98335e-07	-0.515299	0.241	0.655	0.0182766	2.07222e-08	-0.362247	0.246	0.6	0.000421593	1.63502e-11	-0.627276	0.247	0.678	3.32645e-07	3.14264e-13	-0.411831	0.208	0.614	6.3937e-09	2.35073e-13	-0.432933	0.22	0.591	4.78255e-09	9.10563e-09	-0.371062	0.345	0.704	0.000185254	1.87415e-11	-0.532697	0.248	0.648	3.81295e-07	9.95046e-19	-0.45654	0.192	0.581	2.02442e-14	8.98335e-07	7.96037e-18
Atp6v1e1	0.000445945	-0.259754	0.172	0.48	1	7.65781e-10	-0.304969	0.079	0.408	1.55798e-05	7.12951e-09	-0.468585	0.111	0.49	0.00014505	1.18806e-13	-0.348464	0.074	0.421	2.41711e-09	1.5528e-12	-0.342018	0.104	0.41	3.15917e-08	1.92523e-08	-0.372191	0.155	0.482	0.000391688	8.16792e-09	-0.320503	0.133	0.475	0.000166176	1.26753e-12	-0.332511	0.164	0.47	2.57879e-08	0.000445945	9.50449e-13
Pafah1b1	3.065e-07	-0.513013	0.293	0.767	0.00623575	2.38265e-07	-0.33742	0.342	0.672	0.00484749	6.75914e-07	-0.385273	0.395	0.76	0.0137515	9.95672e-15	-0.445166	0.295	0.724	2.02569e-10	1.74001e-14	-0.494171	0.335	0.685	3.54006e-10	4.89016e-08	-0.372431	0.409	0.756	0.000994903	4.72466e-07	-0.346111	0.514	0.77	0.00961232	1.93832e-22	-0.58116	0.324	0.712	3.94352e-18	6.75914e-07	1.55066e-21
Map1b	2.14501e-10	-0.716324	0.448	0.821	4.36403e-06	6.69058e-10	-0.468944	0.509	0.783	1.3612e-05	9.1205e-09	-0.446307	0.716	0.876	0.000185557	7.94549e-18	-0.578811	0.443	0.824	1.61651e-13	4.73758e-19	-0.549855	0.514	0.791	9.63861e-15	1.10067e-09	-0.372961	0.664	0.879	2.23932e-05	2.99801e-12	-0.492106	0.638	0.861	6.09945e-08	8.19894e-24	-0.560859	0.54	0.814	1.66807e-19	9.1205e-09	6.55915e-23
Serbp1	9.78823e-05	-0.328743	0.259	0.626	1	9.55184e-07	-0.345844	0.263	0.578	0.0194332	4.06286e-08	-0.474731	0.259	0.651	0.000826589	2.69484e-15	-0.489002	0.201	0.613	5.48266e-11	1.01833e-11	-0.356022	0.237	0.578	2.07178e-07	6.46452e-09	-0.373139	0.273	0.649	0.000131521	1.37629e-08	-0.425964	0.276	0.635	0.000280005	3.43425e-22	-0.522813	0.174	0.593	6.98697e-18	9.78823e-05	2.7474e-21
Mllt11	1.68075e-12	-0.819945	0.259	0.791	3.41949e-08	8.60555e-06	-0.271524	0.36	0.687	0.17508	3.75812e-12	-0.656503	0.383	0.789	7.6459e-08	3.06756e-12	-0.437601	0.315	0.7	6.24095e-08	2.89231e-14	-0.436753	0.312	0.68	5.8844e-10	9.83394e-08	-0.374419	0.545	0.786	0.00200071	3.52086e-11	-0.514222	0.429	0.775	7.16319e-07	1.60417e-28	-0.695656	0.315	0.724	3.26369e-24	8.60555e-06	1.28334e-27
Tcp1	2.83263e-07	-0.514825	0.069	0.435	0.00576299	8.0789e-13	-0.512988	0.123	0.53	1.64365e-08	2.02763e-09	-0.490685	0.173	0.597	4.1252e-05	3.82883e-18	-0.543905	0.107	0.536	7.78975e-14	6.28997e-15	-0.383546	0.15	0.51	1.2797e-10	8.72878e-10	-0.375623	0.236	0.624	1.77587e-05	2.03409e-10	-0.440045	0.181	0.56	4.13835e-06	8.68337e-17	-0.406094	0.122	0.461	1.76663e-12	2.83263e-07	3.06306e-17
Morf4l1	6.27483e-08	-0.56411	0.534	0.857	0.00127661	8.24981e-13	-0.558341	0.447	0.786	1.67842e-08	5.84676e-10	-0.486713	0.568	0.852	1.18952e-05	2.59783e-20	-0.618771	0.463	0.803	5.28528e-16	2.79411e-15	-0.450986	0.538	0.803	5.68461e-11	1.75111e-10	-0.375806	0.655	0.836	3.56263e-06	2.44834e-11	-0.464122	0.695	0.84	4.98115e-07	6.30997e-25	-0.564143	0.507	0.812	1.28376e-20	6.27483e-08	5.04798e-24
Smim10l1	1.60829e-05	-0.443887	0.293	0.68	0.327207	7.36547e-09	-0.415672	0.289	0.649	0.00014985	0.00367012	-0.251852	0.432	0.697	1	3.53876e-13	-0.332204	0.221	0.647	7.1996e-09	2.56056e-15	-0.4848	0.231	0.627	5.20946e-11	4.12494e-08	-0.378242	0.373	0.717	0.000839218	1.95146e-05	-0.280401	0.39	0.688	0.397024	8.49647e-20	-0.492312	0.183	0.577	1.72861e-15	0.00367012	6.79718e-19
Hnrnpc	2.60335e-07	-0.529484	0.138	0.538	0.00529652	2.16642e-07	-0.250065	0.158	0.472	0.00440758	8.18671e-11	-0.565847	0.099	0.517	1.66559e-06	5.44177e-11	-0.30169	0.128	0.454	1.10713e-06	1.17847e-11	-0.354786	0.139	0.438	2.39759e-07	2.96486e-09	-0.378412	0.155	0.49	6.03201e-05	5.28543e-09	-0.407304	0.143	0.487	0.000107532	3.51866e-15	-0.320232	0.122	0.45	7.15871e-11	2.60335e-07	2.81493e-14
Oaz1	1.25944e-08	-0.521507	0.741	0.915	0.000256233	4.27821e-24	-0.792298	0.57	0.866	8.70403e-20	4.79992e-13	-0.537368	0.704	0.893	9.76544e-09	1.18923e-19	-0.555166	0.604	0.852	2.4195e-15	7.6166e-21	-0.552978	0.584	0.845	1.5496e-16	8.79623e-12	-0.378624	0.855	0.909	1.78959e-07	2.9637e-20	-0.65557	0.705	0.877	6.02964e-16	3.44959e-38	-0.690988	0.638	0.872	7.01818e-34	1.25944e-08	2.75967e-37
Rack1	1.80028e-05	-0.314455	0.172	0.539	0.366268	5.58108e-07	-0.341088	0.263	0.587	0.0113547	5.64512e-10	-0.534495	0.235	0.672	1.1485e-05	7.88498e-17	-0.500661	0.161	0.603	1.6042e-12	1.37171e-10	-0.35738	0.243	0.57	2.79075e-06	1.49022e-08	-0.379842	0.282	0.661	0.000303185	1.5333e-06	-0.324038	0.295	0.622	0.031195	6.83018e-15	-0.373959	0.164	0.502	1.3896e-10	1.80028e-05	6.30799e-16
Wbp11	8.65673e-09	-0.650994	0.052	0.471	0.000176121	9.9324e-12	-0.487347	0.053	0.392	2.02075e-07	4.52507e-08	-0.407678	0.099	0.443	0.000920625	2.39717e-14	-0.43146	0.081	0.426	4.87705e-10	6.99639e-20	-0.581604	0.058	0.431	1.42342e-15	3.14361e-10	-0.380971	0.136	0.492	6.39567e-06	1.5256e-12	-0.557008	0.067	0.445	3.10383e-08	1.64835e-20	-0.502762	0.07	0.423	3.35356e-16	4.52507e-08	1.31868e-19
Tspyl1	4.68615e-08	-0.608241	0.138	0.578	0.000953397	3.9591e-10	-0.434957	0.158	0.53	8.05479e-06	2.93783e-07	-0.387913	0.235	0.611	0.00597701	4.56089e-19	-0.577919	0.121	0.57	9.27913e-15	4.0951e-09	-0.279615	0.231	0.542	8.33148e-05	1.9284e-09	-0.385528	0.255	0.622	3.92333e-05	1.27638e-10	-0.49385	0.21	0.611	2.5968e-06	5.64236e-23	-0.562809	0.169	0.587	1.14794e-18	2.93783e-07	4.51389e-22
Tcf25	3.52638e-05	-0.407618	0.345	0.728	0.717442	1.23596e-13	-0.62562	0.281	0.677	2.51457e-09	9.63802e-08	-0.45132	0.432	0.771	0.00196086	1.37194e-16	-0.551367	0.289	0.719	2.7912e-12	9.65961e-10	-0.365085	0.358	0.67	1.96525e-05	9.86166e-08	-0.387345	0.509	0.759	0.00200635	5.39993e-10	-0.46899	0.448	0.759	1.09862e-05	2.95417e-16	-0.464547	0.394	0.726	6.01025e-12	3.52638e-05	1.09755e-15
Rpl7a	1.52119e-12	-0.907107	0.207	0.746	3.09486e-08	1.35521e-15	-0.684031	0.298	0.729	2.75717e-11	7.22591e-14	-0.709831	0.444	0.811	1.47011e-09	3.24168e-23	-0.774284	0.268	0.75	6.59519e-19	2.35699e-22	-0.702425	0.324	0.722	4.7953e-18	5.56623e-08	-0.387808	0.618	0.8	0.00113245	1.45148e-15	-0.685721	0.39	0.769	2.95304e-11	3.91422e-26	-0.703959	0.249	0.677	7.96349e-22	5.56623e-08	3.13138e-25
Hpcal4	0.000269459	-0.371552	0.172	0.45	1	5.63895e-12	-0.4962	0.053	0.399	1.14725e-07	6.12654e-08	-0.421854	0.123	0.486	0.00124644	1.23894e-12	-0.41741	0.087	0.41	2.52062e-08	1.45216e-11	-0.372365	0.104	0.388	2.95443e-07	3.11689e-08	-0.388156	0.136	0.442	0.00063413	3.06813e-05	-0.267067	0.21	0.471	0.624211	1.89546e-17	-0.444263	0.094	0.425	3.85632e-13	0.000269459	1.51637e-16
Rasgrp1	0.000834907	-0.435433	0.103	0.332	1	6.83676e-07	-0.482268	0.079	0.31	0.0139094	9.08997e-06	-0.524994	0.099	0.346	0.184935	2.09675e-06	-0.325485	0.081	0.271	0.0426583	4.14793e-06	-0.334192	0.116	0.294	0.0843896	7.49248e-05	-0.389623	0.136	0.329	1	2.79215e-07	-0.525681	0.086	0.337	0.00568062	1.82642e-14	-0.544857	0.089	0.361	3.71586e-10	0.000834907	1.46114e-13
Pkm	0.0148242	-0.255359	0.466	0.691	1	1.69992e-06	-0.339216	0.316	0.625	0.0345848	6.9e-07	-0.388281	0.37	0.734	0.014038	4.08977e-13	-0.41103	0.242	0.66	8.32063e-09	3.37302e-13	-0.408021	0.277	0.655	6.8624e-09	1.11286e-08	-0.398399	0.355	0.716	0.000226411	1.11407e-05	-0.333362	0.457	0.719	0.226657	2.48719e-10	-0.322818	0.404	0.696	5.06018e-06	0.0148242	2.69841e-12
Eef1a2	5.09552e-05	-0.359875	0.138	0.452	1	1.27824e-07	-0.303696	0.088	0.356	0.00260057	2.36584e-06	-0.255394	0.123	0.434	0.048133	3.88757e-10	-0.310443	0.047	0.298	7.90926e-06	8.22011e-10	-0.277572	0.098	0.348	1.67238e-05	1.84259e-08	-0.399614	0.255	0.602	0.000374875	6.896e-10	-0.413168	0.086	0.42	1.40299e-05	2.25441e-16	-0.423893	0.254	0.622	4.58659e-12	5.09552e-05	1.80352e-15
Syn1	4.90613e-05	-0.394762	0.19	0.519	0.998151	6.36446e-12	-0.411188	0.079	0.441	1.29485e-07	6.16354e-07	-0.407013	0.21	0.551	0.0125397	5.19129e-14	-0.40666	0.114	0.484	1.05617e-09	1.46511e-11	-0.342267	0.156	0.47	2.98076e-07	5.39793e-10	-0.400672	0.182	0.551	1.09821e-05	2.05644e-09	-0.409659	0.171	0.53	4.18382e-05	7.0226e-12	-0.289651	0.239	0.561	1.42875e-07	4.90613e-05	4.15303e-13
Ube2r2	4.81919e-09	-0.702331	0.069	0.494	9.80464e-05	1.85805e-09	-0.350333	0.123	0.458	3.7802e-05	1.15983e-07	-0.318341	0.148	0.526	0.00235967	6.53319e-15	-0.455037	0.087	0.458	1.32918e-10	1.57254e-13	-0.36184	0.104	0.42	3.19933e-09	4.85279e-10	-0.40193	0.164	0.523	9.87299e-06	1.24866e-09	-0.389472	0.133	0.488	2.5404e-05	7.33025e-19	-0.452601	0.089	0.438	1.49134e-14	1.15983e-07	5.8642e-18
Synrg	1.39204e-05	-0.336424	0.052	0.351	0.283211	4.95956e-11	-0.466024	0.035	0.349	1.00902e-06	8.22089e-08	-0.434706	0.062	0.377	0.00167254	1.52215e-11	-0.370479	0.067	0.362	3.09681e-07	1.6024e-11	-0.352844	0.069	0.33	3.26008e-07	3.32818e-10	-0.402072	0.064	0.375	6.77119e-06	3.45259e-09	-0.40244	0.076	0.39	7.0243e-05	1.33062e-13	-0.333546	0.052	0.304	2.70715e-09	1.39204e-05	1.0645e-12
Serf2	2.53534e-05	-0.335517	0.431	0.811	0.515815	6.09832e-10	-0.415188	0.377	0.729	1.2407e-05	8.57828e-10	-0.538247	0.42	0.799	1.74525e-05	4.74971e-11	-0.368331	0.295	0.701	9.66328e-07	4.65313e-08	-0.283439	0.387	0.713	0.000946679	1.32556e-08	-0.402192	0.473	0.769	0.000269686	1.31412e-10	-0.496909	0.41	0.771	2.67358e-06	4.14748e-09	-0.284058	0.465	0.76	8.43805e-05	2.53534e-05	3.79977e-10
Pcbp1	1.61522e-05	-0.413355	0.138	0.463	0.328617	7.01354e-11	-0.416411	0.07	0.401	1.42691e-06	7.28737e-06	-0.262301	0.148	0.462	0.148261	1.1364e-12	-0.353448	0.094	0.434	2.31201e-08	3.23069e-11	-0.291609	0.11	0.399	6.57283e-07	1.40317e-10	-0.406737	0.091	0.439	2.85476e-06	2.93252e-08	-0.375613	0.133	0.45	0.000596621	2.99028e-13	-0.346597	0.141	0.446	6.08373e-09	1.61522e-05	2.39223e-12
Sub1	1.95856e-06	-0.496328	0.293	0.717	0.039847	9.40276e-14	-0.621453	0.228	0.652	1.91299e-09	1.43884e-06	-0.361027	0.37	0.743	0.0292732	4.01427e-15	-0.503508	0.242	0.673	8.16703e-11	5.40207e-18	-0.587406	0.249	0.645	1.09905e-13	8.38444e-11	-0.408435	0.373	0.74	1.70582e-06	3.50961e-11	-0.558359	0.352	0.715	7.14029e-07	1.55624e-17	-0.459162	0.258	0.647	3.16616e-13	1.95856e-06	4.32165e-17
Atp5g2	3.56944e-10	-0.743559	0.052	0.52	7.26203e-06	1.17127e-10	-0.351299	0.14	0.524	2.38294e-06	4.24576e-10	-0.561345	0.185	0.627	8.63799e-06	1.15228e-13	-0.38094	0.154	0.533	2.34431e-09	3.48548e-14	-0.36725	0.168	0.533	7.0912e-10	4.75599e-12	-0.409578	0.2	0.605	9.67607e-08	1.08441e-10	-0.492728	0.171	0.564	2.20623e-06	4.21855e-18	-0.416603	0.127	0.486	8.58264e-14	4.24576e-10	3.37484e-17
Vti1b	9.15255e-09	-0.679702	0.138	0.579	0.000186209	4.77469e-11	-0.456568	0.167	0.55	9.7141e-07	2.43871e-06	-0.318828	0.259	0.623	0.0496156	1.9515e-18	-0.527025	0.121	0.559	3.97033e-14	2.75392e-10	-0.282325	0.208	0.528	5.60286e-06	1.29635e-09	-0.410219	0.282	0.652	2.63743e-05	3.0575e-14	-0.6025	0.143	0.599	6.22049e-10	3.17277e-12	-0.29712	0.197	0.521	6.455e-08	2.43871e-06	1.5612e-17
Atp6v1b2	4.13982e-12	-0.90137	0.155	0.71	8.42245e-08	2.87782e-12	-0.543515	0.211	0.625	5.85493e-08	8.52781e-08	-0.433326	0.37	0.733	0.00173498	8.3263e-16	-0.522223	0.228	0.651	1.69399e-11	5.02399e-16	-0.526737	0.26	0.644	1.02213e-11	3.19472e-09	-0.410589	0.373	0.714	6.49966e-05	1.81816e-13	-0.601935	0.286	0.712	3.69904e-09	3.1618e-16	-0.454207	0.413	0.715	6.43269e-12	8.52781e-08	2.52944e-15
Rnf220	3.93834e-05	-0.316597	0.172	0.515	0.801254	1.22945e-07	-0.265763	0.14	0.449	0.00250133	3.73416e-06	-0.29421	0.185	0.518	0.0759714	3.06398e-15	-0.455535	0.107	0.496	6.23367e-11	3.12055e-15	-0.377609	0.116	0.466	6.34875e-11	1.83824e-12	-0.410889	0.127	0.535	3.73989e-08	4.23625e-09	-0.409833	0.181	0.525	8.61865e-05	5.64342e-19	-0.467342	0.117	0.481	1.14815e-14	3.93834e-05	4.51473e-18
Ptms	5.73431e-11	-0.73954	0.19	0.716	1.16664e-06	6.32281e-10	-0.429494	0.202	0.579	1.28638e-05	8.53016e-15	-0.789644	0.173	0.678	1.73546e-10	2.35596e-14	-0.478113	0.181	0.6	4.7932e-10	2.60267e-13	-0.367086	0.231	0.596	5.29513e-09	6.92691e-09	-0.410913	0.309	0.661	0.000140928	5.43676e-10	-0.521263	0.248	0.621	1.10611e-05	1.53411e-16	-0.487726	0.31	0.672	3.12115e-12	6.92691e-09	1.22729e-15
Gnl3l	0.000205876	-0.366611	0.362	0.694	1	1.32328e-06	-0.352252	0.342	0.647	0.0269221	6.17497e-05	-0.282151	0.432	0.756	1	2.75782e-17	-0.487854	0.255	0.711	5.61078e-13	2.74347e-12	-0.410985	0.324	0.668	5.5816e-08	9.58743e-09	-0.411553	0.418	0.739	0.000195056	3.91671e-06	-0.359495	0.457	0.734	0.0796854	1.34947e-19	-0.519031	0.347	0.715	2.74549e-15	0.000205876	1.07957e-18
Vat1l	2.11377e-05	-0.470675	0.241	0.601	0.430046	3.08527e-13	-0.623797	0.114	0.508	6.27698e-09	2.3782e-06	-0.379324	0.259	0.612	0.0483844	5.05393e-19	-0.692673	0.121	0.547	1.02822e-14	5.71653e-19	-0.643803	0.139	0.519	1.16303e-14	2.69604e-08	-0.412628	0.273	0.602	0.00054851	6.32096e-11	-0.513248	0.219	0.599	1.286e-06	1.2011e-17	-0.510065	0.207	0.575	2.44363e-13	2.11377e-05	4.04314e-18
Ppp2ca	7.16894e-07	-0.399784	0.224	0.641	0.0145852	9.54225e-08	-0.313908	0.211	0.553	0.00194137	3.85331e-07	-0.337814	0.259	0.633	0.00783957	5.64566e-11	-0.267878	0.208	0.582	1.14861e-06	2.83683e-11	-0.39719	0.237	0.561	5.77153e-07	6.44863e-10	-0.418033	0.291	0.638	1.31197e-05	6.47452e-10	-0.448178	0.267	0.651	1.31724e-05	1.07741e-11	-0.326377	0.277	0.607	2.19198e-07	7.16894e-07	8.61924e-11
Nbdy	1.03027e-05	-0.385884	0.19	0.554	0.209608	1.16579e-13	-0.515751	0.096	0.508	2.37181e-09	5.08234e-05	-0.278709	0.259	0.577	1	2.01754e-14	-0.412509	0.128	0.504	4.10469e-10	8.85579e-13	-0.386195	0.15	0.481	1.80171e-08	8.79724e-11	-0.421026	0.173	0.566	1.7898e-06	5.7171e-08	-0.387043	0.21	0.543	0.00116314	3.83177e-17	-0.403922	0.164	0.534	7.79573e-13	5.08234e-05	3.06541e-16
Cbx5	1.24353e-07	-0.605473	0.207	0.634	0.00252997	3.90517e-06	-0.280024	0.263	0.58	0.0794506	3.78312e-09	-0.455981	0.259	0.68	7.69676e-05	4.68445e-21	-0.65271	0.141	0.632	9.53051e-17	6.83103e-11	-0.356943	0.266	0.599	1.38977e-06	3.48434e-09	-0.421925	0.345	0.683	7.08889e-05	9.27447e-07	-0.325882	0.343	0.67	0.0188689	1.53266e-12	-0.367591	0.268	0.599	3.11819e-08	3.90517e-06	3.74756e-20
Rab7	4.99236e-06	-0.328393	0.172	0.572	0.10157	2.58557e-12	-0.491743	0.088	0.468	5.26033e-08	7.65977e-06	-0.267776	0.222	0.565	0.155838	2.80471e-12	-0.295493	0.128	0.481	5.70618e-08	2.36575e-10	-0.299526	0.168	0.465	4.81312e-06	4.72118e-11	-0.425512	0.173	0.563	9.60524e-07	1.40275e-10	-0.443082	0.162	0.546	2.85389e-06	1.06299e-16	-0.419809	0.169	0.531	2.16266e-12	7.65977e-06	8.50395e-16
Pja2	1.89891e-08	-0.570241	0.379	0.779	0.000386334	7.87965e-13	-0.605723	0.281	0.685	1.60312e-08	7.65063e-06	-0.353785	0.432	0.761	0.155652	1.1698e-10	-0.404565	0.362	0.73	2.37997e-06	5.01171e-16	-0.547044	0.353	0.704	1.01963e-11	3.91863e-09	-0.425974	0.427	0.746	7.97244e-05	8.19282e-10	-0.440721	0.486	0.771	1.66683e-05	6.4263e-21	-0.558117	0.418	0.75	1.30743e-16	7.65063e-06	5.14104e-20
Bex3	4.68924e-06	-0.486615	0.293	0.728	0.0954026	9.59372e-09	-0.377814	0.272	0.638	0.000195184	2.96269e-08	-0.480354	0.358	0.725	0.00060276	4.46356e-17	-0.526538	0.215	0.675	9.08111e-13	6.39705e-10	-0.322693	0.324	0.655	1.30148e-05	1.59268e-09	-0.426023	0.382	0.735	3.2403e-05	2.1326e-13	-0.565354	0.286	0.707	4.33877e-09	5.93398e-20	-0.529315	0.249	0.654	1.20727e-15	4.68924e-06	4.74718e-19
Ncoa7	1.58729e-09	-0.798559	0.155	0.595	3.22933e-05	9.68908e-11	-0.457012	0.167	0.548	1.97124e-06	1.05661e-05	-0.345093	0.259	0.599	0.214967	4.38617e-14	-0.423033	0.174	0.576	8.92366e-10	3.02629e-13	-0.351392	0.191	0.538	6.15699e-09	5.02845e-10	-0.428033	0.209	0.589	1.02304e-05	2.07632e-11	-0.500274	0.19	0.605	4.22426e-07	6.29658e-15	-0.403365	0.192	0.541	1.28104e-10	1.05661e-05	5.03727e-14
Ywhaq	4.02055e-08	-0.635985	0.276	0.722	0.000817982	1.39714e-14	-0.643088	0.211	0.643	2.84248e-10	9.66518e-09	-0.523614	0.346	0.732	0.000196638	5.66378e-22	-0.676242	0.181	0.684	1.1523e-17	5.44407e-16	-0.552744	0.283	0.652	1.1076e-11	3.57726e-10	-0.428418	0.355	0.71	7.27793e-06	1.347e-05	-0.284552	0.486	0.73	0.274047	1.11658e-16	-0.440476	0.371	0.701	2.27168e-12	1.347e-05	4.53102e-21
Rit2	0.000238454	-0.332208	0.224	0.543	1	4.08184e-14	-0.577933	0.088	0.496	8.3045e-10	6.43808e-10	-0.586836	0.16	0.564	1.30983e-05	2.54659e-16	-0.51634	0.134	0.55	5.18105e-12	3.62002e-14	-0.447189	0.156	0.5	7.36494e-10	7.3056e-10	-0.430513	0.209	0.569	1.48632e-05	6.09078e-14	-0.603119	0.133	0.564	1.23917e-09	1.76325e-14	-0.379197	0.188	0.534	3.58734e-10	0.000238454	2.03728e-15
Dcaf7	2.43236e-06	-0.464507	0.19	0.594	0.0494863	9.34406e-11	-0.424711	0.123	0.491	1.90105e-06	1.78658e-08	-0.461856	0.21	0.608	0.000363479	4.68339e-16	-0.329685	0.121	0.534	9.52836e-12	3.56389e-10	-0.327444	0.191	0.49	7.25074e-06	8.55985e-10	-0.430667	0.218	0.574	1.7415e-05	2.01663e-09	-0.455951	0.229	0.603	4.10284e-05	1.55108e-11	-0.303084	0.286	0.616	3.15566e-07	2.43236e-06	3.74671e-15
Hspa8	4.28036e-05	-0.453556	0.448	0.791	0.870839	6.93377e-13	-0.597186	0.439	0.767	1.41068e-08	2.76147e-06	-0.388293	0.593	0.823	0.0561821	1.09559e-17	-0.640725	0.329	0.75	2.22897e-13	1.90935e-14	-0.515003	0.434	0.738	3.88458e-10	1.45431e-11	-0.430903	0.627	0.846	2.9588e-07	1.24098e-11	-0.564823	0.524	0.799	2.52477e-07	1.53125e-19	-0.543715	0.427	0.758	3.11533e-15	4.28036e-05	1.225e-18
Nudt3	8.10023e-06	-0.373401	0.172	0.551	0.164799	6.09982e-09	-0.28435	0.158	0.515	0.000124101	4.95709e-11	-0.57244	0.148	0.595	1.00852e-06	1.09192e-10	-0.302338	0.174	0.526	2.22152e-06	4.04196e-13	-0.39976	0.162	0.499	8.22337e-09	8.7076e-11	-0.433388	0.182	0.568	1.77156e-06	8.78951e-09	-0.369728	0.219	0.585	0.000178823	1.07926e-17	-0.402959	0.16	0.532	2.19575e-13	8.10023e-06	8.63405e-17
Tma7	4.948e-08	-0.518359	0.534	0.855	0.00100667	1.05802e-11	-0.529594	0.456	0.769	2.15255e-07	4.21083e-11	-0.512564	0.556	0.849	8.56693e-07	5.56894e-09	-0.280531	0.477	0.788	0.0001133	2.22482e-12	-0.408495	0.491	0.779	4.52639e-08	3.58084e-10	-0.435347	0.618	0.822	7.28522e-06	1.51962e-13	-0.55364	0.524	0.811	3.09167e-09	4.61391e-19	-0.500637	0.488	0.78	9.38701e-15	4.948e-08	3.69113e-18
Gda	0.00696716	-0.317099	0.19	0.388	1	3.37499e-06	-0.463704	0.105	0.328	0.0686641	5.20562e-07	-0.690638	0.123	0.409	0.0105908	5.09224e-12	-0.622318	0.074	0.371	1.03602e-07	2.30915e-08	-0.484831	0.11	0.323	0.000469797	1.13485e-05	-0.444259	0.127	0.345	0.230886	0.00226007	-0.317667	0.2	0.358	1	6.61445e-07	-0.330204	0.113	0.281	0.0134571	0.00696716	4.07379e-11
Sec61g	1.1698e-05	-0.407598	0.276	0.67	0.237996	4.62069e-12	-0.407262	0.184	0.606	9.40079e-08	0.000396207	-0.263311	0.383	0.677	1	7.90378e-11	-0.282389	0.215	0.597	1.60802e-06	1.70585e-12	-0.32391	0.22	0.571	3.47055e-08	4.86126e-11	-0.445082	0.273	0.679	9.89023e-07	6.75722e-07	-0.328679	0.295	0.63	0.0137476	5.63168e-28	-0.677579	0.178	0.638	1.14576e-23	0.000396207	4.50534e-27
Rtf1	3.14143e-06	-0.439507	0.207	0.605	0.0639124	1.79652e-10	-0.410846	0.175	0.552	3.65502e-06	2.61952e-08	-0.415638	0.21	0.631	0.000532942	1.64113e-14	-0.446273	0.201	0.617	3.33887e-10	1.52325e-12	-0.412294	0.214	0.564	3.09905e-08	8.75189e-11	-0.447428	0.227	0.608	1.78057e-06	2.44012e-12	-0.551573	0.181	0.604	4.96442e-08	1.26528e-20	-0.493691	0.169	0.574	2.57421e-16	3.14143e-06	1.01222e-19
Cacna2d1	0.0001053	-0.664827	0.052	0.3	1	2.80909e-10	-0.808427	0.132	0.449	5.71509e-06	0.000686808	-0.391133	0.173	0.389	1	2.51979e-09	-0.6146	0.121	0.385	5.12651e-05	7.35848e-11	-0.742276	0.139	0.396	1.49708e-06	2.63887e-05	-0.448552	0.173	0.389	0.536877	1.77931e-08	-0.70096	0.133	0.43	0.000362	3.82138e-11	-0.563146	0.174	0.428	7.7746e-07	0.000686808	3.05711e-10
Stx1b	0.00152774	-0.289739	0.241	0.533	1	6.26641e-08	-0.267918	0.14	0.453	0.0012749	0.000280149	-0.250933	0.272	0.566	1	1.42574e-14	-0.481359	0.114	0.49	2.90067e-10	1.05621e-06	-0.254162	0.237	0.487	0.0214885	1.00035e-09	-0.449176	0.218	0.572	2.03522e-05	5.19916e-08	-0.376696	0.219	0.561	0.00105777	9.72016e-14	-0.401803	0.23	0.569	1.97757e-09	0.00152774	1.14059e-13
Chd3os	3.17111e-06	-0.507171	0.655	0.838	0.0645163	4.22382e-08	-0.415618	0.579	0.779	0.000859336	1.29271e-08	-0.499284	0.617	0.853	0.000263001	3.59352e-15	-0.513918	0.497	0.815	7.31102e-11	9.07056e-17	-0.53078	0.572	0.821	1.84541e-12	1.54131e-09	-0.45111	0.645	0.827	3.13579e-05	3.34078e-09	-0.459624	0.667	0.836	6.79682e-05	3.16384e-25	-0.654107	0.484	0.782	6.43683e-21	3.17111e-06	2.53107e-24
Wbp2	2.14696e-07	-0.535843	0.138	0.56	0.00436798	2.18996e-10	-0.422346	0.158	0.538	4.45547e-06	2.94188e-07	-0.441341	0.247	0.617	0.00598526	1.23968e-10	-0.305292	0.208	0.582	2.52212e-06	6.71323e-10	-0.307624	0.225	0.544	1.36581e-05	1.51196e-09	-0.452046	0.291	0.651	3.07608e-05	2.1726e-12	-0.506667	0.19	0.608	4.42016e-08	6.34132e-13	-0.334676	0.225	0.559	1.29014e-08	2.94188e-07	5.07306e-12
Eif3e	5.53296e-06	-0.380307	0.138	0.5	0.112568	7.68489e-10	-0.428536	0.167	0.526	1.56349e-05	0.000463643	-0.251818	0.309	0.608	1	3.32676e-17	-0.48078	0.128	0.547	6.76829e-13	1.17301e-20	-0.62316	0.104	0.518	2.38649e-16	1.61701e-11	-0.453481	0.209	0.619	3.28981e-07	6.91735e-12	-0.517273	0.143	0.548	1.40734e-07	1.73126e-15	-0.436889	0.122	0.441	3.52225e-11	0.000463643	9.38409e-20
Stxbp1	1.03469e-06	-0.548525	0.466	0.772	0.0210508	2.67556e-12	-0.590743	0.316	0.688	5.44343e-08	1.3625e-07	-0.465347	0.519	0.787	0.002772	2.0988e-18	-0.654324	0.336	0.742	4.27e-14	1.18888e-14	-0.528332	0.393	0.714	2.41878e-10	3.50297e-10	-0.455809	0.518	0.801	7.1268e-06	3.79447e-10	-0.489033	0.533	0.775	7.71985e-06	3.33624e-17	-0.474292	0.521	0.767	6.78757e-13	1.03469e-06	1.67904e-17
Nucks1	4.13072e-05	-0.360913	0.241	0.622	0.840395	4.02214e-10	-0.377999	0.193	0.585	8.18304e-06	0.000230006	-0.284255	0.346	0.64	1	8.87659e-16	-0.495323	0.195	0.632	1.80594e-11	8.19958e-14	-0.425435	0.231	0.601	1.6682e-09	1.81601e-11	-0.457366	0.273	0.652	3.69467e-07	7.08621e-11	-0.515405	0.257	0.654	1.44169e-06	1.64707e-23	-0.567014	0.16	0.589	3.35097e-19	0.000230006	1.31766e-22
1110004F10Rik	1.39966e-09	-0.65793	0.103	0.555	2.84761e-05	1.99677e-07	-0.296324	0.175	0.501	0.00406243	3.64728e-10	-0.511533	0.136	0.557	7.42039e-06	2.14889e-15	-0.377296	0.121	0.522	4.37192e-11	3.1681e-15	-0.442694	0.145	0.511	6.44551e-11	3.2017e-11	-0.459991	0.182	0.565	6.51386e-07	2.22546e-09	-0.383566	0.162	0.526	4.5277e-05	5.9381e-17	-0.377305	0.127	0.479	1.20811e-12	1.99677e-07	4.75048e-16
Gnao1	6.35805e-10	-0.675963	0.379	0.782	1.29355e-05	2.81887e-13	-0.588748	0.298	0.697	5.73498e-09	5.27055e-17	-0.805883	0.272	0.787	1.07229e-12	2.30877e-15	-0.505745	0.295	0.733	4.69719e-11	2.15857e-17	-0.570612	0.312	0.698	4.39161e-13	8.81944e-10	-0.462908	0.464	0.771	1.79432e-05	3.49285e-11	-0.518787	0.419	0.772	7.1062e-07	2.54e-20	-0.520378	0.362	0.725	5.16762e-16	8.81944e-10	2.032e-19
Chchd2	1.31302e-09	-0.674296	0.379	0.818	2.67134e-05	3.21163e-13	-0.562921	0.439	0.763	6.53406e-09	6.05211e-12	-0.605535	0.469	0.839	1.2313e-07	3.64965e-20	-0.635574	0.376	0.783	7.42521e-16	5.08298e-22	-0.636802	0.422	0.765	1.03413e-17	3.62145e-12	-0.462945	0.591	0.841	7.36785e-08	2.36285e-17	-0.693336	0.505	0.804	4.80721e-13	5.70412e-22	-0.547918	0.366	0.738	1.1605e-17	1.31302e-09	4.06639e-21
Wbp4	1.79306e-08	-0.670534	0.103	0.528	0.000364797	2.37941e-12	-0.500622	0.088	0.46	4.84091e-08	5.90018e-08	-0.443456	0.148	0.51	0.00120039	7.38242e-12	-0.349199	0.154	0.513	1.50195e-07	2.26683e-10	-0.289689	0.15	0.449	4.61186e-06	1.95611e-11	-0.467395	0.145	0.524	3.97971e-07	2.15099e-13	-0.594222	0.114	0.533	4.37619e-09	7.07077e-12	-0.258568	0.169	0.472	1.43855e-07	5.90018e-08	1.72079e-12
Ap2m1	0.00243135	-0.254632	0.328	0.642	1	9.01089e-07	-0.253278	0.219	0.541	0.0183327	5.28132e-06	-0.379497	0.309	0.652	0.107448	2.62953e-18	-0.521154	0.121	0.561	5.34977e-14	2.64359e-09	-0.325342	0.231	0.54	5.37838e-05	1.55101e-11	-0.46767	0.236	0.641	3.15553e-07	1.28995e-05	-0.316451	0.324	0.621	0.262441	7.02314e-08	-0.26514	0.38	0.651	0.00142886	0.00243135	2.10362e-17
Celf4	2.93796e-12	-0.677666	0.69	0.92	5.97729e-08	2.31558e-19	-0.726503	0.57	0.847	4.71104e-15	3.58307e-18	-0.71509	0.704	0.905	7.28976e-14	2.11889e-23	-0.638239	0.617	0.867	4.31089e-19	2.08552e-19	-0.500812	0.659	0.861	4.24299e-15	1.28121e-14	-0.467805	0.8	0.913	2.60662e-10	6.44447e-15	-0.507069	0.819	0.896	1.31113e-10	2.30843e-34	-0.624105	0.742	0.89	4.6965e-30	2.93796e-12	1.84674e-33
Uqcc2	1.0173e-07	-0.61861	0.19	0.61	0.0020697	1.96104e-06	-0.270443	0.263	0.595	0.0398974	1.38436e-05	-0.263122	0.284	0.642	0.281649	4.34702e-11	-0.285629	0.195	0.571	8.84401e-07	1.47355e-11	-0.366553	0.243	0.587	2.99795e-07	1.59912e-10	-0.468108	0.245	0.63	3.2534e-06	8.57738e-09	-0.413707	0.229	0.596	0.000174507	7.53874e-18	-0.48561	0.197	0.575	1.53376e-13	1.38436e-05	6.03099e-17
Pkig	1.21147e-06	-0.447209	0.172	0.565	0.0246474	4.97515e-13	-0.53896	0.123	0.532	1.01219e-08	1.03817e-06	-0.346197	0.198	0.558	0.0211215	4.79858e-15	-0.426663	0.114	0.506	9.76272e-11	5.11116e-20	-0.565878	0.098	0.499	1.03987e-15	8.34995e-13	-0.468341	0.173	0.59	1.6988e-08	1.27289e-16	-0.677599	0.086	0.557	2.5897e-12	2.19949e-17	-0.41302	0.127	0.481	4.47486e-13	1.21147e-06	4.08893e-19
Atp6v1a	4.30629e-08	-0.620908	0.328	0.756	0.000876114	1.16272e-09	-0.469132	0.289	0.643	2.36555e-05	9.14285e-09	-0.480772	0.407	0.775	0.000186011	3.89904e-21	-0.690222	0.248	0.719	7.93259e-17	9.09749e-20	-0.625226	0.301	0.686	1.85088e-15	1.62222e-10	-0.475076	0.436	0.737	3.30041e-06	4.8971e-13	-0.569803	0.41	0.762	9.96315e-09	1.53124e-19	-0.53216	0.394	0.721	3.11531e-15	4.30629e-08	3.11923e-20
Snap47	1.18863e-08	-0.664524	0.103	0.557	0.000241826	6.90442e-15	-0.628088	0.079	0.489	1.4047e-10	1.04521e-09	-0.46167	0.16	0.596	2.12647e-05	1.06093e-14	-0.354758	0.114	0.498	2.15847e-10	2.79509e-10	-0.347775	0.179	0.479	5.6866e-06	4.43302e-12	-0.475165	0.173	0.59	9.01898e-08	4.09231e-10	-0.453401	0.181	0.568	8.3258e-06	1.34285e-11	-0.304885	0.244	0.567	2.73202e-07	1.18863e-08	5.52354e-14
Chchd4	1.04738e-06	-0.473331	0.207	0.589	0.0213089	1.13593e-06	-0.251912	0.228	0.548	0.0231105	4.29899e-10	-0.539553	0.198	0.633	8.7463e-06	1.68016e-11	-0.304943	0.174	0.553	3.41828e-07	8.61792e-12	-0.349024	0.225	0.568	1.75331e-07	5.52832e-12	-0.476227	0.255	0.667	1.12474e-07	7.22909e-06	-0.277713	0.286	0.609	0.147076	6.21312e-19	-0.463811	0.183	0.573	1.26406e-14	7.22909e-06	4.9705e-18
Cab39	3.68132e-08	-0.578334	0.103	0.524	0.000748964	4.75134e-11	-0.425988	0.105	0.466	9.6666e-07	3.82041e-08	-0.449311	0.173	0.546	0.000777263	1.9293e-17	-0.479959	0.094	0.513	3.92516e-13	1.93325e-09	-0.303696	0.191	0.475	3.93319e-05	3.53265e-12	-0.476871	0.145	0.556	7.18717e-08	5.14892e-09	-0.399603	0.2	0.566	0.000104755	3.77315e-22	-0.542551	0.103	0.493	7.67648e-18	3.82041e-08	3.01852e-21
Timm8b	0.00272588	-0.257607	0.379	0.706	1	2.1715e-12	-0.516573	0.228	0.645	4.41792e-08	9.5724e-09	-0.432818	0.296	0.728	0.000194751	1.19214e-15	-0.44263	0.221	0.659	2.4254e-11	2.15135e-10	-0.345996	0.318	0.658	4.37693e-06	1.11301e-10	-0.480905	0.318	0.714	2.26442e-06	3.21823e-11	-0.499209	0.295	0.689	6.54748e-07	4.15727e-15	-0.422145	0.272	0.641	8.45797e-11	0.00272588	9.53709e-15
Bag1	0.000303327	-0.372961	0.328	0.649	1	1.0585e-12	-0.574446	0.184	0.597	2.15353e-08	7.60527e-16	-0.784199	0.136	0.682	1.54729e-11	3.49578e-24	-0.72497	0.114	0.62	7.11216e-20	6.20924e-28	-0.847268	0.127	0.606	1.26327e-23	1.96534e-12	-0.481645	0.282	0.696	3.99848e-08	5.40228e-14	-0.624793	0.229	0.67	1.09909e-09	1.89357e-20	-0.495953	0.169	0.562	3.85248e-16	0.000303327	4.96739e-27
Sqstm1	1.18809e-07	-0.59021	0.103	0.498	0.00241717	2.00599e-13	-0.567609	0.07	0.46	4.08118e-09	1.47859e-08	-0.43824	0.173	0.568	0.000300818	6.95063e-18	-0.505257	0.087	0.504	1.41411e-13	2.4623e-19	-0.548726	0.081	0.471	5.00956e-15	8.6514e-15	-0.482182	0.127	0.551	1.76013e-10	2.05903e-08	-0.391039	0.2	0.543	0.000418909	2.65027e-14	-0.340622	0.174	0.506	5.39197e-10	1.18809e-07	1.96984e-18
Skp1a	1.3074e-10	-0.807081	0.138	0.631	2.6599e-06	6.16979e-15	-0.687465	0.132	0.549	1.25524e-10	4.44048e-12	-0.622918	0.173	0.645	9.03416e-08	5.70431e-22	-0.66148	0.121	0.593	1.16054e-17	1.04919e-16	-0.517974	0.179	0.571	2.13457e-12	9.55148e-12	-0.483772	0.227	0.613	1.94325e-07	2.48179e-14	-0.592261	0.162	0.618	5.04921e-10	3.63574e-21	-0.552892	0.174	0.579	7.39692e-17	1.3074e-10	4.56345e-21
Prkar1a	2.82251e-09	-0.654739	0.5	0.809	5.74239e-05	1.47186e-12	-0.595432	0.368	0.711	2.99451e-08	5.57615e-08	-0.405495	0.519	0.822	0.00113447	1.43741e-17	-0.588563	0.336	0.757	2.92441e-13	2.3146e-15	-0.499322	0.451	0.742	4.70906e-11	1.22922e-10	-0.485324	0.509	0.79	2.50085e-06	6.2094e-09	-0.414769	0.619	0.799	0.00012633	7.24806e-24	-0.560582	0.493	0.782	1.47462e-19	5.57615e-08	5.79845e-23
Rgs10	1.96071e-06	-0.52341	0.138	0.509	0.0398907	3.78736e-07	-0.385476	0.167	0.459	0.00770539	8.4826e-09	-0.60812	0.198	0.576	0.000172579	8.09928e-14	-0.513573	0.128	0.489	1.6478e-09	9.77932e-16	-0.636511	0.15	0.5	1.9896e-11	2.19413e-08	-0.485499	0.218	0.527	0.000446397	1.56305e-09	-0.548219	0.171	0.516	3.18003e-05	3.15666e-12	-0.406185	0.192	0.489	6.42223e-08	1.96071e-06	7.82346e-15
Lonrf2	0.000615231	-0.347728	0.328	0.648	1	1.74445e-11	-0.548184	0.184	0.574	3.54908e-07	0.000143894	-0.299287	0.37	0.679	1	1.7024e-13	-0.455345	0.195	0.607	3.46354e-09	4.22882e-12	-0.36137	0.225	0.577	8.60353e-08	6.95491e-14	-0.492322	0.218	0.661	1.41498e-09	3.18183e-08	-0.448936	0.333	0.67	0.000647343	9.80528e-18	-0.478199	0.249	0.636	1.99489e-13	0.000615231	7.84423e-17
Eif3m	3.61654e-05	-0.36628	0.086	0.378	0.735786	1.18732e-11	-0.385613	0.07	0.433	2.41561e-07	8.36697e-11	-0.573625	0.086	0.505	1.70226e-06	1.93904e-18	-0.55754	0.06	0.462	3.94498e-14	7.95934e-15	-0.447263	0.087	0.421	1.61933e-10	3.32692e-11	-0.495213	0.164	0.54	6.76861e-07	4.09678e-08	-0.344579	0.143	0.47	0.000833489	6.69873e-17	-0.429903	0.052	0.349	1.36286e-12	3.61654e-05	1.55123e-17
Snap25	0.000870825	-0.364943	0.448	0.78	1	2.18502e-05	-0.309166	0.5	0.75	0.444543	4.67993e-05	-0.372027	0.593	0.804	0.952131	1.41067e-09	-0.390711	0.45	0.783	2.87002e-05	1.50041e-08	-0.342622	0.509	0.766	0.000305259	3.2417e-11	-0.49534	0.464	0.804	6.59524e-07	3.90508e-05	-0.308871	0.638	0.807	0.794488	3.70912e-26	-0.680172	0.441	0.787	7.5462e-22	0.000870825	2.96729e-25
Mapt	1.83732e-09	-0.641366	0.397	0.81	3.73802e-05	7.83613e-14	-0.58576	0.412	0.729	1.59426e-09	2.20529e-08	-0.451826	0.481	0.808	0.000448666	4.44031e-15	-0.528016	0.403	0.765	9.03381e-11	1.28925e-17	-0.532193	0.347	0.715	2.62298e-13	3.5373e-12	-0.499565	0.536	0.815	7.19663e-08	1.97466e-14	-0.575053	0.514	0.809	4.01745e-10	8.58803e-22	-0.546363	0.446	0.768	1.74723e-17	2.20529e-08	6.87042e-21
Eif3h	1.82635e-07	-0.582493	0.224	0.649	0.00371571	5.19519e-15	-0.644782	0.175	0.623	1.05696e-10	3.573e-06	-0.407693	0.383	0.717	0.0726927	3.5366e-19	-0.614599	0.201	0.67	7.19522e-15	4.92239e-22	-0.654505	0.202	0.64	1.00146e-17	1.28539e-11	-0.499898	0.373	0.744	2.61513e-07	1.4075e-19	-0.825388	0.19	0.687	2.86357e-15	4.86912e-22	-0.554252	0.16	0.574	9.90622e-18	3.573e-06	3.8953e-21
Trim44	1.35723e-05	-0.436952	0.172	0.529	0.276128	6.54727e-07	-0.260259	0.193	0.517	0.0133204	2.7177e-07	-0.34724	0.198	0.581	0.00552916	1.1391e-10	-0.330105	0.188	0.541	2.3175e-06	6.00688e-12	-0.331128	0.173	0.503	1.2221e-07	1.48095e-11	-0.500241	0.209	0.597	3.013e-07	1.13782e-08	-0.34509	0.229	0.598	0.00023149	1.06794e-21	-0.490239	0.15	0.563	2.17273e-17	1.35723e-05	8.54353e-21
A730017C20Rik	2.53468e-08	-0.566176	0.172	0.639	0.000515681	3.98907e-08	-0.316761	0.219	0.572	0.000811577	1.19764e-10	-0.544507	0.198	0.641	2.43659e-06	1.43634e-15	-0.419771	0.168	0.589	2.92224e-11	3.04114e-11	-0.372812	0.214	0.54	6.18721e-07	1.55179e-10	-0.501026	0.291	0.65	3.15712e-06	2.34711e-13	-0.618491	0.21	0.645	4.77519e-09	1.74011e-14	-0.420826	0.272	0.617	3.54025e-10	3.98907e-08	1.14907e-14
Hmgn2	1.17163e-08	-0.698112	0.103	0.546	0.000238369	4.11829e-13	-0.525157	0.053	0.429	8.37866e-09	1.21397e-11	-0.581581	0.062	0.49	2.46981e-07	4.19859e-13	-0.375807	0.054	0.368	8.54203e-09	2.07608e-12	-0.396586	0.098	0.393	4.22379e-08	6.87913e-11	-0.502866	0.145	0.511	1.39956e-06	1.95309e-07	-0.326546	0.114	0.406	0.00397357	5.711e-24	-0.653	0.08	0.47	1.1619e-19	1.95309e-07	4.5688e-23
Cox17	8.65396e-09	-0.64357	0.328	0.773	0.000176065	3.43212e-07	-0.378017	0.342	0.66	0.00698266	1.22946e-08	-0.514636	0.37	0.736	0.000250133	3.40549e-12	-0.403373	0.295	0.674	6.92847e-08	4.73386e-07	-0.272607	0.387	0.676	0.00963104	2.38684e-12	-0.508422	0.318	0.72	4.85602e-08	1.36342e-07	-0.386972	0.362	0.693	0.00277387	2.06537e-21	-0.535777	0.23	0.644	4.202e-17	4.73386e-07	1.6523e-20
Celf6	1.21518e-09	-0.752919	0.103	0.569	2.47229e-05	4.28579e-07	-0.308403	0.193	0.51	0.00871944	8.82953e-08	-0.420102	0.198	0.581	0.00179637	2.08815e-16	-0.501709	0.114	0.528	4.24834e-12	2.71285e-12	-0.332084	0.145	0.476	5.51929e-08	3.74639e-11	-0.508623	0.191	0.57	7.62203e-07	4.71273e-11	-0.518645	0.171	0.564	9.58804e-07	3.64165e-18	-0.434725	0.178	0.565	7.40894e-14	4.28579e-07	2.91332e-17
Gng2	1.5787e-05	-0.401969	0.362	0.707	0.321187	2.79145e-12	-0.523717	0.202	0.614	5.67921e-08	1.04887e-08	-0.49977	0.321	0.726	0.000213392	3.75263e-10	-0.343065	0.282	0.66	7.63473e-06	4.68416e-11	-0.406437	0.324	0.633	9.52993e-07	1.29687e-11	-0.513298	0.309	0.699	2.63849e-07	0.000294923	-0.290341	0.486	0.705	1	7.77982e-13	-0.372231	0.347	0.667	1.5828e-08	0.000294923	6.22385e-12
Ran	3.77603e-05	-0.416546	0.224	0.573	0.768234	7.53022e-11	-0.496177	0.175	0.552	1.53202e-06	7.29883e-06	-0.334779	0.296	0.654	0.148495	1.02142e-10	-0.317541	0.215	0.575	2.07808e-06	1.68691e-16	-0.456874	0.168	0.555	3.43202e-12	1.97626e-11	-0.513595	0.291	0.666	4.02071e-07	1.94155e-08	-0.424583	0.276	0.632	0.000395008	9.85448e-18	-0.45158	0.183	0.562	2.00489e-13	3.77603e-05	7.88359e-17
Zcchc12	1.98736e-09	-0.6917	0.207	0.709	4.04329e-05	3.03119e-12	-0.64881	0.246	0.634	6.16695e-08	2.38789e-14	-0.861394	0.296	0.751	4.85817e-10	3.2111e-22	-0.767254	0.195	0.679	6.53299e-18	4.39568e-24	-0.774052	0.191	0.646	8.94301e-20	6.41111e-13	-0.515241	0.282	0.712	1.30434e-08	5.58695e-11	-0.554215	0.333	0.713	1.13666e-06	1.67877e-21	-0.565783	0.239	0.64	3.41546e-17	1.98736e-09	3.51654e-23
Aes	4.82549e-07	-0.547438	0.241	0.662	0.00981746	6.03744e-11	-0.383949	0.193	0.594	1.22832e-06	1.45784e-06	-0.37902	0.309	0.658	0.0296597	1.33829e-11	-0.339039	0.195	0.579	2.72275e-07	1.7504e-13	-0.450032	0.214	0.574	3.56118e-09	2.93573e-11	-0.516513	0.309	0.682	5.97273e-07	5.22082e-13	-0.595815	0.248	0.665	1.06218e-08	3.60098e-19	-0.499207	0.305	0.687	7.32619e-15	1.45784e-06	2.88078e-18
Gnb1	2.06205e-07	-0.707144	0.362	0.736	0.00419523	1.44496e-10	-0.611091	0.36	0.725	2.93977e-06	0.000865625	-0.288635	0.519	0.761	1	2.19873e-11	-0.53796	0.383	0.715	4.47331e-07	6.25294e-06	-0.325122	0.48	0.712	0.127216	5.21505e-08	-0.518512	0.6	0.802	0.001061	6.91496e-07	-0.440854	0.505	0.764	0.0140685	1.03395e-22	-0.660746	0.582	0.811	2.10357e-18	0.000865625	8.27158e-22
Plekhb2	2.89378e-08	-0.609144	0.172	0.609	0.000588739	2.97122e-12	-0.516644	0.149	0.554	6.04495e-08	8.76309e-09	-0.516044	0.247	0.647	0.000178285	3.26005e-15	-0.471184	0.161	0.577	6.63258e-11	7.07866e-17	-0.511706	0.168	0.556	1.44015e-12	1.39135e-12	-0.520925	0.236	0.658	2.83069e-08	3.13949e-08	-0.391453	0.276	0.626	0.000638729	2.84522e-19	-0.520729	0.188	0.581	5.78861e-15	3.13949e-08	2.27618e-18
Wdr6	3.41446e-07	-0.546566	0.259	0.696	0.00694672	5.65069e-09	-0.421185	0.246	0.618	0.000114963	4.02642e-09	-0.543003	0.358	0.736	8.19174e-05	7.99721e-19	-0.599214	0.208	0.67	1.62703e-14	3.94419e-20	-0.646398	0.208	0.625	8.02445e-16	1.32279e-11	-0.521041	0.355	0.723	2.69122e-07	2.50574e-14	-0.604312	0.257	0.692	5.09793e-10	8.12719e-17	-0.4804	0.324	0.692	1.65348e-12	3.41446e-07	3.15535e-19
Hnrnpab	5.09992e-09	-0.740999	0.034	0.437	0.000103758	1.96143e-11	-0.428604	0.07	0.421	3.99054e-07	3.99005e-10	-0.489029	0.074	0.469	8.11776e-06	1.44529e-15	-0.4864	0.067	0.428	2.94043e-11	8.53798e-17	-0.476139	0.058	0.404	1.73705e-12	3.18568e-13	-0.524783	0.073	0.453	6.48127e-09	3.58889e-12	-0.518735	0.086	0.465	7.30159e-08	8.71533e-15	-0.337435	0.089	0.384	1.77313e-10	5.09992e-09	6.83038e-16
Polr2m	3.48458e-07	-0.547228	0.241	0.668	0.00708939	8.59601e-06	-0.262774	0.316	0.613	0.174886	8.21378e-09	-0.433446	0.247	0.685	0.000167109	6.20876e-25	-0.757412	0.114	0.631	1.26317e-20	1.65081e-11	-0.396056	0.266	0.604	3.35858e-07	1.84297e-11	-0.524998	0.327	0.719	3.74952e-07	1.25271e-10	-0.508399	0.286	0.669	2.54865e-06	3.57475e-25	-0.569495	0.207	0.655	7.27284e-21	8.59601e-06	2.8598e-24
Syn2	3.32279e-05	-0.465606	0.345	0.687	0.676022	3.8131e-12	-0.598697	0.184	0.577	7.75776e-08	2.42551e-06	-0.436578	0.321	0.662	0.049347	2.65433e-08	-0.282385	0.262	0.597	0.000540023	5.71487e-14	-0.504503	0.231	0.575	1.16269e-09	2.0641e-10	-0.525044	0.345	0.677	4.19942e-06	3.09021e-08	-0.406995	0.305	0.661	0.000628704	3.81681e-20	-0.538149	0.249	0.64	7.7653e-16	3.32279e-05	3.05345e-19
Rpl28	1.64159e-10	-0.740583	0.328	0.805	3.33982e-06	1.06417e-05	-0.255131	0.509	0.781	0.216506	2.67976e-11	-0.530685	0.543	0.861	5.45197e-07	1.7046e-15	-0.550657	0.389	0.789	3.46801e-11	3.85511e-08	-0.311835	0.532	0.779	0.000784322	1.62613e-12	-0.52579	0.545	0.834	3.30837e-08	1.97913e-10	-0.463328	0.562	0.825	4.02653e-06	4.52188e-20	-0.509624	0.39	0.748	9.19977e-16	1.06417e-05	3.6175e-19
Ralbp1	1.35208e-11	-0.895844	0.172	0.654	2.7508e-07	6.23881e-13	-0.546263	0.184	0.615	1.26929e-08	4.95706e-16	-0.782057	0.16	0.692	1.00851e-11	8.86993e-19	-0.617932	0.215	0.672	1.80459e-14	1.00941e-16	-0.546774	0.231	0.631	2.05365e-12	2.68626e-12	-0.527665	0.273	0.679	5.46519e-08	1.86736e-13	-0.627775	0.276	0.693	3.79914e-09	7.74848e-30	-0.701844	0.113	0.577	1.57643e-25	1.35208e-11	6.19879e-29
Chmp4b	5.16896e-11	-0.858775	0.086	0.576	1.05162e-06	3.84373e-14	-0.473977	0.096	0.524	7.82006e-10	2.5479e-14	-0.693495	0.111	0.611	5.18371e-10	5.34235e-18	-0.484464	0.121	0.558	1.0869e-13	6.8234e-15	-0.453163	0.168	0.539	1.38822e-10	5.1755e-13	-0.528729	0.164	0.581	1.05296e-08	2.3895e-12	-0.559707	0.162	0.573	4.86143e-08	1.87183e-24	-0.62392	0.136	0.558	3.80825e-20	5.16896e-11	1.49747e-23
Napb	2.93314e-07	-0.57436	0.276	0.707	0.00596748	4.32737e-10	-0.43046	0.263	0.634	8.80404e-06	6.85674e-05	-0.372253	0.444	0.732	1	2.88017e-11	-0.400234	0.309	0.673	5.8597e-07	7.745e-12	-0.429536	0.347	0.664	1.57572e-07	1.17649e-09	-0.532803	0.418	0.734	2.39357e-05	1.07403e-10	-0.585985	0.4	0.728	2.18512e-06	1.56651e-13	-0.449072	0.371	0.675	3.18707e-09	6.85674e-05	1.25321e-12
Ppia	5.87191e-08	-0.540127	0.293	0.761	0.00119464	2.87101e-11	-0.541618	0.307	0.692	5.84106e-07	7.15149e-08	-0.477773	0.444	0.771	0.00145497	9.12627e-17	-0.538274	0.255	0.705	1.85674e-12	7.06217e-15	-0.506363	0.347	0.695	1.4368e-10	4.10307e-13	-0.537734	0.436	0.781	8.3477e-09	4.28637e-17	-0.706271	0.352	0.764	8.72063e-13	1.75515e-21	-0.581522	0.3	0.695	3.57086e-17	7.15149e-08	1.40412e-20
Camk2n1	6.53098e-09	-0.82254	0.138	0.577	0.000132873	5.30431e-08	-0.403261	0.167	0.475	0.00107916	9.30143e-12	-0.730572	0.123	0.564	1.89238e-07	4.81263e-15	-0.515576	0.128	0.517	9.79129e-11	3.70219e-12	-0.476087	0.202	0.523	7.53211e-08	2.71123e-11	-0.539367	0.236	0.616	5.516e-07	5.83203e-09	-0.500726	0.21	0.551	0.000118653	1.97843e-25	-0.790311	0.258	0.664	4.02511e-21	5.30431e-08	1.58274e-24
Rgs4	1.59921e-05	-0.596444	0.103	0.414	0.32536	1.62907e-08	-0.434569	0.053	0.32	0.000331435	9.14081e-07	-0.490239	0.099	0.396	0.018597	2.5005e-11	-0.494374	0.034	0.295	5.08726e-07	4.46557e-13	-0.583048	0.064	0.342	9.0852e-09	4.14313e-09	-0.539588	0.055	0.328	8.4292e-05	3.46326e-09	-0.532384	0.057	0.354	7.04599e-05	6.35027e-16	-0.508824	0.094	0.397	1.29196e-11	1.59921e-05	5.08022e-15
Kif21a	1.23306e-06	-0.503399	0.224	0.627	0.0250866	1.18839e-07	-0.311067	0.237	0.584	0.00241778	3.38716e-09	-0.532759	0.259	0.669	6.89117e-05	1.64649e-08	-0.268049	0.289	0.638	0.000334979	6.21659e-11	-0.360782	0.254	0.593	1.26477e-06	3.03132e-12	-0.539824	0.218	0.625	6.16722e-08	1.76635e-11	-0.530448	0.238	0.661	3.59364e-07	1.67755e-08	-0.257183	0.291	0.584	0.000341298	1.23306e-06	2.42506e-11
Rps2	8.08597e-09	-0.57218	0.603	0.883	0.000164509	1.04867e-19	-0.687322	0.596	0.866	2.13352e-15	4.66604e-12	-0.508957	0.79	0.912	9.49306e-08	3.43991e-21	-0.616088	0.584	0.857	6.99849e-17	5.53994e-23	-0.596111	0.624	0.854	1.1271e-18	1.21603e-17	-0.540941	0.764	0.92	2.47401e-13	1.1697e-23	-0.785317	0.59	0.882	2.37976e-19	3.29211e-24	-0.57881	0.507	0.818	6.6978e-20	8.08597e-09	2.63369e-23
Pea15a	8.84572e-09	-0.732295	0.31	0.748	0.000179966	2.85083e-15	-0.736982	0.219	0.654	5.80002e-11	4.73865e-13	-0.684078	0.247	0.718	9.64079e-09	1.54123e-17	-0.568222	0.174	0.62	3.13562e-13	7.51337e-11	-0.363996	0.283	0.61	1.5286e-06	2.04959e-12	-0.54128	0.291	0.706	4.1699e-08	1.66636e-14	-0.654846	0.257	0.703	3.39022e-10	3.34238e-13	-0.361092	0.333	0.68	6.80007e-09	8.84572e-09	1.23298e-16
Tmsb4x	1.07841e-10	-0.630267	0.897	0.944	2.19402e-06	6.93082e-15	-0.570652	0.842	0.931	1.41008e-10	8.54027e-17	-0.691111	0.877	0.956	1.73752e-12	5.17135e-16	-0.561715	0.785	0.915	1.05211e-11	2.1701e-20	-0.493207	0.867	0.937	4.41507e-16	5.84929e-15	-0.545142	0.864	0.935	1.19004e-10	9.39678e-25	-0.737899	0.895	0.949	1.91178e-20	3.45454e-32	-0.546965	0.873	0.942	7.02826e-28	1.07841e-10	2.76363e-31
Hsp90ab1	1.25196e-05	-0.438386	0.603	0.867	0.254711	7.22607e-13	-0.561308	0.518	0.809	1.47014e-08	1.68685e-11	-0.531071	0.704	0.883	3.43189e-07	5.28875e-22	-0.668498	0.47	0.831	1.076e-17	1.15304e-15	-0.491274	0.555	0.81	2.34586e-11	2.91618e-15	-0.547418	0.645	0.85	5.93296e-11	6.28828e-16	-0.608953	0.61	0.863	1.27935e-11	3.6241e-27	-0.640576	0.502	0.81	7.37323e-23	1.25196e-05	2.89928e-26
Eif4g2	0.000349891	-0.332403	0.569	0.815	1	4.63304e-10	-0.49477	0.36	0.705	9.42591e-06	2.39455e-09	-0.502377	0.457	0.791	4.87171e-05	3.23942e-12	-0.433013	0.336	0.729	6.5906e-08	3.14036e-11	-0.41672	0.405	0.712	6.38906e-07	1.85988e-13	-0.547545	0.364	0.773	3.78393e-09	3.12425e-08	-0.395211	0.571	0.792	0.000635628	1.056e-15	-0.417685	0.413	0.748	2.14843e-11	0.000349891	8.448e-15
Rtraf	9.49867e-07	-0.491584	0.121	0.499	0.019325	1.86068e-06	-0.290579	0.228	0.539	0.0378556	4.24212e-13	-0.697701	0.136	0.628	8.63059e-09	7.15087e-19	-0.59043	0.134	0.584	1.45484e-14	8.68919e-11	-0.314589	0.22	0.547	1.76782e-06	1.38842e-13	-0.5499	0.218	0.653	2.82474e-09	1.33714e-13	-0.585575	0.162	0.594	2.72041e-09	1.61458e-22	-0.564203	0.099	0.489	3.28486e-18	1.86068e-06	1.29166e-21
Eif3f	3.83078e-09	-0.711839	0.207	0.656	7.79372e-05	1.07771e-08	-0.3161	0.254	0.616	0.00021926	1.32985e-08	-0.517271	0.333	0.728	0.000270559	3.63175e-15	-0.536307	0.235	0.65	7.3888e-11	8.59909e-22	-0.620027	0.185	0.633	1.74948e-17	1.17349e-13	-0.550695	0.327	0.744	2.38746e-09	5.23361e-11	-0.492949	0.257	0.666	1.06478e-06	4.67969e-25	-0.656249	0.178	0.612	9.52084e-21	1.32985e-08	3.74375e-24
Eid1	3.05323e-10	-0.804017	0.241	0.712	6.2118e-06	1.56309e-09	-0.394392	0.211	0.591	3.18011e-05	8.43289e-12	-0.658771	0.284	0.72	1.71567e-07	3.94394e-17	-0.554416	0.201	0.642	8.02396e-13	2.69983e-21	-0.680053	0.202	0.631	5.49281e-17	2.41042e-13	-0.55181	0.273	0.681	4.90401e-09	1.64615e-14	-0.628299	0.248	0.689	3.34909e-10	2.01535e-18	-0.518526	0.282	0.663	4.10023e-14	1.56309e-09	2.15987e-20
Nsf	4.54428e-05	-0.36683	0.362	0.741	0.924535	2.58597e-09	-0.45985	0.316	0.658	5.26115e-05	9.80353e-11	-0.624689	0.37	0.761	1.99453e-06	4.87944e-22	-0.763261	0.228	0.701	9.92723e-18	1.41855e-10	-0.427507	0.405	0.678	2.88603e-06	1.71652e-11	-0.551966	0.4	0.745	3.49226e-07	2.58736e-10	-0.531093	0.438	0.741	5.26398e-06	2.73197e-13	-0.424565	0.408	0.697	5.5582e-09	4.54428e-05	3.90356e-21
Mrfap1	7.50791e-12	-0.812431	0.414	0.836	1.52748e-07	3.66244e-11	-0.507626	0.474	0.773	7.45124e-07	7.06352e-14	-0.633506	0.469	0.836	1.43707e-09	3.98415e-20	-0.662401	0.349	0.771	8.10576e-16	1.55223e-19	-0.590567	0.399	0.745	3.15802e-15	1.34878e-14	-0.552733	0.555	0.838	2.7441e-10	8.30329e-19	-0.73029	0.486	0.81	1.68931e-14	9.44409e-33	-0.770342	0.296	0.744	1.9214e-28	3.66244e-11	7.55527e-32
Hint1	1.24504e-08	-0.664794	0.276	0.74	0.000253303	7.10381e-10	-0.49075	0.351	0.698	1.44527e-05	6.23747e-16	-0.78415	0.321	0.788	1.26901e-11	1.0058e-14	-0.518	0.302	0.714	2.04629e-10	1.80493e-12	-0.455987	0.376	0.7	3.67212e-08	1.23214e-12	-0.553426	0.364	0.762	2.50679e-08	2.61553e-15	-0.646005	0.276	0.739	5.32131e-11	1.85941e-12	-0.356487	0.366	0.697	3.78296e-08	1.24504e-08	4.98998e-15
Vamp2	2.42283e-10	-0.776096	0.328	0.786	4.92924e-06	4.85693e-17	-0.789459	0.246	0.686	9.88143e-13	2.07117e-09	-0.540019	0.481	0.791	4.2138e-05	3.48212e-17	-0.628949	0.295	0.719	7.08437e-13	4.20029e-22	-0.710632	0.318	0.711	8.5455e-18	9.56325e-13	-0.555428	0.527	0.784	1.94564e-08	1.65741e-13	-0.616889	0.429	0.764	3.372e-09	1.92706e-26	-0.658734	0.465	0.781	3.9206e-22	2.07117e-09	1.54165e-25
Tbca	1.72802e-09	-0.726057	0.172	0.648	3.51566e-05	8.80016e-13	-0.568156	0.193	0.612	1.79039e-08	8.14261e-10	-0.575149	0.272	0.693	1.65661e-05	6.22594e-21	-0.610789	0.148	0.635	1.26667e-16	1.21146e-17	-0.558257	0.202	0.605	2.46471e-13	1.64574e-14	-0.555454	0.255	0.7	3.34826e-10	3.49743e-10	-0.485043	0.267	0.66	7.11552e-06	4.25661e-20	-0.521824	0.192	0.588	8.66007e-16	1.72802e-09	4.98075e-20
Tomm7	6.00523e-05	-0.392229	0.293	0.662	1	2.95981e-06	-0.303708	0.289	0.604	0.0602173	3.75798e-14	-0.698117	0.198	0.687	7.64561e-10	5.37007e-21	-0.648517	0.141	0.613	1.09254e-16	7.76211e-15	-0.44687	0.214	0.613	1.5792e-10	2.83357e-13	-0.55755	0.245	0.679	5.76489e-09	8.22975e-11	-0.493402	0.219	0.631	1.67434e-06	4.60716e-23	-0.540843	0.169	0.599	9.37326e-19	6.00523e-05	3.68572e-22
Eif1	1.94191e-10	-0.611378	0.69	0.906	3.95081e-06	1.73291e-19	-0.669159	0.693	0.871	3.52561e-15	2.77556e-16	-0.640913	0.741	0.908	5.64688e-12	5.2729e-29	-0.763529	0.557	0.852	1.07277e-24	5.59831e-20	-0.507573	0.682	0.849	1.13898e-15	5.55145e-19	-0.560745	0.773	0.913	1.12944e-14	5.36113e-21	-0.70323	0.686	0.881	1.09072e-16	1.18117e-28	-0.598484	0.615	0.861	2.4031e-24	1.94191e-10	4.21832e-28
Snrpn	2.82517e-05	-0.405368	0.621	0.867	0.574781	2.66711e-10	-0.498168	0.526	0.769	5.42623e-06	7.92823e-06	-0.344924	0.691	0.833	0.1613	3.96237e-12	-0.438814	0.43	0.763	8.06144e-08	7.29253e-16	-0.489731	0.48	0.784	1.48367e-11	8.0103e-15	-0.562607	0.564	0.848	1.6297e-10	5.31379e-12	-0.539487	0.514	0.797	1.08109e-07	4.56817e-24	-0.556447	0.512	0.809	9.29393e-20	2.82517e-05	3.65453e-23
Gal	0.00412267	-0.751957	0.017	0.155	1	3.40013e-05	-0.737315	0.026	0.177	0.691755	0.000515504	-0.473276	0.037	0.196	1	0.0023341	-0.501633	0.047	0.134	1	8.38163e-05	-0.43851	0.029	0.132	1	8.48173e-05	-0.562647	0.045	0.193	1	0.0610332	-0.352352	0.114	0.19	1	0.000183255	-0.471817	0.033	0.116	1	0.0610332	0.000271978
Pnmal2	1.5594e-06	-0.488618	0.5	0.829	0.031726	1.05657e-21	-0.954403	0.254	0.713	2.14958e-17	5.83997e-15	-0.745841	0.457	0.813	1.18814e-10	3.63476e-30	-0.955908	0.282	0.764	7.39492e-26	3.19591e-25	-0.782306	0.364	0.734	6.50208e-21	2.12325e-13	-0.563148	0.545	0.79	4.31975e-09	3.17095e-18	-0.762221	0.438	0.79	6.4513e-14	1.33234e-31	-0.767083	0.333	0.752	2.71065e-27	1.5594e-06	1.06587e-30
Rab6a	2.24557e-05	-0.408303	0.414	0.779	0.45686	3.8255e-07	-0.348711	0.377	0.689	0.00778297	1.29977e-09	-0.521663	0.469	0.788	2.64438e-05	1.43298e-14	-0.511901	0.342	0.743	2.9154e-10	1.02362e-15	-0.547398	0.37	0.712	2.08255e-11	7.38653e-13	-0.56591	0.427	0.767	1.50279e-08	6.09253e-11	-0.500893	0.552	0.784	1.23952e-06	2.0805e-26	-0.649113	0.385	0.741	4.23278e-22	2.24557e-05	1.6644e-25
Pdcd4	1.42094e-05	-0.442182	0.172	0.539	0.289091	6.00351e-08	-0.378064	0.184	0.505	0.00122141	2.94403e-09	-0.547644	0.136	0.535	5.98963e-05	3.221e-11	-0.396071	0.161	0.499	6.55312e-07	1.64562e-15	-0.563741	0.133	0.485	3.34801e-11	1.0914e-11	-0.566397	0.182	0.569	2.22046e-07	1.48182e-10	-0.527002	0.162	0.549	3.01476e-06	3.14384e-20	-0.64194	0.146	0.518	6.39615e-16	1.42094e-05	2.51507e-19
Ywhae	3.93655e-07	-0.481238	0.5	0.817	0.00800891	3.61906e-11	-0.518555	0.377	0.72	7.36298e-07	9.1631e-12	-0.592932	0.506	0.8	1.86423e-07	5.95011e-24	-0.788932	0.268	0.739	1.21055e-19	5.58551e-17	-0.557658	0.347	0.713	1.13637e-12	2.71244e-14	-0.56806	0.5	0.787	5.51845e-10	1.4315e-17	-0.697965	0.419	0.785	2.91239e-13	3.65242e-22	-0.52391	0.394	0.752	7.43085e-18	3.93655e-07	4.76009e-23
Pfdn2	1.68113e-08	-0.622253	0.328	0.748	0.000342025	3.28706e-11	-0.51076	0.333	0.71	6.68752e-07	1.21459e-10	-0.562258	0.469	0.804	2.47109e-06	1.80421e-26	-0.828544	0.242	0.749	3.67067e-22	2.45948e-22	-0.68706	0.329	0.729	5.00381e-18	5.24231e-15	-0.570992	0.527	0.814	1.06655e-10	2.7123e-18	-0.75908	0.467	0.788	5.51818e-14	7.6076e-22	-0.603229	0.324	0.714	1.54777e-17	1.68113e-08	1.44337e-25
Map4	9.15114e-06	-0.423272	0.19	0.569	0.18618	8.74579e-13	-0.448439	0.132	0.544	1.77933e-08	7.01469e-07	-0.410378	0.272	0.636	0.0142714	7.10651e-20	-0.624909	0.134	0.591	1.44582e-15	6.21403e-14	-0.447047	0.197	0.553	1.26424e-09	6.29141e-15	-0.577958	0.191	0.615	1.27999e-10	1.75733e-11	-0.515942	0.229	0.629	3.57528e-07	4.05403e-12	-0.383573	0.263	0.566	8.24792e-08	9.15114e-06	5.6852e-19
Rplp0	7.43655e-14	-1.0361	0.155	0.734	1.51297e-09	1.52944e-20	-0.883467	0.149	0.665	3.11164e-16	5.3922e-13	-0.706622	0.321	0.764	1.09704e-08	6.34237e-21	-0.618717	0.195	0.686	1.29035e-16	1.41893e-18	-0.592556	0.254	0.659	2.88681e-14	4.09473e-13	-0.578089	0.345	0.747	8.33072e-09	1.0344e-14	-0.687781	0.257	0.708	2.1045e-10	1.39586e-17	-0.494025	0.282	0.667	2.83988e-13	5.3922e-13	5.07389e-20
Tceal9	1.33328e-11	-0.880171	0.121	0.639	2.71256e-07	6.77332e-14	-0.686133	0.184	0.596	1.37803e-09	6.07963e-12	-0.609204	0.235	0.705	1.2369e-07	1.21489e-20	-0.637652	0.154	0.632	2.4717e-16	1.46012e-15	-0.482312	0.225	0.61	2.97061e-11	1.69401e-14	-0.57831	0.255	0.689	3.44645e-10	6.0905e-17	-0.701019	0.19	0.675	1.23911e-12	8.20932e-26	-0.619239	0.127	0.567	1.67019e-21	1.33328e-11	6.56746e-25
Dbpht2	0.000207171	-0.430209	0.103	0.364	1	5.44694e-08	-0.378853	0.14	0.446	0.00110818	5.84625e-08	-0.424131	0.111	0.464	0.00118942	1.77781e-08	-0.304913	0.161	0.443	0.000361696	3.17438e-11	-0.401789	0.127	0.412	6.45827e-07	8.69283e-11	-0.58139	0.1	0.436	1.76856e-06	6.70328e-08	-0.424158	0.105	0.398	0.00136378	4.37215e-15	-0.498399	0.08	0.367	8.89513e-11	0.000207171	3.49772e-14
Med28	6.26125e-06	-0.459022	0.172	0.532	0.127385	5.45681e-08	-0.339194	0.211	0.551	0.00111019	1.384e-08	-0.476322	0.21	0.612	0.000281574	3.1364e-17	-0.53784	0.128	0.551	6.38101e-13	4.41209e-17	-0.506372	0.156	0.548	8.97639e-13	1.48962e-14	-0.587028	0.164	0.598	3.03064e-10	4.13112e-08	-0.385759	0.219	0.573	0.000840476	1.01403e-15	-0.381394	0.113	0.434	2.06304e-11	6.26125e-06	2.50912e-16
Impact	7.82539e-05	-0.382609	0.638	0.85	1	1.20375e-12	-0.584497	0.632	0.811	2.44904e-08	1.02418e-06	-0.375049	0.765	0.875	0.020837	5.67191e-20	-0.650013	0.544	0.823	1.15395e-15	2.60387e-17	-0.529609	0.595	0.812	5.29758e-13	2.23163e-18	-0.58883	0.8	0.881	4.54025e-14	4.1769e-13	-0.503145	0.8	0.867	8.4979e-09	1.94343e-37	-0.709119	0.709	0.868	3.9539e-33	7.82539e-05	1.55474e-36
Prkar1b	9.70347e-07	-0.549929	0.397	0.762	0.0197417	5.31448e-15	-0.72719	0.272	0.656	1.08123e-10	3.13425e-10	-0.55017	0.395	0.779	6.37663e-06	7.2366e-20	-0.703328	0.262	0.704	1.47229e-15	1.02442e-17	-0.600089	0.312	0.69	2.08419e-13	2.51488e-13	-0.591278	0.409	0.768	5.11652e-09	1.77115e-11	-0.524582	0.476	0.758	3.6034e-07	9.47775e-16	-0.460881	0.427	0.731	1.92825e-11	9.70347e-07	5.78928e-19
Rorb	2.45651e-05	-0.579952	0.086	0.386	0.499776	1.22358e-10	-0.682836	0.061	0.376	2.48938e-06	4.22499e-08	-0.652083	0.062	0.38	0.000859574	1.29921e-10	-0.603354	0.067	0.333	2.64324e-06	1.16051e-11	-0.590238	0.069	0.326	2.36106e-07	6.43122e-07	-0.593847	0.082	0.31	0.0130843	0.000115939	-0.438928	0.143	0.334	1	1.50654e-09	-0.411684	0.08	0.283	3.06505e-05	0.000115939	9.28408e-11
Slc25a4	1.9715e-09	-0.611508	0.397	0.811	4.01101e-05	6.50938e-12	-0.580718	0.395	0.728	1.32433e-07	1.12198e-07	-0.454331	0.617	0.822	0.00228267	3.51157e-22	-0.730394	0.356	0.771	7.14428e-18	1.55039e-24	-0.726027	0.347	0.752	3.15428e-20	8.90127e-17	-0.594434	0.536	0.843	1.81096e-12	9.11923e-13	-0.557087	0.467	0.801	1.85531e-08	5.04495e-31	-0.752784	0.357	0.753	1.02639e-26	1.12198e-07	4.03596e-30
Bex1	1.94717e-06	-0.482177	0.19	0.607	0.0396152	5.25721e-15	-0.653714	0.149	0.6	1.06958e-10	7.48161e-13	-0.66606	0.21	0.695	1.52213e-08	3.47519e-18	-0.569005	0.201	0.657	7.07028e-14	1.92182e-16	-0.560221	0.243	0.617	3.90995e-12	2.66692e-14	-0.597361	0.255	0.7	5.42585e-10	3.43821e-14	-0.640701	0.2	0.641	6.99504e-10	2.57884e-19	-0.514886	0.207	0.604	5.24666e-15	1.94717e-06	2.06307e-18
Tspyl4	6.67575e-09	-0.631388	0.259	0.721	0.000135818	7.38056e-13	-0.596405	0.254	0.647	1.50157e-08	2.68749e-06	-0.411313	0.444	0.748	0.0546771	6.29723e-16	-0.539682	0.268	0.688	1.28117e-11	1.12852e-14	-0.456131	0.289	0.663	2.29598e-10	3.91442e-13	-0.604194	0.345	0.74	7.9639e-09	1.85073e-06	-0.369118	0.533	0.738	0.037653	4.17287e-22	-0.606792	0.291	0.665	8.4897e-18	2.68749e-06	3.33829e-21
Tubb5	2.87964e-08	-0.661989	0.207	0.65	0.000585863	3.27936e-06	-0.281382	0.298	0.608	0.0667186	8.49802e-09	-0.512711	0.296	0.702	0.000172892	3.86353e-20	-0.669163	0.148	0.604	7.86035e-16	2.61562e-11	-0.366376	0.26	0.599	5.32148e-07	1.00329e-13	-0.6051	0.336	0.72	2.0412e-09	5.38383e-15	-0.67075	0.2	0.652	1.09534e-10	3.13868e-16	-0.440626	0.254	0.624	6.38565e-12	3.27936e-06	3.09082e-19
Necap1	2.87614e-10	-0.779713	0.086	0.57	5.85152e-06	3.13913e-11	-0.44033	0.123	0.504	6.38655e-07	2.99704e-07	-0.351532	0.235	0.602	0.00609747	1.17815e-18	-0.554424	0.114	0.554	2.39696e-14	7.72874e-15	-0.457358	0.173	0.531	1.57241e-10	5.24913e-15	-0.605306	0.182	0.61	1.06793e-10	2.74125e-13	-0.594701	0.171	0.594	5.57708e-09	1.22622e-19	-0.507648	0.164	0.557	2.49475e-15	2.99704e-07	9.80978e-19
Rpl29	9.27463e-08	-0.542631	0.431	0.813	0.00188692	1.52689e-22	-0.900158	0.316	0.776	3.10646e-18	6.24476e-18	-0.864366	0.42	0.845	1.2705e-13	2.83141e-22	-0.714529	0.342	0.784	5.7605e-18	5.04658e-17	-0.573066	0.445	0.751	1.02673e-12	1.84033e-17	-0.608316	0.445	0.819	3.74416e-13	5.5297e-14	-0.625651	0.486	0.792	1.12502e-09	7.74538e-28	-0.667345	0.333	0.751	1.5758e-23	9.27463e-08	6.1963e-27
Mtpn	3.95047e-10	-0.766228	0.172	0.675	8.03723e-06	1.37084e-19	-0.826308	0.07	0.564	2.78898e-15	8.11396e-15	-0.785652	0.136	0.641	1.65079e-10	4.59649e-23	-0.749068	0.121	0.609	9.35155e-19	1.65095e-22	-0.660713	0.133	0.569	3.35886e-18	1.09692e-15	-0.610255	0.145	0.594	2.23168e-11	2.25445e-20	-0.870986	0.114	0.636	4.58667e-16	1.38038e-26	-0.679428	0.136	0.57	2.80838e-22	3.95047e-10	1.1043e-25
Ftl1	9.27278e-10	-0.700147	0.466	0.864	1.88655e-05	2.82711e-19	-0.806838	0.377	0.77	5.75175e-15	3.67205e-09	-0.538447	0.556	0.838	7.47079e-05	3.34871e-18	-0.587868	0.322	0.766	6.81294e-14	1.60712e-22	-0.709083	0.405	0.758	3.26969e-18	2.39414e-14	-0.611908	0.564	0.836	4.87088e-10	7.6089e-23	-0.957255	0.314	0.789	1.54803e-18	1.06346e-21	-0.563892	0.484	0.796	2.16361e-17	3.67205e-09	6.08712e-22
Marcksl1	2.05798e-11	-0.846011	0.19	0.717	4.18695e-07	1.76563e-16	-0.68684	0.105	0.566	3.59217e-12	2.5746e-10	-0.597979	0.222	0.659	5.23802e-06	1.39136e-22	-0.699674	0.101	0.58	2.83071e-18	4.50743e-20	-0.583792	0.133	0.554	9.17037e-16	1.33404e-14	-0.612638	0.218	0.654	2.7141e-10	6.06578e-19	-0.790652	0.143	0.657	1.23408e-14	2.12488e-29	-0.746474	0.211	0.665	4.32307e-25	2.5746e-10	1.69991e-28
Polr1d	5.95867e-06	-0.441832	0.138	0.489	0.121229	4.7982e-11	-0.504791	0.14	0.511	9.76195e-07	2.91243e-08	-0.451376	0.185	0.58	0.000592535	1.81765e-15	-0.441661	0.094	0.479	3.69801e-11	2.21769e-13	-0.385607	0.133	0.461	4.5119e-09	7.12888e-16	-0.61332	0.127	0.583	1.45037e-11	1.19433e-07	-0.34258	0.19	0.532	0.00242986	6.01302e-16	-0.364888	0.113	0.44	1.22335e-11	5.95867e-06	4.81041e-15
Rpl36al	9.71652e-11	-0.792486	0.172	0.68	1.97683e-06	1.48741e-09	-0.398784	0.272	0.655	3.02614e-05	2.72451e-10	-0.555421	0.284	0.702	5.54301e-06	2.20592e-12	-0.399202	0.242	0.652	4.48794e-08	2.98246e-13	-0.439803	0.26	0.615	6.06781e-09	8.62265e-15	-0.614359	0.191	0.641	1.75428e-10	5.98756e-06	-0.269884	0.314	0.62	0.121817	3.23292e-22	-0.565721	0.197	0.614	6.57738e-18	5.98756e-06	2.58634e-21
Hpcal1	0.000894743	-0.344528	0.121	0.365	1	1.61867e-09	-0.493704	0.096	0.403	3.29318e-05	7.01091e-06	-0.392962	0.148	0.439	0.142637	3.55749e-13	-0.514523	0.067	0.382	7.23771e-09	5.7896e-11	-0.480976	0.075	0.32	1.1779e-06	6.72187e-10	-0.617511	0.145	0.459	1.36756e-05	5.13343e-10	-0.56785	0.124	0.462	1.0444e-05	4.81414e-17	-0.561812	0.089	0.397	9.79437e-13	0.000894743	3.85131e-16
Gng3	3.27629e-06	-0.463053	0.448	0.802	0.0666561	3.8405e-10	-0.402546	0.333	0.713	7.81351e-06	0.000107918	-0.328542	0.58	0.79	1	5.13208e-13	-0.369277	0.289	0.72	1.04412e-08	3.49912e-08	-0.269607	0.405	0.703	0.000711896	5.09732e-15	-0.618362	0.4	0.793	1.03705e-10	2.63444e-12	-0.552059	0.39	0.764	5.35977e-08	3.11592e-21	-0.535904	0.432	0.779	6.33934e-17	0.000107918	2.49274e-20
Hmgn1	2.019e-10	-0.792204	0.19	0.684	4.10765e-06	1.6973e-09	-0.51504	0.272	0.622	3.45316e-05	5.64744e-10	-0.50234	0.235	0.677	1.14897e-05	2.18737e-17	-0.527631	0.168	0.626	4.4502e-13	8.7071e-12	-0.358987	0.249	0.595	1.77146e-07	3.15449e-15	-0.621222	0.236	0.682	6.4178e-11	4.57958e-12	-0.545404	0.229	0.651	9.31717e-08	1.55724e-21	-0.56089	0.174	0.587	3.1682e-17	1.6973e-09	1.24579e-20
6330403K07Rik	7.25331e-13	-0.788218	0.621	0.891	1.47569e-08	2.0409e-11	-0.493156	0.728	0.858	4.15221e-07	3.90537e-15	-0.638834	0.753	0.908	7.94548e-11	2.49739e-14	-0.461961	0.671	0.871	5.08093e-10	2.66098e-15	-0.472653	0.63	0.837	5.41377e-11	3.4165e-20	-0.622642	0.718	0.91	6.95086e-16	3.03873e-18	-0.672317	0.819	0.872	6.1823e-14	2.77876e-23	-0.547306	0.648	0.859	5.65338e-19	2.0409e-11	2.223e-22
Ywhag	1.87654e-05	-0.404649	0.621	0.856	0.381781	4.16819e-13	-0.63489	0.474	0.743	8.48019e-09	3.71968e-09	-0.484842	0.605	0.842	7.56768e-05	7.03685e-15	-0.518807	0.47	0.794	1.43165e-10	4.0125e-17	-0.518047	0.543	0.759	8.16343e-13	2.1768e-15	-0.632639	0.527	0.807	4.4287e-11	3.35673e-13	-0.532054	0.686	0.827	6.82926e-09	1.27871e-23	-0.550924	0.596	0.819	2.60154e-19	1.87654e-05	1.02297e-22
Rpl18	4.63972e-08	-0.605455	0.31	0.748	0.000943951	2.61383e-16	-0.71263	0.325	0.736	5.31784e-12	9.03786e-17	-0.843777	0.383	0.807	1.83875e-12	4.53334e-20	-0.687352	0.315	0.745	9.22309e-16	1.67116e-22	-0.717456	0.295	0.719	3.39998e-18	2.48546e-15	-0.633238	0.445	0.796	5.05666e-11	6.66055e-14	-0.636673	0.438	0.774	1.35509e-09	1.81611e-23	-0.630183	0.3	0.705	3.69488e-19	4.63972e-08	1.45289e-22
Bex2	3.83594e-09	-0.520353	0.345	0.794	7.80423e-05	3.35452e-16	-0.686367	0.281	0.723	6.82477e-12	2.06261e-11	-0.597316	0.42	0.791	4.19639e-07	1.19593e-14	-0.504408	0.322	0.735	2.43312e-10	1.42615e-16	-0.533174	0.318	0.702	2.90151e-12	2.68172e-15	-0.641378	0.391	0.784	5.45595e-11	9.25347e-11	-0.473651	0.419	0.768	1.88262e-06	7.0357e-19	-0.498786	0.357	0.718	1.43141e-14	3.83594e-09	5.62856e-18
Clip3	2.5372e-11	-0.841174	0.172	0.679	5.16193e-07	3.97767e-22	-0.911996	0.053	0.576	8.09257e-18	3.23445e-11	-0.644194	0.259	0.687	6.58049e-07	2.0076e-17	-0.552831	0.181	0.62	4.08446e-13	3.28372e-21	-0.638855	0.179	0.6	6.68073e-17	4.44607e-15	-0.641392	0.236	0.666	9.04553e-11	5.53081e-20	-0.860617	0.162	0.655	1.12524e-15	5.68201e-21	-0.561919	0.272	0.661	1.15601e-16	3.23445e-11	3.18214e-21
Cox4i1	4.89188e-09	-0.558059	0.569	0.87	9.95254e-05	1.79737e-06	-0.318711	0.675	0.829	0.0365675	2.18559e-06	-0.336816	0.802	0.886	0.0444659	3.19493e-19	-0.575425	0.564	0.835	6.50009e-15	3.94645e-12	-0.392774	0.642	0.824	8.02905e-08	3.39616e-18	-0.651015	0.6	0.874	6.90949e-14	1.77462e-08	-0.341769	0.762	0.866	0.000361047	3.24847e-20	-0.460241	0.667	0.85	6.60901e-16	2.18559e-06	2.59878e-19
Map7d2	1.26739e-10	-0.798928	0.138	0.642	2.57851e-06	1.72936e-08	-0.395539	0.219	0.549	0.000351838	1.6292e-12	-0.711694	0.173	0.635	3.31461e-08	4.23565e-11	-0.369801	0.248	0.626	8.61744e-07	4.42384e-14	-0.417503	0.208	0.583	9.0003e-10	6.10111e-15	-0.651816	0.209	0.639	1.24127e-10	7.53027e-11	-0.519657	0.248	0.636	1.53203e-06	7.61785e-31	-0.771347	0.155	0.622	1.54985e-26	1.72936e-08	6.09428e-30
Ptma	2.75768e-12	-0.901228	0.345	0.811	5.6105e-08	1.18036e-16	-0.782781	0.333	0.735	2.40144e-12	1.22123e-14	-0.785754	0.321	0.796	2.4846e-10	1.70142e-13	-0.496761	0.336	0.747	3.46153e-09	5.27235e-23	-0.720344	0.295	0.723	1.07266e-18	1.36983e-15	-0.659661	0.409	0.792	2.78692e-11	9.68679e-14	-0.663267	0.419	0.777	1.97078e-09	1.50616e-20	-0.563822	0.366	0.744	3.06428e-16	2.75768e-12	4.21788e-22
Fth1	3.16448e-13	-0.713766	0.828	0.956	6.43814e-09	2.75536e-17	-0.625117	0.886	0.96	5.60578e-13	7.14191e-18	-0.589827	0.926	0.971	1.45302e-13	1.96556e-32	-0.745586	0.812	0.938	3.99894e-28	2.16246e-26	-0.542112	0.908	0.941	4.39953e-22	1.26694e-24	-0.659998	0.9	0.966	2.57759e-20	2.33306e-25	-0.796749	0.943	0.96	4.74661e-21	1.09705e-23	-0.415865	0.906	0.96	2.23195e-19	3.16448e-13	1.57245e-31
Rpl27a	4.99157e-12	-0.654227	0.759	0.927	1.01553e-07	3.01751e-23	-0.672675	0.825	0.936	6.13912e-19	1.77991e-24	-0.816018	0.864	0.959	3.62123e-20	5.66075e-31	-0.691116	0.792	0.925	1.15168e-26	3.72805e-30	-0.643512	0.757	0.924	7.58472e-26	2.91896e-26	-0.660547	0.918	0.95	5.93863e-22	1.21986e-23	-0.709294	0.876	0.934	2.48181e-19	5.75636e-42	-0.787496	0.643	0.877	1.17113e-37	4.99157e-12	4.60509e-41
Gm10076	5.91112e-06	-0.46952	0.086	0.41	0.120262	3.94598e-09	-0.290746	0.07	0.37	8.02811e-05	1.54402e-09	-0.505936	0.185	0.604	3.14132e-05	1.29318e-14	-0.429209	0.074	0.424	2.63098e-10	5.07517e-11	-0.319419	0.145	0.443	1.03254e-06	4.74058e-17	-0.663799	0.173	0.638	9.64472e-13	1.33287e-08	-0.38062	0.2	0.552	0.000271173	1.55944e-32	-0.795993	0.286	0.737	3.17268e-28	5.91112e-06	1.24755e-31
Flywch1	1.56296e-07	-0.623679	0.19	0.597	0.00317984	1.29203e-07	-0.352354	0.219	0.55	0.00262863	9.40355e-06	-0.407989	0.309	0.635	0.191315	9.374e-14	-0.446465	0.215	0.633	1.90714e-09	9.34847e-15	-0.482542	0.197	0.57	1.90195e-10	1.22154e-15	-0.671057	0.227	0.66	2.48523e-11	4.43152e-07	-0.392164	0.362	0.661	0.00901593	6.12616e-21	-0.576055	0.235	0.626	1.24637e-16	9.40355e-06	4.90093e-20
Dynll2	0.000293166	-0.32226	0.621	0.841	1	2.75738e-12	-0.574269	0.474	0.739	5.6099e-08	1.14167e-07	-0.429687	0.63	0.838	0.00232273	8.04031e-15	-0.536734	0.436	0.765	1.6358e-10	7.79677e-14	-0.424789	0.526	0.769	1.58625e-09	1.52973e-18	-0.67791	0.6	0.827	3.11223e-14	5.84265e-16	-0.648246	0.533	0.82	1.18869e-11	8.06878e-34	-0.737261	0.507	0.814	1.64159e-29	0.000293166	6.45503e-33
Marcks	1.57146e-09	-0.700112	0.328	0.774	3.19713e-05	7.00766e-13	-0.62715	0.228	0.626	1.42571e-08	3.03417e-08	-0.547719	0.407	0.728	0.000617302	4.09971e-19	-0.701064	0.242	0.675	8.34086e-15	2.70187e-13	-0.495271	0.324	0.646	5.49695e-09	6.666e-15	-0.6811	0.255	0.681	1.3562e-10	2.28123e-12	-0.633918	0.333	0.699	4.64116e-08	7.16699e-16	-0.469509	0.352	0.694	1.45812e-11	3.03417e-08	3.27977e-18
Hap1	1.1159e-12	-0.852991	0.431	0.848	2.2703e-08	2.13979e-16	-0.621043	0.465	0.794	4.35341e-12	4.00267e-14	-0.711534	0.519	0.851	8.14343e-10	5.96694e-19	-0.620904	0.43	0.797	1.21397e-14	2.74772e-25	-0.752783	0.416	0.761	5.59024e-21	1.80925e-18	-0.681201	0.564	0.845	3.68092e-14	7.97676e-17	-0.662931	0.571	0.846	1.62287e-12	3.92682e-26	-0.581019	0.587	0.846	7.98912e-22	1.1159e-12	3.14146e-25
Slc17a6	0.00127362	-0.537143	0.034	0.214	1	5.57784e-11	-0.9165	0.018	0.311	1.13481e-06	4.47349e-07	-0.810717	0.025	0.284	0.00910132	4.78889e-10	-0.653935	0.047	0.288	9.74299e-06	8.37183e-14	-0.867128	0.023	0.287	1.70325e-09	7.51313e-09	-0.691922	0.036	0.3	0.000152855	2.45883e-09	-0.849243	0.067	0.352	5.00248e-05	4.07622e-21	-0.95017	0.042	0.371	8.29308e-17	0.00127362	3.26098e-20
Gap43	3.75722e-14	-1.00533	0.431	0.821	7.64406e-10	2.87451e-13	-0.694265	0.474	0.733	5.8482e-09	1.27253e-14	-0.768312	0.556	0.835	2.58895e-10	1.38069e-23	-0.794045	0.45	0.78	2.80902e-19	3.52258e-27	-0.858321	0.445	0.758	7.16669e-23	1.69879e-17	-0.692832	0.545	0.842	3.45619e-13	7.0364e-22	-0.922177	0.514	0.811	1.43156e-17	2.87951e-24	-0.667192	0.441	0.747	5.85836e-20	2.87451e-13	2.81806e-26
Vat1	2.97334e-06	-0.463407	0.241	0.631	0.0604926	7.55699e-17	-0.740682	0.132	0.584	1.53747e-12	3.60249e-08	-0.512525	0.296	0.666	0.000732926	3.97644e-17	-0.593918	0.168	0.592	8.09007e-13	3.50254e-15	-0.466501	0.191	0.576	7.12591e-11	7.61291e-17	-0.694107	0.218	0.67	1.54885e-12	6.08277e-14	-0.661114	0.219	0.654	1.23754e-09	4.0205e-15	-0.453741	0.277	0.626	8.17971e-11	2.97334e-06	3.18115e-16
Tmsb10	1.08959e-14	-0.796764	0.776	0.939	2.21676e-10	8.38488e-19	-0.762886	0.64	0.844	1.7059e-14	1.41164e-14	-0.64434	0.79	0.912	2.87198e-10	8.18911e-25	-0.737932	0.55	0.848	1.66608e-20	1.10804e-25	-0.614131	0.728	0.879	2.2543e-21	3.90781e-21	-0.695542	0.755	0.899	7.95044e-17	9.34624e-20	-0.726186	0.657	0.896	1.90149e-15	3.77325e-38	-0.679443	0.906	0.939	7.67668e-34	1.41164e-14	3.0186e-37
Cox7a2l	9.19703e-11	-0.78455	0.259	0.767	1.87114e-06	4.35867e-16	-0.729832	0.342	0.727	8.86771e-12	7.64374e-19	-0.896402	0.42	0.83	1.55512e-14	6.66736e-25	-0.823403	0.322	0.757	1.35647e-20	6.47525e-23	-0.716842	0.422	0.745	1.31739e-18	9.8915e-18	-0.698226	0.509	0.822	2.01243e-13	1.04713e-17	-0.744339	0.457	0.796	2.1304e-13	8.86477e-30	-0.76732	0.305	0.724	1.80354e-25	9.19703e-11	7.09182e-29
Rplp1	1.62307e-13	-0.652052	0.793	0.926	3.30214e-09	2.80594e-17	-0.584384	0.781	0.932	5.70868e-13	1.05959e-14	-0.521583	0.938	0.962	2.15574e-10	2.67492e-30	-0.687668	0.872	0.929	5.44212e-26	1.59771e-30	-0.631158	0.827	0.931	3.25055e-26	1.30313e-26	-0.699768	0.873	0.951	2.65121e-22	1.10035e-23	-0.666122	0.933	0.947	2.23867e-19	6.13244e-38	-0.709376	0.7	0.861	1.24764e-33	1.62307e-13	4.90595e-37
Cbx3	1.10468e-08	-0.74145	0.121	0.566	0.000224748	4.69183e-06	-0.303947	0.263	0.569	0.0954552	0.000946745	-0.271058	0.333	0.605	1	1.63054e-12	-0.553009	0.201	0.568	3.31733e-08	3.41626e-07	-0.349957	0.301	0.567	0.00695038	6.44581e-13	-0.700801	0.255	0.654	1.3114e-08	9.37462e-09	-0.538122	0.267	0.615	0.000190727	6.60988e-23	-0.747529	0.239	0.642	1.34478e-18	0.000946745	5.2879e-22
Calm2	2.27156e-06	-0.378102	0.707	0.903	0.0462149	6.54659e-16	-0.578191	0.579	0.846	1.3319e-11	7.09351e-09	-0.377037	0.802	0.894	0.000144317	1.53812e-17	-0.499334	0.631	0.854	3.12931e-13	1.08867e-15	-0.413296	0.723	0.86	2.21489e-11	7.68279e-24	-0.702449	0.655	0.873	1.56306e-19	1.7679e-17	-0.569049	0.743	0.875	3.59678e-13	1.3701e-25	-0.539277	0.615	0.84	2.78747e-21	2.27156e-06	1.09608e-24
Tubb4a	4.76106e-11	-0.831474	0.121	0.631	9.68637e-07	4.69209e-16	-0.756272	0.079	0.513	9.54606e-12	1.36495e-15	-0.789606	0.099	0.616	2.77698e-11	8.50478e-23	-0.704626	0.087	0.548	1.7303e-18	7.25145e-19	-0.590182	0.133	0.531	1.47531e-14	1.41526e-17	-0.70769	0.155	0.629	2.87934e-13	1.45095e-13	-0.684139	0.171	0.597	2.95196e-09	7.57532e-12	-0.340248	0.286	0.623	1.5412e-07	4.76106e-11	6.80383e-22
Rpl5	1.64301e-06	-0.490439	0.276	0.684	0.033427	1.04193e-15	-0.641698	0.263	0.705	2.11981e-11	3.32002e-15	-0.798578	0.346	0.781	6.75458e-11	2.01163e-20	-0.693255	0.262	0.734	4.09267e-16	2.31076e-20	-0.617737	0.254	0.683	4.70125e-16	3.67049e-18	-0.715661	0.409	0.777	7.46762e-14	3.39893e-13	-0.601473	0.381	0.757	6.91512e-09	9.5193e-23	-0.575492	0.192	0.622	1.9367e-18	1.64301e-06	7.61544e-22
Rpl22	3.71726e-08	-0.309072	0.138	0.595	0.000756276	1.1031e-10	-0.498022	0.219	0.602	2.24425e-06	3.2336e-10	-0.579033	0.259	0.694	6.57876e-06	2.08323e-21	-0.648622	0.141	0.626	4.23832e-17	3.88135e-14	-0.481101	0.225	0.597	7.8966e-10	2.84941e-17	-0.716187	0.2	0.66	5.79713e-13	3.42468e-09	-0.379224	0.267	0.657	6.96751e-05	7.04967e-22	-0.508086	0.127	0.535	1.43425e-17	3.71726e-08	5.63973e-21
Hp1bp3	1.10681e-06	-0.557376	0.276	0.661	0.022518	2.0494e-13	-0.494803	0.158	0.583	4.16951e-09	3.82554e-06	-0.371213	0.321	0.678	0.0778307	1.72384e-16	-0.525217	0.208	0.656	3.50715e-12	1.17123e-17	-0.552059	0.202	0.609	2.38286e-13	1.47602e-18	-0.718915	0.155	0.644	3.00295e-14	8.76413e-09	-0.434806	0.333	0.672	0.000178306	1.6662e-15	-0.439108	0.249	0.614	3.38987e-11	3.82554e-06	1.18081e-17
Ctxn1	2.4002e-13	-1.10136	0.069	0.614	4.88321e-09	3.93397e-12	-0.618929	0.158	0.547	8.00366e-08	7.81809e-18	-1.01654	0.111	0.648	1.59059e-13	6.10506e-18	-0.594364	0.134	0.563	1.24208e-13	8.08367e-24	-0.836648	0.11	0.539	1.64462e-19	7.52557e-17	-0.720879	0.191	0.644	1.53108e-12	1.76984e-17	-0.833226	0.124	0.596	3.60074e-13	5.72253e-23	-0.664059	0.164	0.565	1.16425e-18	3.93397e-12	6.46694e-23
Rpl13a	2.62283e-09	-0.711358	0.328	0.781	5.33614e-05	2.69578e-17	-0.78463	0.325	0.705	5.48457e-13	3.35653e-22	-1.10876	0.309	0.792	6.82887e-18	1.09219e-27	-0.939893	0.242	0.737	2.22205e-23	1.05855e-25	-0.810768	0.347	0.727	2.15362e-21	5.82367e-19	-0.723665	0.4	0.79	1.18483e-14	2.89596e-19	-0.868967	0.333	0.743	5.89184e-15	3.88414e-42	-1.04194	0.16	0.696	7.90229e-38	2.62283e-09	3.10731e-41
Rpsa	1.6059e-12	-0.868382	0.397	0.823	3.26721e-08	6.83461e-21	-0.826697	0.491	0.803	1.3905e-16	6.77583e-16	-0.728055	0.63	0.87	1.37854e-11	9.08301e-28	-0.879592	0.396	0.798	1.84794e-23	1.21033e-27	-0.807765	0.439	0.785	2.46242e-23	1.54399e-20	-0.724795	0.636	0.858	3.14124e-16	1.08738e-25	-0.960848	0.495	0.83	2.21227e-21	2.61249e-25	-0.681651	0.357	0.744	5.31511e-21	1.6059e-12	7.26641e-27
Rps13	1.24678e-13	-0.869172	0.431	0.855	2.53658e-09	6.65888e-25	-0.895053	0.482	0.835	1.35475e-20	4.30669e-21	-0.873147	0.679	0.884	8.76196e-17	3.06421e-33	-0.946377	0.409	0.834	6.23414e-29	3.78501e-30	-0.759129	0.549	0.833	7.7006e-26	3.47376e-22	-0.732572	0.655	0.871	7.06736e-18	1.76892e-25	-0.886803	0.6	0.862	3.59887e-21	5.10811e-33	-0.768511	0.479	0.802	1.03924e-28	1.24678e-13	2.45137e-32
Ncl	4.3651e-06	-0.460511	0.155	0.52	0.088808	1.65049e-07	-0.29503	0.193	0.514	0.00335793	5.67095e-07	-0.38557	0.235	0.604	0.0115375	5.22389e-15	-0.448727	0.154	0.563	1.0628e-10	1.70242e-16	-0.478407	0.139	0.517	3.46358e-12	2.52904e-18	-0.735997	0.136	0.609	5.14533e-14	5.22272e-10	-0.428299	0.2	0.583	1.06256e-05	5.10556e-21	-0.499177	0.113	0.503	1.03873e-16	4.3651e-06	4.08445e-20
Rpl8	3.27567e-13	-0.77591	0.69	0.902	6.66435e-09	3.22021e-21	-0.710626	0.798	0.911	6.55151e-17	8.99277e-25	-0.849211	0.864	0.954	1.82958e-20	5.83571e-37	-0.910509	0.718	0.896	1.18727e-32	2.30465e-38	-0.82702	0.798	0.908	4.68881e-34	8.37899e-29	-0.740824	0.909	0.944	1.70471e-24	1.48675e-29	-0.871205	0.8	0.931	3.02479e-25	6.65136e-43	-0.846485	0.629	0.865	1.35322e-38	3.27567e-13	5.32109e-42
Calm1	1.5653e-07	-0.521142	0.603	0.849	0.0031846	1.67723e-19	-0.833836	0.404	0.759	3.41231e-15	3.39353e-12	-0.577895	0.593	0.862	6.90414e-08	1.0365e-22	-0.704007	0.423	0.797	2.10875e-18	9.95783e-18	-0.530027	0.503	0.784	2.02592e-13	4.60332e-21	-0.746825	0.536	0.829	9.36545e-17	3.0078e-19	-0.689751	0.667	0.836	6.11938e-15	3.45675e-32	-0.655177	0.643	0.839	7.03275e-28	1.5653e-07	2.7654e-31
Eef1g	8.87999e-17	-1.06822	0.397	0.852	1.80663e-12	1.69471e-22	-0.881025	0.535	0.816	3.44789e-18	4.74567e-19	-0.81708	0.617	0.882	9.65506e-15	3.97356e-33	-0.971704	0.416	0.815	8.0842e-29	1.05225e-25	-0.732315	0.503	0.807	2.1408e-21	3.41642e-24	-0.747547	0.691	0.889	6.95071e-20	1.23119e-22	-0.832446	0.581	0.848	2.50486e-18	4.17028e-27	-0.703739	0.441	0.777	8.48443e-23	8.87999e-17	3.17884e-32
Ywhab	8.72699e-12	-0.799133	0.483	0.838	1.77551e-07	4.16334e-18	-0.879703	0.351	0.704	8.47032e-14	3.52486e-18	-0.909487	0.407	0.813	7.17134e-14	3.40469e-25	-0.790563	0.403	0.76	6.92684e-21	2.83763e-18	-0.623194	0.468	0.739	5.77315e-14	2.55003e-18	-0.75254	0.455	0.789	5.18803e-14	1.25471e-17	-0.741154	0.543	0.79	2.55272e-13	1.96746e-38	-0.897456	0.39	0.752	4.00281e-34	8.72699e-12	1.57397e-37
Ywhah	1.60308e-13	-0.89652	0.379	0.834	3.26147e-09	1.25829e-17	-0.816316	0.395	0.723	2.55999e-13	2.24753e-09	-0.519592	0.519	0.82	4.57261e-05	8.87523e-28	-0.891222	0.295	0.764	1.80566e-23	2.3337e-23	-0.73274	0.37	0.738	4.74791e-19	7.91229e-20	-0.752741	0.5	0.813	1.60976e-15	1.21407e-20	-0.855815	0.429	0.799	2.47002e-16	1.8455e-31	-0.727768	0.446	0.772	3.75467e-27	2.24753e-09	1.4764e-30
Rps10	1.03701e-11	-0.829792	0.379	0.816	2.1098e-07	8.759e-20	-0.810082	0.456	0.794	1.78202e-15	1.04349e-22	-0.993186	0.543	0.876	2.12298e-18	1.67969e-34	-1.0021	0.403	0.815	3.41734e-30	1.09308e-28	-0.78381	0.509	0.799	2.22387e-24	2.24203e-21	-0.757736	0.6	0.849	4.5614e-17	1.19362e-27	-1.00318	0.514	0.842	2.42842e-23	3.07176e-38	-0.924637	0.244	0.732	6.2495e-34	1.03701e-11	2.45741e-37
Rpl15	7.86123e-15	-0.989453	0.31	0.833	1.59937e-10	9.35109e-14	-0.613428	0.518	0.78	1.90248e-09	4.27448e-22	-1.01809	0.432	0.862	8.69643e-18	1.33764e-21	-0.683957	0.409	0.796	2.72143e-17	2.25817e-22	-0.680433	0.486	0.779	4.59426e-18	1.40457e-21	-0.761607	0.582	0.844	2.85759e-17	5.75097e-23	-0.873858	0.486	0.833	1.17004e-18	3.16255e-30	-0.745807	0.418	0.782	6.4342e-26	9.35109e-14	2.53004e-29
Set	1.86404e-10	-0.8107	0.241	0.737	3.7924e-06	2.70003e-14	-0.689002	0.246	0.664	5.4932e-10	2.82212e-13	-0.702796	0.296	0.75	5.7416e-09	3.04828e-18	-0.597024	0.242	0.707	6.20173e-14	9.40067e-19	-0.627643	0.289	0.676	1.91257e-14	4.12738e-20	-0.770683	0.318	0.784	8.39715e-16	1.13268e-15	-0.693745	0.371	0.751	2.30445e-11	9.16624e-29	-0.763522	0.272	0.699	1.86487e-24	1.86404e-10	7.33299e-28
Selenow	1.17724e-14	-0.861482	0.586	0.898	2.39509e-10	9.30816e-17	-0.707311	0.544	0.804	1.89375e-12	2.49848e-22	-0.929479	0.642	0.89	5.08316e-18	1.71012e-26	-0.823927	0.436	0.807	3.47924e-22	4.61011e-24	-0.685801	0.566	0.811	9.37927e-20	5.14189e-23	-0.772182	0.618	0.858	1.04612e-18	1.3928e-21	-0.765245	0.695	0.856	2.83366e-17	2.50823e-42	-0.717222	0.761	0.915	5.103e-38	1.17724e-14	2.00659e-41
Rpl24	8.06864e-14	-0.755684	0.621	0.909	1.64156e-09	2.07026e-16	-0.572799	0.816	0.904	4.21194e-12	1.77712e-22	-0.784676	0.852	0.949	3.61555e-18	1.52253e-33	-0.83586	0.651	0.896	3.09759e-29	3.69027e-29	-0.651233	0.769	0.897	7.50786e-25	1.58101e-26	-0.778196	0.782	0.918	3.21656e-22	1.45927e-27	-0.837165	0.8	0.914	2.96889e-23	8.94782e-51	-1.02615	0.474	0.86	1.82043e-46	8.06864e-14	7.15826e-50
Zwint	1.66586e-12	-0.771141	0.534	0.853	3.3892e-08	4.8016e-15	-0.64459	0.5	0.774	9.76886e-11	6.44409e-08	-0.424387	0.691	0.856	0.00131105	2.7049e-27	-0.840307	0.416	0.798	5.50312e-23	9.60385e-22	-0.649413	0.52	0.78	1.9539e-17	6.03115e-22	-0.782265	0.573	0.832	1.22704e-17	1.40038e-16	-0.645035	0.648	0.837	2.84907e-12	3.19981e-26	-0.605292	0.592	0.823	6.51001e-22	6.44409e-08	2.16392e-26
Rpl10a	6.36073e-08	-0.575393	0.466	0.83	0.00129409	3.88107e-15	-0.610888	0.561	0.812	7.89604e-11	2.4241e-18	-0.787945	0.593	0.879	4.93184e-14	4.15091e-20	-0.654901	0.45	0.806	8.44503e-16	1.26174e-23	-0.660917	0.451	0.803	2.56702e-19	1.19225e-23	-0.782494	0.591	0.879	2.42562e-19	9.43511e-16	-0.61754	0.619	0.844	1.91957e-11	1.69968e-20	-0.525371	0.474	0.803	3.458e-16	6.36073e-08	9.53797e-23
Hnrnpa1	1.40663e-08	-0.619991	0.224	0.711	0.000286179	1.15662e-11	-0.512689	0.254	0.662	2.35315e-07	1.2659e-09	-0.55195	0.383	0.766	2.57546e-05	6.97567e-22	-0.726976	0.221	0.708	1.4192e-17	2.70415e-19	-0.610097	0.266	0.676	5.5016e-15	2.10591e-19	-0.782648	0.264	0.732	4.28447e-15	1.12631e-15	-0.647648	0.295	0.725	2.29147e-11	6.44022e-25	-0.6227	0.202	0.638	1.31026e-20	1.40663e-08	5.15217e-24
Rpl31	2.75934e-11	-0.674242	0.569	0.924	5.61387e-07	2.161e-17	-0.597887	0.746	0.889	4.39656e-13	2.07279e-17	-0.666296	0.827	0.932	4.2171e-13	7.80506e-29	-0.726766	0.617	0.895	1.58794e-24	5.12418e-23	-0.549964	0.734	0.885	1.04251e-18	5.19464e-28	-0.784748	0.718	0.915	1.05685e-23	9.64897e-24	-0.735986	0.714	0.908	1.96308e-19	1.37752e-27	-0.5789	0.643	0.852	2.80255e-23	2.75934e-11	6.24405e-28
Pcp4	2.16116e-06	-0.83348	0.569	0.813	0.0439688	3.49231e-10	-0.809356	0.684	0.854	7.10511e-06	8.08895e-11	-0.980769	0.679	0.856	1.6457e-06	3.24782e-13	-0.718937	0.557	0.805	6.60768e-09	2.28141e-14	-0.703334	0.665	0.846	4.64153e-10	2.72301e-10	-0.785135	0.645	0.822	5.53997e-06	1.58419e-12	-0.892961	0.762	0.873	3.22304e-08	1.67033e-20	-0.743393	0.62	0.83	3.39828e-16	2.16116e-06	1.33626e-19
Fau	6.50818e-15	-0.823638	0.621	0.925	1.32409e-10	1.72078e-24	-0.790835	0.746	0.917	3.50093e-20	4.77119e-21	-0.724372	0.889	0.949	9.70699e-17	7.85705e-40	-0.918913	0.711	0.906	1.59852e-35	1.74954e-36	-0.738282	0.821	0.92	3.55944e-32	4.66717e-27	-0.787191	0.836	0.926	9.49536e-23	9.68495e-33	-0.980278	0.771	0.928	1.9704e-28	1.52315e-49	-0.925752	0.629	0.88	3.09884e-45	6.50818e-15	1.21852e-48
Eef1b2	6.52363e-10	-0.691736	0.138	0.625	1.32723e-05	1.30629e-17	-0.792621	0.175	0.636	2.65765e-13	1.39186e-12	-0.733979	0.272	0.715	2.83173e-08	1.77872e-25	-0.833055	0.148	0.667	3.61881e-21	1.06258e-27	-0.852469	0.15	0.622	2.16183e-23	4.99901e-19	-0.794018	0.273	0.721	1.01705e-14	5.30852e-17	-0.776178	0.229	0.687	1.08002e-12	1.26709e-19	-0.508309	0.16	0.544	2.5779e-15	6.52363e-10	8.50067e-27
Peg3	2.37279e-16	-0.949638	0.552	0.881	4.82745e-12	6.13593e-20	-0.804082	0.535	0.819	1.24836e-15	8.49027e-13	-0.544836	0.79	0.893	1.72735e-08	6.21837e-29	-0.772422	0.57	0.849	1.26513e-24	5.40552e-24	-0.662182	0.584	0.824	1.09975e-19	8.64414e-25	-0.796334	0.655	0.86	1.75865e-20	4.95034e-20	-0.647783	0.781	0.892	1.00715e-15	1.4327e-27	-0.525312	0.756	0.871	2.91482e-23	8.49027e-13	4.9747e-28
Eif4a2	4.97993e-09	-0.666954	0.69	0.858	0.000101317	1.97249e-16	-0.712586	0.553	0.84	4.01304e-12	1.72064e-16	-0.778702	0.63	0.896	3.50065e-12	4.04642e-33	-0.98942	0.436	0.83	8.23245e-29	6.59064e-21	-0.634926	0.601	0.821	1.34087e-16	2.461e-23	-0.798438	0.682	0.88	5.00691e-19	7.49612e-16	-0.631203	0.752	0.865	1.52509e-11	1.49998e-31	-0.732134	0.624	0.842	3.05172e-27	4.97993e-09	3.23714e-32
Pak3	6.44966e-08	-0.593068	0.31	0.735	0.00131218	7.2629e-12	-0.631986	0.298	0.66	1.47764e-07	4.91764e-12	-0.680685	0.321	0.753	1.00049e-07	6.07098e-11	-0.437306	0.329	0.708	1.23514e-06	1.23885e-09	-0.371977	0.358	0.65	2.52045e-05	2.48973e-19	-0.798957	0.291	0.744	5.06535e-15	2.50806e-10	-0.509066	0.448	0.76	5.10265e-06	4.3788e-25	-0.65789	0.3	0.716	8.90867e-21	6.44966e-08	3.50304e-24
Stmn1	5.77783e-11	-0.800283	0.207	0.725	1.1755e-06	7.28915e-14	-0.710906	0.254	0.644	1.48298e-09	7.63911e-14	-0.782901	0.259	0.717	1.55418e-09	1.8934e-21	-0.765821	0.215	0.681	3.85212e-17	7.45396e-22	-0.712649	0.231	0.643	1.51651e-17	5.28295e-18	-0.813884	0.282	0.713	1.07482e-13	2.697e-16	-0.753082	0.257	0.714	5.48704e-12	1.2293e-22	-0.617609	0.249	0.66	2.501e-18	5.77783e-11	9.83437e-22
Rps4x	3.04996e-19	-1.18789	0.534	0.88	6.20514e-15	2.21866e-23	-0.898006	0.675	0.865	4.51387e-19	1.44427e-26	-1.09984	0.691	0.914	2.93837e-22	5.95225e-39	-1.12869	0.497	0.849	1.21099e-34	6.52602e-43	-1.04648	0.624	0.853	1.32772e-38	1.63851e-28	-0.816039	0.864	0.911	3.33356e-24	1.32006e-33	-1.21649	0.6	0.884	2.68566e-29	2.20572e-44	-1.03154	0.469	0.806	4.48754e-40	3.04996e-19	1.76458e-43
Eef1a1	3.14412e-21	-1.24021	0.655	0.919	6.39671e-17	3.07203e-29	-1.04661	0.807	0.929	6.25005e-25	7.22366e-26	-1.019	0.889	0.958	1.46965e-21	7.88643e-42	-1.14129	0.711	0.907	1.60449e-37	1.18232e-43	-1.04415	0.751	0.91	2.40544e-39	1.09754e-32	-0.821683	0.945	0.968	2.23294e-28	1.71727e-35	-1.21072	0.829	0.935	3.49378e-31	2.14036e-52	-1.11257	0.629	0.875	4.35457e-48	3.14412e-21	1.71229e-51
Rpl18a	1.33271e-12	-0.701647	0.69	0.905	2.7114e-08	3.73706e-23	-0.77244	0.746	0.883	7.60305e-19	1.50123e-24	-0.876264	0.815	0.93	3.05426e-20	4.6949e-30	-0.780141	0.658	0.877	9.55177e-26	2.52016e-31	-0.696514	0.751	0.891	5.12726e-27	1.14418e-27	-0.822733	0.773	0.911	2.32784e-23	4.07708e-31	-0.969647	0.752	0.897	8.29482e-27	2.46242e-42	-0.849389	0.61	0.854	5.00979e-38	1.33271e-12	1.96993e-41
Rpl7	4.6883e-16	-1.11633	0.207	0.802	9.53835e-12	6.05037e-12	-0.47795	0.526	0.787	1.23095e-07	4.50853e-20	-0.912511	0.457	0.87	9.1726e-16	1.15085e-27	-0.821937	0.43	0.811	2.3414e-23	3.93543e-21	-0.614144	0.48	0.79	8.00662e-17	5.03864e-26	-0.827282	0.6	0.869	1.02511e-21	6.50409e-24	-0.886843	0.505	0.831	1.32326e-19	2.16221e-17	-0.504839	0.399	0.736	4.39901e-13	6.05037e-12	9.20679e-27
Uqcrh	2.77261e-10	-0.724821	0.466	0.83	5.64087e-06	2.12585e-16	-0.722046	0.447	0.763	4.32504e-12	4.28629e-20	-0.931832	0.469	0.843	8.72045e-16	3.02487e-34	-1.03672	0.315	0.786	6.1541e-30	3.78172e-20	-0.551317	0.486	0.776	7.6939e-16	7.24875e-22	-0.841628	0.436	0.812	1.47476e-17	6.42819e-18	-0.724213	0.571	0.817	1.30782e-13	2.01377e-28	-0.688374	0.427	0.773	4.09702e-24	2.77261e-10	2.4199e-33
Rpl13	1.08537e-20	-0.981998	0.776	0.943	2.20818e-16	7.85146e-29	-0.879575	0.851	0.948	1.59738e-24	3.35123e-27	-0.918686	0.901	0.969	6.81808e-23	4.78932e-38	-0.87174	0.792	0.94	9.74386e-34	5.53405e-43	-0.863962	0.85	0.935	1.1259e-38	9.75464e-34	-0.842285	0.927	0.964	1.98458e-29	9.19307e-34	-0.982747	0.924	0.955	1.87033e-29	1.63926e-47	-0.829296	0.822	0.919	3.33508e-43	1.08537e-20	1.31141e-46
Rps15	1.08276e-17	-0.972317	0.552	0.912	2.20288e-13	2.35981e-25	-0.773769	0.763	0.911	4.80103e-21	8.09029e-24	-0.792328	0.852	0.955	1.64597e-19	8.82043e-36	-0.839029	0.718	0.906	1.79452e-31	4.18138e-40	-0.772635	0.798	0.92	8.50703e-36	2.06341e-32	-0.849961	0.818	0.934	4.198e-28	1.45248e-27	-0.80452	0.829	0.928	2.95507e-23	1.25483e-30	-0.604419	0.732	0.883	2.55294e-26	1.08276e-17	3.34511e-39
Rplp2	4.35055e-09	-0.561419	0.707	0.884	8.8512e-05	1.90926e-20	-0.76068	0.614	0.856	3.88439e-16	7.20948e-21	-0.874521	0.704	0.915	1.46677e-16	6.72255e-37	-1.00287	0.503	0.851	1.3677e-32	5.3387e-32	-0.776761	0.642	0.866	1.08616e-27	3.71221e-27	-0.852043	0.709	0.889	7.55248e-23	1.05114e-21	-0.766188	0.686	0.877	2.13854e-17	1.54998e-38	-0.871268	0.479	0.815	3.15344e-34	4.35055e-09	1.23999e-37
Rpl6	1.21477e-20	-1.17547	0.534	0.914	2.47146e-16	2.39802e-24	-0.840844	0.693	0.906	4.87877e-20	7.2123e-27	-1.05114	0.691	0.942	1.46734e-22	3.13529e-37	-0.894547	0.765	0.905	6.37874e-33	9.40455e-38	-0.813972	0.786	0.911	1.91336e-33	2.57572e-31	-0.852818	0.864	0.94	5.2403e-27	6.0343e-34	-1.10076	0.695	0.913	1.22768e-29	6.32377e-49	-0.970782	0.629	0.871	1.28657e-44	1.21477e-20	5.05902e-48
Rpl23a	1.0837e-15	-0.832376	0.707	0.92	2.20478e-11	1.05217e-25	-0.810587	0.807	0.927	2.14064e-21	5.23411e-20	-0.728011	0.84	0.955	1.06488e-15	1.74175e-36	-0.833172	0.772	0.913	3.54359e-32	9.67222e-29	-0.636039	0.798	0.912	1.96781e-24	1.63943e-32	-0.854405	0.9	0.942	3.33543e-28	1.76158e-27	-0.86303	0.81	0.927	3.58394e-23	4.81219e-43	-0.865822	0.667	0.863	9.7904e-39	1.0837e-15	3.84975e-42
Rpl30	4.01857e-11	-0.762185	0.397	0.835	8.17578e-07	4.32616e-23	-0.896904	0.491	0.812	8.80157e-19	2.76252e-25	-1.0661	0.556	0.877	5.62035e-21	7.36264e-32	-0.915068	0.443	0.826	1.49793e-27	3.16447e-29	-0.768429	0.491	0.816	6.43811e-25	3.92006e-24	-0.854722	0.573	0.852	7.97536e-20	2.37361e-28	-1.03286	0.505	0.842	4.82911e-24	7.58326e-32	-0.774718	0.347	0.757	1.54281e-27	4.01857e-11	5.89011e-31
Rpl4	6.58667e-15	-1.00538	0.379	0.841	1.34006e-10	9.41822e-19	-0.749356	0.614	0.816	1.91614e-14	3.05097e-21	-0.882428	0.642	0.885	6.2072e-17	2.34986e-32	-0.968315	0.409	0.807	4.78079e-28	4.0642e-34	-0.886928	0.474	0.808	8.26861e-30	1.42991e-27	-0.866213	0.664	0.878	2.90915e-23	3.53053e-26	-0.938654	0.562	0.848	7.18286e-22	1.35765e-34	-0.800578	0.394	0.787	2.76214e-30	6.58667e-15	1.08612e-33
Npm1	5.52968e-13	-1.03741	0.224	0.736	1.12501e-08	1.12845e-17	-0.827094	0.281	0.716	2.29584e-13	1.25663e-19	-0.993779	0.383	0.814	2.55661e-15	2.37712e-20	-0.696076	0.315	0.747	4.83625e-16	1.23011e-23	-0.756568	0.318	0.717	2.50265e-19	5.82965e-24	-0.879064	0.345	0.826	1.18604e-19	6.31912e-19	-0.845229	0.352	0.759	1.28562e-14	1.15432e-34	-0.901173	0.174	0.66	2.34847e-30	5.52968e-13	9.23457e-34
Rpl36a	2.97177e-12	-0.836591	0.414	0.847	6.04607e-08	2.22678e-19	-0.777247	0.482	0.789	4.53038e-15	1.1703e-23	-1.05877	0.506	0.861	2.38097e-19	9.01355e-33	-0.965732	0.376	0.813	1.83381e-28	5.48596e-25	-0.697741	0.532	0.802	1.11612e-20	3.24957e-25	-0.880175	0.6	0.848	6.61125e-21	2.75332e-21	-0.849278	0.495	0.827	5.60162e-17	4.59936e-32	-0.742819	0.488	0.793	9.35739e-28	2.97177e-12	7.21084e-32
Rpl23	2.24924e-15	-0.86583	0.586	0.909	4.57608e-11	3.62524e-25	-0.831189	0.737	0.891	7.37554e-21	7.54748e-24	-0.867702	0.79	0.947	1.53553e-19	3.24341e-30	-0.760534	0.685	0.886	6.59871e-26	1.21709e-31	-0.681242	0.751	0.886	2.47618e-27	1.22485e-30	-0.884688	0.791	0.915	2.49196e-26	5.71655e-30	-0.902036	0.8	0.916	1.16303e-25	6.66257e-32	-0.677207	0.671	0.855	1.3555e-27	2.24924e-15	5.33005e-31
Rpl19	4.67472e-19	-1.0922	0.552	0.893	9.51072e-15	2.13009e-29	-1.01736	0.693	0.905	4.33367e-25	3.38081e-27	-1.06353	0.728	0.938	6.87826e-23	9.26054e-39	-1.02274	0.644	0.885	1.88406e-34	1.61154e-44	-1.01707	0.699	0.891	3.27869e-40	4.69572e-30	-0.890227	0.8	0.923	9.55344e-26	5.47762e-34	-1.11015	0.714	0.912	1.11442e-29	6.45548e-50	-0.946037	0.61	0.869	1.31337e-45	4.67472e-19	5.16438e-49
Rpl38	7.75331e-11	-0.631612	0.741	0.931	1.57741e-06	3.72455e-27	-0.854976	0.693	0.92	7.57759e-23	2.35181e-23	-0.791969	0.889	0.95	4.78476e-19	1.10319e-32	-0.772497	0.705	0.907	2.24443e-28	2.70954e-21	-0.474633	0.884	0.928	5.51255e-17	3.77071e-34	-0.907765	0.864	0.935	7.67152e-30	9.11498e-28	-0.830877	0.829	0.925	1.85444e-23	4.21137e-45	-0.812221	0.746	0.9	8.56804e-41	7.75331e-11	3.3691e-44
Rpl36	2.50773e-13	-0.802494	0.621	0.88	5.10199e-09	8.28971e-22	-0.834242	0.553	0.824	1.68654e-17	1.06368e-23	-0.976059	0.642	0.894	2.16406e-19	2.9874e-32	-0.94308	0.45	0.832	6.07787e-28	3.64029e-30	-0.751978	0.555	0.839	7.40617e-26	2.82676e-27	-0.91252	0.618	0.875	5.75105e-23	4.49223e-24	-0.869102	0.619	0.859	9.13944e-20	1.44885e-42	-0.839237	0.634	0.862	2.94768e-38	2.50773e-13	1.15908e-41
Cox7c	1.13497e-11	-0.739055	0.517	0.877	2.30909e-07	3.155e-14	-0.574998	0.596	0.822	6.41885e-10	1.38066e-23	-1.0052	0.531	0.885	2.80896e-19	6.53792e-32	-0.900614	0.463	0.824	1.33014e-27	1.85777e-26	-0.670458	0.63	0.844	3.77962e-22	3.42165e-28	-0.919858	0.582	0.862	6.96135e-24	4.57489e-27	-0.931518	0.581	0.852	9.30762e-23	6.13857e-39	-0.800969	0.526	0.833	1.24889e-34	1.13497e-11	4.91085e-38
Tpt1	3.25124e-10	-0.650893	0.259	0.744	6.61464e-06	7.12002e-19	-0.842869	0.289	0.738	1.44857e-14	7.90689e-14	-0.747882	0.432	0.815	1.60866e-09	2.08705e-22	-0.76874	0.248	0.734	4.2461e-18	1.17026e-20	-0.668568	0.306	0.711	2.3809e-16	7.1481e-24	-0.923709	0.355	0.799	1.45428e-19	4.81941e-10	-0.452185	0.448	0.774	9.8051e-06	2.3994e-33	-0.830663	0.202	0.682	4.88158e-29	4.81941e-10	1.91952e-32
Rpl21	1.72631e-17	-0.918802	0.759	0.919	3.51217e-13	8.30136e-27	-0.92267	0.825	0.932	1.68891e-22	2.74716e-28	-1.05689	0.901	0.959	5.5891e-24	5.0134e-46	-1.18327	0.732	0.917	1.01998e-41	2.7144e-45	-1.01261	0.769	0.917	5.52244e-41	9.90438e-33	-0.924454	0.891	0.947	2.01505e-28	8.07924e-38	-1.25361	0.829	0.934	1.64372e-33	8.72797e-50	-0.941799	0.709	0.885	1.77571e-45	1.72631e-17	6.98238e-49
Gabarapl1	6.33561e-15	-0.990471	0.397	0.831	1.28898e-10	7.24418e-18	-0.795734	0.439	0.751	1.47383e-13	3.16565e-17	-0.782554	0.543	0.843	6.44051e-13	2.27136e-23	-0.752717	0.376	0.79	4.62109e-19	4.96397e-28	-0.785577	0.48	0.782	1.00992e-23	1.46985e-27	-0.953432	0.536	0.827	2.9904e-23	2.13655e-21	-0.834924	0.495	0.808	4.34681e-17	3.58834e-46	-1.02256	0.371	0.768	7.30047e-42	6.33561e-15	2.87067e-45
Nap1l5	1.13516e-19	-1.0185	0.828	0.942	2.30948e-15	1.19556e-21	-0.803148	0.833	0.92	2.43237e-17	6.9649e-25	-1.01497	0.889	0.949	1.41701e-20	2.00727e-39	-0.914283	0.758	0.93	4.0838e-35	1.97308e-40	-0.894803	0.786	0.927	4.01423e-36	1.02681e-35	-0.973186	0.818	0.94	2.08904e-31	4.30894e-28	-0.888591	0.895	0.944	8.76653e-24	1.82391e-54	-0.90537	0.873	0.94	3.71073e-50	1.13516e-19	1.45912e-53
Rps5	2.10152e-19	-1.16875	0.483	0.896	4.27554e-15	1.29077e-26	-0.94169	0.623	0.881	2.62608e-22	3.988e-23	-0.882922	0.79	0.931	8.11359e-19	2.34857e-40	-1.05571	0.631	0.877	4.77817e-36	3.34928e-42	-0.939491	0.659	0.884	6.81412e-38	9.47014e-33	-0.987833	0.764	0.918	1.9267e-28	1.62322e-30	-1.01333	0.686	0.906	3.30245e-26	1.03949e-38	-0.874141	0.563	0.834	2.11485e-34	2.10152e-19	2.67943e-41
Rps11	1.79775e-20	-1.18191	0.466	0.903	3.65752e-16	4.72249e-24	-0.900358	0.667	0.879	9.6079e-20	2.40123e-23	-0.901261	0.864	0.922	4.88531e-19	7.91157e-36	-0.98374	0.584	0.868	1.60961e-31	3.78952e-38	-0.871555	0.711	0.885	7.70978e-34	4.52856e-34	-0.996529	0.818	0.916	9.21335e-30	7.1801e-36	-1.20995	0.657	0.905	1.46079e-31	8.59395e-45	-0.934321	0.573	0.845	1.74844e-40	1.79775e-20	6.87516e-44
Rpl11	8.73792e-18	-1.01801	0.586	0.902	1.77773e-13	9.91452e-24	-0.911404	0.649	0.873	2.01711e-19	6.84645e-26	-1.0541	0.753	0.927	1.39291e-21	2.5935e-43	-1.15643	0.604	0.876	5.27648e-39	4.15442e-35	-0.824133	0.751	0.888	8.45216e-31	3.11342e-33	-1.00181	0.8	0.918	6.33426e-29	8.53394e-35	-1.14694	0.657	0.916	1.73623e-30	6.74411e-47	-0.98163	0.587	0.855	1.37209e-42	8.73792e-18	5.39529e-46
Rpl41	2.48418e-24	-0.926757	0.966	0.991	5.05407e-20	3.67075e-34	-0.956893	0.947	0.981	7.46814e-30	7.37645e-30	-0.942436	0.975	0.988	1.50074e-25	1.00689e-45	-0.898844	0.906	0.973	2.04852e-41	3.44058e-49	-0.78852	0.988	0.982	6.99986e-45	1.03693e-41	-1.00596	0.973	0.982	2.10964e-37	1.14849e-39	-1.02153	0.981	0.982	2.3366e-35	6.76696e-65	-0.978442	0.953	0.982	1.37674e-60	2.48418e-24	5.41357e-64
Naca	1.96145e-16	-1.17184	0.224	0.789	3.99056e-12	3.06274e-22	-0.986982	0.289	0.726	6.23114e-18	7.9373e-20	-1.00521	0.37	0.81	1.61484e-15	3.17954e-28	-0.940396	0.309	0.753	6.46878e-24	1.27473e-26	-0.835729	0.347	0.73	2.59344e-22	1.46136e-27	-1.00706	0.409	0.813	2.97314e-23	4.97201e-25	-1.04981	0.324	0.778	1.01156e-20	2.06341e-34	-0.865325	0.254	0.723	4.198e-30	1.96145e-16	1.65072e-33
Rpl39	6.80106e-10	-0.6425	0.655	0.894	1.38368e-05	5.35791e-19	-0.662899	0.693	0.88	1.09007e-14	3.02205e-17	-0.659214	0.827	0.927	6.14837e-13	3.61598e-23	-0.610664	0.638	0.873	7.35672e-19	3.52484e-18	-0.490122	0.665	0.88	7.17129e-14	5.6252e-31	-1.01858	0.573	0.871	1.14445e-26	1.09622e-21	-0.730887	0.714	0.887	2.23026e-17	5.94018e-27	-0.663225	0.521	0.82	1.20853e-22	6.80106e-10	4.50016e-30
Rps20	6.49809e-19	-1.31682	0.172	0.818	1.32204e-14	1.46849e-20	-0.849244	0.43	0.798	2.98764e-16	7.90573e-23	-1.05575	0.469	0.864	1.60842e-18	3.45106e-32	-0.95207	0.403	0.809	7.02118e-28	1.06644e-32	-0.871415	0.474	0.798	2.16967e-28	2.11344e-29	-1.02012	0.509	0.843	4.2998e-25	2.0627e-30	-1.14427	0.457	0.837	4.19656e-26	1.40629e-34	-0.849675	0.333	0.748	2.8611e-30	6.49809e-19	1.12503e-33
Rps26	1.51963e-13	-0.883897	0.414	0.851	3.09169e-09	1.0937e-20	-0.814928	0.447	0.792	2.22513e-16	2.81942e-17	-0.78952	0.556	0.874	5.73612e-13	1.67993e-23	-0.686615	0.45	0.826	3.41781e-19	6.3735e-24	-0.664719	0.503	0.805	1.29669e-19	2.79836e-31	-1.02441	0.5	0.861	5.69325e-27	7.0633e-25	-0.939767	0.41	0.835	1.43703e-20	2.10046e-35	-0.814529	0.451	0.79	4.27339e-31	1.51963e-13	1.68037e-34
Rps17	3.66714e-16	-1.05325	0.379	0.85	7.4608e-12	3.14124e-25	-0.951881	0.474	0.828	6.39085e-21	4.18363e-26	-1.11006	0.457	0.885	8.5116e-22	1.23695e-31	-0.872796	0.483	0.836	2.51657e-27	1.01193e-27	-0.721939	0.566	0.828	2.05878e-23	4.02418e-31	-1.03292	0.527	0.866	8.1872e-27	8.9023e-24	-0.862506	0.552	0.851	1.81117e-19	2.09667e-30	-0.739507	0.437	0.783	4.26567e-26	3.66714e-16	9.89557e-31
Rps21	1.15986e-17	-0.949379	0.621	0.901	2.35973e-13	1.32502e-26	-0.985078	0.64	0.866	2.69576e-22	1.64892e-26	-1.09144	0.728	0.914	3.35474e-22	1.00883e-46	-1.27215	0.463	0.87	2.05246e-42	4.07946e-33	-0.799088	0.671	0.874	8.29966e-29	4.60267e-33	-1.03366	0.7	0.899	9.36413e-29	5.13273e-27	-0.898035	0.79	0.888	1.04425e-22	5.88184e-45	-0.903528	0.601	0.861	1.19666e-40	1.15986e-17	8.07062e-46
Rpl17	1.38462e-18	-0.976138	0.724	0.929	2.81701e-14	1.27453e-30	-0.965467	0.842	0.943	2.59303e-26	1.36722e-29	-1.07359	0.889	0.964	2.78161e-25	2.2025e-42	-0.991484	0.805	0.929	4.48098e-38	3.21901e-42	-0.870513	0.827	0.934	6.54908e-38	2.22817e-36	-1.03668	0.873	0.952	4.53321e-32	2.467e-34	-1.05273	0.838	0.947	5.01912e-30	1.40655e-60	-1.19723	0.638	0.879	2.86163e-56	1.38462e-18	1.12524e-59
Rpl35	8.59365e-13	-0.841019	0.362	0.839	1.74838e-08	8.46676e-23	-0.966633	0.342	0.765	1.72256e-18	1.38948e-24	-1.17119	0.395	0.844	2.82689e-20	5.15288e-24	-0.803598	0.409	0.792	1.04835e-19	8.61436e-32	-0.859603	0.41	0.778	1.75259e-27	7.67413e-30	-1.03889	0.473	0.848	1.5613e-25	8.3293e-29	-1.15696	0.352	0.801	1.6946e-24	2.70578e-48	-1.08141	0.441	0.811	5.50492e-44	8.59365e-13	2.16463e-47
Rps8	3.22853e-22	-1.14695	0.724	0.938	6.56844e-18	2.56091e-31	-1.06641	0.895	0.956	5.21017e-27	2.07969e-29	-1.10087	0.951	0.971	4.23113e-25	7.92431e-47	-1.14866	0.805	0.948	1.6122e-42	2.62359e-47	-0.994507	0.861	0.939	5.33769e-43	4.33067e-36	-1.04221	0.891	0.956	8.81074e-32	3.28305e-39	-1.22101	0.895	0.957	6.67936e-35	6.08953e-62	-1.24809	0.62	0.887	1.23891e-57	3.22853e-22	4.87162e-61
Ywhaz	6.92387e-19	-1.31763	0.19	0.811	1.40866e-14	7.5989e-23	-1.11686	0.175	0.662	1.546e-18	1.32337e-20	-1.05181	0.284	0.777	2.6924e-16	1.07112e-29	-0.987829	0.221	0.728	2.17919e-25	1.36458e-30	-0.95383	0.243	0.702	2.77623e-26	9.45656e-26	-1.04481	0.264	0.763	1.92394e-21	1.387e-21	-0.924924	0.362	0.755	2.82185e-17	5.04547e-36	-0.860655	0.338	0.739	1.0265e-31	6.92387e-19	4.03637e-35
Rps3	2.46772e-20	-1.36569	0.362	0.867	5.02057e-16	2.33521e-28	-1.1596	0.553	0.839	4.75098e-24	4.12778e-28	-1.23956	0.63	0.904	8.39796e-24	2.26016e-40	-1.25075	0.409	0.827	4.59829e-36	8.2336e-43	-1.12273	0.595	0.835	1.67513e-38	1.77361e-32	-1.06549	0.718	0.888	3.60842e-28	2.99035e-33	-1.24557	0.619	0.873	6.08388e-29	1.74516e-51	-1.1844	0.423	0.807	3.55054e-47	2.46772e-20	1.39613e-50
Rps9	2.5708e-18	-1.26768	0.31	0.839	5.2303e-14	8.73005e-23	-0.995825	0.421	0.777	1.77613e-18	1.30514e-20	-1.00703	0.519	0.845	2.65531e-16	7.65009e-39	-1.22627	0.336	0.787	1.55641e-34	9.33973e-34	-0.964855	0.428	0.783	1.90017e-29	4.63904e-30	-1.07254	0.518	0.851	9.43813e-26	1.77418e-31	-1.23069	0.438	0.82	3.60957e-27	5.66494e-45	-1.07307	0.319	0.773	1.15253e-40	2.5708e-18	4.53195e-44
[truncated: 31 more rows]

## Sheet: Vgat4
	P23F_p_val	P23F_avg_logFC	P23F_pct.1	P23F_pct.2	P23F_p_val_adj	AF_p_val	AF_avg_logFC	AF_pct.1	AF_pct.2	AF_p_val_adj	P35F_p_val	P35F_avg_logFC	P35F_pct.1	P35F_pct.2	P35F_p_val_adj	Cast_p_val	Cast_avg_logFC	Cast_pct.1	Cast_pct.2	Cast_p_val_adj	OVX_p_val	OVX_avg_logFC	OVX_pct.1	OVX_pct.2	OVX_p_val_adj	AM_p_val	AM_avg_logFC	AM_pct.1	AM_pct.2	AM_p_val_adj	P35M_p_val	P35M_avg_logFC	P35M_pct.1	P35M_pct.2	P35M_p_val_adj	P23M_p_val	P23M_avg_logFC	P23M_pct.1	P23M_pct.2	P23M_p_val_adj	max_pval	minimump_p_val
[truncated: 171 more rows]

[truncated: 31 more sheets: Vgat5, Vgat6, Vgat7, Vgat8, Vgat9, Vgat10, Vgat11, Vgat12, Vgat13, Vgat14, Vgat15, Vgat16, Vgat17, Vgat18, Vgat19, Vgat20, Vglu1, Vglu2, Vglu3, Vglu4 …]
