# Supplementary material for: Esr1-dependent signaling and transcriptional maturation in the medial preoptic area of the hypothalamus shape the development of mating behavior during adolescence
Source: eLife. 2026 Jun 19;14:RP106347. doi: 10.7554/eLife.106347 (PMC13282117; doi:10.7554/eLife.106347)
Supplement: Supplementary file 3. [file elife-106347-supp3.xlsx]

## Sheet: Vgat_Female_P23FvsP35F
	p_val	avg_logFC	pct.1	pct.2	p_val_adjust
Zmym1	1.22125e-56	0.639328	0.67	0.473	2.18885e-52
Gm47283	2.99708e-53	0.607228	0.58	0.363	5.36927e-49
Tmsb10	9.4239e-86	0.430637	0.97	0.949	1.69027e-81
AC149090.1	1.62205e-32	0.413516	0.759	0.699	2.90104e-28
Bc1	2.39117e-32	0.411085	0.518	0.376	4.27614e-28
Ndn	3.77005e-34	0.398456	0.726	0.539	6.74425e-30
mt-Atp8	1.04374e-34	0.376603	0.647	0.522	1.86747e-30
AC160336.1	5.45239e-18	0.376541	0.592	0.515	9.7227e-14
C1ql3	2.80765e-06	0.373801	0.24	0.184	0.0488531
Atxn7l3b	1.64978e-35	0.322445	0.809	0.767	2.95229e-31
Cnot3	2.19997e-21	0.313834	0.405	0.282	3.92716e-17
Snrpn	1.91356e-44	0.309938	0.909	0.893	3.4268e-40
Mt3	1.49172e-26	0.309933	0.824	0.82	2.66584e-22
Marcksl1	8.4567e-18	0.291469	0.748	0.724	1.50791e-13
Ubb	1.88052e-28	0.280497	0.889	0.866	3.36161e-24
Pcsk2	3.6871e-07	0.27735	0.467	0.413	0.00646791
Polr2l	1.14152e-12	0.275734	0.413	0.332	2.02985e-08
Calr	1.3766e-19	0.271911	0.766	0.728	2.456e-15
Morf4l2	2.69778e-20	0.27011	0.778	0.748	4.81473e-16
Uqcr10	9.09412e-24	0.266829	0.827	0.801	1.62466e-19
Eif3j1	9.47277e-13	0.265114	0.396	0.319	1.68473e-08
Hmgn2	6.78811e-10	0.264223	0.571	0.542	1.20231e-05
Pea15a	1.02042e-14	0.262397	0.783	0.755	1.81707e-10
Ftl1	6.11395e-20	0.262222	0.89	0.872	1.09091e-15
Cox17	8.21078e-20	0.253085	0.8	0.784	1.46497e-15
Rtl8a	6.00122e-22	0.25228	0.939	0.935	1.07152e-17
Sox2	1.08082e-06	0.250437	0.35	0.304	0.0188927
Hmgb1	1.30726e-11	0.244272	0.642	0.632	2.32157e-07
Tatdn1	9.16618e-10	0.242621	0.445	0.389	1.62306e-05
Celf4	2.72659e-35	0.239314	0.953	0.947	4.87895e-31
Serf1	1.12295e-08	0.238128	0.41	0.356	0.000198325
Caprin1	3.41952e-13	0.237292	0.656	0.626	6.08401e-09
Ndufc1	3.13291e-11	0.235958	0.68	0.66	5.56247e-07
Btg1	1.30825e-06	0.235254	0.424	0.373	0.0228552
Marcks	6.43079e-13	0.232216	0.824	0.795	1.14384e-08
Xist	1.88668e-13	0.224993	0.982	0.986	3.35791e-09
Camk2n1	5.62464e-08	0.221481	0.606	0.593	0.000990612
Sarnp	6.30776e-09	0.220843	0.471	0.426	0.000111471
Usmg5	2.99535e-17	0.220654	0.796	0.8	5.34011e-13
Sncb	4.16089e-07	0.216157	0.639	0.649	0.00729695
Atp5k	4.20439e-13	0.215967	0.767	0.751	7.47919e-09
Ptms	1.36612e-09	0.210168	0.751	0.726	2.41803e-05
Basp1	1.02573e-17	0.209044	0.851	0.84	1.82888e-13
Syn2	2.19615e-10	0.208325	0.733	0.725	3.89421e-06
Selenow	2.02055e-24	0.20832	0.931	0.929	3.61012e-20
Cnih2	5.55437e-11	0.208142	0.704	0.675	9.85956e-07
Hypk	3.37301e-08	0.207539	0.512	0.473	0.000594831
Elob	2.79712e-10	0.20512	0.685	0.668	4.95901e-06
Epb41l3	5.12056e-07	0.199672	0.58	0.561	0.00897326
Zc3h15	2.82006e-08	0.19912	0.563	0.531	0.000497458
Cox6a1	3.79005e-13	0.198863	0.784	0.783	6.74288e-09
Hmgn3	3.05153e-08	0.198048	0.65	0.625	0.000538228
Ptma	1.99369e-10	0.197877	0.841	0.828	3.53601e-06
Lrrc17	2.02367e-19	0.196829	0.175	0.073	3.61022e-15
Rtl8b	4.88295e-09	0.195049	0.661	0.665	8.63207e-05
Cdh2	5.50865e-07	0.193579	0.601	0.573	0.00965171
Mtpn	1.97475e-09	0.192973	0.712	0.698	3.49374e-05
St13	3.40098e-09	0.190085	0.68	0.642	6.01429e-05
Eif4g2	5.46867e-15	0.188755	0.852	0.833	9.74188e-11
Hras	1.85092e-07	0.186243	0.582	0.551	0.00325317
Uqcr11	3.54961e-08	0.185576	0.674	0.672	0.000625938
Cltc	5.62721e-11	0.18549	0.803	0.817	9.98829e-07
Romo1	3.94747e-08	0.185354	0.593	0.568	0.00069582
Rpl41	4.68662e-30	0.185144	0.995	0.996	8.3792e-26
Malat1	2.30195e-09	0.184941	1	0.999	4.07215e-05
Oaz1	4.30148e-21	0.183342	0.944	0.931	7.67814e-17
Hnrnpc	2.67484e-06	0.181371	0.559	0.549	0.0465663
Ndufa2	4.93253e-12	0.181146	0.824	0.812	8.7651e-08
Snap91	4.03055e-07	0.180217	0.699	0.701	0.00706958
Ywhab	6.31296e-15	0.179994	0.88	0.872	1.12453e-10
Ppp2r2c	4.64011e-07	0.179727	0.612	0.605	0.00813364
Ywhaz	1.39835e-15	0.177836	0.854	0.845	2.49172e-11
Mllt11	1.03008e-11	0.177541	0.825	0.836	1.82962e-07
Ndufa3	9.04335e-09	0.176708	0.702	0.712	0.00015976
Ppp1cb	2.06033e-10	0.17649	0.704	0.69	3.654e-06
Cops9	3.31563e-13	0.17486	0.843	0.831	5.89951e-09
Atp5g1	7.28767e-07	0.174287	0.685	0.684	0.0127563
Elavl3	3.24892e-10	0.174187	0.78	0.767	5.75871e-06
Pura	4.75866e-12	0.173474	0.803	0.794	8.45661e-08
Rps28	4.58092e-15	0.173443	0.947	0.939	8.16091e-11
Sumo1	1.20379e-06	0.173145	0.712	0.701	0.0210338
Atp1a3	3.37704e-09	0.172653	0.775	0.793	5.97229e-05
Dnaja1	2.14359e-08	0.172509	0.698	0.696	0.000378216
Calm3	1.97029e-11	0.171884	0.845	0.855	3.49844e-07
Morf4l1	2.01683e-16	0.17048	0.891	0.895	3.5946e-12
Chd3os	7.63499e-12	0.168869	0.892	0.902	1.35636e-07
Ap2a2	1.60193e-06	0.168846	0.637	0.644	0.0279536
Cbx6	3.38248e-07	0.168215	0.688	0.723	0.00593557
Pfn2	1.8717e-08	0.16683	0.767	0.775	0.000330298
Ppp2ca	3.25534e-07	0.165353	0.675	0.683	0.0057128
Tma7	3.71958e-12	0.164687	0.886	0.889	6.61156e-08
Ywhag	2.83089e-14	0.162515	0.901	0.902	5.04041e-10
Cfl1	1.54163e-09	0.159877	0.851	0.851	2.72837e-05
Ypel3	6.82385e-07	0.159726	0.702	0.712	0.0119458
Calm2	8.96223e-19	0.158709	0.934	0.93	1.59859e-14
Fkbp1a	2.30853e-08	0.158708	0.792	0.798	0.000407272
Ywhae	5.34019e-12	0.154156	0.865	0.858	9.48845e-08
Ywhah	1.37187e-10	0.143518	0.876	0.876	2.43343e-06
Mapt	4.18925e-10	0.138928	0.849	0.864	7.42334e-06
Pja2	5.45393e-08	0.136715	0.815	0.823	0.0009606
Mrfap1	1.18844e-09	0.133484	0.865	0.884	2.1039e-05
Son	9.21652e-08	0.132937	0.854	0.878	0.00162183
Ahi1	3.50098e-11	0.132418	0.943	0.951	6.21529e-07
Nap1l5	4.06275e-12	0.127686	0.971	0.974	7.22113e-08
Dynll2	6.90795e-10	0.126476	0.881	0.905	1.22347e-05
Canx	2.98326e-07	0.124225	0.894	0.913	0.00523621
Pafah1b1	2.02426e-06	0.122096	0.794	0.797	0.0352829
Calm1	3.55484e-08	0.110027	0.895	0.908	0.000626825
Peg3	7.44308e-07	0.100268	0.914	0.937	0.0130276
Sec62	2.31586e-06	0.0989478	0.931	0.936	0.0403493
Ttc3	4.12423e-09	0.0780511	0.981	0.987	7.29287e-05
Snhg11	2.66477e-06	0.0576914	1	0.998	0.0463937

## Sheet: Vgat_Female_P23FvsP50F
	p_val	avg_logFC	pct.1	pct.2	p_val_adjust
Zmym1	1.82256e-60	0.653072	0.67	0.391	3.221e-56
Tmsb10	5.48133e-131	0.636087	0.97	0.875	9.69044e-127
Ndn	2.30066e-59	0.584702	0.726	0.435	4.06526e-55
Nnat	4.53872e-16	0.578612	0.71	0.609	7.96455e-12
C1ql3	5.33716e-16	0.508201	0.24	0.124	9.36512e-12
Pgr15l	2.07523e-15	0.47458	0.297	0.176	3.63995e-11
Selenow	2.66587e-77	0.453107	0.931	0.843	4.71192e-73
Atxn7l3b	1.05888e-51	0.444111	0.809	0.688	1.87083e-47
mt-Atp8	2.99876e-38	0.42007	0.647	0.455	5.29552e-34
Syn2	4.03606e-33	0.411259	0.733	0.614	7.12446e-29
Bc1	1.58042e-30	0.407321	0.518	0.344	2.78913e-26
Basp1	2.18853e-46	0.406349	0.851	0.703	3.8656e-42
Mt3	1.68264e-37	0.401929	0.824	0.74	2.97104e-33
Marcks	2.71593e-33	0.400322	0.824	0.679	4.79443e-29
Marcksl1	3.88599e-30	0.394534	0.748	0.61	6.85723e-26
Ubb	3.15597e-45	0.388264	0.889	0.783	5.57407e-41
Ptms	2.80164e-31	0.386836	0.751	0.628	4.94462e-27
Ftl1	2.49331e-34	0.37423	0.89	0.792	4.40219e-30
Hmgn2	4.88408e-20	0.373291	0.571	0.458	8.59354e-16
A330069E16Rik	1.55215e-09	0.370094	0.223	0.141	2.69656e-05
Nap1l5	1.73664e-60	0.366843	0.971	0.946	3.06934e-56
Cbx6	1.32426e-28	0.366593	0.688	0.591	2.33627e-24
Snrpn	5.0759e-48	0.364398	0.909	0.808	8.96658e-44
Ywhab	9.83972e-42	0.363999	0.88	0.761	1.73769e-37
Ywhag	3.50531e-47	0.361795	0.901	0.801	6.19178e-43
Camk2n1	3.94606e-21	0.358861	0.606	0.486	6.94941e-17
Cltc	1.32935e-31	0.350336	0.803	0.7	2.34643e-27
Tubb3	3.64061e-22	0.34911	0.557	0.443	6.4133e-18
Nrgn	2.93263e-07	0.347727	0.223	0.156	0.00503503
Morf4l2	9.45616e-30	0.342925	0.778	0.656	1.66835e-25
Calm3	2.53097e-33	0.339071	0.845	0.745	4.46817e-29
Celf4	1.99945e-51	0.338402	0.953	0.87	3.53242e-47
Rps28	2.7945e-43	0.335656	0.947	0.886	4.93537e-39
Polr2l	2.31018e-21	0.33525	0.413	0.265	4.06869e-17
Rtl8b	7.5683e-24	0.334459	0.661	0.566	1.33376e-19
Ccnb1ip1	6.64319e-07	0.333805	0.307	0.24	0.0113758
Rgs4	4.40032e-10	0.329074	0.435	0.346	7.65744e-06
Uqcr10	1.71619e-30	0.328206	0.827	0.72	3.02856e-26
Ywhaz	5.12896e-34	0.327349	0.854	0.708	9.05518e-30
Ppp3r1	4.93483e-24	0.317954	0.746	0.653	8.69813e-20
Eid1	1.53228e-22	0.314132	0.749	0.63	2.69988e-18
Lypd1	3.1886e-08	0.312542	0.329	0.242	0.00055099
Cnih2	8.96938e-21	0.30628	0.704	0.61	1.57924e-16
Rpl41	1.49911e-55	0.305875	0.995	0.985	2.64877e-51
B630019K06Rik	7.65328e-18	0.30497	0.623	0.505	1.34522e-13
Atp6v1a	4.44461e-25	0.30419	0.799	0.696	7.83629e-21
Clip3	2.66159e-22	0.30144	0.719	0.609	4.68893e-18
Mtpn	8.94046e-20	0.300591	0.712	0.604	1.57281e-15
Elovl4	3.38947e-14	0.299528	0.402	0.28	5.93767e-10
Peg10	2.19267e-11	0.299193	0.295	0.202	3.82752e-07
Tubb4a	2.76976e-19	0.298994	0.653	0.552	4.87174e-15
Gng2	2.29218e-18	0.297931	0.74	0.645	4.02988e-14
Dcaf7	1.17411e-18	0.296529	0.634	0.529	2.06467e-14
Vamp2	6.45676e-26	0.294251	0.835	0.722	1.13858e-21
Ppp2r2c	9.03707e-18	0.292828	0.612	0.507	1.58836e-13
Syn1	2.89595e-16	0.292536	0.554	0.464	5.08297e-12
Mllt11	1.03841e-24	0.29225	0.825	0.736	1.83052e-20
Gpr101	4.79871e-07	0.287968	0.299	0.222	0.00822643
Ap2m1	1.52264e-20	0.287709	0.674	0.584	2.68015e-16
Cops9	2.86743e-27	0.285513	0.843	0.754	5.05729e-23
Pak1	3.08221e-18	0.284099	0.633	0.52	5.41853e-14
Map1lc3b	3.04389e-17	0.282998	0.477	0.363	5.34721e-13
Ywhaq	4.63239e-21	0.282437	0.756	0.667	8.15718e-17
Cited2	6.90589e-10	0.280514	0.348	0.261	1.20121e-05
Vat1l	9.08061e-15	0.280185	0.634	0.541	1.59219e-10
Cdh13	1.09557e-08	0.27973	0.405	0.319	0.000189709
Mapk1	5.32164e-17	0.277292	0.703	0.618	9.34587e-13
Nsf	1.78079e-20	0.27638	0.789	0.705	3.13436e-16
Usmg5	2.3948e-22	0.275819	0.796	0.705	4.21916e-18
Dynll2	9.41302e-30	0.273941	0.881	0.8	1.66083e-25
Cfl1	4.45005e-24	0.272246	0.851	0.761	7.8441e-20
Ywhah	6.39979e-26	0.270684	0.876	0.768	1.1286e-21
Dlk1	1.56337e-10	0.270123	0.434	0.309	2.72401e-06
Sncb	6.30074e-13	0.269818	0.639	0.572	1.10263e-08
Atp5k	3.78611e-20	0.269503	0.767	0.685	6.66241e-16
Serp2	7.85582e-22	0.266006	0.795	0.708	1.38365e-17
Atp6v1b2	1.16952e-16	0.265496	0.736	0.665	2.05321e-12
Eef1a2	1.24468e-13	0.262934	0.482	0.388	2.17955e-09
Rab7	2.28806e-17	0.261053	0.604	0.494	4.02013e-13
Cox17	2.87191e-19	0.260936	0.8	0.706	5.05111e-15
Cnot3	5.10496e-15	0.260129	0.405	0.292	8.95206e-11
Vapa	1.8093e-14	0.258903	0.504	0.405	3.17152e-10
Smarca2	3.73841e-16	0.257118	0.688	0.598	6.56053e-12
Serf1	2.01739e-10	0.256168	0.41	0.329	3.51429e-06
Ahi1	6.80078e-28	0.255318	0.943	0.894	1.19959e-23
Syp	1.87539e-20	0.254475	0.867	0.831	3.30069e-16
Tpi1	3.35873e-13	0.252602	0.615	0.543	5.87979e-09
Eif3j1	3.77854e-12	0.25255	0.396	0.305	6.60338e-08
Ywhae	7.12269e-24	0.252524	0.865	0.762	1.2553e-19
Peg3	1.80155e-26	0.252387	0.914	0.856	3.17721e-22
Ndufaf8	1.62466e-11	0.251216	0.503	0.419	2.83682e-07
Pea15a	1.76879e-17	0.251149	0.783	0.688	3.10794e-13
Pafah1b2	1.21523e-13	0.251071	0.648	0.566	2.1281e-09
Uba52	2.12116e-11	0.250212	0.416	0.332	3.70291e-07
Prkaca	2.33508e-14	0.249656	0.659	0.579	4.09223e-10
Pura	6.4369e-19	0.248335	0.803	0.708	1.13199e-14
Alg2	1.38985e-17	0.248063	0.75	0.675	2.44252e-13
Calm1	7.50754e-26	0.248057	0.895	0.794	1.3238e-21
Cbarp	4.99775e-25	0.247558	0.921	0.881	8.81104e-21
Pja2	1.51206e-18	0.245676	0.815	0.719	2.6585e-14
Rnf220	3.23021e-12	0.245357	0.549	0.473	5.64544e-08
Ube2m	8.13061e-12	0.244171	0.394	0.301	1.42042e-07
Slc2a3	2.34832e-12	0.244022	0.448	0.345	4.10487e-08
Fkbp1a	2.81533e-17	0.244	0.792	0.71	4.94596e-13
Tmem256	2.99305e-11	0.243984	0.517	0.432	5.22288e-07
Chd3os	5.82608e-20	0.243744	0.892	0.826	1.02498e-15
2900011O08Rik	1.12664e-12	0.243273	0.566	0.481	1.97038e-08
Tma7	1.51929e-20	0.242014	0.886	0.805	2.67441e-16
Prkar1b	1.35003e-19	0.241083	0.803	0.705	2.37483e-15
Ppp1cb	1.07973e-16	0.239018	0.704	0.617	1.89568e-12
Ppp2ca	2.43779e-14	0.238772	0.675	0.594	4.27199e-10
Rgs2	8.70997e-08	0.238085	0.282	0.21	0.00150047
1500011B03Rik	6.70371e-13	0.238055	0.747	0.673	1.17301e-08
Atp6v1g2	1.25727e-10	0.236899	0.661	0.604	2.19141e-06
Elob	3.08474e-13	0.236338	0.685	0.611	5.40045e-09
Gnao1	1.6293e-17	0.235659	0.824	0.73	2.863e-13
Gmfb	4.38713e-10	0.23556	0.462	0.391	7.63492e-06
Caprin1	3.48136e-13	0.235441	0.656	0.581	6.09411e-09
Gnaz	1.34015e-11	0.235324	0.6	0.53	2.3403e-07
Cdk5r1	3.58667e-13	0.234922	0.695	0.637	6.2781e-09
Aldoa	2.80331e-16	0.234258	0.718	0.629	4.92065e-12
Vdac1	4.33839e-12	0.234141	0.623	0.572	7.58133e-08
Ndufa2	1.40062e-15	0.232254	0.824	0.744	2.45738e-11
AI413582	8.45293e-10	0.231844	0.488	0.428	1.46988e-05
Dnajc5	3.2239e-17	0.231733	0.818	0.76	5.66311e-13
Calm2	1.85609e-28	0.230848	0.934	0.876	3.27432e-24
Tppp	1.9486e-09	0.229444	0.554	0.502	3.38395e-05
Stx1b	2.01512e-11	0.228796	0.575	0.497	3.5182e-07
Bola2	1.15656e-11	0.22873	0.569	0.504	2.02005e-07
Gapdh	2.09066e-11	0.228683	0.568	0.487	3.64988e-07
Morf4l1	9.4119e-21	0.227845	0.891	0.808	1.65706e-16
Ubfd1	1.46848e-11	0.226208	0.448	0.358	2.56426e-07
Ap1s2	1.40551e-06	0.226185	0.41	0.346	0.0239948
Uqcr11	8.91054e-13	0.225356	0.674	0.613	1.55863e-08
Taok3	6.13878e-10	0.224531	0.605	0.527	1.06784e-05
Tubb2a	2.45582e-11	0.224067	0.507	0.423	4.28639e-07
Klc1	3.60637e-13	0.223786	0.681	0.609	6.31223e-09
Ankrd46	4.03041e-11	0.222915	0.437	0.356	7.02944e-07
Eif4g2	2.48221e-17	0.221738	0.852	0.74	4.36099e-13
Nudt11	3.07224e-08	0.221307	0.391	0.324	0.000530913
Gng3	4.1e-17	0.220946	0.845	0.75	7.20083e-13
Gnaq	9.6069e-13	0.220448	0.696	0.618	1.68034e-08
Ctnnb1	1.41031e-10	0.22013	0.59	0.506	2.45776e-06
Ptma	7.16796e-12	0.219876	0.841	0.762	1.25231e-07
Klhdc10	2.53798e-10	0.218188	0.536	0.456	4.41888e-06
Cend1	2.16734e-07	0.217856	0.517	0.477	0.00372435
Stmn1	5.33358e-11	0.217135	0.753	0.673	9.30123e-07
Ndrg4	2.76611e-11	0.216419	0.827	0.795	4.82714e-07
Jund	1.27002e-07	0.216215	0.414	0.351	0.00218571
Zdbf2	9.37613e-10	0.216147	0.53	0.46	1.63004e-05
Rcan2	8.13885e-09	0.214841	0.563	0.494	0.000140981
Ndufc1	1.95062e-10	0.214561	0.68	0.628	3.39817e-06
Enho	2.4688e-09	0.214039	0.356	0.271	4.28584e-05
Prkar1a	6.83329e-17	0.213972	0.845	0.744	1.19986e-12
Pcbp1	3.21475e-08	0.213559	0.478	0.417	0.000555477
Snap47	1.531e-10	0.213343	0.582	0.514	2.66793e-06
Map7d2	8.39639e-12	0.213257	0.671	0.586	1.46668e-07
Cx3cl1	1.83596e-12	0.213082	0.641	0.577	3.20963e-08
Tcf25	6.31503e-13	0.212978	0.763	0.699	1.10507e-08
Dnaja1	4.43445e-12	0.212346	0.698	0.624	7.74875e-08
Hras	4.32816e-10	0.21169	0.582	0.513	7.53273e-06
Stmn2	5.79389e-17	0.211686	0.89	0.858	1.01741e-12
Arhgdia	1.45665e-08	0.211383	0.545	0.487	0.000252059
mt-Nd4l	1.19172e-09	0.211373	0.732	0.688	2.0711e-05
Serf2	1.44588e-12	0.211168	0.842	0.758	2.52813e-08
Tsc22d1	2.34503e-10	0.211004	0.726	0.688	4.08386e-06
Ankra2	4.4864e-08	0.210254	0.447	0.383	0.000774621
Gabarapl1	1.47604e-17	0.210237	0.871	0.802	2.59384e-13
Eif4h	3.24327e-10	0.209441	0.585	0.517	5.64589e-06
Ppp2r1a	1.9026e-10	0.209331	0.533	0.457	3.31472e-06
Rplp0	5.41505e-08	0.208453	0.767	0.684	0.000934584
Rnf14	1.29802e-10	0.208287	0.638	0.563	2.26232e-06
Atp5g1	1.22911e-09	0.207031	0.685	0.634	2.13582e-05
Atp1a3	2.68667e-12	0.206915	0.775	0.749	4.69604e-08
Oxct1	6.62296e-08	0.206519	0.456	0.398	0.00114206
Nbdy	7.21151e-09	0.206079	0.582	0.52	0.000124947
Atp6v0d1	1.34974e-08	0.205878	0.502	0.424	0.000233586
Wbp11	2.39001e-10	0.20494	0.478	0.4	4.16196e-06
Pitpna	1.18534e-08	0.204925	0.498	0.442	0.000205194
Stxbp1	1.58443e-13	0.204699	0.816	0.736	2.77417e-09
Rab10	5.61121e-10	0.204289	0.596	0.523	9.76294e-06
Scoc	1.10644e-12	0.20407	0.761	0.697	1.93516e-08
Pnmal2	2.54124e-14	0.203989	0.879	0.749	4.45301e-10
Gm47283	1.13507e-09	0.203982	0.58	0.484	1.97276e-05
Rab21	7.1764e-08	0.203354	0.454	0.385	0.00123685
Pkm	8.95418e-11	0.202666	0.73	0.676	1.56116e-06
Rhob	1.11499e-08	0.202238	0.421	0.345	0.000193061
Nedd8	1.64692e-10	0.202096	0.694	0.624	2.86942e-06
Ttyh3	1.64788e-09	0.201889	0.413	0.328	2.86253e-05
Gm26917	1.39252e-09	0.201026	0.538	0.474	2.41937e-05
Pdap1	2.08207e-10	0.200943	0.627	0.549	3.62634e-06
Atp5a1	3.53172e-09	0.199699	0.67	0.606	6.1286e-05
Trib2	1.77495e-09	0.199606	0.244	0.161	3.0831e-05
Dpysl5	1.64438e-06	0.199605	0.317	0.256	0.0280581
Ppdpf	7.77044e-07	0.199592	0.442	0.392	0.0132968
Fam168b	1.30537e-08	0.199429	0.461	0.396	0.00022596
Snap91	1.29494e-09	0.199224	0.699	0.628	2.25009e-05
Csnk1d	7.73724e-08	0.198616	0.432	0.37	0.00133313
Pfn2	3.78869e-11	0.19857	0.767	0.696	6.60861e-07
Hmgb1	5.51615e-09	0.19847	0.642	0.587	9.56445e-05
Usp11	2.27642e-08	0.198285	0.545	0.485	0.000393684
Ube2s	7.50598e-08	0.197989	0.568	0.504	0.00129343
Mapt	1.48079e-15	0.197729	0.849	0.771	2.59775e-11
Msantd4	6.05029e-07	0.197442	0.384	0.321	0.0103641
Oaz1	1.43496e-18	0.196918	0.944	0.88	2.52309e-14
Capzb	2.02667e-06	0.196833	0.457	0.413	0.0345467
Agap3	4.65961e-09	0.195745	0.505	0.428	8.08162e-05
Ppme1	1.17433e-07	0.195668	0.516	0.457	0.00202138
Ina	1.01056e-08	0.195613	0.636	0.582	0.000174998
Ubqln2	3.66439e-09	0.1953	0.574	0.511	6.35845e-05
Rab6b	4.60426e-09	0.194958	0.663	0.609	7.98656e-05
Rps27	1.45116e-15	0.194897	0.968	0.96	2.54591e-11
Hspa4	2.33801e-08	0.194876	0.475	0.404	0.000404289
Ap2a2	1.32371e-10	0.194498	0.637	0.577	2.30696e-06
Mapre2	1.59102e-08	0.194082	0.553	0.493	0.000275294
Hp1bp3	1.18112e-10	0.192762	0.692	0.617	2.05904e-06
Necap1	6.00064e-09	0.191548	0.609	0.549	0.000104009
Tmsb4x	7.2726e-15	0.191169	0.966	0.943	1.27525e-10
Hnrnpc	4.48527e-08	0.190989	0.559	0.504	0.000774471
Zc3h15	2.51384e-09	0.189358	0.563	0.486	4.36352e-05
C1qtnf4	1.15352e-08	0.188674	0.475	0.404	0.000199697
Cox8a	3.10669e-18	0.188386	0.933	0.886	5.46126e-14
Hdac11	7.08304e-08	0.188026	0.655	0.623	0.00122105
Skp1a	5.68446e-09	0.187877	0.656	0.589	9.85515e-05
Cmas	9.02556e-08	0.187462	0.514	0.45	0.00155474
Epb41l3	5.46438e-08	0.187345	0.58	0.523	0.000942989
Ptpa	2.28292e-06	0.18689	0.459	0.419	0.0388872
Apbb1	3.93049e-08	0.186435	0.508	0.446	0.000678913
Wbp4	6.08796e-08	0.185967	0.55	0.487	0.00105011
Cdk5r2	6.58458e-07	0.185931	0.399	0.339	0.0112761
Tcea1	1.71626e-07	0.185574	0.37	0.301	0.00295093
Ubqln1	6.07369e-08	0.185333	0.51	0.455	0.00104777
Pnmal1	5.28418e-09	0.185182	0.633	0.572	9.16278e-05
Nucks1	2.05322e-07	0.184265	0.654	0.61	0.00352866
Tmem242	2.20175e-07	0.184068	0.418	0.353	0.00378326
Rab6a	1.33208e-12	0.183869	0.813	0.74	2.32927e-08
Diras1	7.68596e-08	0.18344	0.266	0.192	0.00132437
Prkacb	6.83859e-14	0.183438	0.884	0.799	1.19771e-09
Plekhb2	9.38144e-09	0.183133	0.65	0.601	0.000162468
Pgam1	2.85351e-08	0.182614	0.66	0.622	0.000493201
Acot7	2.03579e-06	0.182573	0.418	0.369	0.0347
Wdr82	1.46904e-07	0.182538	0.465	0.409	0.00252749
Ap2b1	4.09086e-07	0.182079	0.573	0.539	0.00701623
Fscn1	2.09863e-09	0.18174	0.262	0.179	3.64385e-05
Bola3	4.26565e-07	0.181608	0.526	0.469	0.00731474
Dusp26	4.03913e-09	0.181339	0.621	0.562	7.00788e-05
Ttc9b	1.947e-07	0.180963	0.44	0.378	0.00334689
Ypel3	1.62028e-08	0.180578	0.702	0.659	0.000280325
Rpl37a	3.04375e-14	0.17975	0.945	0.919	5.33234e-10
Chmp2b	2.41168e-07	0.179415	0.249	0.18	0.00414302
Trim37	7.54748e-07	0.178513	0.507	0.459	0.0129183
Coa3	7.12675e-08	0.17845	0.592	0.539	0.00122844
Nol7	1.14814e-06	0.178392	0.531	0.49	0.0196195
Ncoa7	2.23659e-06	0.178077	0.626	0.605	0.0381026
Capza1	1.47161e-06	0.177954	0.376	0.316	0.0251159
Rab3a	7.29022e-08	0.177953	0.726	0.681	0.0012564
Napb	5.88888e-10	0.177788	0.743	0.685	1.02449e-05
Atp6v1e1	8.03688e-09	0.177678	0.506	0.437	0.000139231
Bex3	1.10456e-09	0.177246	0.761	0.677	1.91984e-05
Rnf187	1.96125e-09	0.177233	0.666	0.605	3.40571e-05
Ccdc85b	2.18886e-08	0.177108	0.2	0.127	0.000378586
Snrpg	2.53006e-06	0.17564	0.467	0.413	0.0430844
C1d	4.21163e-08	0.175626	0.677	0.63	0.000727349
Rab11fip4	6.71833e-08	0.175544	0.429	0.363	0.00115838
Gnas	1.83281e-15	0.175322	0.938	0.89	3.21511e-11
Cep170b	1.23838e-06	0.175223	0.44	0.388	0.0211541
Rac1	5.64863e-08	0.174478	0.669	0.606	0.000974671
Mtss1l	1.60886e-08	0.174473	0.299	0.219	0.000278364
Rab1a	5.67579e-07	0.174419	0.632	0.574	0.00972603
Dynlrb1	2.02725e-07	0.173851	0.639	0.577	0.00348423
Aes	1.0563e-06	0.17358	0.683	0.637	0.0180553
Vcp	7.79744e-08	0.173521	0.614	0.564	0.00134342
Srpk2	6.00428e-09	0.173428	0.746	0.681	0.000104066
Mrfap1	8.65362e-12	0.173229	0.865	0.799	1.51153e-07
Cox7c	7.42338e-13	0.17313	0.92	0.844	1.29887e-08
Zfhx3	3.40313e-07	0.172769	0.7	0.628	0.00584113
Rpl35	1.2142e-10	0.172026	0.881	0.79	2.11647e-06
Crmp1	1.88648e-06	0.171736	0.507	0.464	0.0321627
Klhdc3	9.41263e-07	0.171238	0.342	0.278	0.0160965
Zwint	6.91914e-12	0.169605	0.9	0.826	1.20891e-07
Prrg3	7.31739e-07	0.168811	0.309	0.242	0.0125259
Pja1	1.53791e-07	0.168649	0.507	0.45	0.00264551
Dnajb1	1.87404e-06	0.168363	0.309	0.249	0.0319543
Ap1b1	5.22559e-07	0.16822	0.407	0.346	0.00895614
Pim2	6.32341e-07	0.168006	0.256	0.188	0.0108307
Drap1	3.57608e-07	0.167967	0.57	0.524	0.00613656
Ppp3cb	6.65995e-07	0.167604	0.657	0.609	0.0114038
Chd5	1.65495e-06	0.167566	0.622	0.58	0.0282352
Timm8b	2.99588e-11	0.167465	0.748	0.672	5.22751e-07
Purb	6.85457e-08	0.167192	0.696	0.645	0.0011818
Pfn1	6.17045e-08	0.165239	0.293	0.215	0.00106422
Dnajb6	1.14064e-08	0.163625	0.572	0.503	0.00019748
Nsg1	2.62603e-14	0.163591	0.865	0.821	4.60133e-10
Pitpnc1	1.33519e-06	0.163412	0.358	0.287	0.0227996
Rnf11	5.6382e-08	0.16341	0.765	0.679	0.000972929
Mgrn1	2.61128e-06	0.163364	0.404	0.348	0.0444544
Sv2a	6.91195e-10	0.163284	0.895	0.888	1.2022e-05
Kif21a	2.60445e-07	0.163164	0.649	0.6	0.00447288
Atox1	2.74895e-06	0.162943	0.391	0.332	0.0467898
Lonrf2	1.08286e-06	0.162862	0.701	0.622	0.0185071
Thra	1.02604e-07	0.162824	0.748	0.709	0.00176653
Shroom2	2.21236e-06	0.162698	0.236	0.173	0.037692
Phpt1	1.66798e-06	0.1626	0.203	0.14	0.0284558
Eif3f	2.2119e-06	0.16236	0.693	0.643	0.0376863
Elavl3	5.74157e-09	0.16221	0.78	0.713	9.95359e-05
Ptges3	2.31266e-07	0.161618	0.71	0.64	0.00397362
Brk1	1.41419e-06	0.161202	0.603	0.561	0.0241403
Gap43	1.82322e-09	0.16117	0.862	0.803	3.16657e-05
Slc25a4	8.57997e-10	0.160913	0.857	0.766	1.49188e-05
Fabp3	8.20429e-08	0.160543	0.366	0.281	0.00141344
mt-Nd6	9.58329e-08	0.159804	0.209	0.134	0.00165043
Rrp1	2.20666e-06	0.15969	0.564	0.523	0.0375993
Rnf208	3.54541e-07	0.159533	0.521	0.458	0.00608427
Rps29	3.87367e-13	0.159387	0.982	0.969	6.77969e-09
Pafah1b1	2.58577e-08	0.158252	0.794	0.721	0.000447002
Map1lc3a	5.79471e-08	0.158182	0.754	0.706	0.000999762
Tro	1.73339e-06	0.157487	0.651	0.608	0.029563
Sec61g	1.20937e-06	0.157407	0.684	0.624	0.0206633
Slc25a1	2.65991e-07	0.157236	0.252	0.182	0.0045676
Ppp2r2d	7.6523e-07	0.155739	0.339	0.276	0.0130961
Actg1	2.54742e-08	0.155652	0.849	0.795	0.000440398
Camk2b	1.26253e-07	0.154506	0.743	0.698	0.00217294
Lrrc17	5.67783e-09	0.154088	0.175	0.102	9.84422e-05
Syt11	5.6806e-16	0.153413	0.948	0.928	9.96718e-12
Carmil2	1.90344e-08	0.152761	0.264	0.186	0.000329258
Hap1	2.01179e-09	0.152617	0.884	0.832	3.49328e-05
Ndufa3	2.44207e-08	0.152372	0.702	0.66	0.000422234
Mapre3	2.91059e-06	0.152139	0.423	0.368	0.0495324
Eno1	5.76412e-07	0.151899	0.287	0.219	0.00987625
St13	8.35878e-07	0.151159	0.68	0.614	0.014301
Calr	2.08153e-10	0.148473	0.766	0.71	3.6256e-06
Gdi1	3.52159e-07	0.147648	0.781	0.739	0.00604375
BC029722	2.08546e-07	0.147076	0.632	0.568	0.00358385
Golgb1	1.16502e-07	0.14409	0.715	0.658	0.00200559
Chd3	1.42845e-06	0.142638	0.812	0.745	0.0243808
Cox5b	2.57973e-06	0.139945	0.713	0.674	0.0439224
Mtch1	1.55911e-07	0.139745	0.748	0.719	0.00268166
Tmem29	2.52516e-06	0.139452	0.394	0.331	0.0430034
Rpl36	4.46763e-08	0.139148	0.923	0.848	0.00077147
Rtl8a	7.9632e-10	0.136782	0.939	0.922	1.38488e-05
Rpl37	6.68378e-08	0.135235	0.968	0.943	0.00115248
Pld3	3.34849e-07	0.134418	0.652	0.596	0.00574769
Ppia	1.47682e-06	0.134358	0.797	0.72	0.0252034
Stmn3	8.82951e-10	0.133705	0.843	0.813	1.53519e-05
Lrrc4b	7.17462e-07	0.130239	0.538	0.477	0.0122822
Uqcrh	9.35917e-07	0.130073	0.873	0.802	0.016007
Camta1	2.20614e-06	0.129863	0.813	0.767	0.0375926
Pigq	2.76028e-06	0.129741	0.244	0.177	0.04698
Vgf	1.25708e-11	0.128335	0.357	0.241	2.19549e-07
Arf1	2.66194e-06	0.126457	0.732	0.713	0.0453116
Atpif1	2.47504e-07	0.126426	0.865	0.83	0.00425113
Cox6a1	1.17235e-07	0.124367	0.784	0.744	0.00201808
Ppm1a	1.36917e-06	0.122413	0.724	0.679	0.0233758
Nsg2	2.40793e-07	0.117495	0.871	0.867	0.00413683
Tmem130	8.16132e-13	0.113384	0.948	0.956	1.42782e-08
Ttc3	2.50748e-09	0.0920499	0.981	0.973	4.35273e-05

## Sheet: Vgat_Female_P23FvsOVX
	p_val	avg_logFC	pct.1	pct.2	p_val_adjust
Nnat	9.16689e-27	0.684304	0.71	0.594	1.63134e-22
Zmym1	1.13458e-79	0.651369	0.67	0.367	2.02351e-75
Tmsb10	3.30781e-150	0.599499	0.97	0.906	5.89981e-146
Mt3	2.31889e-52	0.43394	0.824	0.72	4.13457e-48
Marcksl1	6.56048e-44	0.42936	0.748	0.592	1.16927e-39
Ccnb1ip1	4.44163e-16	0.414676	0.307	0.196	7.87235e-12
Pea15a	2.10403e-39	0.410791	0.783	0.637	3.74917e-35
Selenow	4.09209e-76	0.407669	0.931	0.853	7.29783e-72
Hmgn2	3.06031e-30	0.383158	0.571	0.412	5.44888e-26
Ftl1	2.64223e-41	0.377043	0.89	0.784	4.70899e-37
Atxn7l3b	9.56734e-49	0.376568	0.809	0.685	1.70557e-44
Cbx6	6.64271e-35	0.364962	0.688	0.562	1.18347e-30
Cnih2	1.51724e-35	0.360097	0.704	0.548	2.70327e-31
Irs4	7.47167e-13	0.358142	0.508	0.421	1.31995e-08
Id4	4.2824e-19	0.356525	0.372	0.249	7.60425e-15
Polr2l	6.9549e-31	0.351546	0.413	0.245	1.23839e-26
Bc1	4.17034e-27	0.346653	0.518	0.373	7.42279e-23
Mllt11	3.69877e-40	0.338295	0.825	0.717	6.59122e-36
Ubb	2.983e-40	0.334516	0.889	0.784	5.316e-36
Morf4l2	2.34698e-34	0.331409	0.778	0.644	4.18091e-30
Rps28	7.70199e-51	0.327267	0.947	0.893	1.37319e-46
C1ql3	1.06009e-07	0.322296	0.24	0.171	0.00184773
Gabre	9.31348e-17	0.314436	0.35	0.229	1.65156e-12
Ptms	8.19647e-27	0.310255	0.751	0.629	1.45881e-22
Rtl8b	9.04664e-27	0.30992	0.661	0.543	1.61003e-22
Basp1	9.61143e-35	0.308469	0.851	0.729	1.71228e-30
Rpl41	9.43103e-72	0.307808	0.995	0.99	1.68183e-67
Snrpn	5.03395e-44	0.307353	0.909	0.823	8.97252e-40
Syn2	3.87898e-25	0.305008	0.733	0.606	6.9007e-21
Celf4	8.8114e-53	0.302639	0.953	0.886	1.57116e-48
Marcks	1.30679e-26	0.301673	0.824	0.695	2.32543e-22
Sox2	3.92296e-19	0.298965	0.35	0.222	6.96678e-15
Vat1l	1.22469e-19	0.293568	0.634	0.526	2.1753e-15
Cfl1	8.62373e-33	0.291872	0.851	0.749	1.53589e-28
Tubb3	1.34101e-22	0.289841	0.557	0.426	2.38404e-18
Nap1l5	6.98098e-48	0.287612	0.971	0.945	1.24443e-43
Mbp	1.70697e-15	0.285158	0.413	0.298	3.0239e-11
Ogfrl1	4.74754e-12	0.28457	0.496	0.406	8.37798e-08
Pgr15l	1.19782e-06	0.28119	0.297	0.231	0.0207366
Serf2	2.28786e-25	0.277865	0.842	0.743	4.07056e-21
Ywhaz	1.06127e-31	0.276675	0.854	0.742	1.89001e-27
Dcaf7	9.22422e-22	0.276294	0.634	0.515	1.6397e-17
Ywhab	4.86611e-31	0.274594	0.88	0.79	8.66558e-27
Cops9	4.99458e-31	0.273217	0.843	0.748	8.89384e-27
Snrpg	7.21419e-20	0.272211	0.467	0.336	1.28146e-15
B630019K06Rik	1.86691e-17	0.26676	0.623	0.507	3.31152e-13
Ywhag	1.80721e-33	0.265573	0.901	0.815	3.21901e-29
Ywhah	2.18121e-29	0.260305	0.876	0.784	3.88342e-25
Ypel3	9.68518e-21	0.258027	0.702	0.597	1.72115e-16
Gm47283	2.77806e-15	0.256817	0.58	0.457	4.92023e-11
Gng3	2.86764e-25	0.256398	0.845	0.751	5.10182e-21
Ctnnb1	9.23466e-18	0.256153	0.59	0.479	1.63851e-13
Cltc	2.75572e-23	0.255342	0.803	0.705	4.90021e-19
Rplp0	9.57236e-14	0.254438	0.767	0.678	1.69335e-09
Calm3	6.90023e-25	0.251812	0.845	0.768	1.22748e-20
Serf1	2.7008e-17	0.251253	0.41	0.29	4.79015e-13
Ubfd1	7.54725e-18	0.248151	0.448	0.328	1.33918e-13
Eif1b	2.25769e-17	0.247997	0.743	0.631	4.00447e-13
Ptma	1.07503e-17	0.247258	0.841	0.75	1.90711e-13
Mtpn	4.15926e-19	0.245905	0.712	0.6	7.38601e-15
Eid1	1.42014e-18	0.245732	0.749	0.664	2.52146e-14
Hsph1	5.55807e-16	0.245212	0.597	0.487	9.85001e-12
Oaz1	3.68082e-33	0.244147	0.944	0.869	6.55592e-29
Elob	2.77297e-18	0.243952	0.685	0.575	4.9223e-14
Eef1a2	1.04703e-17	0.242833	0.482	0.36	1.85754e-13
Calr	9.65272e-21	0.242789	0.766	0.663	1.71548e-16
Eif3j1	6.41388e-16	0.242268	0.396	0.289	1.13654e-11
Prkacb	7.53709e-26	0.240985	0.884	0.798	1.34107e-21
Usmg5	1.15685e-24	0.240934	0.796	0.714	2.0577e-20
Nbdy	1.87402e-14	0.238953	0.582	0.498	3.31664e-10
Hmgn3	4.22599e-18	0.238315	0.65	0.538	7.49986e-14
Pak3	1.7125e-16	0.235918	0.765	0.673	3.0361e-12
Rgs4	6.42784e-07	0.234978	0.435	0.368	0.0111484
Fkbp1a	4.64497e-20	0.234432	0.792	0.695	8.25225e-16
Peg10	2.02403e-10	0.233691	0.295	0.212	3.56108e-06
Bola2	1.55835e-16	0.230434	0.569	0.454	2.76311e-12
Caprin1	1.9497e-18	0.229574	0.656	0.555	3.4613e-14
Tubb4a	2.31888e-15	0.228943	0.653	0.556	4.1072e-11
Cited2	1.72076e-10	0.228543	0.348	0.261	3.02802e-06
Cox17	2.94921e-19	0.228431	0.8	0.719	5.23779e-15
Btg1	4.22961e-09	0.225746	0.424	0.339	7.41535e-05
Zic1	1.24426e-07	0.225728	0.337	0.26	0.00216762
Taok3	9.92478e-14	0.224251	0.605	0.51	1.75559e-09
Tsc22d1	1.47002e-14	0.223801	0.726	0.638	2.60209e-10
Ndufa2	1.4686e-20	0.223081	0.824	0.738	2.60971e-16
Hpcal1	8.77866e-08	0.22155	0.378	0.306	0.00153082
Hap1	4.89868e-20	0.221263	0.884	0.782	8.70251e-16
Gnaq	1.88148e-18	0.219415	0.696	0.59	3.34038e-14
Ttc9b	1.93371e-16	0.21879	0.44	0.319	3.42749e-12
Mrfap1	9.57332e-23	0.217462	0.865	0.778	1.70204e-18
Atp5k	7.08881e-20	0.217263	0.767	0.664	1.25926e-15
Peg3	3.65309e-24	0.213688	0.914	0.858	6.49739e-20
Six3	5.06466e-07	0.213026	0.221	0.154	0.00879377
Prrt1	1.16283e-09	0.2126	0.387	0.305	2.04146e-05
Map1lc3b	5.02773e-15	0.211966	0.477	0.375	8.9016e-11
Celf6	3.45552e-13	0.21066	0.576	0.487	6.10764e-09
Fkbp4	2.13325e-14	0.208952	0.435	0.326	3.775e-10
Pycr2	2.57811e-06	0.208668	0.165	0.11	0.0445369
Rasgrf2	2.91984e-08	0.208571	0.514	0.447	0.0005103
Ndufv3	4.17352e-14	0.207662	0.58	0.487	7.38463e-10
Jund	1.17464e-10	0.207327	0.414	0.328	2.06771e-06
Gda	6.04979e-07	0.206878	0.43	0.355	0.0104976
Wdr82	4.73995e-14	0.205594	0.465	0.36	8.38591e-10
Ppp2r2c	4.33081e-12	0.205473	0.612	0.537	7.64301e-08
Uqcr10	1.76643e-16	0.205087	0.827	0.74	3.13135e-12
Cnot3	4.68587e-15	0.205043	0.405	0.29	8.29727e-11
Kcns2	3.32774e-11	0.20479	0.159	0.086	5.86382e-07
Pkig	1.02738e-11	0.204595	0.613	0.519	1.81188e-07
Romo1	3.29902e-15	0.203901	0.593	0.485	5.84256e-11
Oaz2	1.2679e-14	0.203713	0.718	0.615	2.24444e-10
Ywhae	3.31317e-20	0.203688	0.865	0.753	5.88685e-16
Aes	2.8628e-11	0.20315	0.683	0.602	5.04539e-07
Uqcr11	3.70549e-15	0.202803	0.674	0.582	6.56168e-11
Ndufaf8	1.1504e-09	0.202553	0.503	0.431	2.01976e-05
Ube2r2	4.995e-12	0.202414	0.525	0.434	8.81367e-08
Eif4g2	3.43552e-17	0.202017	0.852	0.746	6.09255e-13
Gnao1	6.5415e-16	0.201032	0.824	0.736	1.15909e-11
Clip3	1.53172e-13	0.200964	0.719	0.638	2.70853e-09
Cbarp	6.86567e-21	0.200476	0.921	0.874	1.22024e-16
Tma7	1.44921e-17	0.200235	0.886	0.811	2.57076e-13
Fem1b	5.92564e-12	0.200068	0.515	0.429	1.04534e-07
Alg2	1.34768e-16	0.19978	0.75	0.664	2.38971e-12
Ina	8.85042e-12	0.199214	0.636	0.556	1.56095e-07
Pura	1.67016e-16	0.199128	0.803	0.723	2.96119e-12
Gnaz	6.96482e-13	0.199016	0.6	0.502	1.23048e-08
Ap2m1	1.74719e-14	0.198541	0.674	0.581	3.09235e-10
A730017C20Rik	3.31209e-12	0.197899	0.657	0.56	5.8465e-08
Hras	4.94056e-12	0.197676	0.582	0.487	8.71811e-08
1500011B03Rik	1.09994e-13	0.196462	0.747	0.656	1.94558e-09
Oxct1	1.59403e-09	0.196316	0.456	0.379	2.79737e-05
Tmem256	5.13368e-10	0.196286	0.517	0.437	9.0209e-06
Ppdpf	2.41461e-11	0.196207	0.442	0.349	4.25648e-07
Dynll1	8.52133e-13	0.196177	0.758	0.673	1.50521e-08
Sox4	1.88828e-08	0.195825	0.323	0.246	0.00033026
Dnajb1	1.23969e-11	0.195187	0.309	0.216	2.18594e-07
Ttyh3	4.81291e-11	0.194219	0.413	0.32	8.47794e-07
Hist3h2ba	2.84476e-10	0.194073	0.336	0.242	5.00337e-06
Apoc3	6.04885e-08	0.193917	0.132	0.076	0.00105558
Ndufc1	4.26621e-12	0.193715	0.68	0.591	7.52943e-08
Mtss1l	2.54072e-12	0.193055	0.299	0.202	4.48564e-08
Bex2	2.20488e-13	0.192525	0.828	0.729	3.89801e-09
Enho	3.73058e-11	0.192057	0.356	0.264	6.57253e-07
Npepps	7.79744e-11	0.191632	0.59	0.51	1.37282e-06
Tuba1a	1.5993e-11	0.191579	0.715	0.623	2.81972e-07
Dlk1	5.40582e-07	0.191576	0.434	0.341	0.00938396
Ppp2ca	2.4915e-13	0.190884	0.675	0.589	4.40448e-09
Ywhaq	5.24968e-15	0.19019	0.756	0.684	9.29403e-11
Mapt	9.60242e-18	0.189736	0.849	0.752	1.70366e-13
Sec61g	2.62333e-11	0.189733	0.684	0.585	4.62388e-07
H3f3b	4.02189e-11	0.189107	0.829	0.743	7.08497e-07
Hspa4	3.80358e-11	0.187932	0.475	0.387	6.70077e-07
Hmgn1	6.69745e-11	0.187796	0.712	0.629	1.17955e-06
Hnrnpc	3.84454e-12	0.187415	0.559	0.461	6.78561e-08
Akap17b	1.27897e-06	0.187114	0.239	0.181	0.0221364
Pdxp	6.1833e-13	0.186655	0.643	0.561	1.09253e-08
Rnf187	1.05829e-12	0.185524	0.666	0.578	1.86905e-08
Hdgf	1.61999e-10	0.185387	0.565	0.486	2.85085e-06
Ift22	2.11125e-09	0.185196	0.297	0.217	3.70377e-05
Sec61b	5.20268e-08	0.184409	0.486	0.415	0.000908181
Dnaja1	2.1313e-12	0.183876	0.698	0.62	3.76366e-08
Elavl3	3.91507e-13	0.183523	0.78	0.695	6.9191e-09
Map1lc3a	4.12309e-13	0.183518	0.754	0.676	7.28592e-09
Gm9844	1.90829e-14	0.183321	0.186	0.098	3.3771e-10
Nedd8	6.41222e-12	0.18315	0.694	0.613	1.13105e-07
Ube2s	3.92959e-10	0.182329	0.568	0.474	6.90704e-06
Mt1	2.91167e-10	0.182064	0.477	0.385	5.12016e-06
Zdbf2	1.09423e-09	0.181816	0.53	0.455	1.92125e-05
Csnk1d	1.30496e-09	0.181448	0.432	0.35	2.29047e-05
Camk2n1	2.6747e-08	0.181313	0.606	0.536	0.000467537
Nedd4	2.33697e-12	0.179589	0.764	0.678	4.12639e-08
Sncb	5.36687e-08	0.179152	0.639	0.578	0.000936787
Ube2m	3.55724e-08	0.179143	0.394	0.325	0.000621415
Gnas	3.21682e-18	0.179051	0.938	0.904	5.70953e-14
Hypk	1.18162e-09	0.178809	0.512	0.427	2.07433e-05
AI413582	6.94632e-11	0.178371	0.488	0.409	1.22332e-06
Tcea1	2.8707e-10	0.178201	0.37	0.282	5.0487e-06
Ap3s1	1.92626e-09	0.17787	0.439	0.356	3.37982e-05
Myl6	5.13413e-11	0.177663	0.658	0.573	9.04326e-07
Zc3h15	3.63694e-12	0.177436	0.563	0.464	6.41956e-08
Higd2a	4.95178e-09	0.177264	0.5	0.428	8.68097e-05
Zbtb20	1.65306e-07	0.177172	0.723	0.656	0.00287748
Zfp706	5.40101e-13	0.176977	0.645	0.546	9.54358e-09
Capza1	8.36055e-10	0.176929	0.376	0.291	1.46853e-05
Eif1	2.87036e-18	0.176616	0.94	0.876	5.09489e-14
Rab7	6.58516e-13	0.176334	0.604	0.496	1.16347e-08
Rab26os	1.35055e-10	0.176136	0.399	0.312	2.37711e-06
Usp50	1.73847e-11	0.17567	0.322	0.228	3.06492e-07
Mapk1	7.31054e-11	0.175357	0.703	0.635	1.28731e-06
Rhob	2.89453e-10	0.174533	0.421	0.331	5.09032e-06
Ago2	1.0197e-08	0.174	0.512	0.442	0.000178549
Vapa	2.09618e-10	0.173819	0.504	0.417	3.68782e-06
Anapc11	4.76619e-10	0.173399	0.414	0.323	8.37562e-06
Bola3	1.54116e-11	0.172785	0.526	0.432	2.71737e-07
Zfr	1.82621e-10	0.172216	0.68	0.602	3.21341e-06
Sarnp	1.02529e-09	0.171975	0.471	0.399	1.80051e-05
Capzb	2.86217e-08	0.171898	0.457	0.38	0.00050025
Bri3	8.46019e-10	0.171725	0.58	0.493	1.48595e-05
Elovl5	3.9387e-08	0.171451	0.251	0.177	0.000687934
Pop5	3.18582e-08	0.17065	0.396	0.318	0.000556658
Ndufa7	7.62722e-10	0.170292	0.582	0.503	1.33995e-05
Pnmal2	1.39598e-13	0.170179	0.879	0.776	2.46866e-09
Dynll2	2.31473e-15	0.169592	0.881	0.815	4.10008e-11
Zfhx3	1.56227e-09	0.169489	0.7	0.596	2.74178e-05
Hsbp1	3.0895e-09	0.168557	0.658	0.572	5.41774e-05
Uba52	2.40407e-10	0.168408	0.416	0.322	4.229e-06
Pfn1	1.54244e-10	0.167594	0.293	0.203	2.71453e-06
Pak1	2.11514e-09	0.167257	0.633	0.56	3.71038e-05
Tln1	3.07603e-09	0.167054	0.392	0.313	5.39444e-05
Ctxn1	3.465e-07	0.166998	0.617	0.537	0.00602147
Smarca2	2.73698e-12	0.166744	0.688	0.593	4.83159e-08
Phpt1	3.02733e-08	0.166311	0.203	0.136	0.000528996
Pnmal1	7.27474e-11	0.166117	0.633	0.544	1.28108e-06
Apbb1	1.21434e-09	0.166048	0.508	0.427	2.13166e-05
Fam57b	6.44608e-11	0.165668	0.266	0.174	1.13535e-06
Timm10b	8.08505e-09	0.165325	0.388	0.311	0.00014161
Baiap2	1.87985e-07	0.165095	0.296	0.225	0.00327113
Hspa5	8.16657e-10	0.165066	0.579	0.486	1.43454e-05
D8Ertd738e	3.69312e-10	0.164746	0.686	0.609	6.49213e-06
Gm1673	7.43245e-09	0.164676	0.781	0.747	0.000130231
Dusp26	8.73191e-09	0.163046	0.621	0.556	0.000152922
Snx3	8.53995e-08	0.162531	0.445	0.374	0.00148928
Atp6v0d1	9.68097e-09	0.162302	0.502	0.416	0.000169524
Atp5e	3.09206e-11	0.16227	0.718	0.635	5.44884e-07
Syn1	1.44564e-07	0.161503	0.554	0.496	0.00251715
Tmem176b	8.07581e-09	0.161213	0.146	0.084	0.000141456
Stub1	1.82909e-08	0.16082	0.599	0.525	0.000319926
Pdap1	8.94896e-09	0.16036	0.627	0.544	0.000156714
Nop10	7.59181e-09	0.159758	0.599	0.531	0.000133001
Pcbp1	2.1667e-07	0.159487	0.478	0.415	0.00376919
Nudt11	7.72169e-07	0.159458	0.391	0.328	0.013384
Hist3h2a	3.19035e-10	0.158805	0.214	0.136	5.6096e-06
Ubqln1	1.33823e-08	0.158023	0.51	0.433	0.000234204
Cx3cl1	3.4777e-08	0.157593	0.641	0.574	0.000607554
B4galt6	1.6878e-08	0.157567	0.792	0.733	0.000295247
Hmgb1	1.58618e-08	0.156968	0.642	0.578	0.000277533
Glul	1.1328e-07	0.15651	0.286	0.214	0.00197413
Calm1	4.39653e-14	0.155872	0.895	0.818	7.77879e-10
Dtx3	6.14018e-07	0.155466	0.503	0.445	0.0106532
Ndufa3	4.00737e-10	0.155078	0.702	0.638	7.04335e-06
Lrrc4b	1.51139e-08	0.155024	0.538	0.46	0.000264477
Mapre3	7.05499e-08	0.154213	0.423	0.35	0.00123088
Gatsl2	7.3016e-08	0.153576	0.533	0.468	0.00127369
Tspyl3	1.11237e-07	0.153436	0.304	0.231	0.00193875
Coa3	5.97999e-09	0.153238	0.592	0.518	0.000104805
C1qtnf4	3.41291e-09	0.153155	0.475	0.398	5.98455e-05
Wdr26	5.63475e-08	0.152569	0.395	0.317	0.000983433
Bad	1.91999e-07	0.152522	0.29	0.223	0.00334078
Gng2	1.38709e-07	0.15206	0.74	0.668	0.0024159
Mtmr4	1.39308e-08	0.151736	0.342	0.258	0.000243789
Ncor2	1.92799e-07	0.151502	0.322	0.253	0.00335451
H3f3a	3.67464e-07	0.151246	0.5	0.43	0.00638432
Bex3	2.61418e-09	0.15115	0.761	0.684	4.58526e-05
Gsk3a	4.90945e-08	0.150855	0.393	0.318	0.000857092
Cox6a1	1.54583e-13	0.150752	0.784	0.7	2.73333e-09
Eif4h	7.51344e-09	0.150589	0.585	0.512	0.000131643
Slc2a3	3.62309e-08	0.150549	0.448	0.367	0.000632882
Mafg	2.59099e-08	0.149676	0.397	0.318	0.000452931
Atp6v1a	1.02864e-09	0.149441	0.799	0.732	1.80629e-05
Grb10	7.46759e-08	0.148947	0.61	0.543	0.00130257
Atp6v1b2	4.26617e-08	0.148764	0.736	0.678	0.000744959
Pim2	3.49514e-10	0.148675	0.256	0.17	6.14446e-06
Rpl36al	2.55806e-07	0.14822	0.713	0.647	0.00444821
Pfn2	1.29463e-09	0.148115	0.767	0.701	2.27246e-05
Tollip	3.85568e-07	0.148016	0.369	0.302	0.0066977
Trib2	1.17183e-06	0.147827	0.244	0.184	0.0202891
Tmem29	1.6904e-09	0.147796	0.394	0.309	2.96632e-05
Cdk5r1	1.64122e-07	0.14773	0.695	0.641	0.0028572
Fabp3	1.34391e-06	0.147627	0.366	0.299	0.0232563
Wdr6	9.91013e-08	0.147246	0.721	0.654	0.00172773
Atox1	2.07198e-08	0.147208	0.391	0.311	0.000362307
Atp5g1	2.15476e-08	0.146972	0.685	0.629	0.000376761
Akirin2	1.82368e-06	0.146872	0.301	0.24	0.0315277
Dlg4	9.44723e-08	0.146528	0.67	0.602	0.00164722
Mkrn1	3.43991e-10	0.14634	0.344	0.253	6.04804e-06
Wbp4	1.64e-08	0.146083	0.55	0.47	0.000286901
Gmfb	5.8447e-07	0.145265	0.462	0.389	0.0101423
Pafah1b2	7.16464e-08	0.145141	0.648	0.59	0.00124994
Rmst	1.40985e-07	0.145127	0.453	0.362	0.00245539
Arpc5l	3.61131e-07	0.145071	0.53	0.462	0.00627465
1110065P20Rik	1.64445e-07	0.144924	0.508	0.434	0.00286267
Rap2a	6.38982e-07	0.144412	0.304	0.236	0.0110838
Rps27	7.65363e-11	0.144049	0.968	0.962	1.34757e-06
2300009A05Rik	4.04066e-08	0.14394	0.443	0.364	0.000705662
Ahi1	5.11524e-12	0.143722	0.943	0.904	9.02534e-08
Cdk5r2	1.12835e-07	0.143524	0.399	0.328	0.00196648
Cib2	1.32778e-07	0.143357	0.481	0.405	0.00231273
Atpif1	3.46368e-10	0.142892	0.865	0.801	6.0895e-06
Hspd1	1.58823e-06	0.142855	0.465	0.396	0.02747
Ubqln2	7.89008e-07	0.142666	0.574	0.511	0.0136743
Pja1	1.76008e-08	0.142097	0.507	0.428	0.000307873
2900011O08Rik	6.31251e-07	0.141747	0.566	0.499	0.0109503
Dpysl5	1.236e-06	0.141623	0.317	0.252	0.0213963
Ppp1cb	5.82425e-09	0.141317	0.704	0.626	0.000102087
Camk2b	3.75309e-09	0.141314	0.743	0.668	6.58066e-05
B230219D22Rik	7.43878e-07	0.141297	0.636	0.575	0.0128959
Trim37	2.20656e-07	0.141274	0.507	0.438	0.0038383
Lamtor3	1.00631e-07	0.140999	0.285	0.216	0.00175431
Gadd45gip1	3.84789e-08	0.140838	0.345	0.265	0.000672111
Pja2	7.54137e-09	0.140581	0.815	0.739	0.000132125
Rims4	4.55617e-08	0.140483	0.222	0.152	0.000795508
Klhdc10	4.29514e-07	0.140424	0.536	0.474	0.00746066
Strap	1.36947e-06	0.140359	0.415	0.353	0.0236959
Rab10	2.66171e-07	0.139847	0.596	0.532	0.00462817
Ankrd46	4.33009e-08	0.139797	0.437	0.363	0.000756077
Tmem242	2.80221e-06	0.139769	0.418	0.355	0.0483913
AW551984	1.23454e-07	0.13973	0.589	0.505	0.00215093
Vdac1	5.38326e-07	0.13956	0.623	0.573	0.00934534
Tcf25	2.82849e-08	0.139533	0.763	0.712	0.000494392
Tnks2	2.52582e-08	0.139415	0.37	0.289	0.000441564
Rpl37a	2.50718e-10	0.139343	0.945	0.919	4.40988e-06
Ankrd50	1.81322e-06	0.138834	0.246	0.184	0.0313487
Cox8a	8.45537e-13	0.138666	0.933	0.891	1.49364e-08
Pigq	1.01661e-09	0.138654	0.244	0.162	1.78536e-05
Rtl8a	1.25198e-13	0.138618	0.939	0.902	2.21426e-09
Adap1	9.0954e-08	0.138131	0.269	0.2	0.00158597
Brk1	4.22891e-09	0.138023	0.603	0.523	7.41455e-05
Fscn1	3.06852e-09	0.137775	0.262	0.183	5.38157e-05
Sobp	3.52967e-07	0.137608	0.451	0.376	0.00613315
Klc1	5.80613e-08	0.137552	0.681	0.613	0.00101329
Timm8b	5.58472e-08	0.137495	0.748	0.681	0.000974758
Abhd8	8.35739e-07	0.137019	0.503	0.443	0.0144825
Tpi1	3.19174e-07	0.13684	0.615	0.552	0.0055482
Lonrf2	3.83175e-07	0.136578	0.701	0.632	0.00665652
1810058I24Rik	2.10352e-06	0.136019	0.233	0.175	0.0363573
Rnf11	1.48523e-07	0.135651	0.765	0.692	0.00258593
Nono	7.02143e-07	0.135578	0.503	0.438	0.0121745
Pdgfa	3.2773e-07	0.135342	0.508	0.443	0.00569627
Atp6v1e1	5.78672e-07	0.134964	0.506	0.435	0.0100429
Dlgap4	7.47602e-07	0.134639	0.487	0.421	0.0129589
Irs2	2.17812e-06	0.134056	0.241	0.182	0.0376423
Cmas	2.61605e-06	0.133891	0.514	0.445	0.0451844
BC029722	3.03968e-07	0.133705	0.632	0.563	0.00528417
Stmn1	6.99641e-07	0.13359	0.753	0.672	0.0121318
Gdi1	6.27743e-08	0.132343	0.781	0.718	0.00109541
Apoe	7.19447e-09	0.131345	0.129	0.069	0.000126069
Tmem130	6.1758e-16	0.130623	0.948	0.933	1.09441e-11
Fam91a1	2.3504e-06	0.130085	0.321	0.255	0.0406103
Stxbp1	2.28882e-08	0.129922	0.816	0.752	0.000400177
Tubb2a	1.42093e-07	0.129909	0.507	0.43	0.0024744
Nsg1	4.71903e-10	0.129795	0.865	0.8	8.29322e-06
Rac1	2.40153e-07	0.129109	0.669	0.598	0.00417651
Tmem107	1.23905e-08	0.129057	0.206	0.133	0.000216883
Actn1	1.28871e-07	0.128665	0.217	0.148	0.00224481
Eif5a	6.30356e-07	0.128537	0.655	0.595	0.0109354
Sdf2l1	1.60012e-08	0.128299	0.149	0.086	0.000279957
Prkaca	1.75352e-06	0.128215	0.659	0.605	0.0303202
Fndc3a	1.62648e-07	0.127965	0.518	0.441	0.0028317
Calm2	1.67126e-13	0.12739	0.934	0.892	2.95495e-09
Maz	2.75563e-07	0.126956	0.292	0.222	0.00479093
Cdc42	9.15e-07	0.12639	0.657	0.589	0.0158505
Gm42067	2.98855e-08	0.126383	0.214	0.141	0.000522279
Snap47	2.75899e-06	0.125556	0.582	0.519	0.0476478
Celf2	2.72419e-06	0.125119	0.709	0.658	0.0470494
Vcp	2.68309e-07	0.125107	0.614	0.546	0.00466508
mt-Atp8	6.65964e-08	0.125052	0.647	0.562	0.00116197
Sem1	1.17496e-07	0.124892	0.782	0.723	0.00204748
Ift20	9.61111e-08	0.124866	0.628	0.557	0.0016757
Flywch2	1.56931e-06	0.124803	0.257	0.195	0.0271459
Arfgef3	5.61585e-07	0.124579	0.721	0.655	0.00974688
Ythdf1	5.20898e-07	0.124277	0.188	0.127	0.00904384
Xist	2.3368e-06	0.12419	0.982	0.974	0.0403776
Gapdh	1.50392e-06	0.124145	0.568	0.517	0.0260193
Spock2	3.26773e-07	0.123914	0.811	0.758	0.00567997
Vgf	2.92257e-11	0.123868	0.357	0.245	5.15044e-07
Chtop	1.71018e-06	0.123711	0.425	0.361	0.0295725
Pld3	3.41273e-08	0.123508	0.652	0.58	0.000596239
Cep170b	9.723e-07	0.123336	0.44	0.371	0.0168393
Zmynd11	7.7419e-07	0.122532	0.587	0.51	0.0134183
Dnm1l	1.0059e-06	0.121646	0.64	0.575	0.0174192
Atp1a3	7.67749e-10	0.121444	0.775	0.725	1.3487e-05
Vamp2	5.84421e-07	0.120589	0.835	0.754	0.010142
Aldoa	5.45949e-07	0.120432	0.718	0.641	0.00947658
Syp	8.58807e-07	0.120031	0.867	0.842	0.0148814
Prrg3	4.62154e-07	0.118238	0.309	0.238	0.0080253
Adgrl1	6.2786e-08	0.11679	0.738	0.685	0.00109555
Nrsn2	1.70368e-07	0.114792	0.864	0.829	0.00296526
Dcaf5	1.33033e-06	0.113669	0.315	0.248	0.0230227
Ndufab1	1.6565e-06	0.113537	0.543	0.479	0.0286492
Gpx4	4.89577e-07	0.113494	0.827	0.771	0.00850101
Psma7	1.96336e-06	0.112939	0.566	0.498	0.0339386
6330403K07Rik	1.4174e-07	0.112885	0.917	0.866	0.0024684
Sub1	1.95057e-06	0.112233	0.766	0.688	0.0337196
Rpl37	7.97089e-08	0.11174	0.968	0.957	0.00139012
Tmsb4x	1.18239e-08	0.111096	0.966	0.955	0.000206989
Carmil2	3.97043e-08	0.109845	0.264	0.187	0.000693435
Tsc22d3	2.40685e-06	0.10889	0.314	0.245	0.0415832
Rap1gap	2.40791e-06	0.108479	0.44	0.37	0.041599
Scoc	8.22498e-07	0.108418	0.761	0.695	0.0142539
Prkar1a	9.81672e-07	0.108351	0.845	0.787	0.0170006
Gm26917	9.39764e-07	0.107274	0.538	0.472	0.0162776
Prkar1b	1.67474e-06	0.107079	0.803	0.741	0.0289629
Stmn2	1.18126e-06	0.106415	0.89	0.841	0.0204511
Serp2	2.2518e-06	0.105449	0.795	0.736	0.0389133
Ndufb2	8.86274e-07	0.105314	0.612	0.555	0.0153556
AC149090.1	1.44379e-09	0.103206	0.759	0.695	2.53399e-05
Gemin7	2.88159e-06	0.102912	0.322	0.256	0.0497593
Cdk2ap1	9.5145e-07	0.101847	0.162	0.105	0.0164791
Lrrc17	6.0592e-07	0.10032	0.175	0.115	0.0105133
Ubac1	1.34436e-06	0.0979701	0.192	0.13	0.0232627
Evi5l	4.38357e-07	0.0977649	0.275	0.203	0.00761295

## Sheet: Vgat_Female_P35FvsP23F
	p_val	avg_logFC	pct.1	pct.2	p_val_adjust
mt-Nd3	1.8727e-99	0.533734	0.974	0.873	3.35904e-95
Rps12	5.61487e-80	0.46483	0.887	0.865	1.00692e-75
Rsrp1	4.27391e-58	0.44525	0.924	0.752	7.66056e-54
Rps10	2.68482e-78	0.440718	0.912	0.86	4.81441e-74
Rplp1	5.3767e-117	0.435737	0.98	0.952	9.6448e-113
Rpl30	4.69061e-73	0.408993	0.911	0.883	8.41073e-69
Rps20	4.33485e-69	0.400942	0.902	0.86	7.77151e-65
Rps24	4.49167e-80	0.396271	0.944	0.922	8.05537e-76
Rpl12	3.59745e-53	0.384202	0.877	0.822	6.44446e-49
Rpl7	1.45109e-59	0.38415	0.905	0.827	2.60122e-55
Rpl22l1	8.94483e-72	0.356547	0.963	0.92	1.60372e-67
Rps15	3.8753e-81	0.351513	0.975	0.941	6.95035e-77
Rpl5	1.55012e-40	0.342147	0.822	0.718	2.77486e-36
Rps17	3.66956e-54	0.334829	0.908	0.881	6.57511e-50
mt-Nd2	3.20364e-72	0.3337	0.999	0.993	5.74413e-68
Rpl21	3.35434e-61	0.305417	0.972	0.945	6.01332e-57
Rpl23	1.40814e-55	0.30328	0.957	0.933	2.52366e-51
Eef1b2	1.22178e-31	0.302063	0.776	0.654	2.18467e-27
Rpl8	3.45429e-55	0.300439	0.975	0.933	6.19009e-51
Eef1a1	2.03838e-44	0.299677	0.977	0.95	3.65013e-40
Tpt1	4.75823e-32	0.297184	0.858	0.775	8.50868e-28
Rpl19	1.49277e-53	0.296307	0.957	0.92	2.6746e-49
Nptn	9.61538e-25	0.295248	0.764	0.58	1.71808e-20
Rps16	1.49465e-43	0.292498	0.926	0.901	2.67631e-39
Rplp2	1.2305e-42	0.292237	0.95	0.923	2.20309e-38
Rps25	4.32136e-47	0.288719	0.939	0.92	7.74042e-43
Prune2	1.7836e-23	0.287131	0.534	0.337	3.18622e-19
Gm10076	3.58625e-33	0.28688	0.655	0.426	6.41473e-29
Rpl23a	2.96137e-54	0.286548	0.975	0.952	5.30648e-50
Rpl32	3.13822e-46	0.284307	0.954	0.92	5.62087e-42
Rpl27a	2.23722e-53	0.28312	0.968	0.947	4.0082e-49
Rps8	2.20094e-55	0.281844	0.987	0.951	3.9443e-51
Rps3a1	4.65918e-40	0.279953	0.917	0.898	8.33994e-36
Npm1	8.41709e-30	0.27397	0.86	0.766	1.50481e-25
Rps27a	3.48525e-45	0.267629	0.963	0.935	6.24208e-41
mt-Co2	1.05049e-58	0.266903	1	1	1.883e-54
Rpl11	4.55046e-42	0.265584	0.957	0.925	8.14623e-38
Rpl18	3.50753e-30	0.265041	0.86	0.779	6.27147e-26
Rpsa	1.28209e-34	0.264792	0.908	0.859	2.29379e-30
Rpl26	3.96814e-45	0.26017	0.96	0.935	7.10654e-41
Rpl7a	2.99325e-28	0.259019	0.848	0.785	5.35044e-24
Rpl17	4.48219e-51	0.258376	0.982	0.951	8.02896e-47
Scd2	5.04322e-23	0.255108	0.813	0.653	9.00819e-19
Rps11	1.11214e-39	0.254457	0.95	0.926	1.9905e-35
Rps3	5.23029e-35	0.254064	0.932	0.903	9.35855e-31
Rps14	3.66862e-34	0.252469	0.968	0.932	6.56316e-30
Rps21	8.35348e-40	0.252337	0.944	0.935	1.49519e-35
Fau	2.37481e-42	0.245396	0.973	0.941	4.25163e-38
Rps5	1.33767e-35	0.243893	0.961	0.922	2.3939e-31
Penk	4.15819e-09	0.243456	0.263	0.168	7.35209e-05
Rpl9	3.18397e-43	0.243187	0.957	0.936	5.70089e-39
Gm26699	3.27629e-25	0.24124	0.431	0.228	5.85472e-21
Apba1	2.31201e-32	0.237692	0.29	0.11	4.1348e-28
Insig1	4.841e-14	0.237315	0.285	0.162	8.61795e-10
Rps23	6.72084e-33	0.235037	0.963	0.942	1.20209e-28
Eef2	2.95246e-24	0.233366	0.833	0.716	5.27486e-20
Rpl31	1.69176e-37	0.226638	0.963	0.949	3.02774e-33
Tcp1	7.17642e-21	0.224417	0.636	0.451	1.28092e-16
Rps13	1.78916e-29	0.221784	0.923	0.896	3.19848e-25
Zfp941	1.30373e-21	0.220826	0.353	0.187	2.32742e-17
Rack1	3.49313e-20	0.21501	0.711	0.56	6.2335e-16
Rpl10a	1.12232e-22	0.212363	0.907	0.871	2.00434e-18
Rps15a	2.31063e-22	0.210579	0.909	0.902	4.12609e-18
Hspa8	2.24135e-15	0.21054	0.875	0.834	3.99341e-11
Rpl22	2.65408e-17	0.210509	0.746	0.631	4.73195e-13
Frrs1l	5.09226e-20	0.209402	0.689	0.495	9.08663e-16
Cox7a2l	1.01643e-21	0.208	0.872	0.808	1.81463e-17
Rpl39	1.42547e-26	0.206106	0.956	0.931	2.5476e-22
Rps19	3.99329e-28	0.205873	0.958	0.937	7.1376e-24
Rpl29	9.90405e-22	0.204172	0.884	0.849	1.76827e-17
Rpl28	5.86279e-22	0.204142	0.898	0.843	1.04686e-17
Rps4x	1.10502e-22	0.199697	0.941	0.92	1.97356e-18
Rpl14	6.82867e-25	0.199557	0.933	0.923	1.22022e-20
Esr1	1.3301e-15	0.199212	0.365	0.226	2.37023e-11
Rpl24	1.4776e-27	0.196386	0.969	0.935	2.64091e-23
mt-Atp6	6.24742e-34	0.191682	1	1	1.11754e-29
Rpl4	9.51802e-23	0.188136	0.923	0.88	1.70001e-18
Rtraf	1.0633e-13	0.186633	0.67	0.53	1.89267e-09
Rps27rt	1.68535e-15	0.186297	0.77	0.663	3.00296e-11
Hapln4	2.93509e-14	0.184677	0.288	0.166	5.22564e-10
Rpl35a	2.03209e-23	0.183124	0.951	0.935	3.62991e-19
Plp1	2.62877e-19	0.182942	0.623	0.432	4.68947e-15
Rbm3	2.32281e-18	0.182427	0.442	0.271	4.14227e-14
Wdr89	1.31417e-18	0.180038	0.455	0.282	2.34396e-14
Btf3	8.2144e-15	0.179604	0.683	0.555	1.46298e-10
Epdr1	4.43006e-15	0.179465	0.47	0.31	7.8926e-11
Eif4a2	8.59475e-17	0.17842	0.929	0.914	1.53201e-12
Rps7	1.23075e-20	0.174775	0.927	0.914	2.19664e-16
Gm10073	2.05749e-22	0.174611	0.218	0.085	3.67427e-18
Rab3c	4.22035e-10	0.174311	0.716	0.598	7.47803e-06
Zfp512	8.7933e-15	0.173347	0.472	0.317	1.566e-10
Dhcr24	1.18642e-10	0.169935	0.272	0.168	2.10483e-06
Inpp4a	1.73784e-10	0.168279	0.531	0.405	3.0824e-06
Naca	8.00186e-15	0.167925	0.862	0.835	1.42521e-10
Pfdn5	9.67236e-15	0.167779	0.875	0.86	1.72245e-10
Cyb5b	1.05126e-12	0.16734	0.436	0.295	1.86956e-08
Oprk1	9.39202e-09	0.166758	0.323	0.222	0.00016591
Fam213b	5.69282e-13	0.165437	0.53	0.383	1.01264e-08
Rps2	5.48777e-17	0.163889	0.953	0.911	9.78306e-13
Pfdn2	3.58499e-12	0.163771	0.847	0.789	6.37268e-08
Paip1	3.30535e-11	0.163261	0.394	0.266	5.86832e-07
Rpl10	8.34436e-17	0.162143	0.932	0.922	1.48747e-12
Cadm2	2.15402e-10	0.161994	0.517	0.382	3.81972e-06
Snn	2.30863e-12	0.161014	0.392	0.261	4.10474e-08
Zscan26	2.12738e-12	0.160699	0.421	0.282	3.78269e-08
Eef1d	4.18441e-13	0.157873	0.332	0.204	7.44406e-09
Scn2b	1.87605e-07	0.157621	0.666	0.545	0.00329716
Nop53	7.75011e-12	0.157043	0.475	0.335	1.37673e-07
2610507B11Rik	1.07901e-12	0.15571	0.394	0.258	1.9188e-08
Eef1g	2.90409e-16	0.155396	0.932	0.888	5.17567e-12
Rpl15	3.18582e-14	0.155367	0.896	0.871	5.67172e-10
Rpl18a	1.46756e-18	0.154998	0.96	0.932	2.61739e-14
Gabrg1	2.36411e-09	0.152909	0.448	0.326	4.18188e-05
Ssr4	4.15977e-12	0.152373	0.56	0.416	7.39275e-08
Dbpht2	1.43703e-07	0.151923	0.495	0.385	0.00252674
M6pr	1.27279e-11	0.15139	0.391	0.26	2.26048e-07
Eif3k	4.08514e-12	0.150106	0.706	0.585	7.26052e-08
Plppr4	2.53149e-13	0.149419	0.728	0.568	4.50454e-09
Rpl36a	2.54622e-12	0.149016	0.899	0.885	4.52692e-08
Unc80	4.72759e-10	0.1483	0.776	0.654	8.3754e-06
Camkv	9.34462e-11	0.147925	0.392	0.268	1.6582e-06
Cds2	6.31754e-11	0.14756	0.83	0.699	1.1213e-06
Cers4	1.3259e-10	0.147552	0.708	0.572	2.35202e-06
Chp1	9.04046e-10	0.146767	0.558	0.426	1.60088e-05
Golt1b	1.8188e-09	0.145193	0.29	0.188	3.21836e-05
Rpl13	3.19972e-20	0.143697	0.982	0.959	5.71022e-16
Clta	3.57884e-10	0.141112	0.721	0.602	6.34278e-06
Marf1	2.9312e-10	0.139328	0.5	0.368	5.19644e-06
Uvssa	3.22128e-10	0.138741	0.194	0.108	5.71004e-06
Rpl34	2.61656e-14	0.138618	0.923	0.911	4.65906e-10
Gabrq	1.56854e-08	0.137819	0.516	0.395	0.000276879
Msmo1	4.6377e-10	0.136992	0.36	0.244	8.21661e-06
Otub1	2.11257e-06	0.136985	0.575	0.47	0.036818
Mpc2	6.40141e-12	0.136028	0.354	0.225	1.13734e-07
Bhlhe41	2.36325e-07	0.134835	0.268	0.186	0.0041508
Snhg12	4.38968e-10	0.133988	0.585	0.45	7.77763e-06
mt-Nd4	1.85864e-18	0.133758	1	1	3.3147e-14
Nudc	2.02297e-09	0.132699	0.617	0.486	3.57884e-05
Hmgcs1	6.81075e-11	0.132083	0.548	0.404	1.20877e-06
Fhad1	2.11798e-13	0.131532	0.22	0.113	3.76937e-09
Rpl3	2.26565e-13	0.131104	0.965	0.939	4.03195e-09
Srebf2	9.22454e-13	0.130518	0.506	0.346	1.64068e-08
Thy1	6.45396e-08	0.129925	0.759	0.623	0.00113628
Rpl6	2.29558e-13	0.129717	0.96	0.942	4.08498e-09
Vps50	1.29865e-10	0.129472	0.398	0.269	2.30381e-06
Ldlr	4.96971e-12	0.129431	0.143	0.064	8.83069e-08
Endod1	6.0446e-09	0.12884	0.431	0.311	0.000106826
Tfrc	6.7988e-12	0.127766	0.246	0.14	1.20787e-07
Sez6l	2.1559e-08	0.127554	0.696	0.574	0.000380366
Lrp11	5.56711e-09	0.127059	0.415	0.294	9.83987e-05
Ngb	8.36885e-12	0.12661	0.412	0.27	1.48656e-07
Eif3i	9.67269e-11	0.126103	0.482	0.345	1.71613e-06
Kcnip4	6.06746e-08	0.125965	0.323	0.223	0.00106836
Ola1	1.60657e-11	0.125171	0.405	0.269	2.85294e-07
Gabrg2	7.80992e-08	0.125074	0.618	0.489	0.00137439
Mcfd2	8.39221e-10	0.124862	0.432	0.302	1.48626e-05
Eif3m	5.10302e-10	0.124662	0.533	0.394	9.03999e-06
Eif3e	2.18435e-07	0.124436	0.654	0.544	0.00383768
Rps18	3.92301e-11	0.123281	0.918	0.924	6.96413e-07
Rnf112	1.64547e-09	0.123266	0.494	0.356	2.91198e-05
Srsf5	8.80098e-10	0.123218	0.794	0.672	1.55857e-05
Rps26	1.83373e-09	0.122993	0.912	0.89	3.2446e-05
Atp5g2	2.4843e-09	0.122523	0.669	0.542	4.39423e-05
Rabgap1	2.11354e-10	0.121993	0.472	0.335	3.74816e-06
Cntnap4	6.88979e-08	0.12114	0.28	0.189	0.00121288
Psmb1	1.0291e-07	0.120005	0.672	0.568	0.00181061
Nat8l	1.07644e-06	0.119742	0.491	0.38	0.0188172
Kifc2	1.11235e-09	0.119731	0.364	0.247	1.96931e-05
Tspan7	1.27453e-09	0.119012	0.925	0.84	2.25605e-05
Bex1	1.89125e-08	0.118903	0.733	0.631	0.000333712
Itm2c	5.54671e-09	0.118607	0.955	0.911	9.80437e-05
Dock10	9.17214e-07	0.11833	0.149	0.089	0.0160393
Hnrnpdl	3.00428e-08	0.118327	0.585	0.468	0.000529925
Lnpk	2.79952e-08	0.117613	0.47	0.339	0.000493863
Kdelr2	9.50817e-11	0.117402	0.3	0.189	1.68713e-06
Rps9	8.36086e-09	0.117332	0.887	0.876	0.000147711
Yme1l1	3.10866e-12	0.11703	0.537	0.377	5.52657e-08
Cd83	1.59694e-07	0.116983	0.304	0.211	0.00280758
Dpp10	5.365e-08	0.116936	0.525	0.399	0.00094499
Atp2b4	3.27143e-08	0.11632	0.323	0.223	0.00057695
Id2	1.26334e-06	0.11621	0.161	0.098	0.0220718
Astn1	3.11136e-10	0.115194	0.764	0.624	5.5155e-06
Man2a2	2.28279e-10	0.115016	0.438	0.304	4.04762e-06
Epb41l4aos	8.79996e-11	0.114249	0.267	0.159	1.56164e-06
Tmem161b	4.06202e-10	0.114141	0.136	0.064	7.19831e-06
Atp5h	2.4589e-07	0.114081	0.743	0.649	0.00431831
Stx4a	9.33022e-10	0.114004	0.395	0.271	1.65201e-05
Bex4	1.54931e-08	0.112897	0.477	0.354	0.000273499
Hmgcr	5.0911e-08	0.112392	0.397	0.282	0.000896899
Pdzrn4	1.91317e-11	0.112191	0.326	0.204	3.39722e-07
Matk	4.26201e-08	0.112085	0.601	0.467	0.000751179
Fut9	1.04437e-06	0.110734	0.516	0.405	0.0182587
Pnisr	1.19951e-06	0.110483	0.861	0.748	0.0209614
Ncl	1.22104e-07	0.109435	0.662	0.532	0.00214756
Fgf12	1.30235e-08	0.108924	0.323	0.219	0.00022993
Actr1b	1.07378e-06	0.108816	0.531	0.421	0.0187718
Arsb	5.90761e-10	0.108662	0.341	0.223	1.04647e-05
Izumo4	6.28869e-10	0.107178	0.322	0.208	1.11392e-05
Il13ra1	1.32634e-13	0.107032	0.198	0.095	2.36075e-09
Aff4	1.87126e-06	0.106902	0.71	0.601	0.0326254
Cct5	2.52853e-07	0.106846	0.508	0.39	0.00443984
Idi1	9.73781e-10	0.106097	0.19	0.105	1.72408e-05
Sugt1	1.26512e-08	0.105889	0.368	0.259	0.000223369
Hint1	6.51094e-08	0.105743	0.834	0.768	0.00114625
Itih3	6.66425e-14	0.105467	0.13	0.048	1.1863e-09
Zfp622	5.12878e-09	0.104556	0.39	0.271	9.06615e-05
Meg3	1.33735e-16	0.104329	0.998	0.999	2.38369e-12
Ctsb	5.74337e-07	0.104174	0.741	0.617	0.0100601
Pcyox1	4.14647e-09	0.103815	0.481	0.341	7.33179e-05
Eif2a	2.24023e-07	0.103779	0.336	0.233	0.00393563
Cox4i1	4.06773e-08	0.103649	0.929	0.906	0.000716978
Snrpe	1.10518e-07	0.103042	0.492	0.37	0.00194413
Spag9	1.31238e-07	0.102777	0.71	0.585	0.00230769
Selenof	8.34321e-07	0.102752	0.573	0.459	0.0145948
Pcdh9	2.65165e-07	0.102047	0.578	0.456	0.00465523
Bsn	2.73491e-06	0.101906	0.314	0.229	0.0476011
Resp18	1.31598e-08	0.101752	0.72	0.582	0.000232322
Grk3	5.29713e-08	0.101443	0.287	0.192	0.000933089
Tmem237	1.85863e-09	0.101416	0.262	0.161	3.28848e-05
Slf1	2.32836e-10	0.100797	0.292	0.178	4.12818e-06
Ssbp4	3.73494e-08	0.10062	0.564	0.431	0.000658433
Supt16	2.34233e-07	0.099478	0.262	0.175	0.0041143
Polr1d	2.73909e-06	0.0979461	0.609	0.504	0.0476712
Ndufa4	7.6025e-08	0.097803	0.749	0.642	0.00133819
Mpp5	1.23177e-08	0.0976472	0.266	0.172	0.000217494
Snrpf	1.11137e-08	0.0975616	0.666	0.532	0.000196301
Stx16	9.74141e-09	0.0969519	0.622	0.47	0.000172072
Slitrk3	4.00192e-10	0.0964458	0.162	0.083	7.0922e-06
Enpp2	8.92682e-07	0.0960256	0.164	0.099	0.0156112
Gm26724	6.52564e-09	0.095407	0.211	0.124	0.000115315
Acsl4	4.38089e-07	0.0949608	0.327	0.232	0.00768102
Rps6	4.38551e-08	0.0948983	0.927	0.909	0.000772815
Serpini1	5.99513e-09	0.0947347	0.403	0.28	0.000105958
Ldhb	7.88892e-09	0.0941076	0.354	0.237	0.000139389
Socs2	1.36906e-09	0.0933546	0.205	0.116	2.4231e-05
Cops2	5.81436e-07	0.0932136	0.483	0.362	0.0101838
Bsdc1	4.30354e-09	0.0931821	0.322	0.212	7.60822e-05
Tsr2	7.57023e-07	0.0931069	0.427	0.321	0.0132494
Eif4b	8.45984e-07	0.0926514	0.572	0.454	0.0147971
Commd8	1.2227e-08	0.09243	0.333	0.219	0.000215905
Smim26	2.24245e-07	0.0923416	0.55	0.428	0.00393931
Plxnc1	1.14391e-07	0.0922931	0.411	0.298	0.00201203
4430402I18Rik	8.65241e-07	0.0922065	0.299	0.209	0.0151322
Zfp942	3.07652e-08	0.0916667	0.163	0.092	0.000542606
Kmt2a	8.5517e-07	0.0916621	0.566	0.44	0.0149569
Wsb1	3.66317e-07	0.0914158	0.492	0.373	0.0064263
Ncs1	2.08271e-07	0.0913665	0.569	0.443	0.00365932
Phkb	4.93997e-08	0.0904075	0.159	0.089	0.000870325
Txndc9	6.32051e-08	0.0904046	0.306	0.206	0.00111285
Kdsr	7.7186e-07	0.0903999	0.392	0.286	0.0135083
Nrxn3	1.78048e-08	0.0903868	0.982	0.956	0.000314255
Tmem184c	1.80431e-09	0.0901902	0.26	0.159	3.19292e-05
Sema6b	2.7887e-09	0.0894884	0.392	0.27	4.93237e-05
Slc38a2	2.03967e-07	0.088683	0.522	0.4	0.00358391
Cpeb1	4.58778e-08	0.0886098	0.218	0.135	0.000808368
Idh1	9.57077e-11	0.0885951	0.232	0.131	1.69814e-06
Ly6e	1.96457e-07	0.0881907	0.522	0.398	0.00345253
Paics	1.60424e-06	0.0880196	0.285	0.198	0.0279924
Hook2	6.00613e-07	0.0880165	0.254	0.171	0.0105185
Abcb7	1.37742e-06	0.0878044	0.182	0.116	0.0240512
Hook1	5.25245e-08	0.0877431	0.437	0.318	0.000925272
Slc39a11	2.49517e-07	0.0870804	0.119	0.064	0.00438152
Adam15	5.65828e-08	0.0863888	0.24	0.155	0.000996479
Arpc3	1.88372e-08	0.0858699	0.365	0.253	0.0003324
Gpr26	3.56995e-08	0.0857703	0.126	0.064	0.000629453
Trmt13	7.46361e-08	0.0851506	0.188	0.113	0.00131382
Megf9	2.41792e-06	0.0849737	0.317	0.228	0.0421177
Scap	1.38494e-06	0.0846825	0.201	0.132	0.024181
Cct2	4.53988e-07	0.0845793	0.539	0.416	0.00795886
Sorl1	3.39619e-07	0.0845163	0.344	0.245	0.0059593
Gcsh	1.55346e-06	0.0844346	0.305	0.216	0.0271125
Zfp467	1.68207e-06	0.0841732	0.234	0.156	0.0293437
Ptprk	2.77874e-06	0.0840226	0.283	0.202	0.0483529
Plekha6	1.78426e-07	0.083271	0.323	0.222	0.00313637
Mical2	5.41242e-07	0.0829941	0.161	0.094	0.00948364
Hsp90ab1	1.3129e-06	0.0827011	0.929	0.918	0.022935
Unc5a	1.19881e-06	0.0822128	0.244	0.165	0.0209505
Zfp281	1.58109e-06	0.0820442	0.263	0.18	0.0275916
Zfp263	9.47425e-08	0.0816275	0.161	0.092	0.00166709
Dlx6	1.31383e-06	0.081602	0.218	0.143	0.02295
Aimp1	6.52795e-07	0.0807888	0.494	0.369	0.0114304
Arsa	4.75476e-08	0.0807635	0.154	0.085	0.000837742
Dlg1	5.59996e-07	0.0803311	0.328	0.23	0.00981001
Cnih1	3.35314e-09	0.0799058	0.488	0.356	5.93036e-05
Plvap	1.12629e-08	0.079787	0.247	0.157	0.000198902
C2cd5	5.91158e-08	0.079403	0.431	0.307	0.00104103
Cyb5r3	2.19552e-06	0.079265	0.37	0.269	0.0382613
Ece1	2.95593e-07	0.0790856	0.276	0.187	0.00518854
Atp1a2	1.29352e-07	0.0788736	0.217	0.135	0.00227465
Rab26	1.40202e-06	0.0788414	0.212	0.14	0.024475
Emc2	1.19291e-09	0.0785517	0.242	0.143	2.11169e-05
Trim28	4.35774e-07	0.0785221	0.219	0.142	0.00764086
Rbm4b	4.62269e-07	0.0784561	0.719	0.587	0.00810357
Atp13a3	9.51829e-08	0.0784321	0.262	0.173	0.00167474
Slc39a1	2.59266e-06	0.0782445	0.112	0.061	0.0451459
Carmil1	9.18267e-07	0.0779902	0.13	0.074	0.0160568
Rc3h2	2.30817e-06	0.0779648	0.484	0.364	0.0402176
Qsox1	5.10422e-07	0.0779201	0.185	0.116	0.00894515
Bcl2l2	1.04915e-07	0.0779032	0.326	0.225	0.00184567
Gm42851	1.32959e-06	0.0774521	0.193	0.124	0.0232212
Jam3	1.24109e-07	0.0773723	0.296	0.2	0.00218271
Braf	6.3289e-07	0.0773655	0.38	0.278	0.0110832
Lrrtm2	4.25817e-09	0.0767407	0.344	0.229	7.52845e-05
Psmd12	1.32895e-06	0.0764751	0.399	0.291	0.0232114
Mfn1	4.23104e-07	0.0764282	0.248	0.165	0.00741955
Ccpg1	4.05899e-07	0.0754265	0.238	0.157	0.00711906
Snrpb2	2.87978e-07	0.0753262	0.359	0.252	0.00505517
Guf1	1.31422e-06	0.0749306	0.366	0.266	0.0229556
Ddr1	4.3387e-07	0.0748788	0.128	0.07	0.0076079
Prdx6	1.34504e-06	0.0747455	0.281	0.191	0.0234897
2021-03-07	3.63602e-07	0.0747443	0.445	0.331	0.00637904
Luzp2	3.70714e-08	0.0745526	0.297	0.198	0.000653569
Mib1	2.58909e-07	0.0741606	0.348	0.244	0.00454592
Mtg1	6.54045e-07	0.0736512	0.124	0.067	0.0114517
Trrap	2.73067e-06	0.0731521	0.349	0.25	0.0475301
Pafah1b3	4.51622e-08	0.072536	0.276	0.178	0.000795804
Ggct	1.80097e-07	0.072355	0.158	0.091	0.00316556
Ppp1r16a	5.39529e-07	0.0720343	0.204	0.13	0.00945417
Lman2l	2.58373e-06	0.0715729	0.444	0.335	0.0449957
Kif17	1.47651e-06	0.0712081	0.133	0.076	0.0257726
Zfp120	1.62921e-06	0.0706669	0.17	0.105	0.0284264
Myadm	3.04485e-07	0.0705699	0.201	0.127	0.00534371
Lcmt1	1.19739e-06	0.070569	0.357	0.257	0.0209268
Sbf2	1.53103e-07	0.070542	0.333	0.228	0.00269185
Rab9	1.84602e-08	0.0698815	0.203	0.12	0.000325785
Carf	2.69159e-06	0.0698157	0.245	0.166	0.0468525
Rab1b	8.09897e-07	0.0690092	0.384	0.274	0.0141708
Gstm1	4.07928e-07	0.0688605	0.234	0.151	0.00715425
Fbxl4	2.67817e-06	0.0684859	0.108	0.059	0.0466217
Per3	3.91273e-07	0.0680964	0.311	0.216	0.00686332
D3Ertd254e	7.69321e-08	0.0680941	0.188	0.112	0.001354
Tctex1d2	5.54178e-07	0.0677952	0.134	0.075	0.00970921
Ppm1m	1.78386e-06	0.0673984	0.132	0.075	0.0311106
Trmt1	7.84555e-07	0.0662565	0.267	0.182	0.0137289
Klf9	4.83312e-07	0.0661052	0.349	0.245	0.00847101
Mbd6	2.63515e-06	0.066039	0.182	0.114	0.0458833
Yod1	2.66227e-06	0.0658238	0.191	0.123	0.0463529
Prkaa1	1.37312e-06	0.0655881	0.179	0.113	0.0239775
Naaa	1.98709e-07	0.065272	0.179	0.106	0.00349172
Zfp667	9.69681e-07	0.0652424	0.226	0.147	0.0169549
Rcn1	1.79522e-06	0.0652015	0.243	0.162	0.0313033
Pias1	1.99284e-06	0.0650486	0.299	0.207	0.0347371
Eml5	4.34374e-08	0.0644803	0.355	0.244	0.000765541
Tfcp2	2.47588e-07	0.0643656	0.202	0.124	0.0043479
Stk38	2.64924e-07	0.0642438	0.262	0.172	0.00465127
Ube2l3	1.69573e-06	0.0640596	0.583	0.451	0.0295787
Taf1	2.77081e-06	0.063458	0.364	0.261	0.0482177
Dnajc16	7.24908e-07	0.0633734	0.275	0.187	0.0126895
Fdps	1.14252e-06	0.0630469	0.155	0.093	0.0199689
Brdt	2.46564e-06	0.0625421	0.145	0.086	0.042944
Etv3	2.38916e-06	0.0625004	0.198	0.128	0.0416191
Spr	5.67946e-07	0.0621108	0.162	0.096	0.00994872
Ddx46	2.80313e-07	0.0617837	0.299	0.202	0.0049209
Ccdc39	3.7728e-08	0.06156	0.162	0.09	0.000665069
Elk1	2.5912e-06	0.061029	0.164	0.102	0.0451231
Rab8b	8.35445e-07	0.0606871	0.253	0.168	0.0146136
Rab23	1.57222e-06	0.0602196	0.179	0.111	0.0274384
Cdk10	1.89672e-06	0.0599398	0.224	0.146	0.0330674
Psme2	4.35256e-08	0.0596662	0.273	0.173	0.000767051
Slc30a5	7.78145e-08	0.0594867	0.203	0.124	0.00136946
Smyd5	1.72722e-07	0.0587211	0.258	0.167	0.00303627
Tob1	1.69901e-08	0.0585679	0.257	0.162	0.000299891
Arhgef11	1.28532e-07	0.0585303	0.107	0.053	0.00226036
Ndufs1	1.39278e-06	0.0576605	0.272	0.185	0.0243152
Eif3d	8.28922e-07	0.057311	0.235	0.154	0.0145012
Dnajb12	2.25673e-07	0.0570078	0.148	0.084	0.00396418
Cul9	2.57682e-06	0.0568115	0.267	0.183	0.0448778
Uhrf1bp1l	1.53156e-06	0.0562433	0.305	0.211	0.0267319
Gramd1a	3.66159e-08	0.0559304	0.385	0.268	0.000645575
Chuk	1.96585e-07	0.0549381	0.34	0.236	0.00345458
Pigx	6.45359e-07	0.0546966	0.154	0.091	0.0113009
Rrn3	8.17833e-07	0.054673	0.346	0.244	0.0143088
Rnf13	2.74309e-06	0.0544609	0.296	0.206	0.047738
Calcoco1	1.91732e-06	0.0542334	0.18	0.112	0.0334247
Thyn1	1.35828e-06	0.0540583	0.223	0.144	0.0237196
Cep70	1.12872e-06	0.0535307	0.133	0.075	0.0197289
Dbn1	9.85644e-07	0.053259	0.409	0.296	0.017233
Rps6kb2	3.56823e-07	0.0531708	0.19	0.117	0.00626081
Polr3k	2.2178e-06	0.0524678	0.304	0.212	0.0386475
Mrps18c	8.02306e-07	0.0513722	0.277	0.184	0.0140387
Plgrkt	1.63053e-06	0.0508822	0.146	0.086	0.0284479
Rgs11	1.70068e-07	0.0507279	0.153	0.087	0.00298979
Zfp68	1.66758e-06	0.0503844	0.18	0.111	0.0290927
Syf2	4.71825e-07	0.0482059	0.301	0.201	0.00827014
Asl	1.03711e-07	0.0481281	0.124	0.064	0.00182458
Rdh11	7.71891e-07	0.0460785	0.101	0.05	0.0135081
P3h4	1.70951e-06	0.0460662	0.141	0.083	0.0298172
Polr1c	1.79324e-06	0.0458508	0.279	0.187	0.0312705
Tmem192	1.20273e-06	0.0452294	0.274	0.183	0.0210164
Hsd17b10	2.11249e-06	0.0431345	0.17	0.104	0.0368186
Zfp740	1.69071e-06	0.0401123	0.277	0.187	0.0294928
Anxa7	2.4386e-06	0.039107	0.26	0.176	0.0424756
Rpl36a-ps1	2.31628e-06	0.0321813	0.163	0.098	0.0403542

## Sheet: Vgat_Female_P35FvsP50F
	p_val	avg_logFC	pct.1	pct.2	p_val_adjust
Gm10076	4.68149e-59	0.45711	0.655	0.405	8.37752e-55
Rgs2	1.79129e-17	0.263928	0.345	0.21	3.19746e-13
Vamp2	2.29689e-26	0.254606	0.86	0.722	4.10891e-22
Selenow	6.89325e-31	0.244787	0.929	0.843	1.23334e-26
Pgr15l	8.40879e-13	0.239881	0.293	0.176	1.4955e-08
Nap1l5	7.42706e-27	0.239156	0.974	0.946	1.3287e-22
Ppp3r1	6.71208e-21	0.23648	0.793	0.653	1.19951e-16
Eno2	1.06892e-19	0.235691	0.785	0.659	1.90963e-15
Rps16	1.09592e-23	0.233718	0.926	0.853	1.95984e-19
Rpl15	7.11775e-23	0.233686	0.896	0.811	1.27273e-18
Vsnl1	5.6447e-14	0.231921	0.606	0.473	1.00527e-09
Rps14	7.26181e-25	0.229076	0.968	0.908	1.29885e-20
Gabarapl1	1.07094e-24	0.228941	0.899	0.802	1.91538e-20
Prkar1b	4.37916e-20	0.22519	0.834	0.705	7.82424e-16
Npm1	2.33724e-16	0.224993	0.86	0.746	4.16917e-12
Zcchc12	5.48105e-14	0.224556	0.806	0.685	9.76175e-10
Syn1	1.79448e-16	0.224006	0.599	0.464	3.20208e-12
Rpl11	2.50909e-25	0.221654	0.957	0.884	4.48802e-21
Nr2f2	1.04496e-09	0.220696	0.355	0.25	1.84801e-05
Clip3	2.64918e-19	0.21996	0.753	0.609	4.73196e-15
Rpl36	4.93527e-22	0.215707	0.932	0.848	8.82278e-18
Uqcrh	3.9884e-21	0.214864	0.893	0.802	7.12887e-17
Atp6v1a	1.30609e-17	0.214071	0.836	0.696	2.33164e-13
Rgs10	1.72755e-12	0.213702	0.621	0.492	3.07055e-08
Tpi1	5.74592e-16	0.212876	0.672	0.543	1.02461e-11
Clta	5.43397e-17	0.212275	0.721	0.585	9.69746e-13
Rpl32	2.3516e-23	0.211596	0.954	0.894	4.20512e-19
Lypd1	3.51792e-10	0.210153	0.353	0.242	6.22813e-06
Eif3f	1.10062e-17	0.209721	0.777	0.643	1.96494e-13
Slc25a4	7.38937e-19	0.208718	0.878	0.766	1.31974e-14
Tmsb10	6.81615e-21	0.20545	0.949	0.875	1.21805e-16
Rpl35	1.77991e-19	0.204979	0.882	0.79	3.17946e-15
Rps15a	5.35273e-18	0.204557	0.909	0.839	9.55783e-14
Tpt1	1.97541e-14	0.204471	0.858	0.756	3.51899e-10
Atp6v1b2	1.38429e-15	0.203593	0.789	0.665	2.46763e-11
Rpl29	4.73271e-18	0.203421	0.884	0.794	8.45119e-14
Cox4i1	8.15717e-23	0.20336	0.929	0.862	1.4585e-18
Syn2	1.46328e-13	0.202934	0.725	0.614	2.60507e-09
Cox7c	2.70154e-21	0.202921	0.921	0.844	4.829e-17
Chn1	1.45149e-14	0.201386	0.542	0.411	2.58611e-10
Rps13	3.00304e-20	0.201305	0.923	0.846	5.36583e-16
Rpl37a	4.62282e-21	0.200035	0.957	0.919	8.26237e-17
Ywhag	8.66536e-21	0.19928	0.902	0.801	1.54841e-16
Cbx6	2.12342e-16	0.198378	0.723	0.591	3.78839e-12
Eef1b2	1.46691e-14	0.198206	0.776	0.663	2.61344e-10
Nrgn	3.91471e-08	0.19812	0.236	0.156	0.000689537
Rpl23	6.13923e-21	0.198079	0.957	0.904	1.0972e-16
Basp1	5.56792e-15	0.197305	0.84	0.703	9.92371e-11
Ndufa6	9.58563e-16	0.196167	0.797	0.691	1.70893e-11
mt-Nd4l	6.74765e-13	0.194879	0.795	0.688	1.2002e-08
Rpl7	8.73981e-16	0.194514	0.905	0.822	1.55831e-11
Plp1	6.67368e-22	0.194352	0.623	0.449	1.19299e-17
Rps19	3.97963e-19	0.193945	0.958	0.9	7.10801e-15
Rps10	2.1292e-16	0.193151	0.912	0.827	3.7985e-12
Hsp90ab1	6.34207e-18	0.192987	0.929	0.839	1.13238e-13
Rps17	1.61547e-17	0.191523	0.908	0.848	2.88378e-13
Wdr6	3.47056e-13	0.191483	0.783	0.668	6.17482e-09
Rps29	6.31093e-26	0.190908	0.986	0.969	1.1289e-21
Rps21	1.09097e-19	0.188848	0.944	0.888	1.94892e-15
Tubb4a	1.6617e-12	0.188553	0.674	0.552	2.95366e-08
Rplp1	4.30761e-24	0.188544	0.98	0.944	7.70373e-20
Atp5g2	1.22662e-14	0.187912	0.669	0.536	2.18559e-10
Tubb3	1.03759e-12	0.187821	0.555	0.443	1.84515e-08
Eif4a2	2.24291e-16	0.187427	0.929	0.861	4.00113e-12
Rps18	5.42923e-17	0.186931	0.918	0.866	9.68955e-13
Stx1b	3.29875e-13	0.186602	0.621	0.497	5.8698e-09
Ndn	1.83085e-08	0.186246	0.539	0.435	0.000322723
Rps27	6.50464e-20	0.185769	0.978	0.96	1.16212e-15
Rps27a	7.3253e-18	0.184732	0.963	0.919	1.30786e-13
Rps3	1.89553e-16	0.1847	0.932	0.867	3.3822e-12
Atp5a1	7.84194e-14	0.184475	0.741	0.606	1.39649e-09
Snap47	3.76853e-13	0.184207	0.64	0.514	6.70458e-09
Ccnb1ip1	1.01039e-06	0.18415	0.319	0.24	0.0176565
Ywhab	8.30866e-15	0.184005	0.872	0.761	1.48077e-10
Rpl18	2.50936e-13	0.183695	0.86	0.767	4.46616e-09
Rplp2	3.31697e-16	0.183643	0.95	0.882	5.91582e-12
Dcaf7	1.2441e-12	0.18315	0.656	0.529	2.21213e-08
Serp2	4.29694e-14	0.183083	0.826	0.708	7.65328e-10
Rps20	1.065e-15	0.182578	0.902	0.829	1.89857e-11
Zwint	2.30817e-17	0.182062	0.909	0.826	4.11985e-13
Rps7	2.00469e-16	0.181966	0.927	0.865	3.57677e-12
Syp	9.07686e-16	0.181755	0.914	0.831	1.61831e-11
Gpx3	6.43771e-11	0.181225	0.593	0.48	1.14173e-06
Pkm	6.05866e-13	0.180872	0.782	0.676	1.07771e-08
Gda	1.99289e-06	0.179404	0.471	0.386	0.0347679
Pfdn5	1.80129e-12	0.179324	0.875	0.785	3.20126e-08
Usp11	2.16099e-13	0.179292	0.612	0.485	3.84657e-09
Btf3	1.56809e-11	0.179287	0.683	0.584	2.78414e-07
Fau	3.09189e-22	0.17892	0.973	0.931	5.52768e-18
Ap2m1	3.41012e-13	0.177682	0.693	0.584	6.06762e-09
Sqstm1	4.4767e-12	0.17739	0.602	0.484	7.9533e-08
Ptms	1.77594e-12	0.176668	0.726	0.628	3.15638e-08
Rps3a1	5.88764e-13	0.175686	0.917	0.833	1.04735e-08
Gng2	2.01716e-12	0.17518	0.765	0.645	3.5847e-08
Prkaca	1.49777e-12	0.175121	0.705	0.579	2.66259e-08
Tppp	7.17741e-12	0.174923	0.617	0.502	1.27478e-07
Rpl12	9.92583e-12	0.174867	0.877	0.792	1.76263e-07
Cox7a2l	8.48096e-15	0.174536	0.872	0.766	1.51139e-10
Eid1	3.27868e-12	0.172886	0.776	0.63	5.82556e-08
Actg1	9.45975e-15	0.172274	0.892	0.795	1.68573e-10
Tmsb4x	3.89071e-11	0.17179	0.976	0.943	6.90368e-07
Ndrg4	7.18454e-11	0.17135	0.885	0.795	1.27403e-06
Gapdh	2.55994e-14	0.171221	0.638	0.487	4.56001e-10
Rpl22	6.69327e-11	0.170982	0.746	0.646	1.18698e-06
Mapk1	2.70423e-12	0.170918	0.747	0.618	4.80542e-08
Aip	5.46117e-12	0.170329	0.464	0.348	9.70123e-08
2900011O08Rik	1.30382e-11	0.168326	0.601	0.481	2.31507e-07
Tuba4a	7.4895e-12	0.168302	0.504	0.385	1.33014e-07
Marcks	1.67362e-10	0.168107	0.795	0.679	2.96616e-06
Rps26	9.61942e-13	0.167754	0.912	0.832	1.71072e-08
Rab3a	3.08499e-11	0.167203	0.786	0.681	5.47492e-07
Calm3	1.24732e-12	0.167187	0.855	0.745	2.21773e-08
Thra	6.90354e-13	0.166523	0.821	0.709	1.22786e-08
Rpl7a	1.37871e-10	0.166481	0.848	0.757	2.44403e-06
Rps24	2.36829e-16	0.165681	0.944	0.903	4.22431e-12
Cltc	5.31701e-12	0.164846	0.817	0.7	9.44567e-08
Rps5	5.99737e-16	0.164471	0.961	0.903	1.06939e-11
Gad1	1.59122e-10	0.164386	0.763	0.645	2.82028e-06
Rpl34	1.21774e-13	0.162709	0.923	0.863	2.1683e-09
Rps28	1.82066e-13	0.162213	0.939	0.886	3.24114e-09
Rpl17	1.76951e-18	0.162186	0.982	0.954	3.16017e-14
Eif3e	5.12433e-09	0.162102	0.654	0.555	9.04854e-05
Rps4x	1.27618e-12	0.161834	0.941	0.892	2.26892e-08
Eif3k	1.72532e-10	0.161645	0.706	0.611	3.0576e-06
Rab1a	9.42657e-12	0.159346	0.701	0.574	1.67407e-07
Naca	1.87484e-10	0.159291	0.862	0.766	3.32184e-06
Rpl35a	1.39037e-13	0.15871	0.951	0.906	2.47541e-09
Rpl9	2.5963e-14	0.157768	0.957	0.905	4.62452e-10
Cbarp	1.9171e-14	0.157576	0.947	0.881	3.41532e-10
Aldoa	3.07683e-13	0.157574	0.744	0.629	5.47552e-09
Atp6v1g2	4.92412e-09	0.157476	0.703	0.604	8.69599e-05
Rpl27a	7.8812e-17	0.157387	0.968	0.945	1.4064e-12
Stmn2	3.27344e-13	0.157344	0.913	0.858	5.82509e-09
Rps23	2.48067e-13	0.157275	0.963	0.939	4.41535e-09
Pgam1	5.60801e-11	0.157271	0.725	0.622	9.94749e-07
Ywhaq	1.48175e-10	0.156473	0.79	0.667	2.6264e-06
Pnmal2	1.84076e-10	0.156369	0.873	0.749	3.26164e-06
Vat1l	1.11242e-08	0.155342	0.648	0.541	0.000196197
Aldoc	1.21733e-10	0.154597	0.305	0.202	2.15808e-06
Rpl38	1.59545e-15	0.154485	0.971	0.917	2.84389e-11
Herc3	1.91197e-08	0.154405	0.51	0.409	0.000336984
Arhgdia	4.75774e-09	0.153832	0.584	0.487	8.40265e-05
Hpcal4	8.53862e-09	0.153559	0.549	0.446	0.000150664
Snca	3.16294e-07	0.153544	0.337	0.254	0.00554685
Ncdn	1.20552e-09	0.153155	0.647	0.532	2.13161e-05
Nsf	3.36159e-10	0.152966	0.814	0.705	5.9517e-06
Rpl18a	1.03545e-14	0.152952	0.96	0.908	1.84507e-10
B630019K06Rik	2.63688e-10	0.152336	0.633	0.505	4.66992e-06
Uba52	1.16361e-12	0.152324	0.457	0.332	2.06914e-08
Rps15	2.5805e-17	0.152151	0.975	0.924	4.60567e-13
Peg3	4.47171e-13	0.15212	0.937	0.856	7.95518e-09
Stxbp1	3.29241e-10	0.151956	0.842	0.736	5.82954e-06
Rpl6	2.06591e-13	0.151244	0.96	0.916	3.67752e-09
Rpl30	1.99677e-11	0.149948	0.911	0.835	3.54466e-07
Rps9	9.71826e-11	0.149658	0.887	0.823	1.72324e-06
Ywhaz	9.85688e-10	0.149513	0.845	0.708	1.74358e-05
Got1	8.46138e-10	0.149059	0.494	0.388	1.49699e-05
D430019H16Rik	1.36678e-08	0.148977	0.416	0.319	0.00024099
Rpl28	4.35699e-11	0.148639	0.898	0.817	7.73018e-07
Kif3c	2.40136e-11	0.147609	0.467	0.345	4.26265e-07
Rpl21	1.26189e-13	0.1475	0.972	0.942	2.2468e-09
Diras1	5.28217e-11	0.147484	0.298	0.192	9.37058e-07
Dynll2	3.42272e-11	0.147464	0.905	0.8	6.07395e-07
Wbp2	1.5959e-09	0.146977	0.655	0.552	2.82122e-05
Rpl31	1.75235e-15	0.146878	0.963	0.918	3.12339e-11
Gap43	9.41692e-10	0.146272	0.894	0.803	1.66585e-05
Hdac11	9.84327e-11	0.146148	0.729	0.623	1.74531e-06
Mtch1	1.79121e-11	0.146076	0.824	0.719	3.18011e-07
Rpl19	3.01456e-13	0.145954	0.957	0.905	5.36501e-09
Ucp2	2.56726e-09	0.145441	0.167	0.092	4.53609e-05
Ctxn1	5.73532e-07	0.14534	0.672	0.582	0.0100408
Pak1	6.30488e-10	0.145305	0.644	0.52	1.11577e-05
Rab7	2.06481e-09	0.145194	0.608	0.494	3.64873e-05
Pfdn2	1.14675e-09	0.145039	0.847	0.749	2.02779e-05
Mrpl30	1.31132e-09	0.144503	0.563	0.461	2.31841e-05
Eef1a1	5.44661e-11	0.144427	0.977	0.939	9.66174e-07
Lonrf2	4.4439e-10	0.143966	0.759	0.622	7.86614e-06
AW551984	3.68879e-07	0.1437	0.664	0.571	0.00646607
BC029722	2.99377e-11	0.143173	0.691	0.568	5.31334e-07
Rps11	1.16168e-11	0.143137	0.95	0.891	2.06279e-07
Rnf187	4.4843e-11	0.142953	0.731	0.605	7.9556e-07
Rpl22l1	3.90778e-12	0.142904	0.963	0.918	6.94295e-08
Rpl24	8.9136e-14	0.14267	0.969	0.927	1.58724e-09
Rcan2	1.06536e-07	0.14217	0.597	0.494	0.00187344
Napb	5.70077e-11	0.14203	0.804	0.685	1.01115e-06
Rpl26	2.54556e-11	0.141752	0.96	0.917	4.51837e-07
Ppfia4	1.30496e-08	0.141407	0.313	0.221	0.000230103
Tcf25	5.76926e-11	0.141089	0.818	0.699	1.02324e-06
Slc25a12	1.41004e-08	0.140732	0.416	0.318	0.000248604
Klc1	2.8798e-10	0.14047	0.724	0.609	5.09985e-06
Acot7	4.74498e-08	0.140342	0.458	0.369	0.000835449
Habp4	7.21684e-10	0.140221	0.553	0.432	1.27702e-05
Rps12	2.48293e-10	0.140194	0.887	0.826	4.39752e-06
Ankrd46	6.88656e-09	0.140163	0.452	0.356	0.000121555
Ctxn2	3.1845e-07	0.139557	0.609	0.517	0.00558433
Rnf220	8.77243e-08	0.13949	0.568	0.473	0.00154307
Rtl8b	5.33407e-09	0.13941	0.665	0.566	9.41784e-05
Fbxl16	2.4568e-10	0.139066	0.548	0.423	4.35148e-06
Tsc22d1	1.73292e-09	0.138849	0.769	0.688	3.06277e-05
2900097C17Rik	1.39922e-10	0.13875	0.918	0.822	2.48025e-06
Map1lc3b	5.15837e-09	0.138629	0.465	0.363	9.10813e-05
Calm1	2.2557e-10	0.13803	0.908	0.794	3.99597e-06
Chp1	2.04582e-07	0.137835	0.558	0.464	0.00359307
Camk2n1	4.39076e-08	0.13738	0.593	0.486	0.000773213
Ndufa8	3.61528e-09	0.136964	0.563	0.45	6.38639e-05
Pkia	2.59056e-08	0.136819	0.611	0.51	0.000456483
Apbb1	7.5299e-10	0.136809	0.553	0.446	1.33234e-05
Rab11fip4	1.92019e-11	0.136769	0.484	0.363	3.40891e-07
Psmb1	3.59622e-08	0.136616	0.672	0.586	0.000633546
Rgs17	7.21239e-08	0.136219	0.716	0.623	0.00126931
Rpl10a	1.64728e-09	0.1359	0.907	0.841	2.91173e-05
Gnao1	5.02879e-09	0.135284	0.834	0.73	8.88034e-05
Rab6b	7.07299e-08	0.135037	0.705	0.609	0.00124492
Hint1	9.50239e-09	0.134848	0.834	0.736	0.000167641
Thy1	9.9304e-10	0.134404	0.759	0.655	1.75649e-05
Plekhb2	2.42665e-08	0.134235	0.685	0.601	0.000427624
Alg2	1.28089e-08	0.134192	0.778	0.675	0.000225885
Atp5h	1.25642e-09	0.134095	0.743	0.635	2.22147e-05
Tspyl4	4.52224e-09	0.133891	0.809	0.696	7.98763e-05
Rnf14	1.2432e-08	0.13373	0.671	0.563	0.000219251
Uqcrfs1	6.1263e-10	0.13361	0.515	0.396	1.08423e-05
Ppia	6.94733e-09	0.133362	0.814	0.72	0.00012262
Rpl10	1.74275e-10	0.133149	0.932	0.901	3.08833e-06
Capzb	1.05547e-06	0.133091	0.493	0.413	0.0184411
Eif2s2	2.2408e-08	0.132232	0.695	0.591	0.000394896
Ppp2r5c	5.09694e-10	0.132157	0.483	0.369	9.02159e-06
Gpx1	2.2135e-07	0.131803	0.45	0.363	0.00388691
Dnajc5	1.71003e-09	0.131685	0.864	0.76	3.02249e-05
Gng4	2.75322e-07	0.131653	0.4	0.31	0.00483135
Rplp0	9.53636e-09	0.131337	0.816	0.684	0.000168231
Rere	1.05226e-08	0.131231	0.53	0.423	0.000185608
Atp5c1	8.19915e-10	0.130914	0.566	0.455	1.45068e-05
Cend1	1.75117e-07	0.13076	0.579	0.477	0.00307628
Cox8a	2.8916e-11	0.130476	0.944	0.886	5.1323e-07
Rpl36a	2.71475e-09	0.130446	0.899	0.83	4.79642e-05
Rpl39	1.63024e-09	0.13012	0.956	0.896	2.88178e-05
Eif4b	8.73971e-09	0.129893	0.572	0.459	0.000154195
Fam213b	1.96793e-07	0.129849	0.53	0.436	0.00345647
Myl12b	8.722e-08	0.129582	0.491	0.397	0.00153429
Tubb5	7.5846e-07	0.129389	0.746	0.664	0.0132685
Rac1	1.17637e-07	0.129062	0.711	0.606	0.00206782
Aff4	8.62442e-08	0.12851	0.71	0.611	0.00151721
Rps25	5.41416e-10	0.12849	0.939	0.882	9.58252e-06
Klhdc10	9.44783e-08	0.128183	0.562	0.456	0.00166178
Smarca2	2.0725e-07	0.128167	0.698	0.598	0.00363972
Atp5j	4.7263e-08	0.127919	0.854	0.74	0.000832208
Vat1	3.73802e-07	0.12784	0.691	0.612	0.00655125
Ccdc85b	2.99786e-10	0.12745	0.216	0.127	5.30831e-06
Arf3	3.23341e-07	0.12717	0.831	0.741	0.00566978
Ywhah	8.02447e-08	0.127166	0.876	0.768	0.00141183
Ubqln2	1.04325e-09	0.127105	0.626	0.511	1.8451e-05
Hp1bp3	2.72085e-07	0.127004	0.72	0.617	0.0047751
Hnrnpa1	1.00538e-07	0.126806	0.821	0.713	0.00176807
Pafah1b2	6.2482e-08	0.126788	0.677	0.566	0.00109981
Vapa	1.23602e-07	0.126455	0.496	0.405	0.00217243
Flywch1	4.16231e-07	0.126049	0.681	0.595	0.00729362
Eif3i	1.71498e-06	0.125606	0.482	0.405	0.0299316
Prkar1a	3.79915e-08	0.125345	0.875	0.744	0.00066922
Rpl37	6.50225e-10	0.125253	0.969	0.943	1.15064e-05
Erp29	6.9632e-09	0.124348	0.7	0.599	0.000122894
6330403K07Rik	2.31979e-10	0.124346	0.942	0.905	4.10904e-06
Ncl	4.04176e-08	0.123686	0.662	0.549	0.000711875
Scoc	1.87291e-07	0.123503	0.795	0.697	0.00328995
Bend6	2.18044e-08	0.123448	0.556	0.447	0.000384281
Gadd45gip1	3.71054e-07	0.123277	0.37	0.287	0.00650345
Ahi1	1.65599e-08	0.122901	0.951	0.894	0.000291935
Ncald	4.2717e-07	0.122625	0.546	0.448	0.00748401
Stard7	1.00764e-06	0.122351	0.428	0.342	0.0176096
Ap2s1	4.6084e-09	0.122334	0.401	0.294	8.13936e-05
Rabggtb	2.81749e-08	0.122282	0.401	0.304	0.000496441
Ppp2r1a	1.98499e-09	0.122205	0.573	0.457	3.50807e-05
Eri3	2.22755e-09	0.12194	0.406	0.299	3.93609e-05
Nsa2	5.41881e-07	0.121852	0.516	0.419	0.00948833
Eif4h	1.88752e-08	0.121792	0.624	0.517	0.000332694
Atxn7l3b	1.47596e-06	0.121666	0.767	0.688	0.0257673
Olfm2	5.19027e-07	0.12153	0.355	0.267	0.00909076
Cadm3	1.61908e-07	0.121337	0.64	0.538	0.0028444
Mapre2	1.00437e-08	0.121319	0.605	0.493	0.000177171
Skp1a	1.23641e-06	0.121012	0.683	0.589	0.0215938
Rpl41	3.55326e-11	0.120731	0.996	0.985	6.30525e-07
Rab9b	7.00159e-07	0.120506	0.555	0.459	0.0122514
Camta1	7.47663e-08	0.120329	0.879	0.767	0.00131551
Got2	7.09549e-08	0.119978	0.567	0.468	0.00124881
Syt11	1.33246e-12	0.119922	0.97	0.928	2.36885e-08
Stx12	3.98431e-07	0.119844	0.509	0.413	0.0069825
Ube2m	4.29739e-08	0.119117	0.4	0.301	0.000756857
Dnm1	2.71238e-07	0.118587	0.587	0.502	0.00476049
Uchl1	5.64947e-07	0.118581	0.786	0.689	0.00989109
Crmp1	8.5623e-07	0.118403	0.549	0.464	0.0149746
Bex4	2.47612e-07	0.118393	0.477	0.383	0.00434683
AI413582	8.98617e-07	0.118219	0.512	0.428	0.0157123
Rpl14	1.0631e-08	0.117673	0.933	0.894	0.000187509
Rpl13	2.28158e-10	0.117506	0.982	0.955	4.04159e-06
C1qtnf4	2.49182e-07	0.117445	0.492	0.404	0.00437413
Arf1	6.24442e-09	0.117304	0.802	0.713	0.000110239
Sult4a1	3.69975e-07	0.117118	0.6	0.514	0.00648492
Prkacb	2.94299e-07	0.11707	0.906	0.799	0.0051626
Smdt1	8.73424e-07	0.116775	0.762	0.681	0.0152736
Hspa9	3.13198e-07	0.116738	0.479	0.379	0.00549318
Ndufb8	1.3642e-07	0.11665	0.683	0.593	0.00239745
Slc25a1	6.1323e-09	0.11662	0.275	0.182	0.000108266
Ldha	5.53055e-07	0.116231	0.383	0.295	0.00968344
Gng3	3.45389e-08	0.11614	0.857	0.75	0.000608506
Ghitm	3.13787e-07	0.115866	0.606	0.514	0.0055032
Gabarap	4.23092e-07	0.115825	0.673	0.569	0.007413
Add1	3.61743e-07	0.115495	0.596	0.486	0.00634135
Pmm1	2.86671e-07	0.115347	0.487	0.391	0.00502907
Ctnnb1	9.61334e-08	0.115337	0.621	0.506	0.00169079
Slc2a3	4.21701e-10	0.115236	0.461	0.345	7.46495e-06
Rpl23a	3.54945e-10	0.115177	0.975	0.943	6.28359e-06
Bex1	9.7013e-07	0.115007	0.733	0.622	0.0169569
Dctn1	8.51823e-09	0.114778	0.567	0.459	0.000150313
Mllt11	7.93878e-07	0.114709	0.836	0.736	0.0138865
Cep170b	2.31545e-07	0.114658	0.479	0.388	0.00406547
Grk2	8.64129e-07	0.11451	0.383	0.3	0.0151119
Mt1	2.00452e-10	0.114397	0.559	0.431	3.55142e-06
Hap1	4.53341e-07	0.114382	0.896	0.832	0.00794118
Chmp2b	4.4465e-08	0.114276	0.268	0.18	0.000782984
Impact	1.69953e-08	0.113705	0.932	0.848	0.000299593
Gdi1	1.09671e-07	0.113378	0.834	0.739	0.00192834
Ndufaf8	7.26912e-08	0.113284	0.518	0.419	0.00127922
Ppp2r2c	1.45538e-06	0.113101	0.605	0.507	0.025411
Armcx2	1.96007e-07	0.11308	0.35	0.258	0.00344287
Gm26917	8.1378e-07	0.113074	0.565	0.474	0.014233
Map4	1.20157e-07	0.113069	0.69	0.58	0.00211199
Prelid1	1.86181e-06	0.113063	0.391	0.311	0.0324886
Akap11	8.88186e-07	0.112994	0.7	0.6	0.0155308
Fam168b	2.15252e-06	0.112895	0.473	0.396	0.0375464
Ube2l3	1.06617e-07	0.11238	0.583	0.484	0.00187476
Cfl1	5.7934e-08	0.11237	0.851	0.761	0.00101993
Enho	1.45893e-08	0.11202	0.371	0.271	0.00025721
Cox5b	4.83131e-07	0.111838	0.765	0.674	0.00846252
Eif3h	2.77506e-07	0.111805	0.767	0.651	0.00486913
Chmp4b	6.92392e-07	0.111256	0.65	0.563	0.0121162
Cib2	2.93526e-08	0.110777	0.541	0.423	0.000517163
Rtn3	7.75214e-09	0.110656	0.961	0.915	0.00013681
Syngr1	1.12307e-07	0.110653	0.804	0.707	0.00197447
Cops9	1.94952e-06	0.110653	0.831	0.754	0.0340152
Rps6	7.92119e-07	0.110491	0.927	0.867	0.0138565
Mdh1	1.14676e-07	0.110377	0.683	0.584	0.002016
Rps2	1.42443e-07	0.110206	0.953	0.885	0.00250272
Fis1	1.38194e-06	0.109958	0.746	0.644	0.0241314
Atp6v0d1	1.394e-07	0.1097	0.537	0.424	0.0024494
Cx3cl1	3.57415e-09	0.109691	0.678	0.577	6.31409e-05
Agap3	3.36531e-09	0.108984	0.552	0.428	5.9455e-05
Wdr7	9.5029e-07	0.108682	0.473	0.38	0.016613
Usp27x	1.02409e-06	0.108542	0.234	0.163	0.0178949
Rpl8	5.84819e-08	0.108341	0.975	0.933	0.00102952
Arpc1a	3.45073e-07	0.108201	0.535	0.436	0.00604947
Ubb	6.41066e-07	0.107766	0.866	0.783	0.0112212
Kcnab2	1.38824e-06	0.107697	0.223	0.153	0.02424
Tmem130	1.05693e-10	0.107349	0.974	0.956	1.87383e-06
Arhgef17	7.21065e-07	0.107301	0.513	0.417	0.0126165
Gnl3l	2.8387e-07	0.106801	0.806	0.703	0.0049805
Ap1s1	4.17215e-07	0.106256	0.516	0.419	0.00731044
Rpsa	1.3886e-07	0.106155	0.908	0.83	0.00244005
Cltb	9.71716e-07	0.105302	0.726	0.627	0.0169837
Sv2a	2.50269e-07	0.105033	0.939	0.888	0.00439297
Pigt	6.647e-07	0.104943	0.246	0.172	0.0116336
Shroom2	1.28925e-06	0.104771	0.245	0.173	0.0225154
Sh3gl2	1.1411e-06	0.104323	0.457	0.368	0.0199338
Ids	1.15025e-07	0.10422	0.744	0.654	0.00202203
Rhob	1.55464e-06	0.103623	0.433	0.345	0.0271393
Rps8	2.75129e-07	0.10349	0.987	0.964	0.00482825
Sugt1	2.41314e-06	0.103332	0.368	0.294	0.0420754
Tbc1d9	6.87647e-07	0.102933	0.329	0.242	0.0120345
Cox5a	1.09296e-06	0.10261	0.534	0.439	0.0190951
Magel2	1.0981e-07	0.102294	0.45	0.35	0.00193069
Cntnap1	3.29531e-07	0.102251	0.254	0.174	0.00577799
Wdr82	1.79138e-06	0.101939	0.496	0.409	0.0312631
Map2k4	6.35992e-07	0.101724	0.615	0.5	0.011133
Phactr3	2.46779e-06	0.10109	0.359	0.278	0.043026
Uhmk1	5.26014e-07	0.100646	0.553	0.449	0.00921103
Gnas	9.17263e-07	0.0997288	0.956	0.89	0.0160374
Slc24a3	1.5635e-07	0.0996905	0.394	0.296	0.00274691
Mapk8ip3	6.92259e-07	0.0994603	0.642	0.555	0.0121145
Fabp5	1.38113e-07	0.0992416	0.377	0.286	0.00242706
Celf4	1.17393e-06	0.099088	0.947	0.87	0.0205062
Tspan7	4.3379e-08	0.0988705	0.925	0.869	0.000763948
Usp12	4.32431e-07	0.0988011	0.229	0.155	0.00757533
Samd14	1.3463e-06	0.0983662	0.375	0.289	0.0235104
Ppme1	2.22601e-06	0.0983287	0.541	0.457	0.0388238
Ndufs2	2.44023e-07	0.0975685	0.503	0.405	0.00428407
Psmb7	2.71893e-06	0.0973686	0.376	0.3	0.0473965
Pdxk	2.84212e-07	0.0970952	0.618	0.524	0.00498622
Pnpo	5.20628e-07	0.0964596	0.217	0.143	0.00911828
Mea1	2.53982e-06	0.0962537	0.383	0.298	0.0442767
Ndufb9	3.36992e-07	0.0960718	0.596	0.495	0.00590849
Ube4b	1.64079e-06	0.0958633	0.421	0.328	0.02864
Prps1	2.40828e-06	0.0951849	0.378	0.293	0.0419932
Vamp1	1.20898e-06	0.0942272	0.206	0.137	0.0211172
Atp6v1e1	1.69662e-06	0.0939124	0.527	0.437	0.0296129
Fam107a	6.76076e-09	0.0929387	0.106	0.047	0.000119341
Gpi1	2.28141e-07	0.0906049	0.611	0.506	0.00400593
Pfkm	1.21798e-06	0.0903027	0.323	0.242	0.0212733
Syt13	1.46281e-06	0.0898149	0.576	0.478	0.0255392
Atp5l	2.4908e-06	0.0897458	0.82	0.744	0.0434246
Adar	6.0072e-07	0.0884394	0.59	0.493	0.0105162
Irgq	9.90042e-08	0.08683	0.328	0.234	0.00174119
Plvap	3.73055e-08	0.0836891	0.247	0.163	0.000657174
Carmil2	2.27435e-06	0.0836587	0.259	0.186	0.0396602
Vgf	6.01515e-08	0.0819847	0.334	0.241	0.00105885
Fam102a	2.76516e-06	0.0814502	0.181	0.117	0.0481995
Tmem256	1.92501e-06	0.08046	0.529	0.432	0.0335895
Mapre3	9.65378e-07	0.0803929	0.461	0.368	0.0168758
Timm8b	4.01594e-07	0.0802566	0.783	0.672	0.00703754
Slc27a4	2.27077e-06	0.0795042	0.301	0.219	0.0395999
Sec61g	1.63742e-06	0.0788116	0.732	0.624	0.0285829
Atp5b	2.13985e-06	0.0782419	0.699	0.609	0.0373275
Begain	7.34952e-08	0.0779995	0.287	0.195	0.00129322
Cd59a	3.05854e-07	0.0767471	0.149	0.085	0.00536498
Lamtor1	9.28252e-07	0.076275	0.52	0.419	0.0162286
Atcay	6.59138e-07	0.0731896	0.552	0.45	0.0115369
Casd1	3.12038e-07	0.0726372	0.474	0.369	0.00547315
Grin1	7.96726e-07	0.0691879	0.666	0.563	0.0139355
Itih3	7.34627e-07	0.0650905	0.13	0.071	0.0128523
Mt2	1.00588e-06	0.0541724	0.218	0.143	0.0175798

## Sheet: Vgat_Female_P35FvsOVX
	p_val	avg_logFC	pct.1	pct.2	p_val_adjust
Plp1	1.1399e-49	0.32648	0.623	0.368	2.05627e-45
Tpt1	1.12551e-35	0.304899	0.858	0.726	2.02997e-31
Irs4	9.10897e-16	0.302559	0.54	0.421	1.63752e-11
Gabre	1.94171e-31	0.298521	0.416	0.229	3.50169e-27
Gm10076	1.39791e-33	0.265944	0.655	0.457	2.52113e-29
Ccnb1ip1	9.33288e-17	0.265022	0.319	0.196	1.67917e-12
Hpcal1	1.20929e-22	0.264308	0.462	0.306	2.17927e-18
Nnat	1.35974e-12	0.248522	0.712	0.594	2.43842e-08
Gal	2.28893e-06	0.247577	0.25	0.182	0.0398594
Eef1b2	8.85394e-25	0.23795	0.776	0.642	1.59601e-20
Eef1a1	2.33265e-30	0.233341	0.977	0.929	4.20624e-26
Rps12	1.91055e-24	0.215339	0.887	0.815	3.44339e-20
Socs2	1.95359e-26	0.206911	0.205	0.078	3.52212e-22
Npm1	4.87273e-17	0.20504	0.86	0.741	8.76945e-13
Hspa8	1.48652e-16	0.203013	0.875	0.777	2.67425e-12
Rps21	4.83415e-27	0.201818	0.944	0.892	8.71646e-23
Gabrq	8.83784e-17	0.201737	0.516	0.362	1.59019e-12
Rpl31	1.01521e-30	0.199921	0.963	0.906	1.83073e-26
Rpl39	2.29183e-26	0.199859	0.956	0.898	4.13171e-22
Selenow	3.18788e-25	0.199349	0.929	0.853	5.74678e-21
Fgfr1	4.85863e-10	0.197945	0.392	0.29	8.67315e-06
Cbx6	8.79382e-20	0.196747	0.723	0.562	1.58429e-15
Rplp2	1.43145e-22	0.195036	0.95	0.89	2.57947e-18
Calb1	2.10779e-10	0.193039	0.351	0.249	3.7664e-06
Scg2	1.24087e-11	0.192234	0.913	0.841	2.22191e-07
Rpl18	1.21688e-18	0.190757	0.86	0.752	2.19185e-14
Wdr6	4.91513e-17	0.190424	0.783	0.654	8.84527e-13
Rps24	1.51206e-24	0.189768	0.944	0.892	2.72549e-20
Rpl29	1.92971e-19	0.189333	0.884	0.785	3.47618e-15
Ctxn1	1.28738e-15	0.187951	0.672	0.537	2.31406e-11
Rpl22	1.51135e-16	0.186314	0.746	0.632	2.71876e-12
Rps15a	3.33043e-18	0.185305	0.909	0.861	5.99743e-14
Rps26	2.67296e-18	0.18455	0.912	0.827	4.814e-14
Rps10	3.76521e-18	0.183679	0.912	0.815	6.78002e-14
Hap1	2.54248e-17	0.183028	0.896	0.782	4.57621e-13
Rpl23	1.67113e-24	0.182932	0.957	0.908	3.01205e-20
Pdzrn4	7.70895e-18	0.179364	0.326	0.197	1.38807e-13
Rpl22l1	3.77282e-24	0.179081	0.963	0.928	6.79938e-20
Gpx3	9.7088e-16	0.179	0.593	0.446	1.74525e-11
AW551984	1.46544e-17	0.177633	0.664	0.505	2.63795e-13
Rplp0	5.72058e-16	0.177322	0.816	0.678	1.02873e-11
6330403K07Rik	1.74524e-21	0.175513	0.942	0.866	3.14474e-17
Prkacb	3.15748e-16	0.174617	0.906	0.798	5.67905e-12
Rps20	9.75351e-18	0.171686	0.902	0.822	1.75612e-13
Tmsb10	1.75622e-19	0.168862	0.949	0.906	3.16384e-15
Rps9	7.49764e-15	0.168779	0.887	0.808	1.34703e-10
Vat1l	5.07088e-12	0.168725	0.648	0.526	9.08804e-08
Rpl5	3.18186e-14	0.166655	0.822	0.711	5.71367e-10
Eif3e	8.71979e-13	0.166379	0.654	0.527	1.56398e-08
Rpl15	4.75125e-16	0.166351	0.896	0.808	8.54465e-12
Rpl7a	2.91329e-14	0.164439	0.848	0.76	5.23228e-10
Dcaf7	7.6643e-15	0.162915	0.656	0.515	1.37689e-10
Rpl36a	8.42193e-15	0.162269	0.899	0.838	1.51291e-10
Rps3a1	6.65145e-16	0.161567	0.917	0.855	1.196e-11
Zcchc12	1.0409e-12	0.16097	0.806	0.691	1.86686e-08
Mllt11	8.33531e-16	0.160754	0.836	0.717	1.4986e-11
Rps4x	1.80054e-15	0.160476	0.941	0.877	3.2361e-11
Nap1l5	8.34449e-16	0.159926	0.974	0.945	1.50017e-11
Rps16	7.91507e-16	0.159917	0.926	0.869	1.42313e-11
Tubb5	5.71793e-13	0.15983	0.746	0.621	1.02591e-08
Rpl37a	9.76935e-17	0.159628	0.957	0.919	1.7576e-12
Rps3	6.45137e-16	0.159545	0.932	0.863	1.16009e-11
Rpl34	2.00083e-16	0.159142	0.923	0.862	3.5989e-12
Rpl30	1.97721e-16	0.158162	0.911	0.83	3.5566e-12
Rps13	7.46017e-17	0.157771	0.923	0.854	1.34238e-12
Polr1d	3.38983e-16	0.15662	0.609	0.461	6.09662e-12
Eif1	3.29478e-18	0.156251	0.937	0.876	5.93357e-14
Rps18	9.36657e-15	0.156249	0.918	0.845	1.68252e-10
Mt1	9.35896e-21	0.155805	0.559	0.385	1.6863e-16
Nr2f2	6.97205e-10	0.155376	0.355	0.252	1.24374e-05
Rps27a	1.18052e-17	0.15498	0.963	0.931	2.12541e-13
Id4	2.35825e-08	0.154435	0.336	0.249	0.000418448
Rps28	2.036e-15	0.153824	0.939	0.893	3.6591e-11
Eif3f	3.72985e-13	0.153432	0.777	0.649	6.69321e-09
Cnih2	4.04043e-12	0.151955	0.675	0.548	7.24248e-08
Tsc22d1	6.3398e-14	0.151646	0.769	0.638	1.13819e-09
Gng3	1.29945e-13	0.151592	0.857	0.751	2.33278e-09
Ctnnb1	3.01996e-14	0.15136	0.621	0.479	5.42324e-10
Rnf187	4.0288e-15	0.151244	0.731	0.578	7.23935e-11
Eif1b	1.83162e-13	0.150577	0.758	0.631	3.28757e-09
Rpl23a	1.26927e-18	0.150142	0.975	0.935	2.28609e-14
Rpl26	1.45275e-15	0.14993	0.96	0.917	2.61117e-11
Tmcc3	7.5031e-13	0.149491	0.454	0.329	1.34591e-08
Hsp90ab1	2.14036e-14	0.14931	0.929	0.847	3.84451e-10
Pea15a	5.3195e-11	0.148394	0.755	0.637	9.51498e-07
Rps7	3.7615e-15	0.148196	0.927	0.877	6.75941e-11
Tbca	7.252e-13	0.147881	0.743	0.626	1.30094e-08
Rpl7	5.59183e-12	0.145023	0.905	0.823	1.00211e-07
Gda	6.36871e-10	0.144892	0.471	0.355	1.13624e-05
Ucp2	1.47484e-17	0.144889	0.167	0.072	2.65472e-13
Stard7	1.38546e-12	0.144796	0.428	0.307	2.48441e-08
mt-Nd3	1.28653e-17	0.144091	0.974	0.926	2.31614e-13
Rpl27a	2.85672e-17	0.143194	0.968	0.934	5.14153e-13
Fem1b	5.94936e-10	0.142407	0.538	0.429	1.06154e-05
Eif4a2	2.67988e-12	0.142297	0.929	0.858	4.80503e-08
Rps17	2.19818e-13	0.141389	0.908	0.857	3.94529e-09
Apoc3	1.58735e-13	0.14084	0.158	0.076	2.84929e-09
Uqcrh	5.37134e-13	0.139511	0.893	0.814	9.6378e-09
Ets2	1.4281e-11	0.139377	0.361	0.249	2.55687e-07
Rpl12	2.04521e-10	0.139322	0.877	0.783	3.65479e-06
Zbtb20	5.80953e-10	0.139252	0.767	0.656	1.03665e-05
Sez6l	7.67079e-12	0.138842	0.696	0.569	1.37414e-07
Marcksl1	7.71326e-12	0.137891	0.724	0.592	1.38168e-07
Rps14	4.34104e-13	0.13773	0.968	0.92	7.78957e-09
Clta	2.77704e-12	0.137696	0.721	0.595	4.97895e-08
Rpl36	2.96079e-12	0.137256	0.932	0.863	5.30811e-08
Rpl35	4.66461e-12	0.13648	0.882	0.804	8.36039e-08
Pak3	1.85309e-10	0.135299	0.798	0.673	3.31184e-06
Rps27	2.97308e-14	0.13492	0.978	0.962	5.33936e-10
Irs2	3.67024e-12	0.133346	0.283	0.182	6.57928e-08
Rps19	6.68908e-12	0.133209	0.958	0.913	1.19842e-07
Cfl1	4.30566e-12	0.131995	0.851	0.749	7.71747e-08
Rpl35a	6.39471e-12	0.131753	0.951	0.909	1.14574e-07
Serf2	6.8307e-12	0.131321	0.849	0.743	1.22372e-07
Sqstm1	4.10576e-10	0.131271	0.602	0.475	7.33165e-06
Aff4	2.89224e-11	0.130608	0.71	0.58	5.17682e-07
Bri3	8.10304e-12	0.13011	0.626	0.493	1.45142e-07
BC029722	2.08057e-11	0.129803	0.691	0.563	3.72485e-07
Celf6	2.2343e-11	0.129138	0.62	0.487	3.99962e-07
Naca	1.22634e-09	0.129066	0.862	0.764	2.18657e-05
Rplp1	2.31529e-14	0.128888	0.98	0.94	4.15849e-10
Ndufa6	5.26952e-11	0.128767	0.797	0.693	9.42612e-07
Btf3	6.80807e-11	0.12861	0.683	0.571	1.21749e-06
Tubb3	6.23135e-12	0.128553	0.555	0.426	1.11653e-07
Rps6	2.52674e-10	0.128534	0.927	0.847	4.51403e-06
Rpl21	6.05893e-13	0.12838	0.972	0.927	1.08703e-08
Rpl10a	8.94484e-10	0.126695	0.907	0.822	1.5954e-05
Rpl32	5.95532e-12	0.126421	0.954	0.912	1.06713e-07
H3f3a	3.2604e-14	0.126297	0.586	0.43	5.85437e-10
Olfm3	2.90793e-08	0.126166	0.323	0.235	0.000515635
Rpl17	4.98802e-14	0.126069	0.982	0.945	8.956e-10
Atp1a2	2.55678e-19	0.126058	0.217	0.103	4.60553e-15
Rps25	8.20664e-13	0.125668	0.939	0.898	1.47203e-08
Ube2r2	2.38326e-11	0.125572	0.563	0.434	4.26604e-07
Prkce	1.05265e-09	0.125492	0.544	0.423	1.8772e-05
Rpl11	1.02616e-11	0.125489	0.957	0.909	1.83775e-07
Wdr82	3.36183e-13	0.124995	0.496	0.36	6.03348e-09
Rpl19	1.24952e-12	0.124691	0.957	0.903	2.24089e-08
Tmem130	3.58643e-13	0.124588	0.974	0.933	6.43621e-09
Esr1	3.75192e-09	0.124434	0.365	0.265	6.68029e-05
Hpcal4	2.13028e-11	0.124172	0.549	0.416	3.81363e-07
Mt3	1.09555e-09	0.124007	0.82	0.72	1.95359e-05
1110008P14Rik	2.952e-10	0.123933	0.527	0.409	5.27315e-06
Aldoc	1.77752e-09	0.123705	0.305	0.212	3.16772e-05
Map2k4	2.31189e-10	0.123365	0.615	0.491	4.13065e-06
Rpl41	2.7168e-15	0.122664	0.996	0.99	4.88237e-11
Pnmal2	1.70374e-09	0.122559	0.873	0.776	3.03691e-05
Rpl28	3.74475e-09	0.122504	0.898	0.816	6.66791e-05
Kcns2	8.80913e-11	0.122145	0.158	0.086	1.57498e-06
Rack1	1.31602e-09	0.120493	0.711	0.598	2.34633e-05
Oaz2	8.69857e-09	0.119948	0.738	0.615	0.000154704
Clip3	1.50782e-09	0.119483	0.753	0.638	2.688e-05
Rpsa	3.45876e-10	0.119287	0.908	0.811	6.17734e-06
Hmgn2	9.8566e-11	0.118935	0.542	0.412	1.76206e-06
Tubb4a	2.88284e-08	0.118502	0.674	0.556	0.000511215
Klf9	1.45969e-13	0.118211	0.349	0.227	2.62029e-09
Ttc9b	4.59391e-11	0.117761	0.44	0.319	8.21851e-07
Lonrf2	2.93311e-11	0.117683	0.759	0.632	5.24968e-07
Ogfrl1	1.67638e-08	0.117561	0.513	0.406	0.000297641
Baiap3	6.0663e-13	0.117153	0.76	0.619	1.08829e-08
Ywhah	5.12318e-08	0.116787	0.876	0.784	0.000907007
Snrpg	1.93177e-10	0.116697	0.451	0.336	3.45227e-06
Apbb1	8.15965e-12	0.116422	0.553	0.427	1.46147e-07
Gadd45gip1	7.93851e-10	0.116366	0.37	0.265	1.41599e-05
Rps23	4.9453e-10	0.116354	0.963	0.929	8.82735e-06
Rpl9	8.18667e-11	0.115027	0.957	0.915	1.46378e-06
Hspe1	1.02143e-08	0.114901	0.722	0.616	0.00018159
Rtl8b	1.14215e-09	0.11487	0.665	0.543	2.03657e-05
Ftl1	1.15408e-07	0.114821	0.872	0.784	0.0020381
Rps11	1.04812e-10	0.114578	0.95	0.897	1.87362e-06
Eef2	1.82378e-09	0.114271	0.833	0.738	3.24997e-05
Mapk8ip2	7.64254e-10	0.114247	0.636	0.511	1.36328e-05
B630019K06Rik	3.64567e-09	0.114127	0.633	0.507	6.49222e-05
Rps15	1.60856e-12	0.113745	0.975	0.938	2.88431e-08
Wdr26	9.95032e-09	0.113549	0.421	0.317	0.000176907
Dlg4	2.59986e-08	0.113432	0.711	0.602	0.000461189
Peg3	5.77112e-10	0.113421	0.937	0.858	1.02986e-05
Ssr4	2.98424e-11	0.11306	0.56	0.431	5.34089e-07
Ppdpf	5.87206e-11	0.113041	0.47	0.349	1.05028e-06
Rgs2	1.2919e-06	0.113009	0.345	0.266	0.0225746
Itm2c	4.12056e-11	0.112111	0.955	0.903	7.3725e-07
Rasgrf2	1.55904e-07	0.112096	0.551	0.447	0.00274968
Atp5g2	1.52101e-10	0.111417	0.669	0.548	2.71851e-06
Sec61g	1.02468e-11	0.111139	0.732	0.585	1.8352e-07
Bex2	5.22748e-10	0.110527	0.849	0.729	9.33052e-06
Cbarp	3.80093e-10	0.110493	0.947	0.874	6.7877e-06
Pdxp	3.35877e-12	0.110478	0.705	0.561	6.02126e-08
D430019H16Rik	9.78031e-10	0.110055	0.416	0.31	1.74422e-05
Snrpf	4.51213e-11	0.109464	0.666	0.537	8.07265e-07
Cib2	6.96843e-11	0.109257	0.541	0.405	1.24609e-06
Map1lc3a	1.51937e-08	0.108312	0.8	0.676	0.000269826
Capzb	7.06039e-09	0.108156	0.493	0.38	0.000125597
Tmem215	1.50866e-07	0.10717	0.117	0.066	0.00266098
Hsbp1	2.41983e-10	0.107122	0.71	0.572	4.32326e-06
Ap2s1	2.70942e-07	0.106855	0.401	0.312	0.00476886
Itih3	1.39949e-17	0.106339	0.13	0.048	2.51935e-13
Rps2	2.15959e-09	0.105726	0.953	0.876	3.84731e-05
Cct2	2.92593e-10	0.10569	0.539	0.411	5.22687e-06
Rpl10	7.39508e-09	0.10549	0.932	0.889	0.000131544
Zrsr1	3.78879e-10	0.105477	0.356	0.255	6.76641e-06
Hint1	8.4423e-08	0.105181	0.834	0.737	0.00149234
Eid1	3.90822e-08	0.104487	0.776	0.664	0.00069234
Cpe	4.82013e-10	0.104433	0.902	0.796	8.60538e-06
Cox7c	2.05191e-09	0.104417	0.921	0.872	3.65568e-05
Hipk1	1.72969e-09	0.1044	0.418	0.304	3.08265e-05
Nedd4	1.26935e-07	0.104193	0.788	0.678	0.0022409
Rps5	1.7501e-08	0.103993	0.961	0.904	0.000310677
Ndufv3	3.15246e-11	0.103856	0.62	0.487	5.64133e-07
Gng4	1.66392e-08	0.103753	0.4	0.301	0.000295446
Gnas	2.49781e-07	0.103459	0.956	0.904	0.00439789
Tollip	1.37708e-08	0.103203	0.404	0.302	0.000244612
Ywhag	2.99322e-08	0.103057	0.902	0.815	0.000530638
Chp1	1.03721e-08	0.102317	0.558	0.45	0.000184384
Aes	2.87588e-07	0.101871	0.711	0.602	0.00506127
Rpl37	4.17632e-10	0.101759	0.969	0.957	7.45725e-06
Rmnd5a	3.23089e-09	0.101613	0.302	0.211	5.75421e-05
Gdap1l1	1.10034e-11	0.101467	0.261	0.164	1.97038e-07
Nap1l1	1.62993e-07	0.101393	0.72	0.609	0.00287357
Eef1g	2.49336e-07	0.101101	0.932	0.83	0.0043903
Aprt	1.07436e-08	0.101017	0.304	0.216	0.000190979
Gnao1	3.78115e-07	0.100658	0.834	0.736	0.00664877
Plekhb1	8.21686e-08	0.100423	0.206	0.136	0.00145266
Tub	1.34272e-07	0.100418	0.647	0.539	0.00236949
Ppp1r1a	5.71065e-10	0.100212	0.465	0.339	1.01912e-05
Ptms	2.98596e-08	0.100087	0.726	0.629	0.00052938
Basp1	1.49053e-06	0.0994248	0.84	0.729	0.0260291
Ncor2	1.81668e-08	0.0990361	0.346	0.253	0.000322478
Ywhaz	1.56118e-06	0.0988391	0.845	0.742	0.0272583
Vat1	2.02368e-07	0.0985635	0.691	0.589	0.00356531
Rpl4	1.23669e-07	0.0985252	0.923	0.833	0.00218349
Timm29	6.52457e-09	0.0984578	0.345	0.25	0.000116085
Cops9	6.8448e-07	0.0983569	0.831	0.748	0.012003
Mtch1	6.71641e-07	0.0983495	0.824	0.718	0.0117786
Ypel3	5.31471e-08	0.0983004	0.712	0.597	0.000940757
Gabarap	2.01571e-09	0.0982008	0.673	0.55	3.59159e-05
Ubl5	4.39959e-09	0.098192	0.717	0.598	7.83039e-05
Rpl24	9.75038e-09	0.0981836	0.969	0.915	0.000173362
Gdi1	1.25975e-08	0.0980728	0.834	0.718	0.000223845
Dlx1	2.24833e-07	0.0978857	0.518	0.418	0.00395976
Enpp2	8.13979e-08	0.0976869	0.164	0.1	0.00143911
Tuba1a	2.87302e-08	0.0973912	0.743	0.623	0.000509501
Rps29	2.19155e-10	0.0973192	0.986	0.971	3.91586e-06
Eif4b	6.64435e-09	0.0972772	0.572	0.455	0.00011821
Tpi1	1.34451e-08	0.0971131	0.672	0.552	0.000238852
Usp11	3.34737e-09	0.0967998	0.612	0.485	5.96133e-05
Add1	1.59815e-07	0.0966923	0.596	0.491	0.0028185
Syn2	4.70793e-07	0.0966828	0.725	0.606	0.00826996
Mien1	1.21148e-08	0.0965909	0.482	0.37	0.000215292
Chrnb2	4.65636e-09	0.0964498	0.326	0.228	8.28646e-05
Snap47	8.81673e-08	0.0964206	0.64	0.519	0.00155845
Zmiz2	1.46056e-07	0.0960028	0.377	0.285	0.00257643
Npy1r	1.01666e-07	0.0953768	0.13	0.075	0.00179623
Npepps	1.44253e-08	0.0953747	0.631	0.51	0.000256207
Ube2e3	2.39468e-08	0.0952793	0.343	0.248	0.000424863
Psma5	1.71292e-09	0.0952108	0.388	0.288	3.05311e-05
Pgr	1.60638e-07	0.0949804	0.265	0.188	0.00283253
Arhgef17	1.15919e-08	0.094954	0.513	0.399	0.000206011
Psmb1	1.93924e-06	0.0945238	0.672	0.583	0.0338068
Jun	1.42948e-07	0.0944762	0.187	0.121	0.00252175
Rps8	2.42958e-08	0.0944147	0.987	0.947	0.000431032
Pdyn	1.27395e-07	0.0942733	0.111	0.061	0.0022489
Fam57b	1.31368e-11	0.0941608	0.275	0.174	2.35215e-07
Ptpro	8.6337e-09	0.0941131	0.49	0.379	0.000153559
Copz1	2.16231e-07	0.0941031	0.356	0.268	0.0038087
Atp5a1	1.38788e-07	0.0940668	0.741	0.635	0.00244906
Arhgdig	2.25692e-07	0.0940648	0.506	0.405	0.00397465
Snhg6	4.95645e-11	0.0939226	0.458	0.33	8.86659e-07
Gpd2	3.25362e-08	0.0939195	0.363	0.269	0.000576672
1110032A03Rik	2.45227e-09	0.0936562	0.412	0.304	4.36847e-05
Anp32b	5.9739e-11	0.093637	0.365	0.25	1.06837e-06
Enc1	1.0352e-07	0.0934901	0.449	0.346	0.00182889
Mturn	5.30328e-10	0.0934669	0.241	0.154	9.46529e-06
Fam210a	1.83256e-06	0.0930136	0.184	0.125	0.0319616
Syn1	1.38782e-06	0.0929734	0.599	0.496	0.0242382
Rabggtb	4.24755e-09	0.0929432	0.401	0.296	7.56065e-05
Atp5e	9.41445e-09	0.0928012	0.755	0.635	0.000167398
Abr	2.78005e-08	0.0927635	0.683	0.574	0.000493069
Ppp1r17	1.84411e-07	0.0924159	0.139	0.083	0.00325043
Fam32a	4.62845e-10	0.0924016	0.43	0.315	8.26363e-06
Nono	5.41428e-07	0.0922166	0.541	0.438	0.00950423
Pgk1	1.33877e-08	0.0917613	0.471	0.358	0.00023786
Rab9b	2.91306e-08	0.0916806	0.555	0.436	0.000516515
Fau	3.54878e-08	0.0912625	0.973	0.939	0.000628809
Mlf2	3.23285e-07	0.090715	0.647	0.53	0.0056869
Slc1a3	6.0068e-10	0.0907083	0.114	0.055	1.07173e-05
Gnaq	3.89149e-09	0.0906907	0.712	0.59	6.92842e-05
Txn2	1.33184e-07	0.0906473	0.422	0.327	0.00235056
Rpl38	7.89234e-08	0.0905761	0.971	0.952	0.00139576
Camk2b	1.79602e-07	0.0905385	0.784	0.668	0.0031662
Cops2	4.25268e-09	0.0903114	0.483	0.362	7.56934e-05
Enho	3.22926e-10	0.0900384	0.371	0.264	5.76779e-06
Ly6e	1.60228e-07	0.0899716	0.522	0.423	0.00282546
Arf3	1.63633e-06	0.0899382	0.831	0.739	0.0285573
Pfkm	9.68807e-08	0.0897401	0.323	0.239	0.00171188
A730017C20Rik	1.48248e-08	0.0897268	0.677	0.56	0.000263288
Slc25a12	1.94198e-07	0.0895427	0.416	0.317	0.00342176
Swi5	3.33246e-08	0.0895044	0.714	0.603	0.000590578
Cox7a2l	9.50377e-07	0.0893864	0.872	0.784	0.0166382
Ip6k1	8.67734e-07	0.0892462	0.589	0.489	0.0152027
Bex4	1.40605e-08	0.0890737	0.477	0.37	0.000249743
Adap1	1.34224e-09	0.0888425	0.293	0.2	2.39294e-05
Ift22	1.73619e-08	0.0888345	0.307	0.217	0.000308226
Cct5	4.82106e-07	0.0887415	0.508	0.41	0.00846772
Cyb5r3	1.34154e-08	0.0886131	0.37	0.27	0.000238337
Ap2m1	1.9071e-07	0.0885137	0.693	0.581	0.0033607
Pim3	1.8575e-08	0.0884675	0.142	0.082	0.000329688
Herc3	3.19156e-07	0.0884595	0.51	0.406	0.00561491
Tnks2	1.42346e-10	0.0883742	0.404	0.289	2.5443e-06
Prrt1	3.11225e-08	0.0882987	0.407	0.305	0.000551646
Arpc1a	4.54033e-08	0.0881788	0.535	0.427	0.000804047
Slc6a11	6.6703e-10	0.0879335	0.373	0.264	1.18998e-05
Usp22	4.15459e-08	0.0878972	0.77	0.646	0.000735903
Rpl18a	4.37288e-07	0.0878476	0.96	0.903	0.00768446
Tspyl4	1.77137e-06	0.0878476	0.809	0.706	0.0309016
Rpl6	7.7539e-07	0.0874625	0.96	0.926	0.013591
Nbdy	9.47515e-07	0.0874369	0.597	0.498	0.0165891
Arhgap1	4.25302e-08	0.0872871	0.268	0.188	0.000753295
Csdc2	5.27944e-07	0.0871758	0.385	0.295	0.00926859
Olfm2	1.17195e-07	0.0870915	0.355	0.265	0.00206955
Fam107a	4.02485e-11	0.0866778	0.106	0.046	7.20166e-07
Atxn10	1.13151e-07	0.0865966	0.474	0.371	0.00199836
Sult4a1	1.57835e-06	0.0863505	0.6	0.496	0.0275533
Hk1	1.29814e-06	0.0862408	0.461	0.367	0.0226824
Uqcrb	4.21125e-09	0.0860903	0.65	0.529	7.49644e-05
Ctnna2	6.19437e-08	0.085994	0.379	0.283	0.00109609
Alg2	1.48435e-07	0.0859088	0.778	0.664	0.00261825
Ndufc2	3.70856e-08	0.085812	0.551	0.434	0.000657045
Zfp706	1.89236e-06	0.0857697	0.647	0.546	0.0329989
Hspa4	1.33429e-07	0.0856898	0.493	0.387	0.00235475
Cnbp	4.48469e-07	0.0854314	0.625	0.511	0.00788006
Tceal8	5.08428e-08	0.0853598	0.266	0.183	0.000900222
Hsph1	4.26552e-07	0.0852538	0.603	0.487	0.00749665
Bola2	3.27421e-08	0.0852202	0.573	0.454	0.000580288
D8Ertd738e	1.07345e-07	0.0851223	0.722	0.609	0.00189603
H2afx	3.59875e-07	0.0850892	0.186	0.121	0.00632839
Maged1	4.67982e-09	0.0850854	0.837	0.743	8.32774e-05
Kpnb1	3.07579e-07	0.0848619	0.44	0.339	0.00541154
Aip	2.84275e-09	0.0848534	0.464	0.347	5.06379e-05
Myl12b	1.4057e-07	0.0848448	0.491	0.385	0.00248022
Rasgrp1	1.89679e-06	0.084781	0.355	0.267	0.0330743
Fbxl16	1.61557e-07	0.0847373	0.548	0.437	0.00284857
Zfp667	8.7529e-09	0.084702	0.226	0.146	0.000155662
Pop5	4.40358e-09	0.0846397	0.428	0.318	7.83706e-05
Sub1	1.87964e-06	0.0845472	0.8	0.688	0.032779
Rab1b	2.98403e-08	0.0843423	0.384	0.283	0.000529068
Nicn1	4.00271e-09	0.0841662	0.525	0.398	7.12602e-05
1110065P20Rik	5.30787e-08	0.0841335	0.543	0.434	0.0009396
Grb10	9.67074e-08	0.0839952	0.665	0.543	0.00170892
Mrfap1	2.42134e-06	0.0839773	0.884	0.778	0.0421482
Rac1	5.58751e-07	0.0836934	0.711	0.598	0.00980608
Gpx1	7.41484e-08	0.0836336	0.45	0.343	0.00131146
Mxd4	1.88858e-07	0.0833822	0.289	0.206	0.00332825
Slc25a17	5.30664e-07	0.0833671	0.282	0.202	0.00931581
Zfp92	5.48859e-07	0.0833262	0.214	0.147	0.00963413
Rab15	9.88778e-07	0.0832681	0.368	0.286	0.0173046
Dgcr2	2.77822e-08	0.0830622	0.573	0.456	0.000492772
Rab26os	4.83055e-10	0.0829602	0.42	0.312	8.6235e-06
Snx10	7.9594e-08	0.0826478	0.561	0.447	0.00140746
Nr2f1	1.5499e-08	0.0825738	0.118	0.063	0.000275231
Mapre3	1.83324e-08	0.0824673	0.461	0.35	0.000325401
Eid2b	2.81074e-07	0.0821662	0.18	0.117	0.00494691
Vdac2	1.16886e-06	0.081974	0.515	0.416	0.0204399
C1qtnf4	9.97668e-08	0.081926	0.492	0.398	0.00176278
Eif3k	2.19078e-06	0.0817571	0.706	0.608	0.0381633
Ecel1	3.61846e-08	0.0816457	0.423	0.322	0.000641118
Ppm1l	5.90998e-09	0.0816275	0.502	0.375	0.000105162
Nek7	8.84307e-09	0.0815077	0.157	0.092	0.000157256
Bad	4.13352e-07	0.0814476	0.304	0.223	0.00726548
Sptan1	2.43679e-06	0.0811839	0.6	0.496	0.0424147
Tmod1	1.9768e-09	0.0811803	0.148	0.082	3.52245e-05
Mettl9	1.26848e-06	0.0811756	0.454	0.363	0.0221718
Dad1	5.66518e-08	0.0811111	0.426	0.324	0.00100268
Snn	6.57877e-07	0.0810058	0.392	0.304	0.0115392
Odc1	3.06686e-08	0.0808907	0.374	0.277	0.000543662
Abhd11	7.81525e-07	0.080881	0.244	0.174	0.0136978
Id2	1.24618e-06	0.0806553	0.161	0.103	0.0217844
Riiad1	2.87028e-09	0.0801494	0.215	0.135	5.11255e-05
Slitrk5	4.5351e-08	0.0797637	0.359	0.264	0.000803166
2410015M20Rik	2.52847e-07	0.0796476	0.587	0.492	0.00445112
Anapc11	6.96172e-09	0.079373	0.434	0.323	0.000123849
Hdgf	1.86654e-07	0.0791349	0.601	0.486	0.00328959
Glul	1.12797e-08	0.0788055	0.306	0.214	0.000200475
Znrd1	1.30385e-06	0.0787892	0.155	0.099	0.0227808
Tspyl3	5.10937e-08	0.0786676	0.324	0.231	0.000904614
Mrpl30	4.55128e-07	0.0785793	0.563	0.454	0.00799614
Ubfd1	1.17274e-07	0.078489	0.428	0.328	0.00207082
2010107E04Rik	1.11304e-08	0.0784665	0.702	0.58	0.000197842
Chd4	9.52776e-08	0.0783322	0.509	0.396	0.00168384
Zer1	5.77045e-08	0.0781573	0.599	0.482	0.00102125
Rragc	1.09098e-07	0.0780533	0.328	0.236	0.0019269
Mtmr6	6.28418e-08	0.0780461	0.454	0.348	0.00111186
Sema6b	3.03492e-10	0.0779489	0.392	0.28	5.42098e-06
Mapk3	7.40407e-07	0.0779396	0.372	0.283	0.0129793
Cst3	1.56498e-06	0.0777867	0.664	0.561	0.027323
Ube2e1	3.02378e-07	0.0777224	0.497	0.396	0.00532126
Pdzd4	2.50946e-08	0.0776915	0.277	0.193	0.000445178
Vgf	1.62548e-07	0.0775178	0.334	0.245	0.00286588
Akr1a1	9.39291e-07	0.0773095	0.718	0.617	0.016446
Gtf2i	1.07455e-06	0.0772601	0.512	0.411	0.0187971
Pigq	8.06267e-08	0.0768914	0.237	0.162	0.00142556
Tsnax	9.85834e-07	0.0767267	0.467	0.367	0.0172541
Nrsn2	5.94587e-08	0.076456	0.896	0.829	0.00105218
Foxp4	9.53929e-07	0.0764219	0.254	0.182	0.0166995
Rhob	8.00235e-08	0.0759179	0.433	0.331	0.00141498
Polr2l	1.96409e-07	0.0758119	0.332	0.245	0.00346053
Wdr77	1.80442e-07	0.0757903	0.281	0.197	0.00318083
Atp5c1	3.79073e-07	0.0756961	0.566	0.449	0.00666523
Polr3k	8.95335e-07	0.0756866	0.304	0.223	0.0156809
Ptprk	3.44561e-07	0.07496	0.283	0.205	0.00605979
Glud1	8.8314e-07	0.074833	0.463	0.364	0.01547
Sccpdh	1.3888e-07	0.0747672	0.38	0.289	0.00245054
Grik1	1.30501e-06	0.0746859	0.256	0.184	0.0227999
Ubqln2	1.0793e-06	0.074471	0.626	0.511	0.0188791
Rpl13	2.15879e-06	0.0743622	0.982	0.958	0.0376104
Samd14	9.31823e-08	0.0743509	0.375	0.282	0.0016469
Psenen	2.6189e-07	0.0742706	0.36	0.27	0.00460978
Gatsl2	7.33823e-08	0.0739957	0.586	0.468	0.00129799
Rpl27	7.37516e-07	0.073841	0.803	0.695	0.0129294
Me1	2.05326e-06	0.073814	0.158	0.102	0.0357821
Psmb7	1.29121e-06	0.073703	0.376	0.289	0.0225638
Myl6	7.53876e-07	0.0736346	0.689	0.573	0.0132147
Sec61b	1.237e-06	0.0736314	0.513	0.415	0.0216264
4833439L19Rik	5.72786e-07	0.0735079	0.413	0.321	0.0100507
Tmem70	1.55317e-08	0.0732383	0.24	0.159	0.000275797
Grk2	1.00562e-06	0.0732217	0.383	0.295	0.0175963
Deaf1	3.70407e-09	0.0728027	0.367	0.259	6.59583e-05
Morn2	4.95992e-07	0.0727182	0.332	0.247	0.00871061
Acox1	4.10303e-07	0.0727009	0.46	0.358	0.00721271
Cep19	4.76634e-07	0.0724719	0.368	0.277	0.00837207
Arl4a	7.94374e-08	0.0723584	0.334	0.242	0.00140477
Mrps12	2.36352e-08	0.0722813	0.511	0.394	0.000419359
Chmp7	6.32296e-08	0.0720864	0.323	0.231	0.00111866
Ran	1.26622e-06	0.0719689	0.692	0.577	0.0221334
Fam214a	1.65047e-06	0.0719332	0.206	0.142	0.0288024
Rap1gap	3.95073e-07	0.0717743	0.471	0.37	0.00694577
Sox4	2.3803e-06	0.0717261	0.322	0.246	0.0414363
Chmp2b	2.29968e-06	0.0716707	0.268	0.194	0.0400444
Galnt16	2.09174e-06	0.071456	0.592	0.487	0.0364465
Snx3	8.36188e-08	0.0713725	0.485	0.374	0.00147821
Scml4	4.20182e-07	0.0713552	0.108	0.06	0.00738512
Ykt6	1.82858e-07	0.0713148	0.278	0.195	0.00322323
Rps6ka6	4.55743e-07	0.0712458	0.15	0.092	0.0080065
Ensa	7.07316e-07	0.0712092	0.59	0.482	0.0124021
2300009A05Rik	2.25634e-06	0.071071	0.46	0.364	0.0392987
Ost4	5.05474e-07	0.0710568	0.419	0.324	0.00887612
Crkl	2.06049e-07	0.0709506	0.266	0.188	0.00362997
Nenf	5.21945e-07	0.0705634	0.802	0.698	0.00916431
Uba52	3.13512e-11	0.0705202	0.457	0.322	5.61062e-07
Coprs	3.04281e-07	0.0701346	0.452	0.346	0.00535444
Mtss1l	8.2293e-07	0.0699666	0.278	0.202	0.014421
Gnpda1	1.04371e-07	0.0699104	0.206	0.135	0.00184372
Ube2v2	3.46752e-07	0.0698337	0.588	0.484	0.00609799
Egfl7	2.67787e-06	0.069714	0.203	0.139	0.046595
Krtcap2	7.30671e-07	0.0696706	0.464	0.364	0.0128101
Tmem141	1.31496e-07	0.0694378	0.265	0.187	0.00232104
Epb41l4aos	1.00678e-06	0.0694272	0.267	0.192	0.0176156
Fndc9	6.49847e-08	0.0693239	0.286	0.198	0.00114958
Acvr2a	8.97545e-08	0.0693001	0.196	0.127	0.00158641
2610035D17Rik	4.82439e-08	0.0692121	0.107	0.056	0.000854303
Selenof	1.72031e-09	0.069119	0.573	0.445	3.0661e-05
Ndufs4	2.09888e-08	0.0690906	0.383	0.28	0.000372466
Wdr7	6.59117e-07	0.0690161	0.473	0.371	0.0115603
Mapk1	1.90768e-06	0.0689821	0.747	0.635	0.0332605
Hspa12a	1.1593e-06	0.0689324	0.316	0.237	0.0202738
Uqcrfs1	6.15386e-07	0.0689313	0.515	0.409	0.0107969
Mt2	4.45454e-10	0.0683341	0.218	0.133	7.95357e-06
Magel2	1.30332e-08	0.068317	0.45	0.335	0.000231574
Ifngr2	2.15662e-07	0.0682897	0.244	0.167	0.00379888
Hs3st5	3.42315e-07	0.0681898	0.155	0.095	0.00602099
Bcas2	2.27873e-07	0.068089	0.485	0.386	0.00401284
Rnf112	2.51992e-07	0.0678036	0.494	0.391	0.00443631
Ncl	3.42486e-07	0.0676965	0.662	0.533	0.00602365
Srsf12	9.84941e-07	0.0676672	0.274	0.196	0.0172394
Srxn1	5.60173e-07	0.0671632	0.317	0.231	0.00983047
Pnmal1	1.73402e-06	0.0671191	0.667	0.544	0.0302552
Gapdh	5.54458e-08	0.0666834	0.638	0.517	0.000981391
Fbxo18	7.72484e-08	0.0664096	0.216	0.142	0.00136622
Bax	2.85778e-06	0.0662607	0.352	0.271	0.0497082
Irgq	1.03941e-07	0.0661801	0.328	0.236	0.00183621
Atp6v0d1	1.93358e-07	0.0661237	0.537	0.416	0.00340717
Jmy	2.20453e-07	0.0658459	0.202	0.132	0.00388284
Pim2	3.00869e-09	0.065767	0.262	0.17	5.35877e-05
C1qbp	1.38509e-06	0.0657057	0.321	0.237	0.0241919
Sec23a	2.19938e-06	0.0656978	0.41	0.318	0.038311
Nyap1	2.51308e-07	0.0656149	0.43	0.33	0.00442453
Hdlbp	1.40855e-07	0.0649066	0.326	0.236	0.00248496
Gga3	7.00367e-07	0.0648811	0.206	0.139	0.0122809
Ubc	1.10233e-06	0.0647931	0.574	0.464	0.0192808
AI413582	2.4498e-07	0.0647454	0.512	0.409	0.00431386
Fam96a	5.57193e-07	0.0641755	0.263	0.187	0.00977929
Zc3h4	2.33126e-06	0.0641239	0.205	0.142	0.040585
Usp51	1.3296e-07	0.0641032	0.166	0.102	0.00234675
Zmat4	1.1489e-06	0.0640826	0.322	0.237	0.0200932
Hsd17b10	8.39498e-07	0.0639816	0.17	0.109	0.0147097
Prelid1	8.85948e-07	0.0638431	0.391	0.299	0.0155174
Rcan3	1.97081e-06	0.0635706	0.313	0.235	0.0343552
Higd2a	9.04429e-07	0.0635361	0.526	0.428	0.0158393
Baiap2	2.31897e-06	0.0635141	0.302	0.225	0.0403733
Cd59a	6.40263e-08	0.063507	0.149	0.089	0.00113269
5031439G07Rik	3.52341e-08	0.0633929	0.314	0.224	0.000624384
Mageh1	5.4579e-10	0.0633742	0.304	0.204	9.74071e-06
Ppp1cc	1.84045e-06	0.0632812	0.382	0.294	0.0320974
Arxes1	4.41943e-08	0.0631477	0.318	0.226	0.000782725
Vdac3	1.23027e-06	0.0630897	0.536	0.441	0.0215113
Dcaf5	2.14294e-07	0.0629793	0.336	0.248	0.003775
Eif4h	1.23812e-06	0.0629405	0.624	0.512	0.0216449
Cep120	1.36596e-06	0.0627879	0.272	0.196	0.0238606
Cep170b	2.61778e-07	0.0627713	0.479	0.371	0.00460808
Foxk1	9.61565e-07	0.0627397	0.121	0.072	0.0168322
Cct8	2.00246e-08	0.0626155	0.478	0.362	0.000355397
Ap4s1	6.21135e-08	0.0624951	0.298	0.209	0.00109904
Rbck1	6.66853e-07	0.0624807	0.28	0.202	0.0116953
Peli1	8.82032e-07	0.0623643	0.367	0.269	0.0154514
Mmd2	8.25202e-07	0.0623476	0.142	0.087	0.01446
Dr1	2.30251e-06	0.0619174	0.21	0.146	0.0400912
Actn1	4.31239e-07	0.0617565	0.219	0.148	0.0075786
Lamtor1	1.60167e-07	0.0617038	0.52	0.409	0.00282455
Mkrn1	6.18043e-09	0.0616545	0.355	0.253	0.000109968
Blmh	1.60588e-06	0.0615839	0.364	0.274	0.028029
Erp29	1.05859e-06	0.0615241	0.7	0.602	0.0185189
Mea1	4.90742e-07	0.0614985	0.383	0.282	0.0086189
Mbtps1	4.89275e-08	0.0614944	0.283	0.197	0.000866359
C1qtnf12	3.08845e-08	0.0609842	0.119	0.063	0.000547458
1700037H04Rik	2.78482e-06	0.0609668	0.374	0.284	0.0484502
Elof1	1.18219e-07	0.0609601	0.549	0.429	0.00208739
Tmem50a	4.01222e-08	0.0607088	0.485	0.376	0.000710724
Tecpr1	2.26969e-06	0.0605495	0.437	0.341	0.0395289
Usp12	2.79238e-06	0.0603006	0.229	0.164	0.048579
C030014I23Rik	1.5753e-06	0.0601415	0.16	0.103	0.0275016
Prickle2	1.281e-06	0.0596049	0.319	0.237	0.0223893
Tunar	1.30984e-07	0.059447	0.155	0.094	0.00231213
Fkbp5	2.80345e-06	0.0591664	0.121	0.073	0.048766
Polr2g	4.67917e-07	0.0589334	0.441	0.339	0.0082199
Ldah	1.82284e-06	0.0589231	0.192	0.13	0.0317958
Adcy6	6.20019e-07	0.0588148	0.21	0.142	0.010877
Eef1a2	5.49101e-07	0.0585719	0.471	0.36	0.00963782
Tubb2b	9.05087e-07	0.0582244	0.259	0.185	0.0158499
Ppfia4	2.06399e-06	0.0577455	0.313	0.233	0.0359671
Tmem29	3.04328e-07	0.0575993	0.403	0.309	0.00535496
Zfp811	8.47193e-07	0.0573057	0.208	0.141	0.0148437
Gm5617	2.65332e-06	0.0572474	0.13	0.079	0.0461704
Mydgf	1.01343e-06	0.057135	0.254	0.177	0.0177309
Nfkbia	2.0088e-06	0.0566374	0.132	0.081	0.0350133
Lbhd2	1.12168e-06	0.0565159	0.131	0.08	0.0196182
Trappc11	1.76819e-06	0.056451	0.178	0.118	0.0308478
Jkamp	4.00161e-07	0.0560231	0.412	0.315	0.00703482
Snx17	9.66005e-08	0.0558838	0.283	0.199	0.00170712
Gpr173	9.04686e-09	0.0558555	0.118	0.062	0.000160871
Spcs1	5.84102e-08	0.0557785	0.473	0.366	0.00103368
L1cam	2.02955e-06	0.055625	0.617	0.511	0.035371
Cnih1	8.68908e-07	0.0555522	0.488	0.382	0.0152224
H13	2.79822e-08	0.0554609	0.436	0.326	0.000496264
Tspan6	9.41348e-10	0.0553953	0.289	0.193	1.67889e-05
Sod1	1.70512e-06	0.0550282	0.501	0.399	0.0297544
Gpr27	2.66866e-08	0.0548108	0.28	0.191	0.000473367
Vegfb	5.27906e-07	0.0547392	0.468	0.359	0.00926845
Pithd1	9.99713e-07	0.0546388	0.425	0.332	0.017494
Stk32c	4.51089e-07	0.0545932	0.259	0.181	0.00792563
Naa38	1.54777e-06	0.0543075	0.415	0.319	0.0270272
Armcx2	6.16864e-07	0.0539978	0.35	0.261	0.0108223
Arl2	2.50223e-06	0.053393	0.291	0.212	0.0435513
Ppp1r37	9.77257e-07	0.0526611	0.242	0.171	0.0171059
Foxk2	6.54178e-07	0.0524511	0.231	0.16	0.0114749
Ddit4	2.23558e-06	0.0520309	0.148	0.095	0.0389394
Cdkl2	1.85747e-07	0.0519462	0.34	0.249	0.0032738
Grcc10	3.79375e-07	0.0517774	0.274	0.193	0.00667017
Slc25a51	9.3161e-07	0.051421	0.522	0.414	0.0163134
Chmp1a	2.60291e-06	0.0506556	0.258	0.184	0.0452958
Snhg10	3.53852e-08	0.0503364	0.204	0.129	0.000627026
mt-Nd2	8.93949e-11	0.0503172	0.999	0.995	1.5982e-06
Ubr4	1.24101e-07	0.0500525	0.392	0.29	0.002191
B3galnt1	2.6892e-06	0.0500226	0.379	0.289	0.0467893
Sh3bgrl3	2.30595e-06	0.04984	0.55	0.453	0.0401489
Slc25a19	1.61525e-06	0.0486192	0.184	0.121	0.0281909
Sox2	1.73146e-06	0.0485281	0.304	0.222	0.0302122
Oprl1	1.1811e-06	0.0479614	0.437	0.341	0.0206527
Cyb561	3.07182e-07	0.0476279	0.358	0.266	0.00540486
Edf1	2.27614e-06	0.0475517	0.49	0.385	0.039639
Map2k7	2.54742e-06	0.047201	0.348	0.259	0.0443353
Smarca4	5.95096e-07	0.0462822	0.332	0.242	0.0104416
Pafah1b3	2.08449e-06	0.04623	0.276	0.199	0.0363222
Greb1l	1.55388e-06	0.0459721	0.14	0.087	0.0271323
Dld	1.93481e-06	0.0459633	0.317	0.234	0.0337314
Pard6a	2.7995e-06	0.0456495	0.18	0.12	0.0487
Pam16	2.21886e-08	0.0449466	0.398	0.292	0.000393736
Wrnip1	1.45461e-06	0.0449398	0.25	0.175	0.0254032
Ephb2	1.28861e-06	0.0448026	0.15	0.094	0.0225197
Fktn	1.31577e-06	0.0445029	0.316	0.23	0.0229865
Atp6ap1	1.80915e-06	0.0444464	0.653	0.536	0.0315589
Ifnar1	1.02057e-06	0.0434562	0.178	0.115	0.0178548
Pnma3	1.23182e-06	0.0434319	0.401	0.308	0.0215372
Apoa1	3.82643e-08	0.0434142	0.15	0.088	0.00067789
Arl6ip5	2.10139e-06	0.0433347	0.471	0.371	0.0366125
Cacfd1	5.67644e-07	0.0425517	0.359	0.265	0.00996102
Apoe	1.35539e-06	0.0418425	0.118	0.069	0.0236773
Hist3h2ba	1.05326e-07	0.0408417	0.341	0.242	0.00186048
Atp13a2	1.99956e-06	0.0405608	0.382	0.291	0.0348544
Gm42067	6.49747e-07	0.0397172	0.211	0.141	0.0113979
Arsb	8.83543e-07	0.0393957	0.341	0.251	0.0154761
5330417C22Rik	7.61353e-11	0.0386921	0.326	0.212	1.36138e-06
Trim3	1.38425e-06	0.037829	0.247	0.173	0.0241787
Crocc	8.2256e-07	0.0377275	0.259	0.182	0.0144154
Mapk8ip1	2.02751e-06	0.0368015	0.558	0.449	0.0353375
Seh1l	1.90392e-06	0.0353317	0.192	0.127	0.0331967
Tmem167	4.45138e-07	0.0286527	0.407	0.307	0.00782197
Eif4ebp2	9.92278e-07	0.0285634	0.185	0.12	0.0173649
Miat	5.18461e-07	0.0202795	0.491	0.383	0.00910365
Zmym1	1.57901e-06	0.0120409	0.473	0.367	0.0275632
mt-Co2	1.53409e-09	0.00926778	1	1	2.73467e-05

## Sheet: Vgat_Female_P50FvsP23F
	p_val	avg_logFC	pct.1	pct.2	p_val_adjust
Gm26699	7.05387e-82	0.774123	0.609	0.228	1.24684e-77
mt-Nd3	1.40293e-105	0.669371	0.964	0.873	2.4801e-101
Rsrp1	2.41989e-48	0.555286	0.91	0.752	4.27498e-44
Insig1	1.60098e-25	0.46138	0.337	0.162	2.82285e-21
Prune2	2.09406e-28	0.458269	0.54	0.337	3.69392e-24
Slc24a5	5.4395e-22	0.400632	0.548	0.357	9.58168e-18
Socs2	5.50136e-38	0.399048	0.328	0.116	9.71429e-34
Wsb1	1.19663e-20	0.396639	0.556	0.373	2.10654e-16
Meg3	8.76484e-88	0.389813	0.999	0.999	1.54936e-83
mt-Nd2	3.30845e-60	0.381076	0.996	0.993	5.84669e-56
Scd2	7.68642e-25	0.36618	0.794	0.653	1.35504e-20
Rbm4b	4.88888e-20	0.358295	0.74	0.587	8.6015e-16
mt-Co2	1.79941e-59	0.356261	0.998	1	3.17973e-55
Nop56	5.37511e-17	0.354446	0.57	0.407	9.43923e-13
Scn2b	5.18439e-11	0.34489	0.661	0.545	9.04158e-07
4430402I18Rik	2.9382e-14	0.339412	0.342	0.209	5.14773e-10
Gm26724	5.90454e-19	0.32658	0.261	0.124	1.03843e-14
Rps12	1.7075e-27	0.324636	0.826	0.865	3.01169e-23
Golt1b	3.81673e-17	0.316043	0.333	0.188	6.70371e-13
Ssr1	2.96562e-15	0.314753	0.789	0.674	5.2011e-11
Lnpk	4.27458e-20	0.313066	0.529	0.339	7.52154e-16
Pdzrn4	6.20492e-21	0.313041	0.369	0.204	1.09256e-16
Zscan26	5.77038e-14	0.311726	0.42	0.282	1.01068e-09
Srsf5	2.30013e-20	0.311306	0.79	0.672	4.048e-16
Pcdh15	1.57586e-12	0.308616	0.323	0.202	2.75524e-08
Kdelr2	4.10127e-15	0.30533	0.323	0.189	7.19239e-11
mt-Atp6	1.52373e-31	0.303572	1	1	2.68938e-27
Pnisr	1.68799e-22	0.297205	0.854	0.748	2.97408e-18
Lingo2	1.57447e-14	0.295721	0.518	0.367	2.76021e-10
Marf1	4.04284e-18	0.280603	0.531	0.368	7.1065e-14
Nptn	1.97857e-14	0.278274	0.711	0.58	3.46785e-10
Nktr	3.17868e-16	0.276438	0.742	0.62	5.57891e-12
Tmem35a	3.36809e-09	0.271767	0.312	0.215	5.84532e-05
Ube3a	1.29926e-16	0.2717	0.988	0.97	2.28085e-12
Rbm3	1.31376e-11	0.269881	0.401	0.271	2.29434e-07
Hmgcr	3.60367e-11	0.264064	0.414	0.282	6.28625e-07
Ttc14	1.30308e-12	0.262131	0.764	0.644	2.27883e-08
Lrrc8a	2.3376e-08	0.260207	0.328	0.233	0.000404241
Scg2	8.1298e-09	0.25975	0.892	0.884	0.000140833
Rpl30	4.46719e-23	0.259045	0.835	0.883	7.87164e-19
Paip1	1.06039e-14	0.256888	0.414	0.266	1.85918e-10
Ndufa4	1.83921e-14	0.249611	0.762	0.642	3.22377e-10
Ncam1	4.23714e-10	0.24814	0.974	0.952	7.37474e-06
Rps10	6.96011e-22	0.247567	0.827	0.86	1.22595e-17
Rplp1	6.80982e-30	0.247193	0.944	0.952	1.20159e-25
Wdr89	1.0496e-20	0.247127	0.473	0.282	1.84781e-16
Chpt1	8.24463e-12	0.247114	0.302	0.187	1.44025e-07
Rps27rt	1.71784e-16	0.246944	0.725	0.663	3.0155e-12
Lman2l	2.67621e-11	0.246794	0.473	0.335	4.67079e-07
Tia1	2.24212e-14	0.244812	0.814	0.693	3.92953e-10
Zfp512	2.89377e-14	0.244497	0.471	0.317	5.07017e-10
Acp1	1.1201e-08	0.240516	0.819	0.739	0.000193934
Srsf2	5.15078e-08	0.240327	0.659	0.571	0.000889178
Man2a2	2.41199e-10	0.237939	0.424	0.304	4.2e-06
Edil3	4.09701e-08	0.233549	0.533	0.433	0.000707595
Lrp1b	2.88951e-10	0.233517	0.595	0.473	5.03035e-06
Inpp4a	1.31487e-08	0.232661	0.506	0.405	0.000227591
Stx16	3.93518e-13	0.232213	0.617	0.47	6.88696e-09
Uvssa	8.04934e-13	0.230846	0.212	0.108	1.40831e-08
Rps24	4.47917e-21	0.23059	0.903	0.922	7.88782e-17
Matk	5.19469e-08	0.229979	0.581	0.467	0.000896707
Gabrg2	1.31826e-08	0.229945	0.6	0.489	0.000228164
Rpl5	4.17206e-14	0.229796	0.747	0.718	7.30778e-10
Itm2c	2.2215e-12	0.228533	0.93	0.911	3.8834e-08
Kcnq1ot1	1.70102e-14	0.228201	0.88	0.821	2.98189e-10
Epdr1	2.3131e-11	0.22779	0.442	0.31	4.03752e-07
Yme1l1	3.07063e-11	0.225938	0.513	0.377	5.35764e-07
Unc80	1.39282e-14	0.223191	0.77	0.654	2.44189e-10
mt-Nd4	6.83913e-24	0.220858	0.999	1	1.2054e-19
Spata7	5.88902e-11	0.219778	0.537	0.399	1.02693e-06
Hapln4	1.81616e-09	0.219227	0.263	0.166	3.15449e-05
Rps20	9.13787e-17	0.218364	0.829	0.86	1.60443e-12
Ssbp4	1.56461e-07	0.217646	0.541	0.431	0.00269097
Plxnc1	8.77787e-11	0.217513	0.427	0.298	1.53051e-06
Rpl22l1	2.0751e-19	0.213644	0.918	0.92	3.6501e-15
Taz	1.92664e-09	0.212953	0.451	0.331	3.346e-05
Ly6h	4.68942e-09	0.211808	0.934	0.895	8.13286e-05
Atrx	1.73569e-11	0.21178	0.564	0.43	3.03052e-07
Rpl12	3.00237e-13	0.209335	0.792	0.822	5.25655e-09
Slc16a11	3.84889e-08	0.208973	0.286	0.193	0.000664895
Zfp950	6.72644e-09	0.208396	0.45	0.328	0.000116576
Serpini1	1.56659e-09	0.20829	0.399	0.28	2.72148e-05
Wnk1	6.85411e-14	0.207558	0.521	0.361	1.20036e-09
Frrs1l	8.82511e-13	0.207286	0.65	0.495	1.54378e-08
Sez6l	1.50167e-06	0.20705	0.652	0.574	0.0256259
Chl1	1.86739e-07	0.205209	0.561	0.465	0.00321061
BC005561	3.64472e-08	0.204249	0.521	0.399	0.000629662
Ogt	6.91097e-07	0.203868	0.898	0.86	0.0118323
Snrnp70	5.26933e-12	0.203546	0.875	0.801	9.2071e-08
5330434G04Rik	7.41039e-09	0.202586	0.694	0.568	0.000128385
Gm48855	1.18636e-10	0.202498	0.136	0.061	2.06806e-06
Clcn3	2.28021e-06	0.201818	0.704	0.616	0.0388435
Arglu1	3.2701e-08	0.201675	0.694	0.585	0.000565008
Per3	5.23695e-10	0.201667	0.332	0.216	9.11229e-06
Parm1	9.25902e-08	0.201259	0.269	0.177	0.00159487
Eef2	1.58918e-12	0.200223	0.773	0.716	2.77837e-08
Fut9	2.65406e-07	0.199893	0.515	0.405	0.00455782
Rps15	1.42444e-18	0.199362	0.924	0.941	2.50473e-14
Gm42851	1.35802e-09	0.198566	0.215	0.124	2.35955e-05
Lsamp	1.08276e-09	0.196917	0.872	0.807	1.88205e-05
Srsf11	1.38556e-08	0.196687	0.71	0.602	0.000239772
Lrfn5	1.63648e-08	0.195336	0.699	0.619	0.000283111
Apba1	3.729e-17	0.19399	0.239	0.11	6.54998e-13
Cers4	2.3417e-09	0.192941	0.671	0.572	4.06565e-05
Gria2	3.12645e-11	0.192787	0.971	0.939	5.45472e-07
Grid2	3.67306e-07	0.192671	0.395	0.297	0.00630223
Ankrd12	3.21549e-11	0.192324	0.64	0.519	5.60974e-07
Jam3	7.96568e-10	0.192248	0.312	0.2	1.38523e-05
Rpl8	1.38425e-17	0.192098	0.933	0.933	2.43282e-13
Luc7l2	3.3153e-11	0.191532	0.81	0.726	5.78355e-07
Unc5d	2.54135e-06	0.190895	0.611	0.524	0.0432741
Pnn	6.90091e-08	0.19078	0.581	0.47	0.00118972
Rpl7	3.65751e-14	0.189636	0.822	0.827	6.40685e-10
Fstl5	1.71725e-06	0.188742	0.495	0.398	0.0292894
Ccnt2	4.1889e-07	0.187545	0.706	0.605	0.00718355
Sdc2	5.61062e-07	0.186898	0.311	0.221	0.00961491
Gfra1	9.40065e-07	0.186863	0.278	0.195	0.016077
Vps50	6.01199e-10	0.186326	0.398	0.269	1.04585e-05
Mtdh	1.6951e-07	0.18629	0.508	0.398	0.00291489
Hnrnpdl	1.9058e-07	0.18562	0.575	0.468	0.00327645
Zfp941	2.94234e-12	0.185522	0.31	0.187	5.14263e-08
Kifc2	4.35154e-07	0.185403	0.342	0.247	0.00746158
Nrxn3	3.75378e-20	0.183727	0.958	0.956	6.60589e-16
Zfp112	5.84868e-08	0.183642	0.233	0.148	0.00100901
Cadm1	5.85659e-10	0.182813	0.868	0.831	1.01893e-05
Cacna2d1	3.9281e-08	0.182196	0.243	0.153	0.000678539
Chuk	1.54895e-10	0.181657	0.357	0.236	2.69905e-06
Mcfd2	4.22296e-09	0.180903	0.424	0.302	7.32641e-05
Sltm	7.59719e-07	0.179976	0.518	0.413	0.0130026
Bhlhe41	2.55812e-07	0.179414	0.271	0.186	0.00439357
Il1rap	8.49744e-09	0.17941	0.175	0.097	0.000147167
Rps8	3.7127e-16	0.178354	0.964	0.951	6.51578e-12
R3hdm1	5.25328e-08	0.177389	0.694	0.601	0.000906768
Dbn1	5.32548e-08	0.175876	0.406	0.296	0.000919178
Ccdc39	3.92037e-10	0.175464	0.176	0.09	6.82418e-06
Esf1	1.9484e-06	0.174987	0.287	0.204	0.0332144
Msmo1	2.0252e-10	0.174194	0.367	0.244	3.52769e-06
Kmt2d	4.5255e-07	0.172778	0.256	0.173	0.00775943
Rpl23a	1.95585e-15	0.171371	0.943	0.952	3.43076e-11
Endod1	1.48598e-07	0.17134	0.413	0.311	0.00255647
Nae1	2.79484e-09	0.171162	0.285	0.179	4.85101e-05
Smc5	5.74739e-09	0.170851	0.269	0.168	9.9631e-05
Rcn1	1.40128e-07	0.170538	0.25	0.162	0.00241146
Rock1	1.00802e-07	0.1698	0.215	0.132	0.00173572
Mpc2	2.42987e-08	0.169064	0.332	0.225	0.000420149
M6pr	8.46488e-09	0.168991	0.377	0.26	0.00014662
Zfp263	2.42699e-10	0.168332	0.179	0.092	4.22587e-06
Tcp1	6.89011e-09	0.168114	0.565	0.451	0.000119406
Adgrb3	1.22632e-06	0.168096	0.577	0.473	0.0209505
Ppip5k1	1.96548e-07	0.167854	0.337	0.236	0.00337847
Srrm1	1.70746e-07	0.167775	0.646	0.549	0.00293597
Ccdc66	3.33961e-09	0.167293	0.191	0.107	5.79622e-05
4833420G17Rik	1.04314e-07	0.167014	0.265	0.174	0.00179587
Dbpht2	1.59339e-07	0.166928	0.495	0.385	0.00274032
Gabarapl2	1.40979e-07	0.166692	0.698	0.596	0.00242596
Pcyox1	1.42835e-06	0.165693	0.447	0.341	0.0243805
Nrip1	4.83137e-09	0.165651	0.212	0.126	8.37856e-05
Slf1	2.46391e-09	0.165624	0.286	0.178	4.27759e-05
Cds2	6.42316e-08	0.165302	0.808	0.699	0.00110774
Ddhd2	4.60285e-09	0.16418	0.45	0.326	7.98457e-05
Mga	9.98957e-08	0.163957	0.448	0.337	0.0017202
Tmx3	1.33795e-06	0.163658	0.415	0.312	0.0228455
Sccpdh	5.21041e-07	0.163327	0.408	0.307	0.00893065
mt-Nd1	1.76376e-06	0.162204	0.999	1	0.0300774
Eml5	1.3423e-08	0.161761	0.358	0.244	0.000232312
Usp40	1.08705e-06	0.161303	0.315	0.222	0.0185776
Lrrc45	1.70366e-06	0.16119	0.277	0.192	0.0290594
Plppr4	5.43422e-08	0.160785	0.677	0.568	0.000937838
Ubn2	4.79088e-07	0.160294	0.615	0.508	0.00821348
Rps25	2.7244e-11	0.160229	0.882	0.92	4.75462e-07
Actl6a	8.49378e-09	0.160037	0.263	0.164	0.000147112
Tmem9b	8.89464e-07	0.159515	0.37	0.274	0.0152152
Rpsa	7.16299e-09	0.158637	0.83	0.859	0.000124113
Rpl21	8.69354e-13	0.157917	0.942	0.945	1.52085e-08
Clasrp	9.6147e-08	0.156717	0.293	0.2	0.00165575
Tsix	3.93099e-07	0.155935	0.183	0.11	0.00674323
Lrp11	3.95838e-07	0.15566	0.401	0.294	0.0067898
Eef1a1	3.44988e-09	0.155251	0.939	0.95	5.98692e-05
Atg16l2	1.64888e-06	0.153967	0.168	0.102	0.0281332
Cspp1	1.22469e-06	0.15321	0.442	0.334	0.0209238
Sorbs2	3.73156e-07	0.152929	0.388	0.278	0.00640186
Zfp942	2.6754e-10	0.152891	0.179	0.092	4.65787e-06
2410089E03Rik	1.70018e-06	0.152663	0.402	0.304	0.0290034
Astn1	4.07342e-07	0.151858	0.709	0.624	0.00698673
Yod1	3.96853e-11	0.151761	0.226	0.123	6.92191e-07
Sf3b1	1.41013e-06	0.151431	0.6	0.491	0.0240723
Entpd5	4.55888e-08	0.151295	0.128	0.064	0.00078709
Tmem161b	5.85118e-09	0.151267	0.133	0.064	0.000101424
Nemf	2.25882e-08	0.15073	0.36	0.245	0.000390664
Amy1	9.77311e-07	0.150723	0.208	0.133	0.0167091
Rpl19	7.72e-10	0.150353	0.905	0.92	1.34266e-05
Atp13a3	7.15085e-11	0.148821	0.287	0.173	1.24689e-06
Ppp1r16b	5.26427e-09	0.148243	0.178	0.097	9.12877e-05
Lrrtm2	5.72402e-08	0.147896	0.334	0.229	0.000987623
Ccdc88a	9.31252e-07	0.147569	0.569	0.461	0.0159281
Stx3	1.51058e-07	0.14755	0.237	0.151	0.00259864
Mirg	1.10668e-06	0.146539	0.471	0.365	0.018912
Rnf138	7.1641e-08	0.146384	0.215	0.13	0.0012348
Kmt2a	1.76779e-06	0.146269	0.541	0.44	0.0301444
Ldlr	1.31963e-12	0.145219	0.15	0.064	2.30764e-08
Slc38a9	1.90072e-06	0.144208	0.349	0.255	0.0324034
Rps17	4.20517e-10	0.143307	0.848	0.881	7.31952e-06
Srebf2	7.07487e-09	0.143066	0.476	0.346	0.0001226
Snhg11	4.05438e-23	0.141344	0.997	1	7.14462e-19
Tra2b	7.6941e-07	0.140368	0.643	0.53	0.0131669
Slc39a1	9.26197e-08	0.139622	0.121	0.061	0.00159528
Qsox2	3.0058e-08	0.138567	0.155	0.083	0.000519492
Ythdc2	5.86817e-07	0.137048	0.256	0.17	0.0100539
Tbce	2.34015e-06	0.136374	0.325	0.233	0.0398597
Tle2	5.14846e-07	0.134543	0.141	0.078	0.00882548
Mfn1	1.33208e-06	0.134053	0.247	0.165	0.022748
Dlg1	4.60953e-07	0.133893	0.328	0.23	0.00790303
Nup98	7.49737e-07	0.13386	0.222	0.143	0.0128332
Ndufs1	3.65369e-07	0.133603	0.276	0.185	0.00626937
Ftx	9.76462e-07	0.131729	0.188	0.117	0.0166956
Rgs11	1.35228e-06	0.130922	0.148	0.087	0.0230888
Hook1	1.3236e-06	0.130742	0.423	0.318	0.0226045
Luc7l3	2.87598e-06	0.130231	0.743	0.658	0.0489464
Pgr	1.98955e-07	0.129943	0.328	0.231	0.00341963
Arsb	6.58192e-07	0.127617	0.319	0.223	0.0112722
Carmil1	3.69618e-07	0.127467	0.135	0.074	0.00634154
Ide	4.73798e-08	0.127422	0.212	0.127	0.000817965
Thoc2	1.03143e-06	0.126608	0.45	0.337	0.0176312
Rpl27a	9.3509e-10	0.125733	0.945	0.947	1.62575e-05
Cabin1	6.07401e-08	0.125585	0.319	0.209	0.00104777
Nfrkb	8.40843e-07	0.125103	0.151	0.088	0.0143851
Rpl4	4.26769e-08	0.124514	0.848	0.88	0.000736987
Cyb5b	1.25816e-06	0.124328	0.401	0.295	0.0214894
Blzf1	2.48283e-08	0.1231	0.181	0.102	0.000429256
Arid4a	2.48739e-06	0.121187	0.516	0.403	0.0423652
Chst11	1.18039e-06	0.121099	0.197	0.125	0.0201693
Mical2	3.05611e-08	0.120876	0.171	0.094	0.000528158
Ric1	4.11848e-07	0.120213	0.122	0.064	0.00706319
Slitrk3	6.15436e-08	0.120129	0.153	0.083	0.0010615
Fhad1	9.55765e-10	0.11993	0.206	0.113	1.6615e-05
Nfu1	9.19569e-07	0.119664	0.256	0.167	0.0157292
Cep192	9.82184e-07	0.119193	0.14	0.078	0.0167914
Rpl26	1.67012e-08	0.118418	0.917	0.935	0.000288914
Naaa	3.08365e-07	0.117841	0.18	0.106	0.0052934
Rrn3	5.96475e-07	0.117523	0.346	0.244	0.0102188
Sh3glb1	2.5093e-06	0.116207	0.265	0.177	0.0427359
Tmem267	6.54506e-08	0.115942	0.156	0.086	0.0011287
Prpf39	2.17193e-06	0.114415	0.278	0.192	0.0370119
9930021J03Rik	1.70164e-06	0.113241	0.319	0.225	0.0290265
Gm45159	2.0544e-06	0.11244	0.169	0.101	0.0350131
Txndc9	3.46021e-07	0.11244	0.305	0.206	0.00593876
Ado	2.97861e-07	0.112047	0.116	0.059	0.00511368
Magi3	7.47811e-08	0.111711	0.212	0.127	0.0012887
Rps11	2.04658e-06	0.11132	0.891	0.926	0.0348819
Pmm2	7.0958e-08	0.111129	0.143	0.075	0.00122317
Dusp18	2.58801e-08	0.109688	0.147	0.075	0.000447364
Trim28	3.84634e-07	0.109018	0.226	0.142	0.00659839
Acsl1	7.08126e-07	0.108524	0.236	0.152	0.0121231
E130307A14Rik	5.99441e-07	0.108488	0.251	0.164	0.010269
Ssh1	1.24587e-06	0.106892	0.256	0.167	0.0212807
Rpl9-ps6	7.92879e-07	0.10671	0.296	0.201	0.013567
Zmym6	9.8913e-07	0.106504	0.11	0.056	0.0169092
Rpl23	1.45812e-07	0.105201	0.904	0.933	0.00250884
Tmem237	2.45828e-07	0.103948	0.25	0.161	0.00422283
D17H6S53E	1.73443e-06	0.103858	0.129	0.072	0.029579
Gm10073	2.72372e-07	0.103334	0.152	0.085	0.0046769
Rpl36a-ps1	4.50103e-10	0.0990641	0.189	0.098	7.83225e-06
Syne2	6.82091e-07	0.0989434	0.147	0.082	0.0116788
Ikzf2	2.32243e-07	0.0975086	0.126	0.065	0.00399016
Rpl17	5.71458e-07	0.0961898	0.954	0.951	0.00979193
Pnpt1	1.88055e-06	0.0949738	0.127	0.07	0.0320634
Pgm3	9.64926e-07	0.0925031	0.111	0.056	0.0164993
Plgrkt	5.17602e-07	0.0918913	0.153	0.086	0.00887222
4931406C07Rik	2.60664e-06	0.0889042	0.124	0.068	0.044378
Zbtb21	9.5005e-07	0.0839863	0.117	0.061	0.0162459
Mrpl32	2.89397e-07	0.0797919	0.286	0.187	0.00496894
Anxa7	2.9111e-06	0.0758983	0.262	0.176	0.0495382
2010005H15Rik	2.46039e-07	0.0671966	0.17	0.095	0.00422622

## Sheet: Vgat_Female_P50FvsP35F
	p_val	avg_logFC	pct.1	pct.2	p_val_adjust
Gm26699	4.73734e-30	0.532883	0.609	0.431	8.47558e-26
Gm47283	4.86574e-16	0.403247	0.484	0.363	8.67707e-12
AC149090.1	2.79974e-18	0.398336	0.762	0.699	4.99978e-14
Tmem243	3.40732e-07	0.324523	0.394	0.325	0.00597372
Nop56	1.76145e-10	0.323226	0.57	0.493	3.12129e-06
Slc24a5	2.23222e-10	0.322484	0.548	0.461	3.95459e-06
Ube3a	3.07181e-22	0.312362	0.988	0.985	5.49209e-18
Socs2	3.07951e-16	0.305693	0.328	0.205	5.49261e-12
Wsb1	2.77214e-07	0.305223	0.556	0.492	0.00486427
Ogt	4.86489e-16	0.296157	0.898	0.883	8.67605e-12
Acp1	8.46806e-09	0.292237	0.819	0.79	0.000149436
Meg3	5.68296e-52	0.285484	0.999	0.998	1.01691e-47
Rbm4b	5.48964e-08	0.279839	0.74	0.719	0.000966506
Fus	4.30106e-11	0.271129	0.827	0.818	7.63137e-07
Lingo2	1.0916e-09	0.263582	0.518	0.44	1.93038e-05
Chpt1	2.07294e-06	0.237888	0.302	0.236	0.0361624
Ly6h	1.41017e-09	0.228699	0.934	0.935	2.49303e-05
Pnn	2.5388e-07	0.224891	0.581	0.522	0.0044561
Igf2bp3	2.20175e-07	0.220605	0.736	0.702	0.00386649
Gm16105	2.02554e-09	0.216455	0.166	0.094	3.57954e-05
Lrfn5	5.22463e-07	0.21599	0.699	0.683	0.00914938
R3hdm1	6.4893e-09	0.213952	0.694	0.657	0.000114556
Gm48855	7.30464e-08	0.199856	0.136	0.077	0.0012854
Snhg11	1.60254e-50	0.199036	0.997	0.998	2.86742e-46
Nktr	2.32884e-07	0.197515	0.742	0.737	0.00408874
Tia1	4.31198e-07	0.196863	0.814	0.81	0.00755416
Nrip1	3.68245e-09	0.192202	0.212	0.133	6.50468e-05
Malat1	8.62143e-09	0.190799	0.998	0.999	0.000152117
Snrnp70	5.77934e-12	0.189503	0.875	0.873	1.02658e-07
Pnisr	9.1522e-10	0.186722	0.854	0.861	1.61911e-05
Gria2	9.9171e-11	0.186558	0.971	0.969	1.7583e-06
Ncam1	1.82271e-06	0.186524	0.974	0.98	0.031808
Galnt14	1.2856e-08	0.178031	0.176	0.104	0.000226703
Luc7l2	7.34489e-07	0.148579	0.81	0.809	0.0128506
Ide	5.21971e-07	0.146494	0.212	0.144	0.00914128
Rbm39	2.90028e-10	0.145714	0.925	0.932	5.13581e-06
H3f3b	9.67532e-07	0.141693	0.805	0.853	0.0169125
Nrxn3	2.22725e-06	0.0933397	0.958	0.982	0.0388433

## Sheet: Vgat_Female_P50FvsOVX
	p_val	avg_logFC	pct.1	pct.2	p_val_adjust
Socs2	2.11511e-70	0.512605	0.328	0.078	3.77124e-66
Fgfr1	3.6712e-11	0.458674	0.384	0.29	6.5329e-07
Pdzrn4	1.38168e-29	0.380214	0.369	0.197	2.46313e-25
Scg2	3.97133e-22	0.357176	0.892	0.841	7.07889e-18
Zbtb20	2.51131e-18	0.342297	0.74	0.656	4.47491e-14
Meg3	1.38351e-54	0.293419	0.999	0.997	2.46652e-50
Pgr	2.50308e-20	0.288524	0.328	0.188	4.46123e-16
Tmem35a	4.49742e-11	0.287443	0.312	0.213	8.0018e-07
mt-Nd3	2.35914e-29	0.279728	0.964	0.926	4.20541e-25
Olfm3	4.51658e-11	0.276973	0.337	0.235	8.03546e-07
Nop56	1.19365e-13	0.275207	0.57	0.435	2.12541e-09
Tmcc3	2.98918e-12	0.261913	0.432	0.329	5.32133e-08
Id4	4.04479e-10	0.260679	0.346	0.249	7.19082e-06
Hpcal1	1.83559e-13	0.239657	0.427	0.306	3.26827e-09
Gabre	4.77177e-11	0.230788	0.335	0.229	8.48899e-07
Gm26699	2.62304e-11	0.229938	0.609	0.478	4.66822e-07
Ogt	2.37068e-13	0.225285	0.898	0.843	4.22076e-09
Itm2c	1.47906e-14	0.222037	0.93	0.903	2.63481e-10
Nrip1	1.30767e-18	0.218937	0.212	0.099	2.33027e-14
Maged1	2.23202e-14	0.218737	0.828	0.743	3.975e-10
Sez6l	7.85353e-09	0.218338	0.652	0.569	0.000139455
Enah	1.70775e-07	0.215643	0.695	0.627	0.00302682
Rprm	6.61369e-09	0.215463	0.192	0.119	0.000117446
Grik1	8.18296e-09	0.215211	0.27	0.184	0.000145297
Kcns2	1.91119e-14	0.211988	0.179	0.086	3.40402e-10
Hspa5	9.78387e-11	0.208868	0.601	0.486	1.74016e-06
H3f3b	1.53334e-14	0.205017	0.805	0.743	2.73134e-10
Ly6h	1.0719e-10	0.202854	0.934	0.871	1.90637e-06
Apoc3	5.62081e-20	0.19672	0.189	0.076	1.00174e-15
Sccpdh	4.14458e-12	0.190986	0.408	0.289	7.37777e-08
Scn9a	4.11417e-11	0.190008	0.484	0.362	7.32034e-07
Neo1	5.99547e-09	0.188762	0.305	0.214	0.000106474
Gm1673	5.66319e-11	0.185848	0.825	0.747	1.00737e-06
Hsph1	1.00158e-08	0.181654	0.577	0.487	0.000177811
Chpt1	2.29586e-08	0.176985	0.302	0.216	0.000407424
Manf	2.85224e-09	0.175226	0.385	0.276	5.06786e-05
Nos1ap	1.46498e-10	0.171152	0.373	0.262	2.60517e-06
Maf	3.08871e-19	0.165743	0.102	0.025	5.50439e-15
Nrp1	1.49596e-08	0.164698	0.261	0.175	0.000265533
Rmst	4.89568e-11	0.163718	0.495	0.362	8.70892e-07
Npdc1	7.67658e-07	0.159651	0.619	0.528	0.0135868
Bax	1.37728e-07	0.158343	0.363	0.271	0.00244164
Stk19	1.39498e-06	0.155278	0.309	0.23	0.0246729
Eif1b	2.69375e-07	0.155104	0.676	0.631	0.00477359
Prrt1	9.41884e-07	0.154493	0.387	0.305	0.0166666
Pak7	1.19243e-08	0.153449	0.336	0.239	0.00021168
Srsf5	1.57748e-06	0.150953	0.79	0.72	0.027893
Rbm39	5.06075e-12	0.146416	0.925	0.862	9.00813e-08
Lman2l	6.43501e-07	0.14523	0.473	0.372	0.0113906
Hs3st5	5.09675e-08	0.144921	0.161	0.095	0.000904062
Ptpn5	5.33979e-07	0.140943	0.509	0.415	0.00945463
Eif1	2.65055e-11	0.140636	0.889	0.876	4.71693e-07
Mat2a	1.60398e-07	0.140059	0.691	0.591	0.00284322
Il1rap	1.36301e-07	0.139545	0.175	0.108	0.00241648
Chml	4.53568e-10	0.138603	0.124	0.06	8.06307e-06
Sox2	3.08616e-09	0.137966	0.323	0.222	5.48317e-05
Nrsn1	1.92497e-06	0.135508	0.848	0.809	0.0340295
Trp53i11	2.19108e-06	0.134311	0.256	0.184	0.0387207
Pdia3	2.19853e-06	0.134243	0.426	0.339	0.0388502
Hcn1	4.42438e-07	0.134116	0.359	0.274	0.00783735
Plekhb1	2.5818e-06	0.133636	0.2	0.136	0.0456127
Slc6a11	5.50242e-07	0.13273	0.35	0.264	0.00974203
Galnt14	4.91721e-08	0.132659	0.176	0.106	0.000872264
Actl6a	6.21028e-08	0.131404	0.263	0.177	0.00110152
Hmgn3	3.01914e-07	0.130408	0.625	0.538	0.00534991
H3f3a	1.68466e-07	0.129858	0.536	0.43	0.00298605
Nectin3	1.70081e-06	0.127027	0.167	0.109	0.0300721
Jam3	2.36668e-06	0.125961	0.312	0.232	0.0418169
Mydgf	3.87289e-07	0.125933	0.259	0.177	0.00686159
Gfra1	1.50256e-06	0.124944	0.278	0.199	0.0265697
Syne2	4.84373e-10	0.124919	0.147	0.075	8.61022e-06
Parm1	1.10763e-06	0.124526	0.269	0.191	0.0195952
Mirg	5.0868e-07	0.124191	0.471	0.374	0.00900771
Mbtps1	7.78329e-08	0.124075	0.283	0.197	0.00138029
BC005561	4.93936e-07	0.120605	0.521	0.41	0.00874712
Dgkd	1.48064e-06	0.118699	0.186	0.123	0.0261837
Drp2	1.22408e-07	0.112915	0.155	0.092	0.00217041
Brinp2	6.66957e-07	0.110832	0.306	0.223	0.0118051
Pard3	1.5719e-07	0.110233	0.216	0.142	0.00278651
Idnk	3.25821e-08	0.109382	0.275	0.186	0.000578103
Tmem267	5.27391e-10	0.107691	0.156	0.083	9.37385e-06
Chst11	2.02207e-06	0.107019	0.197	0.133	0.0357422
Ikzf2	2.92818e-08	0.103588	0.126	0.066	0.000519605
Pim3	1.95308e-06	0.102718	0.136	0.082	0.0345246
Kl	2.6077e-06	0.102222	0.109	0.061	0.0460677
mt-Co2	9.52626e-14	0.098626	0.998	1	1.69634e-09
mt-Nd2	2.8866e-10	0.097693	0.996	0.995	5.13237e-06
Akt1s1	5.59793e-07	0.09762	0.219	0.146	0.00991058
Mical2	5.70079e-07	0.0970883	0.171	0.107	0.0100921
Celf3	1.32465e-06	0.0970227	0.532	0.423	0.0234305
Scml4	2.05028e-09	0.0957529	0.124	0.06	3.64315e-05
Gadd45a	5.10808e-09	0.0937289	0.102	0.048	9.07246e-05
Rgma	3.23659e-07	0.0930034	0.125	0.069	0.00573492
Rab40b	4.45701e-08	0.0912643	0.105	0.052	0.000790763
Snhg11	1.14831e-11	0.0879546	0.997	0.998	2.04376e-07
5330417C22Rik	3.54609e-07	0.0876599	0.3	0.212	0.00628296
Tmem107	7.14104e-08	0.0814545	0.212	0.133	0.00126646
Atf6b	1.05083e-06	0.0777514	0.143	0.085	0.0185913
Fsd1	1.47381e-06	0.0688478	0.244	0.168	0.0260643
Foxk1	2.73873e-06	0.0590781	0.124	0.072	0.0483743
mt-Atp6	9.62097e-07	0.0434688	1	1	0.0170233

## Sheet: Vgat_Female_OVXvsP23F
	p_val	avg_logFC	pct.1	pct.2	p_val_adjust
Gm26699	1.93773e-45	0.544184	0.478	0.228	3.454e-41
Insig1	1.54607e-27	0.49664	0.329	0.162	2.75216e-23
Rsrp1	1.06917e-55	0.452979	0.879	0.752	1.90655e-51
Slc24a5	1.23715e-28	0.445559	0.546	0.357	2.2025e-24
Nptn	2.90453e-23	0.423269	0.69	0.58	5.16455e-19
Prune2	2.01274e-26	0.392707	0.509	0.337	3.58147e-22
mt-Nd3	9.0457e-39	0.389643	0.926	0.873	1.61176e-34
Cadm2	6.17499e-12	0.342832	0.485	0.382	1.08927e-07
Scn2b	2.86466e-13	0.337135	0.644	0.545	5.06387e-09
Gabra1	2.23571e-07	0.326347	0.611	0.551	0.00388856
Gabrg2	1.81466e-16	0.316255	0.612	0.489	3.21666e-12
Wsb1	1.75686e-16	0.315485	0.511	0.373	3.11456e-12
Frrs1l	1.73177e-22	0.307006	0.65	0.495	3.07857e-18
Paip1	2.91158e-19	0.30694	0.414	0.266	5.17126e-15
Rplp1	9.79756e-51	0.306848	0.94	0.952	1.74671e-46
Zscan26	3.36219e-15	0.297532	0.407	0.282	5.9541e-11
mt-Nd2	2.55263e-27	0.283383	0.995	0.993	4.54367e-23
Edil3	4.72264e-08	0.282734	0.507	0.433	0.000824526
Fut9	1.52466e-08	0.277237	0.494	0.405	0.000266784
Marf1	3.18698e-14	0.276035	0.482	0.368	5.63935e-10
Scn1a	2.58674e-06	0.268549	0.365	0.295	0.0446834
Dpp10	2.02947e-08	0.265799	0.48	0.399	0.000354893
Ttc14	3.46202e-11	0.261641	0.732	0.644	6.10008e-07
Lrrc8a	2.48641e-08	0.261353	0.316	0.233	0.0004347
mt-Atp6	2.32647e-12	0.260104	1	1	4.10809e-08
mt-Co2	2.20378e-20	0.257635	1	1	3.91589e-16
Rps10	8.56143e-25	0.257039	0.815	0.86	1.52291e-20
Kdelr2	1.14177e-08	0.255909	0.273	0.189	0.000199902
Yme1l1	1.70105e-12	0.255557	0.497	0.377	3.00405e-08
Slc24a2	2.96568e-07	0.254541	0.365	0.292	0.00515583
Rpl30	6.46376e-24	0.250831	0.83	0.883	1.14958e-19
Rps12	7.36762e-24	0.249492	0.815	0.865	1.31026e-19
Rpl12	5.34878e-18	0.24488	0.783	0.822	9.49195e-14
Rpl8	4.10003e-28	0.239765	0.928	0.933	7.29888e-24
Rpl7	3.07686e-23	0.239127	0.823	0.827	5.47066e-19
Lnpep	5.774e-10	0.238551	0.561	0.458	1.01455e-05
Rps15	9.31676e-34	0.237768	0.938	0.941	1.65959e-29
Pnisr	2.55685e-12	0.237268	0.806	0.748	4.51387e-08
Epdr1	7.6254e-11	0.236858	0.42	0.31	1.34268e-06
Slitrk4	5.16429e-08	0.236594	0.325	0.246	0.000901531
Tsix	1.10099e-08	0.232365	0.183	0.11	0.000192773
Tfrc	8.56031e-13	0.232043	0.241	0.14	1.51201e-08
Msmo1	7.11548e-10	0.231536	0.343	0.244	1.25012e-05
Apba1	1.25135e-23	0.230123	0.25	0.11	2.22527e-19
Rps20	9.67963e-22	0.229255	0.822	0.86	1.72056e-17
Clcn3	1.33676e-10	0.227973	0.7	0.616	2.35296e-06
Rbm4b	7.83389e-09	0.227496	0.669	0.587	0.000137234
Lnpk	1.25398e-08	0.226195	0.439	0.339	0.000219484
Nktr	5.55807e-12	0.22594	0.704	0.62	9.80611e-08
4430402I18Rik	6.41796e-09	0.225522	0.3	0.209	0.000112468
Ankrd12	5.32062e-16	0.224904	0.636	0.519	9.42973e-12
Rab3c	3.02188e-08	0.222372	0.647	0.598	0.000528074
Scd2	8.4608e-11	0.219512	0.718	0.653	1.48952e-06
Cplx1	7.47234e-07	0.216431	0.351	0.269	0.0129533
Luc7l2	1.04432e-10	0.215422	0.787	0.726	1.83842e-06
Vps50	5.21985e-09	0.214973	0.367	0.269	9.14987e-05
Dhcr24	5.82573e-09	0.213325	0.252	0.168	0.000102108
Cntn1	8.03928e-09	0.212286	0.805	0.751	0.000140824
mt-Nd4	1.44481e-10	0.209904	0.999	1	2.54286e-06
Lsamp	2.9381e-13	0.209035	0.841	0.807	5.19339e-09
Golt1b	1.03959e-07	0.207184	0.268	0.188	0.00181222
Rps24	6.24004e-19	0.206503	0.892	0.922	1.10798e-14
Hook1	2.04529e-09	0.206327	0.419	0.318	3.58846e-05
Opcml	3.32272e-08	0.204677	0.685	0.615	0.000580545
Gria2	1.15994e-11	0.204638	0.965	0.939	2.04544e-07
Inpp4a	1.8542e-07	0.198246	0.48	0.405	0.00322706
Bhlhe41	9.04026e-07	0.194856	0.256	0.186	0.0156614
Rps17	3.22616e-18	0.19344	0.857	0.881	5.72578e-14
Serpini1	1.054e-07	0.193093	0.369	0.28	0.00183722
Cask	4.09109e-08	0.192516	0.416	0.324	0.000714427
Pcdh9	1.22956e-07	0.192431	0.53	0.456	0.00214239
mt-Nd5	1.9224e-08	0.192014	0.882	0.862	0.000336209
Gm26724	1.2221e-08	0.191722	0.201	0.124	0.000213928
Matk	2.03663e-07	0.190857	0.557	0.467	0.00354312
2610507B11Rik	2.32843e-09	0.190062	0.356	0.258	4.08429e-05
Rps8	3.79081e-20	0.187429	0.947	0.951	6.73514e-16
Ssr1	7.16665e-08	0.187332	0.732	0.674	0.00125022
Ldlr	1.61421e-15	0.186343	0.154	0.064	2.85973e-11
Guf1	1.03829e-06	0.186335	0.349	0.266	0.0179781
Megf9	5.48031e-07	0.185327	0.305	0.228	0.00951217
Ndufa4	1.6347e-08	0.182997	0.701	0.642	0.00028599
Grid2	2.40084e-07	0.180465	0.384	0.297	0.00417553
Rbm3	7.65317e-08	0.180457	0.361	0.271	0.00133487
Stx16	1.69917e-07	0.177535	0.557	0.47	0.00295757
Rpl22l1	2.19711e-15	0.177466	0.928	0.92	3.89196e-11
Rpl21	2.89621e-17	0.177037	0.927	0.945	5.13642e-13
Wdr89	2.3708e-10	0.176478	0.394	0.282	4.17072e-06
Rpl5	1.28105e-08	0.175492	0.711	0.718	0.000224209
Tmem161b	2.80912e-11	0.174703	0.138	0.064	4.95108e-07
Uvssa	7.31324e-07	0.173666	0.17	0.108	0.0126797
Rpl19	6.45574e-14	0.171616	0.903	0.92	1.14209e-09
Nrxn3	2.69952e-18	0.16913	0.959	0.956	4.79219e-14
Unc80	3.51721e-07	0.166906	0.709	0.654	0.00611185
Zfp941	1.90477e-10	0.166405	0.288	0.187	3.35144e-06
Tcp1	7.71967e-08	0.1656	0.534	0.451	0.00134639
Rps25	1.12914e-13	0.163052	0.898	0.92	1.99712e-09
Fam213b	3.80796e-07	0.162789	0.463	0.383	0.00661557
Ube3a	6.87328e-12	0.16262	0.987	0.97	1.21231e-07
Chrm2	8.47308e-09	0.161438	0.103	0.049	0.000148397
Slc39a1	2.26463e-06	0.161317	0.109	0.061	0.0391327
Slitrk3	2.42297e-11	0.161215	0.162	0.083	4.27097e-07
Srsf5	4.33597e-07	0.160353	0.72	0.672	0.00753115
Zbtb38	1.57674e-06	0.157934	0.322	0.243	0.0272729
Rpl32	1.38315e-13	0.157886	0.912	0.92	2.44611e-09
Kmt2a	2.14435e-06	0.156683	0.519	0.44	0.0370609
Luc7l3	3.38515e-07	0.156452	0.734	0.658	0.00588306
Nudc	4.42158e-07	0.156052	0.56	0.486	0.00767852
Tmx4	5.11895e-09	0.155559	0.899	0.864	8.97352e-05
Fau	4.91189e-15	0.154134	0.939	0.941	8.69699e-11
Dgke	4.37152e-07	0.153136	0.312	0.228	0.00759246
Nrxn1	6.6052e-07	0.150753	0.83	0.775	0.0114554
Slc12a5	8.88937e-07	0.147331	0.812	0.745	0.0154008
Gpr26	2.10195e-09	0.146227	0.129	0.064	3.68765e-05
Rpsa	1.9279e-08	0.145506	0.811	0.859	0.000337152
Srebf2	1.87848e-07	0.142794	0.439	0.346	0.00326893
Cyb5b	1.29485e-06	0.142783	0.374	0.295	0.0224099
Yod1	6.19833e-10	0.142423	0.21	0.123	1.08905e-05
Rpl11	3.57594e-11	0.140095	0.909	0.925	6.30044e-07
Rpl27a	4.0439e-13	0.139926	0.934	0.947	7.14638e-09
Rps5	2.40664e-11	0.1399	0.904	0.922	4.24267e-07
Rps11	4.11561e-10	0.13988	0.897	0.926	7.23318e-06
Rpl23a	1.04978e-12	0.136406	0.935	0.952	1.85413e-08
Gm45159	2.52943e-07	0.134165	0.167	0.101	0.00439867
Rps16	1.17307e-08	0.132581	0.869	0.901	0.00020537
Rpl17	3.72951e-13	0.132307	0.945	0.951	6.59154e-09
Tmf1	1.26582e-06	0.131485	0.253	0.178	0.02191
Cav2	2.46128e-10	0.130965	0.112	0.049	4.32939e-06
Cdh8	6.41171e-07	0.129047	0.224	0.151	0.0111211
Rpl9	2.94027e-09	0.12816	0.915	0.936	5.15695e-05
Wapl	1.23706e-07	0.126995	0.287	0.2	0.0021552
Gm10073	1.07816e-09	0.126725	0.158	0.085	1.89314e-05
Stx4a	6.26379e-07	0.125543	0.358	0.271	0.0108671
Rpl23	8.61247e-10	0.120348	0.908	0.933	1.51261e-05
Rps23	2.21744e-07	0.118683	0.929	0.942	0.00385701
Rps3a1	1.70256e-06	0.118385	0.855	0.898	0.0294424
Trmt13	1.2452e-06	0.116415	0.177	0.113	0.0215545
Rpl14	6.74813e-07	0.115828	0.9	0.923	0.0117026
Rps14	2.01699e-06	0.11474	0.92	0.932	0.0348636
Rps27a	1.18394e-07	0.112649	0.931	0.935	0.00206302
Rpl26	6.06234e-09	0.11024	0.917	0.935	0.000106243
Thrb	1.27148e-07	0.104566	0.12	0.064	0.00221491
Malat1	5.88409e-12	0.100188	1	1	1.03807e-07
Rpl24	1.85534e-07	0.0982025	0.915	0.935	0.00322885
Meg3	2.39549e-12	0.0963939	0.997	0.999	4.22948e-08

[truncated: 38 more sheets: Vgat_Female_OVXvsP35F, Vgat_Female_OVXvsP50F, Vgat_male_P23MvsP35M, Vgat_male_P23MvsP50M, Vgat_male_P23MvsCast, Vgat_male_P35MvsP23M, Vgat_male_P35MvsP50M, Vgat_male_P35MvsCast, Vgat_male_P50MvsP23M, Vgat_male_P50MvsP35M, Vgat_male_P50MvsCast, Vgat_male_CastvsP23M, Vgat_male_CastvsP35M, Vgat_male_CastvsP50M, Vglut2_Female_P23FvsP35F, Vglut2_Female_P23FvsP50F, Vglut2_Female_P23FvsOVX, Vglut2_Female_P35FvsP23F, Vglut2_Female_P35FvsP50F, Vglut2_Female_P35FvsOVX …]
