# Supplementary material for: Esr1-dependent signaling and transcriptional maturation in the medial preoptic area of the hypothalamus shape the development of mating behavior during adolescence
Source: eLife. 2026 Jun 19;14:RP106347. doi: 10.7554/eLife.106347 (PMC13282117; doi:10.7554/eLife.106347)
Supplement: Supplementary file 4. [file elife-106347-supp4.xlsx]

## Sheet: P50FvsOVX_Vgat1
	p_val	avg_logFC	pct.1	pct.2	p_val_adjust
Gal	3.88551e-07	0.960299	0.452	0.21	0.00541524
Fgfr1	2.88145e-10	0.898807	0.464	0.178	4.01731e-06
Tmem35a	1.57257e-08	0.786025	0.392	0.142	0.0002192
Socs2	1.58934e-09	0.69041	0.193	0.014	2.21571e-05
Olfm3	7.8484e-08	0.675604	0.494	0.233	0.00109391
Nop56	4.48945e-07	0.593504	0.578	0.311	0.0062565
Kcns2	3.38531e-06	0.590435	0.187	0.041	0.047154
Pdzrn4	9.33459e-07	0.508341	0.283	0.087	0.0130068
Magi3	7.43629e-07	0.487146	0.145	0.014	0.0103625
Tnxb	1.3334e-06	0.480051	0.102	0	0.0185783
Chml	1.41972e-06	0.443498	0.127	0.009	0.0197795
Scg2	1.96073e-06	0.379424	0.964	0.895	0.0273149
Meg3	1.05661e-08	0.294465	1	1	0.000147291
Ly6h	3.35187e-06	0.292905	0.946	0.84	0.0466915

## Sheet: P50FvsOVX_Vgat2
	p_val	avg_logFC	pct.1	pct.2	p_val_adjust
Pdzrn4	5.72695e-17	0.768832	0.867	0.388	8.48676e-13
Nts	2.33499e-08	0.694484	0.687	0.347	0.000345742
Socs2	2.09132e-20	0.67328	0.506	0.024	3.09933e-16
Pgr	1.16135e-15	0.629509	0.916	0.4	1.72077e-11
Sccpdh	4.97282e-11	0.625669	0.795	0.418	7.36723e-07
Zbtb20	1.35484e-07	0.604226	0.916	0.765	0.00200517
Irs4	3.47314e-10	0.524695	0.94	0.782	5.14441e-06
Tmcc3	9.54875e-08	0.511444	0.771	0.494	0.0014135
Pcp4	1.29914e-10	0.508248	1	0.988	1.92455e-06
Meg3	1.0026e-15	0.497748	1	1	1.48565e-11
Tmem158	2.94865e-06	0.495811	0.928	0.629	0.0435781
Hpcal1	2.19163e-07	0.458084	0.819	0.465	0.00324339
Maf	2.23304e-09	0.445	0.325	0.047	3.30713e-05
Nos1ap	1.05937e-07	0.440661	0.614	0.276	0.00156807
Pak3	2.60757e-11	0.437481	1	0.941	3.86338e-07
Ptp4a1	1.5775e-06	0.417182	0.867	0.694	0.0233233
Napb	8.05065e-07	0.399415	0.988	0.988	0.0119077
Parm1	5.46772e-07	0.399322	0.506	0.194	0.0080884
Nos1	1.43696e-06	0.396335	0.627	0.288	0.0212484
Pcdh7	2.37673e-07	0.394801	0.976	0.835	0.00351684
Scg2	2.05948e-06	0.356499	1	0.976	0.0304433
Drp2	1.37089e-06	0.345287	0.482	0.182	0.0202727
Apoc3	6.77793e-10	0.339735	0.301	0.029	1.00388e-05
Eif1b	1.69355e-06	0.329086	0.976	0.9	0.0250375
Hsph1	3.19352e-06	0.313542	0.988	0.818	0.0471939
Pappa	9.83703e-07	0.293326	0.277	0.059	0.014549
Syne2	1.15417e-06	0.278903	0.349	0.088	0.017069
Chml	3.44407e-08	0.278391	0.349	0.071	0.000509928
Nrsn1	1.57503e-06	0.27478	1	0.982	0.0232884
Cpsf2	7.45741e-07	0.265002	0.578	0.218	0.011031
Kit	2.37491e-06	0.26329	0.193	0.024	0.0351012
Lpp	4.38177e-08	0.26188	0.337	0.065	0.000648721
Itm2c	1.89833e-06	0.248708	1	0.994	0.028063
Opn3	8.06222e-08	0.246005	0.217	0.018	0.00119353
Tbc1d30	2.21941e-06	0.237314	0.422	0.141	0.0328051
Gm16485	1.31459e-07	0.227838	0.301	0.053	0.00194572
mt-Co2	1.08232e-08	0.191846	1	1	0.000160269

## Sheet: P50FvsOVX_Vgat3
	p_val	avg_logFC	pct.1	pct.2	p_val_adjust
Meg3	1.15344e-09	0.336505	1	0.994	1.60732e-05

## Sheet: P50FvsOVX_Vgat4
	p_val	avg_logFC	pct.1	pct.2	p_val_adjust
Fgfr1	6.06144e-07	0.899909	0.656	0.428	0.00887273
Tmem35a	6.22621e-18	0.8733	0.52	0.048	9.15689e-14
Socs2	1.16927e-23	0.844153	0.552	0.007	1.72e-19
Pgr	1.18724e-18	0.824772	0.736	0.193	1.74619e-14
Pdzrn4	9.63645e-21	0.78702	0.704	0.138	1.41742e-16
Enah	1.01235e-08	0.703641	0.856	0.6	0.000148552
Olfm3	1.72418e-11	0.623616	0.728	0.331	2.53368e-07
Ptp4a1	3.07202e-14	0.61932	0.904	0.441	4.5171e-10
Sv2c	7.02763e-10	0.615513	0.568	0.2	1.03215e-05
Ecel1	5.30021e-09	0.614081	0.424	0.124	7.77964e-05
Hpcal1	1.17069e-15	0.587236	0.928	0.517	1.72162e-11
Kcns2	1.99434e-15	0.58251	0.56	0.097	2.93268e-11
Htr1b	3.09183e-12	0.568073	0.552	0.131	4.54498e-08
Hcn1	5.81484e-11	0.56716	0.592	0.2	8.54317e-07
Nop56	8.21742e-12	0.565804	0.824	0.407	1.2078e-07
Elmo1	5.45321e-11	0.557543	0.792	0.4	8.01241e-07
Maf	6.54167e-13	0.544926	0.432	0.055	9.61756e-09
Parm1	2.54583e-10	0.541457	0.408	0.076	3.73982e-06
Nrip1	1.60147e-12	0.525952	0.424	0.055	2.35433e-08
Sez6l	9.42286e-12	0.518139	0.944	0.648	1.38488e-07
Atp1b3	2.82672e-07	0.516484	0.68	0.359	0.00413974
Rap1gap	3.40388e-10	0.502445	0.776	0.372	4.99995e-06
Prkce	2.38117e-08	0.491057	0.696	0.359	0.000349222
Sccpdh	1.73585e-09	0.489617	0.648	0.255	2.54892e-05
Zbtb20	6.82779e-12	0.487721	0.992	0.924	1.00362e-07
Brinp2	4.31305e-10	0.481778	0.592	0.207	6.33501e-06
Hmgcs1	6.74118e-09	0.461963	0.664	0.262	9.89403e-05
Scd2	6.51372e-08	0.458485	0.856	0.545	0.000954585
Id4	4.44183e-07	0.453711	0.744	0.407	0.00650328
Scg2	2.76033e-13	0.448196	1	0.986	4.05851e-09
Tmem158	8.31184e-09	0.440456	0.928	0.71	0.000121976
Ctnna2	1.32943e-08	0.438976	0.696	0.297	0.000195067
Kcnk2	8.98913e-07	0.437918	0.728	0.366	0.0131529
Chpt1	3.92221e-08	0.428689	0.424	0.124	0.000575113
Odc1	2.86552e-06	0.427415	0.728	0.455	0.0418882
Hsph1	5.31556e-08	0.421219	0.912	0.614	0.000779208
Gabre	1.60238e-08	0.418373	0.688	0.303	0.000235069
Eif1b	9.51551e-12	0.41276	0.976	0.89	1.3984e-07
Mmd	2.2124e-06	0.40831	0.752	0.448	0.0323454
Maged1	1.44041e-08	0.401009	0.968	0.793	0.000211323
Scml4	2.02611e-11	0.396805	0.36	0.034	2.97717e-07
Pcp4	3.96838e-07	0.396654	1	0.979	0.0058105
H2-Q2	2.51394e-08	0.395201	0.304	0.048	0.000368669
Cntnap2	8.07525e-07	0.394529	0.84	0.579	0.0118173
Pak3	2.11669e-09	0.391911	0.992	0.862	3.10793e-05
Rbbp7	9.37997e-07	0.391315	0.608	0.29	0.0137238
Sytl4	1.4939e-07	0.374825	0.176	0	0.00218842
Tmcc3	9.04808e-08	0.366423	0.952	0.766	0.00132582
Pard3	3.20958e-06	0.365674	0.448	0.172	0.046908
Nexmif	2.13628e-06	0.364852	0.488	0.193	0.0312345
Itm2c	1.83175e-10	0.364726	0.992	0.979	2.69102e-06
Ogfrl1	8.27798e-08	0.363204	0.728	0.352	0.00121306
Ogt	1.73997e-06	0.359484	0.992	0.869	0.0254453
Plcb4	1.13343e-07	0.357192	0.896	0.524	0.00166048
A730046J19Rik	4.2066e-09	0.354826	0.216	0	6.17486e-05
Hs3st5	2.05011e-06	0.354537	0.432	0.152	0.0299767
Ywhah	1.37924e-08	0.352996	0.992	0.897	0.000202362
Apoc3	2.00902e-07	0.348866	0.504	0.166	0.00294261
Mical2	6.27349e-08	0.347556	0.376	0.09	0.000919443
Meg3	1.64549e-08	0.341652	1	1	0.00024136
Slitrk6	2.71592e-08	0.34109	0.264	0.028	0.000398262
Rasd1	3.36496e-07	0.341075	0.232	0.028	0.00492731
Th	2.98547e-06	0.340462	0.328	0.09	0.0436357
Ormdl1	1.52641e-09	0.338913	0.328	0.041	2.24153e-05
Kpnb1	8.23531e-07	0.336873	0.728	0.345	0.0120507
Lrfn5	1.65345e-06	0.333991	0.952	0.703	0.0241817
Msmo1	1.19035e-06	0.327081	0.536	0.221	0.0174136
Chst11	9.5619e-08	0.315819	0.424	0.124	0.00140101
Chml	1.10025e-07	0.301461	0.28	0.041	0.00161198
Acvr2a	1.80358e-07	0.298634	0.44	0.124	0.00264189
Trp53inp1	1.62458e-08	0.297438	0.256	0.021	0.000238309
Tnxb	9.77277e-10	0.295823	0.232	0	1.43523e-05
Naaa	4.33389e-08	0.295066	0.432	0.11	0.000635434
Rps6ka3	4.4117e-08	0.288087	0.208	0.007	0.0006468
Nxn	5.99911e-08	0.286473	0.224	0.014	0.000879289
Srxn1	7.18368e-07	0.280636	0.44	0.145	0.0105133
Pik3r3	6.07689e-07	0.279544	0.416	0.124	0.00889474
Elovl5	5.37714e-07	0.275117	0.328	0.076	0.00787213
Shisa2	1.25748e-06	0.261469	0.28	0.055	0.0183945
Znrf2	2.83082e-06	0.252148	0.336	0.09	0.0413838
Drp2	3.28184e-06	0.243921	0.24	0.041	0.0479608
Gm16485	2.0824e-08	0.240142	0.256	0.021	0.000305426
Mtcl1	1.13943e-06	0.23884	0.24	0.034	0.0166699
Nrp1	1.28419e-06	0.221061	0.208	0.021	0.0187838
Fam189a2	6.04786e-07	0.213296	0.16	0	0.00885347
Me1	1.99671e-06	0.212716	0.296	0.062	0.0291979
mt-Co2	5.00694e-08	0.184002	1	1	0.000734018
Bid	2.96592e-06	0.146011	0.216	0.028	0.0433529

## Sheet: P50FvsOVX_Vgat5
	p_val	avg_logFC	pct.1	pct.2	p_val_adjust
Rpl27-ps3	2.43379e-06	0.310618	0.389	0.092	0.0353264

## Sheet: P50FvsOVX_Vgat6
	p_val	avg_logFC	pct.1	pct.2	p_val_adjust
Socs2	7.74845e-14	1.10269	0.619	0.112	1.08509e-09
Scg2	1.18863e-07	0.755701	0.866	0.684	0.00166444
Gas6	7.44159e-07	0.733036	0.454	0.133	0.010419
Apoc3	2.02199e-07	0.553081	0.299	0.02	0.00283119
mt-Co2	1.54447e-06	0.352037	1	1	0.0216226
mt-Nd4	2.75009e-06	0.316587	1	1	0.0384985

## Sheet: P50FvsOVX_Vgat7
	p_val	avg_logFC	pct.1	pct.2	p_val_adjust
Meg3	1.29237e-10	0.52165	0.99	0.973	1.80402e-06
mt-Atp6	2.18154e-07	0.179996	1	1	0.00304478

## Sheet: P50FvsOVX_Vgat8
	p_val	avg_logFC	pct.1	pct.2	p_val_adj	p_val_adjust
Socs2	4.67463e-08	0.401818	0.35	0.043	0.000951053	0.000657206

## Sheet: P50FvsOVX_Vgat9
	p_val	avg_logFC	pct.1	pct.2	p_val_adj	p_val_adjust
Socs2	2.7654e-07	0.493854	0.371	0.032	0.0056262	0.00381652

## Sheet: P50FvsOVX_Vgat10
	p_val	avg_logFC	pct.1	pct.2	p_val_adjust

[truncated: 74 more sheets: P50FvsOVX_Vgat11, P50FvsOVX_Vgat12, P50FvsOVX_Vgat13, P50FvsOVX_Vgat14, P50FvsOVX_Vgat15, P50FvsOVX_Vgat16, P50FvsOVX_Vgat17, P50FvsOVX_Vgat18, P50FvsOVX_Vgat19, P50FvsOVX_Vgat20, P35FvsOVX_Vgat1, P35FvsOVX_Vgat2, P35FvsOVX_Vgat3, P35FvsOVX_Vgat4, P35FvsOVX_Vgat5, P35FvsOVX_Vgat6, P35FvsOVX_Vgat7, P35FvsOVX_Vgat8, P35FvsOVX_Vgat9, P35FvsOVX_Vgat10 …]
