# Supplementary material for: Esr1-dependent signaling and transcriptional maturation in the medial preoptic area of the hypothalamus shape the development of mating behavior during adolescence
Source: eLife. 2026 Jun 19;14:RP106347. doi: 10.7554/eLife.106347 (PMC13282117; doi:10.7554/eLife.106347)
Supplement: Supplementary file 5. [file elife-106347-supp5.xlsx]

## Sheet: VgatEsr1P50FvsOVX
	p_val	avg_logFC	pct.1	pct.2	p_val_adjust
Fgfr1	5.53838e-15	0.852525	0.693	0.423	8.83594e-11
Pdzrn4	4.31427e-39	0.749789	0.79	0.271	6.89592e-35
Socs2	6.23896e-41	0.691835	0.475	0.02	9.97298e-37
Pgr	2.29194e-33	0.673901	0.786	0.294	3.66321e-29
Tmem35a	3.1084e-20	0.61189	0.607	0.263	4.96411e-16
Zbtb20	5.03589e-21	0.582345	0.965	0.84	8.04382e-17
Hpcal1	5.54036e-28	0.573284	0.895	0.486	8.85461e-24
Elmo1	1.04076e-19	0.547276	0.716	0.366	1.66188e-15
Nts	3.95377e-07	0.544115	0.401	0.226	0.00626039
Sccpdh	2.03414e-22	0.531248	0.732	0.329	3.25015e-18
Nrip1	2.38036e-22	0.52819	0.467	0.12	3.8031e-18
Olfm3	7.82826e-17	0.489318	0.693	0.349	1.24947e-12
Ptp4a1	4.77306e-21	0.487524	0.883	0.574	7.62449e-17
Tmcc3	9.26839e-19	0.482007	0.879	0.603	1.47979e-14
Tmem158	1.55483e-15	0.474482	0.903	0.657	2.48088e-11
Sv2c	3.8925e-15	0.474005	0.521	0.209	6.21048e-11
Maf	2.44789e-21	0.463366	0.342	0.046	3.9105e-17
Pcp4	7.69562e-20	0.459089	1	0.986	1.22891e-15
Scg2	7.42606e-22	0.454814	1	0.98	1.18639e-17
Enah	4.65269e-10	0.450315	0.907	0.723	7.40616e-06
Nop56	5.86138e-18	0.447329	0.813	0.443	9.3571e-14
Parm1	2.668e-16	0.445568	0.451	0.146	4.25812e-12
Pak3	1.81519e-23	0.427861	0.992	0.903	2.90068e-19
Kcns2	1.32095e-20	0.423742	0.494	0.143	2.1097e-16
Sez6l	4.34267e-16	0.410085	0.934	0.694	6.93047e-12
Meg3	2.35481e-24	0.407693	1	1	3.76322e-20
Maged1	1.54118e-18	0.407577	0.977	0.817	2.46049e-14
Id4	1.64631e-11	0.404621	0.732	0.457	2.62307e-07
Apoc3	7.7033e-18	0.394527	0.455	0.12	1.22968e-13
Kcnk2	3.35964e-10	0.376404	0.755	0.449	5.34922e-06
Hs3st5	1.21098e-14	0.374006	0.436	0.146	1.93176e-10
Rap1gap	2.88956e-12	0.373886	0.759	0.477	4.60625e-08
Eif1b	7.62096e-19	0.371988	0.977	0.886	1.21684e-14
Irs4	2.87285e-13	0.368299	0.934	0.823	4.58133e-09
Prkce	1.86474e-10	0.360043	0.778	0.534	2.9696e-06
Chpt1	5.1381e-13	0.358496	0.451	0.183	8.19321e-09
Brinp2	1.91816e-13	0.351793	0.611	0.297	3.05946e-09
Pdcd4	9.77448e-09	0.349192	0.875	0.649	0.000155307
Neo1	2.4892e-09	0.349037	0.502	0.257	3.95882e-05
Spock3	4.0001e-08	0.347442	0.654	0.437	0.000634976
Plcb4	4.75173e-11	0.344747	0.751	0.469	7.57045e-07
Itm2c	5.78955e-21	0.34047	0.996	0.986	9.24708e-17
Hsph1	2.64469e-13	0.340283	0.93	0.714	4.21776e-09
Ecel1	2.15886e-08	0.337429	0.58	0.363	0.000342914
Fndc9	1.34316e-10	0.327258	0.646	0.363	2.13925e-06
Atp1b3	3.68527e-08	0.322985	0.728	0.517	0.000585111
Msi2	2.61394e-09	0.322104	0.712	0.451	4.15669e-05
Spon1	3.59218e-07	0.320758	0.245	0.091	0.00568858
Ctnna2	7.47257e-09	0.31749	0.665	0.429	0.000118739
Rbbp7	1.08078e-07	0.314425	0.584	0.38	0.00171411
Cartpt	9.85126e-05	0.31141	0.167	0.069	1.5366
Pcdh7	4.80411e-10	0.31133	0.891	0.72	7.64671e-06
Ogt	2.60777e-09	0.310782	0.981	0.889	4.14714e-05
Chml	1.80482e-17	0.307858	0.319	0.054	2.88085e-13
Ptpn5	5.15837e-09	0.302886	0.735	0.469	8.1982e-05
Tead1	7.86921e-07	0.301757	0.506	0.303	0.0124491
Nexmif	6.85823e-08	0.301611	0.584	0.351	0.00108813
Nrp1	1.53125e-12	0.300558	0.358	0.111	2.44142e-08
Neto2	3.67469e-09	0.298475	0.362	0.151	5.84128e-05
Stk19	1.36903e-08	0.293685	0.584	0.323	0.000217498
Odc1	6.5964e-06	0.288251	0.634	0.44	0.10392
Kl	3.87557e-10	0.287926	0.241	0.06	6.16991e-06
Prrt1	2.66535e-08	0.283206	0.654	0.406	0.000423285
Nos1	2.9253e-08	0.282058	0.459	0.231	0.000464479
Ogfrl1	1.20464e-10	0.281811	0.728	0.44	1.91887e-06
Htr1b	3.74728e-08	0.279452	0.424	0.209	0.000594919
Hspa4	6.30151e-09	0.279397	0.693	0.466	0.000100144
Drp2	6.84765e-12	0.278988	0.377	0.129	1.09138e-07
Plekhb1	9.84358e-08	0.277699	0.498	0.271	0.00156129
Arhgef9	2.07072e-08	0.277105	0.833	0.626	0.000328933
Fstl5	2.64596e-09	0.276365	0.829	0.637	4.20707e-05
Ddhd1	2.00561e-10	0.27309	0.545	0.263	3.19374e-06
Gfra1	1.15327e-09	0.272961	0.506	0.243	1.83531e-05
Hspa5	4.91482e-08	0.271914	0.7	0.469	0.000779932
Dgkb	2.54647e-07	0.269805	0.813	0.623	0.00403462
Mmd	1.96828e-06	0.268734	0.735	0.546	0.031093
Lrp1b	1.31431e-09	0.267719	0.953	0.771	2.09119e-05
Chst11	2.35523e-12	0.267208	0.374	0.126	3.75495e-08
Iqsec3	3.77925e-08	0.26711	0.642	0.4	0.000599955
H2-Q2	4.63611e-08	0.267033	0.253	0.089	0.000735751
Fam46a	1.66864e-06	0.266712	0.486	0.283	0.0263662
Scml4	3.39532e-12	0.265685	0.358	0.109	5.41214e-08
Ets2	3.61169e-07	0.262678	0.7	0.463	0.00571911
Gabre	2.30207e-09	0.260782	0.603	0.337	3.66144e-05
Idnk	7.20051e-10	0.258998	0.467	0.211	1.14603e-05
1500009L16Rik	3.74493e-06	0.254055	0.767	0.577	0.0590762
Hcn1	5.50063e-06	0.254	0.553	0.357	0.08669
Ralgps2	9.48783e-05	0.251044	0.541	0.354	1.48039
Mast4	6.44423e-07	0.250821	0.634	0.389	0.0101961
Irs2	1.26323e-09	0.249438	0.502	0.237	2.01006e-05
Rps6ka3	8.39105e-14	0.249086	0.23	0.031	1.33846e-09
Map2k1	6.19561e-08	0.248909	0.809	0.617	0.000983058
mt-Nd3	2.6333e-12	0.247957	0.996	0.946	4.19801e-08
Slc6a11	0.00017848	0.246946	0.525	0.354	2.7734
Scd2	1.87343e-06	0.246404	0.907	0.726	0.0295983
Nrsn1	8.92469e-12	0.245893	0.996	0.963	1.42215e-07
Elavl4	9.68002e-07	0.244168	0.918	0.791	0.0153109
Kpnb1	4.64905e-07	0.238558	0.72	0.443	0.00735804
Rbms3	5.44947e-07	0.23804	0.475	0.26	0.00862433
Nos1ap	4.60506e-09	0.234644	0.638	0.334	7.31928e-05
Mical2	3.68328e-10	0.234061	0.315	0.103	5.86414e-06
Grik1	4.22956e-07	0.232307	0.366	0.183	0.0066954
Pik3r3	7.85655e-11	0.23228	0.35	0.117	1.25155e-06
Phlda1	1.89136e-06	0.230766	0.268	0.114	0.0298797
Syne2	1.95148e-09	0.228546	0.323	0.109	3.10422e-05
Tcf4	0.000125158	0.228535	0.564	0.374	1.94996
Trp53inp1	9.78714e-13	0.227914	0.21	0.029	1.56056e-08
Gm16485	1.37432e-15	0.22763	0.272	0.04	2.19299e-11
Ywhah	3.76869e-09	0.22716	0.996	0.946	5.99034e-05
Pard3	4.20555e-07	0.226902	0.432	0.226	0.00665781
Dlgap1	3.25656e-07	0.226193	0.529	0.3	0.00515741
Mgat5	2.52378e-07	0.224921	0.58	0.326	0.00399894
Mef2c	4.00241e-05	0.222987	0.284	0.146	0.627218
Slitrk6	2.93539e-10	0.220849	0.214	0.046	4.67402e-06
Fkbp4	1.10293e-06	0.220078	0.642	0.406	0.0174428
Phyhipl	3.98907e-07	0.22006	0.665	0.426	0.00631589
Pcdh15	0.000165108	0.219956	0.482	0.326	2.56694
Ormdl1	2.63682e-09	0.217576	0.261	0.08	4.19281e-05
Gm1673	2.86711e-06	0.217355	0.922	0.809	0.0452659
Cbln2	0.190978	0.215484	0.14	0.109	1841.41
1110008P14Rik	4.23307e-07	0.214459	0.755	0.52	0.00670053
Map1lc3a	4.03094e-05	0.21407	0.953	0.837	0.631607
Tnxb	1.31498e-15	0.211695	0.179	0.003	2.09845e-11
Negr1	1.34119e-05	0.210629	0.981	0.911	0.210928
Dgkd	2.64378e-07	0.210625	0.416	0.209	0.00418827
Nxn	7.09147e-12	0.209701	0.187	0.023	1.1301e-07
Rmst	3.23937e-06	0.207632	0.743	0.491	0.0511302
Npr2	1.44232e-07	0.206947	0.296	0.12	0.00228694
Chl1	0.000126298	0.205061	0.778	0.626	1.96746
Prickle2	4.59801e-06	0.204436	0.533	0.329	0.0725014
Lpp	7.41829e-11	0.203983	0.315	0.094	1.18181e-06
Csrnp3	0.000264831	0.203089	0.669	0.52	4.10144
Pdyn	2.61676e-05	0.201965	0.253	0.117	0.410622
Rasd1	1.07648e-08	0.201488	0.148	0.023	0.000171031
Cxxc5	5.52414e-08	0.201345	0.315	0.126	0.00087657
Nectin3	1.38379e-06	0.200782	0.3	0.137	0.0218736
Saraf	5.3115e-06	0.200714	0.899	0.786	0.0837198
Clmp	4.48185e-08	0.200097	0.502	0.243	0.000711359
Elovl5	1.23079e-09	0.199938	0.304	0.1	1.95856e-05
Pitpnm3	1.43463e-10	0.199711	0.381	0.137	2.28479e-06
A730046J19Rik	1.26221e-10	0.198864	0.113	0	2.01045e-06
Naaa	1.66266e-07	0.197953	0.377	0.171	0.00263565
Sytl4	2.60117e-07	0.197451	0.089	0.006	0.00412104
Rad23b	3.54996e-06	0.197217	0.798	0.623	0.0560113
Th	3.11738e-06	0.196181	0.16	0.046	0.049211
Znrf2	6.80834e-09	0.195414	0.304	0.106	0.000108191
Srxn1	1.68008e-07	0.195259	0.455	0.226	0.00266309
Vgf	0.0372058	0.194745	0.237	0.163	491.823
Phactr1	1.13126e-05	0.194034	0.63	0.434	0.177981
Nfkbia	1.097e-07	0.192701	0.249	0.086	0.00173973
Opn3	5.43725e-12	0.19189	0.175	0.017	8.66643e-08
Dpy19l1	8.48776e-05	0.191698	0.331	0.186	1.32545
Kif5b	0.000179894	0.191265	0.911	0.78	2.79502
Mirg	4.32147e-06	0.190131	0.564	0.349	0.0681539
Col25a1	3.08043e-07	0.189923	0.268	0.103	0.00487879
St3gal1	2.37265e-07	0.18975	0.261	0.097	0.00375995
Sox4	2.46955e-06	0.189358	0.599	0.349	0.0390017
Dnm3	1.65386e-05	0.188908	0.833	0.657	0.259855
Prlr	0.00668678	0.187434	0.852	0.794	97.5267
Ikzf2	4.25134e-10	0.185968	0.245	0.06	6.76771e-06
Pak2	1.56339e-06	0.185835	0.444	0.231	0.0247079
Mrap2	0.00328031	0.185517	0.401	0.289	48.8964
Rps27l	8.20211e-07	0.184589	0.533	0.294	0.0129749
Pdk1	0.000776886	0.184495	0.428	0.289	11.8972
Map2k4	0.000144815	0.184307	0.809	0.671	2.2539
Gpr83	0.000156632	0.184236	0.21	0.097	2.43656
Txndc17	1.76236e-05	0.183583	0.724	0.534	0.276831
Cntnap2	0.000112866	0.182862	0.852	0.706	1.75958
Fsd1l	6.93007e-07	0.182524	0.537	0.286	0.0109641
Tsr2	7.08193e-05	0.182117	0.681	0.469	1.10698
Arhgap24	2.06573e-06	0.181819	0.327	0.149	0.0326282
Rps6ka6	2.67918e-06	0.179907	0.268	0.114	0.042307
Slitrk1	2.8897e-05	0.178922	0.595	0.386	0.453336
Ppa2	2.67199e-08	0.178047	0.288	0.1	0.000424312
Sema3a	2.06764e-08	0.177665	0.206	0.054	0.000328466
Hmgcs1	0.000243244	0.177618	0.751	0.517	3.7693
Ube2e3	1.24314e-06	0.177215	0.506	0.269	0.0196566
Lrfn5	8.3011e-05	0.177013	0.957	0.834	1.29655
Sox2	2.34748e-05	0.176823	0.607	0.391	0.36846
Snd1	2.81478e-08	0.176821	0.358	0.149	0.000446959
Sobp	8.34853e-05	0.176087	0.7	0.474	1.30379
Efna5	8.06289e-05	0.17584	0.895	0.726	1.25959
Rmnd5a	1.33751e-05	0.175499	0.428	0.237	0.210364
Ddc	1.73173e-06	0.174679	0.323	0.146	0.0273614
Gosr2	3.27935e-06	0.174672	0.479	0.263	0.051758
Tmcc1	0.000364682	0.174603	0.634	0.44	5.63032
Map2k7	1.39383e-05	0.173626	0.545	0.32	0.219166
Calr	0.000328055	0.173367	0.852	0.694	5.07042
Usp48	4.0197e-06	0.172977	0.424	0.214	0.0634027
Gadd45a	2.28629e-07	0.170829	0.179	0.049	0.00362332
Lysmd2	1.11772e-05	0.169633	0.568	0.349	0.175874
Higd1a	0.000127499	0.168226	0.576	0.377	1.98605
Baiap2	0.000158122	0.167343	0.459	0.289	2.45928
Ptpro	5.64882e-06	0.167277	0.755	0.549	0.089014
Plcxd3	1.64145e-05	0.166925	0.537	0.311	0.25792
Gda	9.33554e-05	0.166786	0.833	0.634	1.45672
Hsbp1	0.000376894	0.166164	0.911	0.757	5.81698
Cdr2	1.78015e-09	0.16529	0.218	0.051	2.83187e-05
Anxa6	2.51744e-07	0.164881	0.339	0.143	0.00398913
Il1rap	0.000168625	0.164461	0.393	0.223	2.62144
Ube2w	8.52792e-06	0.164112	0.572	0.329	0.134281
Tmod1	0.000100991	0.16394	0.292	0.154	1.57515
Synj1	0.000363912	0.163224	0.949	0.86	5.61917
Trp53inp2	8.63806e-06	0.163222	0.358	0.18	0.135998
Fhad1	1.82865e-07	0.162787	0.471	0.24	0.00289841
Mlec	0.0016764	0.16247	0.634	0.477	25.3387
Rasgrf2	0.00108804	0.162219	0.724	0.557	16.573
Gas7	0.000869799	0.16221	0.728	0.566	13.2931
mt-Co2	2.33187e-13	0.162184	1	1	3.7191e-09
Dpp6	9.20562e-05	0.161922	0.864	0.68	1.43672
Unc5d	0.0251657	0.161691	0.813	0.734	342.933
5330417C22Rik	6.03125e-07	0.161241	0.463	0.234	0.00954385
Cdv3	0.00117843	0.160914	0.708	0.534	17.9204
Ipo5	0.000328228	0.160811	0.51	0.326	5.07276
Rasgrf1	0.00121583	0.160412	0.533	0.377	18.4745
Sgsm1	5.68016e-05	0.16009	0.848	0.594	0.888774
Cadm1	3.58479e-05	0.160003	0.984	0.92	0.561951
Polr1d	8.18137e-05	0.159691	0.825	0.649	1.27793
Mbd5	3.66431e-06	0.159178	0.455	0.243	0.0578081
Prmt5	8.81749e-06	0.159093	0.319	0.154	0.138814
Bax	0.000267118	0.158787	0.533	0.346	4.13632
Ggct	7.65597e-08	0.158071	0.311	0.12	0.00121454
Mafg	0.000114158	0.15756	0.553	0.351	1.77961
Ube2h	2.0896e-05	0.157349	0.595	0.36	0.328067
Ahcyl2	7.02909e-05	0.157274	0.63	0.389	1.09879
Stt3a	2.96141e-06	0.156861	0.416	0.211	0.0467518
Rprm	0.00769035	0.156466	0.233	0.149	111.533
Coa5	2.74618e-05	0.156413	0.482	0.289	0.430875
Mindy2	2.12436e-05	0.155525	0.568	0.354	0.333503
Me1	8.78288e-08	0.155014	0.3	0.111	0.00139323
Shisa2	1.9697e-07	0.15467	0.179	0.046	0.00312178
2010107E04Rik	0.00259543	0.154623	0.817	0.669	38.8926
Arfgef3	0.000775552	0.154171	0.942	0.791	11.8791
Mad2l2	8.32786e-07	0.154109	0.241	0.089	0.013173
Ppp1r17	1.99024e-05	0.15403	0.265	0.123	0.312487
Ormdl3	0.000233611	0.153996	0.463	0.286	3.62191
Acvr2a	4.59153e-06	0.153994	0.342	0.163	0.0724038
Ripor2	8.21938e-06	0.153874	0.362	0.186	0.129439
Acaca	0.00016938	0.153767	0.502	0.311	2.63301
Cap2	0.000145356	0.153118	0.467	0.294	2.26202
Rgma	7.54998e-06	0.152729	0.175	0.057	0.118912
Cacna2d1	0.00193365	0.151797	0.459	0.311	29.1479
Eif4g2	0.000162004	0.151743	0.984	0.934	2.519
Gprasp2	0.00014526	0.151615	0.977	0.874	2.26068
Fem1b	0.000259324	0.151072	0.747	0.571	4.01744
Stmn4	0.00406045	0.150847	0.545	0.386	60.188
Bmi1	3.47727e-05	0.15007	0.401	0.217	0.545132
Hsp90b1	0.00177277	0.149985	0.864	0.703	26.7707
H3f3a	0.000156839	0.149867	0.802	0.569	2.43963
Ccdc85a	0.00017803	0.149398	0.37	0.214	2.76677
Banp	0.00028543	0.149083	0.311	0.177	4.41788
Stt3b	1.50462e-06	0.149014	0.362	0.166	0.023782
Npy1r	0.000129211	0.148668	0.311	0.169	2.01259
Timm10b	8.90935e-05	0.14864	0.545	0.337	1.39093
Cdh4	9.19995e-06	0.148436	0.175	0.06	0.144826
Ucp2	7.61786e-06	0.148205	0.261	0.111	0.119974
Seh1l	6.07172e-05	0.148145	0.331	0.177	0.949799
Pip4k2a	0.00058216	0.147519	0.23	0.123	8.94955
Actl6a	5.1706e-06	0.145154	0.374	0.177	0.0815094
Ly6e	0.00372509	0.145008	0.7	0.554	55.3437
Slc4a8	7.69645e-05	0.144869	0.455	0.269	1.20249
Polr2g	8.62321e-05	0.144491	0.607	0.42	1.34651
Amy1	0.000212473	0.144341	0.311	0.171	3.29673
Snrpb	4.14096e-05	0.144229	0.35	0.183	0.648806
Wwc1	2.71154e-07	0.144165	0.222	0.071	0.00429507
Lbhd2	1.71233e-05	0.143721	0.245	0.109	0.269024
Lrrfip2	0.000179441	0.143159	0.346	0.2	2.78815
Swi5	0.00019212	0.143082	0.895	0.731	2.98362
Ahcyl1	0.000461083	0.142986	0.588	0.4	7.1016
Slitrk2	0.000602701	0.142812	0.265	0.149	9.25869
Fam189a2	1.47449e-07	0.14278	0.152	0.031	0.00233765
Dgkz	0.000200817	0.142511	0.307	0.174	3.11768
Kdelr1	7.84929e-05	0.142279	0.436	0.251	1.22629
Mrpl52	0.000283843	0.141868	0.918	0.729	4.39361
Abat	0.00528617	0.141589	0.872	0.726	77.6591
Bpnt1	0.000446855	0.141486	0.541	0.354	6.88558
Gkap1	0.000178083	0.141461	0.545	0.349	2.76741
Esyt3	5.53424e-05	0.141437	0.249	0.114	0.866053
Fam171b	0.00353224	0.141289	0.875	0.791	52.5386
Raph1	0.00239878	0.140452	0.661	0.48	35.9937
Crtac1	7.51195e-05	0.140398	0.276	0.137	1.17389
Rps6ka2	0.000587073	0.140342	0.436	0.274	9.02332
Selenof	0.000888782	0.140252	0.685	0.466	13.5815
Lrig2	1.71615e-05	0.140145	0.37	0.189	0.269607
Klf9	7.56015e-05	0.140089	0.432	0.243	1.18135
Dhx40	3.42823e-06	0.140028	0.261	0.106	0.0540941
Ube2j1	0.000274932	0.139708	0.623	0.409	4.25649
Kdelr2	0.00118188	0.139588	0.432	0.291	17.9705
Cbln4	0.000240796	0.139195	0.206	0.097	3.73257
Kit	2.95032e-07	0.139045	0.148	0.031	0.00467302
Gabrq	0.00657962	0.13892	0.708	0.58	96.0229
Ankrd46	0.000116283	0.138533	0.685	0.443	1.81239
Smad5	4.62928e-05	0.138207	0.389	0.214	0.724853
Kcnq1ot1	0.000591197	0.137473	0.973	0.869	9.08433
Zfr	0.000805069	0.137202	0.883	0.74	12.32
Mgat1	0.000619064	0.137171	0.409	0.249	9.50634
Minos1	0.000596092	0.137016	0.914	0.754	9.15835
Cdkl2	6.3288e-05	0.137015	0.626	0.409	0.989888
Ssr3	0.00148648	0.136689	0.732	0.563	22.5157
Sdf2l1	4.1873e-05	0.136685	0.202	0.083	0.656024
Creb3l1	3.52786e-09	0.136473	0.121	0.009	5.60859e-05
Med13l	8.74094e-05	0.1364	0.506	0.294	1.36472
Slitrk5	0.000668003	0.136376	0.525	0.334	10.2505
Kcnmb4	5.10373e-06	0.136369	0.249	0.1	0.0804603
Slco3a1	3.35119e-05	0.136186	0.35	0.183	0.525434
Foxk1	1.99112e-06	0.136147	0.28	0.114	0.0314517
Plxnc1	0.000375946	0.136063	0.693	0.494	5.80273
Morn2	0.00166225	0.135928	0.518	0.363	25.1316
Otud6b	0.000231275	0.135473	0.498	0.311	3.58592
Pmepa1	4.21337e-05	0.13517	0.276	0.134	0.660066
Eif1	6.93445e-06	0.134556	1	0.994	0.109238
Ube2r2	0.000787309	0.13455	0.778	0.6	12.0553
Nek7	0.000326067	0.134425	0.296	0.16	5.04035
Itfg1	0.0173287	0.134216	0.778	0.669	242.03
Kbtbd11	0.00397717	0.134017	0.432	0.294	58.9893
Rbm28	0.000110798	0.133487	0.342	0.186	1.72745
Gabra3	0.00325818	0.133249	0.7	0.534	48.5762
March8	0.00226637	0.133222	0.494	0.34	34.0454
As3mt	4.45196e-06	0.133104	0.327	0.151	0.0702074
1110017D15Rik	3.11638e-05	0.13293	0.23	0.1	0.488773
Ezr	5.76962e-07	0.132824	0.171	0.046	0.00913042
Sf3a1	0.000314297	0.132793	0.397	0.237	4.86092
Rxfp3	3.197e-05	0.132638	0.113	0.029	0.501322
Tnpo3	0.000276673	0.132374	0.564	0.374	4.2829
Hk1	0.00077352	0.132282	0.603	0.429	11.8495
Tmx2	0.00100978	0.132258	0.833	0.651	15.4001
Prkacb	0.000985417	0.132252	0.988	0.986	15.0365
Hprt	6.49994e-05	0.131792	0.782	0.551	1.01646
Mtcl1	3.338e-06	0.131539	0.257	0.103	0.0526736
Mbtps1	0.000143731	0.130793	0.381	0.217	2.23717
Tpt1	0.000602763	0.130789	0.984	0.943	9.25904
Atp2a2	0.00535987	0.130742	0.868	0.714	78.7258
Cpsf2	8.3478e-06	0.130506	0.377	0.189	0.131453
Magi1	0.0156543	0.130422	0.584	0.457	219.724
Hdac2	0.00186379	0.129885	0.51	0.354	28.1265
Cnot6l	0.000438727	0.129771	0.545	0.357	6.7621
9930021J03Rik	0.00015876	0.129637	0.514	0.309	2.46888
Snhg10	6.57262e-05	0.129609	0.346	0.18	1.02769
Reep5	6.65189e-05	0.129559	0.973	0.843	1.03996
Srsf6	0.000977959	0.129288	0.607	0.417	14.9246
Cycs	0.00042784	0.129152	0.747	0.534	6.59602
Nlk	0.000201109	0.129094	0.405	0.231	3.12202
Man1a2	0.000157592	0.128847	0.591	0.377	2.45118
Chmp3	6.26234e-05	0.128823	0.685	0.443	0.979556
Itpkb	9.51078e-06	0.128748	0.144	0.043	0.149709
Hapln4	0.00033887	0.128505	0.377	0.223	5.23588
H2afv	0.00430197	0.128391	0.494	0.329	63.6477
Baiap3	0.00148768	0.128212	0.938	0.797	22.5325
Erc1	0.000187255	0.1281	0.44	0.263	2.90881
Dbn1	0.00103222	0.128086	0.595	0.409	15.7372
Dner	0.00891876	0.127861	0.72	0.574	128.395
Smc5	0.000185826	0.127798	0.455	0.274	2.88681
Ppp2r3d	3.7335e-05	0.127627	0.276	0.129	0.585188
Snrpg	0.001281	0.127559	0.7	0.511	19.4494
Rab40b	1.53244e-05	0.127513	0.202	0.077	0.240839
Bud23	0.000471353	0.127406	0.28	0.151	7.25836
Ago3	0.00148923	0.126791	0.428	0.286	22.5544
Gtpbp4	1.46919e-05	0.126616	0.529	0.303	0.230957
Cdk2ap2	0.000134849	0.126403	0.272	0.137	2.09932
Hap1	9.07247e-05	0.126235	1	0.98	1.41612
Rbm15b	1.38799e-05	0.126121	0.292	0.134	0.218261
Rngtt	2.38276e-05	0.126077	0.405	0.217	0.373975
Ubl3	0.00804434	0.125701	0.712	0.549	116.458
Ret	9.90535e-06	0.125693	0.144	0.04	0.15591
Tmem50b	0.00266598	0.125665	0.556	0.386	39.931
Mfn1	0.000454352	0.125441	0.335	0.191	6.99885
Il6st	0.000540369	0.124433	0.331	0.191	8.31412
Ubac2	7.20007e-06	0.124388	0.339	0.16	0.113415
Supt5	0.00164385	0.124349	0.595	0.414	24.8599
Zdhhc18	1.23573e-06	0.124127	0.206	0.069	0.0195406
Ralgapa1	0.00180621	0.124106	0.545	0.389	27.2629
Itgav	1.56607e-06	0.124027	0.121	0.023	0.0247486
Aifm3	3.23796e-06	0.123576	0.327	0.149	0.0511112
Whrn	1.93565e-05	0.123513	0.167	0.057	0.303936
Chac2	1.0926e-05	0.123315	0.195	0.071	0.171942
Egr2	1.20415e-06	0.122944	0.097	0.011	0.0190425
Ngb	0.000591832	0.122924	0.685	0.517	9.0935
Dnajc15	0.0014712	0.122919	0.444	0.289	22.2887
Nfasc	0.00129859	0.12287	0.654	0.446	19.7113
Hspa13	0.00125194	0.122868	0.665	0.46	19.0132
9030624J02Rik	0.00013169	0.122864	0.319	0.169	2.05081
Polr3e	5.35709e-06	0.12281	0.214	0.08	0.0844332
Wrnip1	1.50711e-06	0.122537	0.37	0.169	0.0238199
Tsnax	0.00174535	0.122495	0.677	0.494	26.367
Map2	0.00123627	0.122392	0.973	0.914	18.779
Syt6	0.00254882	0.122355	0.23	0.131	38.2119
Lrp11	0.000108669	0.122264	0.482	0.291	1.69437
Fgd3	5.55425e-06	0.122225	0.101	0.017	0.0875294
Pdia3	0.00159699	0.122008	0.584	0.411	24.1656
Cers5	0.000126248	0.121953	0.346	0.191	1.96682
Abca1	3.29717e-06	0.121721	0.097	0.014	0.0520326
Snx5	0.00465815	0.121717	0.389	0.254	68.7123
Trpm7	0.000294163	0.121624	0.335	0.186	4.55246
Ric8b	0.00192086	0.121572	0.486	0.323	28.9761
Rev3l	0.00123878	0.121227	0.486	0.309	18.8158
Tmem38a	0.000817966	0.120668	0.339	0.197	12.5132
Pid1	0.0185859	0.11993	0.339	0.243	258.53
Slc35e3	0.000648414	0.119629	0.424	0.266	9.95186
Gosr1	1.02657e-05	0.119623	0.327	0.154	0.161561
Unc5b	9.10122e-08	0.119544	0.125	0.017	0.00144364
Ebf4	0.000215379	0.119319	0.218	0.103	3.34096
Aldh9a1	1.11378e-05	0.11931	0.237	0.097	0.175265
Deptor	1.60628e-06	0.11928	0.101	0.014	0.0253824
Bid	1.24835e-07	0.118799	0.21	0.06	0.00197952
Srpr	5.80109e-05	0.118589	0.49	0.274	0.907639
Med13	0.000348886	0.118559	0.385	0.226	5.38889
Pds5b	0.000910186	0.118541	0.732	0.526	13.9004
Cul4a	0.00082693	0.118318	0.405	0.251	12.6487
Btbd11	0.000600504	0.117982	0.502	0.306	9.22555
Sipa1l1	0.00325943	0.117856	0.397	0.263	48.5916
Angptl6	8.53178e-06	0.117842	0.202	0.074	0.134333
Rtn4	0.00439961	0.11783	0.895	0.829	65.0438
Far1	0.00119474	0.117574	0.549	0.369	18.1649
Ptprn	0.00462549	0.11751	0.922	0.8	68.2444
Eif4e	0.00575996	0.117181	0.782	0.614	84.4064
Abca2	0.00109494	0.117133	0.584	0.383	16.6771
Sephs2	0.000155517	0.117131	0.432	0.251	2.41937
Zfp462	0.00092237	0.117057	0.805	0.62	14.0846
Pcmtd1	0.00619678	0.116929	0.611	0.437	90.6093
Atp6ap2	0.00689916	0.116794	0.696	0.537	100.466
Zmat4	0.00381805	0.116636	0.518	0.366	56.6827
AC149090.1	0.00190027	0.116292	0.86	0.723	28.6713
Chordc1	0.000320241	0.116069	0.626	0.394	4.95092
Maob	1.13932e-05	0.115768	0.187	0.066	0.179238
Fam199x	0.000317434	0.115707	0.362	0.209	4.90848
Ddx10	0.000335547	0.115692	0.191	0.089	5.18487
Vstm2b	0.000950805	0.11548	0.393	0.243	14.514
Lyrm9	0.00170578	0.115282	0.545	0.374	25.7743
AC101921.1	3.6245e-06	0.115211	0.121	0.026	0.0571837
Gdpd1	0.000360086	0.115196	0.455	0.274	5.5608
Stat3	1.31739e-05	0.115076	0.288	0.129	0.207212
Sall1	6.17388e-07	0.115026	0.086	0.006	0.00976893
Abhd17b	0.000132146	0.114957	0.381	0.211	2.05751
Vps37a	0.00029995	0.11486	0.339	0.189	4.64113
1110032A03Rik	0.0107336	0.114741	0.537	0.391	153.168
Eif4e3	0.00308025	0.11471	0.292	0.18	45.9912
Cyb561	0.000512272	0.114552	0.506	0.329	7.88284
Zrsr1	0.00144558	0.114419	0.494	0.343	21.9063
Chga	0.0015257	0.114361	0.374	0.229	23.0991
Myrip	2.40599e-05	0.114314	0.179	0.066	0.377596
Fem1a	4.23104e-05	0.114274	0.276	0.126	0.662792
Sgcb	0.00069913	0.114037	0.374	0.217	10.7219
Cdk16	0.000620933	0.114022	0.381	0.223	9.53443
Ccnb1ip1	0.16909	0.114003	0.436	0.363	1703.75
Syndig1	3.86911e-05	0.113812	0.175	0.066	0.606405
Ndufa7	0.00278166	0.113723	0.837	0.611	41.6276
Fuca1	0.000606898	0.113642	0.241	0.126	9.32134
Fam214b	0.000391251	0.113485	0.28	0.151	6.037
Ccpg1	0.00159769	0.113302	0.346	0.217	24.1746
Paip2b	0.000579385	0.112903	0.502	0.326	8.90804
Med9	0.00296736	0.112563	0.241	0.137	44.3413
Tmem147	0.0005817	0.112477	0.467	0.291	8.94305
R3hdm1	0.000131796	0.112356	0.872	0.7	2.05219
Slc7a1	0.0014459	0.112354	0.506	0.337	21.9097
Foxo1	0.00473795	0.111949	0.167	0.089	69.8563
Dock10	0.000154718	0.111858	0.136	0.049	2.4071
Mt3	0.00299465	0.111748	0.973	0.854	44.7311
Rnft2	0.000840737	0.111716	0.319	0.186	12.8566
Thnsl1	9.19754e-05	0.111589	0.23	0.103	1.43555
Mboat2	0.000426317	0.111589	0.296	0.16	6.57338
Myo10	0.000297791	0.111533	0.187	0.083	4.60802
Ankrd10	0.000153009	0.11142	0.494	0.289	2.38067
Abr	0.0191821	0.111326	0.837	0.731	266.363
Gpbp1	0.00967382	0.111246	0.661	0.509	138.655
Tmed2	0.00680988	0.110965	0.728	0.543	99.22
Tecpr1	0.00202698	0.110902	0.65	0.44	30.5203
Ctnnb1	0.0488394	0.110865	0.751	0.634	625.193
Ptprm	0.000207461	0.110568	0.245	0.12	3.21938
Snn	0.000131747	0.110536	0.634	0.389	2.05156
Pfkfb3	8.11857e-05	0.110309	0.163	0.063	1.2682
Zxdc	0.000173767	0.110293	0.214	0.1	2.70103
Ttll7	0.000901051	0.110283	0.576	0.377	13.7654
Taf15	0.00115737	0.110187	0.506	0.329	17.6048
Ermp1	0.000119414	0.110107	0.23	0.106	1.86106
B4gat1	0.00428492	0.110085	0.389	0.263	63.3997
Keap1	0.00337828	0.110075	0.537	0.374	50.3093
Papola	0.00292997	0.110053	0.724	0.551	43.806
Fam124a	7.48851e-06	0.109884	0.175	0.057	0.117952
Phf6	0.000588066	0.109757	0.37	0.22	9.03799
Mib2	7.41537e-05	0.10973	0.307	0.154	1.15887
Arhgap44	0.00107236	0.109677	0.506	0.329	16.3375
C130060K24Rik	5.41311e-05	0.109542	0.082	0.014	0.847314
Ppp5c	0.00544753	0.109531	0.42	0.283	79.948
Agps	0.00036498	0.109527	0.296	0.163	5.63457
Nf1	0.00549133	0.109428	0.471	0.326	80.5523
Mtmr4	0.00111178	0.109408	0.514	0.326	16.9212
Cspg5	0.0124557	0.109395	0.778	0.626	176.634
Oxtr	1.32513e-06	0.109315	0.074	0.003	0.0209517
Taf10	0.00639331	0.109274	0.362	0.24	93.3871
mt-Nd2	1.50473e-05	0.109149	1	1	0.236498
Ppip5k1	0.000435154	0.109006	0.444	0.266	6.70789
Kbtbd2	0.00377767	0.108982	0.362	0.237	56.1022
Dscam	0.00925292	0.108958	0.521	0.369	132.928
Galnt10	3.00013e-05	0.108699	0.214	0.086	0.470601
Cish	3.56318e-09	0.108633	0.113	0.006	5.6644e-05
Tunar	0.000909153	0.108622	0.265	0.149	13.8855
Senp2	0.0040153	0.108591	0.518	0.377	59.5388
Lin7c	0.0111236	0.108505	0.58	0.423	158.467
Atf6b	3.27945e-05	0.108495	0.253	0.111	0.514218
Hipk1	0.000585143	0.108415	0.615	0.411	8.99424
Mamld1	0.000204631	0.108303	0.265	0.134	3.17587
Ryr2	0.00788487	0.107947	0.358	0.237	114.252
Ppp6c	8.92338e-05	0.107821	0.401	0.214	1.39303
Cnpy3	0.00299351	0.107727	0.377	0.246	44.717
Cfl1	0.00727006	0.107655	0.984	0.897	105.692
Zfp157	0.0111358	0.107572	0.502	0.357	158.629
Dnajc14	0.000130287	0.107554	0.253	0.12	2.02909
Cmtr1	0.00193782	0.107535	0.42	0.269	29.2029
Ago2	0.0113013	0.107503	0.739	0.577	160.862
5031439G07Rik	0.000224617	0.107185	0.424	0.251	3.48336
Xpo6	0.000161232	0.107073	0.436	0.257	2.50716
Cbfb	0.000840061	0.106994	0.354	0.209	12.8479
Phc3	0.00236547	0.106972	0.432	0.277	35.4986
Ehmt2	0.000264829	0.106826	0.44	0.263	4.10168
Ykt6	0.00154242	0.106745	0.381	0.246	23.3507
6030419C18Rik	0.000308817	0.106664	0.381	0.214	4.77647
Slmap	0.00111349	0.106464	0.342	0.206	16.9462
Pappa	0.000204546	0.106443	0.105	0.031	3.17475
Brwd1	0.00196625	0.106425	0.588	0.406	29.6235
Mkl2	0.0182928	0.106313	0.774	0.611	254.654
Dcp2	0.00454397	0.106286	0.518	0.343	67.1144
Cdkl5	0.000505405	0.106273	0.541	0.351	7.77869
Flrt2	0.000816446	0.106046	0.323	0.186	12.4916
Cttn	0.0013174	0.106014	0.541	0.354	19.9916
Dlx2	0.000656256	0.105954	0.553	0.349	10.0709
Snx3	0.00100612	0.105845	0.696	0.48	15.3454
Ttpal	0.000163151	0.105604	0.307	0.16	2.53668
Npepps	0.00480618	0.105389	0.829	0.657	70.8094
Brd1	0.000275385	0.105306	0.272	0.14	4.26323
Chchd10	0.00743884	0.105289	0.868	0.694	108.049
Ssbp3	0.00665319	0.104575	0.813	0.62	97.0634
Pknox2	0.0005032	0.104561	0.171	0.077	7.74525
Sh3gl3	0.00316474	0.104469	0.556	0.391	47.2052
Wtap	0.00316945	0.104416	0.568	0.386	47.2724
Pip5k1b	4.70164e-05	0.104282	0.14	0.046	0.736136
Nr2f6	0.000246608	0.104241	0.198	0.089	3.82069
Fsd1	0.00143442	0.104224	0.311	0.18	21.7387
Prdx6	0.000698449	0.104145	0.451	0.283	10.7121
Slc39a7	0.00176234	0.10406	0.362	0.234	26.6201
Maz	0.00167679	0.10389	0.486	0.311	25.343
Atp1a1	0.0047219	0.103809	0.486	0.34	69.6244
Abcc1	1.12572e-05	0.103717	0.179	0.06	0.17712
Uqcrb	0.000797772	0.103228	0.813	0.614	12.2107
Nin	0.000263854	0.103079	0.222	0.106	4.08684
Fhod3	0.00100314	0.103011	0.148	0.066	15.3029
Psd3	0.0277659	0.102843	0.634	0.474	376.116
Rasl10b	0.00117622	0.102489	0.381	0.231	17.888
Tmem245	0.0195281	0.10201	0.623	0.46	270.542
H3f3b	0.00441641	0.102002	0.984	0.926	65.2789
Arhgef28	0.000135977	0.101907	0.206	0.089	2.11662
Tdrp	0.000243439	0.101797	0.257	0.129	3.77209
Bex2	0.00533441	0.101761	0.973	0.934	78.3625
Wnk1	0.00631773	0.101708	0.673	0.491	92.3273
D930016D06Rik	0.00533556	0.101678	0.257	0.157	78.3741
Ssr1	0.00644056	0.101629	0.918	0.78	94.058
Ube2e1	0.00747347	0.101628	0.693	0.506	108.522
Mydgf	0.000101403	0.101627	0.354	0.183	1.58148
Cacna1d	2.64906e-05	0.101603	0.237	0.1	0.415665
Ranbp9	0.00116678	0.10159	0.342	0.203	17.7467
Pi4k2a	0.00225482	0.101389	0.44	0.283	33.8787
Rpl36al	0.0139533	0.101376	0.926	0.849	196.798
Arid2	0.000851096	0.101371	0.405	0.24	13.0124
Mrpl9	0.00121469	0.101349	0.292	0.166	18.4585
Epc1	0.00360409	0.101281	0.366	0.231	53.6001
Txn2	0.00502404	0.101067	0.549	0.38	73.9187
Trio	0.00765482	0.101058	0.549	0.391	111.048
Pea15a	0.00203937	0.100964	0.934	0.84	30.6986
Hmgcr	0.00808444	0.100956	0.568	0.411	116.998
Micu3	0.0287118	0.100878	0.856	0.72	388.183
Ehd3	0.00494263	0.10083	0.494	0.343	72.7753
Oxct1	0.00630563	0.100824	0.611	0.437	92.1631
Lap3	9.82257e-05	0.10072	0.175	0.069	1.53222
Afg3l1	0.000950836	0.100629	0.447	0.274	14.5136
Snx10	0.00245399	0.100561	0.634	0.449	36.8074
Msmo1	0.00393806	0.100537	0.529	0.366	58.425
Uqcc3	0.00192536	0.100519	0.467	0.3	29.0248
Csnk1e	0.050424	0.100486	0.595	0.48	642.805
Mrpl32	0.00432677	0.100479	0.475	0.317	63.9973
Brox	0.000469841	0.100452	0.436	0.257	7.23555
Gm39244	0.000442542	0.100438	0.148	0.06	6.82045
Aqp5	1.08831e-06	0.100299	0.066	0	0.0172127
Mad2l1	1.4694e-07	0.100133	0.109	0.011	0.00232974
Cib2	0.0829241	0.100082	0.673	0.551	991.192
Igf1r	0.000678714	0.100073	0.389	0.226	10.4135
Nucb2	0.000921553	0.100058	0.268	0.149	14.073
Afg3l2	0.000197039	0.0998368	0.265	0.131	3.05963
Gadd45g	0.00342435	0.0998293	0.16	0.08	50.968
Alg10b	0.0134399	0.0998107	0.424	0.294	190
Aff4	0.0168618	0.0997779	0.895	0.774	235.762
Smim7	0.00461838	0.0997671	0.444	0.297	68.1442
Bend7	5.30375e-05	0.0997451	0.183	0.069	0.83025
Lig4	0.000119818	0.0997024	0.187	0.077	1.86713
Tmem50a	0.0214502	0.0996873	0.677	0.509	295.412
Ppp6r2	0.00544134	0.0996863	0.358	0.237	79.8734
Pgd	6.52291e-05	0.0996129	0.331	0.169	1.01999
Qrich1	0.00104161	0.0995454	0.459	0.289	15.8762
Fam222a	1.00508e-05	0.0993486	0.218	0.083	0.15819
Kmt5c	1.85146e-05	0.099207	0.14	0.04	0.290808
Ammecr1l	0.000693048	0.0991957	0.323	0.183	10.6307
Pds5a	0.000572989	0.0990599	0.389	0.231	8.81028
Esf1	0.00610628	0.098657	0.409	0.271	89.3227
Tmem9b	0.00759429	0.0986448	0.424	0.286	110.216
Cyb5r4	0.000765891	0.0986022	0.226	0.117	11.7358
H13	0.00281294	0.098552	0.572	0.377	42.0843
Hnrnpu	0.00680899	0.0985155	0.875	0.746	99.2138
Phkb	0.000327045	0.0985022	0.226	0.109	5.05513
Unc80	0.000728118	0.0984613	0.946	0.777	11.1628
Gm42067	0.00030505	0.0983828	0.237	0.117	4.71883
Mcfd2	0.00269973	0.0983226	0.584	0.426	40.4311
Hpgds	0.000213955	0.0981743	0.132	0.046	3.31951
Slc5a5	0.0201407	0.0979935	0.44	0.314	278.244
Trank1	0.00384814	0.0977763	0.591	0.417	57.1217
Hs2st1	0.010324	0.0976751	0.533	0.386	147.571
Csnk1g2	0.00905127	0.097583	0.494	0.337	130.202
Twf1	0.000730492	0.0974791	0.381	0.223	11.1977
Fam98b	0.000242382	0.0974351	0.366	0.203	3.75644
Upf1	0.000616943	0.0973715	0.307	0.166	9.4744
Arl6ip5	0.00437046	0.0972562	0.599	0.431	64.6347
Anp32b	0.00780677	0.0972175	0.537	0.394	113.175
Mrpl12	0.00370704	0.0971276	0.451	0.306	55.0867
Kmt2d	0.00110132	0.096996	0.354	0.214	16.7687
Spag1	0.000177434	0.0965826	0.183	0.077	2.75785
Zcchc7	0.00669539	0.0965012	0.584	0.417	97.6389
Gnptab	0.00115348	0.0963658	0.272	0.151	17.5467
Fkbp14	3.94843e-05	0.0963226	0.167	0.06	0.618798
Dnajc3	0.00134854	0.0963106	0.296	0.169	20.4586
Exosc2	0.00377938	0.0962179	0.257	0.151	56.1238
Btg3	2.93924e-05	0.0961083	0.136	0.04	0.461078
Cbx3	0.0794533	0.0959876	0.829	0.743	956.221
Astn1	0.00480108	0.0958827	0.895	0.789	70.7439
Dip2b	0.00194277	0.0957951	0.346	0.206	29.2756
Acbd5	0.0158129	0.0956948	0.405	0.289	221.854
Cstf2	0.00726518	0.0956692	0.49	0.343	105.628
Tmtc2	0.00146139	0.0956113	0.163	0.077	22.1415
Snx6	0.00241085	0.0955829	0.307	0.189	36.1699
Efemp1	4.98984e-05	0.0954834	0.062	0.006	0.78121
Gal	0.0270117	0.0954802	0.276	0.189	366.684
Sdc2	0.000788113	0.0954307	0.389	0.231	12.066
Greb1	5.02965e-06	0.0953258	0.074	0.006	0.0792975
Chodl	0.0084014	0.0953079	0.323	0.211	121.367
Mtfr1l	0.000743868	0.0952996	0.346	0.2	11.4005
Icam5	2.22732e-05	0.0952944	0.144	0.043	0.349644
Hdac1	0.00917923	0.0948868	0.249	0.154	131.942
Pnrc2	0.000738922	0.0947839	0.401	0.234	11.3255
Numa1	0.00202996	0.0947376	0.486	0.326	30.561
Asic2	0.0105889	0.0946946	0.447	0.309	151.21
Coq9	0.000339951	0.0946416	0.307	0.163	5.25224
Rraga	0.019055	0.0946408	0.556	0.423	264.693
Zranb2	0.0272817	0.0946405	0.93	0.78	370.104
Cisd3	0.00190226	0.0946313	0.377	0.234	28.6994
Rhou	0.00101018	0.0945124	0.23	0.12	15.4052
AF529169	0.00103281	0.0944462	0.132	0.054	15.7452
Cacfd1	0.00211044	0.0942361	0.447	0.283	31.7559
Mrps24	0.017129	0.0941664	0.58	0.437	239.275
Usp9x	0.00803236	0.0941145	0.895	0.794	116.301
Flywch2	0.00546735	0.0939666	0.292	0.183	80.2224
Cfap36	0.00258934	0.0939476	0.525	0.354	38.8064
Spag9	0.0152201	0.0938263	0.86	0.734	213.979
Rnf152	0.00235646	0.0938048	0.214	0.114	35.3704
Tnpo2	0.00108697	0.0937867	0.494	0.303	16.5577
Sdhaf1	0.00128684	0.0937271	0.405	0.246	19.5367
Gm28884	1.33526e-06	0.0936745	0.074	0.003	0.0211105
Ankib1	0.00155471	0.0936556	0.377	0.231	23.5352
Fgfr1op2	0.0418045	0.0936356	0.661	0.529	546.594
Lpgat1	0.0500984	0.093462	0.693	0.549	639.405
Hdac6	0.000215563	0.0932618	0.241	0.117	3.3436
Dennd5b	0.0125048	0.0932611	0.755	0.586	177.293
Rplp0	0.00613844	0.0931733	0.953	0.911	89.7746
Epb41l4aos	0.000432592	0.0928863	0.381	0.217	6.66884
Dhx9	0.0174544	0.0924993	0.475	0.334	243.681
Tcea1	0.0336035	0.0924767	0.51	0.38	448.27
Arxes1	0.0212166	0.0922477	0.358	0.249	292.301
Serinc5	0.000561662	0.0922254	0.16	0.069	8.63893
Amotl1	0.0126257	0.0921634	0.541	0.4	178.907
Adipor2	0.000841361	0.0919754	0.257	0.137	12.8653
Itih5	0.0029565	0.0919505	0.093	0.034	44.1908
Erbin	0.000395203	0.0919366	0.175	0.077	6.0968
Gtf3c6	0.00106885	0.0919295	0.28	0.157	16.286
Airn	1.89591e-05	0.0919117	0.082	0.011	0.297772
Nrsn2	0.0159818	0.0918215	0.969	0.923	224.065
Usp50	0.00954226	0.0917999	0.397	0.269	136.845
Aprt	0.00463558	0.091765	0.436	0.289	68.3841
Tyms	0.00200593	0.0917253	0.144	0.066	30.2133
Kdm6b	0.0079893	0.0916792	0.393	0.26	115.709
Tmem267	3.12478e-05	0.0916508	0.21	0.086	0.49006
Tm2d2	0.00309096	0.0916025	0.385	0.237	46.1419
Rcbtb1	0.00293908	0.091597	0.335	0.206	43.9363
D8Ertd738e	0.0297469	0.0915362	0.856	0.729	401.255
Pdik1l	0.00100277	0.0914464	0.3	0.166	15.2982
Fam210a	0.000893928	0.0914386	0.268	0.146	13.6583
Carm1	0.00135466	0.0913506	0.339	0.203	20.5502
Eif4a1	0.00701058	0.0911649	0.817	0.646	102.032
Tle2	0.00216874	0.0911013	0.241	0.134	32.6091
Yipf5	0.0051153	0.0910736	0.482	0.329	75.2051
B3glct	9.03201e-05	0.090919	0.128	0.04	1.4099
Ptk2	0.00454424	0.090895	0.339	0.209	67.1139
Mapk3	0.00256755	0.0908866	0.568	0.386	38.485
Timm29	0.00878753	0.0908767	0.44	0.314	126.734
Kif3a	0.00883679	0.090803	0.759	0.594	127.409
Fam91a1	0.00389079	0.0907663	0.514	0.351	57.7393
Krr1	0.000589025	0.0907392	0.37	0.217	9.05213
Caml	0.000844084	0.0906474	0.292	0.163	12.906
Hebp2	1.47887e-05	0.090568	0.187	0.066	0.232464
March2	0.0040381	0.0905028	0.634	0.414	59.8689
Rnf19a	0.000692822	0.0904553	0.183	0.086	10.6279
Arpc5l	0.00970552	0.0903633	0.798	0.609	139.08
Sdhaf4	0.000242865	0.090268	0.451	0.269	3.76368
Lats1	0.000450107	0.0902645	0.241	0.12	6.93434
Mia3	0.00100194	0.0901161	0.545	0.357	15.2866
Oaz2	0.00856826	0.0899465	0.922	0.806	123.709
4833439L19Rik	0.0108438	0.0899357	0.607	0.463	154.654
Cacul1	0.0177648	0.0899096	0.572	0.411	247.784
Msl1	0.00897474	0.0897831	0.743	0.537	129.164
Cuta	0.000414839	0.0897288	0.381	0.214	6.39807
9530068E07Rik	0.00313711	0.0896538	0.607	0.423	46.8088
Zscan26	0.0671571	0.0896277	0.568	0.454	828.181
Baalc	0.0111832	0.0895754	0.35	0.237	159.261
B4galt2	0.00272648	0.0895754	0.335	0.209	40.8235
Plppr3	0.0132736	0.0895725	0.553	0.403	187.768
Dclk2	0.000180518	0.0895615	0.28	0.14	2.80453
Golga7	0.00824355	0.0895362	0.424	0.291	119.185
Zfp446	0.000107455	0.0895085	0.202	0.086	1.67565
Unc45a	0.000293446	0.089483	0.214	0.1	4.54166
Atp5e	0.0121528	0.0894271	0.914	0.809	172.46
Tbk1	0.0155746	0.0894116	0.307	0.206	218.683
Ipo9	0.000449748	0.0893615	0.451	0.274	6.92927
Ap3m1	0.00175323	0.0893572	0.272	0.154	26.4843
Washc5	0.000855895	0.0893369	0.226	0.114	13.0849
Zfp422	0.00423087	0.0891735	0.3	0.183	62.6211
Csnk2a2	0.0024247	0.0891698	0.518	0.343	36.3753
Tesc	0.0014763	0.0891232	0.191	0.094	22.3645
Sh3glb1	0.000703299	0.0891171	0.416	0.24	10.7851
Tmem263	0.0094355	0.0891057	0.471	0.317	135.409
Tspyl2	0.0047096	0.0891014	0.774	0.591	69.4478
Atraid	0.0158405	0.0890513	0.479	0.337	222.226
Zfp937	0.00112568	0.0890388	0.183	0.089	17.1272
Park2	0.00812526	0.089013	0.284	0.18	117.564
Tomm34	0.0129187	0.088994	0.436	0.309	182.929
Slc1a1	0.000269505	0.0889131	0.377	0.211	4.17302
Prrc1	4.0155e-05	0.0887428	0.198	0.077	0.629229
Aes	0.0142354	0.0882014	0.934	0.769	200.676
Tbc1d30	0.000215301	0.0881649	0.339	0.18	3.33996
Spred1	0.00102658	0.0881189	0.576	0.386	15.6523
Sdad1	0.000862378	0.0880888	0.276	0.151	13.1814
Fjx1	1.40524e-05	0.088001	0.121	0.029	0.220945
Map9	0.0254684	0.0879721	0.642	0.489	346.778
Eef1a2	0.00942737	0.087929	0.665	0.486	135.302
Gfpt1	0.00567015	0.0878389	0.638	0.429	83.1131
Nrxn3	0.00302337	0.087816	1	0.994	45.151
Yipf3	0.00106379	0.0878147	0.226	0.117	16.2112
Ppa1	0.0129791	0.087785	0.366	0.254	183.758
Dad1	0.00229034	0.0877264	0.556	0.357	34.3918
2610301B20Rik	0.00211191	0.0876815	0.51	0.331	31.7757
Gdf11	0.00111448	0.0876771	0.241	0.129	16.9579
Cept1	0.00129258	0.087662	0.354	0.209	19.6213
Mfsd6	0.0356624	0.0874755	0.58	0.466	473.454
Atxn2	0.00682206	0.0873978	0.65	0.443	99.3906
Cdh24	0.0025592	0.0873421	0.125	0.054	38.3624
Romo1	0.0834991	0.0873328	0.751	0.629	996.896
Mga	0.0273506	0.0873083	0.619	0.466	370.957
Trp53i11	0.00261214	0.0870936	0.292	0.174	39.1376
Arfgap1	0.00929564	0.0870543	0.401	0.271	133.485
Myo18a	0.014136	0.0870356	0.42	0.286	199.304
Tmem86a	8.66101e-05	0.0869555	0.128	0.04	1.35233
Snx30	0.00941504	0.0869358	0.486	0.329	135.134
Cdkn1b	0.00166662	0.0868574	0.191	0.097	25.1942
Uxs1	0.00133278	0.0866414	0.276	0.154	20.2223
Exoc7	0.000774089	0.0865169	0.175	0.08	11.8575
Disp2	0.00815657	0.0863737	0.957	0.8	117.993
Zfp667	0.00368032	0.0863564	0.346	0.217	54.697
Cetn2	0.00234261	0.0862019	0.471	0.306	35.1673
Sox5	0.000343636	0.0861662	0.327	0.174	5.30848
Poglut1	0.00826348	0.0861063	0.486	0.337	119.465
Stk11	0.0100312	0.0860996	0.35	0.226	143.606
Psme1	0.0593273	0.0860594	0.451	0.351	742.599
Mturn	0.00414969	0.0860099	0.35	0.217	61.4445
Sntg1	0.00353029	0.0859549	0.237	0.137	52.5131
Ern2	0.000319117	0.0857479	0.109	0.034	4.93386
Hyou1	0.000506592	0.0855493	0.233	0.117	7.79644
Ccp110	0.00137477	0.0855176	0.385	0.231	20.8484
Prpf40b	0.00123151	0.0854202	0.331	0.191	18.7091
Rnf7	0.0600789	0.0853359	0.805	0.651	751.166
Bola3	0.0226382	0.0852695	0.708	0.543	310.596
Csgalnact1	4.51762e-05	0.0851799	0.089	0.017	0.707594
Lhfpl3	0.00170573	0.0851155	0.268	0.149	25.7752
Insig2	0.00138106	0.0850757	0.502	0.326	20.9424
Sec22a	0.00178383	0.0848154	0.257	0.14	26.9358
Tor1b	0.00277345	0.0847943	0.292	0.171	41.5102
Nol4l	0.0034048	0.0847177	0.276	0.169	50.6873
Gnl3	0.0404669	0.0846906	0.475	0.36	531.007
Lman2	0.00745174	0.0844323	0.405	0.271	108.222
Senp5	0.00331848	0.0844096	0.467	0.306	49.442
Arfgef1	0.0358524	0.0844037	0.494	0.386	475.726
Trim32	0.0118864	0.0843034	0.65	0.469	168.787
Manea	0.0306475	0.084026	0.257	0.174	412.485
Rps6kb1	0.012291	0.0840169	0.553	0.397	174.349
Arglu1	0.0606804	0.0839493	0.805	0.683	757.291
Krt222	0.000798884	0.0838964	0.222	0.111	12.2269
Nup214	0.00251427	0.0838899	0.187	0.097	37.704
Akt1s1	0.00120975	0.083877	0.3	0.169	18.3858
Tmco3	0.00735912	0.0838591	0.339	0.214	106.921
Prpsap1	0.001367	0.0838196	0.354	0.214	20.7346
Psmf1	0.00202603	0.0838015	0.206	0.109	30.508
Sntb2	2.25148e-05	0.0837964	0.14	0.04	0.353414
Usp30	0.0276829	0.0837745	0.288	0.2	375.048
C1ql2	0.0104441	0.083718	0.109	0.051	149.204
Mir9-3hg	4.32461e-05	0.0837028	0.089	0.017	0.677408
Ahdc1	0.00298838	0.0836936	0.494	0.326	44.6434
Il1rapl2	0.00505124	0.0836217	0.163	0.086	74.3088
Lpcat4	0.00012496	0.0835567	0.183	0.074	1.947
Camk4	0.040914	0.0835465	0.311	0.229	536.424
Chchd1	0.00438836	0.0835173	0.545	0.363	64.8862
Clip1	0.00919513	0.0834967	0.681	0.506	132.152
Zdhhc2	0.00765813	0.0834457	0.704	0.489	111.081
Triap1	0.0038612	0.083444	0.307	0.189	57.3079
Celf2	0.0931563	0.0833839	0.887	0.806	1089.28
Itgb1	0.000368011	0.0832906	0.261	0.129	5.68098
Dnajc21	0.0455125	0.0832777	0.444	0.331	586.337
Vma21	0.0387776	0.0832206	0.58	0.469	510.662
Col11a1	0.00390832	0.0831806	0.089	0.034	57.9955
Trappc11	0.00101365	0.0831472	0.241	0.129	15.4571
Galnt14	0.00088614	0.0831143	0.432	0.257	13.542
4930447C04Rik	0.0039206	0.0830606	0.214	0.117	58.1738
Cabin1	0.00323781	0.0830501	0.49	0.323	48.2822
Smc3	0.00346748	0.0830454	0.549	0.369	51.5995
Spg20	0.000262752	0.0830201	0.311	0.166	4.07003
Gatad2a	0.000300043	0.0830057	0.253	0.126	4.64226
Tgfbr1	0.00036243	0.0829718	0.152	0.06	5.59665
Akirin1	0.00376688	0.0829345	0.533	0.363	55.9494
Cyb5r3	0.00985884	0.0829253	0.502	0.357	141.228
Mbd6	0.000709584	0.0829228	0.233	0.12	10.8808
Arl5a	0.00292891	0.0829129	0.634	0.431	43.7931
Ctxn3	0.00426387	0.0828681	0.195	0.103	63.0968
Vps18	0.00126281	0.082845	0.226	0.117	19.1757
Tnfaip8l3	1.35574e-06	0.0828436	0.074	0.003	0.0214316
Etnk2	0.00328382	0.0828194	0.284	0.166	48.9453
Ifnar1	0.00440419	0.082808	0.233	0.134	65.1028
Pnpt1	0.00310911	0.0827371	0.218	0.12	46.4003
Stx5a	0.00260291	0.082592	0.514	0.334	39.0019
Ago1	0.000790593	0.0825609	0.393	0.229	12.1024
Adcy3	0.00164396	0.0824487	0.35	0.206	24.86
Stim2	0.0293653	0.0824196	0.284	0.197	396.461
Ly6h	0.0127067	0.0824078	0.981	0.937	180.003
Snx25	0.000393223	0.082297	0.241	0.117	6.06665
Csnk2a1	0.00120046	0.0822886	0.642	0.429	18.247
Tmbim6	0.148139	0.0822315	0.77	0.62	1543.76
Hmgcl	0.00728108	0.0821963	0.179	0.1	105.845
Pet100	0.051203	0.082138	0.377	0.283	652.173
Cdc23	0.00131205	0.0820996	0.331	0.194	19.913
Tra2b	0.0511613	0.0820804	0.798	0.666	651.744
Zfp383	0.00308915	0.0820776	0.202	0.109	46.1179
Mex3b	7.16774e-05	0.0820554	0.16	0.057	1.12032
Rpl23a	0.00287927	0.0819723	1	1	43.0652
Ltn1	0.00206983	0.0819551	0.23	0.126	31.153
Fam8a1	0.0664842	0.081896	0.704	0.577	821.079
Pi4ka	0.00805843	0.0818604	0.549	0.397	116.654
Inip	5.50357e-05	0.0818253	0.121	0.034	0.861364
Ehmt1	0.00226462	0.0817818	0.362	0.22	34.0214
Hexim1	0.00934202	0.0817349	0.265	0.163	134.142
Fut8	0.00993029	0.0816672	0.568	0.406	142.222
Pld5	0.00288627	0.0816561	0.128	0.057	43.1642
Gm3636	0.000242011	0.0816531	0.14	0.051	3.75092
Rab37	1.29881e-05	0.0816046	0.07	0.006	0.204303
Scn9a	0.0417834	0.081602	0.572	0.426	546.401
Ypel2	0.0064803	0.0815831	0.304	0.189	94.6124
Srsf4	0.00011971	0.0814936	0.3	0.146	1.86556
Znfx1	0.0333237	0.0814359	0.117	0.069	444.971
Men1	0.00138276	0.0813049	0.233	0.123	20.9667
Lman2l	0.0112201	0.0811437	0.603	0.423	159.762
Zfp72	0.000215202	0.0810951	0.132	0.046	3.33864
Chrna3	6.00605e-06	0.0809765	0.121	0.026	0.0946313
Mat2a	0.0585411	0.0809434	0.844	0.723	734.223
Ubqln1	0.0170673	0.0809373	0.689	0.514	238.464
Igdcc4	0.0021221	0.0809295	0.397	0.246	31.9207
Gm5914	0.000342671	0.0808658	0.292	0.151	5.29392
Cdipt	0.00754465	0.0808639	0.556	0.391	109.533
Taf1	0.0116227	0.0807753	0.49	0.343	165.158
Ostc	0.00578747	0.080649	0.51	0.32	84.7922
Nek9	0.00130544	0.0806026	0.191	0.094	19.814
Ak4	0.0148962	0.0805703	0.432	0.3	209.59
Gtf2a1	0.00497407	0.0805169	0.436	0.286	73.2084
Hnrnpa0	0.00971907	0.0805028	0.786	0.606	139.265
Fahd1	0.00124103	0.0804226	0.167	0.077	18.8488
Ubn1	0.00200079	0.0803694	0.362	0.22	30.1379
Sucla2	0.0041818	0.080306	0.599	0.414	61.9074
BC005537	0.0357334	0.0802974	0.716	0.577	474.325
Rprd1a	0.0285614	0.0802125	0.615	0.46	386.35
Adal	0.000392293	0.0802079	0.156	0.063	6.05269
Copz1	0.0147253	0.0801505	0.482	0.34	207.317
Irak1	0.0300894	0.0800989	0.482	0.36	405.545
Lima1	0.00381002	0.0800439	0.171	0.089	56.5712
Slain1	0.000353543	0.0800433	0.206	0.094	5.46047
Tigar	0.01234	0.0799813	0.319	0.206	175.018
Esyt2	0.00666905	0.0799561	0.327	0.206	97.2747
Slc18a2	1.61056e-05	0.0799397	0.518	0.286	0.253083
Nudcd2	0.0103596	0.0799375	0.362	0.231	148.06
Kif1b	0.0662038	0.0799082	0.93	0.857	817.947
Acer3	0.000238158	0.0798088	0.233	0.111	3.69192
Bcl7b	0.00107179	0.0797898	0.455	0.274	16.3298
Fgd1	0.000228176	0.0797831	0.156	0.06	3.53832
Agtpbp1	0.00443777	0.07974	0.591	0.389	65.5814
Sqle	0.000997732	0.079739	0.319	0.18	15.2234
Zpr1	0.00103732	0.0796064	0.261	0.14	15.8129
Cetn4	0.0146514	0.0795898	0.292	0.191	206.336
Tgoln1	0.00486149	0.0794927	0.942	0.84	71.5951
Cited4	8.30731e-05	0.0794311	0.086	0.017	1.29744
Szt2	0.000690957	0.0794117	0.14	0.057	10.6
Tmem8b	0.00384721	0.0793945	0.432	0.28	57.1118
Trim2	0.047915	0.0793885	0.872	0.754	614.557
Ext1	0.000800081	0.0793533	0.21	0.103	12.2444
Tmem215	0.0289702	0.0793294	0.121	0.069	391.387
March11	0.00106469	0.0793027	0.198	0.097	16.2237
1700037H04Rik	0.0257988	0.0792584	0.576	0.434	350.993
Hif1a	0.00388339	0.079179	0.506	0.346	57.6334
Sybu	0.0261028	0.0791121	0.611	0.463	354.868
Ddx1	0.00409251	0.0790958	0.366	0.226	60.6468
Ssbp1	0.00860327	0.0790736	0.358	0.226	124.188
Eny2	0.0115576	0.0790709	0.65	0.491	164.256
Mrgbp	0.000321886	0.0790451	0.249	0.12	4.97604
Ctu1	0.00110451	0.0789755	0.156	0.069	16.815
Selenos	0.00926346	0.0789631	0.315	0.206	133.051
Map1a	0.00808281	0.0789342	0.739	0.58	116.982
Hsf2	0.0112991	0.0788632	0.323	0.209	160.842
Fbn2	6.03727e-06	0.0788191	0.074	0.006	0.0951173
Plpp5	0.000796465	0.0787548	0.175	0.08	12.1915
Abi2	0.0353731	0.0787291	0.813	0.643	470.002
Tcf12	0.00121263	0.0785779	0.272	0.146	18.4283
Sdccag3	0.000215714	0.0785563	0.409	0.226	3.34573
Prr36	0.00845234	0.0785124	0.346	0.229	122.069
4933427D14Rik	0.000147885	0.0784743	0.265	0.129	2.30124
Ndufa13	0.0516797	0.078452	0.957	0.837	657.727
Vps13b	0.00419772	0.0783581	0.366	0.229	62.1346
Mrpl11	0.00949839	0.0782706	0.37	0.24	136.273
Tubgcp3	0.00123277	0.078234	0.296	0.169	18.7271
Dbi	0.00227314	0.0781722	0.268	0.154	34.1426
Csnk1g3	0.00372237	0.0780569	0.506	0.34	55.3069
Zkscan2	0.00225927	0.0780202	0.187	0.094	33.9433
Rell2	0.0435202	0.0779811	0.521	0.389	562.846
Klhl12	0.00347668	0.0779708	0.339	0.2	51.7296
Arsb	0.00588159	0.0777885	0.521	0.349	86.13
Ccar1	0.00983329	0.0776012	0.564	0.389	140.872
Eif5	0.012471	0.0775599	0.907	0.8	176.839
Mrps33	0.00819836	0.0775479	0.685	0.494	118.565
Fndc3a	0.00657274	0.077513	0.763	0.597	95.9292
Lrrtm2	0.035421	0.077503	0.506	0.374	470.533
Mettl9	0.115336	0.0774609	0.63	0.52	1272.96
Ncoa3	0.00137104	0.0774593	0.163	0.074	20.7931
Ddx41	0.00138823	0.0774441	0.198	0.1	21.0469
Eif3b	0.00670311	0.0773878	0.44	0.286	97.7448
Rnmt	0.00419629	0.0773212	0.514	0.337	62.1177
Prkcsh	0.00728624	0.0772858	0.401	0.254	105.905
Rbm22	0.00157967	0.0771901	0.237	0.126	23.9068
Fam53b	0.000401636	0.0770882	0.14	0.054	6.19564
Wdr26	0.00619702	0.0770758	0.556	0.386	90.6067
Ggh	0.000150776	0.0769786	0.136	0.046	2.34607
Srprb	0.00180009	0.0769599	0.389	0.24	27.1724
Irf2bp1	0.0100673	0.0768847	0.288	0.183	144.104
Qk	0.0166249	0.076881	0.253	0.163	232.6
Rara	1.38336e-05	0.076857	0.109	0.023	0.217547
Nabp2	0.00164518	0.0768315	0.463	0.289	24.8767
Rtca	0.00340546	0.07683	0.261	0.151	50.6936
Chmp7	0.0251573	0.0768162	0.432	0.309	342.843
Nptxr	0.0334701	0.0768024	0.833	0.74	446.725
Gprasp1	0.00230677	0.0767631	0.988	0.957	34.6361
Uso1	0.0185735	0.076742	0.471	0.334	258.375
Sltm	0.0203185	0.0767375	0.677	0.523	280.618
Polr3f	0.00401756	0.0766673	0.276	0.16	59.5684
Ralgds	0.00925634	0.076658	0.389	0.26	132.958
Ndufv3	0.0256661	0.0766153	0.759	0.603	349.341
Prmt7	0.000364653	0.0765995	0.272	0.14	5.63024
Faim2	0.0423282	0.0765886	0.969	0.877	551.663
Auh	0.0872454	0.0764591	0.335	0.263	1033.16
Mthfd2l	0.0178757	0.0763786	0.354	0.249	249.259
Arid3a	6.45031e-05	0.0763746	0.136	0.043	1.00883
Ap3s1	0.0139273	0.0763162	0.556	0.391	196.458
Sema6d	0.00342632	0.0762676	0.28	0.166	50.9939
Ergic2	0.00470858	0.0762145	0.451	0.289	69.4375
Sar1a	0.089609	0.0761949	0.658	0.526	1053.35
Fam183b	0.000609027	0.0761737	0.342	0.189	9.35344
Lrrc58	0.0799458	0.0760855	0.732	0.617	961.189
Asb13	0.00325203	0.076047	0.241	0.137	48.4878
Gm3667	0.000937507	0.0759633	0.097	0.031	14.3139
Cpeb1	0.00202986	0.075883	0.245	0.134	30.5616
Lmbr1	0.0159989	0.0758766	0.354	0.237	224.289
Rpf1	0.000454268	0.0758536	0.191	0.086	6.99799
Tmem229b	0.00425608	0.0756543	0.175	0.091	62.9857
Timmdc1	0.000860181	0.0756364	0.148	0.063	13.1487
Prkab2	0.0037686	0.0756278	0.268	0.154	55.9712
Acsl4	0.0181461	0.0756263	0.385	0.266	252.775
Coprs	0.0143735	0.0755882	0.58	0.42	202.552
Qrsl1	0.00127633	0.0754762	0.117	0.046	19.3797
Stbd1	3.13335e-05	0.0754056	0.086	0.014	0.491372
Gsg1l	1.91268e-05	0.0753311	0.125	0.031	0.300368
Igsf9b	0.00800027	0.0752771	0.486	0.334	115.852
Pop5	0.00478159	0.0752538	0.591	0.411	70.471
Bend5	0.00136059	0.0752474	0.233	0.123	20.6388
Dstn	0.014822	0.0751972	0.817	0.617	208.589
Rnf115	0.00630893	0.0751345	0.377	0.246	92.205
Rrn3	0.0160856	0.0751299	0.506	0.354	225.456
Cog1	0.00110857	0.0751214	0.163	0.074	16.8735
Fam78b	0.00205084	0.0751101	0.175	0.086	30.8692
E130307A14Rik	0.00679432	0.0750454	0.389	0.246	99.0068
Grcc10	0.00544677	0.07504	0.389	0.246	79.9423
Nudt4	0.00238315	0.0749126	0.405	0.257	35.7616
Opa3	0.00674073	0.0748337	0.319	0.206	98.2732
Limk2	0.00362681	0.0748283	0.401	0.249	53.9198
Spg21	0.000294419	0.0748131	0.288	0.146	4.55613
Dexi	0.00411498	0.0747672	0.424	0.274	60.9676
Mtor	0.00378224	0.0747623	0.366	0.229	56.1624
Ube2d2a	0.0234151	0.0746959	0.856	0.706	320.412
Capn7	0.00542303	0.0746742	0.354	0.223	79.6263
Ccdc137	0.00218298	0.0746635	0.206	0.109	32.8167
St3gal5	0.00289226	0.0745801	0.268	0.154	43.2509
Fmc1	0.00160968	0.0745522	0.28	0.157	24.3513
Ak6	0.000730228	0.0744815	0.284	0.151	11.1944
Zdhhc14	0.0246699	0.0744804	0.191	0.12	336.72
Glyr1	0.0112458	0.0744444	0.747	0.554	160.095
Cgn	0.00179911	0.0744357	0.28	0.157	27.1594
Enox2	0.00165455	0.0744139	0.179	0.086	25.0167
Rchy1	0.0290812	0.0743597	0.661	0.483	392.829
Coq10a	0.0083993	0.0743488	0.233	0.14	121.345
Crim1	0.111308	0.0743283	0.623	0.514	1239.63
Lin7b	0.00491517	0.0742626	0.335	0.206	72.3759
Maea	0.0103048	0.0742402	0.506	0.343	147.307
Dmwd	0.0022116	0.0741112	0.518	0.331	33.2381
Foxp1	0.0814418	0.0739693	0.424	0.326	976.406
Mrpl33	0.063737	0.0739007	0.708	0.569	790.147
Zfp277	0.00458609	0.0738004	0.125	0.057	67.6907
Rbms1	0.0143315	0.0737218	0.132	0.071	202.003
Pigs	0.00505046	0.0736528	0.342	0.211	74.3023
Lrp10	9.8195e-05	0.0736142	0.128	0.04	1.53184
Exd2	0.00281468	0.0735654	0.222	0.12	42.1076
Ttc39c	0.000189121	0.073516	0.148	0.054	2.93762
Gem	0.000197524	0.0734961	0.062	0.009	3.06696
Gm32014	0.000828929	0.0734902	0.101	0.034	12.6785
Fstl4	1.72727e-05	0.073419	0.089	0.014	0.271337
Srsf12	0.00580816	0.0733916	0.393	0.251	85.078
Mlf2	0.0386061	0.0733881	0.805	0.637	508.558
Zfp275	0.00458801	0.0733683	0.49	0.32	67.7098
Smox	9.25051e-05	0.0733216	0.125	0.037	1.44354
Prkca	0.0103733	0.0733193	0.23	0.143	148.235
Dnah1	0.00406383	0.0732951	0.214	0.12	60.23
Lrrfip1	0.00476129	0.0732766	0.272	0.163	70.1814
Zfp92	0.016616	0.0732336	0.385	0.263	232.507
Kctd18	0.00277389	0.0732111	0.183	0.094	41.514
Fam90a1b	1.25553e-05	0.0731339	0.062	0.003	0.197508
Wsb2	0.0306347	0.0730686	0.591	0.443	412.373
Polr2b	0.00468336	0.0730478	0.218	0.12	69.0748
Xrcc5	0.00449642	0.0728365	0.152	0.077	66.4301
Rybp	0.023568	0.0728197	0.572	0.414	322.387
Lamtor3	0.00978937	0.0727415	0.385	0.257	140.262
Tpp2	0.043415	0.0727394	0.3	0.209	561.616
Hspa8	0.0497615	0.072691	0.992	0.96	635.604
B130006D01Rik	0.000306363	0.0726728	0.14	0.051	4.73882
H2afx	0.00616985	0.0726388	0.276	0.169	90.2217
Nefh	0.00295911	0.0726068	0.253	0.143	44.2268
Ftl1-ps1	0.0105658	0.0725428	0.3	0.186	150.912
Kcnc1	0.054869	0.0725376	0.712	0.566	693.214
Rae1	0.00296794	0.0724683	0.245	0.137	44.3469
Bicd1	0.165812	0.072455	0.794	0.677	1680.01
Utrn	0.00385513	0.0724289	0.156	0.077	57.2217
Hrh1	0.000476966	0.0723758	0.117	0.04	7.34385
Stk4	0.000483834	0.0723744	0.241	0.12	7.44815
Gon7	0.00430213	0.0723171	0.315	0.194	63.6457
Zfp523	0.0490173	0.0723151	0.292	0.209	627.324
Arf2	0.00502063	0.0722939	0.319	0.197	73.8735
Chuk	0.0107717	0.0722879	0.447	0.309	153.691
Syt17	0.000810118	0.0722649	0.187	0.086	12.3964
Adpgk	0.00075985	0.0722374	0.23	0.114	11.6439
Mrpl35	0.00114323	0.0722211	0.268	0.149	17.3919
D830030K20Rik	0.000572088	0.0721914	0.148	0.06	8.797
Man2c1	0.000759454	0.0721333	0.21	0.103	11.6386
Fam135b	0.0100813	0.0721278	0.257	0.163	144.283
Txndc11	0.00524606	0.0720894	0.307	0.186	77.0962
Hdac3	0.0167512	0.0720567	0.44	0.3	234.266
Tvp23a	0.000650682	0.0720528	0.319	0.177	9.98601
Trim28	0.000496075	0.0720351	0.389	0.214	7.63608
Sgms1	0.00288297	0.0720213	0.311	0.183	43.1177
Map3k7	0.00129034	0.0718728	0.276	0.149	19.5886
1810037I17Rik	0.0362443	0.0717435	0.782	0.614	480.491
Uros	0.0099845	0.0716583	0.187	0.109	142.978
Ero1l	0.0086817	0.0715742	0.381	0.254	125.277
Plxna2	0.0022701	0.0715589	0.704	0.511	34.0992
Mvd	5.86737e-05	0.0715139	0.105	0.026	0.917951
Ccdc93	0.00100457	0.0714958	0.167	0.077	15.3227
Nanos1	0.000777186	0.0714228	0.35	0.2	11.9011
Hadhb	0.00922249	0.0714014	0.268	0.166	132.509
Kctd10	0.0059279	0.0713351	0.288	0.177	86.7845
Smpd1	0.00335664	0.0713337	0.35	0.211	49.9972
Gabra2	0.107031	0.0713328	0.72	0.597	1201.32
Ddx28	0.000725959	0.0713135	0.097	0.031	11.1304
Taf4	0.000621225	0.0711474	0.156	0.066	9.53829
Mtmr1	0.00330055	0.0711371	0.202	0.109	49.1815
Bbs7	0.000303555	0.0711248	0.163	0.066	4.6963
Bccip	0.00921806	0.0711053	0.44	0.3	132.463
Gpr45	0.00780434	0.0710977	0.257	0.163	113.147
Dnmt3a	0.0112224	0.0710973	0.615	0.426	159.784
Pam	0.0299711	0.0710911	0.658	0.523	404.07
Arl2bp	0.0105869	0.0710574	0.817	0.651	151.192
Naxe	0.00361116	0.0709786	0.311	0.186	53.7015
Zfp513	0.000217284	0.0709584	0.175	0.071	3.36986
Nol9	0.00081354	0.0709555	0.132	0.051	12.448
AI467606	2.79041e-05	0.0709338	0.105	0.023	0.437787
Lingo2	0.0197362	0.0709157	0.7	0.546	273.149
Mpp3	0.00056927	0.0708578	0.206	0.097	8.75481
Stard7	0.0853458	0.0708541	0.556	0.437	1016.81
Mid1ip1	0.00766149	0.0708219	0.463	0.306	111.122
Cog3	0.000715204	0.0708197	0.167	0.074	10.9662
Gprin3	0.00167681	0.0707978	0.21	0.106	25.3417
Gnaq	0.0170329	0.0707312	0.922	0.743	238.018
BC022687	0.000509541	0.0707281	0.175	0.074	7.84133
Hcn3	0.00614847	0.0707039	0.315	0.194	89.9153
Ppp2r2a	0.0227547	0.0707005	0.541	0.391	312.126
Stc1	0.0500766	0.0706994	0.195	0.129	639.177
Ghr	0.00882473	0.0706983	0.117	0.057	127.244
Endod1	0.0269164	0.0706861	0.502	0.371	365.444
Cbl	0.0328202	0.0706466	0.502	0.369	438.773
Rpn1	0.0216253	0.0705965	0.44	0.306	297.542
Pcdh1	0.000208176	0.0705257	0.249	0.12	3.23026
Sdc3	0.0285919	0.0704986	0.638	0.466	386.706
Fam174b	0.00394217	0.0704892	0.268	0.157	58.4821
Gm26853	0.0183147	0.0703803	0.241	0.154	254.941
Tsen15	0.00162104	0.0703374	0.23	0.123	24.5214
Crkl	0.00285669	0.0701242	0.366	0.223	42.7332
Pim3	0.00110578	0.0701116	0.241	0.126	16.8333
Agpat4	0.0121156	0.0700991	0.615	0.44	171.957
Pgbd5	0.0333393	0.0700398	0.237	0.16	445.146
Mmp15	0.00101602	0.0700108	0.101	0.034	15.4922
Naa25	0.0113102	0.0699732	0.261	0.163	160.967
Nat14	0.00683108	0.0698936	0.451	0.314	99.5016
Dennd5a	0.0052777	0.0698605	0.634	0.434	77.54
Lpcat1	0.00395027	0.0698008	0.393	0.246	58.5983
Uba5	0.0188549	0.0697837	0.502	0.351	262.083
Cep104	0.00340334	0.0697662	0.272	0.157	50.6689
Fpgt	0.0146632	0.0697281	0.198	0.12	206.487
Mrps14	0.0111485	0.0697184	0.634	0.437	158.776
Eef1b2	0.0216005	0.0696333	0.965	0.883	297.266
St8sia2	0.000443793	0.0696079	0.183	0.08	6.83885
Susd2	0.00624997	0.0695549	0.202	0.114	91.3745
Rgs11	0.00540175	0.0695363	0.202	0.114	79.3192
Pcyox1	0.0380203	0.0694448	0.591	0.451	501.564
Sec23b	0.00415569	0.0694429	0.23	0.131	61.5292
Slc35b1	0.00265646	0.069389	0.3	0.174	39.7937
Tmem2	0.000684237	0.0693069	0.144	0.06	10.4976
Rassf8	0.0741642	0.0692769	0.467	0.351	903.765
Rasa4	0.00518964	0.0691584	0.128	0.06	76.2825
Pyurf	0.00110221	0.0691497	0.179	0.083	16.7811
Moxd1	0.000235061	0.0691252	0.047	0.003	3.64416
Nprl2	0.00197738	0.069075	0.206	0.106	29.7893
D1Ertd622e	0.00754514	0.0690451	0.342	0.22	109.533
Eef1e1	0.0238626	0.0690292	0.494	0.366	326.178
Rpl5	0.0839812	0.0689061	0.996	0.949	1002.06
Polr3k	0.0276756	0.0688904	0.424	0.303	375.004
Sdhc	0.017654	0.0688833	0.537	0.374	246.361
Ddx27	0.0045128	0.068864	0.175	0.091	66.663
Anks1b	0.0343354	0.068846	0.782	0.663	457.141
Tmem163	0.0128912	0.0688421	0.14	0.077	182.565
Ppp2r5a	0.00138781	0.0687684	0.14	0.06	21.042
Fam222b	0.00879144	0.0687624	0.261	0.16	126.781
Marcksl1	0.163947	0.0687108	0.93	0.86	1665.05
Nectin1	0.0191799	0.0686787	0.272	0.183	266.352
4930430F08Rik	0.0101941	0.068637	0.253	0.157	145.857
Jtb	0.142051	0.0686194	0.521	0.409	1491.82
Dlg4	0.0272875	0.0685559	0.895	0.789	370.154
Rragd	0.00363622	0.0685305	0.331	0.203	54.056
Trafd1	0.0159669	0.0685241	0.245	0.157	223.872
Itsn2	0.000407939	0.0684793	0.463	0.266	6.29205
Nmnat2	0.0409599	0.0683987	0.724	0.586	536.943
Klhl7	0.0380931	0.0683243	0.642	0.491	502.258
Pdxp	0.0248626	0.068271	0.872	0.726	339.051
Smap1	0.00478717	0.0682576	0.502	0.337	70.5485
Dhcr7	0.0019568	0.0682553	0.23	0.123	29.4831
Vps26b	0.0155401	0.0682533	0.428	0.289	218.246
mt-Nd4	0.00612567	0.068155	1	1	89.6002
Plxnb2	0.0102032	0.0681428	0.304	0.194	145.956
Enpp2	0.00496437	0.0680671	0.195	0.106	73.0805
Rassf5	0.00941156	0.0680647	0.214	0.129	135.103
Rubcn	0.0693653	0.0680077	0.405	0.306	851.459
Mfn2	0.00912469	0.0679935	0.607	0.434	131.204
Pcgf5	0.0137539	0.0679246	0.459	0.309	194.15
Smim1	0.0407506	0.0678754	0.304	0.217	534.444
Eif4g1	0.0228823	0.0678591	0.626	0.457	313.556
Timm22	0.0107329	0.0678589	0.346	0.226	153.17
Smad7	0.00109731	0.0678157	0.198	0.097	16.7099
Acss3	0.00151128	0.0676984	0.051	0.009	22.8853
Commd9	0.0107007	0.0676564	0.241	0.149	152.742
Ppm1l	0.0190997	0.0676432	0.58	0.414	265.276
Arf3	0.0688013	0.0675412	0.953	0.866	845.499
Med14	0.00833702	0.0674777	0.323	0.2	120.495
Dusp3	0.00833694	0.0674056	0.572	0.411	120.502
Cidea	9.62679e-05	0.0673761	0.066	0.009	1.50197
Napb	0.727096	0.0673646	0.961	0.951	1934.08
Zfp410	0.022852	0.0673266	0.241	0.154	313.233
Senp8	0.00155881	0.0673245	0.253	0.14	23.5958
Ssh3	0.00862322	0.0673012	0.179	0.1	124.459
Nob1	0.00806883	0.0672345	0.276	0.171	116.796
Por	0.00714813	0.0672332	0.459	0.3	103.991
Klhl21	0.00272706	0.0672011	0.117	0.049	40.8295
Iscu	0.0453483	0.0671943	0.685	0.546	584.449
Gtpbp3	0.00266399	0.0671766	0.121	0.051	39.9039
Scand1	0.0136381	0.0671733	0.455	0.314	192.584
Pigk	0.0610783	0.0671325	0.506	0.369	761.585
Arrb2	0.00683558	0.067129	0.288	0.18	99.5602
Orc2	0.00547848	0.0671007	0.222	0.126	80.3694
Itih3	0.0077648	0.0670722	0.089	0.037	112.597
Cflar	0.000566727	0.0670692	0.125	0.046	8.71627
Ap3b2	0.0330292	0.067059	0.424	0.306	441.238
Sec61b	0.147984	0.0670434	0.712	0.6	1542.88
Leprotl1	0.0156953	0.0670277	0.459	0.32	220.267
Nuak1	0.00597213	0.0670017	0.3	0.186	87.4141
Gnaz	0.0287272	0.0668944	0.844	0.68	388.335
Rpp21	0.0180549	0.0668607	0.475	0.329	251.613
Rhobtb2	0.0359365	0.0668483	0.335	0.24	476.626
Foxg1	0.0887064	0.0668104	0.623	0.489	1044.43
Tet2	0.0224149	0.0668032	0.307	0.206	307.801
Tmed7	0.0194051	0.0667722	0.689	0.514	268.915
Rcan3	0.0135788	0.0667389	0.451	0.314	191.828
9930104L06Rik	0.00515946	0.0667163	0.156	0.08	75.844
Lysmd1	0.0182442	0.066707	0.148	0.086	254.032
A230050P20Rik	0.0268794	0.0666539	0.428	0.303	364.968
Sema4a	0.022936	0.0665959	0.253	0.166	314.178
Lman1	0.0017704	0.0665401	0.397	0.234	26.7401
Lin37	0.00507295	0.0665347	0.272	0.16	74.6079
1810022K09Rik	0.00296477	0.0665129	0.514	0.34	44.3056
Camkk2	0.0162015	0.0663941	0.385	0.26	226.95
Gm42517	0.000775683	0.0663006	0.136	0.054	11.8804
Pigp	0.00746539	0.0662708	0.292	0.183	108.412
Yeats2	0.061472	0.0662664	0.362	0.271	766.002
Ganab	0.0884473	0.0662498	0.467	0.366	1044.74
Pbrm1	0.0309039	0.0662473	0.817	0.654	415.503
Nufip2	0.0474088	0.0662018	0.385	0.28	608.682
Xpnpep1	0.000698123	0.0661949	0.156	0.066	10.7078
Armc6	0.00211754	0.0661762	0.202	0.106	31.8585
Chchd5	0.0113577	0.0661126	0.3	0.191	161.586
Uba3	0.0143423	0.0660862	0.436	0.297	202.141
Uqcr11	0.0480565	0.0660762	0.829	0.691	616.276
Sfr1	0.0270961	0.0660488	0.634	0.489	367.722
1810058I24Rik	0.00760074	0.0660006	0.339	0.214	110.302
Cthrc1	0.0448081	0.0659973	0.195	0.131	578.025
Ids	0.0689568	0.0659842	0.825	0.711	847.065
Srf	0.00151909	0.0659825	0.218	0.114	23.0006
Hrk	0.0410477	0.0659669	0.214	0.143	537.889
Ngef	0.0303105	0.0659207	0.21	0.137	408.435
Galnt7	0.00861232	0.0658779	0.175	0.097	124.31
Sdk1	0.00372099	0.065869	0.105	0.043	55.2902
Sgta	0.0484908	0.0658577	0.514	0.383	621.362
Ulk1	0.0146897	0.0658527	0.354	0.24	206.846
Arhgef7	0.0151089	0.065753	0.498	0.349	212.507
Manf	0.0141894	0.065744	0.486	0.334	200.042
Chmp1a	0.021435	0.0657297	0.331	0.223	295.224
3110043O21Rik	0.0137727	0.0656954	0.323	0.214	194.375
Nars2	0.00214415	0.0656612	0.113	0.046	32.2501
Foxp4	0.0239426	0.0656567	0.37	0.257	327.175
Txndc5	0.0742922	0.0656276	0.381	0.289	904.879
Stk3	0.00537303	0.0656267	0.21	0.117	78.9137
Mgme1	7.62733e-05	0.0655731	0.074	0.011	1.19177
Plek	0.002799	0.0655705	0.125	0.054	41.8786
Isyna1	0.000908366	0.0655216	0.272	0.146	13.8744
Ift20	0.105002	0.0654976	0.763	0.626	1182.75
Diaph3	0.00863802	0.0654891	0.148	0.077	124.664
Hcrtr1	3.67712e-05	0.0654132	0.078	0.011	0.576389
Eaf1	0.00166263	0.065365	0.183	0.089	25.1356
Rps27rt	0.0481511	0.0653593	0.969	0.917	617.394
Mtus1	0.0297241	0.0653485	0.304	0.206	401.037
Grb10	0.152749	0.065291	0.821	0.677	1579.43
Bcas2	0.100046	0.0652708	0.642	0.526	1136.43
Fam50a	0.00264594	0.0652351	0.198	0.103	39.6388
Fam20b	0.0758025	0.0652341	0.595	0.451	919.787
Grb14	0.00296079	0.0651314	0.136	0.063	44.2491
Trir	0.0501519	0.0651191	0.591	0.454	639.938
Armcx5	0.0134686	0.0650581	0.272	0.174	190.365
Gpc1	0.0359298	0.0650328	0.23	0.154	476.573
Dock3	0.0831428	0.0649535	0.51	0.391	993.391
Serf1	0.0504073	0.0649054	0.521	0.397	642.643
Ino80	0.00635694	0.0648259	0.187	0.103	92.8749
Mis12	0.00698571	0.0648068	0.23	0.129	101.684
Rhoq	0.000346914	0.0648015	0.16	0.063	5.35879
Rbpj	0.00552844	0.0647837	0.28	0.171	81.069
Bcl2l13	0.00273208	0.0647711	0.226	0.126	40.9019
Flot1	0.00519986	0.0647348	0.346	0.211	76.4276
Mmp16	0.062759	0.0647239	0.319	0.234	780.22
Zfp316	0.00119977	0.0647115	0.16	0.071	18.2377
Parvb	0.0161288	0.0647051	0.202	0.123	226.045
Efr3a	0.0537856	0.0646671	0.475	0.351	681.733
Trmt2a	0.00543603	0.0645794	0.222	0.126	79.8008
Sema3f	0.00126159	0.0645456	0.109	0.04	19.1585
Trim44	0.0325693	0.0645427	0.864	0.674	435.712
Fam208a	0.0489194	0.0644529	0.389	0.28	626.168
Ppp1r2	0.0226385	0.0644311	0.759	0.571	310.578
Smim20	0.00947709	0.0643724	0.346	0.226	135.996
Krcc1	0.00236454	0.0642507	0.175	0.086	35.487
Stx3	0.0224644	0.0642442	0.304	0.2	308.414
Zfp512b	0.0100804	0.064233	0.268	0.166	144.281
Emb	0.0289631	0.0642218	0.409	0.274	391.321
Scp2	0.023146	0.0641506	0.42	0.297	316.938
Trim24	0.00654933	0.0641095	0.226	0.131	95.6072
Tspan17	0.0110122	0.064091	0.393	0.263	156.935
Taok3	0.0111998	0.06401	0.829	0.714	159.485
Klhl5	0.00324495	0.0639898	0.132	0.06	48.3854
Tmem189	0.00296826	0.063988	0.226	0.123	44.3488
Dstyk	0.0464258	0.063947	0.42	0.303	597.128
D17Wsu92e	0.0147717	0.0639269	0.42	0.303	207.941
B4galt6	0.140665	0.0639096	0.942	0.906	1479.93
Hist1h4d	0.000195108	0.063902	0.062	0.009	3.02983
Slc44a1	0.00255327	0.0638976	0.121	0.051	38.2761
Tars2	0.000898845	0.0638155	0.171	0.077	13.7326
Zfp771	0.00953078	0.0638111	0.366	0.237	136.7
Lrrc3b	0.00300231	0.063794	0.253	0.143	44.8425
Wnt4	0.00941159	0.063775	0.152	0.083	135.094
Tmem246	0.0619951	0.0637639	0.424	0.311	771.962
Eef2	0.0414397	0.0637314	0.973	0.906	542.363
Galnt17	0.00892821	0.0637122	0.37	0.24	128.522
Rpl27-ps3	0.00851966	0.063706	0.397	0.26	123.024
Kalrn	0.0628411	0.0637021	0.654	0.503	780.989
Jmjd1c	0.0187548	0.0637002	0.591	0.414	260.804
Tor1aip1	0.0403595	0.0636799	0.187	0.123	529.84
Slc12a2	0.0334213	0.063537	0.296	0.206	446.107
Dhdh	0.00333896	0.0634802	0.156	0.074	49.7372
Wbp1l	0.00458204	0.0634586	0.175	0.091	67.6538
Fam161b	0.0224994	0.0634502	0.226	0.143	308.849
Ube3c	0.0574473	0.0633532	0.498	0.377	721.653
Ttc28	0.0198411	0.0633488	0.163	0.097	274.462
Setd2	0.00427437	0.0633486	0.502	0.326	63.2479
Tbc1d5	0.0163556	0.0633205	0.16	0.091	228.995
Gskip	0.0358689	0.0632916	0.463	0.331	475.909
Zfc3h1	0.00817608	0.0632385	0.257	0.157	118.267
Anapc10	0.00400045	0.0632352	0.187	0.097	59.3227
Ehd4	0.00041592	0.0632065	0.191	0.083	6.4139
Adgrb3	0.0826754	0.0632018	0.739	0.6	988.964
Ctdnep1	0.00908398	0.0631753	0.358	0.229	130.655
Preb	0.00788097	0.0631305	0.339	0.223	114.203
Tvp23b	0.00542874	0.0630996	0.335	0.214	79.6994
Acbd3	0.0102955	0.0630923	0.327	0.211	147.185
mt-Atp6	0.000629554	0.0630844	1	1	9.66429
L2hgdh	0.00177064	0.0630615	0.237	0.126	26.7419
Ikzf4	0.00476969	0.0630334	0.272	0.16	70.3005
Brd4	0.0372925	0.063027	0.634	0.471	492.82
Rrbp1	0.0082215	0.0630213	0.463	0.311	118.883
Arfip1	0.00189254	0.0628984	0.163	0.077	28.5584
Brf1	0.00434104	0.0628889	0.148	0.071	64.2039
Pikfyve	0.00319139	0.0628531	0.292	0.171	47.5964
Pigq	0.00751041	0.0627443	0.245	0.146	109.044
Slc41a1	0.0303504	0.0627418	0.152	0.091	408.911
Txlng	0.0132583	0.0627095	0.292	0.186	187.579
Ppdpf	0.00568885	0.0625828	0.654	0.46	83.3759
Gpd1l	0.0130977	0.0625714	0.37	0.24	185.359
Actn1	0.0251497	0.0625702	0.28	0.189	342.765
L1cam	0.0308241	0.0625676	0.767	0.64	414.522
Fah	0.00603853	0.0625091	0.078	0.029	88.3558
Tatdn1	0.0398935	0.0624984	0.63	0.466	524.2
Cnksr2	0.00163955	0.0624935	0.261	0.14	24.7966
Abraxas2	0.0735939	0.0624812	0.42	0.311	897.625
Dr1	0.0139417	0.0623865	0.272	0.174	196.647
Map1lc3b	0.0634605	0.0623769	0.611	0.477	787.481
Zfp36l2	0.000539184	0.0623336	0.074	0.017	8.29643
Adarb2	0.00183799	0.0622	0.549	0.346	27.7407
Cystm1	0.00253117	0.062199	0.319	0.18	37.9549
Spire1	0.0494715	0.06219	0.459	0.34	632.394
Ap1s3	0.000191536	0.06218	0.062	0.009	2.97493
Ranbp2	0.00458842	0.0621106	0.253	0.143	67.7113
Kansl3	0.0439916	0.0620314	0.514	0.366	568.371
Nrep	0.0298736	0.0620247	0.21	0.137	402.875
Zfp282	0.0103598	0.0619759	0.121	0.06	148.052
Eif4ebp2	0.00589286	0.0619583	0.288	0.174	86.2891
Oprl1	0.0482155	0.0619493	0.556	0.431	618.171
Bsdc1	0.113964	0.0619267	0.428	0.343	1262.15
Ncam1	0.0814151	0.061845	1	0.994	976.248
4933407L21Rik	0.00168387	0.0618203	0.097	0.034	25.4466
Aifm2	0.002102	0.0617281	0.086	0.029	31.6309
Iah1	0.00225161	0.0616908	0.086	0.029	33.8327
Stox2	0.0240864	0.0616339	0.689	0.506	328.996
D10Wsu102e	0.0511877	0.0616042	0.401	0.289	652.029
Tmem164	0.00809748	0.0614795	0.136	0.069	117.179
Pomgnt2	0.00902073	0.061458	0.335	0.214	129.79
R3hdm4	0.0605188	0.0613593	0.327	0.24	755.758
Slf2	0.00561612	0.0613499	0.556	0.366	82.3323
Nell1	0.0927926	0.0613383	0.475	0.369	1085.49
Usp16	0.00714164	0.0613288	0.311	0.191	103.918
Atf2	0.0437207	0.0612794	0.813	0.617	565.264
Nrxn2	0.0628918	0.0612098	0.988	0.931	781.431
Pcnx	0.0209683	0.0611744	0.319	0.211	289.132
Gsk3b	0.135561	0.0611465	0.965	0.929	1446.3
Sphk2	0.00567851	0.0611169	0.136	0.066	83.2299
Psmd3	0.00301174	0.0610851	0.358	0.217	44.9803
Ccdc6	0.0203403	0.0610198	0.447	0.317	280.88
Zfp292	0.0670434	0.0610135	0.553	0.431	826.981
Prpsap2	0.0464549	0.0609447	0.296	0.211	597.364
Chst2	0.0347128	0.0609292	0.179	0.114	461.889
Gspt2	0.00900044	0.0608932	0.268	0.163	129.516
Aup1	0.00585533	0.0607929	0.331	0.209	85.7572
Exosc1	0.00521552	0.0607883	0.253	0.149	76.6525
Rnf145	0.0130137	0.0607462	0.451	0.303	184.209
Adgrl1	0.208648	0.0607372	0.914	0.811	1970.27
Cadps	0.11877	0.0607086	0.833	0.703	1300.53
Spag6l	0.00439917	0.0607085	0.14	0.066	65.0418
Ercc4	0.0167553	0.0606909	0.175	0.103	234.305
Nat8f1	0.0184617	0.0606704	0.128	0.069	256.839
2810006K23Rik	0.0032946	0.0606517	0.132	0.06	49.0961
Capns1	0.236079	0.0606449	0.669	0.554	2102.05
Dhx32	0.00329344	0.0606225	0.206	0.109	49.0821
Atp6v1d	0.0674791	0.0606193	0.735	0.577	831.613
Gatad2b	0.0769639	0.0605591	0.79	0.62	930.801
Slc35f6	0.0022856	0.0604964	0.16	0.074	34.3251
Ambra1	0.0019435	0.0604815	0.218	0.114	29.2846
Ccnk	0.0115201	0.0604734	0.226	0.137	163.804
H2-T22	0.0138851	0.0604707	0.101	0.049	195.905
Nhlrc1	0.00839097	0.0604626	0.218	0.129	121.233
Cckar	0.000316078	0.0604564	0.078	0.017	4.88784
Ublcp1	0.0644007	0.0604249	0.28	0.206	797.474
Tmem151b	0.0123047	0.0603985	0.311	0.209	174.529
Gm30025	0.0041613	0.0603725	0.156	0.077	61.608
Trip11	0.0844061	0.0603454	0.463	0.346	1006.37
Ndrg2	0.0129957	0.0603027	0.319	0.206	183.98
Plekha3	0.0285812	0.0602915	0.304	0.206	386.589
Mrpl14	0.0131226	0.0602813	0.307	0.194	185.697
Mkl1	0.0304527	0.0602447	0.156	0.094	410.168
Kansl1	0.0560556	0.0602185	0.479	0.351	706.413
Bmp1	0.000230224	0.0602137	0.097	0.026	3.56985
Zc3h15	0.0444447	0.0601815	0.755	0.571	573.692
Zdhhc23	0.000641418	0.0601806	0.187	0.083	9.84513
Rbfox3	0.146144	0.0601571	0.759	0.651	1527.2
Etf1	0.0083472	0.0600955	0.545	0.36	120.617
Cltc	0.101266	0.0600887	0.934	0.831	1147.65
Shisa6	4.84197e-06	0.0600675	0.058	0	0.0763434
St3gal2	0.00876909	0.0600308	0.37	0.237	126.485
Ppp2ca	0.0235146	0.060005	0.868	0.726	321.726
Mgarp	0.0990707	0.0599753	0.008	0	1149.12
Huwe1	0.108471	0.0599713	0.763	0.634	1214.55
Sac3d1	0.0325578	0.0599584	0.191	0.123	435.591
Prr14l	0.00218258	0.0599433	0.191	0.094	32.8129
Dpy19l4	0.0115527	0.059922	0.412	0.277	164.233
Suz12	0.0095661	0.0599122	0.409	0.263	137.168
Mrpl54	0.0377527	0.0599066	0.51	0.383	498.298
Pnmal1	0.085536	0.0598737	0.895	0.723	1018.39
Fn3krp	0.0477954	0.0598693	0.109	0.063	613.31
Mark2	0.00666551	0.0597885	0.549	0.383	97.2365
Zhx1	0.0051148	0.0597831	0.37	0.237	75.208
Tspyl4	0.0683075	0.0597513	0.949	0.889	840.182
Ube2g1	0.00113803	0.0597322	0.292	0.154	17.314
1700021F05Rik	0.014548	0.059693	0.195	0.114	204.938
Chrnb2	0.0424104	0.0596244	0.35	0.246	552.65
Pttg1ip	0.00160122	0.0596116	0.175	0.083	24.2265
Gm48682	0.000442589	0.0595897	0.07	0.014	6.82074
Zfp777	0.0216723	0.0595793	0.121	0.066	298.081
Atic	0.0145198	0.0595586	0.23	0.14	204.554
Ctnnbip1	0.00361735	0.0595243	0.498	0.32	53.7899
Coro1c	0.109778	0.0595151	0.56	0.446	1226.23
Snhg6	0.0227175	0.0594759	0.588	0.431	311.638
Kcnh2	0.0266927	0.0594617	0.198	0.126	362.62
Phf2	0.0132805	0.0594413	0.296	0.186	187.853
Lrp1	0.0445735	0.0594199	0.712	0.566	575.266
Elof1	0.0328857	0.0594116	0.743	0.543	439.517
Nbea	0.07517	0.0593986	0.829	0.683	913.767
Lrrc55	0.0346466	0.0593311	0.179	0.114	461.077
Morf4l2	0.0912858	0.0593206	0.922	0.831	1070.51
Adck5	0.00230724	0.0592469	0.195	0.097	34.6409
Trrap	0.00370391	0.0592131	0.525	0.349	55.0437
Mxd4	0.0321381	0.0591774	0.424	0.3	430.393
Gapvd1	0.0485678	0.0591563	0.58	0.463	622.25
Shd	0.0652432	0.0591536	0.393	0.291	806.928
Larp1	0.0630236	0.0591349	0.595	0.446	782.627
Csad	0.0205912	0.0590841	0.276	0.177	284.117
Plxna3	0.0113872	0.0590644	0.21	0.123	161.982
Foxk2	0.0339888	0.0590302	0.307	0.214	452.867
Pnma3	0.104758	0.059029	0.541	0.429	1180.52
Gm17259	0.000776001	0.0590174	0.113	0.04	11.8845
Rsph4a	0.0328344	0.0590167	0.136	0.08	438.898
P2rx5	0.000426588	0.0590121	0.035	0	6.57713
Gm26894	0.00059036	0.0589221	0.074	0.017	9.07206
Pcid2	0.000483101	0.0588521	0.105	0.034	7.43734
Hspd1	0.0236072	0.0588425	0.681	0.531	322.853
Fbxw5	0.0084455	0.0588362	0.389	0.243	121.978
Rnf11	0.0450295	0.0588341	0.973	0.886	580.655
Ecd	0.0078132	0.0587649	0.28	0.174	113.26
Stx1a	0.00501574	0.0587472	0.342	0.217	73.8066
Gpr158	0.0065556	0.058682	0.335	0.211	95.6856
Ufsp2	0.00270024	0.0586183	0.37	0.226	40.4334
Reep2	0.0837495	0.0585386	0.595	0.466	999.55
Cox18	0.00866056	0.0585384	0.195	0.111	124.981
Zfp120	0.0101193	0.0585328	0.268	0.163	144.818
5730480H06Rik	0.00848766	0.0585293	0.136	0.069	122.57
Adk	0.0198303	0.0585223	0.183	0.109	274.333
Rims4	0.00231742	0.0585019	0.315	0.183	34.7914
Letm1	0.00682981	0.0584618	0.288	0.171	99.4898
Smug1	0.00201077	0.0584372	0.105	0.04	30.2843
Fam219a	0.0415279	0.0583217	0.58	0.446	543.476
Net1	0.00142682	0.0583169	0.074	0.02	21.6263
Rhot1	0.0299129	0.058265	0.331	0.231	403.315
Arap2	0.000584458	0.0582625	0.074	0.017	8.98429
Ubr4	0.00872281	0.0582249	0.479	0.323	125.844
Sparcl1	0.00310826	0.0582208	0.167	0.083	46.3908
Peg3	0.0339596	0.0581914	1	0.994	452.511
A430027H14Rik	0.00132489	0.0581821	0.074	0.02	20.1038
Spcs3	0.0161894	0.0581466	0.323	0.209	226.829
Mrpl4	0.0629117	0.0581218	0.265	0.191	781.427
Scaf8	0.0286739	0.058121	0.257	0.169	387.757
Plpp7	0.0104171	0.0581124	0.125	0.063	148.829
Chid1	0.0173341	0.0580736	0.362	0.249	242.088
Gm16701.1	0.000677622	0.0580718	0.105	0.034	10.3974
Haus8	0.0102267	0.0580654	0.195	0.111	146.221
Tspan6	0.0396332	0.0580358	0.381	0.274	521.058
Prps2	0.0043153	0.0580148	0.171	0.089	63.8363
Tmed4	0.0106437	0.057998	0.588	0.397	151.97
Slc29a4	0.00191973	0.0579937	0.272	0.151	28.9611
Tlnrd1	0.00813876	0.0579408	0.21	0.12	117.752
Tbc1d19	0.00309561	0.0579348	0.156	0.074	46.2082
Klhl2	0.0134169	0.0579138	0.459	0.3	189.689
Cbwd1	0.00452843	0.057848	0.093	0.037	66.8895
Snrpa	0.0461458	0.0578237	0.265	0.186	593.758
Rnf32	0.00306473	0.0578126	0.175	0.089	45.7625
Tacc1	0.0750484	0.057807	0.564	0.443	912.814
Cab39l	0.00834623	0.0577975	0.315	0.194	120.611
Dnajc19	0.0215306	0.0577568	0.494	0.351	296.391
Gpr137c	0.0497093	0.0577389	0.304	0.214	635.186
Trak2	0.0267595	0.0577249	0.23	0.154	363.501
Miat	0.0772929	0.0577188	0.588	0.466	934.007
Dxo	0.0125773	0.0576971	0.128	0.066	178.27
Rabl2	0.0323992	0.0576498	0.35	0.243	433.631
Htr1f	4.5321e-05	0.0576437	0.047	0	0.709818
Gucy1b1	0.0180022	0.0576157	0.424	0.286	250.933
Ncor2	0.0297644	0.0576021	0.467	0.331	401.462
Rpl7a-ps5	0.000384087	0.0575533	0.058	0.009	5.92761
Nfil3	0.000561396	0.0575271	0.074	0.017	8.6354
Enox1	0.00406628	0.0574188	0.132	0.06	60.2623
Pdlim7	0.0367376	0.0573967	0.475	0.34	486.333
Rbm15	0.00496228	0.057359	0.187	0.1	73.0547
Rbfa	0.0225159	0.057356	0.202	0.126	309.054
Pdia6	0.0404451	0.0573452	0.49	0.371	530.762
Mdn1	0.00437967	0.0573405	0.311	0.189	64.7666
Gm5617	0.00542496	0.0573251	0.206	0.114	79.6492
Tns3	0.000315941	0.0573245	0.066	0.011	4.88603
Vwa5b1	0.0214731	0.0572763	0.152	0.086	295.663
Mkrn1	0.0521528	0.0572561	0.455	0.329	663.332
Gabrg1	0.0372162	0.0572504	0.549	0.423	491.924
Creb1	0.0432497	0.0572458	0.346	0.243	559.694
Scrn1	0.0650545	0.0572301	0.821	0.714	804.725
Clstn3	0.0766831	0.0571858	0.77	0.614	927.943
Ndfip2	0.0787663	0.0571636	0.568	0.434	949.213
Ltbp4	0.000944849	0.0571152	0.233	0.117	14.425
Meis3	0.0137109	0.0570328	0.335	0.22	193.584
Cep19	0.00404109	0.0570117	0.541	0.34	59.9092
Adra2a	0.157437	0.0569923	0.171	0.126	1614.67
Cyp20a1	0.0674225	0.0569754	0.089	0.051	830.982
Carmil3	0.0071835	0.0569629	0.409	0.271	104.491
Nudt17	0.00141369	0.0569512	0.074	0.02	21.4302
Ss18l1	0.0391078	0.05694	0.444	0.323	514.737
Dcp1b	0.0025402	0.0569322	0.136	0.06	38.0852
Srrt	0.0314037	0.0569027	0.444	0.317	421.532
AW551984	0.0180369	0.0568819	0.887	0.743	251.38
Gm2237	0.000197524	0.0568691	0.062	0.009	3.06676
Mrps12	0.13451	0.056837	0.619	0.491	1437.91
Mfsd14b	0.00322546	0.0567299	0.35	0.209	48.1013
Wdyhv1	0.00525674	0.0567208	0.14	0.069	77.2425
Tekt1	0.0102092	0.0567149	0.132	0.066	146.033
Homer1	0.0218223	0.0567073	0.307	0.206	300.057
Klhdc9	0.00119828	0.056704	0.086	0.026	18.2174
Nabp1	0.00911958	0.0566915	0.132	0.066	131.14
Focad	0.000553217	0.0565934	0.183	0.08	8.51069
Plod3	0.0199127	0.0565909	0.183	0.109	275.372
Sstr1	0.00279502	0.0565888	0.058	0.014	41.8219
Aph1b	0.0980279	0.0564982	0.249	0.186	1138.79
Gng5	0.00494573	0.0564486	0.288	0.171	72.816
Tfam	0.00649942	0.0564319	0.315	0.194	94.885
Pibf1	0.0055259	0.0564147	0.218	0.12	81.0373
Fam57b	0.0189278	0.0563609	0.284	0.186	263.04
Bap1	0.0156365	0.0563142	0.315	0.206	219.489
Epb41l3	0.158467	0.0563086	0.638	0.534	1622.55
Cops7a	0.011472	0.0562973	0.514	0.346	163.144
Gtf2a2	0.0323034	0.0562358	0.537	0.394	432.51
Gt(ROSA)26Sor	0.012686	0.056191	0.323	0.203	179.735
Anp32e	0.00762172	0.0561863	0.436	0.283	110.576
Metap1	0.0175057	0.0561752	0.401	0.274	244.345
Srp68	0.0318925	0.0561725	0.374	0.26	427.391
G3bp2	0.0665089	0.0561254	0.969	0.891	821.252
Dnajb14	0.139793	0.0561183	0.794	0.669	1473.14
Tmed9	0.0789263	0.0560891	0.634	0.494	950.588
Smarcc1	0.0133659	0.0560696	0.634	0.44	188.994
Garem1	0.00100401	0.0560659	0.101	0.034	15.3152
Rap2c	0.00228789	0.0560356	0.253	0.14	34.3572
Glul	0.0157089	0.0559876	0.362	0.24	220.443
Zfp655	0.0016374	0.0559806	0.268	0.146	24.7657
Gpr162	0.0139035	0.0559015	0.35	0.231	196.151
Vat1l	0.262809	0.05586	0.84	0.777	2080.66
Txnrd1	0.0136961	0.0558305	0.377	0.249	193.389
Fiz1	0.00808234	0.0557923	0.128	0.063	116.984
Arid3b	0.00148302	0.0557152	0.062	0.014	22.4647
Ndufs4	0.0474346	0.055627	0.463	0.34	608.965
Thoc3	0.00483015	0.0555841	0.377	0.237	71.1529
Gna13	0.0226086	0.0555824	0.288	0.189	310.235
Map2k2	0.0446616	0.0555802	0.553	0.409	576.269
Dtx1	0.0336146	0.0555476	0.475	0.343	448.385
Tubg1	0.0113329	0.0555138	0.125	0.063	161.268
Samd8	0.1067	0.0555002	0.494	0.377	1197.92
Arntl2	0.0120256	0.0554937	0.125	0.063	170.703
Nup35	0.00184039	0.055405	0.082	0.026	27.7752
Rnf165	0.0455289	0.0553953	0.467	0.34	586.503
Abhd17c	0.0135438	0.0553303	0.226	0.134	191.36
Npc1	0.0108038	0.0553232	0.315	0.203	154.106
Snrpc	0.0201556	0.0552598	0.253	0.16	278.43
Rusc1	0.0394006	0.0551988	0.354	0.246	518.197
Sec22b	0.0216411	0.055175	0.409	0.283	297.739
Gmpr2	0.0201125	0.0550914	0.214	0.134	277.894
Entpd5	0.00508343	0.0550871	0.171	0.089	74.757
Map3k15	0.00337075	0.0550754	0.062	0.017	50.2039
Srpk1	0.00799822	0.0550065	0.416	0.274	115.83
Sall2	0.0222369	0.054965	0.459	0.323	305.424
Nipal2	0.0161995	0.0548103	0.21	0.129	226.938
Tbc1d4	0.000114697	0.0547793	0.058	0.006	1.7879
Clock	0.0268303	0.0547586	0.669	0.517	364.356
Sbds	0.00258366	0.0547142	0.377	0.226	38.7238
Tgfbrap1	0.000207243	0.0546882	0.222	0.1	3.21621
BC049715	0.00171848	0.0546849	0.078	0.023	25.9627
Pdha1	0.192226	0.0546554	0.545	0.437	1852.1
Ptrh1	0.00716375	0.0546296	0.062	0.02	104.211
Klhl24	0.157708	0.0546244	0.591	0.489	1617.13
Zfyve19	0.00600901	0.0545794	0.156	0.08	87.9358
Uba2	0.016238	0.0545586	0.459	0.323	227.446
Ube2v2	0.178495	0.0545294	0.767	0.657	1764.96
Chrd	0.00157934	0.0545082	0.093	0.031	23.9034
Palm3	0.00134347	0.0544668	0.074	0.02	20.3831
Nicn1	0.0542109	0.0544539	0.696	0.531	686.581
Actr10	0.0797754	0.0544524	0.603	0.471	959.699
Akr1b3	0.00796791	0.0544523	0.183	0.1	115.423
Tmem258	0.0552165	0.0544466	0.358	0.263	697.385
Mfap3l	0.00891359	0.0544303	0.183	0.103	128.329
Sumo2	0.0216639	0.0544054	0.969	0.894	298.009
Erp44	0.0183451	0.0543928	0.202	0.123	255.345
Acox1	0.0397563	0.0543834	0.568	0.437	522.437
P4hb	0.0107003	0.054347	0.564	0.389	152.746
Slc25a51	0.172229	0.0543298	0.654	0.534	1723.84
Abhd3	0.0195405	0.0542862	0.082	0.037	270.675
Ttc21b	0.00332627	0.0542281	0.276	0.157	49.5515
Slc16a6	0.00496816	0.054206	0.054	0.014	73.1313
Asic1	0.00197911	0.0541935	0.409	0.251	29.8133
Zfp934	0.00666808	0.0541818	0.136	0.066	97.2673
Ddx17	0.110161	0.0541695	0.84	0.731	1229.62
Slc48a1	0.0510139	0.0541387	0.447	0.323	650.07
Snx1	0.0202139	0.0541338	0.3	0.197	279.215
Ctsz	0.0101562	0.0541289	0.16	0.086	145.335
Fbxw11	0.113028	0.0541154	0.576	0.443	1254.04
Cars	0.0154494	0.0541068	0.257	0.16	217.049
Mier2	0.007476	0.0541053	0.191	0.106	108.551
Kin	0.00362064	0.0540733	0.233	0.129	53.8353
Fuk	0.0020361	0.0540444	0.101	0.037	30.6514
Atp13a2	0.0135612	0.0540415	0.44	0.303	191.593
Ooep	0.000789349	0.0539624	0.054	0.009	12.0841
Abcf1	0.0100302	0.0539593	0.323	0.209	143.602
Pcnx2	0.0122108	0.0539507	0.198	0.114	173.234
Slc2a12	0.00116769	0.0539264	0.086	0.026	17.7594
Timm9	0.0956682	0.0539114	0.77	0.629	1115.4
Trhr	0.0170132	0.0539081	0.218	0.137	237.759
Zfp516	0.00634222	0.0538971	0.101	0.043	92.6789
Sun1	0.0442435	0.0538821	0.342	0.243	571.493
Inhba	0.0137448	0.0538262	0.043	0.011	194.035
Mapk8ip1	0.063161	0.0537762	0.712	0.563	784.08
Prag1	0.0109559	0.0537691	0.117	0.057	156.198
Npm3	0.0154581	0.0537615	0.195	0.114	217.156
Frs2	0.0152989	0.05374	0.23	0.143	215.056
Prkag2	0.00699625	0.0537357	0.311	0.191	101.83
Rtl5	0.0181266	0.0537204	0.428	0.297	252.54
Vac14	0.011987	0.0537171	0.148	0.08	170.168
Commd6	0.00676605	0.0537057	0.35	0.226	98.6287
Htr1d	5.52068e-05	0.0537051	0.054	0.003	0.863987
Dynlt1a	0.00814244	0.0536037	0.315	0.194	117.797
Rit1	0.000768346	0.0536018	0.202	0.097	11.7711
Gm4419	0.0012271	0.0535997	0.101	0.034	18.6434
Zfp592	0.0181228	0.0534965	0.125	0.066	252.504
Lactb2	0.00506485	0.0534898	0.054	0.014	74.504
Slc30a10	0.00470831	0.0534865	0.198	0.106	69.4381
Rbm14	0.00217614	0.0534762	0.101	0.037	32.7183
Rad21	0.0231435	0.0534484	0.599	0.446	316.928
Madd	0.0656418	0.0533584	0.654	0.483	811.398
Secisbp2	0.0266484	0.0533548	0.167	0.1	362.045
Pelp1	0.00547252	0.053334	0.125	0.057	80.2874
Ppp2r2d	0.0487347	0.0533173	0.412	0.3	624.145
Nfya	0.0044266	0.0533022	0.089	0.034	65.4207
Cep41	0.0239417	0.0532859	0.16	0.094	327.187
Zfp668	0.00949479	0.0532752	0.121	0.057	136.231
Rin2	0.00337217	0.053251	0.078	0.026	50.2217
Wdr70	0.0325571	0.0532393	0.268	0.177	435.614
Cmtm4	0.0453306	0.0532237	0.409	0.297	584.266
Arpc5	0.0166829	0.0531994	0.767	0.606	233.36
Donson	0.0184334	0.0531824	0.132	0.071	256.463
Smndc1	0.00661402	0.053177	0.331	0.203	96.5051
Zfp938	0.00677566	0.0531652	0.307	0.186	98.7621
Tmem241	0.0104134	0.0531185	0.109	0.051	148.787
Eps15	0.0856293	0.0531115	0.428	0.32	1019.33
Rab12	0.0318506	0.0531092	0.603	0.431	426.925
Cactin	0.0178984	0.0530981	0.16	0.091	249.539
Pomk	0.0149066	0.0530491	0.21	0.126	209.721
Zfp511	0.0406137	0.0530457	0.163	0.103	532.852
Zmynd19	0.0139244	0.0530365	0.198	0.117	196.432
Avpi1	0.00674468	0.0530175	0.191	0.103	98.3239
Ybx1	0.027915	0.0529914	0.708	0.529	378.08
Rab3ip	0.00913483	0.0529534	0.136	0.069	131.322
Snx11	0.0347643	0.0528927	0.136	0.08	462.505
Hdgf	0.0828895	0.0528759	0.778	0.663	991.027
Grik4	0.00455749	0.0528607	0.222	0.123	67.2959
Eif3a	0.0675577	0.0528574	0.809	0.657	832.514
Gm3448	0.00474681	0.0528173	0.152	0.074	69.9774
Mpv17	0.0724556	0.0527857	0.346	0.251	885.407
Jakmip1	0.0327558	0.0527777	0.619	0.454	438.043
Smarcal1	0.0069812	0.0527097	0.109	0.049	101.625
Ttc9c	0.0563432	0.0526912	0.296	0.209	709.361
Kcnj3	0.114621	0.0526431	0.307	0.237	1267.37
Pcif1	0.0265105	0.0526428	0.521	0.374	360.224
Ranbp6	0.0368351	0.0526112	0.339	0.237	487.549
Ddr1	0.00367132	0.0526001	0.167	0.083	54.5669
Rdh10	0.00279004	0.0525129	0.109	0.043	41.7501
Arcn1	0.0362665	0.0525047	0.63	0.457	480.749
Tmem255a	0.0992424	0.0525022	0.914	0.82	1129.48
Ptpn23	0.00574264	0.0524914	0.175	0.091	84.1583
Atf1	0.0125839	0.0524363	0.21	0.126	178.352
Coro7	0.0410747	0.0524319	0.195	0.126	538.202
Med8	0.0235588	0.0523655	0.276	0.18	322.284
4933406B17Rik	0.000317745	0.0523625	0.066	0.011	4.91297
Tmem135	0.0104843	0.0523138	0.358	0.237	149.768
Gm15446	0.0132187	0.0522842	0.152	0.083	187.032
Arhgap1	0.0563879	0.0522587	0.385	0.286	709.754
Tmem178	0.00207512	0.0521937	0.066	0.017	31.2285
Gstm6	0.0277167	0.0521922	0.265	0.177	375.478
Slc7a5	0.00295515	0.0521377	0.206	0.106	44.1736
Irf2bpl	0.164568	0.0520326	0.471	0.371	1669.71
Rnf113a2	0.0123701	0.052022	0.23	0.14	175.433
Fank1	0.00192497	0.0519897	0.113	0.043	29.0209
Elac1	0.0658963	0.0519481	0.362	0.266	814.478
Gabpb2	0.00497049	0.0519142	0.089	0.034	73.1607
Retreg3	0.00538761	0.0519139	0.206	0.114	79.117
Plcg1	0.00790541	0.0518894	0.265	0.157	114.534
Zfp532	0.0205067	0.0518885	0.222	0.14	283.013
Fktn	0.0493049	0.0518708	0.416	0.297	630.61
Tox4	0.00871793	0.0518589	0.463	0.297	125.782
Ftsj3	0.00259321	0.0518303	0.132	0.057	38.8618
Snap47	0.27188	0.0518176	0.825	0.697	2110.6
Dock4	0.0135859	0.0517768	0.23	0.14	191.914
Rai1	0.0503771	0.0517748	0.428	0.314	642.409
Atxn2l	0.0486841	0.0517687	0.518	0.391	623.594
Gm20063	9.24563e-05	0.051759	0.086	0.017	1.44287
Zfp280b	0.00287344	0.0517472	0.237	0.131	42.981
Rnpepl1	0.00880183	0.0516473	0.249	0.149	126.922
Fat3	0.086649	0.0516243	0.233	0.171	1027.57
Entpd7	0.0229164	0.0516147	0.097	0.049	313.978
Zfp827	0.0248967	0.0516128	0.218	0.137	339.466
Papd5	0.00250965	0.0515281	0.374	0.226	37.6373
Tsc22d1	0.163257	0.0515279	0.903	0.746	1659.34
Nup88	0.0317777	0.0514817	0.284	0.186	426.043
Ptdss1	0.0136244	0.0514698	0.479	0.326	192.431
Tmem151a	0.10873	0.051462	0.405	0.32	1216.91
Rpl36a-ps1	0.1172	0.0514618	0.3	0.229	1288.62
Ctc1	0.0137433	0.0514174	0.202	0.12	194.028
Eef1akmt1	0.031184	0.0514165	0.195	0.123	418.863
Rnf219	0.00480631	0.0513685	0.16	0.08	70.8066
1810044D09Rik	0.00438474	0.0513358	0.066	0.02	64.8371
Snx12	0.048652	0.0513047	0.175	0.114	623.232
Mttp	0.019941	0.051303	0.58	0.411	275.725
Myl6b	0.00636769	0.0512675	0.078	0.029	93.0256
Hmgn1	0.0676432	0.0512521	0.957	0.84	833.297
Stxbp4	0.00297578	0.051231	0.183	0.094	44.4581
Mapk1ip1l	0.05684	0.0512074	0.451	0.326	714.82
Ebp	0.00373164	0.0511802	0.101	0.04	55.4336
Eps8	0.0228527	0.0511646	0.113	0.06	313.196
Gan	0.00441724	0.0510865	0.183	0.094	65.2868
Snx19	0.0811507	0.0510834	0.23	0.163	973.565
Cpox	0.0301383	0.0510711	0.409	0.277	406.174
Aacs	0.0107065	0.0510617	0.113	0.054	152.814
Prkd2	0.00105974	0.051046	0.058	0.011	16.1504
Lrfn2	0.0133332	0.0510127	0.14	0.074	188.572
Timm10	0.00600639	0.050974	0.385	0.24	87.9035
Spcs1	0.0206434	0.0509558	0.654	0.491	284.816
Apoa1	0.0270534	0.0509351	0.202	0.126	367.168
Casc4	0.138957	0.0509249	0.786	0.637	1466.42
Cstf1	0.00903804	0.0509182	0.136	0.069	130.021
Stk38l	0.00859101	0.0508902	0.128	0.063	124.02
Zfp575	0.0103821	0.05087	0.171	0.094	148.35
Plk3	0.0048466	0.0508545	0.089	0.034	71.3904
Nell2	0.030265	0.0507559	0.525	0.386	407.851
Hspe1	0.0668024	0.0507505	0.949	0.846	824.342
Cwc22	0.0323153	0.0506416	0.113	0.063	432.638
Gnai3	0.0105224	0.0506323	0.195	0.111	150.303
Cstf2t	0.0348017	0.0506313	0.459	0.326	462.932
Wdr74	0.00346819	0.0506229	0.101	0.04	51.6067
Id2	0.0652536	0.0505985	0.163	0.106	806.991
Rnf208	0.183101	0.0505965	0.782	0.631	1799.89
Camk2g	0.0682921	0.0505718	0.79	0.637	840.13
Rhot2	0.0247034	0.0505691	0.342	0.237	337.152
Ephx4	0.000357101	0.0505681	0.058	0.009	5.51507
Laptm4a	0.0204167	0.050553	0.661	0.48	281.873
Pgrmc2	0.0578396	0.0505456	0.673	0.52	726.177
Ebna1bp2	0.029398	0.0505452	0.342	0.234	396.844
Ephb2	0.0250194	0.0505317	0.195	0.12	341.09
Ddx21	0.0134616	0.0505288	0.16	0.089	190.279
Rnf215	0.00757627	0.0505116	0.198	0.111	109.97
Yars	0.0358411	0.0504865	0.3	0.211	475.611
Sptbn1	0.129542	0.0504716	0.953	0.829	1391.41
Mal2	0.0708149	0.0504704	0.514	0.403	867.34
Cnppd1	0.00499956	0.0504539	0.144	0.069	73.5786
1700003E16Rik	0.0227561	0.0504488	0.175	0.103	312.122
Gucy1a1	0.00245207	0.0504131	0.198	0.103	36.781
Rpl22	0.256354	0.0504131	0.934	0.857	2055.19
Vps29	0.0831658	0.0503416	0.56	0.431	993.582
Rhbdd3	0.00410158	0.0503366	0.109	0.046	60.7772
Reep3	0.00193403	0.0503223	0.125	0.051	29.1516
Rad51d	0.0489517	0.0503155	0.16	0.103	626.533
Nbr1	0.00690499	0.0503151	0.339	0.206	100.544
Yaf2	0.079055	0.0503019	0.498	0.374	951.981
Wdr89	0.236926	0.0502946	0.747	0.626	2107.93
Nkap	0.00951757	0.0502909	0.233	0.14	136.52
Ccdc167	0.021083	0.050289	0.156	0.089	290.587
Fam107b	0.000454532	0.0502683	0.07	0.014	7.00116
Acaa1a	0.00686911	0.0502625	0.261	0.154	100.042
Slc25a46	0.0753933	0.05025	0.529	0.386	916.254
Rab3d	0.00119828	0.050246	0.086	0.026	18.2162
Abhd10	0.0106563	0.0502324	0.249	0.149	152.14
Slc1a3	0.00365457	0.0502251	0.101	0.04	54.3216
Zfp652	0.0113974	0.0501266	0.23	0.137	162.116
Qrfpr	0.00211845	0.0501073	0.035	0.003	31.8699
6330403K07Rik	0.0540849	0.050103	1	1	685.202
Sf3b6	0.0050082	0.0500867	0.424	0.263	73.7007
Gps1	0.080235	0.0500507	0.37	0.277	964.024
Kdm2a	0.0616645	0.0500183	0.451	0.337	768.216
Zbtb1	0.00634366	0.0500095	0.078	0.029	92.6935
Gorasp2	0.0352126	0.0499988	0.432	0.317	467.975
Nsun3	0.0047942	0.0499888	0.171	0.089	70.6473
Tmub2	0.0392455	0.0499527	0.23	0.151	516.393
Polr3g	0.00141744	0.0499083	0.051	0.009	21.4855
Ankrd17	0.0287096	0.0498597	0.79	0.609	388.183
Map2k3	0.00405096	0.0498538	0.113	0.049	60.0515
Tapbpl	0.00342271	0.0498255	0.128	0.057	50.947
Lrrc3	0.00507251	0.049768	0.117	0.051	74.6065
Lsm11	0.0084395	0.0497549	0.179	0.097	121.9
Ick	0.0179268	0.0497351	0.136	0.074	249.918
Ccdc28a	0.0253946	0.0496961	0.28	0.186	345.849
Gatsl2	0.0287376	0.0496734	0.72	0.577	388.446
Lifr	0.0135226	0.0496445	0.101	0.049	191.088
Gabarapl2	0.114573	0.049615	0.848	0.709	1266.95
Crip1	0.00047679	0.0496118	0.07	0.014	7.34162
Stard3	0.038325	0.0495989	0.113	0.063	505.124
Adam10	0.0328199	0.0495848	0.451	0.314	438.802
Dpysl5	0.0566682	0.0495689	0.447	0.326	712.999
Pdzd4	0.0916335	0.0495523	0.37	0.28	1073.85
Ctsl	0.0587187	0.0495404	0.249	0.174	736.098
Sgsm2	0.052228	0.0495035	0.514	0.394	664.236
Ddhd2	0.0374651	0.0495004	0.584	0.423	494.839
Pianp	0.0896026	0.0494213	0.911	0.777	1053.37
Atg12	0.0416941	0.0494158	0.307	0.214	545.359
Mta1	0.0739531	0.049408	0.374	0.277	901.563
Cfl2	0.0672343	0.0493795	0.829	0.677	828.999
Uqcrq	0.24002	0.0493727	0.844	0.72	2128.74
Rbl2	0.00962272	0.0493687	0.21	0.12	137.942
Urgcp	0.0197839	0.049358	0.362	0.24	273.789
Acat1	0.0721152	0.0493551	0.42	0.314	881.753
Catspere2	0.00120518	0.0493515	0.105	0.037	18.3176
Setd1b	0.0458754	0.0492737	0.366	0.266	590.692
Gmds	0.0106884	0.049263	0.101	0.046	152.588
Polr1a	0.0236936	0.0492422	0.272	0.177	323.963
Klf10	0.00558817	0.0492266	0.093	0.037	81.9282
Pdss2	0.0188419	0.049218	0.16	0.091	261.96
BC051226	0.0173452	0.0491825	0.198	0.12	242.209
Rpl34	0.128267	0.0491811	1	0.994	1380.54
Abt1	0.00331647	0.0491742	0.16	0.077	49.4154
Tmem59l	0.143641	0.049172	0.661	0.531	1504.79
Gm26670	0.00818836	0.049158	0.086	0.034	118.436
Fitm2	0.0239243	0.0491475	0.218	0.137	326.997
Cnih1	0.0370335	0.0491161	0.564	0.426	489.88
Gm9866	0.0317537	0.049113	0.268	0.18	425.754
Trappc9	0.0242627	0.0491066	0.237	0.154	331.307
Pkp2	0.031255	0.0491046	0.082	0.04	419.755
Carhsp1	0.00193533	0.0490995	0.14	0.06	29.1693
Manba	0.0108816	0.0490502	0.109	0.051	155.161
Oxnad1	0.00487157	0.0490298	0.117	0.051	71.7387
Pcdhgc4	0.0604087	0.048975	0.21	0.146	754.505
Pla2g6	0.00554469	0.0489635	0.097	0.04	81.2962
Atp6ap1	0.0365735	0.0488684	0.782	0.591	484.38
Zfp710	0.00179552	0.0488662	0.078	0.023	27.1069
Nsd2	0.0386634	0.0487989	0.615	0.451	509.236
Rnf31	0.0116341	0.0487828	0.121	0.06	165.298
Mblac2	0.00853354	0.0487697	0.611	0.417	123.216
Larp4b	0.0802338	0.0486946	0.774	0.614	964.09
Rev1	0.114812	0.0486387	0.416	0.326	1268.56
Mical3	0.041078	0.048583	0.607	0.454	538.205
Baz2b	0.013057	0.0485739	0.335	0.214	184.808
Retreg1	0.112938	0.0485627	0.494	0.377	1253.38
Hsd17b12	0.0528667	0.0485386	0.35	0.257	671.301
Sesn1	0.00728781	0.0485334	0.288	0.177	105.921
Qdpr	0.0645847	0.0485055	0.416	0.309	799.429
Lcor	0.0141298	0.0484551	0.233	0.143	199.23
Apoo	0.0618245	0.048413	0.163	0.106	770.086
Ints6	0.0709882	0.04841	0.444	0.329	869.179
Pcp4l1	0.00912811	0.0484023	0.128	0.063	131.235
Opa1	0.0626589	0.0483685	0.49	0.366	779.101
Hddc3	0.0163624	0.0483511	0.125	0.066	229.074
Gm13075	0.000570313	0.0483324	0.086	0.023	8.77028
Impa1	0.0093771	0.0483064	0.389	0.249	134.618
Ddx5	0.0972985	0.0482327	0.973	0.931	1131.68
Slc30a7	0.0108664	0.0482016	0.16	0.086	154.966
Kctd13	0.0390512	0.0481999	0.393	0.291	514.031
AU019823	0.0380019	0.048193	0.237	0.157	501.36
Faf2	0.000543686	0.0481872	0.389	0.217	8.36461
Peli2	0.000862611	0.0481841	0.047	0.006	13.1842
Zfp426	0.00672721	0.0481827	0.21	0.12	98.0894
Cisd2	0.0211192	0.0481332	0.615	0.446	291.065
Gm42851	0.0468571	0.0481323	0.381	0.271	602.02
Gm21887	0.00362616	0.0481145	0.097	0.037	53.9138
Naa30	0.0361236	0.0481044	0.35	0.24	478.998
Efl1	0.0107939	0.048104	0.105	0.049	153.976
Nampt	0.0188046	0.0480822	0.315	0.209	261.459
Trnp1	0.000947135	0.0480802	0.272	0.143	14.459
Pitpnb	0.0558631	0.0480322	0.525	0.374	704.322
Usp32	0.207273	0.0480298	0.584	0.443	1961.63
Tmc4	0.00625158	0.0480164	0.237	0.137	91.3919
Setd7	0.0503169	0.0479986	0.377	0.274	641.742
Tppp3	0.0683672	0.0479845	0.471	0.346	840.78
2010315B03Rik	0.0370876	0.0479662	0.23	0.151	490.446
Nceh1	0.0860518	0.0479624	0.436	0.329	1023.41
Ypel1	0.00728298	0.0479589	0.202	0.111	105.865
Aagab	0.00734454	0.0479496	0.249	0.151	106.723
Sema3c	0.0182532	0.0479316	0.07	0.029	254.14
Ldhd	0.0105689	0.0479154	0.113	0.054	150.945
Tbc1d23	0.0102219	0.0478441	0.35	0.226	146.163
Fcor	0.00641258	0.0478364	0.156	0.08	93.6621
D430042O09Rik	0.0469335	0.0477891	0.331	0.237	602.955
Crbn	0.0107231	0.0477827	0.304	0.189	153.04
P4ha1	0.00545674	0.0477798	0.249	0.146	80.0721
Nipa1	0.00897379	0.047699	0.175	0.097	129.16
Tmem132a	0.0109987	0.0476911	0.245	0.149	156.764
Rec8	0.0564574	0.0476818	0.093	0.051	710.46
Bag3	0.0111468	0.0476446	0.074	0.029	158.776
Zfand6	0.0759067	0.0476231	0.249	0.174	920.368
Pabpc4	0.0256357	0.0476076	0.16	0.094	348.978
Akt2	0.00448414	0.0475992	0.132	0.06	66.2577
Tmem186	0.00903458	0.0475661	0.191	0.106	129.981
Pcnx4	0.0528086	0.0475656	0.296	0.211	670.67
4931406P16Rik	0.0533327	0.0475563	0.319	0.226	676.525
Upf2	0.110515	0.0475112	0.572	0.443	1233.01
Rab36	0.0251799	0.0474948	0.525	0.369	343.102
Hltf	0.0267943	0.0474849	0.198	0.126	363.894
Cetn3	0.0180912	0.047479	0.728	0.531	252.101
Ttc13	0.0272952	0.0474525	0.307	0.209	370.232
Lsm8	0.0258812	0.0474342	0.249	0.16	352.011
Nrf1	0.0315159	0.0474184	0.121	0.069	422.881
Kdm3a	0.0159104	0.0474051	0.163	0.091	223.16
Slc16a1	0.00214428	0.0473985	0.101	0.037	32.2478
Immp1l	0.0411454	0.0473755	0.35	0.237	539.046
Eif3j1	0.0380843	0.0473493	0.482	0.346	502.179
Slc43a2	0.043321	0.0473054	0.187	0.12	560.53
Lingo3	0.0669036	0.0472835	0.148	0.097	825.456
Ccnl1	0.2518	0.0472789	0.518	0.434	2033.03
Tbc1d20	0.00969377	0.0472738	0.311	0.197	138.931
Mrs2	0.00485464	0.04719	0.265	0.154	71.4991
Hacd3	0.110381	0.0471852	0.646	0.537	1231.74
Bhlhe41	0.00646934	0.0471544	0.494	0.346	94.4653
Tchp	0.0169609	0.047127	0.101	0.049	237.097
Nxf1	0.0446607	0.0470993	0.63	0.449	576.301
Rtel1	0.00655236	0.0470984	0.105	0.046	95.6448
Zdhhc22	0.00537307	0.047097	0.412	0.269	78.9089
Cldn12	0.0354799	0.0470946	0.179	0.111	471.209
Ampd2	0.089017	0.0470943	0.506	0.363	1047.46
Ptprj	0.0174786	0.0470456	0.292	0.191	244.001
Hs3st1	0.0323681	0.047033	0.101	0.054	433.311
Creld2	0.00423226	0.0470314	0.179	0.091	62.6375
Wdr60	0.0454865	0.0469654	0.183	0.117	586.094
Rapgef3	0.0211265	0.0469341	0.125	0.066	291.144
Kcnip3	0.00719784	0.0468664	0.101	0.043	104.693
Mrps11	0.0171791	0.0468409	0.257	0.16	239.957
Ryr3	0.0233899	0.0468372	0.195	0.12	320.138
Spg11	0.0294032	0.0468333	0.078	0.037	396.885
Spire2	0.0166606	0.0468087	0.117	0.06	233.065
C2cd2l	0.145377	0.0467764	0.401	0.306	1520.65
Nyap2	0.0192189	0.0467583	0.284	0.183	266.816
Ndufa2	0.120555	0.0467459	0.981	0.929	1315.02
Thbs3	0.0134583	0.0467007	0.175	0.1	190.246
Golim4	0.00060645	0.0466981	0.062	0.011	9.31508
Entpd6	0.104887	0.0466882	0.518	0.397	1181.66
Gnb2	0.282912	0.0466856	0.743	0.617	2164.85
2310035C23Rik	0.0307898	0.0466279	0.588	0.44	414.154
Lmtk2	0.106409	0.0466101	0.249	0.186	1195.51
Elac2	0.02314	0.0465959	0.125	0.069	316.903
Hnrnpl	0.0849993	0.0465859	0.603	0.477	1013.11
Snta1	0.00721765	0.0465667	0.113	0.051	104.966
Zfp398	0.0226261	0.0465466	0.319	0.209	310.452
Nop9	0.0258446	0.0465463	0.062	0.026	351.59
Fbxo30	0.00742113	0.0465449	0.117	0.054	107.799
Asns	0.00642902	0.046524	0.132	0.063	93.8959
Msrb2	0.00545033	0.0465118	0.175	0.091	79.9836
Ap4s1	0.0155946	0.0465078	0.362	0.234	218.949
Gdap1	0.207004	0.0464523	0.751	0.646	1959.71
Nrbf2	0.0699779	0.0464426	0.206	0.143	857.999
Col12a1	0.000201738	0.0464277	0.039	0	3.13158
Acsl1	0.0594287	0.0464033	0.327	0.231	743.69
Arhgef11	0.0203199	0.0463917	0.14	0.077	280.618
Tram1	0.0562213	0.0463721	0.401	0.283	708.108
Bicra	0.0183965	0.0463577	0.113	0.057	256.006
Ppp4r4	0.113527	0.0463307	0.191	0.137	1258.45
Mthfsl	0.0466372	0.0463117	0.237	0.163	599.568
Wdr3	0.0603254	0.0462954	0.144	0.091	753.645
Fbxl3	0.0697412	0.0462925	0.296	0.214	855.655
Fopnl	0.0921602	0.0462856	0.681	0.543	1079.1
Nt5dc3	0.0925238	0.0462737	0.346	0.263	1082.99
Cgref1	0.00713884	0.0462721	0.245	0.14	103.884
[truncated: 13,986 more rows]

## Sheet: VgatEsr1P35FvsOVX
	p_val	avg_logFC	pct.1	pct.2	p_val_adjust
Vgf	1.66467e-12	0.655005	0.381	0.163	2.72024e-08
Scg2	2.46099e-22	0.462954	0.995	0.98	4.02544e-18
Irs4	5.11465e-20	0.430423	0.941	0.823	8.36399e-16
Hpcal1	4.61591e-17	0.424834	0.77	0.486	7.54794e-13
Gabre	1.45139e-16	0.398101	0.646	0.337	2.37288e-12
Socs2	2.07858e-20	0.381184	0.261	0.02	3.39931e-16
Fgfr1	5.3452e-05	0.376781	0.57	0.423	0.865387
Pdzrn4	9.90789e-16	0.370846	0.561	0.271	1.61964e-11
Tpt1	1.68783e-22	0.365256	0.989	0.943	2.76095e-18
Kcns2	4.76247e-13	0.34395	0.369	0.143	7.7833e-09
Nts	0.000282793	0.342901	0.333	0.226	4.55099
Plp1	1.72571e-14	0.33551	0.721	0.429	2.82085e-10
Ptprn	1.25439e-08	0.327161	0.892	0.8	0.000204717
Ucp2	2.09406e-12	0.323809	0.331	0.111	3.42169e-08
Olfm3	9.20646e-09	0.31152	0.556	0.349	0.000150259
Pgr	4.14703e-10	0.30889	0.518	0.294	6.77127e-06
Sez6l	7.33977e-13	0.301843	0.901	0.694	1.19946e-08
Tmem35a	1.94191e-06	0.290833	0.405	0.263	0.0315949
Thy1	4.47332e-11	0.286116	0.883	0.711	7.30583e-07
Clstn3	1.34598e-08	0.285314	0.795	0.614	0.00021965
Hspa8	1.22143e-13	0.285122	0.993	0.96	1.99643e-09
Id4	6.01455e-07	0.280817	0.644	0.457	0.00979349
Itm2c	7.36849e-17	0.273217	0.998	0.986	1.20475e-12
Sccpdh	4.14751e-07	0.270073	0.518	0.329	0.00675506
Gm1673	6.86701e-09	0.261338	0.921	0.809	0.00011209
Sv2c	2.35086e-06	0.256162	0.369	0.209	0.0382391
Th	3.1178e-06	0.249297	0.146	0.046	0.0506955
Gal	1.52103e-05	0.248724	0.333	0.189	0.246756
Pcp4	3.44483e-06	0.248592	0.989	0.986	0.0560026
Ogfrl1	1.4714e-07	0.248547	0.662	0.44	0.00239883
Gm10076	8.52031e-08	0.246649	0.809	0.666	0.00138958
Ets2	5.97823e-06	0.233132	0.658	0.463	0.0971223
mt-Nd3	2.31226e-12	0.231875	0.98	0.946	3.778e-08
1110008P14Rik	1.56756e-06	0.231733	0.694	0.52	0.0255088
Tmod1	2.19772e-07	0.230321	0.315	0.154	0.00358118
Eef1b2	3.1402e-11	0.230265	0.966	0.883	5.12889e-07
Rpl22	2.16537e-08	0.227964	0.923	0.857	0.000353323
Cartpt	0.00129142	0.227958	0.137	0.069	20.5697
Enpp2	7.18442e-08	0.224627	0.264	0.106	0.00117185
Irs2	3.63041e-08	0.223392	0.439	0.237	0.000592266
Elmo1	5.44706e-05	0.222255	0.509	0.366	0.881769
Ssr4	6.87758e-06	0.214278	0.694	0.534	0.111713
Hs3st5	1.18582e-07	0.213798	0.315	0.146	0.00193359
Tubb5	1.47322e-06	0.212619	0.93	0.846	0.0239752
Maged1	5.52115e-08	0.212343	0.912	0.817	0.000900665
Rpl7a	8.69855e-11	0.210681	0.989	0.986	1.42047e-06
Pdyn	1.63938e-05	0.209915	0.239	0.117	0.26594
Prok2	0.000123039	0.209232	0.284	0.16	1.98622
Ctnna2	1.47053e-05	0.207515	0.595	0.429	0.238623
mt-Co2	1.37587e-26	0.202414	1	1	2.25079e-22
Saraf	1.98609e-07	0.202253	0.91	0.786	0.00323652
Ccnb1ip1	0.0200445	0.202199	0.448	0.363	299.805
Hspa4	1.7021e-05	0.20114	0.631	0.466	0.276098
Polr1d	2.97847e-07	0.198871	0.833	0.649	0.00485252
Scd2	6.60845e-06	0.19813	0.876	0.726	0.107354
Zbtb20	0.00011388	0.197635	0.901	0.84	1.83894
Ids	1.80196e-06	0.197196	0.86	0.711	0.0293197
Baiap2	1.26642e-05	0.195287	0.457	0.289	0.205565
AW551984	1.72393e-07	0.195215	0.892	0.743	0.00280966
Npm1	2.72585e-07	0.193521	0.993	0.966	0.0044415
Rab26os	3.39024e-06	0.192992	0.561	0.389	0.0551185
Tsc22d1	1.9564e-06	0.191748	0.881	0.746	0.0318287
Eef2	1.89741e-08	0.191575	0.966	0.906	0.00030962
Atp6ap2	3.91133e-05	0.190903	0.696	0.537	0.633792
2010107E04Rik	1.26775e-06	0.19007	0.849	0.669	0.0206326
Syp	6.44804e-07	0.19	0.941	0.877	0.0104974
Drp2	6.31743e-07	0.188975	0.279	0.129	0.0102854
Fam171b	0.000126357	0.187936	0.881	0.791	2.03914
Grik1	0.000149956	0.187657	0.3	0.183	2.4185
5330417C22Rik	3.33652e-09	0.185721	0.475	0.234	5.44654e-05
Aldoc	3.82571e-06	0.18524	0.417	0.246	0.0621755
Mt1	1.16553e-05	0.184366	0.642	0.474	0.189235
Ecel1	0.000853689	0.183542	0.482	0.363	13.6496
Rplp0	7.98369e-06	0.181806	0.964	0.911	0.129663
Dgkb	0.000161233	0.181032	0.773	0.623	2.59972
Iqsec3	3.4571e-05	0.180311	0.565	0.4	0.560257
Disp2	2.13268e-06	0.179573	0.91	0.8	0.0346945
Rpl39	5.61479e-12	0.179439	0.998	1	9.17288e-08
Bsg	2.76442e-05	0.178718	0.829	0.711	0.448167
Calcr	0.185549	0.177716	0.311	0.271	2091.32
Cbln4	0.000232652	0.176999	0.191	0.097	3.74686
Maf	1.26725e-06	0.176512	0.155	0.046	0.0206258
Itih3	2.17262e-09	0.170913	0.176	0.037	3.5468e-05
Eif1b	7.39898e-06	0.168941	0.93	0.886	0.120174
Rack1	2.79039e-05	0.168091	0.908	0.806	0.452323
Spock3	0.000923871	0.167824	0.554	0.437	14.7616
Rmnd5a	3.21029e-05	0.16762	0.385	0.237	0.520323
Rpl29	1.04635e-07	0.167537	0.998	0.989	0.00170639
Klf9	9.8269e-05	0.165011	0.392	0.243	1.58724
Ctnnb1	0.000229934	0.164745	0.788	0.634	3.70354
Nop56	0.000810724	0.164198	0.597	0.443	12.97
Rpl31	2.98308e-11	0.1639	0.998	1	4.87256e-07
Rplp2	3.74702e-10	0.163595	1	1	6.11851e-06
Apoc3	6.08446e-07	0.163539	0.279	0.12	0.00990672
Prickle2	2.18916e-05	0.163482	0.498	0.329	0.355039
Ggct	1.80167e-06	0.162594	0.261	0.12	0.0293167
Tubb3	0.000347167	0.162049	0.736	0.589	5.58245
Penk	0.00162378	0.161652	0.412	0.283	25.8002
mt-Nd2	4.58307e-12	0.161254	0.998	1	7.48782e-08
Pik3r3	1.19909e-05	0.161003	0.243	0.117	0.194672
Kl	6.39661e-05	0.160086	0.151	0.06	1.03516
Pfkm	8.77728e-05	0.158102	0.432	0.294	1.41841
Rpl18	3.35964e-06	0.157685	0.977	0.974	0.0546244
Cbx6	2.58308e-06	0.15765	0.892	0.731	0.0420111
Spon1	0.0025061	0.157332	0.164	0.091	39.6365
Ptp4a1	0.00163929	0.156171	0.698	0.574	26.045
mt-Atp6	1.38271e-20	0.155878	1	1	2.26142e-16
Gnptab	3.93836e-07	0.155651	0.324	0.151	0.0064148
Rap1gap	0.000282116	0.155469	0.635	0.477	4.54037
Map2k7	1.36654e-05	0.155028	0.52	0.32	0.221804
Ptpro	7.04287e-05	0.153239	0.727	0.549	1.13918
Rpl15	7.66384e-09	0.152925	0.998	0.994	0.000125089
Npr2	1.40982e-05	0.152412	0.243	0.12	0.228814
Mturn	7.22257e-05	0.151968	0.363	0.217	1.16811
Ube2e3	7.49104e-05	0.151858	0.426	0.269	1.21123
Stard7	0.000546005	0.151702	0.599	0.437	8.76229
Rps21	1.25594e-11	0.151322	1	0.997	2.0517e-07
Gnpda1	1.05045e-06	0.151223	0.324	0.16	0.0170982
Htr1b	0.00249664	0.150943	0.306	0.209	39.4943
Clta	0.000739382	0.150565	0.896	0.823	11.8427
Ywhah	9.6683e-05	0.150082	0.989	0.946	1.56191
Rps15a	2.06704e-09	0.149508	1	1	3.37464e-05
Pcdh7	0.000986261	0.149407	0.849	0.72	15.7457
Meg3	2.59218e-13	0.149158	1	1	4.23666e-09
B2m	0.00196891	0.148741	0.106	0.046	31.2308
Pid1	0.000352473	0.148176	0.376	0.243	5.6667
Cltc	8.61739e-05	0.147492	0.926	0.831	1.39274
Map1a	7.97028e-05	0.146848	0.755	0.58	1.28863
Rpl36a	3.17215e-08	0.146507	0.995	0.997	0.000517536
Htr2c	0.00862532	0.146153	0.331	0.24	133.02
Pak3	0.000122859	0.145669	0.959	0.903	1.98343
Tmcc3	0.000178655	0.145425	0.766	0.603	2.87991
Npy1r	0.000396035	0.145406	0.279	0.169	6.36309
Wdr6	0.000117479	0.144574	0.955	0.917	1.8967
Tmem158	0.000354953	0.144058	0.782	0.657	5.70587
Atp1a2	0.000134225	0.143847	0.255	0.137	2.16586
Abca2	0.000135667	0.143045	0.568	0.383	2.18899
Rps9	2.16818e-06	0.142967	1	0.994	0.0352697
Nr2f1	0.000123835	0.142075	0.162	0.071	1.99883
Slc6a11	0.0052954	0.141869	0.471	0.354	82.7354
Dad1	0.000635253	0.141602	0.505	0.357	10.1844
Otud6b	0.000114005	0.141063	0.48	0.311	1.84085
Lrp11	0.000125915	0.140233	0.446	0.291	2.03214
Rps12	1.70251e-07	0.139521	0.998	0.994	0.00277509
Mrpl9	0.000143792	0.139242	0.293	0.166	2.31937
Trp53inp1	4.31049e-07	0.138506	0.131	0.029	0.00701963
Cpe	0.000171302	0.136629	0.944	0.86	2.76173
Sv2a	0.000559316	0.136542	0.973	0.92	8.97423
Cisd3	5.24454e-05	0.136422	0.39	0.234	0.849143
Nrsn1	0.000272398	0.136318	0.982	0.963	4.38425
Tnks2	0.000923699	0.136249	0.543	0.389	14.7598
Dner	0.00448386	0.135924	0.687	0.574	70.3115
Abat	0.00143691	0.135819	0.818	0.726	22.8627
Gfra1	0.000360053	0.135673	0.374	0.243	5.78676
Rnf145	0.000378343	0.135606	0.45	0.303	6.07921
Odc1	0.0207726	0.135601	0.536	0.44	310.073
Hap1	3.75364e-06	0.135533	0.993	0.98	0.0610079
Epb41l4aos	1.25875e-05	0.1354	0.387	0.217	0.204333
Gm42067	3.73556e-06	0.134944	0.255	0.117	0.0607178
Mien1	0.00144554	0.134715	0.649	0.491	22.9971
Cst3	0.000820798	0.134109	0.784	0.683	13.1279
Reep5	2.67336e-05	0.133935	0.93	0.843	0.433432
Eno2	0.00236735	0.133568	0.896	0.809	37.4775
Cdkn1b	0.000554808	0.132982	0.187	0.097	8.90245
Eif3f	0.00269489	0.132922	0.939	0.891	42.5981
Rpl23	5.52634e-08	0.132587	1	1	0.000901456
Snrpg	0.00396682	0.132511	0.644	0.511	62.2989
Nrsn2	1.49546e-05	0.132473	0.975	0.923	0.242639
Gnas	0.00790806	0.132408	0.993	0.991	122.33
Gm16485	4.27471e-07	0.131061	0.151	0.04	0.0069618
Tmem50a	0.00105062	0.130808	0.655	0.509	16.7626
Gabrg1	0.00011653	0.130503	0.599	0.423	1.8815
Dgkz	0.0019572	0.130347	0.268	0.174	31.049
Gpx3	0.0189403	0.129926	0.671	0.569	284.104
Mageh1	8.85269e-05	0.129514	0.405	0.243	1.43051
Rpl36	1.90726e-07	0.129491	0.998	0.997	0.00310826
Nsg1	0.000426406	0.129321	0.93	0.886	6.84978
Chrnb2	0.000138568	0.129117	0.399	0.246	2.23565
Dscr3	5.01179e-05	0.129041	0.252	0.129	0.811609
Herc3	0.000618978	0.128486	0.818	0.66	9.92469
Fam107a	1.09445e-05	0.128462	0.162	0.06	0.177717
Ctsd	0.00482767	0.128289	0.606	0.477	75.6012
Nenf	0.000665594	0.128081	0.91	0.814	10.6668
Rps20	3.10697e-07	0.127811	0.998	1	0.00506157
Eef1a1	3.54189e-07	0.127787	1	1	0.00576938
5031439G07Rik	4.56309e-05	0.127454	0.41	0.251	0.739083
Lpp	1.14717e-05	0.12734	0.216	0.094	0.186265
Hk1	0.000647402	0.127014	0.581	0.429	10.3785
Calm3	0.000125131	0.125768	0.973	0.92	2.01962
Gabrq	0.0055731	0.125197	0.705	0.58	86.9403
Mkrn1	0.000500678	0.125086	0.484	0.329	8.03788
Ly6e	0.0156876	0.124559	0.649	0.554	237.322
Ppdpf	0.000293523	0.1243	0.64	0.46	4.72279
Nfasc	0.00344061	0.124015	0.597	0.446	54.1793
Nek7	0.000591463	0.123948	0.275	0.16	9.48766
Anp32b	0.00361763	0.123937	0.52	0.394	56.8909
Chodl	0.000157605	0.123886	0.356	0.211	2.54137
Mettl27	4.28078e-05	0.123716	0.144	0.054	0.693529
Rps6ka6	8.99487e-05	0.123404	0.23	0.114	1.45339
Mgat5	0.000786827	0.12245	0.462	0.326	12.5955
Pea15a	0.00122687	0.122415	0.923	0.84	19.5539
H3f3a	0.000236062	0.121819	0.745	0.569	3.80131
Hsd17b10	3.23674e-05	0.121345	0.313	0.166	0.524578
Rps13	2.79245e-07	0.121104	1	0.991	0.00454974
Cfl1	0.000224596	0.12027	0.966	0.897	3.61802
Tpi1	0.00547797	0.120241	0.804	0.68	85.5056
C1qtnf4	0.00467287	0.120138	0.604	0.497	73.2332
Arxes1	0.00102741	0.120005	0.372	0.249	16.3996
Stmn4	0.00316419	0.119918	0.52	0.386	49.9024
Dbn1	0.00106246	0.119854	0.554	0.409	16.9505
Actl6a	0.000531716	0.11972	0.302	0.177	8.53405
Angptl6	1.01199e-05	0.119135	0.185	0.074	0.164337
Sema3a	2.82138e-05	0.118894	0.149	0.054	0.457317
Sgcb	0.000957084	0.118827	0.34	0.217	15.2856
Tusc3	0.00572099	0.118793	0.64	0.497	89.2073
Ranbp6	0.00108714	0.11878	0.363	0.237	17.3399
Asb4	0.00501061	0.118708	0.363	0.254	78.3809
Grb10	0.00688401	0.118537	0.82	0.677	106.984
Snx10	0.000428542	0.118452	0.633	0.449	6.88368
BC029722	0.0021307	0.118077	0.851	0.731	33.7716
Slitrk5	0.0015075	0.116924	0.475	0.334	23.9737
Syn1	0.0115622	0.116907	0.741	0.611	176.81
Rxfp3	6.82127e-05	0.116755	0.101	0.029	1.10355
Mbd6	0.000133257	0.116337	0.23	0.12	2.15036
Gabra2	0.00801394	0.116335	0.689	0.597	123.92
Nfkbia	2.28074e-05	0.116186	0.198	0.086	0.369823
Snap47	0.00988896	0.116136	0.818	0.697	151.904
Slc25a12	0.00102917	0.11591	0.525	0.374	16.4256
Tmx2	0.00415348	0.115355	0.791	0.651	65.1848
Gpi1	0.00987707	0.114828	0.732	0.606	151.731
Wrnip1	7.33345e-05	0.114786	0.309	0.169	1.18597
Btf3	0.00760073	0.114636	0.896	0.849	117.705
Uba52	0.000350437	0.114265	0.61	0.437	5.63467
Ppm1l	0.000972532	0.114209	0.579	0.414	15.5284
Mical2	7.43976e-05	0.114039	0.214	0.103	1.20301
Rpl23a	1.2328e-07	0.113611	1	1	0.00201008
Gdpd1	0.000822257	0.113476	0.408	0.274	13.1495
Foxk2	0.000341129	0.113458	0.34	0.214	5.4857
Fam214b	0.000317834	0.113202	0.264	0.151	5.11237
Fam207a	0.00283712	0.113166	0.304	0.203	44.8067
Vdac2	0.00136526	0.112799	0.703	0.537	21.7335
Polr2g	0.000853226	0.112689	0.579	0.42	13.6431
Atp6ap1	0.00129864	0.112677	0.75	0.591	20.6835
Grcc10	0.00251721	0.11218	0.367	0.246	39.8072
Cd59a	0.000649367	0.112026	0.212	0.117	10.4094
Ormdl1	1.9796e-05	0.111978	0.189	0.08	0.321072
Dlg4	0.00491827	0.11193	0.867	0.789	76.9807
Rbbp7	0.0140094	0.111602	0.493	0.38	212.733
Ranbp9	0.00162248	0.111104	0.315	0.203	25.7811
mt-Nd4	5.99927e-07	0.111014	1	1	0.00976921
Plcg1	0.000441261	0.110814	0.27	0.157	7.08753
Chst11	4.92478e-05	0.110757	0.245	0.126	0.797567
Ube2h	0.0102246	0.110743	0.48	0.36	156.917
Fam57b	0.000106586	0.1107	0.331	0.186	1.72137
Ppa1	0.00159997	0.110637	0.367	0.254	25.43
Cacfd1	0.000665534	0.110577	0.437	0.283	10.6665
Ndufa6	0.00104296	0.110575	0.944	0.883	16.6415
Fam168b	0.00520867	0.110462	0.583	0.451	81.4219
Zfp157	0.00977453	0.110237	0.482	0.357	150.244
Gapdh	0.00178842	0.110194	0.77	0.617	28.3912
Nrp1	0.000475736	0.110143	0.207	0.111	7.63842
Slc25a4	0.00568844	0.110086	0.989	0.966	88.7226
Me1	0.000485051	0.109937	0.209	0.111	7.78749
Chmp7	0.000808191	0.109813	0.459	0.309	12.9302
Dirc2	0.00140766	0.10944	0.462	0.317	22.4015
Rnf112	0.00582492	0.108521	0.671	0.534	90.7871
Rpl5	0.00632076	0.108504	0.982	0.949	98.389
Cpeb1	2.78122e-05	0.108454	0.266	0.134	0.450864
Lbhd2	0.000887248	0.108395	0.198	0.109	14.1818
Rps28	4.32104e-05	0.108371	1	1	0.700009
Ube2r2	0.00106844	0.108139	0.752	0.6	17.0449
Plcb4	0.00534403	0.10803	0.597	0.469	83.4578
Ppia	0.000803753	0.108022	0.955	0.903	12.8633
Arhgap24	0.00025316	0.107962	0.273	0.149	4.07588
Inpp5f	0.00328887	0.107767	0.831	0.677	51.8293
Zrsr1	0.000309077	0.107553	0.493	0.343	4.97211
Sec61g	0.00607133	0.107535	0.872	0.774	94.5488
Rragc	0.0010926	0.107439	0.468	0.326	17.4259
Map1lc3b	0.0101402	0.107004	0.586	0.477	155.663
Trp53inp2	0.000351197	0.106983	0.304	0.18	5.64655
Csnk2b	0.00208998	0.106937	0.378	0.257	33.1303
Lgmn	0.00161735	0.10693	0.396	0.263	25.7013
Acvr2a	0.00124281	0.10671	0.268	0.163	19.8042
Prlr	0.00836577	0.106512	0.829	0.794	129.184
Tvp23a	0.000150227	0.106387	0.306	0.177	2.4227
Selenof	0.00361762	0.106175	0.615	0.466	56.8943
Fam102a	0.000443216	0.106117	0.255	0.146	7.1185
Pigq	0.000952194	0.106058	0.248	0.146	15.2094
Wwc1	4.10526e-05	0.105977	0.173	0.071	0.665175
Adgrl1	0.023373	0.105962	0.887	0.811	346.855
Pld3	0.0155103	0.105863	0.788	0.686	234.794
Mrpl12	0.00591004	0.105518	0.414	0.306	92.0902
Copz1	0.00863338	0.105349	0.462	0.34	133.135
Gde1	0.0423285	0.10512	0.507	0.42	603.393
Eef1a2	0.00247323	0.104982	0.649	0.486	39.1314
Cbarp	0.000588452	0.104952	0.977	0.96	9.43994
Samd14	0.00325836	0.104397	0.52	0.391	51.3616
Gabra3	0.0133405	0.104329	0.676	0.534	203.015
Ttc9b	0.00290114	0.103949	0.574	0.42	45.8062
Ubac2	0.000426032	0.103511	0.277	0.16	6.8442
Spock2	0.000756586	0.103507	0.919	0.809	12.1145
Fbxo3	0.0152075	0.103144	0.694	0.56	230.393
Chpt1	0.010077	0.103053	0.261	0.183	154.712
Kif22	0.00164007	0.103044	0.212	0.123	26.0559
Kdelr1	0.00132828	0.102678	0.381	0.251	21.1501
Kbtbd11	0.00327544	0.102495	0.419	0.294	51.6209
Pnma3	0.0206659	0.102427	0.518	0.429	308.604
Shisa4	0.00602694	0.102301	0.559	0.406	93.8756
Snx17	0.000737922	0.102151	0.369	0.231	11.82
Polr3k	0.00543332	0.102098	0.426	0.303	84.8304
Txndc16	0.0031033	0.101739	0.392	0.266	48.9483
Rassf5	0.00153797	0.10157	0.216	0.129	24.4553
Lman2	0.00120581	0.101524	0.41	0.271	19.2219
Enho	0.00566281	0.101431	0.453	0.323	88.3285
Slitrk6	6.04802e-05	0.101347	0.131	0.046	0.978872
D930016D06Rik	0.000596732	0.101227	0.268	0.157	9.57038
Gng4	0.013372	0.101207	0.543	0.44	203.481
Rraga	0.00243771	0.101197	0.586	0.423	38.5768
Prkacb	0.00769144	0.101038	0.986	0.986	119.064
Uqcrfs1	0.0108594	0.100846	0.687	0.54	166.365
Eif4b	0.00409491	0.100671	0.795	0.666	64.2777
Rps10	0.00140443	0.100641	0.995	0.991	22.3514
Txnrd1	0.00148659	0.100418	0.378	0.249	23.6458
Snhg6	0.00125676	0.100066	0.601	0.431	20.0239
Eif3i	0.0381157	0.100039	0.669	0.563	548.179
Rev3l	0.00130614	0.099722	0.462	0.309	20.8002
Trappc11	0.000142294	0.0995991	0.245	0.129	2.29535
Nanos1	0.00213118	0.0995717	0.309	0.2	33.7771
Gabbr1	0.0152369	0.0990482	0.935	0.906	230.825
Snn	0.00462775	0.0988334	0.527	0.389	72.5353
Eif3e	0.0550974	0.0986472	0.863	0.794	763.926
Rad23b	0.00107856	0.0984705	0.782	0.623	17.2042
Vamp1	0.00547372	0.0983517	0.257	0.166	85.4447
Prmt5	0.000410549	0.0981898	0.27	0.154	6.59589
Rpl34	4.19792e-05	0.0981228	1	0.994	0.680146
Cyp20a1	8.24502e-05	0.0978872	0.137	0.051	1.33264
Mbd5	0.00506	0.0978393	0.351	0.243	79.1182
Rnf40	0.00114818	0.0976609	0.162	0.083	18.3066
Ndufa1	0.00930054	0.0976348	0.581	0.443	143.154
Rpl10a	0.000468902	0.0976133	0.995	0.997	7.52915
Jmjd1c	0.020772	0.0973464	0.536	0.414	310.085
Hsp90ab1	0.00219246	0.0972428	0.998	0.997	34.7417
Cdkl2	0.000724979	0.0971961	0.565	0.409	11.6142
Ehmt2	0.000678937	0.0971357	0.41	0.263	10.8793
Jun	0.0251744	0.0969027	0.205	0.143	371.674
Ip6k1	0.00834585	0.0968129	0.741	0.617	128.885
Dr1	0.00226898	0.0966936	0.277	0.174	35.9315
Mast4	0.0379499	0.0966278	0.482	0.389	546.023
Znrf2	0.00335361	0.0962241	0.185	0.106	52.8227
Rps17	0.00126289	0.0962019	1	0.994	20.1178
Crocc	0.00353395	0.0961339	0.378	0.257	55.6067
Arxes2	0.0206688	0.0959727	0.745	0.629	308.626
Cstf2	0.00499921	0.0959594	0.48	0.343	78.2077
H2-D1	0.000903039	0.0956448	0.124	0.054	14.4324
Zfp667	0.00306514	0.0956286	0.32	0.217	48.3648
Slc25a27	0.000595579	0.0952982	0.279	0.166	9.55309
Tmem246	0.0124906	0.0951859	0.426	0.311	190.494
Pet100	0.00898016	0.0951851	0.387	0.283	138.339
Zfp251	0.0199114	0.0951752	0.293	0.209	297.973
Prnp	0.000776576	0.0951031	0.977	0.951	12.4322
Abhd17b	0.00148322	0.0950655	0.324	0.211	23.5936
Dnajc14	0.000568044	0.0949996	0.225	0.12	9.11312
Apoa1	0.00489435	0.0949892	0.207	0.126	76.6162
Rtn3	0.00283627	0.0949514	0.986	0.963	44.796
Txndc17	0.019967	0.0948385	0.658	0.534	298.746
Rps7	7.00821e-05	0.0948338	1	1	1.13365
Glul	0.00165455	0.0947633	0.365	0.24	26.2826
Marc2	0.00100061	0.0946826	0.198	0.106	15.9737
Mt3	0.0130716	0.0946822	0.908	0.854	199.081
Vwa5b2	0.0027137	0.0944721	0.347	0.243	42.8928
B4gat1	0.00246469	0.094331	0.39	0.263	38.9988
Trim32	0.00949382	0.0941614	0.608	0.469	146.053
Gng13	0.044032	0.0939228	0.405	0.334	625.695
Slc25a14	0.00920466	0.0938275	0.286	0.194	141.724
Ly6h	0.00392799	0.0937695	0.977	0.937	61.693
Alg2	0.00324927	0.0937278	0.854	0.749	51.2215
Celf6	0.00333073	0.093702	0.836	0.674	52.4789
Enah	0.0561737	0.0935989	0.822	0.723	777.668
Tmem43	0.00164317	0.0935676	0.255	0.154	26.1034
Ptpn23	9.78947e-05	0.0935124	0.198	0.091	1.58129
Baalc	0.00317022	0.0934034	0.349	0.237	49.9944
Rps26	0.00242448	0.0932095	1	0.989	38.3697
Rps18	0.000141057	0.0931637	0.998	1	2.27553
Kpnb1	0.0231259	0.0930702	0.565	0.443	343.327
Dip2b	0.00156854	0.092881	0.329	0.206	24.935
Ykt6	0.00222104	0.0928682	0.367	0.246	35.1835
Nr2f2	0.0486119	0.0927367	0.502	0.411	682.998
Ndufv3	0.0158048	0.0924979	0.727	0.603	238.984
R3hcc1l	6.43748e-05	0.0924495	0.14	0.051	1.04171
Slc1a3	0.00022995	0.0923313	0.113	0.04	3.70357
Rnf187	0.0157446	0.0921234	0.86	0.76	238.137
Smarca4	0.00466392	0.0920118	0.41	0.286	73.0976
Csnk1e	0.0228905	0.0914631	0.581	0.48	339.993
Psmb7	0.0065969	0.0914282	0.484	0.357	102.575
Usp48	0.00080733	0.0912627	0.349	0.214	12.9181
Crkl	0.0023329	0.0911553	0.345	0.223	36.9369
Pdcd4	0.0940526	0.0910978	0.745	0.649	1226.07
Psmd3	0.000815518	0.0910418	0.345	0.217	13.0458
Gpr158	0.00128031	0.0909659	0.336	0.211	20.3941
Mtfr1l	0.000748476	0.0908847	0.329	0.2	11.9853
Dact3	0.00175732	0.0906406	0.367	0.243	27.8992
Olfm2	0.010887	0.0904905	0.43	0.326	166.778
Icam5	0.000357116	0.0902584	0.115	0.043	5.73992
Chpf2	0.0107007	0.090119	0.257	0.174	164.009
Seh1l	0.00115393	0.0900803	0.291	0.177	18.397
Rpl7	0.00203999	0.0898856	0.998	0.989	32.3482
Galnt16	0.0251789	0.0897917	0.736	0.606	371.716
Reep2	0.0240927	0.08973	0.599	0.466	356.717
Lpin1	0.0161364	0.0897293	0.41	0.314	243.804
Pnmal1	0.066846	0.0897002	0.849	0.723	910.844
Csad	0.00415578	0.0894511	0.277	0.177	65.2125
Baiap3	0.0103215	0.0894392	0.881	0.797	158.353
Dnah1	0.00138068	0.0891723	0.209	0.12	21.9763
Tmem130	0.00370574	0.0891215	0.998	0.989	58.2616
Susd2	0.00475337	0.0891126	0.191	0.114	74.4662
Gdap1l1	7.09018e-05	0.0890084	0.36	0.214	1.14677
Rab3a	0.00749321	0.0888903	0.901	0.829	116.092
Rgs2	0.105517	0.0888539	0.572	0.509	1353.57
Atp5e	0.00522809	0.0887727	0.921	0.809	81.715
Tuba4a	0.00848948	0.0887587	0.64	0.506	131.027
Hacd3	0.0087894	0.0887152	0.662	0.537	135.462
Cntnap2	0.00925173	0.0886853	0.827	0.706	142.421
Megf8	0.00297278	0.0885251	0.516	0.371	46.9223
Ap3m1	0.00144403	0.0884604	0.259	0.154	22.9746
1810022K09Rik	0.00447736	0.0883735	0.466	0.34	70.2139
Ambra1	0.00348767	0.0883238	0.191	0.114	54.8995
Tsc2	0.000873612	0.0881967	0.214	0.117	13.9664
Scrn1	0.0155431	0.0880356	0.813	0.714	235.26
Cacul1	0.0169298	0.0878486	0.536	0.411	255.436
Crim1	0.107335	0.0876962	0.583	0.514	1372.93
Xrcc5	0.00150877	0.0876001	0.151	0.077	23.9925
Magi1	0.0702688	0.0876	0.545	0.457	953.337
Hspe1	0.00972203	0.0875883	0.93	0.846	149.447
Cox5a	0.00569156	0.087586	0.664	0.506	88.7599
Hint1	0.0158014	0.0875341	0.95	0.923	238.949
Mfn1	0.00499384	0.0874962	0.291	0.191	78.1287
Plekhb1	0.0125571	0.0873748	0.376	0.271	191.458
Hbb-bs	3.44173e-07	0.0873066	0.079	0.003	0.00560658
mt-Nd4l	0.0300077	0.0872608	0.809	0.737	437.692
Aplp1	0.0234693	0.0871504	0.899	0.871	348.144
Slc16a1	8.14462e-05	0.087073	0.115	0.037	1.31658
Peg3	0.000977044	0.0870667	1	0.994	15.5995
Sema3f	5.89465e-05	0.0870108	0.122	0.04	0.954108
Tspyl4	0.00530635	0.086977	0.939	0.889	82.9011
Slc22a17	0.00491178	0.086975	0.95	0.863	76.884
Tunar	0.000771253	0.0869728	0.252	0.149	12.3478
Prkce	0.061901	0.0869619	0.628	0.534	849.035
Hmgn2	0.0158072	0.08689	0.761	0.623	239.005
Jkamp	0.00889134	0.0868841	0.518	0.386	136.998
Gadd45gip1	0.00552644	0.0868503	0.446	0.329	86.2456
Lynx1	0.00716554	0.0868391	0.439	0.323	111.245
Psap	0.0197805	0.0867701	0.93	0.9	296.054
Uqcrc2	0.0173157	0.086767	0.455	0.343	261
Nabp2	0.00142163	0.0863172	0.435	0.289	22.6224
Ache	0.00284456	0.0861925	0.428	0.297	44.9213
Chml	0.000314824	0.0861808	0.133	0.054	5.06427
Ssh3	0.00272155	0.0860603	0.178	0.1	43.0142
Hrk	0.0440964	0.086006	0.203	0.143	626.521
Abca1	0.000265725	0.0859164	0.068	0.014	4.27737
Gnal	0.0108144	0.0858891	0.448	0.337	165.709
Fam8a1	0.0253031	0.0858467	0.7	0.577	373.398
Atp13a2	0.00184726	0.0856674	0.444	0.303	29.3161
Fam124a	6.7346e-05	0.0856573	0.149	0.057	1.08973
Tbca	0.00618851	0.0855472	0.932	0.857	96.3489
Serf2	0.00421367	0.085496	0.962	0.931	66.1124
Slitrk2	0.0652403	0.0853357	0.2	0.149	890.4
Mast3	0.00309192	0.0852194	0.414	0.283	48.7719
Mrpl52	0.00741954	0.0849732	0.86	0.729	115.025
Eid1	0.0175118	0.0848759	0.962	0.883	263.833
Nkiras1	0.00757632	0.0848332	0.354	0.249	117.334
Oaz2	0.0206962	0.0848312	0.892	0.806	309.016
Pak2	0.0182998	0.0848083	0.324	0.231	275.211
Glyr1	0.0137918	0.0848047	0.689	0.554	209.511
Gnai3	0.0034855	0.0845965	0.191	0.111	54.8688
Rps24	8.15311e-05	0.0845765	1	1	1.31787
Laptm4a	0.00484215	0.0845095	0.615	0.48	75.8233
Kbtbd2	0.00485496	0.0845048	0.349	0.237	76.019
Pam16	0.00416043	0.0845008	0.486	0.349	65.2813
mt-Cytb	2.203e-05	0.0844681	1	1	0.357239
B9d1	0.0140562	0.0844242	0.169	0.106	213.416
Cpsf2	0.00406321	0.0843941	0.288	0.189	63.7923
Slc1a1	0.000608228	0.0843371	0.345	0.211	9.75294
Sgsm1	0.00981975	0.0843334	0.712	0.594	150.93
Sult4a1	0.0414752	0.0842921	0.745	0.646	592.391
Szt2	0.000631251	0.0842625	0.131	0.057	10.1208
Timm10b	0.0112021	0.0841617	0.459	0.337	171.482
Ppp1r12c	0.00476896	0.0841536	0.345	0.229	74.7057
Aprt	0.0196099	0.084141	0.392	0.289	293.58
Nnat	0.105895	0.0840637	0.876	0.826	1356.94
Gpat4	0.00401187	0.0840288	0.358	0.24	62.9983
Ppp2r3d	0.00750842	0.0839283	0.207	0.129	116.32
Sod1	0.0243588	0.0838988	0.619	0.5	360.29
Fn3k	2.43321e-05	0.0838616	0.158	0.057	0.394521
Ubr4	0.00786478	0.0837862	0.446	0.323	121.676
Ypel2	0.00495059	0.0837773	0.291	0.189	77.4669
Tmem151a	0.00746438	0.0835206	0.441	0.32	115.668
Capns1	0.168374	0.0830511	0.633	0.554	1954.65
Chst2	0.00403172	0.0830482	0.194	0.114	63.306
Fasn	0.00986644	0.0829649	0.426	0.323	151.578
Atp1b3	0.0965993	0.082813	0.601	0.517	1254.24
Ikzf4	0.00079111	0.0827042	0.275	0.16	12.6633
Coa5	0.00279124	0.0826852	0.428	0.289	44.1016
Fbxw4	0.0247175	0.0825876	0.158	0.103	365.3
Reep1	0.0108275	0.0825439	0.7	0.569	165.899
Rrp1	0.0202453	0.0825352	0.7	0.58	302.668
Ulk4	0.00782814	0.0824746	0.185	0.111	121.148
Zfp92	0.0197482	0.0823615	0.363	0.263	295.592
Sept4	0.00727846	0.0823166	0.191	0.117	112.947
Ap2s1	0.0161443	0.0822051	0.538	0.4	243.909
Chn1	0.032394	0.0821721	0.631	0.531	470.297
Slc5a5	0.0217287	0.0820808	0.417	0.314	323.409
Unc45a	0.00219658	0.0819785	0.182	0.1	34.8048
Uqcrh	0.00349563	0.0819497	0.998	0.971	55.0177
Pten	0.0118362	0.0819452	0.606	0.471	180.797
Rpl37a	0.000198259	0.0819009	1	1	3.19455
Gm19412	0.0128456	0.0818623	0.291	0.2	195.729
Twf1	0.00432012	0.0818517	0.342	0.223	67.7568
Rpl28	0.0180806	0.0817341	0.989	0.957	272.041
Rimbp2	0.0142935	0.0816366	0.3	0.209	216.861
Usp51	0.0116283	0.0816273	0.266	0.177	177.761
March2	0.0200254	0.0815361	0.536	0.414	299.54
App	0.00627495	0.0815319	0.966	0.946	97.6821
Man2c1	0.000596679	0.0814636	0.198	0.103	9.57013
Clasp2	0.0266683	0.0814469	0.545	0.44	392.504
Lonrf2	0.0262161	0.0814422	0.955	0.897	386.137
Lhfpl3	0.0037633	0.0813944	0.243	0.149	59.1478
Gpr173	0.00146485	0.08135	0.167	0.086	23.3029
Vstm2b	0.0318713	0.0811993	0.322	0.243	462.994
Prrt1	0.0144017	0.0811827	0.536	0.406	218.473
Tmbim6	0.0787715	0.0811433	0.734	0.62	1050.97
C1qbp	0.00658636	0.0811334	0.421	0.294	102.418
Prdx6	0.00538542	0.0811308	0.405	0.283	84.0879
Arl4a	0.0166211	0.0810816	0.439	0.329	250.912
Pdik1l	0.00610266	0.0810727	0.261	0.166	95.0306
Ppip5k1	0.0105262	0.0809682	0.376	0.266	161.451
Psmf1	0.00248203	0.0809402	0.191	0.109	39.2682
Commd6	0.000820672	0.0806583	0.358	0.226	13.1266
Fam189a2	0.000450629	0.0806074	0.095	0.031	7.23709
Prkcsh	0.00938122	0.0804937	0.372	0.254	144.358
Atp1b1	0.0169715	0.0804187	0.991	0.974	256.05
Rtraf	0.0159149	0.0802134	0.872	0.814	240.553
Agtrap	0.00082222	0.0801292	0.137	0.063	13.1498
Hyou1	0.012604	0.0801114	0.182	0.117	192.135
Stk32c	0.0125533	0.080097	0.356	0.251	191.412
Mbtps1	0.0059558	0.0799532	0.322	0.217	92.7913
Pkm	0.0319458	0.0799384	0.903	0.846	464.012
Cntn2	0.0027283	0.0799075	0.392	0.271	43.1181
Tmem59l	0.0673481	0.0798974	0.631	0.531	916.877
Fsd1	0.00554382	0.0795921	0.277	0.18	86.5002
Nrf1	0.00014088	0.079487	0.16	0.069	2.27281
Fxyd2	0.0625216	0.0794613	0.351	0.277	857.046
Scml4	0.00728833	0.0794106	0.182	0.109	113.093
Fbxo10	0.0314546	0.0793133	0.556	0.443	457.475
Pcid2	6.74363e-05	0.0792982	0.11	0.034	1.09112
Dpf2	0.00331245	0.0792973	0.338	0.226	52.1942
Relt	0.00847255	0.0791971	0.173	0.106	130.791
Cbx3	0.273277	0.0791623	0.806	0.743	2553.23
Lamp5	0.0687143	0.0791504	0.133	0.091	933.965
Calcoco1	0.00397087	0.0791408	0.259	0.163	62.3585
Aff4	0.0216489	0.079097	0.854	0.774	322.287
Clmp	0.00249336	0.0790861	0.374	0.243	39.445
Aes	0.0501056	0.0790158	0.849	0.769	702.179
Dgkk	0.2632	0.0789416	0.419	0.369	2493.3
H13	0.028811	0.0788487	0.505	0.377	422.081
Col25a1	0.0699655	0.0788173	0.146	0.103	949.572
Blmh	0.00867714	0.0787559	0.502	0.36	133.793
Stt3b	0.0041266	0.078646	0.266	0.166	64.767
Atp8a2	0.00501314	0.0785989	0.403	0.28	78.4105
Cacna1d	0.00283403	0.0785855	0.18	0.1	44.7635
Elovl5	0.00156753	0.0785197	0.185	0.1	24.9205
Chchd1	0.0560544	0.0785178	0.462	0.363	776.242
Rpl35	0.00548022	0.078508	1	0.986	85.5352
Snrpb	0.0177783	0.0784557	0.261	0.183	267.688
Slitrk1	0.0200657	0.0784481	0.505	0.386	300.102
Ak5	0.0059659	0.0784045	0.18	0.106	92.9367
Nos1ap	0.0107387	0.0783649	0.455	0.334	164.561
Tcf25	0.00499202	0.0783316	0.932	0.88	78.1051
Lpcat1	0.0084286	0.078217	0.358	0.246	130.138
Rbfa	0.00533024	0.0782121	0.207	0.126	83.2476
Yipf3	0.0232134	0.078093	0.18	0.117	344.557
Sox4	0.0308498	0.0780834	0.446	0.349	449.205
P3h4	0.00135087	0.0780233	0.216	0.12	21.5072
Nptn	0.0382137	0.0779423	0.779	0.686	549.474
Tfe3	0.00113115	0.0779212	0.25	0.143	18.0362
Armcx1	0.00709891	0.0779195	0.484	0.357	110.26
Cd81	0.0294815	0.0779173	0.752	0.629	430.637
Ywhag	0.00235645	0.0778522	0.989	0.974	37.3073
Higd2a	0.0338261	0.0777475	0.646	0.534	490.072
Acaca	0.00379422	0.077585	0.448	0.311	59.6224
Papd7	0.00605146	0.0775026	0.302	0.203	94.2515
Slc6a6	0.00310689	0.0774723	0.563	0.411	49.0019
Tesc	0.00198607	0.0774126	0.178	0.094	31.497
Rps4x	0.00318073	0.0774121	1	1	50.1569
Creld1	0.0139182	0.077402	0.385	0.274	211.376
Faim2	0.030199	0.07737	0.935	0.877	440.361
Atp5g2	0.0235515	0.0773696	0.833	0.746	349.269
Gga3	0.00391662	0.0773619	0.286	0.18	61.5183
Aldh2	0.00160727	0.0773107	0.216	0.123	25.5443
Fem1b	0.0257486	0.0771146	0.664	0.571	379.509
Slc25a1	0.00467702	0.0770431	0.36	0.243	73.2935
Pcyox1l	0.00173436	0.0770344	0.185	0.1	27.5364
Cyb561	0.00359814	0.0769448	0.473	0.329	56.5951
Resp18	0.0262638	0.0769128	0.811	0.703	386.813
Ncor2	0.0187919	0.0769103	0.441	0.331	281.991
Npc2	0.00335077	0.076793	0.324	0.211	52.7813
Rab12	0.0318159	0.0767134	0.543	0.431	462.413
Polr2l	0.0256752	0.0766789	0.439	0.329	378.453
Dcaf5	0.015338	0.0766787	0.437	0.329	232.294
Rnft2	0.0105457	0.0766522	0.279	0.186	161.729
1110017D15Rik	0.00642024	0.0765186	0.171	0.1	99.8797
Cnih1	0.0129087	0.076511	0.55	0.426	196.664
Tm7sf3	0.00281515	0.0764795	0.182	0.103	44.4709
Mpv17	0.0157108	0.0764093	0.354	0.251	237.641
Pomgnt2	0.00726974	0.0763899	0.315	0.214	112.819
Atxn2l	0.00949601	0.076352	0.52	0.391	146.077
Carmil3	0.00334148	0.0763431	0.394	0.271	52.6417
Fgd1	0.00223474	0.0760788	0.126	0.06	35.3983
Ivd	0.00723944	0.0760231	0.257	0.166	112.363
Cdipt	0.0708816	0.0759684	0.48	0.391	960.729
Med13l	0.0036508	0.0756686	0.435	0.294	57.4089
Snrpf	0.055417	0.0756559	0.813	0.723	768.025
D8Ertd738e	0.0982836	0.0756359	0.831	0.729	1273.56
Klhl13	0.0165939	0.0756186	0.306	0.217	250.518
Brd1	0.000933503	0.0756156	0.248	0.14	14.9136
Lamp1	0.0313887	0.0755567	0.601	0.491	456.58
Pla2g15	0.00353154	0.0755116	0.126	0.063	55.5723
Kcnj3	0.042299	0.0755003	0.315	0.237	603.014
Tspan6	0.00673177	0.0754669	0.396	0.274	104.632
Lrrfip2	0.0169872	0.0754639	0.284	0.2	256.269
Pld5	0.00324824	0.0754512	0.119	0.057	51.2085
Rab15	0.0409667	0.0753455	0.516	0.417	585.496
Prelid1	0.0692302	0.0752179	0.509	0.414	940.492
Syngr3	0.0201008	0.0752085	0.766	0.697	300.588
Plekhg5	0.00327034	0.0751216	0.212	0.126	51.5438
Asic1	0.00554388	0.074931	0.358	0.251	86.4957
Rusc1	0.0199442	0.0748328	0.336	0.246	298.446
Cda	0.0048564	0.0747966	0.108	0.051	76.0367
Got1	0.0122246	0.0746766	0.624	0.466	186.559
Cul4a	0.0613673	0.0746558	0.327	0.251	842.511
Tmem256	0.00982222	0.074608	0.649	0.5	150.958
Rpl11	0.00732532	0.0746036	1	1	113.63
Mal2	0.0125854	0.0745812	0.52	0.403	191.877
Plec	0.00351288	0.0745581	0.275	0.171	55.2821
Pla2g6	0.000326521	0.0745275	0.11	0.04	5.25112
Ccpg1	0.0216113	0.0744428	0.3	0.217	321.77
Pnrc2	0.00361537	0.0743999	0.354	0.234	56.8625
Uqcc3	0.0200012	0.074347	0.41	0.3	299.199
Gatsl2	0.0109847	0.074309	0.709	0.577	168.242
Srxn1	0.00878777	0.0741973	0.329	0.226	135.446
Cbx4	0.00553263	0.0741715	0.236	0.149	86.3311
Bid	0.000111477	0.0741059	0.151	0.06	1.80025
Plxna3	0.0140111	0.074083	0.191	0.123	212.745
Mad2l2	0.00547087	0.0740531	0.16	0.089	85.4057
Ifnar1	0.00545193	0.0740257	0.221	0.134	85.1155
Wdr26	0.0107159	0.074002	0.507	0.386	164.232
Aatk	0.0398761	0.073935	0.671	0.574	571.266
Tgfbrap1	6.97916e-05	0.0739208	0.214	0.1	1.12902
Tmco1	0.0396862	0.0737836	0.372	0.294	568.822
Smpd1	0.00874724	0.0736399	0.313	0.211	134.848
Dld	0.00322331	0.0735603	0.378	0.254	50.822
Enox2	0.00148711	0.0735258	0.169	0.086	23.6524
Rsph10b	0.000655093	0.0735187	0.083	0.026	10.4998
Gt(ROSA)26Sor	0.0733409	0.0735171	0.266	0.203	989.808
Bag3	0.00137029	0.0734354	0.083	0.029	21.8123
Miat	0.0441514	0.0733533	0.57	0.466	627.259
Actg1	0.0214405	0.0732962	0.973	0.94	319.378
Cx3cl1	0.0568862	0.0732689	0.755	0.663	786.565
Idnk	0.00984423	0.0732607	0.309	0.211	151.257
Sf3a1	0.0306918	0.073253	0.327	0.237	447.179
Fgfr3	0.000959883	0.0732076	0.113	0.046	15.3293
Nat10	0.0209486	0.0731439	0.164	0.103	312.616
Rps6ka3	0.000947006	0.0731394	0.09	0.031	15.1275
Adipor2	0.00209504	0.0731335	0.239	0.137	33.2085
Mlx	0.00403902	0.072991	0.185	0.106	63.4167
Mvd	0.000146468	0.0729849	0.092	0.026	2.36238
Pard6a	0.0129688	0.0729292	0.225	0.149	197.567
Atp13a1	0.000714333	0.0729018	0.191	0.097	11.445
Napb	0.484988	0.0728354	0.962	0.951	2753.28
Mtmr1	0.0020878	0.0727795	0.194	0.109	33.0999
Rnf149	0.0230604	0.0727456	0.417	0.314	342.401
Tmem181a	0.0613478	0.0726433	0.342	0.26	842.305
Zmym1	0.0715531	0.072606	0.507	0.411	968.399
Cdh22	0.00349155	0.0725245	0.171	0.094	54.9569
Ddx39b	0.076118	0.0724552	0.502	0.417	1019.3
Spata13	0.00131455	0.0722606	0.101	0.04	20.9329
Kcnk2	0.0724557	0.0722203	0.568	0.449	978.949
Mfap3	0.0291555	0.072199	0.225	0.154	426.632
Txn2	0.0811217	0.072176	0.471	0.38	1079.57
Slc38a10	0.0136654	0.0721409	0.232	0.154	207.687
Nicn1	0.0189011	0.0720895	0.689	0.531	283.555
Bap1	0.00455292	0.0720656	0.313	0.206	71.3806
Mfng	0.00801346	0.0720362	0.164	0.094	123.92
Hdac6	0.00246043	0.0719783	0.205	0.117	38.9339
Scap	0.0302292	0.0719611	0.214	0.149	440.741
Actn1	0.0105693	0.0719447	0.284	0.189	162.07
Faap100	0.00373472	0.0718883	0.198	0.114	58.7023
Arfgap1	0.0270008	0.0718485	0.372	0.271	397.182
Tpd52	0.0213013	0.0718349	0.455	0.346	317.496
Fxr1	0.0190046	0.0718087	0.509	0.389	284.993
Rpl27a	0.00226077	0.071708	1	1	35.8061
Tac1	0.180535	0.0716427	0.02	0.009	2049.07
Phlda1	0.017287	0.0716268	0.182	0.114	260.602
Nap1l5	0.000823138	0.07162	0.995	1	13.1628
Lrp10	0.000370789	0.0716081	0.11	0.04	5.95822
Egfl7	0.00823105	0.0715166	0.32	0.217	127.153
Zfp277	0.00191696	0.0713972	0.124	0.057	30.4126
Stx12	0.0436526	0.0713798	0.678	0.546	620.653
Zfp593	0.000512916	0.0713411	0.104	0.037	8.23282
Zfp560	0.0242514	0.0713086	0.412	0.297	358.799
Rgs11	0.00124073	0.0713038	0.205	0.114	19.7723
Diras1	0.0819246	0.0712674	0.318	0.254	1089.27
Ptms	0.059643	0.0712616	0.892	0.834	821.045
Zfp467	0.00427736	0.0711042	0.342	0.226	67.0989
Actr1b	0.149374	0.0710409	0.595	0.52	1774.71
Cyb5r3	0.00931335	0.0710248	0.486	0.357	143.332
Syne2	0.0159766	0.0710114	0.178	0.109	241.454
Ndufs2	0.0499735	0.070989	0.678	0.557	700.428
Uba3	0.0210367	0.0709538	0.401	0.297	313.805
Gfra4	0.0190766	0.0709334	0.403	0.3	285.977
D430019H16Rik	0.0701311	0.0707502	0.619	0.543	951.538
Gm47033	0.111366	0.0707495	0.173	0.131	1417.03
Sesn1	0.010652	0.0707256	0.259	0.177	163.295
Zfp532	0.00970573	0.0706869	0.216	0.14	149.206
Mrpl30	0.0236452	0.0706528	0.725	0.609	350.517
Dcaf7	0.0456274	0.070546	0.822	0.711	646.266
Polr3e	0.00263272	0.0705348	0.153	0.08	41.6207
Gda	0.165192	0.0704916	0.687	0.634	1927.14
Tubb2b	0.0249124	0.0704087	0.372	0.274	368.005
Smap1	0.00693042	0.0704003	0.468	0.337	107.699
Apc	0.0308965	0.0703824	0.608	0.486	449.823
Mif	0.0524543	0.07038	0.77	0.651	730.216
Maz	0.0434866	0.0703235	0.405	0.311	618.423
9530068E07Rik	0.0195197	0.0703077	0.556	0.423	292.308
Rcl1	0.00496795	0.0701847	0.128	0.066	77.7334
Atp1b2	0.0294585	0.0701495	0.718	0.606	430.33
Fjx1	0.0007442	0.0701401	0.088	0.029	11.9191
Nek9	0.00575949	0.070099	0.164	0.094	89.7963
Pim3	0.00958012	0.0699959	0.2	0.126	147.323
Nudt10	0.0858964	0.0699244	0.444	0.363	1134.61
Uhrf1bp1l	0.0442053	0.0699134	0.383	0.3	627.98
Cep19	0.0121309	0.0698496	0.475	0.34	185.165
Gosr2	0.00531109	0.0697383	0.387	0.263	82.9592
Rgma	0.0223764	0.0697298	0.104	0.057	332.648
Rap1gds1	0.0136007	0.0697232	0.577	0.434	206.785
Tmem186	0.00657682	0.0697193	0.178	0.106	102.276
Rps25	0.00185379	0.069695	1	1	29.416
Akap17b	0.0141303	0.0696324	0.311	0.214	214.513
Wbp1	0.00754635	0.0695923	0.275	0.18	116.893
Pigs	0.0277154	0.0695593	0.295	0.211	407.167
Abca3	0.0272581	0.0694757	0.363	0.277	400.83
Stk3	0.00956332	0.0694349	0.189	0.117	147.093
Fstl5	0.15874	0.0694194	0.696	0.637	1863.61
Imp3	0.0255005	0.0693591	0.432	0.323	376.107
N4bp2	0.0297705	0.0693522	0.421	0.32	434.411
Nprl2	0.00734545	0.0693375	0.178	0.106	113.921
Rpl41	6.20606e-05	0.0693358	1	1	1.00439
Taf10	0.0263545	0.0692666	0.331	0.24	388.096
Ufsp1	0.0291127	0.0692384	0.153	0.1	426.123
Zfp280b	0.00291515	0.0692319	0.221	0.131	46.0215
Flywch2	0.0207677	0.0692263	0.261	0.183	310.041
Nhsl2	0.0173053	0.0692219	0.322	0.237	260.86
Tubgcp3	0.0134601	0.0691952	0.248	0.169	204.728
Fkbp5	0.00730724	0.0691464	0.187	0.111	113.379
Gm30025	0.00103575	0.0689836	0.158	0.077	16.5275
Ppp1r14b	0.017259	0.0688977	0.176	0.111	260.197
Ret	0.00618952	0.0687535	0.09	0.04	96.3585
Fam214a	0.0167949	0.0686773	0.268	0.183	253.486
Hsbp1	0.0434448	0.0686537	0.858	0.757	617.873
Ergic3	0.0592067	0.0685296	0.664	0.554	815.454
Tmem29	0.0201342	0.0685019	0.59	0.463	301.067
Slc25a3	0.0227552	0.068462	0.863	0.751	338.073
Acox1	0.0162909	0.0684616	0.57	0.437	246.008
Syngr1	0.0685436	0.0683839	0.845	0.769	932.124
Usp22	0.0427505	0.0683416	0.926	0.814	608.852
Hcfc1r1	0.17594	0.068252	0.597	0.526	2016.63
Cops2	0.100115	0.0682397	0.682	0.554	1293.49
Bax	0.0361199	0.0681465	0.441	0.346	521.427
Ulk1	0.0215517	0.0680683	0.322	0.24	320.97
Gas7	0.202013	0.0680658	0.626	0.566	2230.43
Opa1	0.0445962	0.0680473	0.468	0.366	633.267
Micu3	0.073668	0.0679515	0.811	0.72	993.487
Gm13075	0.000922042	0.067826	0.077	0.023	14.7342
H2afv	0.11035	0.0677643	0.412	0.329	1406.63
Ergic2	0.0131033	0.0677478	0.401	0.289	199.537
Zmat4	0.139398	0.0677107	0.437	0.366	1676.27
Rnf31	0.00430837	0.0675175	0.122	0.06	67.5768
Fam199x	0.0131459	0.0674832	0.306	0.209	200.16
Prkci	0.0071336	0.067475	0.282	0.183	110.771
Dhdh	0.0109067	0.0674701	0.133	0.074	167.069
Ankrd46	0.0369666	0.0674341	0.561	0.443	532.8
Pdxp	0.0377649	0.0673647	0.84	0.726	543.626
Pgrmc1	0.0412415	0.0673558	0.959	0.923	589.176
Plekhm1	0.00341523	0.067243	0.099	0.043	53.7865
Opn3	0.000225936	0.0672277	0.074	0.017	3.63937
Nhlrc1	0.0121451	0.0672099	0.2	0.129	185.371
Acsl4	0.058996	0.0672076	0.349	0.266	812.906
Necab2	0.00639215	0.0670929	0.133	0.071	99.4555
Ngb	0.076162	0.067032	0.608	0.517	1019.81
Ppfia4	0.0281944	0.0670139	0.394	0.3	413.724
Tor1aip1	0.0347884	0.0669719	0.18	0.123	503.458
Brox	0.0161612	0.0669675	0.36	0.257	244.131
Psmd14	0.00798235	0.0668844	0.372	0.257	123.447
Retreg3	0.000954859	0.0668577	0.212	0.114	15.251
Rab3b	0.0303831	0.0668247	0.322	0.237	442.833
Lmtk3	0.0382709	0.0668138	0.444	0.346	550.22
mt-Co1	0.000103517	0.0667926	1	1	1.6719
March11	0.00345554	0.0667579	0.173	0.097	54.404
B3galnt1	0.0413295	0.0667446	0.464	0.351	590.391
Cers5	0.0292322	0.0666581	0.264	0.191	427.141
Cntnap1	0.0197183	0.0666288	0.275	0.197	295.183
Tmem255a	0.0429476	0.0666016	0.901	0.82	611.445
Lpcat4	0.0015581	0.0665033	0.151	0.074	24.7722
Tnxb	0.000370156	0.0663959	0.043	0.003	5.94841
Abr	0.0696589	0.0663196	0.813	0.731	945.69
Mdm4	0.0506262	0.0662875	0.408	0.309	708.918
Pdzd4	0.041548	0.0662746	0.369	0.28	593.264
Dagla	0.00102831	0.0662713	0.142	0.066	16.4129
Chmp2b	0.0128571	0.0662047	0.394	0.271	195.89
Mrpl45	0.0120622	0.0661782	0.288	0.194	184.178
Gaa	0.0430487	0.066165	0.975	0.929	612.712
Snx30	0.0616119	0.066155	0.408	0.329	845.562
Usp12	0.100217	0.0661366	0.275	0.22	1294.71
Tmem143	0.0171682	0.0660979	0.124	0.071	258.88
Fktn	0.0499262	0.0660196	0.39	0.297	699.866
Uros	0.00916503	0.0660075	0.178	0.109	141.123
Pam	0.274915	0.065999	0.592	0.523	2561.66
Ttyh1	0.00478224	0.0659473	0.304	0.2	74.909
Csrnp2	0.00479576	0.0659332	0.128	0.066	75.116
Fam210a	0.0183028	0.0658267	0.221	0.146	275.238
Cds1	0.0030771	0.0658228	0.144	0.074	48.5505
Pls3	0.0438252	0.0657874	0.381	0.297	622.843
Lrrc4b	0.0625307	0.0657662	0.635	0.537	857.109
Pdha1	0.0413677	0.0657193	0.547	0.437	590.897
Tspyl1	0.11569	0.0657178	0.827	0.717	1449.25
Gatad2a	0.00181939	0.0656383	0.221	0.126	28.8755
Greb1	0.00180747	0.0656029	0.041	0.006	28.6882
Mex3a	0.00961188	0.0655848	0.158	0.091	147.792
Invs	0.0318846	0.0655807	0.182	0.123	463.156
Nbr1	0.00852914	0.0655473	0.313	0.206	131.596
6330403K07Rik	0.00385783	0.065505	0.998	1	60.5987
Ece1	0.023811	0.0654932	0.385	0.277	352.855
Pigb	0.00217517	0.0654791	0.119	0.054	34.4699
Hdac2	0.0549109	0.0654335	0.455	0.354	761.669
Rps2	0.0150334	0.0653808	0.998	0.994	227.846
Arhgef11	0.0110227	0.0652368	0.137	0.077	168.802
As3mt	0.00790168	0.0652093	0.236	0.151	122.239
Vdac1	0.0247228	0.0651136	0.764	0.634	365.353
Ndufc2	0.152427	0.0650851	0.682	0.577	1803.37
Mllt11	0.0558292	0.0650804	0.957	0.926	773.347
Peg10	0.0936092	0.0649951	0.345	0.277	1221.69
Parp8	0.00710541	0.0649643	0.194	0.117	110.354
Prkag2	0.00480552	0.0649581	0.295	0.191	75.264
Pgls	0.00825348	0.0648539	0.297	0.2	127.492
Tspan3	0.11087	0.0648538	0.723	0.617	1412.05
Asic2	0.0403344	0.064842	0.392	0.309	576.984
Mirg	0.00989551	0.0648087	0.475	0.349	151.995
Il13ra1	0.0385358	0.0647899	0.399	0.297	553.682
Plcxd3	0.0362059	0.0647442	0.408	0.311	522.56
Ephb2	0.00853742	0.0646212	0.194	0.12	131.715
Apoe	0.00644677	0.0646198	0.137	0.074	100.286
Rabif	0.006473	0.0645736	0.277	0.18	100.681
Cops9	0.0878975	0.0645174	0.95	0.911	1156.47
Dpp6	0.0302013	0.064501	0.797	0.68	440.366
Gdi1	0.0215209	0.0644857	0.944	0.88	320.533
Sppl3	0.0159011	0.0644479	0.518	0.391	240.362
Homer2	0.00370932	0.0644467	0.196	0.114	58.3143
Timm22	0.0254466	0.0643552	0.315	0.226	375.363
Cotl1	0.0178542	0.0643128	0.455	0.334	268.795
1110032A03Rik	0.0403509	0.0642278	0.491	0.391	577.179
Ccdc28a	0.00538206	0.0642261	0.288	0.186	84.0409
Nomo1	0.0382273	0.0642145	0.39	0.3	549.632
Krt10	0.021008	0.0642105	0.349	0.254	313.418
Coq8a	0.000670536	0.0641878	0.092	0.031	10.7453
Rabggtb	0.0482453	0.0641601	0.516	0.394	678.377
Mir9-3hg	0.000366224	0.064124	0.072	0.017	5.88559
Kctd17	0.0133059	0.0640735	0.363	0.251	202.503
Mtx3	0.00849888	0.064064	0.221	0.137	131.163
Men1	0.00171773	0.0639028	0.221	0.123	27.2758
Shisa5	0.0110792	0.0638696	0.293	0.203	169.633
Gnb2	0.0637059	0.0638365	0.732	0.617	871.815
Zfp668	0.00511646	0.0637399	0.117	0.057	79.9908
Slc18a2	0.00583031	0.0637123	0.401	0.286	90.8654
Rgl1	0.00107274	0.0636701	0.279	0.16	17.1124
Chga	0.0187726	0.0636665	0.329	0.229	281.796
Map2k4	0.0210397	0.0636337	0.764	0.671	313.828
Pnmal2	0.0245748	0.0636216	0.977	0.974	363.314
Nipsnap3b	0.0282206	0.0635662	0.16	0.103	414.053
Zdhhc18	0.0120026	0.0634857	0.124	0.069	183.291
Ccdc136	0.0239101	0.0634603	0.399	0.297	354.133
Kcnj10	0.00354911	0.0634539	0.072	0.026	55.8417
Ophn1	0.0212827	0.0634417	0.221	0.149	317.24
Morf4l2	0.0565573	0.0633789	0.91	0.831	782.47
1110065P20Rik	0.0497421	0.0633653	0.696	0.569	697.633
Vamp2	0.0387647	0.0633504	0.971	0.951	556.545
Adcy6	0.0133885	0.0632496	0.293	0.2	203.719
Slc32a1	0.112616	0.0632366	0.811	0.691	1415.7
Mdn1	0.0254816	0.0632288	0.264	0.189	375.853
Rogdi	0.0575459	0.0632136	0.57	0.466	794.652
Sema4a	0.0221467	0.0631782	0.241	0.166	329.322
Ssbp3	0.137941	0.0631731	0.725	0.62	1661.77
Sdr39u1	0.00574922	0.0631653	0.297	0.197	89.6418
Ddr1	0.0035758	0.0631383	0.155	0.083	56.2473
Hbs1l	0.0347276	0.0631342	0.232	0.166	502.648
Slc1a2	0.05921	0.063063	0.248	0.183	815.44
Pi4k2a	0.119762	0.0629982	0.356	0.283	1492.48
Kif17	0.00596584	0.0629859	0.191	0.111	92.9419
Rpl12	0.0456432	0.0629375	0.993	0.994	646.444
Dcaf6	0.00921406	0.0629314	0.198	0.12	141.86
Rdh14	0.0331657	0.0628997	0.277	0.197	481.003
Arhgdig	0.0960272	0.0628988	0.671	0.551	1247.87
Fem1a	0.00746704	0.0628516	0.207	0.126	115.702
Cygb	0.11603	0.0628465	0.489	0.417	1452.35
Deptor	0.000293244	0.0627949	0.068	0.014	4.71859
2410015M20Rik	0.153368	0.0627586	0.709	0.654	1812.19
Swi5	0.0172306	0.0627585	0.836	0.731	259.803
Adcy3	0.0273362	0.0627283	0.286	0.206	401.897
Chrna1os	0.00251238	0.0626783	0.083	0.031	39.7333
Park7	0.0392178	0.0626673	0.592	0.471	562.657
Caskin1	0.0367284	0.0625577	0.444	0.34	529.624
Krt222	0.0121688	0.0625442	0.18	0.111	185.721
Hdac11	0.124382	0.0625414	0.869	0.837	1524.3
Zcchc2	0.00351197	0.0625294	0.119	0.057	55.2713
Nrip1	0.028628	0.0625112	0.18	0.12	419.572
Myo18a	0.0393979	0.0625106	0.385	0.286	565.045
Rtn4	0.163902	0.0624885	0.878	0.829	1915.36
Rmst	0.0731532	0.0624185	0.601	0.491	987.641
Rtca	0.00550672	0.0624148	0.243	0.151	85.9433
Haus8	0.0353241	0.0623252	0.167	0.111	510.857
Rps3	0.00794469	0.062299	1	1	122.881
Zfp617	0.0375833	0.0619398	0.293	0.22	541.125
Cdk16	0.033098	0.0619287	0.306	0.223	480.086
Slc25a17	0.0570663	0.0619284	0.36	0.274	788.657
Mtmr7	0.00554746	0.0619139	0.241	0.149	86.5459
Ppp1r17	0.0123661	0.0618468	0.191	0.123	188.669
Hadhb	0.00577105	0.0618109	0.261	0.166	89.9707
Kdm7a	0.0395423	0.0617642	0.198	0.137	566.918
Pgam1	0.119011	0.061745	0.811	0.751	1484.42
Rpf1	0.00732287	0.0616827	0.153	0.086	113.6
Pdhx	0.00876104	0.0616484	0.268	0.177	135.043
Esco1	0.0119675	0.0616356	0.162	0.097	182.768
Snhg10	0.0100131	0.0616217	0.275	0.18	153.751
Camta2	0.0842137	0.0616017	0.327	0.254	1115.58
Eif5	0.0425057	0.0615517	0.865	0.8	605.707
Mapk3	0.0311808	0.0615481	0.495	0.386	453.806
Irf2bpl	0.0532951	0.0614043	0.482	0.371	740.802
9330182L06Rik	0.198282	0.0614029	0.282	0.234	2197.76
A330069E16Rik	0.587625	0.0612416	0.221	0.2	2771.83
Spg20	0.00290072	0.0611784	0.268	0.166	45.8023
4930447C04Rik	0.00221889	0.0611078	0.207	0.117	35.1538
Upf1	0.0249243	0.0610762	0.243	0.166	368.156
Eps15	0.0385853	0.0609314	0.421	0.32	554.355
Ssr3	0.0568976	0.0608935	0.676	0.563	786.667
Kansl3	0.0493651	0.0608738	0.466	0.366	692.79
Uba1	0.018817	0.0608601	0.453	0.331	282.331
Adgrg1	0.0165174	0.0608226	0.32	0.229	249.379
C1qtnf12	0.00205299	0.0607863	0.198	0.109	32.5523
Kcnc2	0.00474602	0.0607063	0.239	0.151	74.3559
Sdhc	0.0494989	0.0606603	0.491	0.374	694.419
Jund	0.0132733	0.0606516	0.446	0.329	202.046
Lrrc28	0.00719156	0.0606355	0.133	0.071	111.635
Kcnq2	0.0314788	0.0606028	0.691	0.554	457.796
Atg12	0.0279445	0.0605526	0.297	0.214	410.225
Arntl	0.0397188	0.0605456	0.169	0.114	569.209
Sgsm2	0.0903155	0.0604901	0.473	0.394	1183.4
Focad	0.00341923	0.0604886	0.153	0.08	53.846
Cdk5r2	0.0218963	0.060482	0.532	0.4	325.817
Tmem161a	0.00239732	0.0604753	0.173	0.094	37.9472
Zfp651	0.0156415	0.0604606	0.207	0.134	236.672
Smad7	0.0152452	0.0604602	0.16	0.097	230.935
Srr	0.0101945	0.0604172	0.221	0.14	156.466
Itsn2	0.0112523	0.0603891	0.378	0.266	172.216
Atp6v0a1	0.153891	0.0603804	0.741	0.651	1817.14
Gpr137	0.0608072	0.0603663	0.264	0.197	835.613
Nr2f6	0.00915672	0.0603354	0.155	0.089	141.004
Zdhhc17	0.0431094	0.060197	0.466	0.371	613.447
Gm42722	0.00735394	0.0601466	0.113	0.057	114.037
Atg16l2	0.0087438	0.060144	0.178	0.106	134.803
Gps1	0.0729174	0.0601254	0.36	0.277	984.676
Akt1s1	0.0167127	0.0601025	0.25	0.169	252.262
Sac3d1	0.0509462	0.0600975	0.176	0.123	712.686
Ncoa3	0.0135926	0.0600846	0.133	0.074	206.675
Far1	0.0420995	0.0600834	0.477	0.369	600.381
Ift20	0.0507253	0.060034	0.759	0.626	710.052
Maob	0.0206008	0.0599651	0.115	0.066	307.714
Thnsl1	0.0063319	0.0599301	0.178	0.103	98.5433
Pyurf	0.00707906	0.0598804	0.151	0.083	109.959
Cisd2	0.0640518	0.0598551	0.538	0.446	876.037
Cish	9.68131e-05	0.0597864	0.056	0.006	1.56392
Tubb4a	0.149215	0.0597632	0.836	0.749	1773.56
Chmp1a	0.0130897	0.0597388	0.329	0.223	199.344
Rbm28	0.0137407	0.0596972	0.277	0.186	208.775
Dnm3	0.0361458	0.0596807	0.782	0.657	521.764
Plscr3	0.00470745	0.0595008	0.122	0.06	73.7658
Ercc3	0.00273506	0.0594822	0.142	0.071	43.2195
Jmy	0.00731294	0.0594548	0.259	0.166	113.453
Rpl38	0.00990004	0.0594126	1	1	152.055
Ap4s1	0.0249399	0.059383	0.333	0.234	368.362
Limk1	0.00716261	0.0593403	0.309	0.203	111.207
Rps6ka5	0.00742452	0.0593179	0.205	0.126	115.095
Gns	0.023407	0.0592778	0.502	0.377	347.336
Mrap2	0.276269	0.0592494	0.333	0.289	2565.16
Nol9	0.00406901	0.059203	0.11	0.051	63.8794
Runx1t1	0.0190988	0.0591335	0.173	0.109	286.253
Usp9x	0.075728	0.0591202	0.865	0.794	1014.98
Sipa1l1	0.0214695	0.0590382	0.372	0.263	319.788
Gnl3l	0.205677	0.0590264	0.928	0.88	2261.22
Hmgcs1	0.0466867	0.0590092	0.637	0.517	657.722
Abhd11	0.0745028	0.0589773	0.302	0.234	1003.55
Med20	0.00208983	0.0589191	0.164	0.086	33.1301
Stmn3	0.119812	0.0588884	0.941	0.874	1492.86
Tiparp	0.00493013	0.0588874	0.083	0.034	77.1566
Slc25a22	0.220796	0.0588277	0.613	0.511	2306.21
March4	0.0187832	0.0587599	0.164	0.103	281.88
Commd9	0.0213212	0.058759	0.221	0.149	317.75
Pgr15l	0.163338	0.0587297	0.507	0.44	1910.56
Hscb	0.0180153	0.0586774	0.153	0.094	271.131
Zdhhc14	0.0235136	0.0586579	0.185	0.12	348.753
Ociad1	0.13335	0.0586517	0.809	0.734	1615.4
Tekt2	0.0183612	0.0586428	0.101	0.054	276.06
Hgsnat	0.0114635	0.0584939	0.151	0.089	175.345
Nucb2	0.0233061	0.058457	0.218	0.149	345.909
Kctd18	0.0571988	0.0584351	0.14	0.094	790.315
Tekt1	0.0217634	0.0584067	0.117	0.066	323.904
Rbbp9	0.0362551	0.0583705	0.243	0.171	523.125
Dhx32	0.00502102	0.0583074	0.189	0.109	78.5288
Zbtb16	0.0452631	0.0583044	0.054	0.026	641.604
Rpl32	0.011374	0.0582948	1	1	174.033
Mapk8ip1	0.0833849	0.0582923	0.676	0.563	1106.02
Dpf1	0.0295427	0.0581785	0.252	0.18	431.442
Prrc1	0.00372246	0.0581727	0.149	0.077	58.5171
Ak4	0.198526	0.0581672	0.351	0.3	2199.87
Rpl24	0.023609	0.0581555	1	1	350.003
Rab3ip	0.00791738	0.0580804	0.128	0.069	122.466
Dvl1	0.0265182	0.0580639	0.286	0.203	390.374
Nat8l	0.0562058	0.0579778	0.518	0.423	778.057
Mafg	0.04251	0.0579135	0.453	0.351	605.725
Zfp575	0.00594442	0.0578113	0.167	0.094	92.62
Rasgrp2	0.0175211	0.057779	0.302	0.214	263.955
Get4	0.0517349	0.0577568	0.311	0.234	721.443
Gprasp2	0.0712408	0.0577299	0.937	0.874	964.672
Gstm7	0.162364	0.0576688	0.245	0.197	1900.14
Aacs	0.00634977	0.057631	0.11	0.054	98.8151
Bcam	0.0171542	0.0576213	0.131	0.074	258.702
Ggh	0.00159561	0.0576035	0.11	0.046	25.3622
Arf3	0.0873452	0.0575376	0.914	0.866	1150.69
Glb1	0.0145622	0.0574946	0.095	0.049	220.866
Mrpl24	0.0403101	0.0574932	0.347	0.263	576.717
Krtcap2	0.0171362	0.0574471	0.597	0.451	258.448
Lrrc3	0.0053073	0.0574371	0.108	0.051	82.9107
Ankib1	0.0199885	0.0574239	0.324	0.231	299.048
Gprin3	0.0794932	0.0574203	0.153	0.106	1059.64
Lrrc49	0.0600874	0.0573911	0.266	0.197	826.683
Rad21	0.0468351	0.0573896	0.57	0.446	659.579
Tmem132a	0.0121305	0.0573849	0.23	0.149	185.172
Tcf4	0.0549652	0.057379	0.471	0.374	762.258
Cdh4	0.0239575	0.0573683	0.106	0.06	354.81
Fbxl3	0.0451813	0.0573256	0.288	0.214	640.626
Tmem30a	0.132977	0.0573205	0.867	0.794	1611.95
Diexf	0.0145909	0.0573075	0.079	0.037	221.286
Arhgef1	0.0228591	0.0572352	0.329	0.234	339.572
Capn7	0.0758811	0.05719	0.295	0.223	1016.88
Tax1bp1	0.0160159	0.0571671	0.426	0.32	242.017
Tpp1	0.0105589	0.0571633	0.221	0.14	161.92
Stat3	0.00334516	0.0571188	0.223	0.129	52.6964
Pcdh20	0.163592	0.0571072	0.448	0.38	1912.55
Slc38a7	0.0174341	0.0570796	0.149	0.091	262.732
Cspg5	0.120135	0.0570668	0.727	0.626	1495.92
Ccz1	0.0284997	0.0570646	0.248	0.174	417.862
Taf1	0.0504838	0.0570627	0.439	0.343	707.026
Rnf215	0.00221948	0.0570532	0.2	0.111	35.161
Disp3	0.00777132	0.0570139	0.178	0.103	120.284
Tmem70	0.0343716	0.0570085	0.268	0.191	497.632
1810013L24Rik	0.0146804	0.0570049	0.264	0.177	222.584
Ptprk	0.0256244	0.057001	0.532	0.431	377.831
Rhot1	0.0431964	0.0569987	0.306	0.231	614.599
Trnp1	0.021277	0.0569984	0.214	0.143	317.177
Lxn	0.00281116	0.0569898	0.101	0.043	44.4107
Spag9	0.131999	0.0568778	0.833	0.734	1602.07
Sqle	0.0137055	0.0568578	0.268	0.18	208.255
Prps1	0.0317264	0.0568557	0.471	0.354	461.207
Cog3	0.00415473	0.0568539	0.142	0.074	65.2001
Fkbp4	0.165439	0.0568517	0.484	0.406	1929.36
Aldh9a1	0.0230118	0.0568486	0.155	0.097	341.725
Syndig1	0.0179116	0.0568377	0.115	0.066	269.641
Asns	0.00636944	0.0567975	0.124	0.063	99.1085
Atxn7l1	0.0941016	0.0567615	0.282	0.217	1226.52
Ptcd3	0.030783	0.0567585	0.255	0.18	448.416
Smad5	0.0634352	0.0567015	0.284	0.214	868.491
Tm2d2	0.0721966	0.0566775	0.311	0.237	975.664
Fcor	0.00734582	0.0566727	0.144	0.08	113.919
Cfap36	0.0287946	0.0566233	0.462	0.354	421.869
Mib2	0.00504952	0.0566147	0.248	0.154	78.9695
Cldn12	0.0208955	0.0565945	0.176	0.111	311.865
Oxt	0.00198479	0.0565811	0.081	0.029	31.4787
Arf2	0.0651663	0.0565781	0.266	0.197	889.65
Zfp652	0.0117207	0.0565455	0.214	0.137	179.069
2610035D17Rik	0.0190145	0.0565302	0.126	0.071	285.084
Olfm1	0.243745	0.0565281	0.707	0.634	2489.61
Nars2	0.00693167	0.0564918	0.097	0.046	107.711
Sh3gl2	0.0725868	0.0564464	0.516	0.42	980.575
Nrxn2	0.0566599	0.0564078	0.964	0.931	783.72
Elk1	0.0127159	0.056397	0.248	0.16	193.804
Selenow	0.0176824	0.0563588	1	0.997	266.297
Mettl23	0.043717	0.0562998	0.221	0.157	621.525
Snx7	0.0198703	0.0562825	0.124	0.071	297.378
2300009A05Rik	0.123688	0.0562445	0.597	0.506	1532.37
Hspa5	0.0643575	0.0562364	0.572	0.469	879.638
Zbtb44	0.0418238	0.0562139	0.227	0.16	596.659
Tbc1d9b	0.0220324	0.0561863	0.304	0.214	327.732
Prrt3	0.00258793	0.0561849	0.131	0.063	40.9177
6430548M08Rik	0.207993	0.0561615	0.527	0.446	2281.06
Capzb	0.0903427	0.056134	0.635	0.54	1183.67
Atp1a1	0.0177046	0.0561291	0.462	0.34	266.614
Ppp1r26	0.0181005	0.0561086	0.162	0.1	272.303
Zfp46	0.00581568	0.0560899	0.119	0.06	90.6548
Pdgfa	0.133131	0.0559903	0.64	0.54	1613.15
Lysmd1	0.0123787	0.0559664	0.146	0.086	188.849
Ikbkg	0.00461774	0.0559487	0.23	0.134	72.383
Pcyox1	0.088866	0.0559343	0.547	0.451	1167.17
Vps26b	0.0430231	0.0558692	0.387	0.289	612.391
Bpnt1	0.0221746	0.0558285	0.477	0.354	329.714
D10Jhu81e	0.0125092	0.0557749	0.212	0.134	190.766
Cib2	0.120593	0.0557625	0.667	0.551	1500.41
Fkbp14	0.0142098	0.0557261	0.11	0.06	215.676
Pxdn	0.0047389	0.0557227	0.101	0.046	74.2492
Mtch1	0.119765	0.0557179	0.914	0.826	1492.4
Coq10b	0.116845	0.0557099	0.169	0.129	1461.74
Psmb1	0.191149	0.0556931	0.842	0.791	2135.14
Hectd3	0.0571999	0.0556164	0.25	0.186	790.274
Osbpl7	0.00461598	0.0556071	0.11	0.051	72.3601
Trip4	0.294574	0.0556016	0.363	0.303	2645.87
Tmed5	0.0230221	0.0554977	0.257	0.18	341.855
Manba	0.0113641	0.0554861	0.101	0.051	173.893
Tcirg1	0.00124758	0.0554374	0.074	0.023	19.879
Rnmt	0.0184772	0.0554135	0.459	0.337	277.509
Leprotl1	0.0318241	0.0554124	0.426	0.32	462.436
Cetn4	0.0588216	0.0554112	0.257	0.191	810.973
Vps39	0.0166424	0.0553951	0.39	0.283	251.216
Cldn11	0.00525963	0.0553473	0.106	0.049	82.1975
E230001N04Rik	0.000807692	0.0552756	0.097	0.034	12.9231
Tfcp2	0.0365309	0.0552468	0.266	0.189	526.812
Atp7a	0.0023976	0.055235	0.061	0.017	37.9492
Rgs5	0.00780111	0.0551872	0.027	0.003	120.738
Rab40b	0.0175466	0.0551837	0.133	0.077	264.322
Spock1	0.180448	0.0551571	0.845	0.794	2048.45
Lin7c	0.083442	0.0551193	0.52	0.423	1106.61
Smim13	0.0370777	0.0550136	0.579	0.463	534.363
Gm42517	0.00172747	0.0549734	0.122	0.054	27.4288
Xpa	0.0615873	0.0549704	0.257	0.189	845.285
Acly	0.0588961	0.0549601	0.536	0.431	811.882
Usp5	0.256034	0.05496	0.543	0.454	2576.47
Rplp1	0.0442773	0.0548685	1	1	628.871
Khnyn	0.0605142	0.0548196	0.133	0.089	832.071
Naaa	0.00782884	0.0547966	0.264	0.171	121.151
Snd1	0.0132401	0.0547458	0.227	0.149	201.554
Pim2	0.00657003	0.0547124	0.333	0.217	102.177
Dvl2	0.00501221	0.0546852	0.167	0.091	78.401
Gm16701.1	0.00282605	0.0546379	0.088	0.034	44.6403
1700037H04Rik	0.0999192	0.0546333	0.536	0.434	1291.46
Fam91a1	0.0377402	0.054613	0.448	0.351	543.308
Gjb6	0.00524259	0.0546045	0.065	0.023	81.9365
Serinc3	0.0404009	0.0545655	0.495	0.386	577.854
Chchd5	0.263753	0.0545475	0.23	0.191	2496.16
Col11a1	0.0203823	0.0544805	0.072	0.034	304.614
Bex4	0.09462	0.0544293	0.655	0.563	1232.24
1500009L16Rik	0.198423	0.0543785	0.649	0.577	2198.92
Entpd6	0.166237	0.0543499	0.475	0.397	1936.66
Gm996	0.0286049	0.0543167	0.207	0.14	419.319
Mfsd14b	0.00580532	0.0542675	0.322	0.209	90.4991
Atrnl1	0.026185	0.0542571	0.135	0.083	385.731
Hapln4	0.105597	0.0542336	0.286	0.223	1354.07
Mink1	0.0205176	0.0541529	0.3	0.209	306.553
Hif1a	0.0378678	0.0541029	0.448	0.346	544.879
Lzts2	0.06482	0.054052	0.178	0.126	885.506
Gpr27	0.0858218	0.0540313	0.392	0.311	1134.05
Ube2w	0.0203069	0.0540292	0.444	0.329	303.528
Cdh24	0.01187	0.0540272	0.106	0.054	181.302
Adamtsl2	0.00752004	0.0540222	0.072	0.029	116.493
Arl5a	0.0661462	0.053966	0.536	0.431	901.838
Gpr101	0.113315	0.053954	0.243	0.191	1423.12
Ublcp1	0.0845707	0.0539247	0.264	0.206	1119.63
Ciao1	0.00818909	0.0538306	0.236	0.151	126.53
Zzef1	0.0103029	0.0537932	0.453	0.329	158.078
Slc25a25	0.0702969	0.0537234	0.387	0.311	953.648
Slc43a2	0.0131884	0.0537136	0.194	0.12	200.793
Oxnad1	0.0116472	0.0536999	0.101	0.051	178.04
Cul7	0.0088674	0.0536458	0.182	0.109	136.638
Immp1l	0.0395106	0.0536112	0.329	0.237	566.502
Itpkb	0.0267433	0.0536038	0.081	0.043	393.528
Phc3	0.019426	0.053596	0.39	0.277	291.002
Ttc13	0.0274402	0.0535813	0.288	0.209	403.316
Cdc23	0.0429542	0.0535748	0.266	0.194	611.495
Pfkfb3	0.00710832	0.0535204	0.122	0.063	110.392
P4ha1	0.00951734	0.0533335	0.227	0.146	146.396
Mier2	0.0355041	0.0533306	0.16	0.106	513.318
Gpc1	0.0378444	0.0533274	0.221	0.154	544.657
Necab3	0.0218487	0.0532743	0.124	0.071	325.13
Lipa	0.0662355	0.0532543	0.133	0.089	902.989
Airn	0.00123865	0.0532434	0.054	0.011	19.7404
Apoo	0.0507059	0.053187	0.155	0.106	709.933
Deaf1	0.0563473	0.0531855	0.486	0.371	779.678
Cmtm4	0.0278173	0.0531574	0.399	0.297	408.496
Tmem141	0.0295675	0.0531485	0.336	0.243	431.774
Dusp12	0.00766489	0.0531419	0.149	0.083	118.668
Nt5m	0.0759832	0.0530955	0.291	0.217	1017.72
Tomm7	0.0814768	0.0529519	0.885	0.817	1083.89
Uchl1	0.25425	0.0529293	0.851	0.809	2563.86
Dnajc21	0.080278	0.0529075	0.423	0.331	1069.62
Ahcyl1	0.0718608	0.0529012	0.507	0.4	972.133
Nsmaf	0.0389191	0.0528782	0.176	0.117	558.567
Slc6a7	0.0266445	0.0528612	0.297	0.209	392.181
Klhl12	0.0535943	0.0528587	0.277	0.2	744.639
Mydgf	0.00168142	0.0528428	0.306	0.183	26.706
Frat1	0.0156979	0.0528039	0.23	0.151	237.462
Prr7	0.0212756	0.0527381	0.324	0.229	317.177
Oprl1	0.0467236	0.0527235	0.541	0.431	658.149
Tgfbr1	0.0336074	0.0527147	0.104	0.06	487.072
Nat8f1	0.0457056	0.0526925	0.11	0.069	647.191
Ptrh1	0.00693822	0.0526754	0.059	0.02	107.806
Alg10b	0.162648	0.0525684	0.356	0.294	1903.15
Ddit4	0.0131903	0.0524855	0.176	0.109	200.809
Ninj1	0.010002	0.0524549	0.221	0.137	153.6
Mpc2	0.0150915	0.0524169	0.446	0.311	228.696
Dtymk	0.0493539	0.0524126	0.189	0.131	692.682
Hba-a1	9.0859e-05	0.0523338	0.043	0	1.46801
Exoc8	0.0790084	0.0522643	0.18	0.131	1053.73
Cox19	0.0858598	0.0522035	0.327	0.254	1134.38
Rab24	0.0916256	0.052199	0.556	0.429	1198.65
Emc2	0.0387146	0.052176	0.304	0.217	556.018
Klhdc8b	0.00632655	0.0521579	0.286	0.183	98.4665
Zfp760	0.0245919	0.0521565	0.131	0.077	363.542
Srsf12	0.00636659	0.0521053	0.374	0.251	99.0705
Dbi	0.0432967	0.0520927	0.214	0.154	615.939
H2-Q2	0.0714409	0.0520334	0.131	0.089	967.095
Ndufa13	0.163481	0.0520164	0.91	0.837	1911.59
Ctsl	0.0575952	0.0520117	0.239	0.174	795.16
Ubp1	0.0326978	0.0520106	0.356	0.257	474.51
Dap	0.0220964	0.0519903	0.077	0.037	328.595
Ntsr2	0.0210338	0.051972	0.092	0.049	313.783
Slain1	0.0185516	0.0519535	0.155	0.094	278.589
Extl2	0.070406	0.0519433	0.378	0.291	954.917
Fgf11	0.0142259	0.0519326	0.05	0.017	215.906
Camk2g	0.0792348	0.0518483	0.723	0.637	1056.44
Rab27a	0.0488163	0.0518421	0.234	0.169	685.576
Phf5a	0.0545261	0.0518053	0.297	0.217	756.932
Ap2m1	0.0501115	0.0517833	0.813	0.723	702.213
Tbc1d22b	0.0518839	0.0517637	0.23	0.166	723.106
Cbln2	0.857453	0.0517563	0.11	0.109	1458.53
Agpat1	0.0733939	0.0517504	0.302	0.229	990.378
Ldhb	0.202549	0.0517247	0.414	0.354	2234.52
Fam102b	0.0380271	0.0516969	0.196	0.131	547.02
B9d2	0.0268014	0.0516765	0.126	0.074	394.355
Tbc1d23	0.0155093	0.0516252	0.327	0.226	234.796
Exd2	0.0056915	0.0516191	0.205	0.12	88.7646
Ap3s1	0.0427159	0.0515749	0.511	0.391	608.402
Dgat1	0.0219774	0.0515618	0.142	0.086	326.98
Dmrtc1a	0.0600776	0.0515094	0.167	0.117	826.607
Inpp5k	0.015175	0.0514859	0.146	0.086	229.947
Nit1	0.0235679	0.0514665	0.315	0.223	349.465
Apbb1	0.154691	0.0514559	0.664	0.58	1825.05
Htra1	0.000798743	0.051401	0.068	0.017	12.7839
Gpr162	0.0838313	0.0513699	0.302	0.231	1111.1
Tmem215	0.0710858	0.0513207	0.106	0.069	962.999
Nap1l1	0.415305	0.0513164	0.903	0.874	2816.19
Mrpl13	0.0415113	0.0512883	0.25	0.177	592.822
Nfxl1	0.0332311	0.0512851	0.135	0.086	481.884
Npc1	0.0721396	0.051214	0.268	0.203	974.967
Trap1	0.0119033	0.0512039	0.097	0.049	181.799
Brpf3	0.063341	0.0510601	0.122	0.08	867.392
Rpl17	0.0082964	0.0509827	1	1	128.138
Saxo2	0.0248549	0.0509663	0.194	0.126	367.207
Ddx28	0.0216078	0.0509292	0.068	0.031	321.74
Fam227a	0.044722	0.0508831	0.135	0.086	634.874
Map1lc3a	0.255781	0.0508536	0.89	0.837	2575.2
Ncapd2	0.0112183	0.0508536	0.081	0.037	171.718
Rpn1	0.158495	0.0508516	0.381	0.306	1861.2
Tspyl2	0.039612	0.0508427	0.714	0.591	567.838
Paqr8	0.0200854	0.0508312	0.126	0.074	300.376
Tmcc2	0.0440554	0.0508026	0.295	0.217	625.983
Npy5r	0.0253273	0.0507998	0.185	0.12	373.729
Slc6a17	0.15729	0.0506397	0.786	0.669	1848.94
Cnih2	0.176286	0.0506311	0.831	0.76	2017.06
Tpp2	0.0869534	0.0506153	0.273	0.209	1146.65
Ndufs4	0.0420464	0.0506044	0.448	0.34	599.665
Kmt5c	0.00308918	0.0506029	0.097	0.04	48.7318
Lysmd2	0.115998	0.0505257	0.43	0.349	1452.18
Srpr	0.10909	0.0505003	0.351	0.274	1392.75
Efnb3	0.12527	0.0504929	0.802	0.703	1532.55
Ubl3	0.20592	0.0504533	0.622	0.549	2263.06
Dgcr2	0.25395	0.0503988	0.698	0.589	2561.6
Med9	0.0930262	0.0503856	0.187	0.137	1214.83
Pgk1	0.0318477	0.0503634	0.592	0.457	462.684
Afg3l2	0.0209592	0.050362	0.203	0.131	312.733
2310022A10Rik	0.0451693	0.0503542	0.209	0.146	640.501
Dock10	0.0513162	0.0503523	0.083	0.049	715.964
Mogs	0.00660981	0.0503106	0.081	0.034	102.769
Rab26	0.0479584	0.0502965	0.309	0.229	674.583
Psd	0.0548099	0.0502856	0.554	0.437	760.377
Dpp3	0.00701007	0.0502295	0.117	0.06	108.908
Abi2	0.114939	0.0500888	0.752	0.643	1441.33
Banp	0.088603	0.0500292	0.234	0.177	1164.69
Slc44a1	0.0181467	0.0499988	0.097	0.051	272.963
Sparcl1	0.0532371	0.0499737	0.126	0.083	740.209
Ppp5c	0.177286	0.0499263	0.34	0.283	2022.3
B230354K17Rik	0.0283988	0.0499139	0.189	0.123	416.582
Psmg4	0.00471263	0.0498746	0.203	0.12	73.8422
Cdc42se1	0.0527762	0.0498645	0.176	0.12	734.38
Prr12	0.055443	0.0498567	0.309	0.234	768.329
Aifm3	0.019431	0.0497901	0.221	0.149	291.057
Ccs	0.019406	0.0497614	0.097	0.051	290.722
Rhoq	0.0204924	0.0497573	0.113	0.063	306.197
Tbcel	0.017505	0.0497478	0.351	0.251	263.747
Slc30a10	0.00732693	0.0497215	0.182	0.106	113.641
Psmb5	0.0142077	0.0497034	0.365	0.263	215.659
Tnrc6c	0.0181184	0.0496328	0.552	0.417	272.555
Itgb1	0.0290592	0.0496243	0.196	0.129	425.427
Eef1akmt1	0.0206091	0.049512	0.191	0.123	307.817
Degs1	0.120778	0.049492	0.34	0.277	1502
Cgref1	0.0269147	0.0494712	0.214	0.14	395.997
Kdelr2	0.18057	0.049443	0.347	0.291	2049.29
Casc3	0.0646473	0.0494411	0.419	0.317	883.211
Ankrd13c	0.0507942	0.0494379	0.405	0.309	710.763
Trp53i11	0.0616541	0.0494266	0.236	0.174	846.017
Fah	0.00522681	0.0494217	0.074	0.029	81.7003
Lin37	0.0776368	0.0493915	0.221	0.16	1037.54
Tef	0.158992	0.0493612	0.653	0.566	1866.09
Numa1	0.0277944	0.0492732	0.432	0.326	408.188
Nosip	0.0317843	0.0492693	0.194	0.131	461.984
Rara	0.00377482	0.0492651	0.068	0.023	59.3251
Grik5	0.0415959	0.0492644	0.536	0.42	593.864
Rxra	0.0383773	0.0492642	0.209	0.146	551.635
Esyt2	0.215972	0.0492634	0.255	0.206	2269.01
Syt7	0.0922355	0.0492391	0.446	0.351	1206.07
Mfsd8	0.0694873	0.0492317	0.092	0.057	943.499
Ormdl3	0.0570295	0.0492057	0.374	0.286	788.319
Gm17322	0.000566439	0.0491991	0.047	0.006	9.08795
9430015G10Rik	0.0416791	0.0491727	0.086	0.049	594.928
Nanos3	0.00886048	0.0491684	0.108	0.054	136.549
Grin1	0.0362909	0.049118	0.721	0.617	523.568
Ank	0.0668633	0.0490691	0.311	0.237	911.013
Mthfsl	0.0562623	0.0490567	0.223	0.163	778.67
D730003I15Rik	0.0256626	0.0490242	0.18	0.117	378.293
Cnp	0.0362672	0.0489807	0.203	0.137	523.264
1700016K19Rik	0.0225651	0.0489776	0.072	0.034	335.34
Trpm7	0.0194416	0.0489725	0.273	0.186	291.197
Prps2	0.0086219	0.0489309	0.155	0.089	132.976
A430027H14Rik	0.0025719	0.0489266	0.065	0.02	40.6669
Gabarap	0.128106	0.0488474	0.838	0.743	1561.23
Nob1	0.0356207	0.0488295	0.245	0.171	514.826
Ctns	0.0076328	0.0488255	0.097	0.046	118.186
Ampd3	0.0123838	0.0488221	0.106	0.054	188.903
Zfp946	0.0161484	0.0487649	0.137	0.08	243.954
Col16a1	0.0161277	0.0487539	0.074	0.034	243.69
Armc6	0.0428014	0.0487512	0.158	0.106	609.491
Skap2	0.00843678	0.048713	0.043	0.011	130.255
Cxcl14	0.00424441	0.0486862	0.047	0.011	66.5905
Rpl30	0.0190067	0.0486845	0.998	0.997	285.005
Phka1	0.0499881	0.0486493	0.14	0.091	700.583
Fkbpl	0.00730911	0.0486074	0.086	0.037	113.401
Sp3os	0.0596897	0.0485932	0.119	0.077	821.509
Tmem38a	0.0950711	0.0485222	0.257	0.197	1237.35
Sobp	0.154558	0.048492	0.568	0.474	1823.63
Gcdh	0.0114398	0.0484812	0.126	0.069	175.006
Ythdf1	0.0491731	0.0484691	0.261	0.189	690.342
1810058I24Rik	0.0315122	0.0484239	0.3	0.214	458.25
Erp29	0.167918	0.0484182	0.842	0.791	1950.71
Armcx5	0.077815	0.0483904	0.232	0.174	1039.22
Tbc1d32	0.0362444	0.0483522	0.185	0.123	523.006
Coq10a	0.033839	0.0483422	0.207	0.14	490.191
Gramd1a	0.0182518	0.048315	0.484	0.36	274.508
Rec8	0.0545485	0.0483051	0.088	0.051	757.187
Dpy19l1	0.145915	0.0482953	0.236	0.186	1741.05
Prpf40b	0.0238873	0.0482807	0.277	0.191	353.866
Foxn2	0.0405267	0.0481762	0.083	0.046	579.572
Polb	0.134715	0.0481163	0.405	0.334	1629.91
Eif2b1	0.0567868	0.0479843	0.153	0.103	785.305
Tmem198	0.0565839	0.0479668	0.133	0.086	782.781
Casz1	0.0535631	0.0478986	0.106	0.066	744.26
Qrfpr	0.00320011	0.0478789	0.032	0.003	50.4593
Pak4	0.0212256	0.0478616	0.077	0.037	316.516
Zfp758	0.0242801	0.0478498	0.099	0.054	359.176
D6Wsu163e	0.0334753	0.0478122	0.131	0.08	485.224
Arhgef40	0.00886298	0.047801	0.279	0.186	136.579
Tatdn3	0.00930285	0.0477892	0.14	0.077	143.18
Ints3	0.0426615	0.0477785	0.331	0.243	607.714
Sema6b	0.0847215	0.0477776	0.41	0.329	1121.29
Ebp	0.0116588	0.0477417	0.086	0.04	178.205
Ankrd10	0.0359987	0.0476442	0.392	0.289	519.857
Gm10037	0.0714485	0.0476233	0.11	0.071	967.127
Rnf19a	0.0570525	0.047622	0.131	0.086	788.579
Agtpbp1	0.150843	0.0476094	0.486	0.389	1788.24
Ddx27	0.0391158	0.0475851	0.142	0.091	561.233
Orc2	0.04905	0.0475792	0.185	0.126	688.761
Tle1	0.0032691	0.0475691	0.189	0.106	51.5276
Fam78b	0.115704	0.0475084	0.122	0.086	1449.31
Ube2b	0.0539877	0.0474961	0.84	0.731	750.052
Rps16	0.0241713	0.0474581	1	0.997	357.687
Ppa2	0.00666664	0.0474568	0.176	0.1	103.646
Lrrn1	0.121386	0.047438	0.131	0.094	1508.71
F3	0.00715022	0.0474375	0.072	0.029	111.021
Cyb5r1	0.00514413	0.0473963	0.097	0.043	80.4182
Mtg1	0.0507065	0.0473186	0.14	0.091	709.891
Ghr	0.0829345	0.0473161	0.09	0.057	1100.87
Fam57a	0.0483098	0.0473069	0.077	0.043	679.139
Dlgap3	0.123779	0.0472526	0.178	0.131	1533.37
Hcn1	0.517511	0.0472493	0.383	0.357	2774.38
Hnrnph2	0.171357	0.047235	0.423	0.346	1980.2
Thoc1	0.0556813	0.0472347	0.266	0.194	771.464
Eif3d	0.129929	0.0471836	0.327	0.254	1580.72
Slc25a46	0.149859	0.0471424	0.475	0.386	1779.43
1810037I17Rik	0.0652314	0.0471354	0.732	0.614	890.344
Ramp1	0.000803945	0.0471284	0.045	0.006	12.8655
Nyap1	0.0464507	0.0471085	0.554	0.446	656.302
Usf2	0.0307047	0.0470878	0.457	0.343	447.337
Lima1	0.0504546	0.0470351	0.135	0.089	706.666
Psenen	0.081247	0.0470214	0.426	0.334	1080.99
Zfp712	0.00344822	0.0469816	0.059	0.017	54.2922
Atp6v0d1	0.143516	0.0469675	0.678	0.549	1716.74
Tmem86a	0.0258836	0.0469051	0.079	0.04	381.446
Csnk1g3	0.0303459	0.0469044	0.462	0.34	442.353
Efemp1	0.00288037	0.0469026	0.038	0.006	45.4839
Wdr82	0.0190186	0.0468954	0.631	0.5	285.127
Ssr2	0.0863989	0.0468814	0.315	0.246	1140.38
Mepce	0.0377314	0.0468563	0.209	0.146	543.219
Mettl21a	0.041099	0.0468417	0.097	0.057	587.305
Gprc5b	0.0481514	0.0468289	0.097	0.057	677.153
Kifc2	0.0211498	0.0468215	0.444	0.32	315.428
Erlin2	0.00409733	0.0468115	0.396	0.269	64.3117
Sesn2	0.0142294	0.0468108	0.108	0.057	215.931
Panx2	0.0372666	0.0468033	0.198	0.134	536.9
Tmem229b	0.076904	0.0467819	0.135	0.091	1028.82
Slc12a6	0.0626712	0.0467738	0.405	0.303	858.783
Washc5	0.0170674	0.0467499	0.185	0.114	257.428
Plpp5	0.0213631	0.0466851	0.135	0.08	318.289
Nt5c3	0.153174	0.0466835	0.318	0.26	1810.51
P4hb	0.0503691	0.0466816	0.514	0.389	705.571
Zbtb5	0.0503631	0.0466776	0.081	0.046	705.537
Adprh	0.105844	0.0466734	0.369	0.289	1356.4
Nudt1	0.00895357	0.0466367	0.088	0.04	137.939
Ypel4	0.0381273	0.046629	0.34	0.246	548.271
Ddx21	0.0604367	0.0466244	0.133	0.089	831.185
Urgcp	0.13623	0.0466101	0.302	0.24	1644.57
Fndc9	0.0572047	0.0465702	0.462	0.363	790.283
Rps12-ps3	0.028197	0.0465661	0.124	0.074	413.735
Atp1a3	0.111791	0.0465607	0.851	0.8	1410.13
Smad4	0.0508075	0.0465584	0.223	0.157	710.899
Nceh1	0.132196	0.0465333	0.408	0.329	1603.81
Ppp1r1a	0.026084	0.04653	0.597	0.449	384.322
Ece2	0.032911	0.0465239	0.304	0.217	477.505
Tbc1d9	0.0355645	0.0465068	0.39	0.289	514.049
Kif13b	0.0184343	0.0465033	0.09	0.046	276.883
Acat1	0.146142	0.0464466	0.39	0.314	1743.03
Atp6v1g2	0.0937458	0.046436	0.842	0.769	1222.63
Ephx4	0.00335426	0.0464349	0.043	0.009	52.8295
Pcnx4	0.0663776	0.0464201	0.282	0.211	904.66
Sf3a3	0.0844964	0.0463831	0.167	0.117	1118.9
Leprot	0.0142923	0.046365	0.162	0.097	216.857
Zbtb33	0.0308868	0.0463497	0.187	0.123	449.711
Zfp369	0.119048	0.0463343	0.16	0.12	1484.77
Cldn1	0.00922933	0.0462952	0.106	0.051	142.086
Slc25a11	0.0687085	0.0462909	0.468	0.369	933.955
Ndufab1	0.315313	0.0462334	0.66	0.569	2744.48
Setd2	0.0383929	0.0461351	0.444	0.326	551.821
Neurl4	0.0179259	0.0460955	0.212	0.134	269.839
Elovl6	0.0774612	0.0460813	0.412	0.32	1035.42
Zfp120	0.0800877	0.0460525	0.223	0.163	1067.17
Fbxo25	0.0636101	0.0460451	0.441	0.343	870.632
Rpl27	0.117778	0.0460301	0.973	0.92	1471.64
Atp5c1	0.0974511	0.0460285	0.745	0.629	1264.04
Ss18l1	0.0858652	0.0459839	0.41	0.323	1134.37
Bcat1	0.0969012	0.0459666	0.507	0.394	1257.58
Mpi	0.0324157	0.0459106	0.113	0.066	470.546
Brinp2	0.0810318	0.0458739	0.378	0.297	1078.45
Rcan3	0.0479856	0.0458595	0.414	0.314	674.917
Anapc4	0.0799243	0.0458373	0.236	0.177	1065.23
Rps27a	0.0181883	0.0458266	1	1	273.57
Guk1	0.368314	0.0458138	0.863	0.771	3004.7
Snx19	0.0591093	0.0457735	0.225	0.163	814.348
Gprin2	0.0895039	0.0457585	0.133	0.091	1174.02
Myadm	0.0345018	0.0457441	0.27	0.194	499.449
Rpl26	0.0260955	0.0457214	1	1	384.465
Gdf11	0.0220104	0.0457029	0.198	0.129	327.427
Oxct1	0.173519	0.0457019	0.529	0.437	2000.67
Zfp707	0.0215629	0.0457008	0.088	0.046	321.114
Helq	0.0053742	0.0456975	0.092	0.04	83.9235
Atf4	0.138097	0.0456868	0.617	0.497	1663.1
Dennd5a	0.0563397	0.0456826	0.556	0.434	779.629
Hmg20b	0.00450881	0.0456793	0.052	0.014	70.6981
Paqr7	0.0352613	0.0456716	0.313	0.229	510.02
Tmem160	0.0284162	0.0456661	0.243	0.166	416.809
Exoc7	0.00926173	0.0456637	0.144	0.08	142.566
Ergic1	0.177964	0.0456561	0.57	0.48	2027.72
Hsph1	0.27513	0.0456324	0.815	0.714	2562.56
Secisbp2	0.0346833	0.0456236	0.158	0.1	502.04
Slc25a18	0.00133861	0.0455893	0.036	0.003	21.3134
Mvk	0.016834	0.0455345	0.079	0.037	254.058
Tub	0.122871	0.0454652	0.867	0.797	1523.96
Lman2l	0.028453	0.0454564	0.561	0.423	417.234
Add1	0.234366	0.0454462	0.748	0.651	2413.97
Slc4a3	0.0499638	0.0454271	0.408	0.306	700.343
Cramp1l	0.0325573	0.0454069	0.196	0.129	472.537
Kcnmb4	0.0224797	0.0454068	0.162	0.1	334.116
Gm6598	0.0415974	0.0453798	0.101	0.06	593.844
Ak1	0.0773007	0.0453505	0.45	0.357	1033.67
Spata2l	0.00724348	0.0452644	0.09	0.04	112.419
Ptchd4	0.0374011	0.0452643	0.169	0.114	538.651
Ppp6c	0.14453	0.0452578	0.277	0.214	1727.13
Hrh1	0.00722802	0.0452161	0.09	0.04	112.193
Pde10a	0.533778	0.0451918	0.428	0.38	2754.83
9030624J02Rik	0.0869179	0.0451909	0.225	0.169	1146.36
Arhgef7	0.0947394	0.0451879	0.437	0.349	1233.41
Cds2	0.100348	0.0451582	0.901	0.8	1295.89
Rdh12	0.00494001	0.0451238	0.052	0.014	77.3062
Gm10073	0.0882854	0.0451038	0.309	0.237	1161.13
Gad1	0.282486	0.0450888	0.881	0.829	2577.12
Lhpp	0.00984058	0.0450808	0.074	0.031	151.21
Rit1	0.0488432	0.0450649	0.146	0.097	685.906
Vps18	0.139504	0.0450589	0.158	0.117	1677.39
Nefm	0.135446	0.0449867	0.155	0.117	1636.73
Ipo9	0.00617258	0.0449703	0.403	0.274	96.1071
Flot1	0.0378461	0.044968	0.297	0.211	544.643
Sh3d19	0.0711059	0.0449583	0.07	0.04	963.129
Bbs2	0.0464484	0.0449441	0.133	0.086	656.315
Pithd1	0.239129	0.044937	0.525	0.451	2452.99
Nipa1	0.0233352	0.0449092	0.155	0.097	346.318
Plpp7	0.0185977	0.0449005	0.113	0.063	279.263
Gm32014	0.0385036	0.04489	0.068	0.034	553.297
Kctd20	0.200112	0.044838	0.279	0.231	2213.83
Lgalsl	0.0567515	0.0448328	0.297	0.229	784.874
Slc2a3	0.197684	0.0447994	0.498	0.429	2192.71
Arhgap21	0.058983	0.0447869	0.304	0.226	812.845
Edem3	0.040138	0.0447862	0.198	0.137	574.616
Alg1	0.0567881	0.0447851	0.101	0.063	785.266
Tfg	0.0446243	0.0447667	0.248	0.18	633.62
Eml6	0.0618876	0.044747	0.164	0.114	848.913
A830082K12Rik	0.00408147	0.0447223	0.072	0.026	64.071
Gmfb	0.0483899	0.0446838	0.583	0.46	680.217
Reep3	0.0155768	0.0446705	0.099	0.051	235.724
Tmem104	0.112379	0.0446611	0.113	0.077	1414.74
Ap1s3	0.00111349	0.0446599	0.05	0.009	17.7579
Gm29514	0.0369491	0.0446375	0.068	0.034	532.584
Fam160b1	0.03369	0.0445862	0.205	0.137	488.134
Wtap	0.118433	0.0445773	0.471	0.386	1478.16
Casp3	0.0353274	0.0445117	0.191	0.129	510.869
Ptcd1	0.0229522	0.044481	0.077	0.037	340.864
Zfp72	0.00697689	0.0444233	0.099	0.046	108.4
Clcn7	0.0610011	0.0444085	0.277	0.206	838.033
Pmpca	0.118747	0.0443737	0.293	0.226	1481.49
Scamp5	0.341204	0.0443648	0.741	0.646	2875.66
Eif4ebp2	0.0183744	0.0443237	0.261	0.174	276.241
Kcnq1ot1	0.16672	0.0443194	0.932	0.869	1941.45
Scn1a	0.13864	0.0442883	0.331	0.269	1668.25
Spry3	0.00804597	0.0442871	0.101	0.049	124.399
Il6st	0.102263	0.0442826	0.255	0.191	1317.46
AC101921.1	0.0470357	0.0442568	0.054	0.026	662.263
Arap2	0.0104094	0.0442479	0.052	0.017	159.68
Hexa	0.0275226	0.0442061	0.2	0.134	404.445
Ldah	0.0379529	0.0441826	0.248	0.177	546.028
Tmem14a	0.0734486	0.0441648	0.23	0.169	991.042
Ephb6	0.0178406	0.044145	0.144	0.086	268.607
Wdr77	0.0117001	0.0441355	0.387	0.269	178.766
Pafah1b3	0.0832854	0.0441245	0.385	0.3	1104.86
E330009J07Rik	0.0770373	0.0441197	0.176	0.126	1030.3
Rhebl1	0.0244473	0.0440947	0.115	0.066	361.551
Psph	0.00839382	0.044079	0.059	0.02	129.609
Eif4a2	0.0777324	0.0440769	0.998	0.994	1038.5
Hibch	0.0636347	0.0440465	0.151	0.103	870.905
Tdg	0.098764	0.0440353	0.223	0.169	1279.09
Ap1ar	0.110775	0.0440206	0.561	0.451	1411.27
Doc2b	0.0473121	0.043989	0.243	0.177	665.87
Enpp5	0.215538	0.0439758	0.541	0.466	2265.74
Klhl28	0.0270849	0.0439398	0.189	0.123	398.364
Lrrc40	0.109903	0.0439133	0.153	0.114	1402.04
Slc25a51	0.182532	0.0439033	0.642	0.534	2065.53
Stbd1	0.00486564	0.0439017	0.052	0.014	76.1716
Nploc4	0.12059	0.0438921	0.234	0.18	1500.5
Zfhx2os	0.0574591	0.0438451	0.027	0.009	793.51
Lrrc55	0.0938615	0.0438412	0.158	0.114	1223.95
Gramd4	0.0691745	0.043832	0.162	0.114	939.805
Gm15609	0.010163	0.0438305	0.056	0.02	156.002
Sirt2	0.128834	0.0437721	0.354	0.28	1568.95
Lrpap1	0.495099	0.0437475	0.642	0.571	2759.19
D830030K20Rik	0.0355425	0.0437005	0.104	0.06	513.766
Nbeal2	0.0244872	0.0436576	0.083	0.043	362.092
Abcb8	0.0463373	0.0435938	0.171	0.114	654.884
Lhfpl4	0.301964	0.0435567	0.68	0.6	2681.13
Abcc8	0.00766312	0.0434997	0.077	0.031	118.648
Chp1	0.129652	0.0434416	0.736	0.657	1577.73
Aifm2	0.0136441	0.0433807	0.068	0.029	207.404
Tmed3	0.089953	0.0433806	0.329	0.26	1179.19
Noc4l	0.0144741	0.0433741	0.063	0.026	219.558
Commd10	0.0249105	0.0433305	0.14	0.086	368.003
Csrp2	0.13907	0.0432989	0.16	0.12	1673.01
Cthrc1	0.0862889	0.0432886	0.18	0.131	1139.1
Arrb2	0.06639	0.0432615	0.241	0.18	904.762
Golph3l	0.023409	0.0432594	0.149	0.091	347.32
Akap13	0.0516668	0.0432413	0.05	0.023	720.545
Nlk	0.0777081	0.0432268	0.306	0.231	1038.34
Itih5	0.0720521	0.0431997	0.063	0.034	974.072
Nt5dc3	0.0888983	0.0431857	0.331	0.263	1167.41
Gdpd2	0.127856	0.0431462	0.097	0.066	1558.57
Smim26	0.0594831	0.0431363	0.694	0.58	819.023
Zfp940	0.0304807	0.0430977	0.074	0.037	444.195
Smox	0.00130443	0.0430565	0.099	0.037	20.7744
Cacng7	0.0402999	0.0430488	0.221	0.154	576.652
Ifitm10	0.0594641	0.0430088	0.194	0.137	818.821
Hexim1	0.209793	0.0430013	0.205	0.163	2231.15
Ganc	0.0438098	0.0429845	0.074	0.04	622.668
Vat1l	0.981503	0.0429645	0.784	0.777	159.985
Gnai1	0.172115	0.0429171	0.52	0.46	1987.59
Riiad1	0.0492746	0.0428751	0.324	0.234	691.667
Kcna6	0.259662	0.0428734	0.432	0.36	2599.73
Sirpa	0.139854	0.0428669	0.608	0.506	1680.76
Slc35e3	0.151018	0.0428316	0.327	0.266	1790.17
Kctd13	0.0189811	0.042827	0.399	0.291	284.66
Lactb2	0.00650419	0.0428228	0.05	0.014	101.16
Nono	0.20455	0.0428109	0.703	0.617	2251.48
Serinc1	0.0252591	0.0427831	0.984	0.977	372.799
Bend7	0.0223788	0.04277	0.122	0.069	332.66
Clk4	0.0311869	0.0427502	0.374	0.274	453.863
Iqcg	0.0193084	0.0427445	0.061	0.026	289.278
Tyms	0.0377776	0.0426987	0.11	0.066	543.77
Pfdn1	0.127175	0.0426777	0.682	0.586	1551.15
Pnrc1	0.140631	0.0426418	0.318	0.257	1689.26
Rasl10b	0.0987929	0.0425738	0.3	0.231	1279.17
Rsph1	0.0859768	0.0425688	0.086	0.054	1135.5
Rhbdd3	0.0295883	0.0425299	0.086	0.046	431.989
Rasl11b	0.112902	0.042502	0.104	0.069	1418.61
Srsf6	0.16863	0.0424966	0.509	0.417	1956.62
Msi2	0.252847	0.0424795	0.505	0.451	2553.76
Lrrc51	0.0265751	0.0424645	0.036	0.011	391.186
Greb1l	0.0470788	0.0424469	0.198	0.14	662.823
Eif2s1	0.0610427	0.042428	0.178	0.123	838.421
Magee2	0.0383393	0.0424222	0.128	0.08	551.127
Dhdds	0.12439	0.0423737	0.342	0.266	1524.27
Adcyap1r1	0.218902	0.0423518	0.572	0.48	2291.25
Tmed2	0.0788568	0.0423329	0.664	0.543	1051.87
Adk	0.111824	0.0423168	0.151	0.109	1410.32
Ythdc2	0.0421535	0.0422933	0.288	0.211	601.067
Por	0.108224	0.0422905	0.376	0.3	1383.1
Akr1a1	0.207397	0.0422805	0.86	0.814	2275.35
Mbip	0.0663496	0.0422662	0.196	0.14	904.346
Lrch2	0.0814621	0.0422133	0.376	0.291	1083.77
Tpgs1	0.0794423	0.042181	0.252	0.191	1059.05
Dhcr7	0.0194788	0.0421484	0.194	0.123	291.733
Cacna1b	0.252288	0.0421231	0.709	0.594	2549.87
Ramp2	0.00526544	0.0421217	0.056	0.017	82.283
Ryk	0.043719	0.0421216	0.225	0.154	621.509
Rbm14	0.0134525	0.0421205	0.081	0.037	204.626
Ctnnd1	0.0318303	0.0420818	0.101	0.057	462.494
Rprd1b	0.177614	0.0420762	0.288	0.234	2025.33
Tollip	0.14146	0.0420642	0.525	0.429	1697.52
Zdhhc16	0.0207945	0.042058	0.144	0.086	310.379
Adh5	0.0134096	0.0420512	0.144	0.083	204.027
Itga3	0.0192788	0.0420275	0.171	0.106	288.855
Zfp746	0.208258	0.0420228	0.182	0.146	2282.92
Cyp4x1	0.0244737	0.0420067	0.216	0.143	361.917
Mta1	0.164692	0.0419327	0.338	0.277	1922.95
March6	0.0553443	0.0419312	0.773	0.66	767.127
Hint2	0.0387631	0.0418938	0.273	0.191	556.561
Ndufb5	0.239451	0.0418769	0.91	0.811	2455.57
Pigh	0.104504	0.0418716	0.119	0.083	1343.4
Akap10	0.0281813	0.0418646	0.09	0.049	413.56
Coasy	0.0150401	0.0418497	0.099	0.051	227.933
Rin2	0.00769268	0.0418228	0.068	0.026	119.075
Ran	0.114929	0.0417948	0.847	0.734	1441.33
Tti1	0.0217246	0.0417841	0.088	0.046	323.371
Gorasp2	0.0394822	0.0417757	0.421	0.317	566.175
Dhrs7b	0.0406986	0.0417704	0.09	0.051	581.949
Slc41a1	0.015899	0.0417687	0.153	0.091	240.345
Tmem2	0.0591783	0.0417536	0.097	0.06	815.181
Atp6v1b2	0.221829	0.0417485	0.919	0.86	2314.56
Carm1	0.0806734	0.0417108	0.268	0.203	1074.25
Atp6v0e2	0.395067	0.0416459	0.86	0.771	2791.15
Rab3gap2	0.0327112	0.0416415	0.356	0.26	474.672
Tmem231	0.0192475	0.041608	0.176	0.111	288.404
2900093K20Rik	0.0733402	0.0415618	0.207	0.151	989.873
Mrrf	0.0115999	0.0415266	0.158	0.091	177.363
Tapbp	0.0109955	0.0414996	0.18	0.109	168.395
Slc10a3	0.0289182	0.0414923	0.041	0.014	423.478
Ccdc115	0.0279275	0.0414561	0.196	0.129	410.003
Bcan	0.00941624	0.0414467	0.079	0.034	144.878
Grina	0.185913	0.0414463	0.786	0.66	2093.01
Agps	0.0608129	0.0414454	0.223	0.163	835.631
Psma5	0.23631	0.0413837	0.516	0.44	2428.8
Myc	0.0202746	0.0413571	0.043	0.014	303.064
Plch2	0.0350236	0.0413418	0.128	0.08	506.826
Sdk1	0.052439	0.0413386	0.077	0.043	730.056
Npepps	0.39787	0.0413258	0.752	0.657	2798.22
Sptlc1	0.0609878	0.0412659	0.153	0.103	837.911
Esyt3	0.14981	0.0412451	0.155	0.114	1778.99
Ubqln1	0.171702	0.0412398	0.59	0.514	1983.5
Meox2	0.0136307	0.0412386	0.041	0.011	207.213
Mrpl4	0.0827452	0.041215	0.252	0.191	1098.69
Anxa6	0.0861186	0.0412115	0.196	0.143	1137.28
Hspa12a	0.171187	0.0412049	0.419	0.349	1978.58
Wiz	0.135168	0.0412044	0.146	0.106	1634.18
Naga	0.0248196	0.0411938	0.126	0.074	366.709
Slc8a2	0.0552485	0.0411204	0.36	0.277	765.965
E2f5	0.0106257	0.0411142	0.061	0.023	162.914
Bahd1	0.091903	0.0411063	0.074	0.046	1202
Mt2	0.0095747	0.0410785	0.218	0.134	147.259
Atp6v1h	0.252314	0.0410785	0.5	0.426	2549.63
Mrps12	0.279957	0.041077	0.577	0.491	2563.85
2610507B11Rik	0.179732	0.0410575	0.453	0.38	2042.66
Fuk	0.0640437	0.0410371	0.068	0.037	875.99
Capn2	0.25107	0.041022	0.257	0.214	2541.34
2310030G06Rik	0.00707856	0.0410165	0.054	0.017	109.958
Trpv2	0.0737465	0.0409976	0.162	0.114	994.25
Dnaja2	0.165632	0.0409812	0.574	0.471	1931.1
Acsl6	0.147233	0.040964	0.324	0.254	1753.84
Mrps7	0.0106403	0.0409089	0.311	0.206	163.127
Rbms3	0.12062	0.0408927	0.329	0.26	1500.39
Fkbp1b	0.0189547	0.040865	0.185	0.117	284.302
Rtl8b	0.208477	0.0408598	0.811	0.714	2284.7
Ppp2r3a	0.182453	0.0408336	0.248	0.2	2065.55
Pcsk1n	0.13695	0.040809	0.991	0.98	1651.21
Fkbp9	0.0137871	0.0408044	0.045	0.014	209.453
Polr2a	0.0313836	0.0407963	0.399	0.283	456.538
Rundc3a	0.0637528	0.0407637	0.667	0.546	872.393
Faah	0.0546583	0.0407614	0.257	0.183	758.493
Nampt	0.0532773	0.0407557	0.286	0.209	740.608
Pex7	0.185387	0.0407331	0.255	0.203	2090.42
Zfp282	0.0686303	0.0407287	0.097	0.06	933.098
mt-Co3	0.0152481	0.0407034	1	1	230.948
Amy1	0.132402	0.040683	0.221	0.171	1605.9
Ctxn3	0.0676237	0.040682	0.151	0.103	920.292
Fam90a1b	0.0121204	0.0406574	0.025	0.003	185.042
Pqbp1	0.0401215	0.0406299	0.241	0.169	574.419
Msto1	0.0357583	0.0406263	0.128	0.08	516.636
Strada	0.0807055	0.0406257	0.095	0.06	1074.59
D17H6S53E	0.0848205	0.0405952	0.133	0.091	1122.51
Tctn3	0.0339326	0.0405764	0.104	0.06	491.479
Cuedc2	0.108084	0.0405562	0.324	0.251	1381.53
Jakmip1	0.122275	0.0405534	0.556	0.454	1518.05
Eprs	0.160972	0.0405052	0.34	0.274	1885.95
Tspyl3	0.0596532	0.040502	0.43	0.334	821.127
Slc9a5	0.0252751	0.0404911	0.153	0.094	373.01
Gm46430	0.0680696	0.040489	0.086	0.051	926.087
L1cam	0.0560578	0.0404671	0.73	0.64	776.233
Chac2	0.0211375	0.0404634	0.124	0.071	315.267
Zfp937	0.23325	0.0404515	0.115	0.089	2405.28
Arpc1a	0.187899	0.0403972	0.698	0.586	2107.67
Rnf150	0.0605937	0.040392	0.239	0.171	833.103
Fuca1	0.0253972	0.0403918	0.191	0.126	374.659
Elac1	0.196423	0.0403768	0.324	0.266	2181.67
Zkscan2	0.0620235	0.0403748	0.142	0.094	850.591
Gosr1	0.0411479	0.0403489	0.221	0.154	587.963
Lrig2	0.04091	0.0403409	0.268	0.189	584.808
Pomk	0.0388916	0.0403315	0.189	0.126	558.25
Rilpl1	0.0310151	0.0403302	0.153	0.097	451.425
Sec23a	0.108303	0.0402986	0.509	0.403	1384
Keap1	0.22645	0.0402974	0.45	0.374	2351.69
Fstl4	0.0103004	0.0402919	0.047	0.014	158.049
Atp6ap1l	0.0212584	0.0402819	0.043	0.014	316.984
Lrrc24	0.0234794	0.0402401	0.124	0.071	348.271
Amigo2	0.454657	0.0402031	0.234	0.211	2793.41
Tsnax	0.126147	0.0402017	0.601	0.494	1540.76
Gm17435	0.00807679	0.0401924	0.038	0.009	124.859
Cox7a1	0.0101809	0.0401835	0.047	0.014	156.267
Bcl2l2	0.138961	0.040169	0.354	0.289	1671.98
C130060K24Rik	0.0142697	0.0401226	0.045	0.014	216.529
Dhtkd1	0.0284273	0.0401193	0.079	0.04	416.915
Dynlt1a	0.212693	0.0401088	0.241	0.194	2245.61
Hltf	0.029804	0.0401009	0.187	0.126	434.841
Dag1	0.0298772	0.0400963	0.374	0.269	435.848
Rhob	0.274986	0.0400954	0.538	0.477	2561.77
Pofut1	0.0160091	0.0400871	0.162	0.097	241.93
Zfp426	0.0277783	0.0400696	0.182	0.12	407.98
Atad5	0.00716646	0.040033	0.09	0.04	111.252
Cdk8	0.11971	0.0400228	0.239	0.183	1491.94
Rab9b	0.12851	0.0399847	0.757	0.629	1565.63
Parm1	0.0387256	0.039962	0.209	0.146	556.099
H1fx	0.0952253	0.0399599	0.27	0.206	1238.98
Arf1	0.221151	0.0399537	0.878	0.831	2308.6
Klf16	0.0287741	0.0399464	0.151	0.094	421.626
Nfkbib	0.0531233	0.0399388	0.113	0.071	738.84
Mtmr4	0.0787791	0.039891	0.421	0.326	1050.99
Aip	0.0332234	0.0398686	0.586	0.46	481.806
C78859	0.00969536	0.0398443	0.182	0.109	149.056
Lyrm7	0.0095963	0.0397392	0.083	0.037	147.562
Crhr1	0.07778	0.0397216	0.065	0.037	1038.98
Arhgap26	0.203707	0.0396809	0.43	0.366	2244.85
Gm29543	0.0279156	0.039667	0.05	0.02	409.857
Toe1	0.0180972	0.0396655	0.074	0.034	272.272
Churc1	0.0700565	0.0395903	0.514	0.411	950.667
Gm12258	0.0372383	0.0395777	0.146	0.094	536.529
5430416N02Rik	0.0806127	0.0395722	0.119	0.08	1073.68
Rap2c	0.0272084	0.0395709	0.209	0.14	400.154
Cep83	0.0579195	0.0395624	0.16	0.109	799.347
Ahr	0.0350565	0.0395538	0.099	0.057	507.233
Rsl1d1	0.114375	0.0395221	0.376	0.303	1435.18
Fam107b	0.0213175	0.0395123	0.043	0.014	317.716
Fam222a	0.0379826	0.0395043	0.133	0.083	546.417
Lmo3	0.104552	0.0395008	0.092	0.06	1343.91
Zfp60	0.0826947	0.039493	0.236	0.174	1098.19
Echdc2	0.00899367	0.0394718	0.063	0.023	138.53
Ccdc85a	0.0774072	0.039468	0.288	0.214	1034.93
Prpf18	0.0511832	0.0394221	0.349	0.26	714.262
Npdc1	0.137671	0.0394145	0.718	0.637	1659.22
Dleu7	0.142931	0.0394101	0.167	0.126	1711.6
Nov	0.00126036	0.0394048	0.029	0	20.0789
Fkrp	0.0871606	0.0393844	0.313	0.237	1148.78
Tnr	0.245699	0.0393818	0.225	0.189	2502.44
H2-K1	0.0227083	0.0393811	0.027	0.006	337.445
Mpdu1	0.0996393	0.0393754	0.232	0.177	1288.64
Parn	0.0421607	0.0393562	0.259	0.18	601.127
C920021L13Rik	0.00346696	0.0393282	0.054	0.014	54.5803
Dclk2	0.0485657	0.0393216	0.2	0.14	682.396
Sdf2	0.190238	0.0393017	0.507	0.423	2126.48
Grb14	0.03131	0.0392922	0.108	0.063	455.561
Sdc3	0.132146	0.0392912	0.563	0.466	1603.32
Manbal	0.144571	0.0392901	0.315	0.243	1727.48
Hcn3	0.0318197	0.0392597	0.279	0.194	462.403
Agl	0.387066	0.0392466	0.313	0.26	2770.23
Pgrmc2	0.144693	0.0392331	0.608	0.52	1728.8
Kcnip4	0.0517451	0.0392323	0.236	0.171	721.534
Ganab	0.246032	0.0391941	0.426	0.366	2505.34
Abhd3	0.0783229	0.0391806	0.065	0.037	1045.69
Atg9a	0.0558128	0.0391429	0.383	0.289	773.174
Plbd2	0.0764474	0.0391281	0.295	0.223	1023.32
Pno1	0.0436026	0.0391275	0.124	0.077	619.986
Tmem91	0.118969	0.0391205	0.752	0.64	1484.01
Mog	0.00552947	0.0390933	0.041	0.009	86.2874
Ctu1	0.0564789	0.0390915	0.11	0.069	781.442
Cadm3	0.274899	0.0390686	0.716	0.62	2561.78
A330041J22Rik	0.0323844	0.0390324	0.065	0.031	470.189
Mapk15	0.0610156	0.0390253	0.095	0.057	838.171
Hyal2	0.0191269	0.0390201	0.07	0.031	286.635
Neu1	0.0399491	0.0389827	0.288	0.206	572.23
Inip	0.0395706	0.0389409	0.068	0.034	567.284
Phyh	0.0783393	0.0389369	0.243	0.177	1045.83
Arf4	0.0644244	0.0389356	0.646	0.514	880.488
Calb1	0.0307914	0.0389126	0.369	0.274	448.507
Nipal2	0.0855871	0.0389111	0.178	0.129	1131.29
Mical1	0.0136725	0.0389016	0.041	0.011	207.767
Osbpl11	0.0737083	0.0388829	0.117	0.077	993.882
Tk2	0.0948523	0.0388728	0.295	0.22	1234.69
Nup62cl	0.0187792	0.0388715	0.023	0.003	281.876
Wdr1	0.16689	0.0388662	0.559	0.454	1942.6
Metap1	0.0288608	0.038834	0.385	0.274	422.724
Nck2	0.0937194	0.0388336	0.092	0.06	1222.57
Gfod2	0.108925	0.0388242	0.223	0.169	1391.08
Sparc	0.0252302	0.0388197	0.095	0.051	372.449
Egr2	0.00671715	0.0388156	0.045	0.011	104.418
Zcchc12	0.156537	0.0388111	0.98	0.98	1843.07
Pigg	0.0513107	0.0388088	0.081	0.046	715.938
Sall1	0.00672083	0.0388004	0.034	0.006	104.469
Tmem63b	0.0485638	0.0387943	0.491	0.383	682.418
Dpy19l4	0.139164	0.0387444	0.347	0.277	1673.72
Ctif	0.108615	0.0387161	0.446	0.354	1387.56
Gch1	0.0274666	0.0386934	0.054	0.023	403.677
Med13	0.11052	0.0386918	0.293	0.226	1408.57
Rab9	0.0711534	0.0386863	0.279	0.206	963.63
Pcyt1a	0.0239016	0.0386736	0.16	0.1	354.055
Cd164	0.133241	0.0386644	0.385	0.311	1614.22
Strip1	0.157067	0.038656	0.3	0.234	1846.95
Insig2	0.0150084	0.0386428	0.448	0.326	227.498
Irak2	0.00993084	0.0386061	0.052	0.017	152.518
Pigu	0.0330301	0.0385734	0.16	0.103	479.168
Noa1	0.0519505	0.0385532	0.122	0.077	723.982
Gm15631	0.0545485	0.0385423	0.088	0.051	757.133
Asb7	0.0852662	0.0385388	0.261	0.197	1127.73
Bet1	0.109599	0.0385361	0.196	0.146	1398.49
Ddc	0.0421234	0.0385085	0.209	0.146	600.679
Tns3	0.00632352	0.0384557	0.045	0.011	98.4256
Hes5	0.0108473	0.0384492	0.074	0.031	166.191
Phkb	0.0506105	0.0384466	0.164	0.109	708.749
Gm19531	0.0273641	0.0384331	0.079	0.04	402.253
Gpr88	0.0322617	0.0384193	0.119	0.071	468.472
Prkd2	0.0089852	0.0383959	0.043	0.011	138.408
Zfp383	0.07211	0.0383922	0.158	0.109	974.711
Hist1h1c	0.0105377	0.0383743	0.099	0.049	161.617
Nudt12	0.00531093	0.0383399	0.056	0.017	82.9621
Vrk3	0.0281723	0.0383195	0.106	0.06	413.484
Plgrkt	0.0850337	0.0383181	0.2	0.149	1125.08
Epn2	0.144229	0.0382919	0.322	0.254	1724.55
Ifngr2	0.0497599	0.0382805	0.275	0.2	697.833
Inha	0.0527096	0.0382742	0.194	0.137	733.56
Mrps18a	0.096341	0.0382386	0.45	0.357	1251.28
Stim2	0.0788968	0.0382381	0.264	0.197	1052.33
Car11	0.0724614	0.0381545	0.212	0.154	978.954
Dnm1	0.561459	0.0381479	0.696	0.634	2765.19
Synj1	0.184368	0.0381454	0.917	0.86	2080.78
Llgl1	0.0670159	0.0381219	0.086	0.051	912.824
Golga7	0.0456001	0.0381025	0.392	0.291	645.926
Pex5	0.0393321	0.0380979	0.205	0.143	564.219
Slc6a8	0.0563166	0.0380968	0.099	0.06	779.365
Cdkn2aip	0.0216034	0.0380934	0.218	0.143	321.696
Kdelc1	0.00670217	0.0380702	0.05	0.014	104.192
Zfyve1	0.00861991	0.0380536	0.097	0.046	132.953
Etv5	0.0846844	0.0379863	0.054	0.029	1120.88
Gm21781	0.0522144	0.0379572	0.041	0.017	727.399
Thrap3	0.0507381	0.0379459	0.509	0.391	710.079
Fbxl4	0.0888145	0.0379437	0.144	0.1	1166.67
Fam53a	0.0273351	0.037933	0.182	0.117	401.907
Ubxn8	0.0146793	0.0379132	0.101	0.051	222.582
Hist1h2ac	0.0126726	0.0379083	0.036	0.009	193.168
Fam81a	0.0501696	0.0378814	0.284	0.209	702.926
Cacna2d1	0.0246816	0.0378727	0.428	0.311	364.819
Ebf4	0.0901121	0.0378699	0.144	0.103	1181.01
Brdt	0.0518779	0.0378525	0.185	0.126	723.074
Artn	0.057113	0.0378284	0.027	0.009	789.244
Ctdnep1	0.211518	0.0378248	0.279	0.229	2238.7
Hccs	0.01454	0.0378146	0.236	0.154	220.542
Gm21814	0.0277246	0.0378075	0.045	0.017	407.275
Fscn1	0.0965923	0.0377837	0.275	0.211	1254.25
Ppfia1	0.0325004	0.0377832	0.218	0.149	471.743
E530011L22Rik	0.0402327	0.0377732	0.072	0.037	575.931
Rpl22l1	0.0558915	0.0377665	1	1	774.042
Unc5c	0.0423392	0.0377039	0.381	0.283	603.418
Tmem50b	0.152151	0.0376867	0.493	0.386	1801.01
Mlec	0.435848	0.037662	0.561	0.477	2817.32
Edc4	0.0180608	0.0376444	0.214	0.137	271.761
Bdp1	0.122261	0.0376377	0.297	0.229	1518.12
Rfc2	0.111532	0.0376229	0.291	0.226	1407.98
Zfp516	0.03572	0.0375882	0.081	0.043	516.119
Zfp174	0.0281808	0.0375852	0.054	0.023	413.582
Tomm34	0.108426	0.037572	0.392	0.309	1385.46
Uso1	0.0531422	0.0375698	0.432	0.334	739.049
Drg2	0.0654092	0.0375682	0.182	0.126	892.639
Minos1	0.388612	0.0375287	0.829	0.754	2773.13
D630045J12Rik	0.0355309	0.0374817	0.135	0.083	513.635
Neat1	0.00821231	0.0374736	0.068	0.026	126.872
Scg3	0.227597	0.0374727	0.574	0.486	2361.1
Mrps21	0.045459	0.0374603	0.545	0.429	644.199
Ldhd	0.0155531	0.037454	0.104	0.054	235.397
Usp27x	0.138209	0.0374304	0.385	0.314	1664.31
Nrn1l	0.0037012	0.0374223	0.043	0.009	58.1939
Mcee	0.144453	0.0374058	0.309	0.24	1726.79
Litaf	0.00295882	0.0374043	0.038	0.006	46.705
Hipk1	0.0759739	0.0373653	0.527	0.411	1017.67
Map4k1	0.0373682	0.0373486	0.052	0.023	538.251
Sdccag8	0.0243542	0.0373485	0.155	0.094	360.247
Mak16	0.168454	0.0373229	0.23	0.18	1955.25
Tgoln1	0.0952198	0.0373087	0.921	0.84	1239
Cttnbp2nl	0.0618519	0.0372961	0.09	0.054	848.485
Txndc15	0.134878	0.0372846	0.421	0.346	1631.35
Gpt2	0.0992845	0.0372737	0.097	0.063	1284.64
Tecpr2	0.0617524	0.037264	0.291	0.217	847.244
Tmem132d	0.0686597	0.0372598	0.074	0.043	933.428
Slc35d1	0.119381	0.0372376	0.083	0.054	1488.56
Cacna1g	0.159872	0.0372348	0.248	0.2	1875.78
Efl1	0.0406111	0.0372278	0.088	0.049	580.738
Kmt5b	0.0343504	0.037207	0.324	0.234	497.394
Fam149b	0.221385	0.0371816	0.223	0.18	2310.59
Spata6	0.0397816	0.0371633	0.047	0.02	570.031
Lrrc47	0.158375	0.037145	0.313	0.249	1860.12
Cdk18	0.125373	0.0371235	0.338	0.271	1533.56
Ube2j1	0.144908	0.0371109	0.516	0.409	1731.07
Fbxo34	0.0858703	0.0370968	0.131	0.089	1134.35
Carmil2	0.0153668	0.0370371	0.322	0.22	232.715
Tacc2	0.292714	0.037003	0.457	0.394	2637.06
Vps41	0.257068	0.036995	0.428	0.366	2583.27
Tmem179	0.209938	0.0369833	0.784	0.689	2232.27
Yeats2	0.246719	0.0369497	0.324	0.271	2510.37
Mal	0.0238393	0.0369493	0.092	0.049	353.251
Chd2	0.0873008	0.0369485	0.392	0.297	1150.19
Thbs3	0.025627	0.0369428	0.16	0.1	377.845
Ubr7	0.0405008	0.0369428	0.212	0.146	579.242
Zdhhc22	0.0114107	0.0369194	0.383	0.269	174.584
Htr1f	0.00305088	0.0368551	0.025	0	48.1459
Slc48a1	0.146052	0.0368344	0.408	0.323	1742.4
Pcdhb18	0.0150313	0.0368314	0.063	0.026	227.83
Nckap5l	0.0719008	0.0368227	0.07	0.04	972.099
Dtna	0.103181	0.0367824	0.455	0.36	1328.46
Dpysl5	0.227032	0.036777	0.394	0.326	2356.14
Cap2	0.105296	0.0367504	0.376	0.294	1351.06
Klf10	0.0135371	0.0367391	0.081	0.037	205.858
Mrps18b	0.0098347	0.0367229	0.135	0.074	151.13
Unc5b	0.041519	0.0367213	0.043	0.017	592.892
Abcc10	0.0195801	0.036716	0.081	0.04	293.172
Gla	0.014229	0.0366745	0.045	0.014	215.939
Hs3st2	0.0759276	0.0366516	0.038	0.017	1017.35
BC017158	0.0273439	0.0366489	0.135	0.08	401.982
Tecpr1	0.121872	0.0366098	0.543	0.44	1513.9
Dlx6os1	0.0455932	0.0365767	0.146	0.094	645.873
Chst10	0.0968672	0.0365439	0.36	0.274	1257.34
Alkbh7	0.0870148	0.0365362	0.169	0.12	1147.12
Pdzd11	0.0247753	0.0365359	0.135	0.08	366.104
Slc7a5	0.12985	0.036535	0.149	0.106	1579.89
Glud1	0.178994	0.0365346	0.583	0.48	2036.42
Ttpal	0.109968	0.036534	0.212	0.16	1402.53
Astn1	0.247378	0.0365316	0.858	0.789	2514.35
Creg1	0.0836004	0.0365242	0.149	0.103	1108.46
Pcgf3	0.0460804	0.0365019	0.349	0.257	652.038
Tti2	0.0359667	0.0364822	0.115	0.069	519.468
Ngly1	0.0329558	0.0364362	0.115	0.069	478.122
Desi1	0.0638434	0.0364335	0.311	0.234	873.441
Med10	0.0749588	0.0364235	0.297	0.223	1009.32
Ubap1	0.0835288	0.0364172	0.169	0.12	1107.68
Qrich1	0.0615188	0.0364051	0.376	0.289	844.469
Pigt	0.101083	0.0363803	0.286	0.22	1304.27
Gm26901	0.113821	0.0363585	0.047	0.026	1428.68
Rhbdd1	0.00761692	0.0363447	0.054	0.017	117.948
Slc7a6	0.0285951	0.0363199	0.126	0.074	419.204
Fig4	0.0276267	0.0363104	0.079	0.04	405.946
Ercc2	0.0484183	0.0363083	0.108	0.066	680.519
Cdc123	0.293915	0.0362967	0.372	0.314	2642
[truncated: 14,360 more rows]

## Sheet: VgatEsr1P50FvsP23F
	p_val	avg_logFC	pct.1	pct.2	p_val_adjust
Socs2	1.14598e-23	0.530366	0.475	0.089	1.82188e-19
Rps12	2.48924e-38	0.514114	1	0.972	3.96188e-34
mt-Nd3	5.41503e-29	0.473443	0.996	0.873	8.61532e-25
Tmem35a	1.02979e-13	0.473378	0.607	0.282	1.63324e-09
Meg3	1.35372e-26	0.430662	1	1	2.15309e-22
Rps10	7.91276e-30	0.428314	1	0.962	1.259e-25
Parm1	1.99475e-15	0.425263	0.451	0.136	3.16627e-11
Nts	5.47477e-06	0.421056	0.401	0.218	0.0853516
Pdzrn4	5.29731e-17	0.416298	0.79	0.377	8.41212e-13
Rps15	2.72817e-34	0.406004	1	0.997	4.34161e-30
Nrip1	2.31037e-15	0.404639	0.467	0.152	3.66702e-11
Rpl5	3.55771e-20	0.399293	0.996	0.845	5.65285e-16
Rps20	1.51205e-25	0.387262	1	0.972	2.40477e-21
Rps8	2.92529e-43	0.373065	1	1	4.65619e-39
Paip1	8.28427e-12	0.364288	0.658	0.32	1.31264e-07
Rpl8	1.01573e-27	0.359618	1	0.997	1.61582e-23
Prkce	7.12955e-11	0.357404	0.778	0.481	1.12904e-06
Wdr89	1.27829e-15	0.354523	0.747	0.32	2.02915e-11
Gm26699	8.76208e-17	0.352045	0.588	0.193	1.39133e-12
Rps24	1.04508e-30	0.350532	1	1	1.66303e-26
Rpl19	1.7998e-30	0.347027	1	1	2.86384e-26
Rpl30	3.48559e-22	0.343746	1	0.978	5.54e-18
Rpsa	7.96216e-19	0.343473	1	0.949	1.26487e-14
Fgfr1	2.53026e-05	0.342074	0.693	0.487	0.391229
Eef1a1	9.72316e-27	0.340206	1	1	1.54657e-22
Hmgcs1	3.35049e-10	0.334833	0.751	0.411	5.30013e-06
Cartpt	5.35061e-06	0.334534	0.167	0.051	0.083432
Tcp1	4.45281e-13	0.333874	0.879	0.513	7.05993e-09
Rps27rt	3.34858e-14	0.333079	0.969	0.797	5.31184e-10
Atp1b3	9.57753e-09	0.329823	0.728	0.449	0.000151114
Rpl22l1	1.55646e-28	0.327476	1	1	2.47618e-24
Enah	2.81112e-07	0.325424	0.907	0.687	0.00441992
Scg2	1.2532e-12	0.324884	1	0.978	1.98632e-08
Msi2	2.89513e-10	0.322033	0.712	0.38	4.58068e-06
Sccpdh	3.92903e-11	0.321576	0.732	0.389	6.22359e-07
Prune2	9.59129e-10	0.319812	0.661	0.358	1.51629e-05
Bhlhe41	1.36209e-08	0.318159	0.494	0.244	0.000214829
Rplp1	1.81046e-22	0.314098	1	0.997	2.87773e-18
Rpl7	7.88453e-15	0.306527	1	0.921	1.25112e-10
Rps11	1.80594e-22	0.305911	1	0.997	2.87072e-18
Cbx3	1.24376e-05	0.305209	0.829	0.665	0.193144
Eef2	4.32602e-12	0.302995	0.973	0.797	6.85545e-08
Lrp1b	1.32524e-10	0.302144	0.953	0.684	2.09786e-06
Elavl4	1.17251e-08	0.300914	0.918	0.737	0.000184963
Zscan26	8.66387e-09	0.298499	0.568	0.288	0.000136716
Rpl12	5.00617e-15	0.297498	1	0.953	7.9448e-11
Nexmif	4.02753e-08	0.295553	0.584	0.31	0.000634698
Rpl23a	3.52066e-22	0.294318	1	1	5.59539e-18
Rpl4	1.3299e-17	0.291689	1	0.984	2.11214e-13
Kdelr2	8.96329e-10	0.291046	0.432	0.18	1.41728e-05
Marf1	1.48021e-09	0.289897	0.696	0.383	2.33933e-05
Pgr	1.28028e-09	0.28719	0.786	0.456	2.0236e-05
Nop56	6.60268e-09	0.287093	0.813	0.487	0.000104243
Rpl21	2.65797e-24	0.284154	1	1	4.22644e-20
Apba1	1.42645e-13	0.284052	0.397	0.111	2.26207e-09
Rps3a1	1.3407e-22	0.281978	1	1	2.13131e-18
Rps25	4.38903e-20	0.280481	1	0.997	6.97329e-16
Rpl26	4.10282e-24	0.275132	1	1	6.52348e-20
Gas7	4.13055e-08	0.274839	0.728	0.44	0.000650851
Serpini1	1.13553e-09	0.272427	0.576	0.275	1.79492e-05
Neto2	3.41594e-08	0.271243	0.362	0.152	0.00053842
Elmo1	5.77221e-08	0.271155	0.716	0.453	0.000909353
Lrrtm2	1.90561e-10	0.271044	0.506	0.209	3.01601e-06
Phyhipl	4.57821e-10	0.269321	0.665	0.342	7.2409e-06
Eef1b2	2.86157e-10	0.267969	0.965	0.82	4.52787e-06
Rpl9	8.48566e-25	0.267313	1	1	1.34939e-20
Rpl3	5.51007e-18	0.266015	1	0.997	8.75165e-14
Rplp2	2.56936e-16	0.264385	1	1	4.07886e-12
Rpl27a	6.98819e-20	0.262748	1	1	1.11021e-15
Rpl18	3.07252e-10	0.262457	0.988	0.88	4.86103e-06
Unc5d	1.80191e-06	0.260965	0.813	0.592	0.0282124
Rpl23	2.49453e-18	0.260947	1	1	3.96232e-14
Eef1g	2.17263e-14	0.260446	1	0.987	3.44666e-10
Rps27a	5.08577e-21	0.26006	1	0.997	8.0818e-17
Arhgef9	5.31265e-09	0.259201	0.833	0.554	8.39026e-05
Gnb1	0.000516114	0.259002	0.926	0.867	7.68649
Nrxn3	9.83335e-14	0.258421	1	0.978	1.55967e-09
Hspa8	1.0357e-09	0.257042	0.992	0.94	1.63724e-05
Kpnb1	9.41439e-10	0.255868	0.72	0.364	1.48841e-05
Rpl17	4.98067e-22	0.255364	1	1	7.91528e-18
Rbbp7	5.53873e-07	0.253998	0.584	0.332	0.00869913
Tmem158	4.41847e-07	0.252863	0.903	0.649	0.00694231
Unc80	1.88271e-09	0.252512	0.946	0.703	2.97525e-05
Inpp4a	3.65202e-06	0.251897	0.681	0.418	0.057019
Maged1	8.10281e-09	0.251445	0.977	0.839	0.00012787
Rpl14	1.39335e-16	0.25072	1	1	2.21223e-12
Insig1	1.14632e-08	0.249644	0.354	0.133	0.000180855
Rps21	1.29335e-16	0.248381	1	0.994	2.05358e-12
Rps5	6.52206e-14	0.248048	1	1	1.03453e-09
Fhad1	3.96014e-11	0.246566	0.471	0.171	6.27246e-07
Ptpn5	5.45755e-06	0.246509	0.735	0.468	0.0850886
Actb	0.458992	0.245545	0.988	0.981	1824.49
Cadm1	6.00125e-09	0.245303	0.984	0.867	9.47658e-05
Mmd	4.62592e-07	0.245007	0.735	0.465	0.00726686
Rps17	1.05373e-13	0.244904	0.996	0.984	1.67111e-09
Maf	5.51874e-09	0.244668	0.342	0.123	8.71519e-05
Sv2c	1.25493e-06	0.241077	0.521	0.285	0.0196736
Tpt1	1.79345e-10	0.240585	0.984	0.892	2.83867e-06
9930021J03Rik	8.28718e-11	0.236432	0.514	0.206	1.31228e-06
Itm2c	5.68922e-11	0.236116	0.996	0.972	9.01059e-07
Cacna2d1	2.83749e-06	0.234796	0.459	0.241	0.0443415
Rps3	3.07501e-15	0.234569	1	0.997	4.88034e-11
Dnm3	6.13938e-07	0.234508	0.833	0.589	0.00964005
Msmo1	3.8487e-09	0.23375	0.529	0.244	6.07979e-05
Spon1	6.76772e-05	0.232295	0.245	0.111	1.03742
Chpt1	9.41965e-08	0.232136	0.451	0.212	0.00148284
Tsr2	6.58758e-08	0.231736	0.681	0.367	0.00103768
Rps14	8.98426e-15	0.23154	1	1	1.42553e-10
Pdcd4	0.000466659	0.229429	0.875	0.677	6.96489
Scd2	8.85832e-06	0.229061	0.907	0.715	0.137809
Olfm3	1.44595e-06	0.228556	0.693	0.43	0.0226566
Pcnp	3.20319e-08	0.228348	0.961	0.785	0.00050495
Pard3	7.75978e-09	0.228343	0.432	0.18	0.000122473
Stk19	9.98981e-07	0.226549	0.584	0.316	0.015671
Chmp3	6.92282e-11	0.2264	0.685	0.307	1.09637e-06
Spock3	0.000493897	0.226134	0.654	0.478	7.36253
Lrrc58	2.31792e-07	0.22342	0.732	0.446	0.00364516
Mcfd2	3.9191e-08	0.221991	0.584	0.301	0.00061765
Tmcc3	4.37533e-07	0.22124	0.879	0.652	0.00687495
Chl1	1.63256e-05	0.220944	0.778	0.579	0.25321
Fstl5	2.03409e-07	0.219057	0.829	0.541	0.00319983
Pcdh7	2.80083e-06	0.21844	0.891	0.741	0.0437742
Neo1	4.95526e-05	0.217964	0.502	0.294	0.76207
Rps23	5.61697e-13	0.217233	1	1	8.90458e-09
H2-Q2	9.62968e-07	0.217093	0.253	0.092	0.015108
Rps16	1.91123e-14	0.216766	1	1	3.03217e-10
Rpl32	2.48766e-13	0.216532	1	1	3.94469e-09
Kif5b	6.05598e-05	0.215719	0.911	0.665	0.92929
Rpl11	1.09693e-11	0.213499	1	1	1.73786e-07
Zbtb20	5.2542e-05	0.21243	0.965	0.883	0.807623
Hcn1	1.23892e-06	0.212401	0.553	0.301	0.0194238
Pcdh15	1.82399e-06	0.212122	0.482	0.256	0.0285545
Rtraf	5.78601e-07	0.209952	0.899	0.633	0.00908576
Rpl13	1.85957e-16	0.209115	1	1	2.95225e-12
Rpl34	2.39925e-12	0.208221	1	0.997	3.80233e-08
Rps15a	1.3388e-12	0.207235	1	1	2.12187e-08
Pcp4	1.39048e-06	0.207222	1	0.972	0.0217902
Spop	1.68289e-05	0.207164	0.794	0.566	0.260965
Smc5	1.17096e-08	0.206928	0.455	0.19	0.000184731
Ngb	9.01819e-09	0.206646	0.685	0.37	0.000142298
Fau	1.16871e-10	0.206345	1	0.994	1.85029e-06
Rps6	4.79066e-12	0.205643	1	1	7.59128e-08
Gkap1	2.15423e-06	0.203715	0.545	0.288	0.0336986
Phlda1	3.20299e-05	0.203348	0.268	0.123	0.494478
Arid4a	4.14914e-07	0.203014	0.778	0.465	0.00651996
Ptp4a1	3.38439e-06	0.202897	0.883	0.652	0.0528507
Nrp1	4.3158e-09	0.202293	0.358	0.127	6.81724e-05
1500009L16Rik	1.88332e-06	0.202104	0.767	0.494	0.0294814
Wnk1	7.6055e-08	0.201895	0.673	0.364	0.00119756
Nos1	1.88151e-05	0.200877	0.459	0.256	0.291596
Pfdn5	2.56066e-09	0.200483	1	0.984	4.04584e-05
Rpl10a	7.94567e-09	0.199211	1	0.953	0.000125399
Rps19	1.07305e-14	0.198892	1	1	1.7025e-10
Ralgps2	6.6343e-05	0.197966	0.541	0.32	1.01724
Snhg12	8.10442e-06	0.197042	0.817	0.538	0.126137
Sez6l	2.9343e-05	0.196239	0.934	0.759	0.45332
Sytl4	1.17963e-06	0.194955	0.089	0.006	0.0184978
A730046J19Rik	4.80003e-09	0.193617	0.113	0.003	7.58117e-05
Zfp622	1.72288e-07	0.192451	0.63	0.313	0.00271061
Rps6ka3	2.98132e-09	0.188592	0.23	0.054	4.71018e-05
Tnxb	1.33923e-11	0.188392	0.179	0.016	2.12162e-07
Lingo2	4.8254e-06	0.187977	0.7	0.43	0.0752618
Rpl35a	4.91113e-13	0.187248	1	1	7.7861e-09
Ssr1	3.24051e-06	0.187215	0.918	0.69	0.050607
Map2k1	2.48891e-05	0.187098	0.809	0.63	0.384935
Csrnp3	7.12183e-05	0.187048	0.669	0.462	1.09114
Il1rap	1.67997e-06	0.186288	0.393	0.177	0.0263066
Smim26	2.83857e-05	0.18605	0.716	0.475	0.438644
Tmem263	3.78275e-07	0.185689	0.471	0.218	0.00594497
Chst11	3.03568e-07	0.183099	0.374	0.161	0.00477239
Lpp	9.32209e-10	0.181799	0.315	0.095	1.47392e-05
Trim2	8.64324e-05	0.181617	0.872	0.655	1.32147
Cox7a2l	6.35166e-06	0.181506	0.992	0.918	0.0989715
Cdv3	1.13486e-06	0.181216	0.708	0.408	0.0177969
Rps4x	8.44211e-10	0.180884	1	1	1.33495e-05
mt-Nd2	2.36143e-10	0.180627	1	0.994	3.73697e-06
Slc24a5	3.36451e-05	0.18041	0.626	0.373	0.519077
Rpl31	7.19541e-09	0.180306	1	0.997	0.00011358
Rpl9-ps6	4.6674e-06	0.180256	0.498	0.263	0.0728161
Ndufs1	2.27763e-07	0.180162	0.416	0.184	0.00358226
Mindy2	7.08007e-07	0.179877	0.568	0.294	0.011115
Rpl24	1.17655e-10	0.179005	1	1	1.86259e-06
Mical2	1.4813e-07	0.178782	0.315	0.117	0.00233113
Rpgrip1	4.48676e-05	0.178706	0.51	0.291	0.690602
Rps2	1.34092e-08	0.178562	1	0.987	0.000211503
Npm1	1.06983e-07	0.178265	0.988	0.905	0.00168391
Rap1gap	0.00037508	0.178166	0.759	0.535	5.61832
Idnk	5.62983e-06	0.177646	0.467	0.237	0.0877522
Otub1	0.00710182	0.177382	0.646	0.5	95.9669
Hmgcr	2.05303e-05	0.176432	0.568	0.329	0.317993
Dpy19l1	4.53055e-06	0.176249	0.331	0.152	0.0706902
Esr1	2.91182e-06	0.175976	0.887	0.687	0.0455001
M6pr	6.82593e-08	0.175216	0.588	0.278	0.00107515
Nxn	2.40542e-09	0.175178	0.187	0.032	3.80081e-05
Cap2	7.91554e-07	0.175109	0.467	0.234	0.0124234
Ly6e	5.99816e-05	0.174708	0.7	0.449	0.920537
Endod1	7.24433e-06	0.172996	0.502	0.269	0.112809
Zfp512	2.01892e-06	0.172502	0.623	0.345	0.0315961
mt-Co2	6.67765e-13	0.172047	1	1	1.05854e-08
Tcf4	0.000847035	0.171036	0.564	0.361	12.4489
Rasd1	2.10522e-06	0.170813	0.148	0.035	0.0329361
Grik1	6.53251e-06	0.170559	0.366	0.18	0.101763
Naaa	1.59459e-06	0.170262	0.377	0.168	0.024976
Rack1	2.20434e-05	0.170238	0.899	0.671	0.341277
Nudc	5.79654e-06	0.170161	0.817	0.519	0.0903449
Psmc5	0.000651253	0.17004	0.724	0.513	9.6418
Eml2	3.75758e-06	0.168762	0.638	0.354	0.0586633
Pmepa1	1.66022e-06	0.168002	0.276	0.108	0.0260007
Mpc2	4.7255e-07	0.167857	0.447	0.203	0.00742234
Dlgap1	1.15784e-05	0.1675	0.529	0.297	0.179929
2010005H15Rik	1.12757e-06	0.167302	0.401	0.18	0.0176837
Pfdn2	1.15406e-05	0.167161	0.992	0.886	0.179353
Timm9	9.4283e-05	0.167152	0.77	0.513	1.44008
Srsf5	1.91985e-05	0.166967	0.907	0.718	0.2975
Hprt	3.69649e-05	0.166825	0.782	0.522	0.569888
Pcmtd1	2.22526e-05	0.166338	0.611	0.348	0.34447
Atp13a3	7.59702e-07	0.166059	0.389	0.174	0.011925
Zfp941	1.53802e-06	0.165742	0.475	0.228	0.0240947
Vps33a	7.34876e-09	0.164708	0.257	0.07	0.000115993
Crtac1	1.04657e-06	0.164545	0.276	0.104	0.0164155
Srrm1	0.000134308	0.164444	0.833	0.598	2.04337
Hook3	1.38754e-05	0.163801	0.708	0.446	0.215347
Flrt2	1.22737e-06	0.163139	0.323	0.133	0.0192439
Fam46a	0.000233421	0.163134	0.486	0.291	3.52653
Emc10	9.17652e-05	0.162672	0.755	0.494	1.40181
Pitpnm3	5.92457e-08	0.162638	0.381	0.146	0.000933298
Usp4	4.43888e-07	0.16247	0.455	0.215	0.00697392
Gtf3c6	1.20611e-08	0.16192	0.28	0.085	0.000190251
Dlg1	1.54033e-06	0.160102	0.529	0.269	0.0241293
Ago3	1.22429e-05	0.160081	0.428	0.218	0.190169
Rps7	6.97081e-09	0.159811	1	1	0.000110048
Cyb5b	1.20082e-05	0.15866	0.646	0.383	0.186548
Park2	4.56728e-06	0.158412	0.284	0.12	0.0712586
Micu3	0.0101041	0.158155	0.856	0.684	133.779
Slitrk3	1.9845e-09	0.158107	0.23	0.051	3.13591e-05
Cdr2	2.30966e-08	0.157892	0.218	0.054	0.000364188
Plekhb1	0.000119431	0.157545	0.498	0.294	1.81965
Rpl7a	1.94427e-07	0.157148	0.992	0.924	0.00305872
Ggnbp2	4.62833e-05	0.156985	0.763	0.513	0.712162
Hpcal1	4.05657e-05	0.156889	0.895	0.665	0.624956
Ddc	3.22644e-05	0.156742	0.323	0.155	0.498001
Col25a1	3.32892e-08	0.15634	0.268	0.082	0.000524738
Mrpl32	7.20068e-08	0.155978	0.475	0.206	0.00113404
Txndc17	2.2558e-05	0.155762	0.724	0.468	0.349153
Dbpht2	0.000303622	0.155639	0.712	0.491	4.56708
Pdk1	5.50001e-05	0.155169	0.428	0.237	0.844747
Mnt	6.13452e-09	0.154871	0.268	0.076	9.68641e-05
Rims3	4.28693e-05	0.154847	0.739	0.462	0.660101
Rpl22	0.000550836	0.154745	0.934	0.763	8.19314
Lnpk	1.1998e-05	0.154493	0.626	0.348	0.186413
Anxa6	1.52027e-08	0.154276	0.339	0.117	0.000239762
Mirg	3.6277e-05	0.154098	0.564	0.335	0.559356
Kcnq1ot1	0.000121244	0.153878	0.973	0.845	1.84678
Kdm6b	1.61951e-05	0.153771	0.393	0.193	0.251203
Acsl1	1.01039e-06	0.153474	0.327	0.133	0.015849
Gabrg1	0.00109009	0.152924	0.549	0.38	15.911
Dgkd	2.50161e-05	0.152884	0.416	0.215	0.386874
Vkorc1l1	6.20268e-06	0.152135	0.393	0.193	0.0966625
Eef1d	6.49604e-06	0.151996	0.502	0.263	0.101208
Cdkl2	2.26388e-05	0.151856	0.626	0.37	0.350358
Rrm2b	2.21151e-07	0.1512	0.354	0.142	0.00347848
Pak3	6.31234e-05	0.150947	0.992	0.921	0.968376
Ggct	4.69473e-08	0.150857	0.311	0.108	0.000739701
Large1	5.33881e-05	0.150797	0.444	0.241	0.820361
Ppp6c	3.17343e-08	0.150351	0.401	0.158	0.000500323
Rasgrf1	5.88095e-05	0.149289	0.533	0.307	0.902667
Hook2	3.92578e-06	0.14917	0.409	0.193	0.0612736
Mgat5	1.2592e-05	0.148913	0.58	0.313	0.195528
Ncs1	0.000130391	0.148128	0.786	0.551	1.98442
Snn	2.47041e-05	0.147533	0.634	0.358	0.382099
Tmx3	5.33704e-05	0.147265	0.51	0.282	0.820143
Chp1	0.00126377	0.147168	0.751	0.532	18.3525
Phactr1	3.82307e-06	0.146648	0.63	0.351	0.059682
Esf1	3.04375e-06	0.146503	0.409	0.193	0.0475494
Ddhd1	2.58428e-05	0.146143	0.545	0.294	0.399503
Gm9493	3.61991e-05	0.146047	0.44	0.241	0.558189
Ogfod1	0.000100422	0.145958	0.638	0.377	1.53284
Rpl36a-ps1	1.33297e-06	0.145736	0.3	0.117	0.0208916
Srebf2	7.43077e-07	0.145185	0.595	0.316	0.0116648
Kcnk2	0.00139168	0.145092	0.755	0.506	20.1529
Usp48	6.55638e-06	0.144997	0.424	0.206	0.102129
Uri1	0.000397729	0.14499	0.529	0.32	5.95242
Chuk	7.67433e-07	0.144666	0.447	0.209	0.0120456
Tmf1	1.54255e-07	0.144509	0.424	0.18	0.00242735
Nos1ap	1.45699e-05	0.144462	0.638	0.348	0.226096
Myef2	9.52673e-05	0.144225	0.724	0.468	1.45492
Eif3k	7.40491e-05	0.143925	0.934	0.658	1.13399
Kif5a	0.000511321	0.143805	0.872	0.649	7.61766
Hspe1	0.000111385	0.143439	0.949	0.772	1.69862
Mrap2	0.000319737	0.143378	0.401	0.234	4.80341
Caln1	9.25225e-05	0.142643	0.37	0.193	1.41328
Kit	5.58476e-06	0.142514	0.148	0.038	0.0870608
Hapln4	3.6598e-07	0.142355	0.377	0.158	0.00575211
Tnpo2	1.4944e-06	0.142069	0.494	0.241	0.0234142
Ormdl1	4.32835e-05	0.142067	0.261	0.117	0.666436
Jam3	3.09988e-05	0.14206	0.475	0.25	0.478653
Stx4a	6.981e-05	0.141847	0.405	0.218	1.06984
Usp20	0.000153924	0.141806	0.521	0.307	2.3355
Rpl36a	0.000302694	0.14144	1	0.978	4.55343
Aff4	0.00116119	0.141356	0.895	0.677	16.9138
Idi1	9.13646e-05	0.141299	0.265	0.123	1.39587
Yme1l1	2.1803e-05	0.141009	0.677	0.408	0.337576
Cntnap4	1.10355e-05	0.140811	0.428	0.215	0.171537
Tob1	2.12308e-07	0.140765	0.331	0.127	0.0033396
Lyrm9	0.000183882	0.140448	0.545	0.335	2.7847
Sgms1	5.63601e-07	0.140384	0.311	0.117	0.00885079
Syne2	7.45058e-06	0.140222	0.323	0.142	0.116013
Safb2	0.000120959	0.140071	0.576	0.342	1.84257
Mlec	0.00125194	0.140068	0.634	0.427	18.1895
Mpc1	2.2419e-05	0.139898	0.533	0.291	0.347024
Pnisr	0.000979038	0.139716	0.942	0.801	14.3312
Eif3m	4.76023e-05	0.139645	0.751	0.449	0.732267
Epdr1	2.21585e-05	0.139606	0.619	0.358	0.343035
Gskip	8.51906e-06	0.139248	0.463	0.234	0.132557
Sema3a	6.57811e-07	0.139183	0.206	0.06	0.0103283
Rragd	2.81815e-06	0.139044	0.331	0.139	0.044042
Rlim	1.73378e-05	0.139009	0.537	0.285	0.268806
Trp53i11	5.28191e-06	0.13885	0.292	0.12	0.0823661
Eif5b	0.000372494	0.138753	0.837	0.608	5.58033
Cdh4	4.38379e-05	0.138619	0.175	0.063	0.67484
Iqsec3	0.000100993	0.138549	0.642	0.396	1.54146
Naa15	0.000163333	0.138383	0.623	0.367	2.47661
Rsrp1	0.000210942	0.138334	0.938	0.782	3.19007
Plcb4	2.86318e-05	0.138278	0.751	0.475	0.442419
Ercc4	1.50468e-06	0.137897	0.175	0.047	0.0235738
Acaca	0.000199609	0.137838	0.502	0.294	3.01988
Cdkl5	3.21863e-05	0.137773	0.541	0.301	0.496828
Ebf4	9.91781e-06	0.137725	0.218	0.079	0.154212
Dpysl2	0.00228012	0.137597	0.992	0.962	32.5077
Ankrd12	7.29478e-05	0.136848	0.848	0.614	1.11749
Magee1	0.000320392	0.136433	0.689	0.427	4.81294
Ripor2	5.71657e-05	0.136067	0.362	0.184	0.87755
Mtfr1l	2.01311e-06	0.135922	0.346	0.149	0.0315072
Tdrp	9.05944e-08	0.135429	0.257	0.079	0.00142623
Rpl10	3.17783e-08	0.134443	1	1	0.000500985
Galnt13	5.60395e-06	0.134363	0.467	0.234	0.0873544
Rps13	3.52119e-05	0.134342	1	0.981	0.543002
Aifm3	1.30574e-06	0.134137	0.327	0.13	0.0204674
Polr1d	0.00175715	0.133457	0.825	0.63	25.2432
As3mt	8.23078e-07	0.133448	0.327	0.13	0.0129174
Ecel1	0.00190485	0.133388	0.58	0.43	27.2946
Bicd1	0.0029508	0.133045	0.794	0.56	41.6446
Znrf3	1.97732e-08	0.132448	0.167	0.028	0.000311804
Pmm2	1.22018e-05	0.132204	0.171	0.054	0.189543
Arpc3	7.65492e-06	0.131794	0.603	0.329	0.119179
Seh1l	4.52744e-06	0.131604	0.331	0.142	0.0706462
2610507B11Rik	4.2009e-05	0.131533	0.49	0.263	0.64698
Pacsin1	0.000498483	0.131378	0.786	0.535	7.42839
Chchd10	0.000376422	0.131239	0.868	0.62	5.63767
Plxnc1	7.88958e-06	0.131145	0.693	0.399	0.122809
Rpl6	9.40342e-07	0.131014	1	1	0.0147558
Ptprm	2.50325e-06	0.130936	0.245	0.089	0.0391332
Cgn	1.34217e-06	0.130883	0.28	0.104	0.0210345
Astn1	5.435e-05	0.130686	0.895	0.684	0.834816
Prlr	0.0238317	0.130499	0.852	0.753	294.44
Mkl2	0.000643373	0.130179	0.774	0.519	9.52643
Fdft1	3.74505e-05	0.130003	0.339	0.168	0.577337
Ahcyl2	0.000740573	0.129752	0.63	0.396	10.9309
Zfp740	5.93695e-06	0.129358	0.401	0.187	0.0925274
Sltm	0.000271986	0.129315	0.677	0.437	4.09855
Brinp2	2.52861e-05	0.129262	0.611	0.351	0.390999
Adarb2	2.58557e-07	0.129261	0.549	0.259	0.00406556
Mllt10	1.34311e-05	0.129249	0.502	0.253	0.20849
Swi5	0.00117755	0.12911	0.895	0.69	17.1404
Dnajb4	0.00257722	0.128752	0.712	0.497	36.5759
Supt16	0.000188435	0.128572	0.339	0.18	2.85291
Rab40b	1.29697e-06	0.12847	0.202	0.06	0.0203312
Ppip5k1	1.93705e-05	0.128347	0.444	0.222	0.300146
Tarsl2	2.4086e-06	0.128124	0.272	0.104	0.0376608
Ldlr	1.41103e-06	0.128111	0.222	0.073	0.0221108
Tmem106b	0.0023756	0.12811	0.72	0.506	33.7905
Dhx40	1.55373e-06	0.128085	0.261	0.095	0.0243376
Phkb	1.31326e-06	0.127796	0.226	0.073	0.020584
Ermp1	4.69958e-06	0.127738	0.23	0.082	0.0733135
Kctd10	5.38733e-05	0.127701	0.288	0.133	0.827548
Ensa	0.00311052	0.127657	0.732	0.522	43.7899
Srf	7.75772e-08	0.127476	0.218	0.057	0.00122145
Clmp	3.10013e-06	0.127409	0.502	0.256	0.0484272
Sh3glb1	9.82337e-06	0.127381	0.416	0.199	0.152753
Fgd3	8.50048e-06	0.126475	0.101	0.016	0.132285
Apbb2	1.81958e-05	0.12642	0.463	0.241	0.282053
Wnk3	2.21085e-06	0.126372	0.37	0.158	0.03458
Tead1	0.000670028	0.126132	0.506	0.326	9.91239
Hnrnpl	3.19262e-06	0.126013	0.603	0.323	0.0498655
Rpl13a	0.000116094	0.12592	0.984	0.921	1.76951
Ralgapa1	0.000622971	0.125758	0.545	0.345	9.23493
Coa5	0.00023585	0.125429	0.482	0.275	3.56205
Ogt	0.00364619	0.125381	0.981	0.911	51.0102
Slc6a11	0.0118024	0.124891	0.525	0.367	154.683
St3gal1	1.66167e-05	0.124848	0.261	0.108	0.257692
Celf3	0.000296464	0.124264	0.681	0.418	4.46208
Synj1	0.011553	0.124205	0.949	0.845	151.599
Ccdc174	6.2426e-05	0.123952	0.502	0.275	0.957802
Clasrp	9.19985e-06	0.123939	0.346	0.158	0.143085
Lrfn5	0.000615196	0.123549	0.957	0.813	9.12335
Phf1	1.79865e-06	0.12328	0.374	0.161	0.0281632
Rps27l	7.23306e-06	0.122992	0.533	0.269	0.11264
Ppp6r2	6.2107e-05	0.122886	0.358	0.18	0.95297
Eif3h	0.00193396	0.122859	0.934	0.801	27.6981
Stard4	2.24414e-06	0.12282	0.206	0.066	0.0350984
Nop53	0.000314303	0.122401	0.63	0.399	4.72334
Per3	0.000117028	0.122332	0.482	0.269	1.78327
Mgat1	0.000171745	0.122231	0.409	0.222	2.60245
Cdk9	1.47141e-05	0.121632	0.37	0.171	0.228318
Golt1b	8.81753e-05	0.121369	0.366	0.187	1.34776
Esyt2	2.26877e-05	0.121022	0.327	0.152	0.351091
Zmat2	0.00291733	0.120995	0.798	0.554	41.1956
Smc3	1.85766e-05	0.120848	0.549	0.294	0.287918
Fam213b	0.000175469	0.120729	0.603	0.358	2.658
Bccip	2.02535e-06	0.120586	0.44	0.209	0.0316947
Naca	0.000461105	0.120485	1	0.962	6.88291
Ikzf2	1.67039e-06	0.120452	0.245	0.085	0.0261583
Hebp2	2.03234e-06	0.120127	0.187	0.054	0.0318021
Osbpl8	6.25248e-05	0.11995	0.549	0.31	0.959255
Mut	0.000151377	0.119945	0.237	0.108	2.29761
Srxn1	3.29246e-05	0.119818	0.455	0.237	0.508092
Zdhhc18	6.80617e-07	0.119752	0.206	0.06	0.0106857
Sec23b	4.94512e-06	0.119713	0.23	0.082	0.0771242
Trim41	1.34761e-05	0.119681	0.245	0.098	0.209176
Ago1	5.42408e-06	0.119557	0.393	0.177	0.0845722
Epb41l4aos	3.7591e-05	0.119229	0.381	0.187	0.579465
C2cd5	0.000274788	0.119145	0.564	0.335	4.13859
Apoc3	1.02156e-05	0.119078	0.455	0.231	0.158832
Chml	2.4491e-05	0.119072	0.319	0.146	0.378827
Trove2	0.000101784	0.119026	0.556	0.31	1.55332
Dcp2	0.000322906	0.118915	0.518	0.294	4.85005
Cnpy3	0.000409411	0.118888	0.377	0.209	6.12315
Creb3l1	3.48668e-07	0.118568	0.121	0.016	0.00548036
Sbf2	4.04867e-05	0.118452	0.475	0.25	0.623819
Gm39244	6.96073e-06	0.118319	0.148	0.038	0.108413
Fsd1l	5.21849e-05	0.118282	0.537	0.291	0.802186
Fam204a	0.000214732	0.117984	0.521	0.297	3.24631
Pam	0.00184675	0.117684	0.658	0.456	26.4787
Kmt2a	0.000571074	0.117534	0.708	0.465	8.48616
Stat3	1.48022e-05	0.117407	0.288	0.123	0.229671
Sntb2	1.59349e-08	0.117279	0.14	0.016	0.000251293
Ankrd6	2.89898e-05	0.117099	0.506	0.269	0.447922
Rasa4	1.75879e-05	0.116988	0.128	0.032	0.272665
Taf15	0.00014143	0.116793	0.506	0.291	2.14874
Dock10	2.54716e-06	0.116579	0.136	0.028	0.0398172
Supt5	0.000344066	0.11649	0.595	0.351	5.16202
Slitrk2	0.00376133	0.116479	0.265	0.155	52.512
Myo9a	0.000600292	0.11564	0.553	0.329	8.90714
Nudcd2	6.85439e-05	0.115544	0.362	0.18	1.05064
Gatad1	0.0065445	0.115455	0.459	0.31	88.9398
Fbxo33	0.000471012	0.115443	0.615	0.367	7.02797
Birc6	0.00116388	0.115163	0.568	0.361	16.9519
Riok2	2.28734e-06	0.115163	0.187	0.054	0.0357694
Api5	1.28323e-05	0.115108	0.42	0.206	0.199234
Atp6v1h	5.62742e-05	0.115044	0.553	0.313	0.864146
Senp8	1.32901e-05	0.114995	0.253	0.101	0.206316
Erc1	6.71645e-05	0.114987	0.44	0.237	1.02977
Gabra3	0.00128117	0.114937	0.7	0.465	18.5962
Chchd5	2.1164e-06	0.114923	0.3	0.117	0.033109
Ide	4.44846e-06	0.114908	0.284	0.114	0.0694183
Ttc39b	1.64097e-05	0.114706	0.23	0.089	0.254497
Dnajc15	2.75128e-05	0.114552	0.444	0.228	0.425265
Mapk9	0.00176447	0.114316	0.669	0.434	25.3431
Esyt3	0.000532899	0.11406	0.249	0.123	7.93167
Bend5	4.50067e-07	0.114037	0.233	0.073	0.00707055
Entpd5	1.89041e-06	0.114001	0.171	0.044	0.0295906
Il1rapl2	3.99849e-05	0.113926	0.163	0.054	0.616127
Pde1c	0.0039372	0.113911	0.619	0.427	54.8334
Dusp3	2.28596e-05	0.113875	0.572	0.307	0.35373
Tmem237	4.94869e-06	0.113828	0.412	0.193	0.0771748
Srpk1	8.23468e-05	0.113797	0.416	0.218	1.25974
Acly	0.000222966	0.113757	0.564	0.326	3.36991
Frrs1l	8.25204e-05	0.113716	0.821	0.541	1.26232
Uqcc1	0.000126715	0.113606	0.331	0.168	1.92911
Carf	0.00059019	0.113486	0.374	0.206	8.76256
Kmt2d	8.71952e-05	0.113189	0.354	0.177	1.33304
Nktr	0.00607243	0.11313	0.868	0.68	83.0041
Srsf3	0.000482382	0.113127	0.883	0.639	7.19376
Gtf2a1	6.05422e-05	0.112892	0.436	0.231	0.92908
Sdhaf1	5.26777e-05	0.112846	0.405	0.209	0.809656
Clock	1.32468e-05	0.112807	0.669	0.396	0.205656
Ormdl3	0.00225468	0.112805	0.463	0.285	32.1563
Ssh1	2.48694e-06	0.112779	0.385	0.171	0.0388808
Zc3h7b	0.000726675	0.112663	0.494	0.304	10.7315
Pdrg1	2.93283e-05	0.112439	0.331	0.155	0.453122
Tmcc1	0.00171197	0.11231	0.634	0.418	24.6164
Amy1	8.99441e-05	0.112283	0.311	0.149	1.37435
Rcn1	0.000359792	0.111973	0.432	0.247	5.39292
Mrpl9	0.000133665	0.111867	0.292	0.142	2.03372
A230050P20Rik	0.000472527	0.111738	0.428	0.247	7.04963
Gar1	5.33244e-05	0.111593	0.37	0.18	0.819489
Kras	0.000549667	0.111531	0.63	0.399	8.17685
Twistnb	6.72891e-05	0.11147	0.397	0.203	1.03161
Snrnp25	9.47429e-07	0.111294	0.245	0.082	0.0148661
Agps	0.000114568	0.111285	0.296	0.142	1.7467
Zfp942	2.51731e-05	0.111267	0.253	0.104	0.389277
Smim20	0.000214638	0.111246	0.346	0.18	3.24533
Gm16485	9.19735e-07	0.1111	0.272	0.095	0.0144334
Ppm1f	2.96197e-06	0.111	0.315	0.13	0.0462778
Glra3	0.000863905	0.110937	0.288	0.155	12.6925
Gsk3b	0.00777521	0.110832	0.965	0.896	104.483
Hsph1	0.00251649	0.110527	0.93	0.782	35.7317
Dbn1	0.00255398	0.110391	0.595	0.383	36.2563
Arglu1	0.00634332	0.11032	0.805	0.604	86.4975
Sema6d	0.00013712	0.110202	0.28	0.133	2.08477
Prpf39	0.000597216	0.110191	0.342	0.187	8.86269
Ern2	2.70176e-06	0.110179	0.109	0.016	0.0422285
Ik	0.00016337	0.109875	0.428	0.234	2.47702
Eif2s3x	0.00240398	0.109857	0.732	0.491	34.1894
Lrrfip2	0.000308107	0.109792	0.346	0.184	4.63332
Wapl	0.00014317	0.1097	0.436	0.237	2.17461
Sub1	0.00708558	0.109584	0.942	0.851	95.7545
Rnmt	4.60041e-05	0.109488	0.514	0.272	0.708003
Psmc1	0.00079526	0.109414	0.599	0.373	11.7134
Arhgef28	0.000138211	0.109375	0.206	0.085	2.10123
Ctnna2	0.00778955	0.109299	0.665	0.472	104.66
Hsf2	2.57209e-05	0.109073	0.323	0.146	0.397646
Rgs7bp	0.000341496	0.109023	0.268	0.133	5.12381
Rad51d	4.74503e-05	0.108821	0.16	0.054	0.730022
Senp2	0.000230172	0.108769	0.518	0.304	3.47812
0610030E20Rik	6.96624e-05	0.10874	0.288	0.133	1.06765
Itpkb	8.75604e-05	0.108631	0.144	0.047	1.33845
Pdzd8	3.02921e-05	0.108502	0.401	0.199	0.467831
Keap1	0.000268789	0.108451	0.537	0.31	4.05064
Ttc21b	4.07644e-05	0.108275	0.276	0.123	0.627976
Fam210a	1.38229e-05	0.108172	0.268	0.111	0.214546
Cpeb1	3.76032e-05	0.108112	0.245	0.101	0.579615
Zbtb38	0.000835914	0.108039	0.416	0.237	12.2888
Abcc1	6.23591e-06	0.10798	0.179	0.054	0.0971741
Qsox1	2.01245e-05	0.107955	0.214	0.079	0.311728
Cmtr1	0.000184796	0.107928	0.42	0.225	2.79836
Cbl	0.00051009	0.107747	0.502	0.301	7.59983
Rpl18a	0.000543732	0.107745	1	0.994	8.09073
Paxbp1	7.85118e-05	0.107566	0.409	0.209	1.20154
Madd	0.00514191	0.107172	0.654	0.434	70.8555
Acadm	1.21691e-06	0.107035	0.21	0.063	0.0190811
Nrsn1	0.000234882	0.107027	0.996	0.959	3.54766
Ugp2	9.59205e-06	0.107024	0.214	0.076	0.149166
Acsl6	2.28621e-05	0.106988	0.358	0.171	0.353745
Rrn3	4.27694e-05	0.106834	0.506	0.269	0.658606
Ngef	8.74084e-05	0.106664	0.21	0.085	1.33621
Arcn1	0.000299923	0.106632	0.63	0.37	4.51295
Ccdc85a	0.000138886	0.106629	0.37	0.199	2.11121
Mtus1	0.00023486	0.106597	0.304	0.155	3.54756
Mfap3l	1.24212e-05	0.106133	0.183	0.06	0.192914
Oxtr	4.74747e-06	0.106123	0.074	0.003	0.0740511
Ppp1r16b	2.28038e-06	0.106093	0.265	0.098	0.0356629
Sec22b	0.000892555	0.106011	0.409	0.234	13.0956
Mfn1	0.000124523	0.105904	0.335	0.168	1.89598
Rcbtb1	7.66859e-05	0.105894	0.335	0.165	1.17398
Pak2	0.000106754	0.105849	0.444	0.237	1.62885
Rtn4	0.00340959	0.105776	0.895	0.753	47.8195
Cdyl	2.28838e-05	0.105681	0.144	0.041	0.354013
Socs4	5.37843e-05	0.105651	0.195	0.073	0.826289
Vdac2	0.00102799	0.105515	0.693	0.427	15.0302
Plpbp	5.13064e-05	0.105189	0.428	0.218	0.788887
Bmi1	0.000234485	0.105064	0.401	0.215	3.54236
Chac2	2.82625e-05	0.104982	0.195	0.07	0.436769
Lig4	9.11429e-06	0.104764	0.187	0.06	0.141773
Slitrk6	0.000140469	0.104702	0.214	0.092	2.13471
Edil3	0.000552017	0.104459	0.638	0.427	8.21015
Fndc9	0.0227569	0.104432	0.646	0.465	282.459
Znfx1	0.000356784	0.104418	0.117	0.038	5.34962
Trrap	1.05759e-05	0.104379	0.525	0.272	0.164403
Psd3	0.0011106	0.104322	0.634	0.402	16.2003
Plppr3	0.000607979	0.104257	0.553	0.323	9.01815
Csnk1g2	0.00147629	0.104226	0.494	0.294	21.3323
Syt17	1.05461e-06	0.104223	0.187	0.051	0.0165405
Galnt10	0.000116569	0.104165	0.214	0.089	1.77639
Mpp5	4.34085e-05	0.10406	0.385	0.193	0.668317
Rdh13	0.000170076	0.104036	0.237	0.104	2.57749
Prdx6	0.000856584	0.103896	0.451	0.263	12.5875
Ppa2	5.35486e-05	0.103882	0.288	0.13	0.822775
Asrgl1	1.94887e-05	0.10377	0.23	0.089	0.301958
Eif2a	0.00056982	0.103753	0.447	0.253	8.46809
Nin	8.63302e-06	0.103746	0.222	0.079	0.134321
Spire1	0.0022005	0.103656	0.459	0.282	31.3946
Pknox2	0.000115503	0.103624	0.171	0.063	1.76061
Med28	0.0151521	0.103602	0.887	0.684	194.493
Igdcc4	1.24305e-05	0.103593	0.397	0.19	0.193046
Tigar	0.000627079	0.103499	0.319	0.171	9.29205
Arhgap24	0.000575259	0.103324	0.327	0.174	8.54719
Taf1	0.000309748	0.103242	0.49	0.272	4.65706
Stx5a	4.99183e-05	0.103183	0.514	0.269	0.767643
Anxa7	3.4221e-05	0.103042	0.401	0.199	0.527858
Pik3r3	1.90284e-05	0.102868	0.35	0.161	0.294883
Ola1	0.00300473	0.10278	0.525	0.339	42.3696
Qdpr	0.000146578	0.102636	0.416	0.218	2.22563
Uchl5	0.00180353	0.102563	0.296	0.168	25.877
Trp53inp1	0.000247674	0.102482	0.21	0.092	3.73864
Pip5k1b	9.0069e-06	0.102381	0.14	0.035	0.140111
Kctd13	0.000440837	0.102305	0.393	0.222	6.58478
Zfp810	1.95325e-06	0.102155	0.163	0.041	0.0305722
Pum2	0.00817405	0.101867	0.778	0.563	109.491
Rnf138	1.23857e-05	0.101745	0.288	0.12	0.192375
Nrbf2	0.000251676	0.101727	0.206	0.089	3.79754
Zc3h14	0.000248129	0.101672	0.447	0.25	3.74501
Rpl29	0.000718597	0.101653	1	0.978	10.6151
Ptbp3	3.76898e-05	0.10133	0.253	0.104	0.580912
Tnpo3	0.000392032	0.101198	0.564	0.335	5.86832
Mrps18c	0.000179353	0.101181	0.354	0.184	2.71665
Zdhhc6	0.000237661	0.100892	0.284	0.139	3.58915
Luzp2	0.000409516	0.100555	0.451	0.263	6.12432
Emb	0.000346492	0.100446	0.409	0.222	5.19738
Rpl39	0.000120378	0.100424	1	0.997	1.83383
1810037I17Rik	0.0108015	0.100397	0.782	0.557	142.396
Lap3	2.1147e-05	0.100389	0.175	0.057	0.327482
Rictor	8.48693e-05	0.100332	0.463	0.241	1.29808
Gadd45a	6.48826e-06	0.100326	0.179	0.054	0.101094
Aqp5	3.55723e-06	0.100299	0.066	0	0.0555462
2010107E04Rik	0.0375204	0.100298	0.817	0.671	437.75
Lrig2	0.000488787	0.100281	0.37	0.206	7.28732
March8	7.72805e-05	0.0999324	0.494	0.269	1.18301
Ext1	0.000358352	0.0998504	0.21	0.095	5.37277
Rev1	0.00202507	0.099708	0.416	0.247	28.9646
Ssr3	0.0191518	0.0995514	0.732	0.554	241.447
Cnksr2	9.161e-06	0.0995301	0.261	0.101	0.14249
Itgav	5.84559e-05	0.0994715	0.121	0.032	0.897299
Zfp934	7.7851e-06	0.0993489	0.136	0.032	0.121198
Exosc9	7.88054e-06	0.0993093	0.195	0.063	0.122676
Ctsb	0.0060839	0.0991837	0.833	0.617	83.1425
Ccpg1	0.000249896	0.0991438	0.346	0.18	3.77118
AU019823	8.22774e-05	0.0990773	0.237	0.101	1.25876
Lman1	2.28817e-05	0.0990467	0.397	0.193	0.354003
Rbms3	0.00169168	0.0989751	0.475	0.291	24.3314
Nup98	1.02656e-05	0.0989243	0.327	0.139	0.1596
Rpl28	0.00141276	0.0984673	0.984	0.927	20.4498
Acyp2	0.000368159	0.0984293	0.206	0.092	5.5165
Zranb2	0.0208026	0.0984238	0.93	0.722	260.22
Sdc2	0.00015575	0.0982985	0.389	0.209	2.36272
Slc7a1	0.000110904	0.0981472	0.506	0.282	1.6914
Camk4	0.000743751	0.0981458	0.311	0.171	10.977
Fam184a	4.65864e-05	0.0980576	0.241	0.101	0.716778
Polr2a	5.52119e-05	0.0977586	0.37	0.18	0.847945
Nfic	0.000174755	0.0977189	0.288	0.142	2.64736
Trim28	3.02504e-06	0.0977134	0.389	0.174	0.0472602
Kcnmb4	0.000123261	0.0977097	0.249	0.111	1.87701
Etfb	0.000160368	0.0975054	0.183	0.073	2.43198
C1ql2	0.000642087	0.0972836	0.109	0.035	9.50802
Baiap3	0.00440271	0.0971892	0.938	0.722	61.048
Alg10b	0.000832786	0.0970519	0.424	0.237	12.2461
Shank2	2.25992e-05	0.0970122	0.307	0.136	0.349767
Galnt7	2.1147e-05	0.0968088	0.175	0.057	0.327461
Nae1	0.000128873	0.0967953	0.339	0.168	1.96183
Tmem229a	4.02567e-07	0.0966877	0.148	0.028	0.00632635
Mbtd1	0.0022108	0.0966456	0.42	0.259	31.5348
Ado	4.19363e-05	0.0966424	0.152	0.047	0.645902
Trim44	0.00407936	0.0964614	0.864	0.589	56.7316
Odf2	0.000350577	0.0964351	0.65	0.402	5.25796
Krr1	1.56193e-05	0.0963345	0.37	0.171	0.242317
Uvssa	0.000136401	0.0962797	0.241	0.108	2.07425
Timm17a	0.00138179	0.0962033	0.626	0.399	20.0138
Btf3	0.0103987	0.0960138	0.868	0.674	137.408
Eif4a2	0.00212722	0.095679	1	0.987	30.3703
Etfbkmt	3.90661e-06	0.0956418	0.121	0.022	0.0609782
Scn2b	0.0234807	0.0955492	0.634	0.472	290.621
E130307A14Rik	0.000253718	0.0955416	0.389	0.206	3.82758
Sephs2	0.000785153	0.0954594	0.432	0.247	11.5708
Cetn2	0.00045977	0.0954502	0.471	0.269	6.86437
Sesn3	0.000460193	0.0954212	0.794	0.522	6.87021
Zfp467	0.00115653	0.0953729	0.3	0.161	16.8472
Bsdc1	0.000194577	0.0952688	0.428	0.237	2.94433
Rbm3	0.00122697	0.0952614	0.486	0.288	17.8378
B3galt6	1.58041e-05	0.095259	0.284	0.117	0.245153
Opa3	5.04232e-05	0.0952192	0.319	0.149	0.775358
4933427D14Rik	4.77108e-05	0.0951108	0.265	0.114	0.733888
Dnal1	0.000135909	0.094831	0.482	0.269	2.06718
Krtcap2	0.000591769	0.094795	0.591	0.367	8.78481
Phc3	0.00289205	0.0947733	0.432	0.266	40.856
Gm4924	4.35906e-05	0.094543	0.183	0.063	0.671078
Ece2	0.000404353	0.0943377	0.331	0.174	6.04912
Rps9	0.00332859	0.0942296	1	0.997	46.7234
Atrx	0.00562758	0.0942046	0.681	0.468	77.261
Ppm1h	6.61016e-05	0.0941997	0.253	0.111	1.01373
Fut9	0.000869902	0.094195	0.591	0.364	12.7771
Gfra1	0.00330564	0.0941471	0.506	0.326	46.4178
Dock3	0.00058522	0.0941103	0.51	0.304	8.6911
Dkc1	0.000189299	0.0938911	0.28	0.133	2.86561
Cxxc5	0.00058625	0.0937045	0.315	0.168	8.70522
Pias1	0.000334578	0.0936825	0.42	0.228	5.02402
Eif5a2	0.000319069	0.0936812	0.268	0.13	4.7937
Itch	0.000811072	0.0933725	0.486	0.278	11.9414
Eif4b	0.0179112	0.0933537	0.747	0.544	226.971
9030624J02Rik	0.00106682	0.0933397	0.319	0.174	15.5841
Fam189a2	0.000171819	0.0932543	0.152	0.054	2.60339
Nabp1	5.9502e-05	0.093196	0.132	0.038	0.913236
Rubcn	0.00063108	0.0928535	0.405	0.225	9.34756
Dnajc10	0.00126326	0.0927464	0.467	0.282	18.3463
Rab37	1.80282e-06	0.0926277	0.07	0	0.028225
Sos2	0.000566599	0.0926052	0.381	0.212	8.4225
Zfp937	0.000155282	0.0924434	0.183	0.073	2.35594
1700048O20Rik	9.49181e-05	0.0923395	0.128	0.038	1.44968
Kl	0.00209804	0.0922757	0.241	0.127	29.9726
D3Ertd254e	1.20038e-05	0.0920795	0.265	0.104	0.186491
Zfp553	0.000674468	0.0920766	0.241	0.117	9.97741
Srp68	0.000348332	0.0920284	0.374	0.199	5.22463
Mrps9	0.000335923	0.0920106	0.28	0.136	5.04355
Ccar1	0.000288682	0.0919425	0.564	0.326	4.34553
Hpgds	0.000141612	0.0918127	0.132	0.041	2.15136
Zpr1	7.546e-06	0.0918096	0.261	0.101	0.117491
Mga	0.000561062	0.0917999	0.619	0.367	8.34244
Plcb1	0.00129845	0.0917872	0.315	0.177	18.8379
Usp53	0.000135269	0.0917854	0.163	0.06	2.05758
Mis12	0.000135914	0.0917658	0.23	0.098	2.06711
Nr2f6	0.00133149	0.0917541	0.198	0.095	19.3026
Alkbh5	0.000203664	0.0916623	0.451	0.244	3.08083
D430042O09Rik	0.000402297	0.091636	0.331	0.174	6.01877
Vps13c	0.00138471	0.0916328	0.37	0.212	20.0547
Armcx5	5.17583e-05	0.0915998	0.272	0.117	0.795681
Nectin3	0.00298777	0.0915608	0.3	0.174	42.1455
Rab3c	0.0654211	0.0914327	0.844	0.652	698.893
Frmd5	7.83977e-05	0.0912924	0.171	0.06	1.19988
Sdhaf4	2.81892e-05	0.0912769	0.451	0.228	0.435664
B3galt2	0.00127317	0.0910817	0.167	0.076	18.4826
Gucy1a1	1.56559e-05	0.090974	0.198	0.07	0.242869
Ptpn11	0.00164701	0.0909381	0.545	0.332	23.7136
Slco3a1	0.000151756	0.090894	0.35	0.184	2.30305
Kifc2	0.000514662	0.090847	0.475	0.269	7.66589
Mrpl30	0.00380294	0.0906635	0.735	0.481	53.0472
Snd1	0.000202807	0.0906492	0.358	0.184	3.06807
Tab2	0.00474282	0.0906418	0.432	0.272	65.56
Krt222	0.000894189	0.090595	0.222	0.108	13.1186
Mrps33	0.00267537	0.0905582	0.685	0.443	37.91
Zfp952	7.4475e-05	0.0905232	0.253	0.111	1.14044
Syncrip	0.00194036	0.0904492	0.451	0.278	27.782
Nlk	0.000153593	0.0903034	0.405	0.209	2.33062
Brox	0.0010493	0.090163	0.436	0.244	15.3324
Tada3	0.000112889	0.0901291	0.183	0.07	1.72122
Iqce	0.000109883	0.0900546	0.265	0.12	1.67594
Irak1	0.000666902	0.0899717	0.482	0.285	9.86815
Magi3	3.32739e-05	0.0899553	0.292	0.127	0.513383
Trpm2	3.45144e-05	0.0898277	0.202	0.076	0.532351
Tmem267	4.93049e-05	0.0897485	0.21	0.082	0.758359
Gmps	0.00208381	0.0897386	0.825	0.579	29.7797
Tmem184c	0.00123795	0.0897239	0.319	0.177	17.9924
P4ha2	0.000116458	0.0897103	0.144	0.047	1.77481
Mturn	5.69808e-05	0.0896672	0.35	0.168	0.874883
Pou2f1	0.000460432	0.089641	0.265	0.13	6.87332
Stx16	0.00618149	0.0896197	0.728	0.503	84.3958
Chid1	0.00287339	0.0895623	0.362	0.215	40.6067
Cep126	4.14881e-05	0.0894383	0.268	0.114	0.639083
Nme1	0.0315861	0.0893986	0.817	0.62	376.791
Tmem161b	0.000108702	0.0893029	0.198	0.079	1.65813
Pts	6.50506e-05	0.0891124	0.335	0.158	0.997876
Snapin	0.000264716	0.0891007	0.335	0.171	3.9898
Gm3636	1.97386e-05	0.0890039	0.14	0.038	0.305811
Cyb5r3	0.000478345	0.0889947	0.502	0.288	7.13499
Arl6ip5	0.00253088	0.0889833	0.599	0.396	35.9309
Stx3	0.00266995	0.0889177	0.304	0.171	37.8385
Klf7	0.000420514	0.0887555	0.591	0.345	6.28499
Luc7l2	0.00582337	0.0886976	0.934	0.778	79.7861
Zfp369	2.94612e-05	0.0886927	0.183	0.063	0.455088
Ccdc112	0.000678991	0.0885706	0.405	0.222	10.0416
Spag9	0.0173989	0.0883863	0.86	0.687	220.931
Kcnh2	0.000179761	0.0883506	0.198	0.082	2.72266
Ctps	0.00211345	0.0883311	0.261	0.142	30.1801
Fkbp14	3.19002e-05	0.0883109	0.167	0.054	0.492507
Atf7ip	0.000247486	0.0882955	0.385	0.206	3.7363
Pak1ip1	6.60322e-05	0.0882904	0.358	0.174	1.01274
Fgf12	8.95073e-05	0.0882373	0.432	0.225	1.36776
Golga4	0.00194489	0.0881973	0.603	0.386	27.8449
Rnf113a2	0.000107075	0.0881682	0.23	0.098	1.63354
Psmd9	0.00177911	0.0881029	0.432	0.253	25.548
Nfu1	0.000363856	0.0880537	0.409	0.218	5.45238
Syf2	9.37381e-06	0.0880529	0.37	0.168	0.145782
Sertad2	0.000218107	0.0880404	0.222	0.098	3.29712
Gan	5.15599e-05	0.0879961	0.183	0.066	0.792682
Npy1r	0.00416388	0.0879113	0.311	0.187	57.8572
Gm4419	6.86188e-05	0.0878778	0.101	0.022	1.05172
Ahcyl1	0.00129693	0.0878674	0.588	0.364	18.8172
Lrrc45	2.94047e-05	0.0878405	0.339	0.155	0.454244
Numa1	0.00040099	0.0876817	0.486	0.278	5.99961
Slf1	8.51621e-06	0.087626	0.366	0.161	0.132521
Banp	0.00107449	0.0875135	0.311	0.168	15.6907
mt-Nd4	0.000272238	0.0874257	1	1	4.10208
Nbea	0.00667443	0.0872919	0.829	0.598	90.5787
Yod1	0.000249119	0.0872301	0.265	0.123	3.75971
Tug1	0.0075408	0.0871067	0.696	0.478	101.575
Zfp410	0.000302501	0.0870907	0.241	0.111	4.55083
Bnip3	0.000362053	0.0870762	0.424	0.228	5.42573
Ubn2	0.000725115	0.0870492	0.739	0.487	10.7092
Usp21	0.000129418	0.0869195	0.233	0.101	1.96988
Gm10073	0.00116448	0.0869178	0.249	0.127	16.9595
Commd8	0.0044938	0.0869121	0.479	0.297	62.2392
Eif3b	0.000422485	0.0868854	0.44	0.244	6.31404
Pigk	0.00423585	0.0867701	0.506	0.316	58.819
Suco	0.000116219	0.086729	0.362	0.18	1.7713
Faf1	0.000469575	0.0867056	0.249	0.12	7.00794
Unc5b	3.4646e-05	0.0866551	0.125	0.032	0.534345
Mak16	0.000273096	0.0866395	0.28	0.136	4.11364
Prkar2a	0.0367812	0.0866383	0.84	0.627	430.12
Zfp626	3.16655e-06	0.0866187	0.093	0.009	0.0494615
Pfas	0.000378068	0.0865309	0.276	0.136	5.66195
N4bp1	0.000755064	0.0864973	0.541	0.32	11.1417
Pbx3	0.0684932	0.0864118	0.163	0.108	727.604
Pigp	0.000234735	0.0863262	0.292	0.142	3.54591
Plxna2	0.000677297	0.0863032	0.704	0.462	10.0179
Fam222a	4.10366e-06	0.0862815	0.218	0.073	0.0640458
Igf1r	0.000714772	0.08623	0.389	0.218	10.5593
Ece1	0.00196489	0.0862293	0.374	0.218	28.1215
H2-T22	7.31057e-05	0.0861625	0.101	0.022	1.11983
Cmc2	0.000566848	0.0860747	0.276	0.139	8.42562
Zbtb8os	0.000278816	0.0858979	0.132	0.044	4.19813
Gosr2	0.000975296	0.0857838	0.479	0.278	14.2793
Prpsap2	0.00376873	0.0857019	0.296	0.171	52.6115
Urb1	1.10382e-05	0.0856919	0.121	0.025	0.171567
Ets2	0.00277078	0.0856047	0.7	0.472	39.2093
Washc5	0.000696524	0.0856022	0.226	0.108	10.2953
Plxnb1	0.000179952	0.0855526	0.202	0.082	2.72537
Magohb	0.000136376	0.0855304	0.16	0.057	2.07401
Pim3	1.72063e-05	0.0854742	0.241	0.092	0.266801
Slc5a5	0.00866404	0.0854353	0.44	0.278	115.726
Amotl1	0.00734562	0.08542	0.541	0.361	99.0556
Igsf9b	0.00283008	0.0854027	0.486	0.304	40.0173
Pgm3	1.81914e-05	0.085382	0.16	0.047	0.282003
Paqr4	7.01561e-05	0.0853609	0.16	0.054	1.075
Slc39a11	0.000577102	0.0853084	0.167	0.07	8.57342
Kcnk10	2.96044e-06	0.0851402	0.136	0.028	0.0462569
Slc25a3	0.00743489	0.0850983	0.856	0.665	100.207
Srrt	0.00110977	0.0850804	0.444	0.256	16.1905
Pmm1	0.00633959	0.0850761	0.595	0.402	86.453
Zdhhc23	3.20674e-06	0.0849712	0.187	0.054	0.0500829
Zfp799	0.00139545	0.0849032	0.167	0.076	20.2047
Rapgef5	0.000625469	0.0846125	0.152	0.06	9.2707
Zfp451	0.00150739	0.0845904	0.642	0.396	21.7652
Fam173a	0.0043814	0.0845764	0.658	0.421	60.77
Kdm5a	0.00350372	0.084533	0.498	0.31	49.0836
Sod1	0.00405783	0.0843918	0.611	0.408	56.4525
Rnf32	0.000477859	0.0842581	0.175	0.073	7.12822
Ddhd2	0.000669624	0.0842264	0.584	0.361	9.90776
Actr2	0.0071345	0.084202	0.879	0.69	96.3799
Mad2l1	2.36845e-05	0.084017	0.109	0.022	0.366376
Rwdd3	0.000221058	0.0839753	0.117	0.035	3.34152
Ubn1	0.000260622	0.0839389	0.362	0.187	3.9294
Use1	0.141628	0.0838866	0.856	0.715	1259.78
Pkp2	2.16345e-05	0.0838737	0.082	0.009	0.334989
2810474O19Rik	8.83822e-05	0.0837605	0.362	0.177	1.35075
Btg3	0.000190764	0.083541	0.136	0.044	2.88722
Mib1	0.00135035	0.0835153	0.479	0.285	19.5652
Trps1	0.000145811	0.0835121	0.257	0.114	2.21428
Gm42418	0.00375847	0.0835017	0.673	0.443	52.4757
Ttl	0.000564429	0.0833155	0.245	0.12	8.3908
Usp32	0.00178776	0.0832984	0.584	0.354	25.6614
Kcnip4	0.00123603	0.0832662	0.214	0.104	17.9669
Prkab2	7.20689e-06	0.0832017	0.268	0.104	0.11224
Eif4e3	0.00100377	0.0831305	0.292	0.158	14.6871
Fam49a	0.000683336	0.0830994	0.362	0.199	10.1052
Gpr45	0.000975657	0.0829862	0.257	0.133	14.2826
Mvd	1.65199e-06	0.0829642	0.105	0.013	0.0258735
Ndufaf2	0.00203217	0.0828704	0.339	0.19	29.0581
Gnl3	0.00484259	0.0828251	0.475	0.31	66.8955
Dgkb	0.029695	0.082769	0.813	0.677	356.192
Mrpl52	0.0210196	0.0826176	0.918	0.741	262.85
Rbm7	0.000155739	0.0826077	0.374	0.187	2.36272
Cnih1	0.00410958	0.0823965	0.564	0.377	57.1355
Tmem64	0.000123466	0.0823234	0.42	0.212	1.88001
Ikbkb	7.99136e-06	0.0820036	0.296	0.12	0.124385
Trpm7	0.00146154	0.0819751	0.335	0.187	21.1294
Gm5914	0.000247522	0.0819585	0.292	0.142	3.7366
Atxn7l3	0.000779948	0.0819434	0.479	0.272	11.4964
Casp8ap2	3.37674e-05	0.0819288	0.206	0.076	0.52093
Cox5a	0.00779002	0.0817431	0.607	0.408	104.659
Vldlr	4.61244e-05	0.0817055	0.377	0.187	0.709808
3222401L13Rik	5.28732e-05	0.0816827	0.097	0.019	0.812609
Abce1	0.0010643	0.0816012	0.447	0.259	15.5483
Dzip3	0.00672136	0.0815995	0.809	0.585	91.1618
Ssbp4	0.00649879	0.0815848	0.732	0.5	88.3705
Zfyve27	0.000840161	0.0815504	0.424	0.237	12.3487
Pip4k2a	0.000517002	0.0815102	0.23	0.111	7.69919
Itfg1	0.065827	0.0814761	0.778	0.617	702.835
Nell1	0.0348607	0.0814574	0.475	0.348	411.008
Cdk7	6.61507e-05	0.0814446	0.183	0.066	1.01442
Timmdc1	3.56414e-06	0.0813642	0.148	0.035	0.0556505
Zfp950	0.000315097	0.0813436	0.591	0.339	4.73464
Med23	7.65821e-05	0.0812892	0.171	0.06	1.17247
Lrrfip1	0.000191791	0.0811298	0.272	0.127	2.90256
Setd7	0.000147832	0.0811235	0.377	0.196	2.24439
Ric8b	0.00243201	0.0811026	0.486	0.297	34.5734
Mon2	0.000340144	0.0810964	0.424	0.231	5.10488
Ube2l3	0.00111979	0.0810589	0.743	0.497	16.3287
Ret	0.00112722	0.0810357	0.144	0.057	16.4292
Caprin2	0.000413288	0.0810111	0.101	0.028	6.17906
Atf6b	0.000886015	0.0809982	0.253	0.127	13.0032
Sorbs2	0.00192169	0.0809909	0.518	0.316	27.5301
Impact	0.0159402	0.0809129	0.996	0.956	203.732
Pms2	0.00062267	0.0807961	0.171	0.073	9.2317
Plxnb2	0.000940237	0.080785	0.304	0.165	13.7764
Gm42851	0.00140613	0.0807631	0.381	0.218	20.3552
Tmem131	0.00368862	0.0807628	0.358	0.212	51.5595
2900097C17Rik	0.0223561	0.0807501	0.992	0.93	278.087
Pomp	0.000883261	0.0807334	0.7	0.437	12.9636
Pkib	9.80897e-05	0.0807236	0.117	0.032	1.49744
Gm26724	0.0169844	0.0806661	0.241	0.149	216.177
Mocs3	1.03033e-05	0.0806644	0.093	0.013	0.160175
Otud6b	0.0120231	0.0806165	0.498	0.329	157.359
Zxdc	0.000837086	0.0805839	0.214	0.101	12.3043
Efna5	0.00597091	0.0805363	0.895	0.725	81.688
Nemf	0.00146254	0.0805101	0.451	0.259	21.1425
Arfgef3	0.0946067	0.0805006	0.942	0.759	947.296
Ggh	2.08139e-05	0.0804993	0.136	0.035	0.322365
Stc1	0.00439559	0.0804483	0.195	0.101	60.9537
Npr2	0.00317638	0.080445	0.296	0.168	44.7012
Ube2e1	0.00294843	0.0803691	0.693	0.453	41.6142
Fgd4	0.00277799	0.0803165	0.432	0.263	39.303
Mtdh	0.00626664	0.0802809	0.607	0.415	85.5021
Tmem199	0.000392588	0.0802373	0.416	0.228	5.87626
Plec	0.0017118	0.0802286	0.237	0.123	24.6157
Deptor	0.000415202	0.0802032	0.101	0.028	6.20685
Magi1	0.0148107	0.0800698	0.584	0.408	190.658
C130060K24Rik	0.0011955	0.0800587	0.082	0.022	17.3957
Cers4	0.00564397	0.0800461	0.817	0.633	77.4692
Mtcl1	0.000153238	0.0800453	0.257	0.117	2.32539
Sntg1	0.000618775	0.080026	0.237	0.114	9.1752
U2surp	0.00236207	0.0799553	0.623	0.392	33.6099
Lypla1	2.28745e-05	0.0799028	0.241	0.095	0.353915
Nr1d1	0.000632825	0.0798935	0.226	0.108	9.37214
Denr	0.0103849	0.0798078	0.716	0.491	137.247
Chchd7	0.00359155	0.0798033	0.358	0.209	50.2745
Slitrk4	0.0121129	0.0796813	0.292	0.18	158.412
Gtf2ird1	0.000359822	0.0795581	0.346	0.187	5.39301
Zcchc18	0.0698245	0.0795367	0.973	0.877	739.721
Rngtt	0.0031218	0.0795043	0.405	0.247	43.9456
Zfp281	0.00101925	0.0794312	0.307	0.165	14.9065
Zfp386	0.00147594	0.0794112	0.183	0.085	21.3288
Mecp2	0.0187228	0.0794033	0.696	0.478	236.432
Bax	0.00468802	0.0793876	0.533	0.342	64.8353
Ift74	0.000277668	0.0793718	0.16	0.06	4.1814
Gtf3c2	0.00251411	0.0793607	0.405	0.241	35.7004
Dhdh	3.21616e-05	0.0793063	0.156	0.047	0.496478
Abca1	0.000129112	0.0792581	0.097	0.022	1.96534
Gpatch4	0.0189799	0.0792001	0.366	0.247	239.469
Dscam	0.0478209	0.0790577	0.521	0.38	540.28
Tdrkh	0.000376326	0.0790196	0.296	0.149	5.63661
Nudt4	8.63593e-06	0.0790162	0.405	0.184	0.134358
Fam161b	0.00083124	0.0790021	0.226	0.111	12.2242
Cep250	0.00135008	0.078999	0.191	0.092	19.5626
Emc2	0.00018939	0.0789855	0.311	0.155	2.8668
Rbm4b	0.0318327	0.0789402	0.79	0.62	379.542
Etaa1	0.000384891	0.0789246	0.167	0.066	5.76258
Tle2	0.00127799	0.0789033	0.241	0.123	18.5514
Phf6	0.00178197	0.0788633	0.37	0.209	25.5802
Emc3	0.0046139	0.0788625	0.381	0.234	63.8518
Ahdc1	0.0132217	0.0788464	0.494	0.323	171.697
Foxk1	2.55871e-05	0.0788037	0.28	0.117	0.395602
Capn7	0.000765671	0.0787544	0.354	0.19	11.2936
Rpl13a-ps1	0.000114615	0.0787497	0.117	0.032	1.7473
Ptgds	2.08312e-05	0.078691	0.074	0.006	0.322612
Cir1	0.000933511	0.0786695	0.385	0.212	13.6806
Rbm15b	0.000952271	0.0785932	0.292	0.152	13.9489
Gnl2	0.000770534	0.0785275	0.307	0.161	11.3608
Nefh	0.000141846	0.078491	0.253	0.114	2.15478
Hsp90aa1	0.0161953	0.0784618	0.984	0.946	206.846
Clk4	0.00522747	0.0784452	0.362	0.222	71.9928
Lmbr1	0.00154937	0.078304	0.354	0.199	22.3528
Prpf40b	0.0018972	0.0782339	0.331	0.184	27.1869
Smim7	0.000887302	0.0781316	0.444	0.259	13.0203
Igsf9	4.21526e-05	0.0781292	0.198	0.073	0.64915
Samd4b	0.00016226	0.0780798	0.424	0.218	2.46051
9930104L06Rik	3.30104e-05	0.078002	0.156	0.047	0.509383
Ppp4r4	0.00052716	0.0779754	0.191	0.082	7.8473
Wipf2	0.00067457	0.0779518	0.451	0.259	9.97823
Cetn4	0.000569357	0.0778847	0.292	0.149	8.46236
1600014C10Rik	0.000440337	0.0777168	0.288	0.142	6.57776
Trappc13	0.000300849	0.077598	0.412	0.225	4.52657
Nsrp1	0.000247928	0.0775117	0.455	0.241	3.74222
Gmds	0.000186549	0.0774968	0.101	0.025	2.82454
Pno1	0.000134467	0.0774735	0.132	0.041	2.04564
Ftx	0.000324119	0.0774706	0.249	0.117	4.8673
Pnpt1	0.000223099	0.0774665	0.218	0.095	3.3717
Farsa	1.45429e-05	0.0774278	0.265	0.104	0.225691
Tmem108	0.0099996	0.077398	0.451	0.288	132.505
Lmo3	0.000616364	0.077381	0.097	0.028	9.14006
Add2	0.00300605	0.0773239	0.455	0.278	42.3853
Col4a1	2.98819e-05	0.0773036	0.121	0.028	0.461526
Rbm11	0.000593525	0.0771753	0.136	0.051	8.80969
Sgsm2	0.0034322	0.0771181	0.514	0.323	48.116
Tmem184b	0.000309823	0.0770851	0.206	0.089	4.65789
Setd3	0.0166874	0.0769917	0.603	0.408	212.748
Adcy3	0.000155915	0.0769566	0.35	0.174	2.36508
Odc1	0.00463493	0.0768722	0.634	0.443	64.1335
Dusp8	0.00093185	0.0768624	0.599	0.37	13.6581
Sec63	0.000603271	0.0768483	0.253	0.123	8.94953
Fmn2	0.000630665	0.0768331	0.471	0.269	9.34204
H3f3b	0.033441	0.0768296	0.984	0.886	396.543
Ehd4	0.000159783	0.0768215	0.191	0.076	2.42343
Sgpp1	0.00406188	0.0768097	0.584	0.367	56.5048
Naa35	0.000137094	0.0767874	0.529	0.285	2.08452
Ttc19	0.0050462	0.0767658	0.673	0.456	69.5972
Smim1	0.00277193	0.0767567	0.304	0.177	39.2229
Stxbp5l	0.000309521	0.0767491	0.459	0.25	4.65396
Mamld1	0.000321759	0.0766814	0.265	0.127	4.83314
Rps6kb1	0.0102327	0.0766645	0.553	0.37	135.368
Gprasp1	0.0124855	0.0766457	0.988	0.892	163.035
Gmpr	3.07347e-05	0.0765065	0.245	0.101	0.474636
Rnf19a	0.00153923	0.0764876	0.183	0.085	22.2127
Abcd4	0.000829767	0.0764466	0.214	0.101	12.2042
AC101921.1	0.000592642	0.0763423	0.121	0.041	8.79717
Grhl1	0.00109564	0.0763011	0.093	0.028	15.9898
Asxl2	0.00217274	0.0762861	0.424	0.247	31.0072
Lman2l	0.0105758	0.0762347	0.603	0.402	139.601
Sorl1	0.00467682	0.0762151	0.463	0.291	64.6851
Aak1	0.0112623	0.0761898	0.786	0.589	148.01
Camkk1	0.00267764	0.0761744	0.331	0.19	37.9341
Ehd3	0.00681045	0.0760854	0.494	0.32	92.2952
Eif3d	0.000544932	0.0760266	0.339	0.18	8.1075
Ubxn2b	0.000172362	0.0759774	0.339	0.165	2.61128
Fbxo30	4.75275e-05	0.0759488	0.117	0.028	0.731163
Hectd1	0.000767193	0.0759109	0.51	0.301	11.3138
Ptk2	0.000593901	0.075884	0.339	0.177	8.81467
Supt20	0.000693248	0.0757101	0.377	0.203	10.249
Hdac7	0.000623206	0.0757091	0.412	0.228	9.23778
Cul2	0.00139321	0.0756989	0.327	0.177	20.1737
Ube3c	0.00544551	0.0756939	0.498	0.316	74.8812
Acad8	0.00214671	0.0756911	0.109	0.041	30.64
Gm30025	0.000479575	0.0756878	0.156	0.06	7.15286
Chd9	0.00167648	0.0756389	0.529	0.316	24.1161
Fdx1	0.000958717	0.0756141	0.346	0.193	14.0404
Sobp	0.0102594	0.0755556	0.7	0.481	135.691
Maob	5.38277e-05	0.0754616	0.187	0.066	0.826902
Gstm5	0.00158247	0.0754246	0.389	0.225	22.8161
AI987944	0.000214722	0.0753279	0.163	0.06	3.24638
Gnptg	0.00163015	0.0753093	0.447	0.259	23.479
Rmi1	0.000457244	0.0753041	0.288	0.142	6.82757
Gm3448	5.68605e-05	0.0752923	0.152	0.047	0.873094
Copb2	0.000131945	0.0752399	0.233	0.101	2.00794
Tmc4	6.62102e-05	0.0751988	0.237	0.098	1.01527
Cog6	0.000156578	0.0751951	0.237	0.101	2.37497
Myo5a	0.00653713	0.0750985	0.759	0.532	88.8526
Cbfb	0.00346342	0.0750935	0.354	0.209	48.5364
Gls2	0.000169859	0.0749975	0.113	0.032	2.57438
Atf1	0.000509329	0.0749763	0.21	0.095	7.589
Gosr1	0.000147283	0.0748669	0.327	0.158	2.2362
Pitpnb	0.0111215	0.0748166	0.525	0.335	146.315
Pgd	0.000148083	0.074763	0.331	0.165	2.24805
Pomgnt1	0.000582866	0.074754	0.315	0.161	8.65731
Fbxo28	0.000596281	0.0747314	0.272	0.136	8.84941
Arsb	0.000698413	0.0746766	0.521	0.301	10.3226
Uhrf1bp1l	0.000878512	0.0746671	0.377	0.209	12.8983
Lrp3	0.000340767	0.0746416	0.397	0.212	5.11389
Clip1	0.00472195	0.0745902	0.681	0.443	65.2905
Timm10	0.000143649	0.074522	0.385	0.193	2.18174
Prdx3	0.00148174	0.0745214	0.412	0.247	21.4097
Hdgfl2	0.00173413	0.0744757	0.397	0.228	24.9247
Npat	0.00379651	0.0744606	0.14	0.063	52.9689
Smarcal1	0.000148634	0.074453	0.109	0.028	2.25626
Cdh15	0.00293583	0.0744138	0.148	0.066	41.448
Tmx2	0.036327	0.0744088	0.833	0.655	425.825
Polr2e	0.00164974	0.0744087	0.366	0.206	23.748
Rccd1	3.11703e-05	0.0743519	0.101	0.019	0.48127
Xndc1	3.48201e-05	0.0743376	0.167	0.054	0.536996
Uqcrh	0.0329676	0.0742342	1	0.975	391.687
Pfkfb3	0.00385701	0.0742128	0.163	0.079	53.7551
Pde2a	3.28374e-05	0.0740387	0.093	0.016	0.50678
Bhlhe40	0.00263266	0.0738794	0.187	0.092	37.3364
Ncl	0.0199309	0.0738492	0.86	0.636	250.313
Slit1	0.000537645	0.0738309	0.136	0.051	8.00069
Krba1	0.000280137	0.0738265	0.233	0.104	4.21774
Ptp4a2	0.0115708	0.0737524	0.755	0.563	151.821
Atf7	0.000358676	0.0736023	0.125	0.041	5.37727
Rgma	0.00601244	0.0735946	0.175	0.089	82.2201
Ndrg2	0.00094627	0.0733828	0.319	0.171	13.8619
Asl	0.000308773	0.0733681	0.132	0.044	4.64301
Snhg11	0.000163572	0.0733652	1	1	2.47992
Nufip1	0.000737702	0.0733262	0.125	0.044	10.8892
Kdm5c	0.000273318	0.0733137	0.335	0.168	4.11672
Nptn	0.0241438	0.0732614	0.774	0.595	298.006
Xpot	0.0183649	0.0732102	0.42	0.285	232.224
Taf10	0.00367117	0.0731675	0.362	0.215	51.3303
Gm10036	0.000233281	0.0731506	0.195	0.079	3.52464
Klc4	0.000337314	0.0731036	0.136	0.047	5.06409
Tcf12	0.000112419	0.0730987	0.272	0.123	1.71416
Sar1a	0.00988701	0.0730422	0.658	0.434	131.131
Zfp72	0.00030132	0.0730361	0.132	0.044	4.53336
Tulp3	8.60638e-05	0.0729344	0.214	0.085	1.31591
Parl	0.000881268	0.072923	0.245	0.12	12.9379
R3hdm1	0.00547544	0.0728929	0.872	0.699	75.2708
Aldh4a1	0.000289136	0.0728665	0.121	0.038	4.35207
Rap1b	0.000633964	0.0728394	0.405	0.218	9.38837
Haus7	3.08238e-05	0.0728194	0.101	0.019	0.475981
Hook1	0.00112786	0.072808	0.611	0.37	16.4374
Srsf4	7.40175e-05	0.0727976	0.3	0.136	1.13358
Rdh11	0.000341228	0.0727402	0.148	0.054	5.12012
Spata7	0.000256543	0.0726625	0.72	0.427	3.86919
Zfp788	0.00167271	0.0726535	0.3	0.161	24.0636
Usp42	0.000524179	0.0726406	0.163	0.066	7.80345
Cep162	0.000112394	0.0726205	0.233	0.098	1.7139
Fam199x	0.00126174	0.0726141	0.362	0.203	18.3256
Pds5a	0.000424197	0.0725459	0.389	0.206	6.33877
Tnrc6b	0.0062829	0.0725354	0.747	0.516	85.7113
Dhx33	0.00012125	0.0725182	0.117	0.032	1.84676
Usp30	0.00534383	0.0725101	0.288	0.168	73.5631
Gnal	0.00435907	0.0724129	0.389	0.241	60.4691
Ddx10	0.00265001	0.0723775	0.191	0.095	37.5665
Cpsf1	0.000258278	0.0723646	0.117	0.035	3.89432
Map2k5	0.000124683	0.0723523	0.198	0.079	1.8983
Gpd1l	0.00129031	0.0723243	0.37	0.209	18.7236
Exosc2	0.00525012	0.0723212	0.257	0.146	72.2994
Bach1	4.74013e-06	0.0722732	0.113	0.019	0.0739414
Scp2	0.00151196	0.072189	0.42	0.244	21.8297
Aifm2	0.00010916	0.0721486	0.086	0.016	1.66502
Cab39l	0.000411404	0.0720976	0.315	0.155	6.15131
Diaph3	0.000171819	0.0720731	0.148	0.051	2.60322
Cpox	0.00285625	0.0720413	0.409	0.237	40.3673
Zfc3h1	7.65198e-05	0.0719982	0.257	0.111	1.1716
Tmem38b	0.0013417	0.0719679	0.097	0.032	19.4452
Ptpra	0.00166625	0.0718931	0.584	0.345	23.9756
Tbc1d32	0.00116565	0.0718831	0.171	0.076	16.9754
Tekt1	0.000345891	0.0718637	0.132	0.044	5.18906
Nfkbia	0.00395513	0.0718357	0.249	0.136	55.0633
Hltf	0.00133927	0.0716704	0.198	0.095	19.4114
AI593442	0.00130277	0.0715323	0.49	0.294	18.898
Styx	0.000306907	0.0715075	0.109	0.032	4.61558
Ttc9c	0.00108291	0.0714568	0.296	0.155	15.8104
Mex3c	0.000146273	0.0714074	0.156	0.054	2.22115
Ddx6	0.0101804	0.0712773	0.724	0.503	134.697
Hipk2	0.000434524	0.0712707	0.304	0.152	6.49178
Bicd2	0.00120322	0.0712485	0.21	0.101	17.5056
Rnpepl1	0.00176593	0.0712299	0.249	0.13	25.3623
Rsph4a	0.00543308	0.071224	0.136	0.063	74.7157
Prelid3b	0.00183184	0.0712156	0.327	0.18	26.2759
Vps37a	0.000117083	0.0712064	0.339	0.168	1.78399
Rap1a	0.00155147	0.0711906	0.346	0.193	22.3784
Lmbrd1	0.00717293	0.0711862	0.65	0.449	96.8776
Yes1	0.000251707	0.0711598	0.128	0.041	3.79776
6030419C18Rik	0.00584152	0.0710492	0.381	0.231	80.0172
Esd	0.0367327	0.0709998	0.568	0.415	429.663
Myo10	0.0168473	0.0709446	0.187	0.108	214.617
St7l	0.0117625	0.0708583	0.265	0.158	154.182
Rab34	0.0149625	0.0708394	0.335	0.212	192.372
Arih1	0.000242268	0.0708108	0.424	0.228	3.65824
Man2c1	0.00128123	0.0707099	0.21	0.101	18.5958
Vps18	0.000145303	0.0706472	0.226	0.095	2.20671
Med7	0.000353752	0.0704349	0.136	0.047	5.30522
Mier3	0.000423379	0.0704315	0.202	0.089	6.32698
Vps13b	0.000142434	0.0704228	0.366	0.18	2.16357
Ica1l	0.000514038	0.0703885	0.339	0.174	7.65711
D17H6S53E	0.000476132	0.0703211	0.156	0.06	7.10294
Gabrq	0.0697961	0.0702828	0.708	0.576	739.489
Cds2	0.0283584	0.0702414	0.93	0.712	342.4
Vwa5b1	0.000773347	0.0702115	0.152	0.06	11.4007
Cbln2	0.684862	0.0701966	0.14	0.127	1651.89
Ptgr2	0.000169341	0.0701955	0.171	0.063	2.5667
Tmem159	0.000931907	0.0701851	0.148	0.06	13.658
Kdm7a	7.34269e-05	0.0700943	0.237	0.098	1.12468
Cwc22	0.0014588	0.0700527	0.113	0.041	21.0943
Cep164	0.000523838	0.0700519	0.409	0.225	7.7989
4930430F08Rik	0.000140538	0.0700351	0.253	0.114	2.13562
Dyrk1a	0.00422372	0.0699746	0.416	0.253	58.659
Terf1	0.00111148	0.0699514	0.198	0.092	16.212
Dpy19l4	0.00322615	0.0699332	0.412	0.244	45.3533
Gm5113	0.000272254	0.0699111	0.156	0.057	4.10204
Camk1	0.00667786	0.0698995	0.502	0.326	90.6186
Me1	0.000323057	0.0698727	0.3	0.146	4.85166
Saysd1	8.99636e-05	0.0698629	0.136	0.041	1.37455
Slmap	0.00152002	0.0698449	0.342	0.193	21.9445
Polr3c	0.000598391	0.069834	0.16	0.063	8.87953
Gm14703	0.000890854	0.0697074	0.101	0.032	13.0715
Zfp280b	4.6237e-05	0.0696972	0.237	0.095	0.711495
Csmd2	0.0011042	0.0696861	0.323	0.177	16.1114
Sdk2	0.00247874	0.0696326	0.401	0.241	35.208
Strn	0.00848619	0.0695549	0.257	0.152	113.503
Zfpm2	0.00101227	0.0695366	0.179	0.079	14.8075
Pcgf5	0.000929193	0.0695003	0.459	0.263	13.6229
Mrps14	0.00102707	0.0694537	0.634	0.377	15.0178
Rab1b	0.0133784	0.0694497	0.459	0.294	173.584
Slc35e3	0.000905864	0.069387	0.424	0.247	13.2863
Gga1	0.00336385	0.0693828	0.257	0.139	47.1982
Phf23	9.79918e-05	0.0693663	0.311	0.146	1.49604
Cox15	0.000603225	0.0693601	0.074	0.016	8.94944
Fbl	0.00268349	0.0693099	0.331	0.19	38.009
Mxd4	0.00324204	0.0692999	0.424	0.253	45.5572
Acsl4	0.00284641	0.0692927	0.385	0.228	40.2397
Cdc14a	0.000461584	0.0692838	0.101	0.028	6.8896
St8sia3	0.0131127	0.0692833	0.732	0.506	170.373
Gab3	0.000106321	0.0692456	0.093	0.019	1.62236
Slc12a7	0.00031016	0.069241	0.086	0.019	4.66233
Ppa1	0.00375362	0.0692216	0.366	0.218	52.4118
Ipo5	0.00562224	0.0692165	0.51	0.32	77.199
Slc7a5	0.000134809	0.0692081	0.206	0.082	2.05071
Gatad2a	0.000399252	0.0692076	0.253	0.12	5.9748
Pcyox1	0.00442393	0.0691628	0.591	0.37	61.3157
Fank1	0.000224969	0.0691333	0.113	0.032	3.39973
Zrsr1	0.0250287	0.0691112	0.494	0.348	307.752
Zfp976	0.00118643	0.0690999	0.093	0.028	17.2673
Rgs11	0.000306579	0.0690707	0.202	0.085	4.61095
Kdsr	9.65187e-05	0.0690452	0.506	0.266	1.47394
2900026A02Rik	0.000189826	0.0689663	0.148	0.051	2.87321
Psmd10	0.000453691	0.0689381	0.296	0.152	6.77587
Tmem2	0.000277293	0.0688337	0.144	0.051	4.17604
Dip2a	4.3846e-05	0.0688106	0.288	0.123	0.674922
Trmt2b	0.000166679	0.0688089	0.089	0.019	2.52652
Gpr158	0.000729425	0.0687991	0.335	0.177	10.7714
Fbxo9	0.00648144	0.0687823	0.689	0.475	88.1411
Mical3	0.000934806	0.0687132	0.607	0.367	13.6977
Plekha3	0.0151357	0.0686557	0.304	0.187	194.313
Rpl36al	0.0483252	0.0685954	0.926	0.794	545.301
mt-Nd5	0.0871727	0.0685492	0.965	0.886	886.546
Klhl5	0.000288092	0.068469	0.132	0.044	4.33694
Whrn	0.000420237	0.0684458	0.167	0.066	6.28128
Bex1	0.0309884	0.0684192	0.852	0.696	370.59
Ccdc136	0.00236234	0.0684127	0.405	0.237	33.6114
Cfap36	0.00652435	0.0683637	0.525	0.332	88.6986
Atxn7l1	0.00342017	0.0683418	0.276	0.155	47.9542
Dopey2	0.000930011	0.0683341	0.296	0.155	13.633
Zfp667	0.00112722	0.0683264	0.346	0.19	16.4303
Hs3st5	0.000873624	0.0683241	0.436	0.25	12.8292
Lrp11	0.000922025	0.0682824	0.482	0.282	13.5197
Vti1b	0.0424395	0.0682361	0.887	0.68	488.521
Vps50	0.00082639	0.0681616	0.514	0.288	12.157
Selenos	0.00339379	0.0681314	0.315	0.18	47.608
1190007I07Rik	0.00120607	0.0681155	0.136	0.054	17.5435
Rnf24	0.00629859	0.0681065	0.265	0.155	85.9128
Gm28884	0.000256182	0.0681001	0.074	0.013	3.8645
Ogfod2	0.00172666	0.0680513	0.191	0.092	24.8207
Krcc1	0.000608432	0.0679891	0.175	0.073	9.02426
Lsm3	0.000576038	0.0679568	0.339	0.18	8.55819
Snrpe	0.00591506	0.067941	0.669	0.437	80.9653
Srrm3	0.00203058	0.0679374	0.455	0.272	29.0372
Lgals8	0.00322324	0.0678964	0.385	0.228	45.3155
Rdh14	0.00130465	0.0678176	0.261	0.133	18.9239
Lmo1	0.000197563	0.0678001	0.082	0.016	2.98932
Creb1	0.00355476	0.0677883	0.346	0.203	49.7844
Cox7a2	0.0309274	0.0677061	0.922	0.747	369.985
Spcs3	8.06246e-05	0.0677011	0.323	0.152	1.23356
Pigx	0.00189369	0.0676828	0.206	0.101	27.1404
Fhod3	0.00612626	0.0676443	0.148	0.073	83.6909
Rgl2	0.00118117	0.067642	0.226	0.111	17.1919
Etfa	0.0024228	0.0676292	0.14	0.06	34.4498
Efl1	0.000256323	0.0675684	0.105	0.028	3.86637
Pdik1l	0.000310995	0.0675583	0.3	0.146	4.67456
Hinfp	0.00118712	0.0674822	0.183	0.082	17.2749
Trnt1	0.00133517	0.0674739	0.358	0.199	19.3546
Zfp825	0.000141158	0.0674651	0.07	0.009	2.14475
Smoc1	0.000628176	0.0674443	0.136	0.051	9.30643
Rrp36	0.000194251	0.0674116	0.113	0.032	2.9396
Slc25a30	0.00181334	0.0673856	0.167	0.076	26.016
Zfp62	0.000795312	0.0672792	0.202	0.092	11.7134
Gm3696	0.000257248	0.0672037	0.066	0.009	3.87956
Rnf31	0.000658292	0.0671922	0.121	0.041	9.74337
Lrrc20	0.000189186	0.0671786	0.136	0.044	2.86409
Rtcb	0.010671	0.0671397	0.607	0.405	140.783
Skiv2l2	0.000484651	0.0670877	0.233	0.108	7.22711
1600012H06Rik	0.000380858	0.0670148	0.113	0.035	5.70334
Hipk3	0.00256074	0.0670122	0.502	0.301	36.3497
Nubpl	0.000138514	0.0669701	0.07	0.009	2.10569
Nob1	0.00106333	0.0668777	0.276	0.146	15.5353
Pbrm1	0.00798098	0.0668691	0.817	0.579	107.049
Cyb5r4	0.00232693	0.0668491	0.226	0.117	33.1309
Chrm2	0.00265786	0.066834	0.082	0.025	37.6725
Exosc3	0.000358991	0.0668207	0.163	0.063	5.38163
Ap3m1	0.0021845	0.0668011	0.272	0.149	31.1707
Gm32856	6.54113e-05	0.0667274	0.089	0.016	1.00328
Arl5a	0.0267258	0.0667136	0.634	0.43	324.933
Zfp945	0.000700565	0.0666638	0.136	0.051	10.3537
Adck5	0.00011489	0.0665935	0.195	0.076	1.75139
Atp8b2	5.71049e-05	0.0665472	0.117	0.028	0.876731
Bmp1	0.000337652	0.0664475	0.097	0.025	5.0685
Mpnd	0.00429747	0.06643	0.362	0.218	59.6488
Rsbn1l	0.00179169	0.0663583	0.37	0.209	25.7161
Lin37	0.00157692	0.0663136	0.272	0.142	22.7391
Arid3a	8.84011e-05	0.0662617	0.136	0.041	1.35095
Ric1	0.00141715	0.0662374	0.156	0.066	20.5118
Exd2	0.00134234	0.0661537	0.222	0.111	19.4519
Gfpt1	0.000393441	0.0661416	0.638	0.364	5.88864
Hist1h4d	0.000496924	0.0661364	0.062	0.009	7.40565
Lsm8	0.000626386	0.0661243	0.249	0.12	9.28242
Samd4	0.00616371	0.0661168	0.44	0.266	84.1839
Homez	0.000261728	0.0661163	0.117	0.035	3.94555
Thyn1	0.000186203	0.0660668	0.304	0.146	2.81949
Slc39a1	0.00146924	0.0660201	0.128	0.051	21.2365
Coq4	0.00104485	0.0660107	0.226	0.111	15.2684
Csad	0.00368634	0.0660016	0.276	0.152	51.5314
Cntnap2	0.0903261	0.0659775	0.852	0.715	912.746
Fuca1	0.0163645	0.0659379	0.241	0.146	208.876
Rbm43	0.00114977	0.0658969	0.132	0.051	16.751
Reep5	0.0338144	0.0658468	0.973	0.832	400.397
Ghr	0.00549511	0.065787	0.117	0.051	75.5138
Glyr1	0.0296757	0.065712	0.747	0.528	356.079
Gtf2f2	8.50478e-05	0.0656823	0.132	0.038	1.30064
Stk38	0.00374255	0.0656762	0.307	0.177	52.276
Mrpl3	0.00209924	0.065637	0.35	0.199	29.9877
Ar	0.0137112	0.0655915	0.829	0.652	177.422
Tsc1	0.0120346	0.0655496	0.677	0.462	157.485
Tnfsf12	0.000883076	0.0655393	0.078	0.019	12.9627
Spag6l	0.000257284	0.0654938	0.14	0.047	3.87985
Eif1	0.0108813	0.0654894	1	1	143.35
Set	0.037943	0.0654619	0.981	0.892	441.885
Lpcat4	0.0012092	0.0654585	0.183	0.082	17.5841
Man2b1	0.00175568	0.0654361	0.261	0.136	25.2238
Ccng2	0.000297666	0.0654197	0.21	0.089	4.47988
Lgi2	0.00403653	0.0654182	0.148	0.07	56.1683
Pnn	0.0268899	0.0654014	0.724	0.509	326.685
Snw1	0.00364358	0.0653798	0.447	0.269	50.9809
Ralbp1	0.0344085	0.0653403	0.934	0.782	406.399
Guf1	0.00572192	0.0653214	0.409	0.253	78.4647
Tmem129	0.00226276	0.0653071	0.144	0.063	32.2647
Ltbp4	0.000165069	0.0652724	0.233	0.101	2.50244
Txlng	0.000988911	0.0652573	0.292	0.152	14.4717
Amt	0.000655616	0.0652219	0.187	0.082	9.70508
Galnt1	0.00143156	0.0652106	0.339	0.187	20.7147
Gm12258	0.000346452	0.0651914	0.148	0.054	5.19713
Pank4	0.000577814	0.0651783	0.16	0.063	8.58343
Ivd	0.000251788	0.0651366	0.28	0.13	3.79873
Cckar	4.05493e-05	0.0651176	0.078	0.009	0.624743
Tbc1d17	0.00369657	0.0650919	0.276	0.155	51.6633
Gpr22	0.00157014	0.0650715	0.206	0.101	22.6445
Sars2	0.00641965	0.065042	0.125	0.057	87.365
Drp2	0.00021166	0.0650055	0.377	0.196	3.20051
Irf2bp1	0.0195093	0.0649832	0.288	0.18	245.544
Htr2c	0.0268452	0.0649385	0.284	0.187	326.249
Zfp780b	0.00184927	0.064928	0.304	0.165	26.5111
Tmem8b	0.000788607	0.0649214	0.432	0.247	11.6185
Aifm1	0.000404757	0.0649108	0.152	0.057	6.05476
Cox7b	0.0101513	0.0649081	0.805	0.576	134.352
Sowahc	0.000122963	0.0648638	0.128	0.038	1.87261
Penk	0.00459201	0.0648422	0.401	0.253	63.5579
Rps18	0.00946765	0.0648337	1	1	125.854
Tram1	0.00270025	0.0647872	0.401	0.234	38.2382
Homer1	0.00931806	0.0647829	0.307	0.187	123.968
Tnip2	0.000695334	0.064708	0.136	0.051	10.2784
Nsun2	0.00184343	0.064693	0.272	0.146	26.4347
Gpr153	0.000910396	0.0646793	0.191	0.085	13.3519
Snx14	0.00261458	0.0646437	0.195	0.095	37.0904
Nup43	0.000136841	0.0645731	0.054	0.003	2.08081
Dcdc2a	0.000746529	0.0645342	0.136	0.051	11.0173
Ezr	0.00128571	0.0644827	0.171	0.076	18.6596
Rab9	0.00203921	0.064482	0.276	0.146	29.1566
Traf7	9.14955e-05	0.0644542	0.175	0.063	1.39778
Txndc11	0.0014503	0.0644348	0.307	0.165	20.9742
Pigs	0.00130091	0.064393	0.342	0.19	18.8722
BC051226	0.00114155	0.0643804	0.198	0.092	16.6346
Slc19a2	0.00114719	0.064319	0.136	0.054	16.7145
Rnf152	0.00020724	0.0643176	0.214	0.092	3.1345
Caml	0.00211286	0.0643056	0.292	0.158	30.1737
Zfp746	0.0014597	0.0643015	0.218	0.108	21.1044
Trip11	0.0158659	0.0643001	0.463	0.297	202.83
Iqgap1	0.000729726	0.0642863	0.175	0.076	10.7751
Rrp1b	0.000830619	0.0642795	0.14	0.054	12.2159
Bend7	0.000243325	0.0642487	0.183	0.073	3.67373
Sh3bgrl	0.00172236	0.0642255	0.389	0.225	24.7606
Got1	0.0185156	0.0642107	0.591	0.402	234.018
Zkscan2	0.000337344	0.0641595	0.187	0.076	5.06422
Reck	6.75247e-05	0.0641578	0.058	0.003	1.03515
Bloc1s5	0.000160163	0.0641482	0.198	0.079	2.42903
Ttpal	0.000569738	0.0641302	0.307	0.155	8.46744
Cep104	0.00113069	0.0640759	0.272	0.139	16.4775
Decr2	0.000688943	0.0640694	0.23	0.108	10.1867
Pik3ip1	0.00232196	0.0640112	0.28	0.152	33.074
Cdh8	0.00732665	0.0639066	0.385	0.237	98.8145
Dlat	0.00554239	0.0638141	0.451	0.285	76.1469
B130006D01Rik	0.000827603	0.0638135	0.14	0.054	12.174
Fam53b	0.00159064	0.0637756	0.14	0.057	22.9307
Rab36	0.00466063	0.063739	0.525	0.32	64.4752
Wtap	0.0233267	0.0637134	0.568	0.364	288.948
S100pbp	0.00135707	0.0637115	0.49	0.282	19.6612
Med21	0.00550036	0.0636169	0.393	0.241	75.5804
4931406C07Rik	0.000414162	0.0635783	0.163	0.063	6.19172
Ckap5	0.00429144	0.063567	0.397	0.234	59.5738
Cmtm3	7.00976e-05	0.0635232	0.058	0.003	1.07417
Dnajc19	0.00471256	0.0635171	0.494	0.307	65.1653
Pappa	0.0111772	0.063461	0.105	0.047	147.013
Cd2bp2	0.00230878	0.0634509	0.323	0.18	32.8909
Ythdc2	0.000133613	0.0634379	0.304	0.142	2.03306
Dync2h1	0.00491536	0.0634364	0.49	0.301	67.8615
D230017M19Rik	0.000670019	0.0634298	0.109	0.035	9.91293
Ccdc66	0.00211351	0.0634085	0.245	0.13	30.1788
Tapbpl	0.000242354	0.0633468	0.128	0.041	3.6593
Znhit6	0.0013673	0.0633048	0.276	0.142	19.8054
Dcp1b	0.000735469	0.0632967	0.136	0.051	10.857
Utp3	0.000602834	0.0632063	0.327	0.168	8.94425
Lbhd2	0.000370374	0.0632045	0.245	0.117	5.54894
Cnpy4	0.00127168	0.0631969	0.082	0.022	18.4622
Cspg5	0.034192	0.0631895	0.778	0.582	404.115
Lamp2	0.000547901	0.0631502	0.191	0.082	8.15113
Lig1	0.0018019	0.0630909	0.144	0.06	25.8554
Myg1	0.000734043	0.0630874	0.253	0.123	10.8367
Nek9	0.000256533	0.0630775	0.191	0.079	3.86929
Csgalnact1	0.000399361	0.063075	0.089	0.022	5.97604
Tmem185a	0.00209761	0.062979	0.272	0.146	29.9685
Mettl5	0.00124762	0.0629547	0.121	0.044	18.1292
Gna11	0.0113951	0.0628639	0.634	0.415	149.618
Rnf170	0.00345063	0.0628536	0.44	0.263	48.364
Scrt1	0.000313539	0.0627385	0.175	0.07	4.7125
Rassf4	0.000785001	0.0627257	0.066	0.013	11.5701
Tmem164	0.00221163	0.0626746	0.136	0.057	31.5445
Chchd3	0.00643778	0.0626278	0.245	0.139	87.5924
Phyh	0.000262597	0.0626167	0.261	0.123	3.95813
Dis3l2	0.000435633	0.0626133	0.198	0.085	6.50793
Ipmk	0.0014751	0.0625835	0.3	0.158	21.3181
Id4	0.0380972	0.0625482	0.732	0.554	443.451
B230354K17Rik	0.000921255	0.062531	0.175	0.076	13.5093
Slc37a3	0.00132693	0.0625211	0.156	0.066	19.2378
Mtx3	0.00442904	0.0624988	0.218	0.117	61.3777
Tsen2	0.00229831	0.0624766	0.14	0.06	32.7578
Mbd5	0.00130929	0.0624416	0.455	0.263	18.9861
Mrm3	0.000787032	0.0624301	0.152	0.06	11.5961
Sfswap	0.00260685	0.0624266	0.35	0.199	36.9834
Ncoa3	0.000749176	0.0624251	0.163	0.066	11.0556
Tmtc2	0.00274182	0.0624013	0.163	0.076	38.8132
St3gal2	0.00160049	0.062397	0.37	0.206	23.0694
Sox5	0.000299277	0.0623471	0.327	0.161	4.50352
Bbs7	6.52168e-05	0.0623427	0.163	0.054	1.00036
Ccdc88a	0.0379658	0.0623116	0.677	0.484	442.074
Slitrk1	0.0150593	0.0622898	0.595	0.405	193.497
Uxs1	0.00349944	0.0622861	0.276	0.155	49.0272
Zfp282	0.00349014	0.062277	0.121	0.051	48.9003
Serpinb6a	0.000400363	0.0622468	0.191	0.079	5.99064
Efemp1	0.00381844	0.0622111	0.062	0.016	53.2519
Nfrkb	0.000919493	0.06218	0.195	0.089	13.4844
Srprb	0.00377536	0.0621192	0.389	0.231	52.6926
Rps12-ps3	0.00355032	0.0621125	0.121	0.051	49.7258
Utrn	0.000446169	0.0620868	0.156	0.06	6.66398
Brd8	0.0258296	0.0620818	0.584	0.383	316.465
Desi1	0.000614716	0.0620571	0.339	0.177	9.11686
Zfp771	0.000355513	0.062055	0.366	0.187	5.33092
E2f3	0.00108448	0.0620087	0.132	0.051	15.8323
Fam160a2	0.0112372	0.0619725	0.331	0.199	147.702
Mtif2	0.0026062	0.061965	0.268	0.146	36.9767
Pygb	0.00330751	0.0618976	0.385	0.225	46.4375
Rnd2	0.00762602	0.0618799	0.494	0.316	102.631
Plppr4	0.0272881	0.0618372	0.833	0.642	330.949
Gm45495	0.000231969	0.0617451	0.152	0.054	3.50506
Aktip	0.0673386	0.0616837	0.735	0.538	716.685
Ppp2r5a	0.00243078	0.0616692	0.14	0.06	34.5584
Ppig	0.0381496	0.0616203	0.891	0.696	443.985
Adal	0.000933916	0.0615837	0.156	0.063	13.6856
H2afv	0.00951426	0.0615616	0.494	0.31	126.445
Trmt13	0.000723548	0.0615415	0.241	0.117	10.6868
Med9	0.00446155	0.0615185	0.241	0.133	61.8148
Pcf11	0.0199429	0.0615036	0.335	0.218	250.443
Syndig1	0.0108315	0.0613549	0.175	0.095	142.759
Mbtps1	0.00230366	0.0613179	0.381	0.218	32.8248
Mcmdc2	0.000517348	0.0612969	0.128	0.044	7.70382
Ubxn1	0.000719886	0.0612828	0.451	0.25	10.6334
Lrp10	0.000494217	0.0612721	0.128	0.044	7.3668
Sall1	0.000758749	0.0611964	0.086	0.022	11.1953
Cidea	0.000280586	0.0611589	0.066	0.009	4.22423
Ralb	0.000930866	0.0610963	0.237	0.114	13.6446
Zfp652	0.000165474	0.0610817	0.23	0.098	2.50842
Vps8	0.00058257	0.0610762	0.132	0.047	8.65349
Wdyhv1	0.00133816	0.0610649	0.14	0.057	19.3967
Cep290	0.00192135	0.0610594	0.319	0.177	27.5272
Atr	0.00234989	0.0610572	0.249	0.13	33.4436
Nat8f1	0.00441364	0.0610129	0.128	0.057	61.1862
BC005624	0.00410283	0.0610105	0.467	0.288	57.0457
Nme7	0.00162771	0.0609629	0.16	0.07	23.4456
Satb1	0.00540044	0.0609267	0.132	0.06	74.2885
Epc2	0.000875757	0.0609083	0.405	0.225	12.8587
Vamp4	0.0262534	0.0609018	0.603	0.427	321.053
Bcl2l13	0.00250242	0.0608696	0.226	0.117	35.5394
Kpna3	0.00890611	0.06086	0.63	0.421	118.745
Tpp2	0.00873001	0.0608542	0.3	0.177	116.554
Tyw1	0.000871998	0.0608316	0.125	0.044	12.807
Gm48855	0.000968558	0.060827	0.179	0.079	14.1826
Prmt6	0.00073086	0.0608197	0.183	0.079	10.7911
Ccdc127	0.00118665	0.0607534	0.401	0.225	17.2692
Bag4	0.0420063	0.0607364	0.549	0.392	484.038
Ubxn10	0.0002112	0.0607224	0.082	0.016	3.19376
Bclaf3	0.000120249	0.0606455	0.214	0.085	1.83199
Sqle	0.001794	0.0606406	0.319	0.174	25.7475
Rara	7.12946e-05	0.0606308	0.109	0.025	1.09223
Mkl1	0.00232398	0.0606262	0.156	0.07	33.0959
Washc4	0.000556973	0.0606195	0.339	0.177	8.28275
Mrto4	0.00204807	0.0606121	0.307	0.168	29.2751
B2m	0.00291387	0.0606018	0.097	0.035	41.1497
Tdrd7	0.00120499	0.0605187	0.105	0.035	17.5302
Aldh6a1	0.00287655	0.0605172	0.268	0.146	40.6457
Ubxn7	0.00657106	0.0605048	0.366	0.225	89.2744
Kmt2e	0.00755303	0.060498	0.84	0.579	101.702
Ooep	0.000139922	0.0604885	0.054	0.003	2.12668
Tmem192	0.00237351	0.060481	0.374	0.212	33.7631
Wdr61	0.00289775	0.0604728	0.249	0.133	40.9307
Carmil1	0.000767494	0.060442	0.171	0.073	11.3175
Bud23	0.00130869	0.0603659	0.28	0.149	18.9786
Pdcl3	0.00213504	0.0603363	0.444	0.266	30.4798
Ppp1r16a	0.0014501	0.0603225	0.268	0.142	20.9729
Prps2	0.000586225	0.0602502	0.171	0.073	8.70543
Tbc1d5	0.00396443	0.0602098	0.16	0.076	55.1849
Tbce	0.00413681	0.060132	0.385	0.228	57.4934
Ap3d1	0.0143173	0.0601124	0.502	0.329	184.822
Inpp4b	0.0519226	0.0601069	0.175	0.111	581.222
Carmil3	0.00411937	0.0600744	0.409	0.244	57.2674
Map2	0.0189727	0.0600199	0.973	0.886	239.398
Rtca	0.00124855	0.0599711	0.261	0.133	18.1415
Myrip	0.00289413	0.0599594	0.179	0.085	40.8825
L2hgdh	0.0017356	0.0599575	0.237	0.12	24.9441
Vamp7	0.0099644	0.0599502	0.358	0.218	132.068
Cacna1a	0.0678889	0.059815	0.603	0.437	721.727
Erbin	0.000628993	0.0597271	0.175	0.073	9.3179
Dnajc7	0.00472319	0.0597258	0.658	0.44	65.3028
Spryd3	0.00858188	0.0597249	0.642	0.421	114.714
Slc30a7	0.00035909	0.0597169	0.16	0.06	5.38277
Opa1	0.0121058	0.0596884	0.49	0.32	158.344
Prmt3	0.0008151	0.0596841	0.222	0.104	11.9942
Tcaim	0.00413492	0.0596629	0.226	0.12	57.4712
Wwox	0.0133716	0.0596266	0.167	0.092	173.51
Dopey1	0.00363816	0.0595932	0.502	0.301	50.9088
Scd1	0.000430265	0.0595665	0.089	0.022	6.42902
Fam124a	0.00152143	0.0594012	0.175	0.079	21.9634
Med8	0.00744943	0.0593918	0.276	0.161	100.374
Clpx	0.000768899	0.0593233	0.198	0.089	11.3374
Socs5	0.00730553	0.0593156	0.447	0.282	98.5369
Twsg1	0.00103174	0.0593124	0.198	0.092	15.0831
Polr2j	0.017233	0.0592452	0.541	0.342	219.065
Manea	0.00754992	0.0591968	0.257	0.149	101.667
Rab8b	0.00461021	0.0591955	0.346	0.203	63.8054
Uchl3	0.0192121	0.0591175	0.315	0.199	242.149
Fam76b	0.000495563	0.0590852	0.171	0.07	7.38637
Igbp1	0.000701773	0.0590718	0.233	0.111	10.3701
Cystm1	0.000661476	0.059067	0.319	0.165	9.78853
Dnttip2	0.00126908	0.0590562	0.148	0.06	18.4258
Donson	0.00120547	0.0590503	0.132	0.051	17.536
Pcnt	0.00230502	0.0590454	0.121	0.047	32.8419
Cap1	0.0036564	0.0590387	0.105	0.041	51.1421
Bcl2l2	0.00107839	0.0590322	0.389	0.215	15.7456
Xrcc5	0.00511377	0.0589949	0.152	0.073	70.4831
Cd82	8.50478e-05	0.0589555	0.132	0.038	1.30055
Tbc1d24	0.0184074	0.0589446	0.576	0.38	232.707
Nmd3	0.000340128	0.0588564	0.3	0.146	5.10498
Spag1	0.000707789	0.0588301	0.183	0.079	10.4576
Adipor1	0.00539509	0.0588282	0.358	0.212	74.2202
Hnrnpa3	0.0361102	0.058751	0.953	0.759	423.934
Tbc1d22a	0.000770636	0.0587256	0.152	0.06	11.3615
Pi4ka	0.00574599	0.0586919	0.549	0.339	78.7718
Srsf6	0.0237851	0.0586323	0.607	0.424	294.031
Tfcp2	0.00107322	0.0585934	0.268	0.136	15.6744
Slc25a39	0.00442594	0.0585788	0.358	0.212	61.3391
Ranbp17	0.000660892	0.0585661	0.074	0.016	9.78119
Etf1	0.00405201	0.0585619	0.545	0.326	56.3756
Atp5h	0.12357	0.0585253	0.84	0.674	1133.76
Rpl10-ps3	0.0109198	0.0584902	0.607	0.399	143.825
Ankrd44	0.00596844	0.0584714	0.214	0.117	81.6602
Vat1	0.132211	0.0584684	0.907	0.744	1194.53
Rc3h2	0.0229871	0.0584521	0.603	0.421	284.994
Timm29	0.0381918	0.0584374	0.44	0.307	444.4
Snapc1	0.000801677	0.0584013	0.463	0.266	11.8047
Atg16l1	0.0023366	0.058328	0.327	0.18	33.2661
Rbm22	0.00173105	0.0583063	0.237	0.12	24.8822
Fbxo17	7.53407e-05	0.0583005	0.082	0.013	1.15362
Brms1	0.00117292	0.0582766	0.082	0.022	17.0765
Wdr33	0.0040228	0.0582723	0.179	0.089	55.9853
Itih5	0.0370815	0.0582453	0.093	0.047	433.26
Pkp4	0.00876001	0.0582431	0.471	0.301	116.946
Prickle2	0.0243008	0.0582284	0.533	0.377	299.678
Polr3a	0.00031426	0.0582013	0.222	0.098	4.72301
Zfp449	0.000828384	0.0581569	0.136	0.051	12.1847
Tra2b	0.0618828	0.0581521	0.798	0.598	667.592
Taf1a	0.000383739	0.0581376	0.089	0.022	5.74573
Pycard	0.00126735	0.0581343	0.093	0.028	18.4032
Plpp7	0.00243543	0.0581161	0.125	0.051	34.6197
Dgkz	0.000862127	0.0580514	0.307	0.161	12.6672
Coa7	0.00435457	0.0580484	0.14	0.063	60.4109
Dennd5b	0.0149487	0.0580385	0.755	0.528	192.211
Ccdc82	0.00298307	0.058022	0.339	0.193	42.0851
Knop1	0.00130633	0.0579867	0.444	0.253	18.947
Polr3k	0.0011175	0.0579636	0.424	0.241	16.2976
2510002D24Rik	0.00547989	0.05794	0.436	0.263	75.321
Atpaf1	0.00126022	0.0579236	0.202	0.095	18.3048
Bnip1	0.000631085	0.0579143	0.175	0.073	9.34699
Stxbp4	0.00371842	0.05789	0.183	0.092	51.9538
Arap2	0.000657362	0.0578808	0.074	0.016	9.73028
Plgrkt	0.000622805	0.0578804	0.237	0.111	9.23308
Ppp1r7	0.00384981	0.0578595	0.284	0.158	53.6625
Scml4	0.000433812	0.0578564	0.358	0.184	6.48158
Rnf7	0.0492762	0.0578469	0.805	0.63	554.604
1700112J16Rik	0.000796343	0.0578381	0.086	0.022	11.7277
Sfmbt1	0.00184183	0.0578329	0.268	0.142	26.4136
Slc8a3	0.00491251	0.0578267	0.237	0.13	67.827
Zfp605	0.000834504	0.0578172	0.113	0.038	12.2705
D1Ertd622e	0.00287995	0.0577926	0.342	0.199	40.6908
Gtf2h2	0.000368696	0.0577646	0.121	0.038	5.52417
Zfp866	0.000257284	0.0577568	0.14	0.047	3.87959
Zfp975	0.000979447	0.0577397	0.101	0.032	14.3362
Il6st	0.0030173	0.0577394	0.331	0.19	42.5409
Kdm2b	0.000685179	0.0577107	0.245	0.12	10.1317
Ttc28	0.00184789	0.0577063	0.163	0.073	26.4932
Rassf8	0.026438	0.0576713	0.467	0.316	321.856
Tgfbr1	0.00228103	0.0576277	0.152	0.066	32.5184
Fkbp5	0.00582794	0.0576182	0.183	0.095	79.8428
Hmbs	0.00263832	0.0575908	0.14	0.06	37.414
Lztr1	0.0012555	0.0575814	0.237	0.117	18.2399
Dctn4	0.0306681	0.0575755	0.708	0.506	367.128
Lsamp	0.0967184	0.0575685	0.938	0.867	964.669
Msl3	0.00199504	0.0575505	0.117	0.044	28.5471
Pdia3	0.0469339	0.0575314	0.584	0.408	532.699
Eaf1	0.000759466	0.0574632	0.183	0.079	11.2036
Cept1	0.00109499	0.0574625	0.354	0.193	15.9814
Cldnd1	0.0400092	0.0574587	0.521	0.358	463.107
Baz2b	0.00434717	0.0574421	0.335	0.193	60.317
Snta1	0.000458984	0.0574143	0.113	0.035	6.85309
Abhd18	0.00429691	0.0573986	0.479	0.301	59.6454
Ash1l	0.0534711	0.0573969	0.79	0.585	596.523
Ewsr1	0.0225037	0.0573894	0.728	0.519	279.721
Ints3	0.00441217	0.0573819	0.315	0.18	61.1703
Fam13c	0.000693386	0.0573636	0.237	0.114	10.2503
Zfp873	0.00294646	0.0573146	0.128	0.054	41.5923
Akap8l	0.00101798	0.0572443	0.56	0.326	14.889
Eif4enif1	0.00344938	0.057218	0.28	0.155	48.3499
Tbc1d1	0.00416629	0.0571362	0.125	0.054	57.8864
Csnk1g1	0.00201631	0.057121	0.366	0.209	28.8433
Gtf3c1	0.000821839	0.0570371	0.327	0.171	12.0917
Mcee	0.00171771	0.0570158	0.311	0.168	24.6972
Zfp592	0.00446461	0.0570061	0.125	0.054	61.8527
Braf	0.0116472	0.0570005	0.401	0.247	152.753
Rap2c	0.00385283	0.0569676	0.253	0.136	53.7008
Gdi2	0.1594	0.0569635	0.821	0.623	1375.46
Elp2	0.000522848	0.0569349	0.362	0.19	7.78469
Chfr	0.00378733	0.056934	0.374	0.225	52.8446
Ginm1	0.0237925	0.056919	0.187	0.111	294.075
Eprs	0.00383118	0.0568915	0.358	0.212	53.4219
Zfp408	0.00112043	0.0568642	0.07	0.016	16.337
Zbtb4	0.000310057	0.0568636	0.401	0.212	4.66108
Gtf2b	0.00423929	0.0568523	0.16	0.076	58.8626
Srsf12	0.0169144	0.0568027	0.393	0.247	215.388
Traip	0.000129914	0.0567435	0.156	0.054	1.97729
Rad23b	0.0312312	0.056731	0.798	0.649	372.963
Eef1e1	0.00380437	0.0567186	0.494	0.31	53.0634
Zfp84	0.00362072	0.0567154	0.086	0.028	50.6683
Tmem186	0.000456579	0.0566542	0.191	0.079	6.8181
Megf9	0.0094595	0.0566478	0.354	0.222	125.755
Mbd1	0.00765873	0.0566386	0.296	0.174	103.002
Polr3e	0.00232413	0.0566324	0.214	0.108	33.0956
Dctn5	0.00195805	0.0566231	0.416	0.244	28.0256
Tbca	0.0859176	0.0566097	0.922	0.807	877.305
Gle1	0.00330018	0.0565798	0.412	0.247	46.3478
BC030500	0.00117415	0.0565701	0.374	0.209	17.0921
Zfp202	0.000759052	0.056568	0.097	0.028	11.1983
Ppif	0.00595403	0.0565168	0.163	0.082	81.4691
Dmxl1	0.00116795	0.0564778	0.393	0.222	17.0066
Zfp146	0.000278509	0.0564519	0.058	0.006	4.19379
Rprd1a	0.016698	0.0564408	0.615	0.421	212.866
Sf3b6	9.7172e-05	0.0564366	0.424	0.215	1.48372
Fbn2	0.000250286	0.0564331	0.074	0.013	3.77681
Pik3c2a	0.0160267	0.0564304	0.233	0.139	204.773
Radil	0.000591641	0.0563828	0.132	0.047	8.7835
Hs2st1	0.018624	0.0563394	0.533	0.354	235.277
Dexi	0.00247342	0.0563018	0.424	0.247	35.1374
Cops8	0.0174506	0.0562566	0.642	0.427	221.571
Tmem150c	0.00204047	0.0562316	0.276	0.149	29.1726
Kif3a	0.0487837	0.0562244	0.759	0.566	549.792
Pstk	0.00119914	0.0561797	0.444	0.25	17.4475
Gem	0.00383743	0.0561793	0.062	0.016	53.5052
Nol11	0.000975388	0.0561207	0.28	0.146	14.2797
Sart3	0.00434745	0.0561097	0.222	0.117	60.3165
Ltbp3	0.00184619	0.0561006	0.241	0.123	26.4725
Sgsm3	0.000239955	0.0560677	0.23	0.101	3.62356
Crtc2	0.000983341	0.0559882	0.128	0.047	14.3922
Kcnh5	0.00164749	0.0559831	0.074	0.019	23.7188
Stxbp2	3.68155e-05	0.0559589	0.249	0.101	0.567622
Sphk2	0.00125875	0.0559028	0.136	0.054	18.2846
Greb1	0.00735864	0.0559012	0.074	0.025	99.2166
Htatip2	0.00199744	0.0558998	0.163	0.073	28.5794
Glce	0.00392771	0.055881	0.358	0.206	54.7052
Hmbox1	5.61535e-05	0.0558726	0.276	0.12	0.862349
Mia2	0.00395804	0.0558718	0.233	0.127	55.0998
Flot1	0.000900264	0.0558538	0.346	0.187	13.2069
Gmpr2	0.000929707	0.0558465	0.214	0.101	13.6295
Orai3	0.00319409	0.0558158	0.113	0.044	44.9377
Pck2	9.76913e-05	0.055813	0.261	0.111	1.49155
Pnrc2	0.000928	0.0558059	0.401	0.228	13.6063
mt-Atp6	0.00234864	0.0557911	1	1	33.4282
Zfp81	0.000515167	0.0557749	0.187	0.079	7.6729
Mettl1	0.00212695	0.055756	0.214	0.108	30.3686
A330008L17Rik	0.00258245	0.0556987	0.109	0.041	36.6476
Chmp7	0.00854157	0.0556559	0.432	0.269	114.218
Kdm6a	0.00100707	0.0555744	0.257	0.127	14.7345
Pcdhb3	0.000785001	0.0555588	0.066	0.013	11.5694
Ppp2r3d	0.0013418	0.0555375	0.276	0.142	19.4453
S100a10	0.0030292	0.0554822	0.148	0.066	42.6996
Svip	0.00309491	0.0554754	0.475	0.282	43.5887
Uspl1	0.00139854	0.0554681	0.261	0.133	20.2481
Mkrn2	0.00230146	0.0554489	0.167	0.076	32.8005
Acot11	0.00159182	0.0554082	0.074	0.019	22.9461
Gm48715	0.0148672	0.0553441	0.093	0.041	191.281
Actr10	0.0224387	0.0553391	0.603	0.421	279.025
Hint1	0.0387035	0.0553195	0.977	0.899	449.812
Arhgap17	0.00186522	0.0552434	0.113	0.041	26.738
Brwd1	0.0470084	0.0552339	0.588	0.421	533.31
Eif3i	0.00379894	0.0552072	0.65	0.411	52.999
Plekhh3	0.000149368	0.0551333	0.062	0.006	2.26726
Mmp15	0.00990742	0.0550674	0.101	0.044	131.372
Hjurp	0.00264963	0.0550543	0.366	0.209	37.5638
Polr2b	0.00342562	0.0550225	0.218	0.111	48.0272
Trappc2	0.0190758	0.055012	0.432	0.282	240.622
Smndc1	0.00252166	0.0549351	0.331	0.187	35.8026
2610001J05Rik	0.0228961	0.0549107	0.28	0.177	284.026
Tpm3-rs7	0.000563731	0.0548737	0.082	0.019	8.38099
Bnip3l	0.0571014	0.054771	0.549	0.405	625.146
Nup88	0.00117074	0.0547363	0.284	0.146	17.046
Tbl3	0.00808961	0.0546806	0.156	0.079	108.401
Ppp2r2a	0.0192409	0.0546736	0.541	0.358	242.455
4933407L21Rik	0.00162211	0.0546719	0.097	0.032	23.3665
Zfand2b	0.00109885	0.0546497	0.148	0.06	16.0345
Nkx6-2	5.36047e-05	0.0546424	0.051	0	0.823583
4932443I19Rik	0.00124186	0.0546022	0.082	0.022	18.0467
Zfr2	0.0029856	0.0545465	0.21	0.108	42.1179
Dus2	0.0048611	0.0545408	0.148	0.07	67.1415
P2rx5	0.00383823	0.0545384	0.035	0.003	53.5126
Armc9	0.00166172	0.0544873	0.346	0.19	23.9122
Qrsl1	0.00639232	0.0544543	0.117	0.051	87.1146
Tnfaip8l3	0.000660892	0.0544135	0.074	0.016	9.78053
1810044D09Rik	0.00208418	0.0543917	0.066	0.016	29.783
Mre11a	0.00126735	0.0543689	0.093	0.028	18.4019
Tyms	0.00718393	0.0543514	0.144	0.07	97.0189
Rchy1	0.0086912	0.0543424	0.661	0.427	116.062
Uba3	0.00295263	0.0542948	0.436	0.256	41.6675
Klf2	0.000139922	0.0542785	0.054	0.003	2.12654
Fam120b	0.0072635	0.0542119	0.588	0.367	98.0209
Anks3	0.000562329	0.0542058	0.319	0.168	8.36071
Tmed5	0.00623611	0.0541932	0.261	0.146	85.1167
Hmgcl	0.00234465	0.0541787	0.179	0.085	33.3761
Scap	0.00662161	0.0541613	0.226	0.123	89.9149
Rbm15	9.68204e-05	0.054134	0.187	0.07	1.47845
Ndufaf7	0.0078492	0.0540994	0.268	0.155	105.407
Pdss2	0.00120659	0.0540432	0.16	0.066	17.5499
Asb6	0.000492378	0.0539904	0.14	0.051	7.34037
Ddx56	0.00230502	0.0539442	0.121	0.047	32.8396
Pick1	0.00781036	0.0539415	0.3	0.174	104.917
Heatr1	0.0010093	0.0539337	0.101	0.032	14.7661
4930452B06Rik	0.00088318	0.0538934	0.101	0.032	12.9633
Chrd	0.00125627	0.0538469	0.093	0.028	18.2499
Impdh2	0.00161708	0.0538258	0.315	0.171	23.2956
Gm3739	0.000588791	0.0537979	0.093	0.025	8.74237
Ryk	0.0026973	0.0537975	0.23	0.117	38.1991
Txndc9	0.000836576	0.0537841	0.459	0.256	12.2977
Bmpr1a	0.0149956	0.0537442	0.261	0.158	192.709
Ddx28	0.000848917	0.0537314	0.097	0.028	12.4757
Stk32c	0.00302393	0.0537248	0.366	0.209	42.6284
Ehbp1	0.00842138	0.0537177	0.307	0.18	112.703
Rprm	0.0433839	0.0537144	0.233	0.158	497.483
Cbx7	0.00414657	0.0537036	0.179	0.089	57.6249
Phlpp1	0.00496529	0.0536969	0.171	0.085	68.521
Nicn1	0.00589015	0.0536435	0.696	0.468	80.6539
Eif3g	0.00246737	0.0536411	0.397	0.234	35.0564
Fam117a	0.00105513	0.0536408	0.051	0.006	15.4164
Thap2	0.0106141	0.0536375	0.502	0.326	140.084
Ranbp2	0.00116644	0.0536359	0.253	0.127	16.9857
Zfp958	0.000788688	0.0535752	0.086	0.022	11.619
Msra	0.000766134	0.0535641	0.086	0.022	11.2997
Stim2	0.00958657	0.0535513	0.284	0.174	127.358
Elmsan1	0.0030306	0.0534168	0.097	0.035	42.7132
Trappc11	0.0026472	0.0533978	0.241	0.127	37.532
Tspan17	0.00206549	0.0533783	0.393	0.225	29.5199
Idh1	0.00576931	0.0533721	0.339	0.203	79.0742
Rnf6	0.00641878	0.053369	0.475	0.297	87.3596
Gstm1	0.000405654	0.0533416	0.304	0.152	6.06777
Sipa1l2	0.00573554	0.0533246	0.097	0.038	78.6401
Akap8	0.00122267	0.0533202	0.358	0.196	17.7776
Slc4a8	0.0027556	0.0533196	0.455	0.269	39
Tstd3	0.00381505	0.0532301	0.152	0.07	53.2086
Ctxn3	0.00804786	0.0532293	0.195	0.104	107.873
Xylt1	0.0015036	0.0531431	0.109	0.038	21.7136
Ndel1	0.00232669	0.053058	0.533	0.316	33.1298
Adamts10	0.00489264	0.0530502	0.113	0.047	67.5625
Thrb	0.0017977	0.0529919	0.148	0.063	25.7988
2810429I04Rik	0.000811695	0.0529715	0.035	0	11.9498
Tbc1d19	0.000956462	0.0529373	0.156	0.063	14.0083
Nsmaf	0.0281918	0.0529354	0.167	0.098	340.585
Cd83	0.0712928	0.0529286	0.261	0.184	751.498
Znrf2	8.3486e-05	0.0528611	0.304	0.139	1.277
Atg3	0.00117305	0.0528453	0.265	0.133	17.0773
Fads6	0.00330249	0.052814	0.132	0.057	46.3768
Erich3	0.00466598	0.0527447	0.35	0.209	64.5398
Mtmr1	0.00647196	0.0527207	0.202	0.108	88.0252
Dusp18	0.00120715	0.0526396	0.253	0.127	17.5567
G2e3	0.00367354	0.0526368	0.121	0.051	51.3597
Phka2	0.00560149	0.0525778	0.136	0.063	76.9308
Gm20300	0.00244965	0.0525605	0.296	0.165	34.8119
Fam45a	0.0054034	0.0525547	0.331	0.19	74.3237
Gabpa	0.00660401	0.0524397	0.117	0.051	89.6956
Hars2	0.00081446	0.0524347	0.191	0.085	11.9856
Rapgef3	0.000482218	0.0524295	0.125	0.041	7.1918
Cdh12	0.0112761	0.0523971	0.167	0.089	148.157
Zbtb34	0.000625864	0.0523784	0.093	0.025	9.2753
Zfp524	0.00112634	0.0523743	0.07	0.016	16.4187
Fam135a	0.0103751	0.0523682	0.21	0.117	137.149
Uqcc3	0.0148993	0.0522946	0.467	0.304	191.635
Zfp560	0.0016092	0.0522938	0.447	0.256	23.1854
Zfp141	0.000822272	0.0522672	0.136	0.051	12.0973
Armt1	0.00696101	0.0522395	0.167	0.085	94.2103
Clpb	0.0125185	0.0522051	0.218	0.127	163.43
Nampt	0.00279199	0.0521894	0.315	0.177	39.4954
Susd4	0.0389754	0.0521657	0.572	0.408	452.505
Tyw5	0.000776427	0.0521116	0.167	0.07	11.4453
Foxj3	0.00829474	0.052023	0.521	0.335	111.058
Sall2	0.0261447	0.0519829	0.459	0.304	319.933
Itga2b	0.00554816	0.0519778	0.113	0.047	76.2206
Sptb	0.00953666	0.0519706	0.218	0.123	126.723
Alkbh2	0.00152155	0.0519622	0.109	0.038	21.9636
Dck	0.00236912	0.0518085	0.253	0.133	33.7055
Nucb1	0.000558399	0.0517636	0.311	0.161	8.30339
Ttc26	0.0126655	0.0517228	0.089	0.038	165.208
Pcyt1b	0.000198861	0.0517197	0.101	0.025	3.00876
Coq7	0.00174716	0.051652	0.214	0.104	25.105
Sgce	0.0040716	0.0516138	0.268	0.146	56.6359
Ash2l	0.00951572	0.0516063	0.296	0.174	126.454
Hnrnpd	0.121112	0.0515707	0.708	0.522	1116.41
Asb3	0.0019457	0.0515514	0.183	0.085	27.8547
Tbl2	0.00282675	0.0514385	0.144	0.063	39.9759
Rc3h1	0.00182251	0.0514143	0.405	0.231	26.1439
Ube2j1	0.0172597	0.0513669	0.623	0.415	219.371
Fam185a	0.000572362	0.0513569	0.117	0.038	8.50473
Cabin1	0.00163848	0.0513395	0.49	0.278	23.5942
Mex3b	0.00165923	0.0513378	0.16	0.07	23.878
Ythdc1	0.0316191	0.0513173	0.817	0.63	377.152
Adk	0.0117439	0.0513055	0.183	0.101	153.951
Avl9	0.0110414	0.0512963	0.482	0.297	145.349
Armc6	0.00205668	0.0512841	0.202	0.098	29.3962
Lsm14a	0.00642959	0.0512785	0.393	0.241	87.4875
Cetn3	0.0502867	0.0512316	0.728	0.497	564.921
Utp18	0.00170575	0.0511475	0.179	0.082	24.5304
Akap6	0.00770352	0.0511373	0.704	0.487	103.589
Tspyl4	0.0780829	0.0510993	0.949	0.832	812.218
Cops7a	0.00322899	0.0510847	0.514	0.31	45.39
Rarb	0.00299063	0.0510845	0.082	0.025	42.1828
Plod3	0.00344838	0.0510782	0.183	0.089	48.3395
Gpbp1	0.0362239	0.0510679	0.661	0.478	424.87
Gm26760	0.00361511	0.0510462	0.062	0.016	50.5935
Iqcb1	0.0155336	0.0510173	0.366	0.231	198.892
Pex19	0.00538505	0.0510118	0.381	0.228	74.0876
Ppm1k	0.0164004	0.0510005	0.486	0.313	209.302
Cnbp	0.0595504	0.0509774	0.782	0.601	646.479
Ablim3	0.00481749	0.0509691	0.292	0.168	66.5633
Ippk	0.00235392	0.0509545	0.117	0.044	33.4963
Sec61a2	0.0388545	0.0509153	0.716	0.497	451.373
Taf12	0.000535995	0.0509083	0.167	0.066	7.97667
Plaa	0.00351872	0.0509039	0.233	0.123	49.2867
Kcnd3	0.00421419	0.0508771	0.331	0.19	58.5308
Tti2	0.00314848	0.0508705	0.113	0.044	44.3117
Fn3krp	0.00504179	0.0508133	0.109	0.044	69.5464
Hic2	0.00562444	0.0508013	0.128	0.057	77.2236
Sgsm1	0.0137735	0.050794	0.848	0.589	178.201
Plek	0.00497266	0.0507906	0.125	0.054	68.6178
Thoc5	0.00750779	0.0507863	0.105	0.044	101.152
Lrrc56	0.000272955	0.0507754	0.051	0.003	4.11233
Zfyve26	0.00516009	0.0507597	0.171	0.085	71.0957
Ccdc149	0.00680149	0.0507479	0.187	0.098	92.1805
Ccdc93	0.00226002	0.050737	0.167	0.076	32.2279
Tkt	0.00219316	0.0507125	0.428	0.25	31.292
Zfp426	0.00230295	0.0506857	0.21	0.104	32.817
Lims1	0.0229143	0.0506516	0.276	0.174	284.206
Gabarapl2	0.0544761	0.0506151	0.848	0.668	605.883
Gga3	0.0125485	0.0505575	0.261	0.155	163.77
Dcaf11	0.0080262	0.0505204	0.241	0.136	107.599
C130013H08Rik	0.00178157	0.0505114	0.054	0.009	25.5815
Moxd1	0.00609746	0.0505113	0.047	0.009	83.3157
Vps37d	0.00546275	0.0504717	0.272	0.152	75.1019
Zfp277	0.00790519	0.050468	0.125	0.057	106.119
Wdr3	0.0158005	0.0504607	0.144	0.076	202.072
Zcchc6	0.0032728	0.0504329	0.268	0.149	45.9763
Palm3	0.000689767	0.0504268	0.074	0.016	10.1982
Dnajc14	0.0145229	0.0504267	0.253	0.152	187.258
Rbmx2	0.00454714	0.0503969	0.14	0.063	62.9551
Nqo2	0.000208119	0.0503946	0.043	0	3.14759
Eif2b3	0.00101364	0.0503831	0.101	0.032	14.8265
Pdha1	0.0192492	0.0503308	0.545	0.361	242.541
Gm5431	0.000261136	0.0503148	0.051	0.003	3.93688
Fam214b	0.0121084	0.0502486	0.28	0.168	158.365
Gm26606	0.000762433	0.0502291	0.086	0.022	11.2467
Gas8	0.0087759	0.0502073	0.156	0.079	117.123
Hadha	0.000315564	0.0501938	0.37	0.187	4.74135
Slc25a20	0.00991057	0.0501879	0.14	0.07	131.404
Shisa2	0.000471942	0.0501834	0.179	0.073	7.04137
Fgd1	0.0017396	0.0501668	0.156	0.066	24.9997
Garem1	0.00209546	0.0501556	0.101	0.035	29.942
Cnot6l	0.01002	0.0501496	0.545	0.348	132.765
Map10	0.00644949	0.0500016	0.086	0.032	87.7453
Nfyc	0.00859663	0.0499627	0.152	0.076	114.894
Tor1aip1	0.0147292	0.0499102	0.187	0.104	189.668
Uros	0.0193251	0.0498676	0.187	0.108	243.439
Atp11c	0.00696696	0.0498629	0.105	0.044	94.27
Zfp704	0.0009447	0.049843	0.331	0.177	13.8399
Myo9b	0.00585349	0.0498404	0.132	0.06	80.1695
Psat1	0.0027516	0.0498329	0.109	0.041	38.9461
Rpl37	0.0098445	0.0498073	1	1	130.587
Kif1bp	0.00278215	0.0497118	0.432	0.247	39.3591
Nsun3	0.00274957	0.0496797	0.171	0.079	38.9202
Adpgk	0.000315085	0.0496613	0.23	0.101	4.73478
Fcho2	0.000901941	0.0496485	0.296	0.149	13.2306
Bid	0.00161044	0.0495646	0.21	0.101	23.2016
Hrasls	0.000819523	0.049553	0.249	0.12	12.0585
Thoc3	0.00829555	0.0495265	0.377	0.231	111.061
Adam11	0.00573272	0.0494947	0.257	0.146	78.6071
Nsdhl	0.00635073	0.0494686	0.117	0.051	86.5794
Mier1	0.0150077	0.0494483	0.405	0.259	192.848
Tjp1	0.00593419	0.0494158	0.156	0.076	81.2094
1700001L19Rik	0.0011189	0.0493973	0.261	0.13	16.3169
Sord	0.00198144	0.0493792	0.132	0.054	28.3563
Dlx2	0.00204796	0.049364	0.553	0.335	29.2755
Rnpc3	0.00112372	0.0493591	0.397	0.218	16.3838
Klf11	0.000646714	0.0492619	0.093	0.025	9.57525
Pex3	0.000484651	0.0492512	0.233	0.108	7.22663
Smchd1	0.00290111	0.0491867	0.319	0.184	40.9753
D2hgdh	0.00264621	0.0491847	0.082	0.025	37.5207
Nck1	0.00149719	0.0491548	0.265	0.133	21.6224
Anxa5	0.00154228	0.0491448	0.187	0.085	22.2535
Atxn1l	0.0063502	0.0491004	0.156	0.076	86.5786
Arpc2	0.078631	0.0490793	0.685	0.497	816.819
Crlf3	0.00280898	0.0490641	0.175	0.082	39.7274
4930518I15Rik	0.00457951	0.048926	0.078	0.025	63.3942
Rmnd5b	0.00210123	0.0489193	0.132	0.054	30.014
Abt1	0.000341205	0.0489079	0.16	0.06	5.12012
Wsb1	0.0306465	0.0488922	0.576	0.383	366.931
Efna3	0.0191955	0.0488891	0.218	0.13	241.96
Tfam	0.00407359	0.0488834	0.315	0.177	56.6555
Ddx21	0.00102213	0.0488783	0.16	0.066	14.9476
Clcn7	0.000513039	0.0488629	0.292	0.146	7.64275
Dhx57	0.00547855	0.048854	0.222	0.12	75.3082
3110035E14Rik	0.00204655	0.048847	0.249	0.13	29.2575
Lzts3	0.0016767	0.0488447	0.086	0.025	24.1177
Prpsap1	0.0175579	0.0488392	0.354	0.225	222.827
Med13l	0.02335	0.0488195	0.506	0.335	289.143
Atxn2	0.0130433	0.0488039	0.65	0.427	169.511
Fam90a1b	0.00359712	0.0488	0.062	0.016	50.3489
Cpsf6	0.0290161	0.0487999	0.584	0.396	349.499
Phip	0.0126618	0.0487083	0.646	0.449	165.173
Psd2	0.017593	0.0486993	0.424	0.269	223.237
Ranbp1	0.0219032	0.0486951	0.63	0.43	272.805
4930503L19Rik	0.00177284	0.0486832	0.074	0.019	25.4598
Ctsa	0.0241962	0.0486828	0.167	0.095	298.581
Myl6b	0.00448309	0.0486712	0.078	0.025	62.1043
Slc2a12	0.000758749	0.04867	0.086	0.022	11.1946
4732496C06Rik	0.00102674	0.0486595	0.101	0.032	15.014
Mtx2	0.0147002	0.0486472	0.253	0.152	189.354
Ccnl1	0.0176355	0.0486272	0.518	0.354	223.689
Uimc1	0.00156471	0.0486161	0.206	0.098	22.5678
Grid1	0.00382807	0.0486084	0.335	0.196	53.3824
Cux1	0.00514965	0.0486061	0.412	0.247	70.957
Edem1	0.00165558	0.0485946	0.074	0.019	23.8288
Tbk1	0.00678674	0.0485836	0.307	0.18	92.0079
Xpo6	0.00450486	0.048575	0.436	0.266	62.3833
Ovgp1	0.00218217	0.0485314	0.066	0.016	31.1395
Sec16a	0.0127664	0.0484949	0.233	0.139	166.448
Cct4	0.0252165	0.04844	0.564	0.377	309.81
Ddit4	0.0153141	0.0483334	0.144	0.076	196.372
Gm10600	0.0272944	0.0483169	0.082	0.038	330.944
Mia3	0.0197549	0.0483138	0.545	0.358	248.398
Sbds	0.00687194	0.0482593	0.377	0.228	93.0529
Afg3l1	0.00319042	0.0482549	0.447	0.263	44.8892
Lin54	0.0206646	0.0481891	0.086	0.038	258.596
Zfp758	0.0035612	0.0481885	0.086	0.028	49.8675
Tmem50b	0.0455375	0.0481763	0.556	0.389	519.309
Rab39b	0.0229369	0.0481746	0.354	0.228	284.441
Plekhm3	0.000786364	0.0481624	0.233	0.111	11.5871
Bloc1s2	0.000470885	0.0481558	0.424	0.218	7.02654
Elac1	0.0136784	0.0481431	0.362	0.225	177.067
Hif1an	0.000955409	0.0481063	0.171	0.073	13.9939
Ube4b	0.00752265	0.0480611	0.545	0.345	101.345
Smim4	0.00776201	0.0479903	0.089	0.035	104.329
Zfp933	0.0016426	0.0479721	0.097	0.032	23.6518
Taz	0.025554	0.0479489	0.525	0.351	313.317
Pde3b	0.00295918	0.0479165	0.175	0.082	41.7569
Dtnbp1	0.00280417	0.0478669	0.331	0.187	39.6621
Ercc6l2	0.00584923	0.0478435	0.167	0.082	80.1169
Pex12	0.0105512	0.047762	0.101	0.044	139.297
Dcun1d3	0.00889521	0.0477526	0.156	0.079	118.609
Brd4	0.0105162	0.0477267	0.634	0.399	138.866
Prkd2	0.000966305	0.0477127	0.058	0.009	14.1506
Dhodh	0.00490438	0.0477043	0.163	0.079	67.7197
Cops4	0.0216992	0.0476966	0.44	0.288	270.546
Dnttip1	0.000865946	0.0476611	0.304	0.158	12.7208
Abat	0.125097	0.0476402	0.872	0.699	1144.39
Aldh3a2	0.00324	0.0476183	0.171	0.082	45.535
Dgcr8	0.00166727	0.0476144	0.28	0.146	23.9887
Ltn1	0.00115442	0.0475837	0.23	0.111	16.8175
Rbbp8	0.0196668	0.0475694	0.086	0.038	247.369
Mphosph10	0.00271155	0.0475622	0.144	0.063	38.3929
Srgap2	0.000549777	0.0475541	0.245	0.117	8.17793
Nol9	0.00934778	0.0475172	0.132	0.063	124.344
Zfp213	0.00167029	0.0474764	0.097	0.032	24.0304
Fcho1	0.00169818	0.0474365	0.21	0.101	24.4233
Hk1	0.0327652	0.0474247	0.603	0.421	389.644
Washc2	0.0196281	0.0473912	0.222	0.133	246.96
Rnf219	0.00088176	0.0473419	0.16	0.066	12.9442
Ino80	0.00760406	0.0473352	0.187	0.098	102.366
Cog3	0.00309565	0.0472835	0.167	0.079	43.5961
Ccnk	0.00599748	0.0472722	0.226	0.123	82.0336
Zfp14	0.00475781	0.0472571	0.078	0.025	65.7577
Zswim9	0.00192826	0.0472462	0.179	0.082	27.6204
Wwc1	0.00445627	0.0472188	0.222	0.117	61.7505
Arnt	0.00267608	0.0471955	0.214	0.108	37.9147
Kcnj6	0.0121332	0.0471671	0.086	0.035	158.654
Dcaf1	0.00231996	0.0471604	0.28	0.149	33.0479
Dido1	0.00348086	0.0471557	0.401	0.231	48.7739
Mef2c	0.0477406	0.0471528	0.284	0.196	539.564
Ipo8	0.00364375	0.0471391	0.362	0.206	50.9797
Mib2	0.0121136	0.0471227	0.307	0.184	158.409
Mapk8ip1	0.0221469	0.0470706	0.712	0.5	275.662
Opn3	0.0015497	0.0470555	0.175	0.079	22.3559
Jtb	0.0336618	0.0470286	0.521	0.351	398.791
Fstl4	0.00104194	0.047008	0.089	0.025	15.228
Gm32014	0.00380097	0.0469951	0.101	0.038	53.0235
Insm2	0.00563395	0.0469552	0.148	0.07	77.3428
Gtf3a	0.00419805	0.046947	0.331	0.187	58.3151
Sgk1	0.0104567	0.0469278	0.121	0.057	138.123
Cep57l1	0.0145395	0.0469243	0.109	0.051	187.443
Vars	0.0122444	0.046913	0.128	0.063	159.997
Rnf8	0.00144111	0.0468854	0.249	0.127	20.847
Brd1	0.00801343	0.0468775	0.272	0.158	107.444
B230217O12Rik	0.00310401	0.0468521	0.226	0.117	43.7045
Dusp16	0.000835118	0.0466916	0.066	0.013	12.2787
Pwp1	0.000335052	0.0466885	0.175	0.07	5.03081
St3gal5	0.00143125	0.0466839	0.268	0.139	20.7117
Rnf13	0.00392206	0.0466795	0.319	0.18	54.6303
[truncated: 13,919 more rows]

## Sheet: VgatEsr1P50MvsCast
	p_val	avg_logFC	pct.1	pct.2	p_val_adjust
Eef1a2	5.95623e-41	0.776003	0.902	0.409	9.53354e-37
Pgr	8.27261e-30	0.606532	0.817	0.356	1.32378e-25
Ptp4a1	1.11897e-27	0.584657	0.928	0.584	1.79047e-23
1500009L16Rik	2.22439e-18	0.558937	0.817	0.488	3.55725e-14
Nts	9.31493e-08	0.548375	0.553	0.352	0.00147986
Parm1	4.22867e-17	0.534407	0.609	0.242	6.76123e-13
Napb	8.10865e-12	0.530904	0.983	0.915	1.29414e-07
Prkce	9.77333e-22	0.528819	0.906	0.637	1.56344e-17
Cntnap2	8.08614e-21	0.507048	0.932	0.708	1.29346e-16
Ogfrl1	1.15572e-15	0.487208	0.877	0.594	1.84707e-11
Irs4	7.56526e-19	0.471967	0.983	0.89	1.20999e-14
Lamp5	1.07908e-18	0.468829	0.43	0.1	1.72577e-14
Nos1	2.76897e-09	0.453708	0.6	0.359	4.40848e-05
Maged1	5.2598e-19	0.429164	0.966	0.868	8.41305e-15
Gm10076	6.25929e-18	0.428128	0.898	0.609	1.00092e-13
Grik1	9.83704e-12	0.420553	0.643	0.342	1.5697e-07
Gal	1.09318e-09	0.418304	0.494	0.231	1.74143e-05
Tmem35a	7.33479e-12	0.415168	0.702	0.423	1.17078e-07
Thy1	1.94297e-09	0.40052	0.877	0.708	3.09379e-05
Ube2m	9.95106e-17	0.399506	0.732	0.356	1.59078e-12
Id4	6.75355e-10	0.392717	0.787	0.577	1.07631e-05
Hpcal1	1.74523e-12	0.391786	0.902	0.705	2.78678e-08
Gfra1	6.08307e-12	0.39104	0.566	0.27	9.7104e-08
Sez6l	1.20344e-12	0.390948	0.911	0.783	1.92202e-08
Itm2c	9.7088e-23	0.38681	1	0.975	1.55321e-18
Mt3	2.87704e-14	0.385723	0.979	0.84	4.59694e-10
Irs2	3.47762e-12	0.384028	0.566	0.26	5.55202e-08
Pcsk1n	7.72383e-08	0.383139	0.996	0.989	0.00122732
Ctnna2	3.20886e-12	0.383117	0.757	0.473	5.12359e-08
Pdzrn4	9.73261e-12	0.375611	0.847	0.58	1.55313e-07
Actg1	2.86339e-17	0.375427	0.996	0.872	4.57855e-13
Ankrd46	1.6337e-11	0.372956	0.813	0.544	2.6064e-07
Hras	4.20011e-12	0.369567	0.872	0.683	6.70506e-08
Calm3	3.43698e-15	0.365544	0.983	0.915	5.49195e-11
Dlk1	0.11704	0.34183	0.26	0.21	1392.89
Apoc3	1.19919e-12	0.340001	0.485	0.178	1.91535e-08
Pak3	2.17444e-15	0.335582	0.996	0.94	3.47497e-11
Sv2c	2.54287e-08	0.335456	0.604	0.37	0.000404393
Nexmif	4.86492e-11	0.32965	0.736	0.42	7.76003e-07
Nell2	1.80528e-09	0.329386	0.651	0.391	2.87491e-05
Pgam1	1.56697e-10	0.328258	0.906	0.765	2.49854e-06
Greb1	4.96941e-16	0.324849	0.298	0.036	7.9431e-12
Nrip1	7.534e-09	0.323052	0.545	0.31	0.000119881
Chst2	7.39024e-11	0.320721	0.387	0.132	1.17867e-06
Syt6	2.17437e-08	0.320213	0.421	0.206	0.000345877
Aes	8.49681e-12	0.319871	0.953	0.829	1.35601e-07
mt-Co2	1.03535e-33	0.315997	1	0.996	1.65709e-29
Zbtb20	9.91904e-05	0.312729	0.936	0.907	1.55302
Pdcd7	1.50161e-08	0.303167	0.6	0.349	0.000238876
Ets2	8.84118e-08	0.298041	0.689	0.484	0.00140469
Aatk	2.72811e-10	0.296883	0.8	0.555	4.34888e-06
Gpr83	8.26806e-07	0.296067	0.238	0.082	0.0131024
Syndig1l	7.25974e-11	0.293356	0.272	0.064	1.15793e-06
Ubl3	1.24996e-07	0.292644	0.787	0.601	0.00198519
Tiparp	1.20301e-11	0.29042	0.289	0.068	1.91941e-07
Spock1	0.000207282	0.289796	0.766	0.694	3.23111
mt-Nd4l	3.70731e-11	0.288299	0.915	0.676	5.9139e-07
Kif5a	4.89351e-09	0.2877	0.928	0.765	7.78851e-05
Camk2n2	1.09964e-07	0.285467	0.851	0.673	0.00174678
Map1a	2.70842e-09	0.285354	0.855	0.662	4.31234e-05
Fstl5	1.06078e-07	0.284902	0.889	0.712	0.00168516
Drp2	4.87618e-08	0.283526	0.489	0.26	0.000775167
Crim1	0.000158056	0.27961	0.723	0.562	2.46805
Ctnnb1	6.91614e-08	0.277806	0.817	0.573	0.00109911
Abat	6.53087e-10	0.277707	0.928	0.776	1.04089e-05
Hs2st1	1.24762e-07	0.275374	0.711	0.463	0.0019816
Dynll2	7.82538e-12	0.272652	0.996	0.979	1.24901e-07
mt-Atp6	2.30981e-30	0.272573	1	1	3.6964e-26
Tubb3	1.28765e-07	0.272482	0.817	0.609	0.00204492
Sytl4	1.86563e-09	0.272031	0.14	0.007	2.97083e-05
Sult4a1	1.85573e-07	0.271144	0.86	0.669	0.00294578
Rnd2	9.4606e-10	0.269768	0.698	0.391	1.50717e-05
Mblac2	7.68759e-10	0.269524	0.723	0.431	1.22509e-05
mt-Nd1	4.63142e-27	0.267619	1	1	7.41027e-23
Socs2	1.39032e-13	0.266889	0.2	0.007	2.22103e-09
Cartpt	3.75893e-05	0.266786	0.183	0.068	0.590904
Arf3	1.69163e-09	0.266395	0.987	0.879	2.69409e-05
Kcnk2	2.01024e-06	0.265825	0.813	0.641	0.0318201
Brinp2	3.09629e-07	0.264315	0.609	0.356	0.00491226
Scn1b	8.21656e-07	0.263981	0.63	0.399	0.0130216
Adgrl1	9.03039e-10	0.262541	0.953	0.843	1.43872e-05
Atp5k	2.92949e-08	0.260112	0.911	0.754	0.000465788
Hs3st5	1.01237e-08	0.26	0.519	0.26	0.000161069
Scd2	8.52766e-07	0.257504	0.953	0.858	0.0135129
Sipa1l1	5.8385e-07	0.255152	0.528	0.299	0.00925635
Ipo5	2.23324e-07	0.252992	0.583	0.345	0.00354394
Camk2b	4.73789e-08	0.25258	0.962	0.858	0.000753229
Syp	1.44165e-09	0.250372	0.974	0.918	2.29612e-05
Insig1	7.68987e-06	0.248353	0.498	0.278	0.121385
Lynx1	8.914e-06	0.247599	0.638	0.431	0.140663
Hspa8	8.40137e-10	0.247316	0.979	0.964	1.33859e-05
Psd3	5.38606e-06	0.246821	0.766	0.562	0.0850943
Fam171b	7.86616e-06	0.246668	0.885	0.786	0.12416
Lrrc4b	2.13052e-07	0.246126	0.809	0.544	0.00338114
Vip	0.261026	0.24482	0.051	0.032	2474.79
Stk19	1.40569e-06	0.24441	0.515	0.302	0.0222591
Map1lc3a	2.26714e-08	0.243554	0.945	0.84	0.000360611
Eif1b	1.07865e-08	0.243508	0.962	0.897	0.000171602
Trp53i11	1.87059e-05	0.243103	0.383	0.21	0.29473
Myh10	2.3336e-05	0.241643	0.728	0.509	0.367449
Cdh4	2.80246e-09	0.239886	0.443	0.192	4.46151e-05
Magi1	1.5839e-05	0.239241	0.774	0.601	0.24967
Scrn1	2.92035e-06	0.238339	0.894	0.765	0.0461912
Pnma3	2.58882e-07	0.23741	0.672	0.438	0.00410742
Col25a1	2.25828e-06	0.237084	0.421	0.221	0.0357373
Scn2b	5.27328e-05	0.236141	0.8	0.648	0.828063
Tnrc6c	4.04158e-07	0.235252	0.766	0.52	0.00640994
Rnf112	2.85909e-05	0.234946	0.719	0.527	0.449935
Gnai1	4.88505e-05	0.233312	0.711	0.534	0.76749
Camk4	5.07775e-06	0.231653	0.515	0.313	0.0802386
Tmsb10	5.65673e-14	0.230963	1	0.996	9.03776e-10
Csnk1g2	3.97844e-07	0.230425	0.562	0.295	0.0063102
Tmem215	2.52694e-08	0.229983	0.272	0.085	0.000401885
Iqsec3	4.64412e-06	0.229638	0.74	0.527	0.073405
Chst11	1.30969e-07	0.229442	0.4	0.181	0.00207966
Nudt4	5.90968e-07	0.228944	0.536	0.292	0.00936802
Cltc	3.45442e-07	0.227012	0.962	0.872	0.00547974
mt-Nd3	4.95979e-08	0.226608	0.987	0.943	0.000788408
Hapln4	1.30361e-06	0.225773	0.472	0.249	0.0206479
Sccpdh	3.98073e-06	0.225112	0.672	0.459	0.0629354
Pcp4	0.000471497	0.224351	0.991	0.979	7.29925
Tspyl4	5.88927e-07	0.222905	0.97	0.918	0.00933626
Gm16485	1.30963e-07	0.221907	0.26	0.085	0.00207969
Vgf	0.4349	0.221581	0.255	0.224	2639.41
Pdcd4	2.12967e-06	0.220811	0.902	0.705	0.0337085
Nat8l	4.72114e-06	0.219921	0.668	0.445	0.0746128
Vsnl1	0.000570788	0.219444	0.821	0.705	8.82153
Ywhah	1.13152e-09	0.219177	0.987	0.982	1.8024e-05
Galnt16	7.15728e-06	0.219035	0.851	0.648	0.113006
Tubb4a	1.78739e-06	0.218073	0.919	0.747	0.0282961
Cdk8	7.86282e-08	0.218056	0.477	0.231	0.00124932
Prpf19	7.12167e-06	0.216722	0.66	0.445	0.112451
Prkacb	1.91748e-07	0.216	1	0.982	0.00304361
Ret	5.54447e-08	0.215135	0.255	0.075	0.000881238
Minos1	4.10368e-07	0.214821	0.919	0.819	0.00650803
Wnt4	0.000139377	0.214793	0.268	0.142	2.17804
Nrp1	1.03816e-06	0.213741	0.489	0.26	0.0164476
Pdha1	6.08317e-05	0.213683	0.655	0.445	0.954693
Cadm4	2.19313e-05	0.21311	0.634	0.416	0.345417
Eef2	1.18664e-07	0.210804	0.979	0.925	0.00188485
Ecel1	0.000887137	0.210618	0.715	0.569	13.6451
Ube2n	3.43875e-05	0.210403	0.834	0.658	0.540674
Tuba4a	7.16157e-05	0.209718	0.77	0.58	1.12279
Fgfr1	0.000834881	0.209323	0.638	0.466	12.8488
Tsr2	3.28904e-06	0.209272	0.745	0.498	0.0520129
Atp5e	0.000103999	0.20852	0.911	0.794	1.62789
Hk1	2.54211e-06	0.207455	0.681	0.477	0.0402188
Rock2	6.11356e-05	0.207296	0.774	0.598	0.959339
Fam168b	6.62863e-05	0.206383	0.728	0.502	1.0397
Ube2j1	0.000203938	0.205287	0.66	0.477	3.17939
Jph3	8.12554e-05	0.204418	0.604	0.413	1.27319
Ndufab1	2.35141e-05	0.203829	0.762	0.562	0.37023
Arf1	7.10465e-06	0.203769	0.949	0.868	0.112189
Snn	0.000229267	0.203282	0.638	0.473	3.56945
Dhcr24	1.35765e-06	0.202957	0.523	0.274	0.0215011
Aplp1	1.27547e-05	0.202364	0.974	0.865	0.201155
mt-Nd2	1.39338e-10	0.201621	1	0.993	2.22189e-06
Pcp4l1	5.42921e-08	0.20159	0.255	0.075	0.000862973
Hcrtr1	2.1615e-10	0.200483	0.17	0.014	3.44607e-06
Ccdc85b	9.68188e-06	0.200143	0.353	0.174	0.152751
Cd83	4.0867e-05	0.199903	0.515	0.32	0.642347
Cdkl5	4.27375e-05	0.199852	0.574	0.37	0.67162
Adra2a	2.96407e-05	0.199479	0.294	0.139	0.466367
Acvr1c	2.38488e-11	0.198771	0.179	0.011	3.80459e-07
mt-Cytb	3.57001e-13	0.198762	1	1	5.70238e-09
Pkm	1.82503e-05	0.196704	0.962	0.868	0.287569
Scml4	1.20113e-06	0.196687	0.362	0.164	0.0190283
Pdxp	9.7713e-07	0.195803	0.932	0.754	0.0154816
Slc25a12	1.63016e-05	0.195293	0.643	0.42	0.256929
Wsb2	3.42719e-05	0.193867	0.74	0.488	0.538891
Mast4	5.47867e-05	0.193773	0.626	0.416	0.860207
Dlgap1	0.000594421	0.193493	0.647	0.477	9.18321
Hmgcs1	0.000680898	0.192986	0.809	0.68	10.5008
Sar1a	3.25218e-05	0.192534	0.711	0.488	0.511502
Atp1a1	9.87289e-05	0.192423	0.617	0.413	1.5459
Cfl1	4.15391e-06	0.192078	0.979	0.907	0.0656692
Enah	0.000614371	0.19192	0.957	0.826	9.48835
Rab6b	4.56961e-05	0.191599	0.936	0.804	0.718023
Maea	0.000144487	0.191339	0.609	0.416	2.25703
Epm2a	7.8767e-06	0.190954	0.426	0.224	0.124318
Clstn3	1.20324e-05	0.190831	0.855	0.69	0.189776
Phf6	3.14513e-05	0.189919	0.443	0.26	0.494728
Idnk	0.000198832	0.189752	0.481	0.306	3.10019
Rab3a	1.5265e-05	0.18943	0.953	0.872	0.240652
Pafah1b2	0.000159488	0.188747	0.881	0.744	2.48976
Slc6a17	0.000116361	0.188386	0.86	0.687	1.82
Got1	6.25454e-05	0.18826	0.698	0.502	0.981337
Ppia	7.55813e-07	0.18814	0.983	0.943	0.0119789
Trp53inp2	1.24918e-06	0.187911	0.417	0.203	0.0197883
Tnfrsf21	3.06079e-05	0.187771	0.587	0.359	0.481524
Nyap1	2.19553e-05	0.187733	0.681	0.48	0.345775
mt-Nd4	1.65588e-12	0.187498	1	0.996	2.64427e-08
Fkbp5	8.18289e-10	0.187249	0.319	0.093	1.30386e-05
Rpl35	5.24644e-09	0.18663	1	0.989	8.34918e-05
Syndig1	1.57109e-07	0.185911	0.247	0.075	0.00249426
Dgkb	0.000110186	0.185902	0.685	0.459	1.72386
Mapk3	0.000352409	0.185829	0.566	0.406	5.47115
Kcnab2	1.29774e-06	0.18551	0.349	0.153	0.0205562
Sgsm1	0.00017226	0.185184	0.817	0.683	2.68795
Camkv	0.000220438	0.184983	0.672	0.491	3.43332
Cplx1	0.0165446	0.184908	0.391	0.292	236.34
Eif5a	5.77783e-05	0.184895	0.928	0.811	0.906945
Tmem50b	0.000361303	0.184235	0.596	0.416	5.60743
Rbms3	0.00900874	0.18359	0.451	0.317	132.113
Glrx5	2.18669e-05	0.18307	0.711	0.505	0.344426
Cyfip2	6.92228e-06	0.183	0.932	0.836	0.109324
Prkar1b	1.11525e-05	0.18286	0.991	0.947	0.17592
Tpi1	0.000213516	0.181823	0.864	0.726	3.32701
Uqcr11	7.52133e-06	0.181773	0.86	0.658	0.118732
Nxn	2.49717e-08	0.181741	0.157	0.021	0.000397175
Phyhipl	0.000409235	0.181713	0.681	0.48	6.34314
Unc5b	6.59109e-07	0.181618	0.183	0.046	0.0104475
Prkag2	2.43238e-06	0.181569	0.379	0.185	0.0384876
Faim2	2.54923e-05	0.181489	0.979	0.943	0.4013
Tmcc3	0.000176319	0.179535	0.838	0.712	2.75075
Smap1	0.000658658	0.179326	0.553	0.391	10.1624
Dld	0.000119399	0.178858	0.468	0.288	1.86717
Chchd4	8.81405e-05	0.178846	0.928	0.772	1.38081
Stx1a	0.00023164	0.178788	0.366	0.21	3.60617
Polr2l	7.8835e-05	0.178337	0.477	0.288	1.23558
Slitrk6	1.49343e-06	0.178139	0.196	0.057	0.0236455
Camk2d	0.00148575	0.177526	0.757	0.587	22.7141
Slc35e3	2.86197e-06	0.1775	0.481	0.253	0.0452707
Nudt10	0.000679334	0.177187	0.485	0.324	10.4774
Ptpn5	0.000462462	0.176262	0.74	0.577	7.16123
Ldlr	3.50247e-06	0.176123	0.34	0.157	0.0553845
Ablim2	2.40851e-05	0.175681	0.443	0.246	0.379195
Mrpl52	3.63372e-05	0.175637	0.906	0.79	0.571293
Oxct1	0.00244964	0.175465	0.677	0.544	37.1512
Lonrf2	0.000107828	0.175283	0.957	0.897	1.68751
Atp1a3	0.000443771	0.175258	0.906	0.772	6.87401
Rasgrf2	0.116018	0.175223	0.638	0.609	1382.35
Dcun1d4	0.000799807	0.174365	0.711	0.552	12.3154
Gdi2	0.000220258	0.174347	0.864	0.708	3.43074
Mrpl20	5.12678e-05	0.174268	0.562	0.363	0.805212
Sncb	0.00552131	0.173659	0.8	0.715	82.1736
Gpx3	0.00221968	0.173199	0.791	0.673	33.7347
Elmo1	0.00686905	0.172752	0.626	0.505	101.6
March6	0.000165085	0.172376	0.86	0.722	2.57681
Ndufv3	4.72637e-05	0.172245	0.8	0.609	0.742607
Phlda1	0.000204489	0.171949	0.255	0.128	3.18778
Ssx2ip	0.000128575	0.17181	0.66	0.445	2.00976
Ppp2r2d	0.000616912	0.171394	0.591	0.406	9.52697
H2-Q2	1.61748e-05	0.170761	0.234	0.093	0.254947
Rell2	0.0003613	0.170482	0.583	0.402	5.60774
Bsg	0.00138294	0.170407	0.868	0.733	21.1646
Rbbp7	0.00272719	0.170213	0.574	0.423	41.2788
Mfn2	5.65395e-05	0.169846	0.664	0.47	0.887557
Asic2	4.22093e-06	0.168955	0.502	0.274	0.0667245
Sephs2	0.000311859	0.168866	0.443	0.281	4.84661
Impact	2.4267e-06	0.167883	1	0.989	0.0384001
Rnf157	0.00144833	0.167483	0.63	0.456	22.1507
Bend6	0.00271769	0.167282	0.774	0.676	41.1403
AF529169	2.72477e-06	0.167251	0.217	0.068	0.0431032
Kcnc1	0.000724899	0.167095	0.757	0.623	11.175
Arhgdia	0.00053702	0.167027	0.83	0.658	8.30393
Nefh	9.00401e-06	0.166876	0.294	0.128	0.142074
Ube2s	0.000185942	0.16677	0.834	0.605	2.89977
Tmem179	0.000440206	0.166728	0.83	0.712	6.81966
Arhgdig	0.00022835	0.166482	0.77	0.594	3.55541
Tubb5	2.11653e-05	0.166015	0.97	0.879	0.333439
Cox5a	0.000139644	0.165383	0.774	0.587	2.18207
Caln1	0.000122106	0.165187	0.409	0.238	1.90912
Pappa	7.19846e-06	0.164899	0.187	0.057	0.113649
Tmem250-ps	0.000455385	0.164686	0.455	0.295	7.0521
Hnrnpd	0.000127439	0.163877	0.787	0.605	1.99213
Mrps21	0.00021868	0.163821	0.647	0.413	3.40703
Elob	0.000520474	0.163662	0.809	0.63	8.05017
Slc12a5	0.000510104	0.163499	0.936	0.868	7.89079
Smim19	0.000880863	0.163293	0.579	0.402	13.5512
Map2k4	0.000129945	0.162989	0.872	0.698	2.03091
Bola2	0.00062273	0.162955	0.834	0.665	9.61432
Odc1	0.00656565	0.162625	0.557	0.413	97.2636
Reln	0.025071	0.162383	0.128	0.071	350.719
Saraf	0.000904975	0.162108	0.919	0.872	13.9176
Gria1	0.000329535	0.161974	0.877	0.719	5.11867
Kdm7a	0.000317379	0.161311	0.323	0.181	4.93081
Cbln2	0.000285136	0.160847	0.183	0.078	4.43443
Kcnk9	0.0495737	0.16071	0.383	0.306	660.768
Prkcb	0.00397114	0.160623	0.698	0.534	59.6425
Reep5	0.000188239	0.160566	0.974	0.872	2.93521
Ncdn	0.0206749	0.160513	0.804	0.719	291.991
Stx7	0.000312064	0.16046	0.766	0.609	4.84947
Cnih2	0.000158299	0.160346	0.906	0.73	2.47169
Scn8a	0.000152828	0.160012	0.63	0.42	2.38657
Uqcrq	0.0021169	0.159962	0.872	0.722	32.1875
Tmem151a	0.00088437	0.159903	0.536	0.37	13.6034
Fxyd2	0.000952852	0.15945	0.353	0.21	14.6472
mt-Co1	1.41674e-12	0.159375	1	1	2.26253e-08
Tspan17	0.000264492	0.159041	0.443	0.267	4.11471
Olfm3	0.00523802	0.158926	0.609	0.47	78.0989
Syt13	0.000936496	0.158336	0.753	0.566	14.3986
BC005537	0.000435605	0.158115	0.745	0.58	6.74927
Gm1673	0.0028071	0.158066	0.945	0.822	42.4686
Dock10	2.24245e-05	0.157417	0.213	0.082	0.353142
Pigt	4.87963e-06	0.157259	0.387	0.185	0.0771128
Ndrg4	0.00096905	0.157123	0.979	0.961	14.8943
Vps4a	0.00178448	0.155798	0.502	0.342	27.2186
Sv2a	3.39646e-05	0.155614	0.996	0.943	0.534093
Hs3st2	3.14068e-09	0.155609	0.166	0.018	4.99934e-05
Vamp2	1.1653e-05	0.155204	0.996	0.968	0.183803
Hars	0.000117793	0.155193	0.417	0.228	1.84217
Maf	1.37275e-05	0.154917	0.162	0.046	0.216456
Phactr1	0.00330138	0.154851	0.638	0.502	49.8311
Pim3	2.60408e-05	0.15462	0.315	0.149	0.409908
Eif2s3x	3.19769e-05	0.154378	0.609	0.391	0.502964
Trnp1	0.000182962	0.153688	0.328	0.178	2.85365
Spock3	0.0104239	0.153533	0.74	0.633	152.127
Disp3	1.66408e-05	0.153382	0.268	0.114	0.262259
Adam11	0.000632438	0.153147	0.328	0.189	9.76295
Rhou	4.12655e-05	0.152986	0.285	0.132	0.648528
Mrap2	0.0807435	0.152296	0.421	0.363	1014.3
Krt222	5.82171e-05	0.152258	0.34	0.174	0.913776
Agpat4	0.00717752	0.152024	0.596	0.463	106.048
Fam124a	0.000409276	0.152019	0.251	0.125	6.34336
Ddx3x	0.00252244	0.151678	0.817	0.722	38.2351
Klc2	0.000982649	0.151637	0.664	0.466	15.0994
Adcy3	6.62642e-05	0.151567	0.421	0.238	1.03942
Srxn1	0.000398207	0.15152	0.498	0.306	6.17421
Alg2	0.00103668	0.150967	0.923	0.786	15.9193
Rwdd2a	3.94897e-05	0.150448	0.434	0.242	0.620739
Cdr2	3.70482e-06	0.150326	0.243	0.089	0.0585806
Ndufa3	0.0017794	0.150282	0.851	0.705	27.1429
Pin1	0.000758478	0.150033	0.621	0.438	11.6843
Ywhag	5.90366e-06	0.149878	1	1	0.0932601
Flywch2	0.00152383	0.14945	0.34	0.206	23.2948
Ngb	0.0134262	0.14939	0.787	0.658	193.901
Eif4g2	0.000699377	0.148578	0.974	0.95	10.7851
Osbpl2	0.00014374	0.148547	0.443	0.263	2.24565
Spock2	0.000148641	0.148474	0.94	0.886	2.32177
Mapre1	0.00459143	0.148357	0.711	0.548	68.6969
Tsnax	0.00317081	0.148043	0.706	0.584	47.8919
Fkbp8	0.000802686	0.147787	0.804	0.612	12.359
Dcp2	0.00161179	0.147702	0.545	0.363	24.6185
Stmn3	0.000215787	0.147697	0.966	0.904	3.36218
Ap1s2	0.169481	0.147641	0.532	0.484	1842.6
Cspg5	0.00016688	0.14726	0.838	0.68	2.60466
2310061I04Rik	0.0016692	0.14718	0.54	0.356	25.482
Fxyd7	0.0015394	0.14689	0.494	0.335	23.5281
Nlgn3	0.00205145	0.14676	0.774	0.609	31.2149
Syn2	0.00148073	0.146687	0.928	0.826	22.6404
Sdc3	0.00119272	0.146652	0.706	0.527	18.2891
Hsdl1	2.67032e-05	0.14644	0.515	0.288	0.420282
Gas6	8.1912e-05	0.146376	0.323	0.164	1.28331
Cep170b	0.00310626	0.146368	0.74	0.569	46.9418
Kcnb1	0.00188858	0.146183	0.57	0.406	28.7706
Rcn1	0.00262911	0.146072	0.494	0.363	39.8231
Atp1b3	0.00198328	0.145965	0.74	0.591	30.1935
Pcyox1	0.00388085	0.145914	0.643	0.505	58.333
Htr1b	0.00503876	0.145847	0.357	0.231	75.1884
Nrsn1	0.000152509	0.145823	0.996	0.986	2.38173
Smoc1	5.57952e-05	0.145681	0.17	0.06	0.875985
Cckar	0.000292222	0.1456	0.209	0.096	4.54347
Prkaca	0.00459439	0.145566	0.915	0.797	68.7367
mt-Nd5	0.000161588	0.145552	0.957	0.886	2.52239
Ube2z	0.000352604	0.145454	0.591	0.395	5.47383
Ddhd1	0.00636386	0.145198	0.46	0.335	94.3633
Htr7	5.50345e-06	0.145107	0.213	0.071	0.0869435
Idi1	0.00265272	0.14496	0.362	0.235	40.1727
Pts	0.000437148	0.144878	0.362	0.206	6.77273
Ptcd3	0.000555224	0.144299	0.319	0.178	8.5821
Cuedc1	0.000387783	0.144181	0.464	0.285	6.01413
Bcl2l2	0.000377635	0.144181	0.545	0.338	5.85788
Stt3b	0.000773047	0.143962	0.345	0.203	11.908
Atp2a2	0.00158439	0.143868	0.885	0.811	24.208
Ccnb1ip1	0.00722069	0.143676	0.374	0.256	106.664
Man2a2	0.00193178	0.143667	0.604	0.42	29.4209
Hspa4	0.000721845	0.143609	0.702	0.537	11.1294
Olfm2	0.000465995	0.143576	0.477	0.306	7.21501
Galnt17	0.000443016	0.143464	0.468	0.299	6.86276
Abca3	0.000212561	0.143186	0.477	0.288	3.31234
Tango2	0.00166837	0.143002	0.681	0.495	25.471
Pik3r3	0.000170083	0.142985	0.319	0.171	2.65414
Tollip	0.000263858	0.142759	0.583	0.388	4.1051
Atp5d	0.00375675	0.142704	0.689	0.534	56.5052
Fam8a1	0.004868	0.142681	0.774	0.616	72.6988
Sept8	0.000553363	0.142594	0.634	0.441	8.55389
Fam84a	0.00223549	0.142478	0.489	0.345	33.9682
Rps6ka2	0.000365423	0.142425	0.443	0.27	5.67063
Cntnap1	0.000170052	0.142125	0.379	0.21	2.65384
Lyrm9	0.00118346	0.142048	0.638	0.466	18.1518
Rpn2	0.000210311	0.141995	0.374	0.217	3.27791
Marcksl1	0.000632915	0.141987	0.962	0.865	9.76968
Fbxo2	6.35539e-05	0.141876	0.4	0.217	0.997098
Ssbp3	0.0136446	0.141703	0.809	0.676	196.892
Shisa2	7.89591e-05	0.141697	0.196	0.075	1.23745
B4gat1	0.000339604	0.141604	0.502	0.317	5.27337
Apba2	0.00102983	0.141602	0.549	0.377	15.8162
Mtfr1l	0.000304043	0.141534	0.404	0.238	4.72574
Pgk1	0.000475735	0.141096	0.672	0.491	7.3639
Zmat3	0.00273371	0.140926	0.447	0.299	41.3747
Selenof	0.00206122	0.140843	0.668	0.53	31.3553
Tmem246	0.00685477	0.140432	0.511	0.367	101.403
Adcy5	0.000451243	0.140131	0.587	0.384	6.98839
C2cd2l	0.00300611	0.140038	0.506	0.349	45.4554
Eif4b	0.0039691	0.139903	0.8	0.669	59.6158
Dynlrb1	0.00479752	0.139528	0.864	0.74	71.6942
mt-Co3	7.72799e-10	0.139479	1	1	1.23146e-05
Specc1	0.000652264	0.139467	0.409	0.249	10.0651
Ptprs	0.000267659	0.139108	0.936	0.851	4.1637
Nceh1	0.000601425	0.138903	0.506	0.327	9.29022
Tpt1	0.000372616	0.138885	0.983	0.954	5.78076
Ndufa2	0.000226779	0.138341	0.97	0.915	3.53117
Idh3a	0.00206564	0.138028	0.732	0.562	31.4184
Slc32a1	0.000980963	0.137848	0.894	0.758	15.0764
Iqsec1	0.0105337	0.137624	0.566	0.431	153.666
Mcrip1	0.00819623	0.137535	0.736	0.562	120.583
Wdr26	0.00141403	0.137521	0.643	0.441	21.6318
Pitpna	0.0134345	0.137267	0.694	0.601	194.008
Lhfpl4	0.00144515	0.137187	0.809	0.616	22.1035
Fam107a	7.58793e-05	0.136772	0.281	0.132	1.18941
Dlat	0.000547616	0.136687	0.523	0.349	8.46614
Rnf208	0.00137987	0.136179	0.783	0.619	21.119
Carm1	0.000172844	0.136065	0.315	0.164	2.69671
Mrfap1	0.000404615	0.135657	1	0.979	6.27314
Unc13a	0.000641789	0.13565	0.519	0.349	9.90538
Scarb2	0.00129269	0.135644	0.596	0.406	19.8001
Aifm3	0.000480327	0.135003	0.345	0.192	7.43451
Svop	0.0017352	0.134966	0.723	0.544	26.4757
Atp5a1	0.00117072	0.134857	0.915	0.815	17.9612
Chrnb2	0.000429366	0.134849	0.494	0.299	6.65303
Adgrb1	0.00455991	0.134826	0.591	0.423	68.2391
Fasn	0.00012309	0.13472	0.566	0.349	1.92438
Vamp1	0.00987642	0.134552	0.336	0.228	144.413
Grsf1	0.000751251	0.134523	0.57	0.377	11.5768
Pank3	4.99461e-05	0.134257	0.451	0.253	0.784603
Map2	0.000314946	0.134247	0.991	0.932	4.89331
Gatad2b	0.00822117	0.134229	0.774	0.673	120.925
Fbxl17	0.000115299	0.134176	0.396	0.221	1.80351
Psme3	0.0018415	0.134117	0.519	0.37	28.0773
Park2	0.000258216	0.133987	0.374	0.206	4.01758
Purb	0.00477435	0.133647	0.911	0.822	71.3621
Golga7b	0.000833965	0.13356	0.63	0.441	12.8364
Sh3gl2	0.0124601	0.132844	0.689	0.537	180.733
Ergic1	0.00813676	0.132737	0.647	0.491	119.757
Ank1	0.000391479	0.13246	0.277	0.146	6.07106
Got2	0.00816608	0.132428	0.732	0.623	120.164
Glyr1	0.0348568	0.132369	0.745	0.637	477.295
Neu1	0.00074625	0.132245	0.332	0.199	11.5005
Mrps18a	0.00387957	0.132137	0.519	0.363	58.3177
Gm26782	0.00406793	0.132055	0.574	0.406	61.0759
Ccdc97	0.000602453	0.132019	0.319	0.178	9.3055
Stx1b	0.0128627	0.131966	0.838	0.726	186.264
Chmp1a	0.000523524	0.131897	0.417	0.249	8.0963
Ankrd13c	0.000640024	0.13188	0.528	0.338	9.87876
Ppp2r5b	0.000757594	0.131838	0.506	0.335	11.6715
Gde1	0.00172845	0.131803	0.638	0.441	26.3744
Pebp1	0.00357235	0.13152	0.936	0.847	53.8068
Capzb	0.00179771	0.131159	0.757	0.577	27.4186
Setx	0.000233998	0.131145	0.502	0.302	3.64241
Slit1	7.3836e-05	0.130944	0.213	0.089	1.15745
Asphd2	0.0145157	0.130909	0.489	0.363	208.764
Hcn2	0.000142014	0.130898	0.272	0.132	2.21883
Ppp2ca	0.000138944	0.130762	0.872	0.772	2.17142
Rab7	0.00228129	0.130644	0.851	0.715	34.655
Pitpnc1	0.0110463	0.130578	0.583	0.431	160.878
Fam3c	0.000753053	0.130535	0.43	0.26	11.6038
Tmem150c	0.00115634	0.130375	0.421	0.267	17.7441
Tesk1	0.000178442	0.130305	0.379	0.206	2.78352
Dlg4	0.0274862	0.130286	0.915	0.786	382.718
Timp2	0.00579723	0.130212	0.979	0.936	86.1585
C1qbp	0.00121615	0.130113	0.506	0.335	18.6399
Gpat4	0.000244742	0.13003	0.43	0.249	3.80867
Ola1	0.00187444	0.129865	0.617	0.431	28.5646
Plekhb2	0.0088923	0.129804	0.894	0.804	130.503
Gpd2	0.00117484	0.129622	0.6	0.42	18.022
Slc35f4	0.000211093	0.129546	0.255	0.121	3.28967
Clip2	0.000648094	0.129515	0.349	0.196	10.002
Mlf2	0.0130342	0.129495	0.817	0.701	188.591
Limk1	0.00235405	0.129382	0.46	0.306	35.7392
Fam214b	0.000463185	0.129309	0.383	0.214	7.17195
Slitrk5	0.00422444	0.129142	0.643	0.466	63.3624
Naaa	7.22136e-05	0.128849	0.302	0.142	1.13209
Myrip	0.00018666	0.128616	0.196	0.082	2.91078
Aen	6.66858e-05	0.128504	0.268	0.125	1.04583
Ube2v2	0.000756389	0.12816	0.779	0.616	11.6544
Zmat4	0.010442	0.128136	0.481	0.37	152.369
Mapk10	0.00968897	0.128135	0.685	0.53	141.788
Ywhae	5.05267e-05	0.128035	0.991	0.961	0.793674
Ankrd40	0.00180567	0.127561	0.362	0.217	27.5383
Gorasp2	0.00186833	0.127391	0.553	0.359	28.4734
Baiap3	0.00239312	0.127355	0.94	0.851	36.3156
Dhcr7	0.000313974	0.127267	0.268	0.135	4.87884
Uqcc2	0.00347226	0.127195	0.902	0.73	52.3374
Zfp385b	0.000660997	0.126933	0.319	0.178	10.1979
Baalc	0.00230555	0.126727	0.451	0.285	35.019
Lcmt1	0.00062664	0.12603	0.54	0.345	9.67407
Shisa6	0.000119921	0.126025	0.157	0.053	1.8752
Rbfox3	0.00257344	0.12556	0.855	0.712	38.9928
Etnk1	0.00382181	0.125534	0.936	0.808	57.4685
Ucp2	0.00465587	0.125373	0.243	0.139	69.6285
Emb	0.00233194	0.125339	0.421	0.27	35.4105
Spcs3	0.000383077	0.125173	0.319	0.174	5.9419
Psmb4	0.00126069	0.125136	0.681	0.498	19.3138
Syn1	0.0122741	0.124969	0.796	0.669	178.147
Max	0.000924317	0.124656	0.553	0.359	14.2132
Hsbp1	0.00337013	0.124634	0.915	0.804	50.835
Nsg1	0.0285767	0.124588	0.974	0.936	395.845
Klf9	0.00194295	0.12435	0.43	0.278	29.5852
5730409E04Rik	0.00143653	0.124138	0.413	0.249	21.9745
Gosr2	0.00464464	0.124131	0.443	0.299	69.4745
Tnxb	1.01693e-05	0.124068	0.102	0.014	0.160421
Fam199x	0.000717521	0.123997	0.379	0.224	11.0635
Eif3f	0.00746145	0.12392	0.957	0.904	110.071
Ivns1abp	0.00441375	0.123884	0.374	0.238	66.1179
Tmem240	0.000364904	0.123135	0.345	0.185	5.66294
Rai1	0.00341362	0.123058	0.511	0.345	51.4672
Cep19	0.00407784	0.122937	0.553	0.384	61.2206
Calm1	0.000210295	0.122857	1	0.993	3.27787
Bap1	0.0202056	0.12283	0.374	0.263	285.686
Calr	0.000574936	0.122812	0.906	0.74	8.88506
Ran	0.00814911	0.122707	0.923	0.836	119.93
Rpl38	2.24806e-05	0.12244	1	1	0.354001
Pomgnt1	0.00015859	0.122373	0.404	0.217	2.47607
Eps15	0.00251421	0.12234	0.528	0.352	38.1155
Chpt1	0.0105887	0.122281	0.438	0.324	154.436
Hspa12a	0.000957665	0.122259	0.523	0.338	14.7203
Ccny	0.000343552	0.122208	0.345	0.189	5.33434
Nsmf	8.98085e-05	0.122145	0.4	0.217	1.40676
Lcorl	0.00557316	0.122134	0.323	0.203	82.9007
Rps6	0.000500603	0.121962	1	1	7.74582
Tulp4	0.00319886	0.121932	0.898	0.79	48.3059
Tspyl2	0.0142218	0.121869	0.843	0.715	204.651
Fam20c	0.000333061	0.121856	0.404	0.235	5.17278
Akt1	0.00335987	0.121837	0.54	0.381	50.6837
D5Ertd579e	0.00199504	0.121794	0.532	0.363	30.3705
Rspo1	0.0095235	0.121774	0.349	0.246	139.472
Sacs	0.00125161	0.121757	0.357	0.21	19.176
Nampt	9.47275e-05	0.121722	0.323	0.164	1.48362
5031439G07Rik	0.000986906	0.121633	0.519	0.331	15.1638
Xrcc3	9.63056e-06	0.121406	0.17	0.05	0.151951
Tex2	0.00167584	0.121394	0.523	0.349	25.5817
Sptan1	0.0704062	0.121237	0.749	0.669	896.623
Tmem164	8.60234e-06	0.120875	0.23	0.082	0.135754
Tuba1b	0.00423938	0.120478	0.966	0.911	63.5737
Hyou1	6.08476e-05	0.120345	0.268	0.117	0.954881
Rab2a	0.00895351	0.12023	0.864	0.776	131.357
Ptprm	0.0013835	0.120094	0.374	0.228	21.1717
Mapk8ip1	0.00431795	0.11994	0.787	0.609	64.7131
Dst	0.00540582	0.119922	0.906	0.722	80.4764
Habp4	0.00443317	0.119853	0.817	0.673	66.4001
Hsp90b1	0.0128111	0.119767	0.817	0.747	185.543
Tkt	0.0333087	0.119397	0.434	0.32	457.262
Gpr153	0.000108847	0.119029	0.285	0.135	1.70335
Ppm1f	0.00117255	0.11899	0.434	0.267	17.9881
Acat2	0.00359221	0.118972	0.43	0.288	54.0986
H1f0	0.00135462	0.118902	0.404	0.246	20.7392
Stk25	0.0189479	0.118891	0.715	0.566	268.737
Uqcrb	0.00822176	0.118788	0.817	0.644	120.926
Smyd2	0.00251329	0.118672	0.455	0.31	38.1041
Dnaja2	0.00962313	0.118585	0.689	0.548	140.854
Ccdc136	0.00622423	0.118555	0.502	0.367	92.3427
Etf1	0.00554353	0.11851	0.494	0.356	82.4933
Ids	0.064458	0.118469	0.872	0.808	831.379
Syt3	0.00050908	0.118415	0.285	0.149	7.87547
Ttc19	0.00666908	0.118351	0.8	0.673	98.769
Gramd1b	0.00615876	0.118309	0.362	0.238	91.4145
5930430L01Rik	0.00132271	0.118233	0.196	0.096	20.2533
Abca2	0.0110838	0.118125	0.634	0.48	161.368
Ttbk2	0.00272483	0.118082	0.787	0.662	41.2457
Sptbn2	2.94556e-05	0.117895	0.387	0.192	0.463484
Trmt10a	0.00790023	0.117793	0.217	0.128	116.386
Apc2	0.016366	0.117645	0.57	0.416	233.904
Rpl10a	0.00203761	0.117478	0.996	0.996	31.0084
Ndufc1	0.00537123	0.117441	0.881	0.744	79.9991
Chn1	0.0200262	0.117371	0.791	0.648	283.31
Mllt11	0.00256999	0.117299	0.966	0.929	38.9431
Gdap1l1	0.000508145	0.117297	0.434	0.263	7.86152
Epm2aip1	0.0184529	0.117157	0.881	0.801	262.086
Ppp1r9b	0.000592979	0.117109	0.591	0.381	9.16153
Ppp1r14b	0.000395426	0.116895	0.238	0.117	6.13148
Asic1	0.00748618	0.11688	0.421	0.295	110.421
Gm2a	0.00067272	0.116855	0.213	0.1	10.3767
Nefl	0.00556672	0.11682	0.677	0.527	82.8105
Kcnf1	0.00242574	0.116819	0.23	0.125	36.8057
Cobl	0.00516988	0.116809	0.349	0.228	77.1087
Sphkap	0.0153079	0.116557	0.472	0.331	219.47
Otub1	0.00967756	0.116484	0.851	0.73	141.631
Tmem160	0.00053526	0.116272	0.294	0.157	8.27726
Adarb1	0.00390972	0.116255	0.455	0.306	58.7435
R3hdm4	0.00121525	0.116127	0.383	0.228	18.6274
Slc9a8	9.74135e-05	0.116119	0.26	0.117	1.5255
Ppm1a	0.00539513	0.116102	0.928	0.868	80.3442
Nt5c3	0.000588702	0.116091	0.477	0.288	9.09604
Psap	0.0018158	0.116061	0.983	0.964	27.6891
Ndufs4	0.00292649	0.115854	0.562	0.367	44.2632
Ryr2	0.00679303	0.11574	0.502	0.349	100.516
Tgfb2	0.0159172	0.115553	0.111	0.053	227.79
Gadd45a	7.73867e-05	0.115477	0.187	0.068	1.21296
Fndc9	0.013591	0.11544	0.502	0.37	196.145
Nefm	0.00537087	0.115434	0.264	0.16	79.9991
Snph	0.000497733	0.115189	0.523	0.327	7.70192
Npdc1	0.0144921	0.114781	0.728	0.605	208.44
Atp6v0e2	0.00366001	0.114613	0.889	0.797	55.0759
Tmbim6	0.00417708	0.114566	0.826	0.673	62.6604
Dlg3	0.00242711	0.114528	0.434	0.281	36.8241
Edf1	0.0139555	0.114477	0.672	0.512	201.225
Prelid1	0.00479799	0.114417	0.583	0.384	71.6963
Ctif	0.00843252	0.114414	0.574	0.416	123.958
Coq10a	0.000272648	0.114322	0.277	0.139	4.24076
Map3k5	0.00671764	0.114156	0.272	0.171	99.4412
Scd1	0.000110152	0.114147	0.174	0.064	1.72345
Pak1ip1	0.0106232	0.114063	0.391	0.27	154.908
Eif4e2	0.000729589	0.11406	0.379	0.221	11.2459
Rgs19	0.00131681	0.114018	0.294	0.167	20.1644
Ap2a1	0.00665698	0.114017	0.472	0.335	98.6032
Smap2	0.00379216	0.113714	0.668	0.488	57.0341
Dzip1	0.00526121	0.11362	0.532	0.363	78.4341
Kctd17	0.00334486	0.113434	0.443	0.285	50.4606
Nfe2l1	0.00484884	0.113427	0.902	0.726	72.4271
Tmem258	0.00124141	0.113394	0.353	0.199	19.0209
Slc35a2	0.000105903	0.113388	0.323	0.157	1.6576
Nkiras1	0.00099595	0.113269	0.417	0.242	15.2998
Map9	0.0149571	0.113253	0.655	0.53	214.739
Ablim3	0.000334028	0.113142	0.349	0.189	5.18712
Whamm	0.000176378	0.11303	0.23	0.1	2.7515
Dpp6	0.0047889	0.113016	0.894	0.797	71.5701
Elp3	0.00605232	0.112892	0.506	0.363	89.8649
Creb3l1	1.32866e-05	0.112872	0.085	0.007	0.209516
Rrn3	0.00225679	0.112861	0.515	0.335	34.2874
Tac2	0.0351301	0.112839	0.094	0.046	480.791
Reep2	0.00808377	0.11283	0.638	0.477	119.001
Vdac1	0.0243703	0.112799	0.791	0.687	341.599
Aff4	0.012768	0.112776	0.906	0.808	184.945
Lhfpl3	0.000425594	0.112519	0.409	0.238	6.595
Actr3	0.0100295	0.112407	0.753	0.605	146.562
Nuak1	0.0125423	0.112401	0.379	0.26	181.838
Slc7a5	0.00015864	0.11229	0.2	0.082	2.47669
Tcf25	0.0117404	0.112228	0.974	0.929	170.659
Ctps	0.00051746	0.112158	0.345	0.192	8.00408
Eno1	0.0125373	0.112046	0.455	0.324	181.778
Gabarap	0.00621344	0.112045	0.877	0.74	92.1888
Arxes1	0.00340188	0.111996	0.447	0.292	51.297
Yaf2	0.00431375	0.111664	0.562	0.388	64.6545
Cpe	0.0151071	0.111497	0.945	0.907	216.771
Rplp0	0.0179546	0.111407	0.987	0.925	255.368
Stk39	0.00353318	0.111229	0.396	0.256	53.2451
Sema6b	0.0170721	0.111165	0.502	0.37	243.345
Ndufb6	0.00328241	0.111126	0.506	0.335	49.5512
Tor1aip2	0.00426913	0.111117	0.413	0.274	64.0113
Whrn	0.00630198	0.111112	0.226	0.128	93.4709
Lamb3	9.96849e-05	0.111094	0.115	0.028	1.56067
Arglu1	0.0261207	0.111043	0.877	0.737	364.672
Rpl18	0.0124146	0.111031	0.983	0.979	180.123
Stxbp1	0.0152527	0.111016	0.991	0.972	218.724
Rap1gds1	0.0465761	0.110959	0.647	0.544	623.794
Ndufa1	0.00355521	0.11095	0.685	0.488	53.5521
Txndc17	0.0144888	0.110845	0.689	0.516	208.407
Rrp7a	0.0149059	0.110611	0.545	0.416	214.048
Phlda3	0.0661169	0.110607	0.468	0.37	850.197
Rundc3a	0.0125041	0.110585	0.757	0.612	181.322
Rac3	0.0108349	0.11056	0.579	0.423	157.854
Mrpl34	0.000355788	0.110482	0.353	0.192	5.52254
E130307A14Rik	0.000828336	0.110433	0.396	0.231	12.7506
Tmem26	6.87902e-05	0.110401	0.145	0.043	1.07856
Snd1	0.00380345	0.110378	0.328	0.203	57.2
Dnah1	0.000784695	0.110118	0.23	0.114	12.0851
Arf2	0.00138354	0.110041	0.362	0.217	21.1709
Gabra5	0.00547561	0.109855	0.413	0.274	81.4989
Ccm2	0.0011994	0.109812	0.345	0.196	18.3892
Pfas	0.00654924	0.109624	0.311	0.199	97.0401
Cog3	3.69456e-05	0.109548	0.174	0.057	0.580821
Frmd5	0.000797369	0.109532	0.217	0.103	12.2787
Ndufs6	0.0471411	0.109317	0.698	0.562	630.889
Eef1b2	0.00129587	0.109106	0.979	0.915	19.8476
Mark4	0.00121158	0.109023	0.328	0.189	18.5723
Lrp11	0.00117949	0.108934	0.523	0.352	18.0923
Svbp	0.00339386	0.108568	0.464	0.324	51.1794
Ryr3	0.000466741	0.108438	0.281	0.142	7.22608
Dnajc15	0.00531895	0.108353	0.519	0.356	79.2576
Scoc	0.000982148	0.108319	0.962	0.875	15.0927
Neto2	0.0260468	0.108048	0.345	0.253	363.691
Ube2ql1	0.0120386	0.107747	0.54	0.399	174.825
Dda1	0.00954353	0.107681	0.689	0.527	139.746
Mapk8ip3	0.0168534	0.107674	0.851	0.708	240.38
Wipi2	0.00888536	0.107674	0.719	0.552	130.41
Ifngr2	0.00164879	0.10766	0.328	0.196	25.1754
Fam57b	0.00308779	0.107642	0.349	0.221	46.6688
Sptbn1	0.00787888	0.107642	0.953	0.9	116.087
Xkr6	0.000898001	0.107599	0.234	0.117	13.8113
Amz1	6.82106e-05	0.107513	0.243	0.1	1.06961
Usp46	0.0242732	0.107472	0.549	0.409	340.334
Rtn3	0.00196962	0.107352	0.996	0.982	29.9894
Cacul1	0.021023	0.107328	0.613	0.463	296.677
Il1rap	0.00450858	0.107295	0.438	0.292	67.4889
Spred3	0.000675122	0.107267	0.319	0.171	10.4131
Slc36a4	0.0326618	0.107267	0.532	0.427	448.773
Eif4g1	0.00867504	0.10708	0.668	0.491	127.376
Dvl1	0.000220201	0.106836	0.374	0.206	3.43008
Ric3	0.0279423	0.10661	0.515	0.402	388.37
Gadd45gip1	0.0101791	0.106583	0.506	0.367	148.645
Mtor	0.0156358	0.106298	0.37	0.256	223.874
Timm29	0.00931399	0.106294	0.464	0.324	136.469
Kctd10	0.00521296	0.106127	0.345	0.221	77.7357
Me1	0.00485145	0.106104	0.298	0.181	72.4564
Borcs5	0.00355393	0.106098	0.251	0.142	53.5364
Map1b	0.000865248	0.10608	1	0.989	13.3144
Camkk1	0.0221085	0.10607	0.396	0.295	311.222
Vps13b	0.00208185	0.105966	0.349	0.206	31.6607
Dclk1	0.0156081	0.105963	0.94	0.843	223.508
Grin2a	0.00184159	0.105919	0.328	0.196	28.0768
Caskin1	0.00673012	0.105889	0.574	0.42	99.6192
Cmpk1	0.0236283	0.105819	0.6	0.459	331.647
Gdi1	0.00937429	0.105678	0.962	0.904	137.324
Gm19412	0.0010308	0.10563	0.349	0.206	15.8301
Actr1b	0.0491981	0.105612	0.668	0.569	656.155
Fam217b	0.00864779	0.105559	0.532	0.384	127.01
Foxk2	0.00332692	0.105508	0.362	0.224	50.1999
Ppp2r2c	0.0117815	0.105387	0.86	0.722	171.233
Acd	0.00314738	0.105336	0.277	0.157	47.5507
Clstn2	0.00916146	0.105264	0.281	0.174	134.289
Stard4	0.00576085	0.105167	0.302	0.185	85.635
Fbxo31	0.0049769	0.105145	0.353	0.221	74.2802
Eif3b	0.00333403	0.105107	0.426	0.281	50.3006
Fbxo9	0.0653486	0.105037	0.774	0.662	841.428
Phb	0.00797479	0.104905	0.46	0.32	117.453
Fem1a	9.7673e-05	0.104804	0.298	0.139	1.52946
Adgrb2	0.0129728	0.104745	0.511	0.37	187.755
Tmem87b	0.00123022	0.104697	0.409	0.242	18.8544
Dusp3	0.00699746	0.104523	0.626	0.452	103.464
Tmod2	0.0073383	0.104455	0.915	0.836	108.321
Taf9b	0.00188479	0.104241	0.302	0.174	28.7148
Nova1	0.0244136	0.104179	0.621	0.47	342.132
Necab2	0.000167946	0.104155	0.221	0.093	2.62114
Pfkfb3	0.00191964	0.104154	0.183	0.089	29.238
Tmem38a	0.00692185	0.104043	0.319	0.203	102.374
Hsph1	0.00568584	0.104006	0.889	0.772	84.5542
Pwwp2a	0.0108674	0.103957	0.357	0.238	158.316
Canx	0.021491	0.103952	0.991	0.925	302.98
Tbc1d22b	0.0041562	0.103912	0.323	0.199	62.3679
Sin3b	0.0157119	0.10383	0.536	0.384	224.916
Wbp1l	4.09502e-05	0.103784	0.179	0.06	0.643615
Nudt19	0.0127028	0.103748	0.583	0.456	184.088
Pdia3	0.0217343	0.103641	0.54	0.402	306.301
Uhmk1	0.0154535	0.103592	0.779	0.648	221.465
Arl4c	0.0340714	0.103583	0.685	0.555	467.187
U2af2	0.00738241	0.103531	0.587	0.427	108.935
Rnf145	0.0218902	0.103358	0.481	0.352	308.236
Dync1li1	0.0131137	0.103295	0.63	0.484	189.651
Astn1	0.0200575	0.103162	0.932	0.833	283.713
Wnk3	0.0184838	0.103157	0.443	0.317	262.506
Ezr	0.0018652	0.1031	0.149	0.064	28.4275
Asb8	0.00158517	0.103043	0.336	0.192	24.2182
Rab3c	0.186012	0.102951	0.911	0.847	1984
AI593442	0.0127629	0.102908	0.562	0.431	184.883
Rab15	0.00573879	0.102855	0.545	0.391	85.3128
BC029722	0.0167708	0.102839	0.877	0.765	239.286
Usp32	0.010711	0.102827	0.609	0.463	156.146
Slc2a6	7.94559e-05	0.102586	0.123	0.032	1.24507
Capn2	0.00834352	0.102468	0.306	0.203	122.691
Dnajc19	0.00463282	0.102433	0.532	0.356	69.3023
Ubald1	0.00332725	0.102411	0.447	0.292	50.2016
Ncor2	0.00447527	0.102252	0.583	0.409	67.0216
Lingo1	0.0127841	0.102239	0.417	0.292	185.164
Dock4	0.00249822	0.102221	0.387	0.249	37.8805
Tomm20	0.00255517	0.102172	0.966	0.9	38.7237
Dapk1	0.0416851	0.10217	0.515	0.391	563.416
Slc43a2	0.000672672	0.102158	0.243	0.121	10.3766
Ppme1	0.0129009	0.102052	0.766	0.598	186.779
Eml2	0.0323727	0.101932	0.694	0.569	445.287
Nf1	0.0150731	0.10187	0.583	0.445	216.299
Npm1	0.000302742	0.101846	0.991	0.986	4.70582
Oaz2	0.00465099	0.101769	0.919	0.843	69.5602
Spg20	0.0053076	0.101514	0.345	0.214	79.0991
Cygb	0.0180688	0.101498	0.609	0.452	256.939
Acox1	0.0183957	0.101378	0.668	0.498	261.293
Rab12	0.00931252	0.101256	0.638	0.488	136.456
Srsf6	0.00794314	0.101249	0.609	0.445	117.002
Them6	0.000224641	0.101187	0.14	0.046	3.49812
Snrpn	0.0195269	0.101165	0.987	0.975	276.598
Mfng	0.00358483	0.101162	0.119	0.05	53.9912
Camta2	0.0268064	0.101105	0.417	0.313	373.655
Gatad1	0.0355195	0.100852	0.63	0.516	485.907
Wars	0.00302084	0.100808	0.421	0.274	45.6751
Sgsm3	0.00412847	0.1008	0.26	0.146	61.9683
Bpgm	0.0145876	0.100796	0.311	0.206	209.712
Cyhr1	0.00440031	0.100686	0.677	0.495	65.9298
Nfia	0.0738464	0.100596	0.102	0.06	936.076
Sgta	0.0138483	0.100564	0.557	0.413	199.761
Rnf126	0.00554678	0.100498	0.396	0.26	82.5305
Polr3k	0.00945826	0.10042	0.502	0.367	138.535
Glrx2	0.0167525	0.100399	0.464	0.338	239.058
Gria3	0.00416393	0.100392	0.587	0.42	62.4756
Agtpbp1	0.0248974	0.100376	0.587	0.441	348.39
Srcin1	0.0195971	0.100362	0.753	0.633	277.475
Ltbp3	0.00138947	0.100359	0.298	0.16	21.2603
Abhd17a	0.00567295	0.100192	0.511	0.338	84.3682
Naa38	0.0107964	0.100165	0.596	0.431	157.314
Rmst	0.109333	0.100077	0.621	0.534	1321.18
Smpd1	0.0071555	0.100018	0.409	0.27	105.737
Ypel2	0.00300228	0.0999541	0.345	0.214	45.4005
Pef1	0.00331469	0.0999081	0.34	0.21	50.0187
Cbarp	0.00669226	0.099853	0.996	0.982	99.0789
Cyb5b	0.0123124	0.09978	0.711	0.562	178.665
Elovl5	0.000931582	0.0997282	0.349	0.203	14.324
Adam23	0.0202442	0.0995527	0.519	0.377	286.213
Ppp1r37	0.00520731	0.0995115	0.387	0.246	77.6566
Kcns2	0.0145369	0.0994456	0.332	0.224	209.011
Ank	0.00415653	0.0994427	0.426	0.281	62.3688
Eloc	0.016558	0.099436	0.757	0.577	236.498
Gadd45g	0.00217635	0.0993825	0.2	0.1	33.0827
Itpr1	0.00774741	0.0993175	0.234	0.135	114.189
Fam189a2	0.00184335	0.0992551	0.2	0.1	28.1019
Rpl36a	0.0116178	0.0990325	1	0.996	168.923
Rtcb	0.0371313	0.0990258	0.664	0.505	506.396
Nelfcd	0.000117036	0.0988864	0.247	0.107	1.83044
Mapre3	0.00580467	0.0987927	0.702	0.537	86.2632
Ralgps2	0.0195371	0.0986825	0.536	0.395	276.704
Gapdh	0.0471613	0.0986679	0.804	0.701	631.112
Ppfia3	0.00225888	0.098661	0.451	0.288	34.3169
1110065P20Rik	0.00766426	0.098647	0.774	0.584	112.994
Fam214a	0.00479913	0.0985146	0.366	0.231	71.7085
Ctsd	0.0103256	0.0984364	0.689	0.523	150.733
Smarcc2	0.00752545	0.0984001	0.813	0.63	110.985
H1fx	0.00123657	0.0983998	0.332	0.185	18.9492
Srsf12	0.00599704	0.0983951	0.409	0.267	89.0561
Rnf14	0.0525718	0.0983498	0.889	0.74	696.313
Sec22b	0.00818644	0.0982999	0.438	0.31	120.447
Dnal1	0.00821689	0.0982968	0.515	0.356	120.87
Bex2	0.0152887	0.0982577	0.983	0.954	219.209
Ap1s1	0.00315728	0.0980266	0.787	0.58	47.6908
1110051M20Rik	0.0154763	0.0979884	0.451	0.32	221.744
Dtx1	0.0201176	0.0979202	0.566	0.413	284.524
Chtop	0.0398087	0.0978051	0.638	0.512	540.602
Snf8	0.066786	0.0978001	0.57	0.459	857.666
6430548M08Rik	0.00724724	0.0977688	0.681	0.498	107.027
Kalrn	0.00616013	0.0976373	0.702	0.505	91.4287
Fut9	0.0204546	0.0975866	0.711	0.544	289.024
Smim7	0.00262509	0.0975847	0.447	0.281	39.7675
Efr3b	0.00431341	0.0974652	0.498	0.338	64.6537
Caprin1	0.0101888	0.0973577	0.843	0.765	148.777
Samd10	0.000796572	0.0973081	0.238	0.117	12.2672
Slk	0.00274547	0.0972904	0.217	0.114	41.5499
Afg3l2	0.00385935	0.0972146	0.264	0.157	58.0253
Sacm1l	0.0102002	0.0971938	0.477	0.331	148.923
Atg9a	0.00231875	0.097155	0.477	0.327	35.2149
Inpp5f	0.0861403	0.0971313	0.894	0.801	1073.39
Aldoc	0.230738	0.0971237	0.404	0.359	2299.31
Mpp2	0.0389162	0.097038	0.46	0.349	529.338
Get4	0.00864685	0.0969882	0.336	0.214	127.005
Ap2m1	0.0149114	0.0969574	0.864	0.733	214.113
Cdh22	0.00160504	0.0967452	0.247	0.132	24.5185
Celsr2	0.0321075	0.0966178	0.553	0.434	441.896
Cntnap4	0.00984055	0.0965271	0.545	0.381	143.908
Abcf1	0.0398988	0.0964821	0.391	0.292	541.706
Rab40b	0.00308326	0.0962347	0.191	0.096	46.6035
Ncan	0.0145602	0.0959433	0.285	0.185	209.333
Metap1	0.00700526	0.0958517	0.511	0.345	103.573
Kctd2	0.0101747	0.0955946	0.374	0.249	148.591
Slc35b4	0.00170007	0.0955559	0.328	0.189	25.9498
Gm42067	0.000834494	0.0955102	0.294	0.153	12.8437
Idh3b	0.285058	0.0954996	0.685	0.594	2447.22
Usp50	0.0084902	0.0954313	0.447	0.299	124.763
Bcl2l13	0.0012365	0.09539	0.221	0.11	18.9493
Wwc1	0.000330129	0.0953666	0.221	0.1	5.12757
Sde2	0.00115879	0.0953601	0.374	0.214	17.7793
Mrpl10	0.0105544	0.0953115	0.4	0.267	153.957
Rpl37	5.07906e-05	0.0952865	1	1	0.797767
Map2k1	0.025443	0.0952839	0.796	0.694	355.617
Trpm2	0.00100459	0.0952059	0.247	0.125	15.4306
Ctnnbip1	0.00390999	0.095188	0.489	0.335	58.7437
Eif1a	0.0125858	0.0951556	0.583	0.431	182.443
Gtf2a1	0.0151688	0.0950907	0.438	0.31	217.566
Hpcal4	0.0223357	0.0950768	0.83	0.698	314.196
Naxe	0.000948608	0.0950511	0.328	0.189	14.5839
Vps52	0.00119019	0.094997	0.23	0.114	18.2515
Ube2h	0.00464816	0.0949924	0.591	0.402	69.5225
R3hdm2	0.0224858	0.0949166	0.447	0.317	316.24
Pex6	0.00634669	0.09486	0.23	0.132	94.1214
Arhgef7	0.0348603	0.0948547	0.566	0.438	477.307
Ppfia4	0.00177809	0.0947738	0.443	0.267	27.1248
Cib2	0.0188644	0.0946879	0.715	0.559	267.649
Zfp597	0.00426717	0.0946875	0.277	0.16	63.9862
Atp6v0d1	0.0130199	0.0944682	0.694	0.516	188.398
Dmrtc1a	0.00328283	0.0944578	0.187	0.093	49.5543
Ppp1cb	0.0256626	0.094361	0.877	0.772	358.558
Sesn2	0.000243339	0.0943011	0.14	0.046	3.78733
Ap3b2	0.0164923	0.0942747	0.426	0.295	235.626
Rab5c	0.00233269	0.0941938	0.455	0.288	35.4196
Aars	0.0197396	0.0941763	0.362	0.253	279.434
Clcn7	0.00802352	0.0940864	0.332	0.214	118.146
Dmtn	0.0275766	0.0940541	0.719	0.537	383.922
Cic	0.017791	0.0940466	0.426	0.302	253.148
Mrpl17	0.0153866	0.0940396	0.46	0.32	220.567
Nipsnap2	0.00639493	0.0938519	0.434	0.288	94.8113
Mlst8	0.0001397	0.0938267	0.204	0.082	2.18282
Ogdh	0.011859	0.09382	0.719	0.559	172.323
Sema5a	0.0309419	0.0937469	0.23	0.149	426.72
Tbc1d30	0.013808	0.0937151	0.353	0.235	199.194
Snap47	0.095127	0.093658	0.847	0.733	1169.59
Dleu7	0.00648979	0.0936335	0.217	0.125	96.1722
Clptm1	0.013415	0.0936201	0.515	0.399	193.767
Tbpl1	0.00472851	0.0934841	0.536	0.352	70.7054
Wdr1	0.0132913	0.0934812	0.651	0.498	192.046
Eif4e	0.0239821	0.0934499	0.779	0.655	336.446
Gipc1	0.00324366	0.0934452	0.179	0.089	48.976
Sh3rf1	0.00307193	0.0932999	0.302	0.178	46.4384
Rtl8b	0.0437739	0.0932975	0.872	0.783	589.634
Ppdpf	0.0436648	0.0932261	0.63	0.509	588.296
Shank1	0.045615	0.0932166	0.732	0.63	611.879
Hspe1	0.00972948	0.0932065	0.945	0.819	142.362
Rap1gap	0.0437435	0.0931712	0.655	0.523	589.312
Clmp	0.0269779	0.0931622	0.481	0.352	375.991
Lrp3	0.0011136	0.0931479	0.434	0.26	17.0927
Ahcyl1	0.00581322	0.0930399	0.574	0.402	86.3845
St3gal3	0.00072459	0.093036	0.238	0.117	11.171
Ap1ar	0.00725648	0.0930282	0.689	0.509	107.156
Fads3	0.0014422	0.0928904	0.174	0.078	22.0599
Plcb4	0.0167209	0.0928409	0.672	0.537	238.658
Htr1a	0.000492556	0.0928005	0.077	0.014	7.62328
Irs1	5.28665e-05	0.0927648	0.128	0.032	0.83011
Serinc5	0.0050874	0.0927175	0.174	0.089	75.8989
Shisa4	0.0061204	0.092641	0.57	0.409	90.8574
Faf1	0.00113082	0.0926162	0.285	0.149	17.3558
Tagap1	0.0160733	0.0926075	0.4	0.27	229.896
Mindy3	0.00534193	0.0925586	0.379	0.242	79.5841
Akr1a1	0.0413184	0.0925349	0.932	0.815	558.79
Gprasp1	0.00900254	0.0924964	0.979	0.947	132.04
Rgl2	0.000246038	0.0923939	0.26	0.121	3.8286
Hnrnpul2	0.0287161	0.0923358	0.766	0.655	397.632
Erich3	0.00604527	0.0921752	0.396	0.249	89.7663
Fbxo44	0.00854114	0.0921394	0.481	0.324	125.495
Ngef	0.0058851	0.092136	0.251	0.146	87.4291
Ajap1	0.00519843	0.092113	0.251	0.142	77.5294
Deaf1	0.00723212	0.092097	0.562	0.388	106.826
Actb	0.0117062	0.0920781	1	0.979	170.185
Scaf1	0.000654571	0.0919506	0.204	0.093	10.1
Acsl1	0.00986654	0.0919356	0.391	0.26	144.278
Fam20b	0.00671735	0.0919329	0.655	0.466	99.4437
Ncbp2	0.0355562	0.0918672	0.511	0.391	486.266
Abce1	0.0162366	0.0918347	0.443	0.317	232.151
Fam91a1	0.0157803	0.0917041	0.562	0.42	225.88
Fgd1	0.000184443	0.0915783	0.149	0.05	2.87657
Eno2	0.105517	0.0913115	0.932	0.858	1280.13
Psmb10	0.00667765	0.0912003	0.528	0.37	98.8826
Kcnip3	0.000103651	0.0910311	0.123	0.032	1.62255
Mboat2	0.00252386	0.0908928	0.285	0.16	38.2542
Mrpl58	0.00488069	0.0907864	0.328	0.203	72.8833
Pank1	0.0121152	0.090761	0.179	0.103	175.913
Qk	0.00474363	0.0907573	0.323	0.196	70.9125
Lrrfip2	0.0532463	0.0907181	0.421	0.32	704.501
Gemin7	0.00381743	0.0906046	0.506	0.338	57.4065
Cacnb1	0.0240572	0.0905882	0.319	0.221	337.403
Celsr3	0.0293993	0.090457	0.251	0.171	406.622
Rdh11	0.00454552	0.0903914	0.17	0.085	68.0328
Arl2	0.00646053	0.0903788	0.404	0.274	95.7516
Herc2	0.0909582	0.090378	0.672	0.552	1127.24
Mafg	0.032086	0.0903487	0.626	0.48	441.631
Pkp2	0.000309045	0.0902839	0.119	0.036	4.80318
Kdm3b	0.00678947	0.0902143	0.23	0.132	100.471
Dnm1	0.0372794	0.0901332	0.745	0.626	508.38
Tekt5	0.00126726	0.0901256	0.145	0.057	19.4132
Agfg2	0.0047746	0.0900843	0.319	0.192	71.3611
Gnptab	0.0238481	0.0900843	0.345	0.242	334.637
Strn4	0.0119853	0.090075	0.426	0.295	174.098
Mbd6	0.00991313	0.0900525	0.243	0.146	144.94
B9d1	0.000268569	0.0899905	0.187	0.075	4.17759
Tmem86a	6.83744e-06	0.0899776	0.115	0.018	0.107991
Dner	0.0813173	0.0899228	0.783	0.719	1020.94
Map3k10	0.00439643	0.0898879	0.413	0.253	65.8761
Wrnip1	0.00594125	0.0898333	0.413	0.267	88.2454
Btbd1	0.00414502	0.0897368	0.57	0.391	62.2085
Pacs1	0.0058345	0.0896798	0.387	0.242	86.6948
Lrrc55	0.00305302	0.0896696	0.238	0.132	46.1556
Snx17	0.00785435	0.0896259	0.37	0.238	115.734
Slc9a3r2	0.00315047	0.0895838	0.226	0.121	47.5942
Arhgef25	0.0314601	0.0894724	0.502	0.381	433.362
Igf2r	0.0114548	0.0894419	0.277	0.174	166.645
Nploc4	0.00682777	0.0894195	0.306	0.192	101.017
Daglb	0.00473469	0.0893671	0.191	0.1	70.7884
Upf1	0.0114874	0.0893557	0.306	0.203	167.108
Rcan2	0.0398826	0.0893455	0.872	0.751	541.526
Lman2	0.0147785	0.0893166	0.451	0.313	212.292
BC035947	0.00187846	0.0892803	0.14	0.057	28.624
Lrrc75b	0.011126	0.0891395	0.277	0.174	161.951
Serf2	0.0299725	0.0890657	0.974	0.907	414.07
Fabp5	0.0965889	0.0889747	0.574	0.466	1184.95
Gpx4	0.0154007	0.0889694	0.987	0.943	220.738
Copb2	0.00136307	0.0889555	0.272	0.146	20.8659
Zyg11b	0.0283935	0.0888418	0.774	0.626	394.3
Ap1b1	0.00270302	0.0888194	0.617	0.42	40.9237
Cul4a	0.016782	0.0887265	0.366	0.253	239.428
Gnpda1	0.0450488	0.0887056	0.281	0.192	605.095
Haus2	0.00244683	0.0885938	0.332	0.196	37.111
Ccndbp1	0.0144018	0.0885721	0.336	0.224	207.169
Eif4a1	0.0518171	0.0884503	0.851	0.74	687.146
Wdr41	0.00118778	0.0883674	0.255	0.132	18.217
Rad23b	0.0770957	0.0883628	0.8	0.73	973.487
Dgat2	0.00312108	0.0882768	0.209	0.11	47.1596
Srebf2	0.0434681	0.0881785	0.672	0.527	585.776
Rnf11	0.00202515	0.0881675	0.987	0.954	30.8208
Emc1	0.0179278	0.0881398	0.562	0.409	255.023
Kif2a	0.0276481	0.0880931	0.583	0.445	384.862
Nectin3	0.00428502	0.0880871	0.23	0.125	64.2325
Pla2g12a	0.00891293	0.0879425	0.438	0.281	130.788
Grb2	0.0633016	0.0878018	0.826	0.701	818.11
Erh	0.0130382	0.0877833	0.289	0.185	188.624
Tmem256	0.0323682	0.0877828	0.689	0.534	445.256
Glrb	0.0155311	0.0877117	0.689	0.516	222.498
2900097C17Rik	0.0218186	0.0876726	1	0.993	307.38
Atg3	0.0321514	0.0875129	0.306	0.206	442.467
Id2	0.00351383	0.087512	0.174	0.085	52.9605
Gatsl2	0.0368557	0.0874537	0.774	0.673	502.932
Sumo3	0.0101939	0.0873808	0.83	0.662	148.841
Slc30a9	0.0105224	0.0873786	0.843	0.701	153.511
Tnks	0.079149	0.0873652	0.489	0.384	996.644
Gnal	0.0398258	0.0873004	0.57	0.438	540.794
Ipcef1	0.00289943	0.0872126	0.243	0.132	43.8568
Tbca	0.00270234	0.0872096	0.966	0.911	40.9161
Poglut1	0.0208736	0.0871785	0.511	0.377	294.651
Raly	0.0237917	0.0871101	0.294	0.206	333.87
Opn3	0.00161206	0.0870572	0.166	0.075	24.6194
Ube2e2	0.0263333	0.0869968	0.609	0.484	367.534
Mkrn1	0.0251235	0.0868533	0.477	0.349	351.403
Pip5k1b	0.00220257	0.0867807	0.179	0.085	33.4791
Cntn1	0.10246	0.0866821	0.932	0.893	1247.66
Ccdc92	0.0576601	0.0866621	0.638	0.516	757.25
Trir	0.0164156	0.0865856	0.63	0.477	234.595
Cdc42se2	0.0203637	0.086571	0.643	0.448	287.82
Tmem132e	0.00854531	0.0865586	0.26	0.153	125.548
Grb10	0.0568674	0.086475	0.86	0.744	747.522
Ncs1	0.0111937	0.086445	0.851	0.708	162.902
Ctxn1	0.0520914	0.086425	0.945	0.879	690.471
Snx10	0.0261087	0.0863669	0.766	0.633	364.529
Sap30l	0.000224112	0.0863252	0.238	0.107	3.4901
Nlgn2	0.0346304	0.0863054	0.872	0.776	474.436
Slc8a3	0.0053304	0.0862158	0.217	0.117	79.4176
Adpgk	0.00539849	0.0862096	0.272	0.16	80.3835
Sap18	0.0232369	0.0861812	0.523	0.413	326.362
Synj1	0.0298847	0.0861184	0.966	0.918	412.946
Susd2	0.00139968	0.0860617	0.285	0.149	21.4137
Zfp365	0.0535906	0.0860408	0.579	0.459	708.468
Herc1	0.0541279	0.0860202	0.723	0.616	714.868
Gstm5	0.0692673	0.086004	0.426	0.338	883.642
Bcl2l1	0.0211343	0.0859904	0.528	0.374	298.163
Dnm3	0.0253494	0.0859903	0.881	0.769	354.359
Camk1g	0.00120572	0.0857901	0.298	0.16	18.4849
Setd7	0.0270096	0.0857577	0.404	0.285	376.406
B3galt6	0.00170627	0.0857074	0.281	0.157	26.0411
Rgs7bp	0.0154556	0.0856372	0.311	0.206	221.479
Camk2a	0.0336923	0.0856029	0.745	0.623	462.258
Acsl4	0.0155923	0.0855204	0.455	0.317	223.313
Mthfd1l	1.6852e-05	0.0854711	0.115	0.021	0.26557
Slc38a10	0.00773458	0.0854628	0.268	0.164	114.008
Lpgat1	0.0331184	0.0854514	0.74	0.594	454.749
Rnpepl1	0.00233394	0.0853474	0.302	0.171	35.4362
H2afy2	0.00627373	0.0853384	0.221	0.125	93.0582
Wwp1	0.0107047	0.085304	0.277	0.171	156.064
Abcd3	0.00804462	0.0851883	0.498	0.342	118.441
Fam169a	0.0130559	0.0850333	0.57	0.409	188.867
Sntg1	0.00057924	0.0850245	0.277	0.139	8.95041
Ube2f	0.0118029	0.0849949	0.362	0.242	171.532
Znrf2	0.00496944	0.0849685	0.268	0.157	74.1738
Gdpd2	0.000496056	0.0849131	0.209	0.093	7.67646
Cc2d1a	0.00540321	0.084737	0.272	0.164	80.4484
Ap2s1	0.0171267	0.0847309	0.528	0.409	244.073
Mib1	0.0207165	0.0847235	0.494	0.359	292.516
Dctn1	0.0449592	0.0845996	0.779	0.68	604.071
Zrsr1	0.0086768	0.0845039	0.557	0.395	127.393
Dhx40	0.00317211	0.0844633	0.213	0.11	47.9084
Cct4	0.0428849	0.0843779	0.638	0.512	578.518
Fscn1	0.00532955	0.0843431	0.345	0.21	79.4103
Echs1	0.0310074	0.0843187	0.234	0.153	427.499
March2	0.0201587	0.0843058	0.613	0.47	285.084
Fam98c	0.00616096	0.0842937	0.243	0.139	91.4349
Htt	0.0611845	0.0842756	0.574	0.452	794.971
Rnd1	0.0011433	0.0842246	0.277	0.146	17.545
Vkorc1l1	0.00494063	0.0842196	0.519	0.338	73.7686
Ina	0.0373176	0.0842165	0.919	0.822	508.788
Gabrb3	0.0263427	0.0842048	0.847	0.712	367.613
Grip2	0.00450238	0.0841745	0.174	0.085	67.4097
Mtif2	0.0109602	0.0839139	0.306	0.196	159.657
Gad2	0.0480832	0.0839037	0.987	0.972	642.535
Chp1	0.00635577	0.0838421	0.847	0.641	94.2497
Gpr137	0.0154332	0.0837758	0.311	0.203	221.189
Pigb	0.00247427	0.0837683	0.119	0.046	37.5199
Rsl24d1	0.0167158	0.0837564	0.506	0.37	238.602
Rps2	0.0226327	0.0837462	1	1	318.215
Gria4	0.0869211	0.0837138	0.387	0.306	1081.91
Smim18	0.0181118	0.0836894	0.174	0.1	257.514
Men1	0.0181581	0.0836829	0.217	0.135	258.135
Coprs	0.0213723	0.0836313	0.651	0.48	301.349
Fem1b	0.0535652	0.0836179	0.749	0.658	708.185
Ywhaq	0.0156739	0.0836	0.962	0.897	224.404
Shc2	0.00704262	0.0835968	0.251	0.146	104.111
Camk2n1	0.0664475	0.0835876	0.894	0.762	853.983
Extl3	0.0022273	0.083566	0.323	0.189	33.8461
Pip5k1c	0.0145274	0.0834184	0.596	0.431	208.889
2410002F23Rik	0.0855706	0.0833295	0.477	0.395	1067.15
Yars	0.0188964	0.0832837	0.421	0.299	268.064
Ext1	0.00947158	0.0832454	0.157	0.082	138.721
Borcs7	0.0449083	0.0831008	0.613	0.488	603.522
Zmym1	0.0615733	0.0830365	0.638	0.491	799.406
Ubap1	0.00502869	0.0830362	0.234	0.132	75.0432
Trim46	0.0274538	0.0830309	0.34	0.242	382.322
Rab2b	0.0107022	0.083017	0.362	0.238	156.038
Micall1	0.000781619	0.0829825	0.26	0.128	12.0385
Ggt7	0.014198	0.0829199	0.302	0.199	204.338
Manbal	0.0531342	0.0829067	0.383	0.281	703.231
Dgkd	0.00494687	0.0827999	0.366	0.224	73.8568
Kpna6	0.0171343	0.0827689	0.464	0.324	244.163
Ankib1	0.0131751	0.0827124	0.404	0.288	190.472
Rtn2	0.0134191	0.0826848	0.434	0.292	193.813
Sp3os	0.00512431	0.082679	0.191	0.1	76.4394
Scap	0.012969	0.0826555	0.255	0.157	187.726
Hipk3	0.0250406	0.0825734	0.498	0.356	350.343
Wdr77	0.0278835	0.0824789	0.387	0.278	387.72
2810001G20Rik	0.00771265	0.0824292	0.332	0.214	113.692
Mta1	0.0232085	0.0824113	0.391	0.278	326.033
Nol6	0.0299828	0.082394	0.383	0.285	414.182
C2cd4c	0.00475083	0.0823413	0.294	0.171	71.0155
Pdxk	0.0689484	0.0822848	0.783	0.665	880.54
Hdac7	0.00324429	0.0822663	0.515	0.331	48.9823
Ptchd4	0.0239708	0.082118	0.294	0.192	336.311
Golt1b	0.0434481	0.0821061	0.409	0.299	585.593
Tmem242	0.0116094	0.0819632	0.604	0.413	168.812
B230217O12Rik	0.00820732	0.0819133	0.221	0.128	120.738
Ak1	0.0150232	0.0818941	0.553	0.406	215.613
Nbea	0.0475361	0.0818775	0.804	0.705	635.891
Disp2	0.0801907	0.0818198	0.957	0.904	1008.32
Gm4631	0.005264	0.0817619	0.149	0.071	78.4651
Sfxn5	0.0453883	0.0817013	0.226	0.153	609.157
Ciz1	0.0061774	0.0816587	0.191	0.103	91.6603
Fam45a	0.0245543	0.0813388	0.319	0.217	343.834
Snx25	0.0277839	0.0813323	0.247	0.164	386.474
Gabra2	0.144533	0.0812121	0.757	0.68	1632.06
Cnot7	0.0373333	0.081184	0.664	0.502	508.927
Akap12	0.0604713	0.0811394	0.187	0.128	786.792
Camk2g	0.0390304	0.0811131	0.838	0.698	530.774
Mfsd4b4	8.16513e-05	0.0810733	0.111	0.025	1.27931
Inpp5e	0.0261875	0.0810719	0.217	0.139	365.577
Dgkq	0.0252039	0.0810356	0.4	0.278	352.502
Gng13	0.044277	0.0810279	0.409	0.313	595.835
Dscam	0.164131	0.0810095	0.621	0.512	1798.71
Slc45a4	0.0043332	0.0809639	0.26	0.146	64.9374
Ehd3	0.0131953	0.0808563	0.545	0.409	190.739
Patz1	0.00423296	0.0808061	0.285	0.164	63.4817
6030419C18Rik	0.00330316	0.0807998	0.404	0.242	49.8546
Sppl3	0.035538	0.0807841	0.574	0.434	486.053
Cadm3	0.0959784	0.080743	0.774	0.63	1178.52
Neurl4	0.00200203	0.0807191	0.23	0.117	30.4749
Rab11fip5	0.0182459	0.08067	0.434	0.299	259.256
Nr2c2ap	0.0282026	0.0805963	0.315	0.217	391.791
Slc5a5	0.053654	0.0805859	0.43	0.335	709.199
Cxcl14	0.146716	0.0805458	0.072	0.043	1652.91
Itsn1	0.043628	0.0804671	0.481	0.359	587.844
Tipin	0.015225	0.0804482	0.234	0.142	218.341
Vat1	0.0218705	0.0804318	0.953	0.854	307.98
Tbcb	0.0155726	0.0803851	0.511	0.377	223.046
Tor1a	0.0062284	0.0803749	0.285	0.167	92.3983
Spindoc	0.00585995	0.0803648	0.23	0.128	87.0671
Marf1	0.0846095	0.0803205	0.719	0.577	1056.94
Tspan5	0.00790944	0.0802434	0.311	0.196	116.514
Rassf8	0.053193	0.0802286	0.46	0.345	703.903
Bcam	0.00416492	0.0802211	0.115	0.046	62.4863
Atp13a2	0.0101198	0.0802143	0.498	0.331	147.831
Kdelr2	0.161186	0.0801305	0.391	0.32	1773.85
Thbs3	0.00255961	0.0800946	0.174	0.082	38.7884
Stim2	0.00901936	0.0800657	0.387	0.249	132.26
Ddb1	0.0284584	0.0800456	0.562	0.42	394.262
Nbeal2	0.00152706	0.0799693	0.123	0.046	23.3427
Dlgap2	0.000992977	0.079945	0.187	0.085	15.2551
Mad2l1	0.00159949	0.0798536	0.111	0.039	24.4354
Pmpca	0.00666462	0.0796521	0.353	0.214	98.7097
Ift88	0.0107234	0.0796411	0.187	0.103	156.315
Dnajc10	0.00244625	0.0795924	0.621	0.423	37.1048
Miga1	0.00745139	0.0795916	0.634	0.452	109.93
Csf1	0.00189402	0.079565	0.157	0.068	28.8516
Dad1	0.0416866	0.0795623	0.57	0.427	563.394
Tpst1	0.00396482	0.07954	0.264	0.146	59.5556
Mif	0.0209302	0.0795312	0.809	0.68	295.388
Lancl3	0.0182399	0.0794949	0.174	0.103	259.207
Sec23a	0.00682358	0.0794844	0.63	0.438	100.962
Mfsd11	0.037809	0.0794764	0.345	0.242	514.845
Plcl1	0.00710222	0.0794479	0.226	0.128	104.978
Pi4k2a	0.0833019	0.079432	0.426	0.324	1043.19
Bmpr2	0.0363666	0.079341	0.677	0.541	496.622
Abca1	0.00098194	0.0793166	0.064	0.011	15.0905
Lgi3	0.00759414	0.0793161	0.302	0.181	111.976
Tbc1d9b	0.0142204	0.0792022	0.332	0.224	204.646
Xylt1	3.27652e-05	0.0791635	0.111	0.021	0.515266
Aldh5a1	0.0170081	0.0791602	0.506	0.352	242.451
Rpl36	0.00598618	0.0791585	1	1	88.9007
Tgoln1	0.0176377	0.0791439	0.923	0.847	251.02
Gabarapl1	0.0280294	0.0791188	0.991	0.993	389.553
Ranbp6	0.0175127	0.0790939	0.37	0.246	249.364
Kit	0.00224401	0.079065	0.085	0.025	34.0955
2610002M06Rik	0.0545405	0.0789636	0.404	0.302	719.879
Pfn2	0.0284067	0.0789623	0.949	0.886	394.455
Slc7a3	0.0372822	0.0788668	0.191	0.121	508.38
Mrs2	0.00587889	0.0787534	0.302	0.178	87.3427
Minpp1	0.00960085	0.0787164	0.549	0.374	140.537
Pole4	0.010834	0.0787004	0.255	0.153	157.852
Prrt1	0.0185167	0.0786962	0.591	0.434	262.918
Fam210b	0.000367662	0.0786944	0.132	0.043	5.70464
Ipmk	0.00737503	0.0786093	0.319	0.196	108.833
Mapk9	0.0581759	0.0785997	0.728	0.648	759.196
Hacd3	0.0465489	0.0785873	0.685	0.552	623.522
Zfyve9	0.028872	0.0785772	0.315	0.221	399.646
Asb13	0.0014684	0.0785417	0.277	0.146	22.4534
Trp53i13	0.000824144	0.0785159	0.106	0.032	12.6877
Phyhip	0.117864	0.0785023	0.626	0.52	1401.52
Dnajc21	0.03573	0.0784644	0.536	0.409	488.5
Krt90	0.000328155	0.0784464	0.094	0.021	5.09757
Igf1r	0.0292346	0.0783639	0.396	0.281	404.431
Cacng3	0.0323033	0.0783572	0.187	0.117	444.462
Zfp942	0.00146668	0.0783486	0.264	0.135	22.4285
Tram1l1	0.104369	0.0783463	0.519	0.416	1267.15
Rfx5	0.00864638	0.078341	0.264	0.157	127.007
Park7	0.11702	0.0783361	0.655	0.552	1392.78
Nsdhl	0.00846633	0.0783124	0.17	0.089	124.438
Epha10	0.0148159	0.0782903	0.247	0.153	212.8
Mrpl12	0.0141706	0.0782818	0.519	0.367	204.212
1700001L19Rik	0.00735129	0.0782762	0.345	0.214	108.498
BC037034	0.00730468	0.0782576	0.289	0.178	107.854
B4galt2	0.00956512	0.0782484	0.315	0.199	140.043
Gm32585	0.00298479	0.0782392	0.089	0.028	45.142
Tubg2	0.0115604	0.0781102	0.391	0.253	168.111
Rnf187	0.139499	0.0780949	0.894	0.833	1585.83
Pink1	0.0422064	0.0780087	0.502	0.388	569.829
Bace1	0.019388	0.0779379	0.434	0.317	274.767
Cbx3	0.146638	0.0779357	0.877	0.804	1652.31
Gpc1	0.0100226	0.0778716	0.306	0.189	146.48
Rsl1d1	0.035057	0.0778035	0.4	0.288	479.896
Nop56	0.0942464	0.0777107	0.732	0.598	1161.87
Spcs1	0.0857579	0.0776772	0.621	0.488	1069.06
B830012L14Rik	0.00236071	0.0775777	0.43	0.26	35.8379
Slc39a7	0.00655659	0.0775077	0.357	0.228	97.1359
Dtnbp1	0.028272	0.0775074	0.511	0.367	392.699
Snhg12	0.330572	0.0774785	0.8	0.694	2652.51
Zfp523	0.0236382	0.0774039	0.353	0.242	331.762
1810043G02Rik	0.0346306	0.0773541	0.413	0.299	474.405
Dcaf5	0.0691481	0.0773397	0.46	0.352	882.537
Babam2	0.0063367	0.0773105	0.226	0.125	93.9796
Slc29a4	0.0131551	0.0773034	0.255	0.157	190.196
Tspyl3	0.0705081	0.0772605	0.434	0.338	897.639
Larp1	0.0985485	0.0771432	0.685	0.552	1204.95
Gpr101	0.4038	0.077118	0.387	0.342	2621.87
Ocrl	0.116831	0.0771008	0.702	0.562	1391.1
Rbck1	0.00641794	0.077092	0.485	0.327	95.1396
Cnpy3	0.0452258	0.077065	0.404	0.292	607.156
Zfp746	0.00371842	0.0770561	0.247	0.135	55.9436
Arxes2	0.124483	0.0770511	0.77	0.655	1438.78
Prpsap1	0.0323367	0.0769383	0.37	0.267	444.888
Phf1	0.061936	0.0769368	0.413	0.306	803.557
Gnl1	0.0542506	0.0768823	0.532	0.402	716.379
Kcnip1	0.0317968	0.076875	0.443	0.317	437.81
Nelfb	0.00193731	0.0767933	0.353	0.206	29.5013
Rxrb	0.0226411	0.0767593	0.251	0.16	318.312
Creb3	0.00216823	0.076746	0.191	0.093	32.9615
Daam1	0.0423767	0.0766946	0.54	0.409	571.917
Garem1	0.00698153	0.0766835	0.136	0.064	103.236
Mmd	0.100986	0.0766136	0.672	0.577	1231.62
Dscr3	0.00926886	0.0765722	0.319	0.192	135.844
Acvr2a	0.0299459	0.0765437	0.264	0.178	413.732
2010315B03Rik	0.00161191	0.076463	0.217	0.107	24.6187
Faap100	0.00734313	0.0764406	0.209	0.114	108.385
Unc80	0.0768967	0.0763204	0.915	0.801	971.129
Gm48682	0.000370457	0.0762762	0.094	0.021	5.74765
Med12l	0.00932732	0.0762443	0.264	0.16	136.655
Ankmy2	0.0347005	0.0762326	0.379	0.263	475.223
Gramd1a	0.143708	0.0762224	0.489	0.406	1624.05
4930452B06Rik	0.00798097	0.0761567	0.149	0.075	117.536
Cstf2	0.0669326	0.0761513	0.549	0.409	856.67
Slc7a4	0.00779678	0.0761509	0.247	0.146	114.893
Map3k15	0.000867392	0.0760365	0.072	0.014	13.3466
Clns1a	0.00683807	0.0760011	0.502	0.338	101.162
Rassf5	0.0198423	0.0759032	0.281	0.178	280.849
Camk1d	0.00365376	0.0758922	0.132	0.057	54.9855
Hdgf	0.0166768	0.0757901	0.885	0.73	238.094
Nipsnap3b	0.0247574	0.0757599	0.174	0.103	346.53
Trim3	0.0116424	0.0757452	0.34	0.221	169.269
Dcaf7	0.061058	0.0757332	0.881	0.786	793.51
Gm15417	0.00553277	0.0756835	0.106	0.043	82.3388
Psma4	0.108544	0.0756243	0.366	0.295	1313.27
Tm7sf3	0.0139858	0.0755652	0.2	0.117	201.619
Fam219b	0.00481699	0.0755621	0.255	0.146	71.9706
Ncald	0.245609	0.075522	0.689	0.605	2381.91
Zfp354c	0.0178031	0.0752862	0.345	0.221	253.285
Gkap1	0.0626397	0.0751062	0.557	0.441	811.247
Oprl1	0.185869	0.0750905	0.57	0.516	1982.85
Coa5	0.0499455	0.0750709	0.498	0.384	665.225
Dcaf6	0.0674551	0.0750268	0.234	0.16	862.751
Phc2	0.0208811	0.0750089	0.345	0.231	294.737
B4galnt1	0.00846468	0.0749382	0.302	0.189	124.422
Rap1gap2	0.0628279	0.0749333	0.46	0.349	813.182
Mettl9	0.0286084	0.0748334	0.647	0.512	396.255
Lrrc8b	0.0105059	0.074765	0.226	0.128	153.281
Arhgef4	0.0406749	0.0746355	0.774	0.626	550.982
Slc6a7	0.0265342	0.0745501	0.4	0.281	370.045
Rasl10b	0.060652	0.0745472	0.349	0.263	788.718
Kcnc3	0.00539735	0.0745217	0.226	0.125	80.372
Snrpd3	0.0195938	0.0745191	0.374	0.263	277.448
Armc1	0.106102	0.0744787	0.566	0.463	1286.38
Tmem115	0.0219657	0.0744413	0.179	0.103	309.254
Mgat5	0.0407521	0.0744338	0.502	0.367	551.987
Mrps9	0.0128709	0.0743698	0.272	0.171	186.371
Gabra3	0.249893	0.0743362	0.715	0.605	2400.97
Syt2	5.15783e-05	0.0742088	0.077	0.007	0.810037
Dzank1	0.0649839	0.0741995	0.928	0.829	837.187
Tmem202	0.0045504	0.0741561	0.102	0.039	68.1012
Ifitm10	0.00483629	0.0741164	0.255	0.146	72.2445
Tmem106c	0.0188053	0.0740865	0.374	0.256	266.828
Ece2	0.0564392	0.0739321	0.447	0.331	742.232
Kansl2	0.0291561	0.0738931	0.4	0.278	403.433
Atcay	0.0515475	0.0737617	0.745	0.566	684.087
Eid1	0.0221993	0.0737153	0.979	0.907	312.41
Ahcyl2	0.15606	0.0737037	0.515	0.416	1730.86
Unc13c	0.0507714	0.0735034	0.14	0.085	674.905
Cdc34	0.00530968	0.0734618	0.306	0.185	79.1248
Cryz	0.000619166	0.0734307	0.089	0.021	9.55992
Nme5	0.0133891	0.0733711	0.153	0.082	193.432
Cnot1	0.00864862	0.0733654	0.468	0.32	127.014
Trim2	0.0218631	0.0733535	0.906	0.861	307.92
Nars	0.18507	0.0733506	0.719	0.637	1975.25
Hid1	0.0229274	0.073199	0.404	0.285	322.199
Dexi	0.0559088	0.0731368	0.387	0.288	735.927
Iqsec2	0.0181485	0.0731011	0.281	0.178	258.017
Dnajc30	0.0400573	0.073066	0.353	0.249	543.697
Lipo3	0.014325	0.0730217	0.128	0.064	206.08
Peli2	0.00060623	0.072981	0.051	0.004	9.36322
Cdr2l	0.00155475	0.0729551	0.2	0.096	23.7612
Apmap	0.00719989	0.072923	0.311	0.185	106.364
Tmx2	0.161179	0.0728558	0.821	0.719	1773.94
2900011O08Rik	0.130704	0.0728002	0.804	0.719	1499.57
Fam53c	0.0311338	0.0726718	0.311	0.214	429.179
Tanc1	0.00514784	0.0726571	0.085	0.028	76.7852
Hmga1	0.00139362	0.0726533	0.132	0.05	21.3224
Pfn1	0.0148294	0.0726353	0.374	0.253	212.966
Tnks1bp1	0.00597858	0.072602	0.111	0.046	88.7939
Vps11	0.00747559	0.0725956	0.289	0.171	110.272
Ppt2	0.00999376	0.0725762	0.187	0.103	146.069
Cyc1	0.0619018	0.0725317	0.528	0.402	803.176
Ehmt2	0.0511997	0.0724617	0.477	0.359	680.137
Rlim	0.0624565	0.0724552	0.532	0.409	809.249
Fdps	0.172416	0.0724523	0.243	0.192	1866.75
Gcn1l1	0.0542943	0.0724424	0.396	0.285	716.847
Ranbp3	0.0394409	0.0723221	0.349	0.249	535.884
Fkbp1a	0.174805	0.0722537	0.949	0.932	1887.89
Foxj3	0.12233	0.0722228	0.587	0.491	1421.72
Arfip1	0.0106095	0.0722172	0.183	0.1	154.73
Tnr	0.0149165	0.0721986	0.298	0.185	214.172
Skiv2l	0.0205644	0.0721751	0.174	0.103	290.554
Nkrf	0.00155581	0.0721365	0.247	0.128	23.7744
2410131K14Rik	0.0118733	0.0720912	0.17	0.093	172.507
4931428F04Rik	0.0145206	0.072073	0.268	0.164	208.807
Plcb1	0.104495	0.0720232	0.464	0.384	1268.57
B3gat3	0.038975	0.071939	0.668	0.509	530.06
Phf21b	0.000129385	0.0719259	0.051	0	2.02228
Sdhc	0.0540752	0.0719232	0.562	0.438	714.333
Zfand5	0.124799	0.0719075	0.685	0.584	1441.55
4931406C07Rik	0.0202721	0.071905	0.187	0.11	286.567
Slc31a1	0.00338429	0.0719044	0.149	0.068	51.0385
Cdk5	0.0476057	0.0718977	0.511	0.381	636.678
Sh3gl3	0.064801	0.071894	0.536	0.427	835.156
Ptdss1	0.0292413	0.0718636	0.464	0.342	404.495
Cntrl	0.000575725	0.0718587	0.102	0.028	8.89668
Zfp771	0.0136034	0.071849	0.323	0.206	196.311
Lancl2	0.0342176	0.0718301	0.443	0.32	469.055
Rc3h1	0.0714454	0.0718086	0.46	0.342	908.142
Enho	0.0194315	0.0718066	0.455	0.327	275.325
2410015M20Rik	0.0545774	0.0717913	0.796	0.669	720.259
Nup155	0.00536454	0.0717768	0.179	0.089	79.9102
Hcn1	0.0525438	0.0717576	0.557	0.42	695.995
Mtmr12	0.00388294	0.0716316	0.111	0.043	58.3606
Ogdhl	0.0189967	0.0716103	0.272	0.178	269.392
Tma7	0.0175045	0.071599	0.987	0.968	249.265
Gsk3b	0.0806019	0.0715474	0.983	0.961	1012.76
Arl1	0.0670028	0.0714563	0.587	0.456	857.502
C4b	1.76881e-05	0.0714413	0.064	0	0.278729
Mgrn1	0.147355	0.0714123	0.583	0.456	1657.89
Stoml2	0.0195237	0.0714097	0.396	0.27	276.573
Larp1b	0.000503041	0.071407	0.123	0.039	7.78304
Fam98a	0.0146594	0.0713729	0.2	0.117	210.685
Mrpl30	0.0709008	0.0713017	0.749	0.63	902
Atg4c	0.0120931	0.0712591	0.226	0.132	175.604
Azin1	0.0185514	0.0712105	0.485	0.345	263.374
Gas7	0.158507	0.0711951	0.736	0.669	1750.24
Thoc5	0.00180599	0.071143	0.136	0.053	27.5413
Ubr3	0.0477726	0.0711398	0.668	0.527	638.815
Ndufa12	0.0914515	0.0710567	0.817	0.712	1132.63
Mak16	0.0415943	0.0710357	0.243	0.164	562.272
Atf6	0.0155508	0.07096	0.157	0.085	222.75
Tsc22d1	0.0860156	0.0709502	0.953	0.843	1072.18
Sdha	0.0572924	0.0708367	0.826	0.754	752.65
Nmnat2	0.0639375	0.0707923	0.774	0.665	825.178
Rita1	0.000756497	0.0707358	0.183	0.078	11.6554
Pcyt1a	0.010792	0.0707176	0.183	0.1	157.261
Atp2b1	0.0968833	0.0706995	0.843	0.776	1187.79
Cog7	0.0555723	0.0706704	0.306	0.217	732.164
Gem	0.00113257	0.0706683	0.055	0.007	17.3816
Ccdc92b	0.038564	0.0706677	0.183	0.117	524.702
Acsl5	0.0117062	0.0705488	0.183	0.103	170.174
Srp9	0.166426	0.0705472	0.753	0.69	1819.7
Lrp1b	0.285958	0.0704718	0.94	0.843	2452.94
Mib2	0.0118392	0.0704654	0.251	0.153	172.048
Manea	0.00521559	0.0704545	0.336	0.203	77.7697
Mtch1	0.0776722	0.0704509	0.949	0.918	980.068
Prr12	0.0632335	0.0704289	0.374	0.27	817.293
Naa60	0.0486437	0.07041	0.404	0.281	649.393
N4bp2l1	0.00391904	0.070394	0.426	0.26	58.8758
Zfp385a	0.0455618	0.0703007	0.179	0.114	611.348
Tm2d2	0.0177098	0.0701736	0.379	0.256	252.011
Zscan18	0.0334987	0.0701255	0.311	0.214	459.702
Grina	0.0564448	0.0700966	0.851	0.73	742.249
Rnf114	0.0540998	0.0700875	0.379	0.274	714.55
Insm2	0.0789616	0.0700852	0.098	0.057	994.916
Mtmr6	0.119826	0.070078	0.613	0.495	1421.01
Psmd2	0.0605526	0.0700473	0.451	0.345	787.608
Atpaf2	0.318522	0.0699762	0.183	0.146	2594.36
Samd5	0.021855	0.0699682	0.417	0.292	307.828
Aarsd1	0.00416827	0.0699245	0.145	0.064	62.5324
2010107E04Rik	0.220893	0.069897	0.847	0.776	2227.49
Zdhhc18	0.0243378	0.0698963	0.191	0.117	341.168
Cs	0.0940058	0.0698184	0.557	0.448	1159.47
Ggct	0.0278743	0.0697884	0.281	0.185	387.62
Hexim2	0.00170426	0.0697756	0.251	0.128	26.0121
Adam19	0.00288536	0.069772	0.119	0.046	43.6468
Prpf18	0.0803478	0.06977	0.426	0.327	1010.05
Ndufb5	0.0277798	0.06976	0.919	0.854	386.444
Atp6v0a1	0.442452	0.0697445	0.736	0.676	2656.92
Kcnq5	0.00701326	0.0697336	0.174	0.089	103.684
Trak2	0.00546648	0.0697152	0.26	0.149	81.374
Endod1	0.106515	0.0697045	0.566	0.441	1290.96
Mid1	0.0031167	0.0696533	0.217	0.11	47.0964
Grin1	0.154054	0.0696367	0.8	0.694	1714.46
Atp6v1g2	0.217281	0.069601	0.838	0.772	2200.41
Csnk2b	0.0297978	0.0695569	0.443	0.313	411.835
Klhdc8b	0.00911196	0.0694811	0.413	0.278	133.6
Neo1	0.147706	0.0694116	0.4	0.32	1661.39
Kdelc2	0.00435297	0.0693897	0.081	0.025	65.2293
Gdap10	0.00107872	0.0693475	0.098	0.028	16.5584
Mzt2	0.00800374	0.0693185	0.119	0.053	117.863
Dact3	0.0342691	0.0692461	0.464	0.335	469.726
Bend5	0.0847288	0.0692436	0.162	0.11	1058.09
Morn1	0.000537201	0.0691179	0.089	0.021	8.3062
Prkcsh	0.0231302	0.0690723	0.417	0.292	324.98
Ctnnd2	0.032827	0.0690392	0.6	0.448	450.977
Tacr1	0.0301788	0.0690007	0.136	0.078	416.739
Cct2	0.0410276	0.0689674	0.783	0.623	555.431
Lgr4	0.0243231	0.0689142	0.157	0.089	340.985
Sub1	0.106983	0.0689092	0.97	0.911	1296.1
Tmem248	0.0501671	0.068888	0.447	0.32	667.824
Srrd	0.0126818	0.068845	0.234	0.135	183.797
Chml	0.0218537	0.0688422	0.221	0.135	307.831
Ripor2	0.00394882	0.0688139	0.264	0.146	59.3192
Brap	0.0456091	0.068788	0.277	0.196	611.846
Ap3m1	0.0551567	0.0687389	0.268	0.189	727.296
Derl2	0.0534635	0.0687304	0.26	0.181	707.162
Cbx6	0.0557233	0.0687267	0.877	0.79	733.708
Tppp	0.106869	0.0687238	0.821	0.744	1294.94
Miga2	0.010746	0.0686085	0.374	0.242	156.622
Sall1	0.0791321	0.068588	0.123	0.075	996.59
Sowahc	0.039289	0.068562	0.145	0.085	534.134
Spata24	0.00287377	0.0685612	0.123	0.05	43.4744
Pdzd8	0.0340886	0.0685478	0.413	0.295	467.389
Snrnp25	0.0421089	0.0685428	0.268	0.181	568.597
Lamb1	0.00210985	0.0685131	0.085	0.025	32.0845
Plaa	0.0406443	0.0685003	0.268	0.181	550.609
Ppp1r2	0.049515	0.0684113	0.745	0.601	660.085
Acly	0.0180442	0.0683899	0.613	0.445	256.607
Syngr3	0.0635564	0.0683896	0.851	0.712	820.704
AU022252	0.0217629	0.068341	0.251	0.157	306.661
Apoo	0.0408561	0.0681464	0.187	0.117	553.314
Hspb11	0.021107	0.0681334	0.306	0.203	297.798
Kcnh1	0.109947	0.0680229	0.345	0.267	1327.72
Zc3h7a	0.00751017	0.0680165	0.294	0.181	110.768
Ptp4a3	0.0127462	0.0679758	0.204	0.117	184.68
Cacna2d3	0.00352392	0.067879	0.094	0.032	53.109
Zfp120	0.00866838	0.067853	0.281	0.171	127.286
Socs1	0.00105274	0.0678305	0.085	0.021	16.1638
Slc8a2	0.0402216	0.0677578	0.413	0.302	545.807
Rpl15	0.015542	0.0677324	1	1	222.64
Slc12a7	0.00202284	0.0676528	0.06	0.011	30.7876
Ltv1	0.0124694	0.0676498	0.098	0.043	180.856
Mcee	0.0171793	0.0675698	0.319	0.206	244.771
Prrc1	0.0201966	0.0675547	0.217	0.128	285.58
Mysm1	0.0064603	0.0675139	0.421	0.27	95.7546
Sept9	0.130334	0.067501	0.217	0.16	1496.23
Spns2	0.0122028	0.0674889	0.268	0.16	177.147
Usp51	0.0023939	0.0674504	0.306	0.164	36.325
Usmg5	0.112331	0.0674353	0.962	0.886	1352.69
Atxn7l3	0.0460075	0.0673574	0.506	0.388	616.638
Mamld1	0.0389704	0.0673068	0.209	0.135	530.036
Tsr1	0.0122437	0.0673018	0.191	0.107	177.718
Lrig2	0.0504162	0.0672591	0.379	0.274	670.636
Hcfc1r1	0.0943308	0.0672178	0.621	0.498	1162.63
Ap2b1	0.188889	0.0670859	0.804	0.694	2007.52
Btbd11	0.0635252	0.067061	0.421	0.317	820.492
Appl2	0.0245486	0.0669178	0.162	0.093	343.778
Mbd1	0.0225659	0.0668147	0.315	0.206	317.299
Pusl1	0.00354219	0.0667679	0.209	0.107	53.3772
Cdk16	0.0206988	0.0666749	0.421	0.288	292.288
Smim1	0.0831488	0.0666681	0.272	0.199	1041.44
Trmt2b	0.0027687	0.0666394	0.102	0.036	41.8987
Srprb	0.0582422	0.0665684	0.37	0.281	759.944
Fam171a2	0.102759	0.066528	0.468	0.359	1250.47
Eid2	0.0803005	0.0665096	0.294	0.214	1009.62
Pcmt1	0.124749	0.0665088	0.8	0.68	1441.1
Glo1	0.0619486	0.0665029	0.498	0.381	803.659
Gm32014	0.00148543	0.0664918	0.115	0.039	22.7108
BC003331	0.0259687	0.066351	0.413	0.295	362.652
Gnl3l	0.1079	0.0663475	0.966	0.925	1306.23
Slc25a5	0.0749001	0.0663125	0.37	0.27	948.535
Wtap	0.270406	0.0662887	0.545	0.456	2534.25
St3gal5	0.0482605	0.0662661	0.238	0.164	644.711
Mex3b	0.0278147	0.0662208	0.111	0.057	386.847
Map3k12	0.0499193	0.0661912	0.54	0.395	664.975
Slc38a1	0.0924857	0.0661447	0.838	0.744	1143.86
Cdc42bpb	0.00836731	0.0661248	0.468	0.313	123.025
Map2k7	0.0392982	0.0660605	0.549	0.399	534.22
Cds1	0.00653701	0.0660492	0.17	0.085	96.8655
Ppp1r16a	0.0717003	0.0660372	0.302	0.221	911.024
Sphk2	0.0166531	0.0660246	0.166	0.093	237.773
Trip4	0.0712582	0.0660191	0.426	0.317	906.191
Abcb9	0.00655462	0.0659557	0.213	0.117	97.1132
Nme1	0.181246	0.0659175	0.851	0.751	1942.95
Cep83	0.0463474	0.0658552	0.213	0.139	621.009
Dab2ip	0.0175333	0.0658086	0.417	0.288	249.639
Timm8a1	0.0331098	0.0657408	0.123	0.068	454.73
Dennd5a	0.0417513	0.0657124	0.604	0.473	564.185
Vars2	0.0114884	0.0657069	0.166	0.089	167.11
Kcnq1ot1	0.306136	0.065701	0.979	0.922	2546.74
Xpnpep1	0.00996005	0.0656995	0.166	0.085	145.596
Chrna4	0.0278364	0.0656804	0.085	0.039	387.121
Cradd	0.00205706	0.0656128	0.081	0.021	31.2982
Sbf1	0.0216221	0.0655785	0.306	0.196	304.764
Tmcc2	0.0175737	0.0655082	0.413	0.285	250.179
Slc16a1	0.0213351	0.0654816	0.123	0.064	300.868
Gm8186	0.0294492	0.0654801	0.221	0.142	407.223
Mrpl13	0.0538454	0.0654297	0.289	0.206	711.459
Qtrt1	0.0287989	0.0654263	0.238	0.153	398.749
Tlnrd1	0.0147242	0.0654003	0.277	0.174	211.571
Tmem110	0.0003759	0.0653687	0.187	0.075	5.83134
Bag5	0.0159956	0.0653454	0.281	0.174	228.849
Phkg2	0.0211474	0.0653315	0.545	0.391	298.326
Rnf149	0.0080907	0.0652943	0.481	0.317	119.095
Maged2	0.0217928	0.0652723	0.349	0.242	307.039
Egln2	0.0733749	0.0652424	0.579	0.434	930.54
Pigyl	0.037536	0.0652409	0.528	0.381	511.353
Sall2	0.0379611	0.065219	0.472	0.363	516.802
Ppp1r15b	0.0240544	0.0651829	0.268	0.171	337.387
Atp5f1	0.0451818	0.0651429	0.774	0.63	606.611
Map3k7	0.0187463	0.0651107	0.251	0.157	266.048
Cox6b1	0.0625041	0.065088	0.928	0.851	809.741
Chtf8	0.0156066	0.0650866	0.179	0.1	223.503
Meg3	0.012178	0.0650605	1	1	176.812
Tle3	0.00826644	0.0649824	0.14	0.068	121.575
Gtf2i	0.0473205	0.064936	0.715	0.587	633.148
Rundc1	0.00692933	0.0649315	0.243	0.139	102.478
4933431E20Rik	0.0109845	0.0648853	0.37	0.246	160
Ache	0.0244155	0.0648488	0.506	0.359	342.135
Gpatch2	0.00271618	0.0648197	0.302	0.167	41.1202
Arih2	0.00913087	0.0648003	0.328	0.206	133.868
Mrps34	0.0247761	0.0647781	0.434	0.302	346.766
Vapa	0.0529229	0.0647452	0.702	0.552	700.753
Anxa6	0.0361193	0.0647365	0.268	0.174	493.498
Rapgef4	0.0433884	0.0647058	0.323	0.224	584.918
Ttll5	0.0106196	0.0647015	0.26	0.157	154.865
Itfg1	0.227361	0.0646708	0.804	0.722	2274.75
Ipo4	0.037294	0.0646124	0.353	0.249	508.504
Frmd6	0.00237771	0.0646052	0.072	0.018	36.0889
Cisd3	0.00569376	0.0645929	0.387	0.242	84.6663
Chac2	0.0256238	0.0645645	0.162	0.093	358.041
Mkl1	0.0396635	0.0644335	0.196	0.125	538.709
Mccc2	0.00675507	0.0643837	0.166	0.082	99.9818
Rara	0.000541446	0.0643344	0.077	0.014	8.3713
Rps9	0.0541498	0.0643201	1	0.996	715.102
Dock3	0.0423441	0.0642615	0.626	0.477	571.518
Rnf138	0.0317734	0.064239	0.306	0.199	437.52
Uba3	0.0121794	0.0641749	0.421	0.285	176.82
Krtcap2	0.0973764	0.0641561	0.643	0.512	1192.86
Tspan33	0.0825073	0.0641259	0.413	0.31	1034.31
Rasd1	0.0019085	0.0640935	0.06	0.011	29.0702
Ddx19b	0.00733586	0.0640799	0.094	0.036	108.292
Gm8281	0.00427067	0.0640393	0.094	0.032	64.0301
Inafm1	0.185843	0.064012	0.57	0.463	1982.76
Iars2	0.0131422	0.0640013	0.191	0.107	190.023
Cyb561	0.0506354	0.063969	0.519	0.377	673.349
Nudt11	0.0535483	0.0639496	0.617	0.466	708.016
Pid1	0.264461	0.0639143	0.481	0.402	2495.46
Chmp6	0.046739	0.0639105	0.234	0.157	625.789
Hmgcr	0.0868566	0.0639103	0.562	0.448	1081.37
Larp4b	0.129226	0.0638923	0.826	0.68	1485.58
Stub1	0.0498825	0.063891	0.817	0.665	664.585
Cask	0.149713	0.0638869	0.591	0.495	1679.49
Fads1	0.0510467	0.0638494	0.349	0.253	678.41
Lsm14b	0.021914	0.0638482	0.374	0.256	308.549
A230087F16Rik	0.010043	0.0637874	0.204	0.114	146.749
Glud1	0.0485605	0.0637739	0.668	0.552	648.477
Ndufv1	0.0733376	0.063772	0.311	0.231	930.14
Ppp2r2b	0.0354286	0.0637708	0.677	0.509	484.769
Mpp3	0.00399203	0.0636808	0.234	0.125	59.9523
1700037H04Rik	0.140182	0.0636292	0.545	0.441	1592.19
BC031181	0.0694441	0.0635971	0.698	0.548	885.69
Dnajc14	0.0862329	0.0635405	0.26	0.189	1074.46
2310035C23Rik	0.0648289	0.0634763	0.613	0.466	835.45
Fam19a5	0.112767	0.0634654	0.702	0.562	1357.04
Tmx1	0.0434095	0.063334	0.736	0.626	585.16
Vps13c	0.0225425	0.0633334	0.391	0.26	317.016
Col16a1	0.00556235	0.0633208	0.119	0.05	82.7511
Prpf4	0.0207498	0.0632685	0.149	0.082	292.966
Itgb1bp1	0.0259834	0.0632553	0.149	0.085	362.832
Hnrnpa3	0.0901581	0.0632204	0.932	0.843	1118.59
Kifc3	0.0484319	0.0632153	0.234	0.157	646.905
Cand1	0.129812	0.0631432	0.668	0.577	1491.15
Gng3	0.0838395	0.0631062	0.987	0.954	1049
Chchd10	0.0720433	0.0630861	0.83	0.747	915.021
Scamp1	0.0445554	0.0630638	0.821	0.73	599.225
Tmem41b	0.0183235	0.0630533	0.443	0.313	260.304
Ndufa6	0.105698	0.0630361	0.97	0.911	1282.12
Sirpa	0.374436	0.0630302	0.647	0.598	2554.78
Gm15609	0.00242765	0.0629943	0.098	0.032	36.8298
Foxred1	0.0531112	0.0629719	0.196	0.128	703.033
Magee1	0.20429	0.0629536	0.728	0.598	2097.04
Mark1	0.124511	0.0629195	0.272	0.203	1438.85
Ino80e	0.0335269	0.0628533	0.315	0.214	460.056
Sdccag3	0.0622837	0.0628426	0.374	0.274	807.383
Gna11	0.12424	0.0628063	0.668	0.52	1436.59
0610010F05Rik	0.0181874	0.0627313	0.391	0.267	258.497
Zc3h7b	0.159325	0.0627134	0.574	0.48	1757.03
Snrpa1	0.122535	0.0627041	0.387	0.31	1421.04
Etfbkmt	0.0101306	0.0625869	0.106	0.046	147.978
Nfkbia	0.0147725	0.0625662	0.179	0.1	212.222
Trpt1	0.0168398	0.0625555	0.2	0.114	240.203
Klf6	0.0492847	0.0625439	0.26	0.174	657.211
Srebf1	0.00262881	0.0624652	0.098	0.032	39.8212
Fat3	0.0918864	0.062405	0.409	0.302	1137.55
Rnf123	0.0337154	0.0624026	0.132	0.075	462.507
Hnrnpu	0.104205	0.0623791	0.885	0.786	1265.68
Ctsl	0.0276924	0.0623703	0.306	0.206	385.423
Stk32c	0.00345882	0.0623429	0.443	0.281	52.1382
As3mt	0.0932205	0.0623272	0.277	0.203	1152.02
Carmil2	0.0395725	0.0623055	0.374	0.256	537.592
Hcfc1	0.187344	0.0622868	0.566	0.47	1995.4
Ftl1	0.0437635	0.0622782	0.996	0.975	589.538
Fgfr1op2	0.106431	0.0622317	0.638	0.491	1290.16
Tmem63b	0.040338	0.0621845	0.54	0.399	546.862
Cnbp	0.262986	0.0620919	0.787	0.683	2486.01
Opa1	0.146685	0.0620563	0.455	0.363	1652.7
Gtpbp3	0.00994073	0.0620534	0.106	0.046	145.323
Hmbs	0.0146696	0.0619978	0.23	0.135	210.816
Ubxn11	0.00842376	0.0619345	0.119	0.053	123.838
Kif5c	0.126369	0.0619045	0.83	0.776	1456.79
Peli3	0.0125173	0.0618833	0.098	0.043	181.501
Cnnm1	0.055196	0.0618688	0.643	0.466	727.759
Plekhg5	0.0265392	0.0618589	0.23	0.146	370.09
Farsb	0.013758	0.0618447	0.374	0.246	198.486
Mettl14	0.013533	0.0617864	0.145	0.075	195.349
Cdk5r2	0.133455	0.0617855	0.579	0.459	1526.32
Tcf12	0.0176126	0.0616615	0.251	0.153	250.698
Cptp	0.00510576	0.0616304	0.221	0.117	76.1678
Rab43	0.00400715	0.0616265	0.094	0.032	60.1714
Gale	0.0213851	0.0615411	0.153	0.085	301.508
Bcor	0.0162757	0.0614658	0.217	0.128	232.677
Ngrn	0.054752	0.0614241	0.451	0.327	722.344
Sgsm2	0.0888402	0.0613735	0.536	0.416	1104.02
Amz2	0.0687794	0.0613615	0.374	0.274	878.519
Ankrd13b	0.0829347	0.0613395	0.264	0.192	1039.09
Sept3	0.0646835	0.0613207	0.945	0.883	833.77
Gspt2	0.0124796	0.0613169	0.319	0.199	180.991
Repin1	0.0745246	0.0613099	0.247	0.171	944.078
Bcap29	0.15782	0.061276	0.468	0.377	1745.17
Galnt11	0.0840587	0.0612605	0.289	0.21	1051.32
Ankrd50	0.0311869	0.0612542	0.43	0.299	429.818
Xylt2	0.00753813	0.0612359	0.166	0.085	111.165
Kcnip2	0.0564605	0.0611847	0.196	0.128	742.399
Tmem185a	0.0270671	0.0611767	0.306	0.203	377.099
Ric8a	0.00697549	0.0611261	0.243	0.135	103.154
Slc25a14	0.0590217	0.0611144	0.298	0.206	769.585
Slitrk3	0.0473535	0.0610667	0.251	0.171	633.495
Tfb2m	0.00927717	0.0610468	0.2	0.107	135.957
Slc25a39	0.0700222	0.0610459	0.409	0.313	892.013
Crh	0.534712	0.0610425	0.026	0.018	2654.31
Cetn2	0.410719	0.0610183	0.366	0.327	2595.33
Trim32	0.0805612	0.0609495	0.694	0.541	1012.41
Pick1	0.0545464	0.0608842	0.306	0.217	719.903
Pdlim7	0.0771244	0.060864	0.4	0.299	973.773
Stx18	0.00975074	0.0608514	0.17	0.089	142.653
Nptx2	0.0294625	0.0608479	0.064	0.025	407.378
Cacna1g	0.0587811	0.0606499	0.302	0.217	766.682
Sort1	0.0974683	0.0606432	0.362	0.27	1193.69
Szt2	0.000735099	0.0606029	0.187	0.078	11.3301
Fndc10	0.0439419	0.0605757	0.247	0.167	591.677
Gprc5b	0.00493016	0.0605615	0.136	0.06	73.6172
Gnb1	0.0232269	0.0605168	0.983	0.915	326.245
Vti1a	0.0378802	0.060342	0.272	0.181	515.776
Dyrk2	0.0139607	0.0603348	0.272	0.164	201.286
Pbx4	0.00259942	0.0602805	0.391	0.235	39.3838
Zfp248	0.0162592	0.0602417	0.179	0.1	232.457
Pclo	0.0810632	0.0602367	0.868	0.801	1018.07
Setd6	0.0277459	0.0602208	0.213	0.132	386.029
Cda	0.0417852	0.0602178	0.157	0.096	564.519
Asrgl1	0.010698	0.0602061	0.238	0.139	155.988
Kcnq2	0.0571992	0.0601924	0.787	0.626	751.597
Zfp946	0.00526367	0.0601855	0.187	0.096	78.4655
Atxn7l1	0.0113593	0.0601793	0.362	0.235	165.29
Mxi1	0.0184913	0.060172	0.209	0.125	262.595
Large1	0.0375821	0.060161	0.498	0.367	511.905
Fam193b	0.205101	0.0601572	0.528	0.413	2102.49
Gga1	0.0375905	0.0601554	0.328	0.228	511.982
Ormdl3	0.0891038	0.0601492	0.413	0.327	1106.58
Lrrc1	0.00788184	0.0601439	0.094	0.036	116.123
Brsk2	0.0123062	0.0600042	0.396	0.26	178.588
Panx2	0.00390938	0.0599936	0.294	0.167	58.7424
Tmem106b	0.136858	0.0599895	0.689	0.566	1560.04
Aprt	0.0563491	0.0599767	0.404	0.281	741.273
H13	0.152252	0.0599676	0.549	0.452	1701.26
Endog	0.0135753	0.0599567	0.204	0.117	195.946
Tmem260	0.0153111	0.0599546	0.264	0.164	219.5
Plscr4	0.000618193	0.059927	0.068	0.011	9.54614
Fbxo10	0.194699	0.059884	0.536	0.441	2059.33
Ndufaf5	0.0119474	0.0598738	0.217	0.125	173.56
Rac1	0.567094	0.059863	0.898	0.826	2524.14
Rerg	0.00559712	0.0598238	0.149	0.071	83.2515
Kmt5a	0.0853959	0.059751	0.311	0.228	1065.23
Efemp1	0.00341149	0.0596327	0.055	0.011	51.4385
Rxfp1	0.00428185	0.0595919	0.047	0.007	64.1891
Exosc9	0.0783395	0.059563	0.191	0.128	987.627
Lrrc3b	0.0960481	0.059561	0.272	0.206	1179.09
Pigq	0.0691571	0.0595487	0.243	0.174	882.583
Tmem189	0.0403738	0.0595322	0.238	0.157	547.227
Csgalnact1	0.00526946	0.0594891	0.085	0.028	78.5413
Ubqln1	0.0304129	0.0594787	0.736	0.601	419.819
Taf11	0.0355686	0.0594341	0.443	0.32	486.4
Nap1l3	0.11453	0.0593681	0.647	0.523	1367.14
Fbxw4	0.0173561	0.059363	0.179	0.103	247.221
Armcx1	0.21264	0.0593279	0.515	0.441	2162.33
Phactr2	0.0134147	0.0592585	0.251	0.153	193.776
Tarsl2	0.00303771	0.0592185	0.255	0.135	45.9272
Rcl1	0.0845117	0.0592027	0.128	0.082	1055.89
Fkbp4	0.154988	0.0591659	0.609	0.512	1720.68
Nfrkb	0.0128898	0.0591413	0.243	0.142	186.632
Acap3	0.0465064	0.0591412	0.213	0.142	623
Morn2	0.0868986	0.0591376	0.43	0.32	1081.8
Ikzf4	0.23066	0.0591342	0.281	0.217	2298.76
Lamp1	0.178296	0.0590513	0.651	0.544	1920.07
Rab33a	0.00130043	0.0589779	0.098	0.028	19.9161
Rilpl1	0.0348728	0.0589609	0.196	0.121	477.443
Arhgap39	0.0308822	0.0589422	0.345	0.238	425.99
Trim62	0.0551973	0.0588961	0.166	0.107	727.722
Galc	0.0371267	0.05888	0.128	0.071	506.371
Glra1	0.095989	0.0588678	0.111	0.068	1178.55
Aldh2	0.0202745	0.0587456	0.174	0.1	286.579
Fgf12	0.179516	0.0587254	0.557	0.448	1929.08
Os9	0.0394077	0.0587237	0.477	0.345	535.551
Cntfr	0.0089928	0.0587173	0.251	0.146	131.906
Cherp	0.0258547	0.0587044	0.315	0.214	361.138
Rbms1	0.0557293	0.0586782	0.145	0.089	733.732
Hexim1	0.236652	0.0586728	0.238	0.192	2335.75
Elmod1	0.211054	0.0586005	0.766	0.673	2151.27
Zfp652	0.0450164	0.0585638	0.209	0.135	604.751
Gm31282	0.0194882	0.0585615	0.128	0.064	276.109
Nrcam	0.0432022	0.0585612	0.451	0.335	582.539
Tmem151b	0.0761797	0.0585569	0.409	0.295	963.369
Scn2a	0.184318	0.0585409	0.97	0.915	1969.62
Ahcy	0.00269475	0.0585059	0.085	0.025	40.8039
Pik3r4	0.00900445	0.0584264	0.221	0.121	132.059
Ube2j2	0.0697901	0.0583913	0.443	0.324	889.545
Gars	0.0348728	0.0583912	0.196	0.121	477.409
Aptx	0.186171	0.0583254	0.226	0.171	1985.51
Gtf2e1	0.0160321	0.0582847	0.119	0.057	229.339
Inpp5b	0.0263522	0.0582594	0.191	0.114	367.665
Tmem64	0.0373553	0.0581316	0.43	0.302	509.191
Zbtb2	0.00970777	0.0581225	0.085	0.032	142.054
Dazap1	0.0298817	0.0580616	0.387	0.27	412.936
Ap2a2	0.248206	0.0580278	0.83	0.722	2393.2
Sox2	0.150819	0.0580171	0.511	0.399	1690.53
D830030K20Rik	0.0645218	0.0580085	0.136	0.085	832.073
Klhl12	0.0279054	0.0580038	0.345	0.235	387.913
Wdr6	0.0584958	0.0579762	0.953	0.947	763.136
Npc2	0.0531178	0.0579546	0.332	0.235	703.067
Chst10	0.0303305	0.0579505	0.409	0.274	418.743
Ptpn11	0.0115256	0.0578755	0.617	0.427	167.641
Ablim1	0.0662593	0.057871	0.294	0.214	851.83
Gm42418	0.148817	0.0578431	0.723	0.601	1671.22
Mturn	0.027925	0.0577988	0.404	0.267	388.158
Rps6ka4	0.0101071	0.0577575	0.174	0.093	147.665
Ppp2r1a	0.158926	0.0577315	0.77	0.673	1753.43
Smim27	0.0126692	0.0576755	0.162	0.085	183.628
Fgf13	0.233123	0.0576318	0.396	0.335	2316.31
Rasgrp2	0.0461488	0.057618	0.434	0.31	618.439
St3gal2	0.0700089	0.0575568	0.366	0.263	891.984
Zfp91	0.207333	0.0575482	0.506	0.406	2119.15
Mmp15	0.0240414	0.0574861	0.102	0.05	337.229
Selenow	0.0400051	0.0574832	1	1	543.069
Gns	0.0562629	0.0574545	0.528	0.399	740.251
Dgke	0.0447016	0.0574097	0.409	0.292	600.879
Gpr68	0.0038988	0.0573861	0.094	0.032	58.5873
Psmd14	0.0104887	0.0573788	0.434	0.295	153.041
Pde4b	0.178435	0.057355	0.328	0.256	1921.03
Mpg	0.0555957	0.0573134	0.264	0.189	732.362
Gm28884	0.00120792	0.0572699	0.055	0.007	18.5174
Bud31	0.00890545	0.0572548	0.289	0.174	130.688
Pdzd4	0.0425937	0.057235	0.464	0.338	574.76
Slitrk2	0.360983	0.0572001	0.328	0.27	2783.18
Rbfa	0.0429045	0.0571697	0.213	0.139	578.696
St6galnac3	0.0120099	0.0571469	0.111	0.05	174.444
Arhgap35	0.342757	0.0571426	0.553	0.484	2703.66
Sap30bp	0.0612414	0.0571288	0.251	0.174	795.648
Fbn2	0.00188172	0.0571279	0.145	0.06	28.6699
Mrps27	0.00413849	0.0571253	0.145	0.064	62.1145
Cbfb	0.0164884	0.0571028	0.366	0.238	235.587
Zfp119a	0.00175858	0.0570985	0.068	0.014	26.829
Cacng2	0.306897	0.0570709	0.634	0.577	2550.32
Tyw1	0.0809797	0.0570532	0.157	0.103	1017.19
Mrpl47	0.0281448	0.0570137	0.196	0.117	391.044
Mcat	0.00637715	0.056971	0.145	0.068	94.554
Fstl1	0.227645	0.0569183	0.174	0.135	2277.36
Mia2	0.0187302	0.056901	0.217	0.128	265.838
Sec63	0.0354706	0.0568963	0.302	0.206	485.309
Arvcf	0.0152007	0.056872	0.2	0.114	218.008
Cope	0.189048	0.0568399	0.4	0.32	2008.63
Gramd4	0.0237759	0.0568185	0.17	0.1	333.67
Emc6	0.067791	0.0567652	0.613	0.488	866.708
Smg9	0.0340333	0.0567553	0.162	0.096	466.698
Aplp2	0.220141	0.0567348	0.838	0.794	2222.33
0610010K14Rik	0.00231916	0.0566728	0.153	0.064	35.2187
Lgmn	0.0942478	0.0566602	0.379	0.288	1161.79
Tomm70a	0.105511	0.0566248	0.821	0.726	1280.16
Acer3	0.0442993	0.0566127	0.26	0.178	596.092
Plcxd1	0.0270494	0.0565607	0.2	0.121	376.88
Gm15706	0.0110464	0.0565314	0.106	0.046	160.869
Arf5	0.362657	0.056485	0.706	0.605	2530.98
Asap3	0.0132575	0.0564802	0.077	0.028	191.584
Ermp1	0.0327108	0.0564615	0.226	0.142	449.413
Tbcc	0.0222848	0.0564389	0.149	0.082	313.547
Atox1	0.0412819	0.0564298	0.549	0.409	558.421
Baiap2	0.22354	0.0563458	0.46	0.381	2245.91
Ercc5	0.022428	0.0563309	0.179	0.103	315.472
Tmub2	0.0419068	0.0563167	0.289	0.199	566.077
Ppp2r5d	0.0313026	0.0562617	0.34	0.238	431.225
Ccdc58	0.0579629	0.0562274	0.145	0.089	760.879
Lrguk	6.66594e-05	0.0562248	0.055	0	1.04549
Pgbd5	0.0171606	0.0562026	0.264	0.164	244.521
Dnajc18	0.090867	0.0561923	0.591	0.459	1126.3
Rogdi	0.0409649	0.0561777	0.681	0.509	554.624
Gm47283	0.099048	0.05617	0.63	0.498	1210.47
Tnfrsf19	0.00668867	0.0560914	0.106	0.043	99.0391
Btbd2	0.0414007	0.056046	0.357	0.249	559.861
Coq8b	0.10852	0.0559968	0.23	0.167	1313.2
Gpalpp1	0.00341798	0.0559315	0.277	0.149	51.5294
Kat2a	0.0539393	0.0559229	0.281	0.196	712.646
Klhdc4	0.00315292	0.0559134	0.14	0.06	47.6279
Pcbp4	0.0575446	0.055911	0.549	0.416	755.791
Rhot1	0.0427189	0.0558762	0.366	0.256	576.406
Cnst	0.0111613	0.0558632	0.306	0.192	162.442
Rpa1	0.0563186	0.0557584	0.204	0.135	740.927
Garnl3	0.055022	0.0556836	0.374	0.274	725.686
Hprt	0.11941	0.0556539	0.77	0.644	1416.68
D930016D06Rik	0.0844893	0.0555837	0.281	0.199	1055.78
Plppr2	0.0511327	0.055575	0.587	0.456	679.348
Npm3	0.0503788	0.0555708	0.2	0.128	670.24
Snca	0.506972	0.0555551	0.494	0.459	2684.92
Gm12258	0.0844029	0.0555045	0.17	0.114	1055.12
Retreg3	0.0494808	0.0554848	0.217	0.142	659.678
Hsf2	0.29622	0.0554808	0.323	0.256	2502.47
Tomm5	0.151527	0.0554172	0.732	0.609	1696.95
Snapc1	0.0595358	0.055406	0.502	0.363	775.752
Sgcb	0.0529185	0.0553712	0.315	0.217	700.747
Mapre2	0.141252	0.0553088	0.847	0.744	1601.94
Mapt	0.105928	0.055268	0.983	0.964	1284.59
Sil1	0.0601045	0.0552545	0.149	0.093	782.441
Mrps2	0.0244332	0.0552526	0.183	0.107	342.333
Wdr11	0.0107244	0.0552269	0.217	0.121	156.319
Ndc1	0.0515503	0.0551901	0.14	0.085	684.073
Akirin2	0.0355843	0.0551866	0.443	0.306	486.58
Nphp3	0.01188	0.0551467	0.111	0.05	172.592
Hnrnpc	0.0716878	0.0551256	0.749	0.616	910.937
Sstr5	0.00175001	0.0551151	0.081	0.021	26.6998
Gm42517	0.00717231	0.055096	0.166	0.082	105.978
Mvk	0.0138663	0.0550888	0.111	0.05	199.993
Rexo2	0.171617	0.0550865	0.332	0.263	1860.32
Gm39244	0.039543	0.0550586	0.098	0.05	537.231
Tmem201	0.0697201	0.0550381	0.391	0.288	888.722
Nfatc3	0.0183086	0.0549999	0.162	0.089	260.11
Mgat3	0.011863	0.0549532	0.562	0.391	172.369
Nr2f2	0.15159	0.0549033	0.557	0.463	1697.36
Nacc2	0.495665	0.0549027	0.183	0.16	2663.7
Plekha3	0.0739872	0.0548918	0.332	0.242	937.64
Ubl5	0.336864	0.054864	0.851	0.779	2679.08
Dctn2	0.0522248	0.054855	0.472	0.352	692.135
Prtg	0.0042233	0.0548088	0.047	0.007	63.3494
March9	0.109628	0.0547045	0.191	0.135	1324.19
Mtx2	0.141496	0.0547023	0.247	0.185	1604.28
Usp22	0.0764546	0.0547014	0.936	0.907	966.233
Usp5	0.146389	0.0546929	0.596	0.477	1650.24
Mgat1	0.0828466	0.0546747	0.302	0.217	1038.23
Cited4	0.00962364	0.0546547	0.098	0.039	140.852
Kif21b	0.0234371	0.0546319	0.243	0.16	329.033
Atf6b	0.00740481	0.0546318	0.187	0.096	109.251
Polr1a	0.071428	0.0546306	0.294	0.214	907.992
Top2b	0.0669046	0.0545875	0.502	0.388	856.446
Sec11c	0.0205855	0.0545748	0.46	0.324	290.832
Elmo2	0.0407651	0.0545732	0.391	0.281	552.123
Selenot	0.104088	0.0545515	0.791	0.715	1264.57
Tnfaip8l3	0.00408007	0.0544571	0.047	0.007	61.25
Lrfn1	0.115192	0.0544546	0.387	0.292	1373.77
Gm43597	0.0331099	0.0544543	0.123	0.068	454.698
Gpr155	0.0363403	0.0543924	0.123	0.068	496.3
Rwdd4a	0.0451078	0.0543532	0.298	0.203	605.752
Nt5c3b	0.148334	0.0543522	0.14	0.1	1667.42
Qpct	0.00617275	0.0543391	0.187	0.096	91.5974
Fbxl18	0.0151464	0.0542692	0.183	0.103	217.274
Mc3r	0.0101437	0.0542691	0.157	0.078	148.159
Prr3	0.0736219	0.054263	0.417	0.299	933.452
Ndufa10	0.119218	0.0542457	0.715	0.559	1414.88
1700025G04Rik	0.131746	0.0541952	0.609	0.484	1508.89
Thsd7a	0.18098	0.0541787	0.23	0.171	1941.01
Rps6ka6	0.0366033	0.0541709	0.289	0.196	499.709
Brox	0.0708239	0.0541669	0.447	0.338	901.163
Ccser1	0.0343224	0.0541665	0.115	0.06	470.422
Zfp512b	0.0976799	0.0541458	0.268	0.199	1195.9
Top1mt	0.0469245	0.0541009	0.174	0.11	628.084
Pcdh1	0.0295239	0.053996	0.255	0.164	408.168
Kbtbd11	0.0549515	0.0539456	0.383	0.281	724.811
Zfp655	0.0141662	0.0539134	0.319	0.206	204.177
Tmem192	0.0659932	0.0539092	0.417	0.317	848.936
Rgp1	0.0180354	0.0539061	0.183	0.103	256.499
Itm2b	0.102665	0.0538799	0.872	0.794	1249.64
2610008E11Rik	0.181799	0.0538658	0.238	0.185	1947.98
0610037L13Rik	0.156263	0.0538568	0.213	0.157	1732.65
Agap1	0.286171	0.0537453	0.685	0.587	2453.63
Tctn1	0.0416384	0.0537364	0.119	0.068	562.826
Slc35f1	0.113004	0.0536878	0.353	0.263	1359.43
Mpped1	0.0853909	0.05366	0.221	0.157	1065.25
Srpr	0.07182	0.0536221	0.451	0.327	912.402
1110004F10Rik	0.1571	0.0536058	0.821	0.705	1739.56
Mea1	0.0889194	0.0535844	0.574	0.438	1104.56
Akap7	0.347481	0.0535623	0.502	0.448	2722.86
U2af1	0.130897	0.0535193	0.677	0.569	1501.26
Gbp7	0.000251233	0.0535187	0.047	0	3.90919
AC078895.1	0.00427067	0.0534772	0.094	0.032	64.0259
Rabif	0.0381184	0.0534602	0.298	0.199	518.906
Usp48	0.0864606	0.0534581	0.336	0.253	1077.04
Palm	0.0396375	0.0534143	0.387	0.27	538.396
Trim28	0.0445832	0.0534016	0.323	0.224	599.511
Gm26760	0.0125013	0.0533891	0.06	0.018	181.294
Wdr12	0.0960482	0.0533795	0.323	0.249	1178.99
Klhl32	0.0146043	0.0533786	0.311	0.196	209.922
Pag1	0.0374656	0.0533578	0.196	0.121	510.507
Ppp5c	0.405787	0.0533473	0.37	0.327	2623.01
Rab21	0.164663	0.0533112	0.66	0.552	1803.22
2900093K20Rik	0.0466304	0.0533097	0.247	0.164	624.474
Fam163b	0.0838691	0.053304	0.285	0.203	1049.29
Ppp4r2	0.052098	0.053278	0.57	0.438	690.507
Fam118b	0.0169116	0.0532126	0.145	0.075	241.193
Cdv3	0.324607	0.0531929	0.647	0.548	2622.5
Cops3	0.0803679	0.0531831	0.294	0.214	1010.22
Sprn	0.0443243	0.0531564	0.23	0.153	596.384
Atmin	0.232681	0.0530902	0.443	0.391	2313.31
Mapk6	0.0374682	0.0530704	0.391	0.27	510.504
Kifc2	0.0404204	0.0530696	0.536	0.377	547.818
Rad51d	0.0084913	0.053016	0.136	0.064	124.771
Cdh15	0.0695556	0.0529994	0.115	0.068	886.764
Neurl1a	0.0548893	0.0529905	0.323	0.224	724.045
Zfp580	0.0536997	0.0529875	0.187	0.117	709.748
Arhgef9	0.119184	0.0529708	0.749	0.63	1414.59
AC101921.1	0.0152599	0.0529706	0.14	0.071	218.812
Mmgt1	0.0203828	0.0529015	0.174	0.1	288.071
Pigk	0.0310725	0.0528766	0.545	0.388	428.366
Sec22a	0.0745467	0.0528286	0.247	0.181	944.283
Zic1	0.127598	0.0527315	0.115	0.075	1469.16
Rpl6	0.0751102	0.0527266	1	1	950.67
Tdrkh	0.0419846	0.0526652	0.34	0.235	566.96
Impdh2	0.0649659	0.0526223	0.366	0.263	837.02
Fndc5	0.0459568	0.052616	0.332	0.228	616.052
Sept6	0.0943301	0.0526152	0.323	0.238	1162.71
Pdp1	0.041425	0.0526103	0.528	0.381	560.149
Clint1	0.113059	0.0525416	0.37	0.278	1351.61
Sec22c	0.033701	0.0525199	0.298	0.203	462.343
Egr1	0.00326789	0.0525049	0.123	0.05	49.3353
Ppp4r4	0.00554441	0.0523928	0.226	0.121	82.5008
Atp6ap1	0.173542	0.052371	0.736	0.641	1876.51
Tkfc	0.0223246	0.0523637	0.089	0.039	314.062
Sc5d	0.0744545	0.0523031	0.417	0.313	943.339
Slc25a17	0.257531	0.0523009	0.315	0.26	2450.15
Kcnd2	0.119495	0.0522086	0.638	0.53	1417.45
Pyurf	0.0132754	0.052175	0.2	0.114	191.83
Cox5b	0.248552	0.0520777	0.889	0.833	2395.54
Cbx4	0.0234295	0.0520476	0.302	0.199	328.951
Atp6ap2	0.261171	0.0520325	0.706	0.658	2475.64
Llph	0.0857254	0.0519966	0.396	0.295	1068.74
Ndufaf3	0.0634177	0.0519817	0.502	0.384	819.42
A730046J19Rik	0.00859804	0.0519656	0.034	0.004	126.314
Dhx9	0.162067	0.051864	0.451	0.356	1780.79
Tubgcp6	0.0114509	0.0518583	0.162	0.085	166.599
C1galt1	0.0150538	0.0518114	0.094	0.039	216.037
Lzts1	0.108553	0.0517819	0.226	0.164	1313.28
Hrasls	0.0471347	0.0517798	0.285	0.196	630.851
Gdf11	0.168257	0.0517338	0.221	0.167	1833.16
Pitpnm3	0.0308892	0.0517298	0.332	0.231	426.054
Elfn2	0.088791	0.0516634	0.481	0.367	1103.49
St3gal1	0.0151242	0.0516321	0.136	0.068	216.987
Eif1	0.0467258	0.0516034	0.991	1	625.659
Mrpl33	0.0729279	0.0515948	0.596	0.477	925.382
Pank2	0.031596	0.0515934	0.285	0.181	435.171
Mrps31	0.120248	0.051588	0.132	0.089	1424.46
Prkaa1	0.0916239	0.05158	0.34	0.253	1134.67
[truncated: 14,007 more rows]

## Sheet: VgatEsr1P35MvsCast
	p_val	avg_logFC	pct.1	pct.2	p_val_adjust
Pgr	1.59998e-33	0.671914	0.799	0.356	2.60653e-29
Ptp4a1	2.94467e-27	0.579761	0.872	0.584	4.79657e-23
Irs4	8.18385e-29	0.552278	0.977	0.89	1.33315e-24
Nts	9.69325e-06	0.533392	0.485	0.352	0.155742
Napb	1.79142e-15	0.500774	0.98	0.915	2.9141e-11
1500009L16Rik	1.44408e-16	0.470087	0.759	0.488	2.34966e-12
Ogfrl1	5.10094e-17	0.467627	0.808	0.594	8.30128e-13
Cntnap2	2.54649e-17	0.452313	0.89	0.708	4.14441e-13
Id4	3.83818e-14	0.450869	0.849	0.577	6.24089e-10
Prkce	9.97883e-18	0.448519	0.86	0.637	1.62445e-13
Parm1	5.74548e-14	0.448159	0.535	0.242	9.34043e-10
Ctnna2	8.33753e-17	0.444964	0.767	0.473	1.35668e-12
Sv2c	9.50327e-12	0.439084	0.602	0.37	1.5421e-07
Lamp5	3.79147e-15	0.43819	0.36	0.1	6.16683e-11
Tmem35a	2.24693e-11	0.424784	0.648	0.423	3.64542e-07
Grik1	9.60941e-14	0.412609	0.654	0.342	1.56191e-09
Sez6l	7.32264e-17	0.405322	0.916	0.783	1.19161e-12
Ctnnb1	2.68885e-13	0.386524	0.808	0.573	4.36803e-09
Pdzrn4	3.48921e-13	0.386272	0.814	0.58	5.66788e-09
Nexmif	5.90169e-12	0.383005	0.683	0.42	9.57963e-08
Pcp4	1.03689e-08	0.378887	0.991	0.979	0.000167872
Apoc3	6.7945e-12	0.373092	0.436	0.178	1.10268e-07
Nos1	7.16098e-07	0.351292	0.547	0.359	0.0115557
Gfra1	1.55095e-11	0.348971	0.526	0.27	2.51657e-07
Gnai1	2.84029e-11	0.346916	0.759	0.534	4.60753e-07
Fam171b	8.03817e-11	0.34522	0.924	0.786	1.30363e-06
Maged1	5.78439e-16	0.344532	0.956	0.868	9.41062e-12
Pak3	1.77333e-17	0.340796	0.988	0.94	2.88627e-13
Actg1	2.86793e-16	0.336595	0.994	0.872	4.66613e-12
Ets2	6.71875e-12	0.325166	0.744	0.484	1.09045e-07
mt-Co2	1.30865e-38	0.316506	1	0.996	2.13205e-34
Dgkb	2.77723e-10	0.315935	0.753	0.459	4.50188e-06
Hmgcs1	5.94056e-08	0.314379	0.82	0.68	0.000960528
Map1a	5.69705e-12	0.31177	0.852	0.662	9.24802e-08
Thy1	4.98972e-07	0.3105	0.826	0.708	0.0080544
mt-Atp6	1.8504e-41	0.310108	1	1	3.01485e-37
mt-Nd4l	1.16035e-13	0.30946	0.866	0.676	1.88591e-09
Fgfr1	0.000113664	0.308236	0.608	0.466	1.81227
Ankrd46	5.24729e-09	0.307867	0.724	0.544	8.49851e-05
Scml4	4.56532e-10	0.28736	0.392	0.164	7.39992e-06
Olfm3	1.04127e-06	0.282613	0.66	0.47	0.0167989
Pgam1	9.01453e-09	0.279823	0.875	0.765	0.000145963
Calm3	1.18008e-12	0.274946	0.983	0.915	1.91622e-08
Abat	1.40534e-09	0.274228	0.916	0.776	2.27736e-05
Hpcal1	1.62205e-08	0.273735	0.878	0.705	0.000262578
Gpr83	4.46836e-06	0.272159	0.212	0.082	0.0718915
Zbtb20	8.46127e-05	0.271664	0.93	0.907	1.35126
Eif4g2	8.05475e-14	0.271415	0.988	0.95	1.3093e-09
Itm2c	1.18189e-13	0.271386	0.997	0.975	1.9208e-09
Irs2	5.57808e-09	0.271039	0.48	0.26	9.0337e-05
mt-Nd3	1.30169e-13	0.26534	0.988	0.943	2.11538e-09
Gm16485	1.12466e-12	0.265198	0.32	0.085	1.82634e-08
Cbx6	2.19003e-09	0.263266	0.887	0.79	3.54828e-05
Magi1	1.63017e-08	0.2611	0.773	0.601	0.000263876
Eif1b	2.93601e-11	0.260828	0.977	0.897	4.7625e-07
Tubb3	4.78642e-08	0.260713	0.794	0.609	0.000774156
Pcdh7	3.7593e-07	0.260274	0.91	0.84	0.0060694
Dynll2	5.939e-14	0.259242	0.994	0.979	9.65443e-10
Nrip1	1.19375e-06	0.257631	0.488	0.31	0.0192552
Aatk	5.85606e-08	0.257481	0.77	0.555	0.000946984
Cstf2	1.42511e-06	0.253394	0.599	0.409	0.0229827
Hs3st5	3.26288e-07	0.253164	0.453	0.26	0.00526988
Kif5a	3.2606e-08	0.249936	0.922	0.765	0.000527435
Syt6	6.73952e-06	0.249742	0.363	0.206	0.108365
Lynx1	1.08943e-06	0.248477	0.616	0.431	0.0175748
Dcaf7	6.09197e-08	0.246446	0.892	0.786	0.000984949
Crim1	0.00108938	0.244946	0.666	0.562	17.1023
Ywhag	3.84507e-15	0.244454	1	1	6.25362e-11
Socs2	2.20451e-10	0.244336	0.151	0.007	3.57395e-06
Gm10076	3.4821e-08	0.244024	0.817	0.609	0.00056323
mt-Nd2	1.51981e-17	0.242831	1	0.993	2.47379e-13
Rasgrf2	0.00107763	0.241126	0.689	0.609	16.9231
Ywhah	2.63026e-12	0.241109	0.997	0.982	4.27048e-08
Nat8l	4.07292e-07	0.240992	0.645	0.445	0.00657533
Adgrl1	3.29767e-09	0.239053	0.939	0.843	5.34255e-05
Scd2	5.95406e-07	0.238451	0.93	0.858	0.00960926
mt-Nd1	2.37613e-21	0.236365	1	1	3.86976e-17
1110008P14Rik	1.94241e-07	0.236357	0.808	0.609	0.00313816
Greb1	1.59337e-10	0.235337	0.212	0.036	2.58365e-06
Zmat4	2.23479e-06	0.233268	0.552	0.37	0.0360024
Nr2f2	0.00113703	0.233262	0.59	0.463	17.8377
Spock1	0.000577293	0.233049	0.77	0.694	9.11661
Csnk1g2	8.02713e-07	0.233017	0.5	0.295	0.0129526
Sult4a1	4.19754e-06	0.232697	0.814	0.669	0.0675384
Hs3st2	8.25307e-12	0.232684	0.195	0.018	1.33931e-07
Atp2a2	2.90698e-08	0.230487	0.91	0.811	0.000470263
mt-Nd5	7.81463e-11	0.22981	0.965	0.886	1.26746e-06
Camk4	0.000197489	0.229771	0.448	0.313	3.14067
Htr1b	7.21877e-06	0.229656	0.413	0.231	0.116034
Myh10	3.64008e-07	0.227695	0.741	0.509	0.00587764
Brinp2	2.10567e-06	0.227344	0.564	0.356	0.0339351
Rnf112	1.92162e-06	0.226528	0.718	0.527	0.0309727
Drp2	3.57434e-06	0.226212	0.427	0.26	0.057529
mt-Nd4	1.53295e-20	0.226042	1	0.996	2.49641e-16
Stk19	2.93235e-05	0.225043	0.465	0.302	0.470027
Pdha1	2.10598e-06	0.224562	0.642	0.445	0.0339379
Kcns2	0.000138698	0.224293	0.36	0.224	2.20974
Gal	0.00117001	0.224037	0.352	0.231	18.3481
Cdkl5	1.02871e-05	0.222889	0.558	0.37	0.165262
Tspyl4	3.51968e-09	0.222407	0.959	0.918	5.70188e-05
Tnfrsf21	2.78379e-06	0.221888	0.558	0.359	0.0448191
Ergic1	1.73011e-06	0.2206	0.68	0.491	0.0278877
Nudt10	4.51554e-06	0.220588	0.5	0.324	0.072646
Chst11	2.42928e-08	0.220336	0.392	0.181	0.000393057
Cartpt	0.00107838	0.220141	0.148	0.068	16.9337
Gabra5	2.18485e-06	0.219823	0.471	0.274	0.0352001
Map2k4	2.02013e-07	0.217556	0.866	0.698	0.00326352
Camk2b	1.69627e-07	0.217072	0.927	0.858	0.00274117
Clstn3	4.64249e-05	0.217058	0.791	0.69	0.743309
Svop	1.02577e-06	0.216654	0.692	0.544	0.0165498
Hspa4	3.74915e-07	0.216257	0.715	0.537	0.00605338
Arxes1	1.83008e-07	0.215939	0.506	0.292	0.00295705
Oxct1	7.73229e-05	0.214839	0.666	0.544	1.23554
Odc1	2.37947e-05	0.214512	0.596	0.413	0.381548
Fam8a1	4.10446e-05	0.213255	0.762	0.616	0.657371
Col25a1	0.000377877	0.213023	0.349	0.221	5.98519
Kcnk2	0.000328861	0.212445	0.762	0.641	5.21343
Dnm3	4.69687e-06	0.212099	0.89	0.769	0.0755586
Arf3	1.74643e-07	0.211365	0.953	0.879	0.00282205
Cdkl2	7.13723e-06	0.211219	0.645	0.47	0.114731
Ppp2r2c	2.56629e-06	0.210674	0.84	0.722	0.0413326
Scoc	5.04007e-07	0.210287	0.939	0.875	0.00813517
Aes	2.36465e-06	0.209985	0.936	0.829	0.0380922
Arxes2	1.18128e-05	0.209977	0.802	0.655	0.189762
Epm2a	2.78013e-06	0.209804	0.413	0.224	0.0447629
Map2k1	1.71009e-06	0.209164	0.843	0.694	0.0275667
Ndrg4	2.70521e-08	0.208829	0.962	0.961	0.000437676
Pik3r3	3.7213e-06	0.207347	0.34	0.171	0.0598905
Asic2	8.32736e-07	0.205643	0.477	0.274	0.0134362
Marcksl1	4.07002e-06	0.205344	0.942	0.865	0.0654948
Fam168b	1.59643e-05	0.204149	0.686	0.502	0.256275
Fstl5	7.02597e-05	0.20406	0.846	0.712	1.12331
Galnt16	2.33748e-05	0.203982	0.799	0.648	0.374838
Ube2j1	0.000190208	0.203088	0.602	0.477	3.02583
Fam107a	2.86255e-07	0.203001	0.308	0.132	0.00462387
Eef1a2	2.63818e-06	0.202313	0.61	0.409	0.0424827
Tmem215	2.45594e-06	0.201629	0.224	0.085	0.0395603
Hras	5.2785e-06	0.200971	0.837	0.683	0.0848995
Prkacb	1.22949e-07	0.200223	0.994	0.982	0.00198735
Nell2	0.000155533	0.199417	0.538	0.391	2.47671
Cltc	1.85568e-05	0.199148	0.939	0.872	0.2978
Scrn1	7.87233e-05	0.19908	0.852	0.765	1.25776
Arhgdia	8.49491e-05	0.198186	0.791	0.658	1.35655
Ablim2	1.48323e-06	0.197307	0.439	0.246	0.0239155
Cadm4	1.79816e-05	0.196934	0.59	0.416	0.288587
Dner	0.000247344	0.195782	0.808	0.719	3.92783
Fkbp5	3.99785e-09	0.195613	0.285	0.093	6.47532e-05
Ube2n	1.55917e-05	0.195564	0.811	0.658	0.250325
Elmo1	0.000314936	0.194512	0.648	0.505	4.99362
Ap1s2	0.0373281	0.194002	0.564	0.484	528.005
Fam199x	2.60567e-06	0.193863	0.416	0.224	0.0419617
Camk2n2	2.83909e-05	0.193338	0.828	0.673	0.455106
mt-Co1	1.82268e-21	0.193317	1	1	2.9686e-17
Kdm7a	2.13943e-06	0.192796	0.358	0.181	0.0344705
Got1	1.86362e-05	0.192606	0.677	0.502	0.299055
Mllt11	7.73566e-08	0.192319	0.983	0.929	0.00125055
Aldoc	3.62533e-05	0.19153	0.526	0.359	0.580813
Tollip	5.12554e-05	0.191217	0.558	0.388	0.820086
AF529169	5.31448e-08	0.191153	0.23	0.068	0.000859511
Slc25a12	4.13228e-05	0.191076	0.608	0.42	0.661784
Hspa5	0.000784515	0.190805	0.715	0.594	12.3647
Wdr26	0.000122749	0.19025	0.61	0.441	1.95649
Idi1	0.000104304	0.190224	0.375	0.235	1.66354
Adra2a	0.000102626	0.188022	0.265	0.139	1.63688
Ipo5	2.29178e-05	0.187849	0.506	0.345	0.367555
mt-Cytb	5.1128e-14	0.187438	1	1	8.3124e-10
Plp1	0.0001648	0.186714	0.753	0.619	2.62295
Mblac2	5.12495e-05	0.186334	0.602	0.431	0.820043
Sytl4	2.12779e-07	0.18569	0.108	0.007	0.00343723
Ap3b2	1.88018e-05	0.185457	0.48	0.295	0.301694
Ap2m1	5.09212e-05	0.185219	0.846	0.733	0.814842
Cdh4	3.99311e-06	0.185034	0.36	0.192	0.0642612
Stx7	1.91092e-05	0.184895	0.765	0.609	0.306607
Ubqln2	0.00124063	0.184809	0.779	0.708	19.4481
Ywhaq	3.53812e-06	0.184645	0.945	0.897	0.0569495
Hpcal4	4.7755e-05	0.182913	0.817	0.698	0.764462
Wnt4	0.000299705	0.182356	0.25	0.142	4.75332
Lonrf2	1.02204e-05	0.181862	0.939	0.897	0.1642
mt-Co3	1.2978e-17	0.181774	1	1	2.11256e-13
Pappa	5.04876e-06	0.180936	0.18	0.057	0.0812094
Calr	8.09499e-06	0.180859	0.878	0.74	0.130103
Cul4a	4.22989e-05	0.180386	0.41	0.253	0.677375
Cnih2	4.0284e-05	0.180085	0.869	0.73	0.645229
Sccpdh	0.000433301	0.179728	0.605	0.459	6.85699
Ccdc92	0.000624047	0.179293	0.637	0.516	9.85183
Tmem179	0.000110404	0.179171	0.823	0.712	1.7604
Ppp2ca	1.43681e-05	0.17912	0.89	0.772	0.230722
Prkar1b	1.45882e-05	0.179014	0.983	0.947	0.234243
Tuba4a	0.000118564	0.178628	0.73	0.58	1.89003
Spock3	0.0138409	0.178543	0.715	0.633	206.7
Arf1	2.75967e-06	0.177523	0.933	0.868	0.0444362
Ppp2r1a	1.68396e-05	0.177286	0.82	0.673	0.270293
Pitpnc1	0.00202922	0.176718	0.567	0.431	31.6173
Hsbp1	0.000119592	0.176294	0.881	0.804	1.9063
Ids	7.82148e-05	0.176188	0.872	0.808	1.24972
Mtmr6	8.3782e-05	0.175884	0.666	0.495	1.33825
Ldlr	8.92534e-06	0.175367	0.314	0.157	0.143421
Syn1	0.000242051	0.175362	0.762	0.669	3.84425
Ube2v2	0.000130881	0.174565	0.733	0.616	2.08585
Ddhd1	0.00302618	0.1745	0.439	0.335	46.8967
Hcrtr1	7.96596e-10	0.174369	0.157	0.014	1.29096e-05
Nudt4	3.85424e-05	0.174075	0.465	0.292	0.617372
Pafah1b2	0.000145122	0.173958	0.852	0.744	2.3118
Psd3	0.000501969	0.173914	0.701	0.562	7.93664
Sipa1l1	0.000748231	0.173881	0.433	0.299	11.7966
Maf	3.5377e-05	0.173757	0.145	0.046	0.566846
Gabrb3	0.000210379	0.172859	0.846	0.712	3.34398
Ret	6.38547e-05	0.172802	0.186	0.075	1.02104
Purb	9.93647e-05	0.172772	0.901	0.822	1.58536
Galnt17	0.000327594	0.172735	0.439	0.299	5.19368
Cbarp	3.63997e-07	0.172717	0.991	0.982	0.00587782
Oprl1	0.00190991	0.170874	0.622	0.516	29.7908
Atp1a1	0.000692712	0.170042	0.544	0.413	10.9282
Bzw1	0.000159913	0.170007	0.532	0.359	2.54582
Dcp2	0.000810509	0.169983	0.509	0.363	12.7688
Sar1a	2.30522e-05	0.169964	0.692	0.488	0.369688
Cib2	0.000357115	0.169955	0.698	0.559	5.65849
Nampt	5.29375e-06	0.169626	0.328	0.164	0.0851394
Nefh	1.69556e-06	0.169459	0.291	0.128	0.0273341
Canx	3.73046e-05	0.169283	0.959	0.925	0.597582
Scn1b	0.000302541	0.16914	0.535	0.399	4.7977
Hnrnpu	2.38672e-05	0.168942	0.91	0.786	0.382686
Gde1	4.77935e-05	0.168759	0.599	0.441	0.76503
Tmcc3	0.00172236	0.168398	0.808	0.712	26.8981
Syndig1l	6.77568e-06	0.168382	0.186	0.064	0.108939
Stx1b	0.000273663	0.167735	0.799	0.726	4.34221
Ubl3	0.00849685	0.167472	0.683	0.601	128.965
Atp13a2	5.94337e-05	0.167145	0.512	0.331	0.950464
Spcs3	1.23027e-06	0.166944	0.36	0.174	0.019843
Sall2	0.000366824	0.166684	0.512	0.363	5.81159
Rpn2	2.58325e-06	0.166242	0.404	0.217	0.0416032
Mrpl20	7.57838e-05	0.165248	0.523	0.363	1.21118
Cmpk1	0.000268091	0.165128	0.613	0.459	4.2546
Rab3c	0.000734327	0.164909	0.907	0.847	11.5789
Atp6v1a	3.06488e-06	0.164485	0.98	0.936	0.0493416
Gpr101	0.0547585	0.164228	0.407	0.342	751.451
March9	8.76753e-05	0.163695	0.259	0.135	1.39982
Sv2a	1.93466e-06	0.163467	0.98	0.943	0.031181
Cygb	0.000313549	0.163246	0.619	0.452	4.97194
Khdrbs3	0.000569909	0.162541	0.485	0.342	9.00228
Tubb4a	0.000818839	0.162117	0.852	0.747	12.8967
Shisa2	0.000266877	0.162073	0.174	0.075	4.23561
Eif4g1	0.000173752	0.161925	0.674	0.491	2.76457
Pnma3	0.000518393	0.161802	0.596	0.438	8.19319
Mxd4	8.05251e-05	0.161795	0.453	0.288	1.28631
Got2	0.0035716	0.16141	0.712	0.623	55.1955
Cpe	0.000135938	0.161178	0.951	0.907	2.16603
Tcaf1	5.88026e-05	0.161175	0.927	0.811	0.94043
Minos1	9.20771e-05	0.161055	0.881	0.819	1.46983
Kalrn	5.72946e-05	0.160849	0.674	0.505	0.916427
Ncald	0.00586018	0.160486	0.709	0.605	89.7311
Caln1	0.000812194	0.160276	0.369	0.238	12.7937
Pebp1	0.000125851	0.160173	0.922	0.847	2.00581
Ogdh	0.000216705	0.159949	0.715	0.559	3.44387
Hs2st1	0.00208973	0.159798	0.631	0.463	32.558
Stk39	2.66391e-05	0.159767	0.43	0.256	0.427052
Tcf25	1.55094e-05	0.159681	0.98	0.929	0.24902
Selenof	0.000214779	0.159363	0.68	0.53	3.41348
Mapk3	0.0019052	0.159136	0.52	0.406	29.7192
Shisa4	8.6742e-05	0.158959	0.593	0.409	1.3851
Trim32	0.00209926	0.158913	0.689	0.541	32.7022
Dhcr24	0.000573073	0.158858	0.422	0.274	9.05169
Fbxo3	0.000173137	0.158141	0.733	0.577	2.75495
Eif1a	0.000536445	0.157696	0.599	0.431	8.47797
Elovl6	0.00165919	0.157472	0.523	0.399	25.9182
Slc12a5	0.00057651	0.157326	0.913	0.868	9.10482
Tubb2a	0.000253775	0.157246	0.759	0.58	4.02945
Pdcd4	0.00132636	0.157217	0.826	0.705	20.7774
Tmem50b	0.000627953	0.157174	0.576	0.416	9.91287
Kcnab2	7.59775e-05	0.156719	0.288	0.153	1.2142
Dhx40	4.97855e-05	0.156685	0.238	0.11	0.796767
Fxyd7	0.000425134	0.15608	0.477	0.335	6.72902
Ube2h	0.000212068	0.155984	0.581	0.402	3.37061
B4galt6	9.24641e-05	0.155707	0.962	0.9	1.47591
Phyhipl	0.000911176	0.155437	0.61	0.48	14.3392
Cdk16	0.000481246	0.155368	0.427	0.288	7.61091
Rap1gap	0.0009415	0.155367	0.648	0.523	14.8098
Eno2	0.00174091	0.155011	0.907	0.858	27.1843
Slitrk6	1.66112e-05	0.154162	0.169	0.057	0.266643
Grsf1	0.000358697	0.153777	0.529	0.377	5.68319
Caprin1	0.00103947	0.153445	0.869	0.765	16.329
Ndufab1	0.000869823	0.153169	0.698	0.562	13.6928
Tesk1	9.67588e-05	0.152971	0.355	0.206	1.54408
Fyttd1	0.00405044	0.152938	0.73	0.637	62.4497
Dhcr7	6.87171e-05	0.152802	0.265	0.135	1.09872
Zmym1	0.00233432	0.152613	0.616	0.491	36.3243
Hapln4	0.000350981	0.152559	0.387	0.249	5.56199
Kbtbd7	0.000946562	0.151941	0.413	0.281	14.8875
Nlgn3	0.00134546	0.151638	0.721	0.609	21.0698
Rab6b	0.000209761	0.151571	0.892	0.804	3.33436
Saraf	1.73318e-05	0.151497	0.924	0.872	0.278176
Pigq	7.65153e-05	0.151376	0.311	0.174	1.22271
Tspyl3	0.00202418	0.151304	0.448	0.338	31.5447
Rac3	0.000239018	0.15123	0.59	0.423	3.79656
Efemp1	7.04819e-06	0.151207	0.093	0.011	0.113307
Fscn1	1.40059e-05	0.151123	0.398	0.21	0.224921
Ubqln1	0.000409332	0.151105	0.727	0.601	6.48055
Cep170b	0.000259294	0.150981	0.715	0.569	4.11603
Atp1b3	0.0066712	0.150892	0.683	0.591	101.856
Tpi1	0.00239147	0.150554	0.814	0.726	37.1994
Abca3	3.30594e-05	0.15055	0.471	0.288	0.529777
Trp53i11	0.00429959	0.150301	0.308	0.21	66.2051
Neurl4	2.03716e-05	0.150119	0.256	0.117	0.326822
Tmem29	0.0010406	0.149902	0.558	0.427	16.3457
Reep2	0.0013348	0.149609	0.631	0.477	20.9084
Dapk1	0.00151392	0.148985	0.532	0.391	23.6746
Atp6v0d1	0.002853	0.148784	0.645	0.516	44.2415
Inpp5f	0.00339378	0.148728	0.89	0.801	52.4984
Vdac1	0.000637092	0.148649	0.802	0.687	10.0546
Neo1	0.00979729	0.14853	0.416	0.32	148.076
Phactr1	0.00563688	0.148322	0.616	0.502	86.3739
Mtmr4	7.965e-05	0.147811	0.529	0.363	1.27241
Sybu	0.00200754	0.147612	0.642	0.509	31.2975
Abca1	1.19507e-05	0.147381	0.09	0.011	0.191965
Fut9	0.00214196	0.1473	0.674	0.544	33.361
Tmsb10	6.78282e-06	0.147224	1	0.996	0.109047
Map1lc3a	0.000513917	0.147183	0.907	0.84	8.12348
Syp	0.000238826	0.146927	0.968	0.918	3.79375
Slc36a4	0.000738015	0.146537	0.573	0.427	11.6363
Adap1	4.39903e-05	0.146126	0.442	0.256	0.704416
Trp53inp2	0.000168747	0.145876	0.343	0.203	2.68528
Nars	0.00329945	0.145803	0.744	0.637	51.0557
Lgi3	4.70341e-05	0.145744	0.343	0.181	0.752969
Ube2z	0.00051087	0.145656	0.549	0.395	8.07634
A330069E16Rik	0.0198739	0.145437	0.279	0.196	292.344
Pin1	0.00114218	0.145406	0.578	0.438	17.9174
Ptpn5	0.0027129	0.144958	0.709	0.577	42.1096
Mapk10	0.00393816	0.144865	0.654	0.53	60.7462
Camkv	0.00157343	0.144727	0.625	0.491	24.5974
Fundc2	7.31787e-05	0.144627	0.506	0.331	1.16969
H1f0	0.000698076	0.144412	0.387	0.246	11.0121
Carm1	9.70447e-05	0.144246	0.297	0.164	1.54854
Jph3	0.000954026	0.144023	0.547	0.413	15.003
Ifngr2	0.000209042	0.143883	0.328	0.196	3.32314
Scamp1	0.00083933	0.143853	0.823	0.73	13.2161
Dnah1	0.000132175	0.143745	0.23	0.114	2.10621
Vsnl1	0.029394	0.143695	0.741	0.705	421.834
Clcn4	0.00179383	0.143645	0.532	0.416	27.9945
Atp6v1g2	0.000784557	0.143575	0.866	0.772	12.3646
Pitpna	0.00316047	0.143445	0.727	0.601	48.9462
Mark4	0.000405805	0.14336	0.32	0.189	6.42511
Ucp2	0.000367651	0.143346	0.262	0.139	5.82432
Glyr1	0.000920166	0.142899	0.762	0.637	14.4779
Smap2	0.00178263	0.142828	0.64	0.488	27.8214
Ssr3	0.00322937	0.142805	0.744	0.616	50.0004
Pdia6	0.00243753	0.142798	0.485	0.377	37.9035
Idh3a	0.00106208	0.142565	0.689	0.562	16.681
Tiparp	8.63151e-06	0.142536	0.189	0.068	0.138708
Chml	0.000255323	0.142037	0.256	0.135	4.0535
Rnf157	0.00107995	0.141954	0.593	0.456	16.9574
Eps15	0.000447117	0.141326	0.523	0.352	7.07383
Nbea	0.00197125	0.141183	0.82	0.705	30.7377
Dmtn	0.00157364	0.141147	0.695	0.537	24.5991
Pdcd7	0.00127263	0.141094	0.494	0.349	19.9447
Fxyd2	0.00800805	0.141017	0.305	0.21	121.722
Hk1	0.00402146	0.140859	0.599	0.477	62.015
Pkm	0.00119823	0.140649	0.945	0.868	18.7871
Dclk1	0.000659013	0.140611	0.927	0.843	10.3999
Adcy3	0.000274001	0.140433	0.381	0.238	4.34729
Gpd2	0.00123219	0.140136	0.57	0.42	19.3171
Rybp	0.000146505	0.140115	0.605	0.42	2.33339
Epha10	0.000584277	0.139852	0.265	0.153	9.22573
Letm1	0.00067933	0.139779	0.294	0.174	10.7178
Pdxp	0.000167113	0.1395	0.855	0.754	2.6596
5031439G07Rik	9.97167e-05	0.139365	0.509	0.331	1.59088
Tspan17	7.02982e-05	0.139163	0.436	0.267	1.12386
Hyou1	0.000434115	0.139049	0.23	0.117	6.869
Znrf1	0.000354045	0.138949	0.52	0.352	5.6102
Foxk2	0.0026496	0.138918	0.334	0.224	41.1404
Abce1	0.0008818	0.138616	0.448	0.317	13.8795
Hmgcr	0.00110272	0.138536	0.602	0.448	17.3072
Mrap2	0.186758	0.138509	0.387	0.363	2077.12
Map2k7	0.00299331	0.138428	0.526	0.399	46.3903
Nova1	0.00560763	0.138393	0.602	0.47	85.9369
Galnt13	0.00353045	0.13814	0.485	0.356	54.5772
Sdc3	0.0018805	0.138129	0.677	0.527	29.3377
Srcin1	0.0032707	0.138074	0.741	0.633	50.6239
Phf6	0.00192169	0.137918	0.378	0.26	29.9707
Eef1e1	0.00166313	0.137735	0.5	0.367	25.9781
Mtfr1l	0.00230721	0.137677	0.352	0.238	35.9095
Pdia3	0.000583999	0.137418	0.552	0.402	9.22193
Rbbp7	0.00733387	0.137412	0.544	0.423	111.739
Ankrd50	0.00028914	0.13735	0.468	0.299	4.58662
Rap1gds1	0.00351232	0.137226	0.683	0.544	54.3039
Golga7b	0.00984865	0.13719	0.529	0.441	148.813
D5Ertd579e	0.000417744	0.137142	0.532	0.363	6.61246
Top2b	0.00493204	0.136904	0.5	0.388	75.7758
Aifm3	0.00202527	0.136892	0.311	0.192	31.5578
Chn1	0.0214936	0.136867	0.735	0.648	314.817
Rnf10	0.00232398	0.136852	0.701	0.573	36.1681
Slc6a17	0.00110456	0.136637	0.805	0.687	17.3339
Clptm1l	0.0038846	0.136607	0.48	0.356	59.9394
Lcorl	0.00498761	0.136605	0.302	0.203	76.5948
Tmem164	3.14205e-05	0.136278	0.206	0.082	0.503576
Scn2b	0.00578514	0.136021	0.735	0.648	88.6168
Olfm2	0.00217514	0.13599	0.424	0.306	33.8734
Trank1	0.00485054	0.135967	0.593	0.484	74.5528
Cfl1	0.000819412	0.135948	0.956	0.907	12.9049
Ncoa7	0.00749647	0.135712	0.881	0.783	114.156
Wwc1	0.000101785	0.135404	0.215	0.1	1.62358
Idh1	0.00172138	0.135271	0.442	0.313	26.8844
Ywhae	8.29461e-06	0.135186	0.997	0.961	0.133303
Fam217b	0.00698368	0.135117	0.506	0.384	106.494
Cntnap1	0.000163091	0.135047	0.363	0.21	2.59593
Snn	0.00984322	0.135025	0.59	0.473	148.741
Ric8a	5.44934e-05	0.134925	0.273	0.135	0.871785
Adam11	0.00134607	0.134748	0.302	0.189	21.0781
Camsap2	0.000722781	0.134619	0.669	0.498	11.399
Strn4	0.000880082	0.134547	0.442	0.295	13.8534
Nlk	0.00022348	0.134373	0.422	0.27	3.55087
Dgat2	0.000156589	0.134148	0.227	0.11	2.49337
Ecel1	0.0126715	0.133768	0.674	0.569	189.794
Nfe2l1	0.00274403	0.133488	0.802	0.726	42.5819
Gria1	0.00793436	0.133332	0.791	0.719	120.658
Pfn2	0.000465571	0.133272	0.945	0.886	7.3644
Calm1	2.41592e-05	0.133241	0.991	0.993	0.387344
Tbc1d9b	0.000232772	0.133217	0.381	0.224	3.69782
Ap2a1	0.000922849	0.13295	0.485	0.335	14.5192
Ccnb1ip1	0.00419218	0.132884	0.366	0.256	64.5931
Cyc1	0.00242983	0.132826	0.555	0.402	37.7863
Astn1	0.00131105	0.132763	0.907	0.833	20.5429
Rnf14	0.0012574	0.132738	0.875	0.74	19.7072
Dld	0.00251004	0.132585	0.404	0.288	39.0136
Sept11	0.00472851	0.13257	0.613	0.495	72.715
Insig1	0.000196537	0.132424	0.439	0.278	3.12572
Rab2a	0.00489882	0.132376	0.852	0.776	75.2752
Rbms3	0.163139	0.132353	0.358	0.317	1875.61
Prkag2	0.000294986	0.132286	0.328	0.185	4.67877
Cfap36	0.000100659	0.13213	0.549	0.356	1.60581
Eif4e	0.0024029	0.131979	0.762	0.655	37.3722
Strap	0.000637004	0.131605	0.669	0.52	10.0538
Cacul1	0.00910805	0.131451	0.593	0.463	137.996
Limk1	0.00520813	0.131378	0.419	0.306	79.9343
Bsg	0.00379147	0.131375	0.846	0.733	58.529
Hnrnpul2	0.00584612	0.13135	0.747	0.655	89.5334
Tnxb	6.0094e-06	0.13132	0.102	0.014	0.0966372
Cdc27	0.0027497	0.131284	0.416	0.292	42.6617
Slc32a1	0.00655796	0.131102	0.852	0.758	100.16
Mapk1	0.000999016	0.130876	0.93	0.872	15.7045
Dcaf8	0.00422582	0.130705	0.596	0.48	65.1073
Hsp90b1	0.006531	0.130641	0.797	0.747	99.7741
Tmem26	0.000143938	0.130603	0.131	0.043	2.29307
Mkrn1	0.000811085	0.130485	0.491	0.349	12.777
Gmfb	0.00138696	0.130479	0.669	0.512	21.7114
Cnot7	0.00665801	0.130479	0.631	0.502	101.661
Rnd2	0.000719867	0.130402	0.547	0.391	11.3537
Tmx2	0.00590284	0.130299	0.794	0.719	90.3784
Txnrd1	0.00362933	0.130088	0.491	0.359	56.0732
Chrnb2	0.015878	0.13001	0.41	0.299	235.788
Nptn	0.00201832	0.129893	0.846	0.744	31.4615
Mrpl42	0.000282694	0.129657	0.631	0.47	4.48495
Akt1	0.00323299	0.129654	0.52	0.381	50.0531
Ccny	0.00256124	0.129645	0.297	0.189	39.7864
Lrrfip1	0.00143175	0.129463	0.273	0.167	22.4068
Actb	0.000479872	0.129183	0.997	0.979	7.59013
Tmem30a	0.0002068	0.129175	0.904	0.861	3.28791
Reep1	0.0350682	0.129125	0.689	0.58	498.178
Actr3	0.00539307	0.128884	0.733	0.605	82.7243
Uqcrb	0.00494287	0.12887	0.75	0.644	75.9323
Crocc	0.00176154	0.128688	0.416	0.285	27.4994
Slitrk2	0.0115791	0.128552	0.378	0.27	173.907
Acvr1c	2.22756e-05	0.128524	0.087	0.011	0.357278
Osbpl2	0.000230733	0.128283	0.419	0.263	3.66589
Hspa12a	0.0142279	0.128204	0.436	0.338	212.208
Kctd17	0.00159252	0.12792	0.419	0.285	24.8879
Sptssa	0.00202024	0.127851	0.584	0.438	31.4894
Nsg1	0.00145599	0.127539	0.965	0.936	22.7804
[truncated: 15,826 more rows]

## Sheet: VgatEsr1P50MvsP23M
	p_val	avg_logFC	pct.1	pct.2	p_val_adjust
[truncated: 15,923 more rows]
