# Supplementary material for: Esr1-dependent signaling and transcriptional maturation in the medial preoptic area of the hypothalamus shape the development of mating behavior during adolescence
Source: eLife. 2026 Jun 19;14:RP106347. doi: 10.7554/eLife.106347 (PMC13282117; doi:10.7554/eLife.106347)
Supplement: Supplementary file 6. [file elife-106347-supp6.xlsx]

## Sheet: female co-expression with HA-DE
TF	score
Esr1	1.21284
Egr2	1.21284
Pgr	1.21284
Ywhaz	1.21284
Zbtb20	1.21284
Rorb	1.21284
Creb3l1	1.21284
Peg3	1.21284
Onecut2	1.21284
Tead1	1.21284
Canx	1.21284
Rpl6	1.21284
Prnp	1.21284
Ets2	1.21284
Mafa	1.21284
Ywhae	1.21284
Maf	1.21284
Nr2f2	1.21284
Six3	1.21284
Myef2	1.21284
Id4	1.21284
Pou6f2	1.21284
Nr3c1	1.21284
Nfia	1.21284
Odc1	1.21284
Uqcrb	1.21284
Thra	1.21284
Klf10	1.21284
Lhx5	1.21284
Zeb2	1.21284
Zmat2	1.21284
Rab7	1.21284
Elk4	1.21284
Lin28b	1.21284
Zfp706	1.21284
Zfp37	1.21284
Nfix	1.21284
Lsm6	1.21284
Zmat4	1.21284
Cnot6	1.21284
P4hb	1.21284
Nucb1	1.21284
Tppp	1.21284
Zmiz1	1.21284
Mef2c	1.21284
Mbd4	1.21284
Las1l	1.21284
Zfp263	1.21284
Rpp25	1.21284
Zfp825	1.21284
Prkaa2	1.21284
Zfp637	1.21284
Foxo1	1.21284
Nuak1	1.21284
Dpf1	1.21284
Srebf1	1.21284
Hmg20a	1.21284
E2f3	1.21284
Hivep1	1.21284
Zfp94	1.21284
Ascl1	1.21284
Eif5a2	1.21284
Zfp536	1.21284
Zbtb26	1.21284
Zfhx3	0.611978
Hp1bp3	0.611978
Bhlhe41	0.611978
Pura	0.611978
Foxg1	0.611978
Gbx2	0.611978
Mapk1	0.611978
Nfil3	0.611978
Sox4	0.611978
Foxk1	0.611978
Ezr	0.611978
Celf6	0.611978
Luzp2	0.611978
Pds5a	0.611978
Zcchc17	0.611978
Zfp112	0.611978
Phf2	0.611978
Tef	0.611978
Smarca5	0.611978
Zfp592	0.611978
Sf3b1	0.611978
Nfkb1	0.611978
Trove2	0.611978
H2afz	0.611978
Hdac6	0.611978
Zfp575	0.611978
Zfp386	0.611978
Usf2	0.611978
Nr1d1	0.611978
Zbtb33	0.611978
Prdm16	0.611978
Zik1	0.611978
Zbtb4	0.611978
Zfp410	0.611978
Zbtb22	0.611978
Spdef	0.611978
Psmc2	0.611978
Hdx	0.611978
Insm1	0.611978
Zxdc	0.611978
Vps72	0.611978
Crebzf	0.611978
Spag7	0.611978
Zfp219	0.611978
Fbxl19	0.611978
Zfp653	0.611978
Zfp286	0.611978
Arx	0.543094
Tcf4	0.543094
Nap1l1	0.543094
Rab2a	0.543094
Celf5	0.543094
Cyb5r1	0.543094
Cbfb	0.543094
Snrnp70	0.543094
Stau2	0.543094
Zfp322a	0.543094
Nme1	0.543094
Zfp287	0.543094
Stat1	0.543094
Hirip3	0.543094
Lhx6	0.543094
Smarcc1	0.543094
Zbtb24	0.543094
Dusp26	0.543094
Zfp746	0.543094
Hivep2	0.543094
Nfyc	0.543094
Abl1	0.543094
Rfx5	0.543094
Npas4	0.543094
Sp1	0.543094
Hmbox1	0.543094
Xrcc4	0.543094
Gtf2a1	0.543094
Zxdb	0.543094
Zc3h7a	0.543094
Cebpz	0.543094
Zkscan3	0.543094
Zfp712	0.543094
Ash2l	0.543094
Zfp697	0.543094
Zfp27	0.543094
Atoh7	0.543094
Cxxc1	0.543094
Aff4	0.521449
Pou2f2	0.521449
Msi2	0.521449
Smug1	0.521449
Creb3	0.521449
Hnrnpc	0.521449
Zfp369	0.521449
Zic4	0.521449
Prdm4	0.521449
Tsn	0.521449
Zfp622	0.521449
Bax	0.521449
Nfib	0.521449
Kdm5b	0.521449
Xbp1	0.521449
Ckmt1	0.521449
Sft2d1	0.521449
Zfp326	0.521449
Rara	0.521449
Yeats4	0.521449
Utp18	0.521449
Suz12	0.521449
Pbx2	0.521449
Zfp281	0.521449
Gm14295	0.521449
Trim24	0.521449
Tsc22d4	0.521449
Sp2	0.521449
Rfx7	0.521449
Ruvbl1	0.521449
Zfp74	0.521449
Zfp551	0.521449
Nnt	0.521449
Scx	0.521449
Dmap1	0.521449
Dlx1	0.496639
Tmem33	0.496639
Npdc1	0.496639
Tceal6	0.496639
Magoh	0.496639
Smad7	0.496639
Zfp523	0.496639
Ncald	0.496639
Bptf	0.496639
Bad	0.496639
Rfxank	0.496639
Cenpb	0.496639
Nr2f1	0.496639
Aebp2	0.496639
Taf7	0.496639
Bach1	0.496639
Rbm42	0.496639
Ahctf1	0.496639
Zbtb2	0.496639
Mbnl2	0.496639
Ube2v1	0.496639
Sf1	0.496639
Sox12	0.496639
Zfp933	0.496639
Zfp9	0.496639
Mettl14	0.496639
Erf	0.496639
Zfp771	0.496639
Ubtf	0.496639
Pqbp1	0.496639
Lmo2	0.496639
Ccdc25	0.496639
Glis2	0.496639
Celf4	0.441443
Ssbp3	0.441443
Ran	0.441443
Pknox2	0.441443
Ewsr1	0.441443
Tsnax	0.441443
AU041133	0.441443
Rad21	0.441443
Ncor2	0.441443
Trmt1	0.441443
Srebf2	0.441443
Kif22	0.441443
Smad5	0.441443
Diablo	0.441443
Zfp639	0.441443
AI987944	0.441443
Suclg1	0.441443
Mylk	0.441443
Cpsf4	0.441443
Zfp282	0.441443
Tbp	0.441443
Tbpl1	0.441443
Nrf1	0.441443
Zbtb43	0.441443
Zfp654	0.441443
Gtf2f1	0.441443
Zfp143	0.441443
Pold2	0.441443
Mafk	0.441443
Churc1	0.415266
Pick1	0.415266
Pbx3	0.415266
Paxip1	0.415266
Arid5b	0.415266
Polr3a	0.415266
Rbbp5	0.415266
Mbd2	0.415266
Rfx3	0.415266
Elf1	0.415266
Zfp385a	0.415266
Lcor	0.415266
Ctcf	0.415266
Hmx3	0.415266
Zfp930	0.415266
Taf1a	0.415266
Zfp260	0.415266
Timm8a1	0.415266
Ep300	0.415266
Ecsit	0.415266
Dr1	0.415266
Zfp938	0.415266
Zfp334	0.415266
Gzf1	0.415266
Zkscan6	0.415266
Nfyb	0.415266
Lhx2	0.415266
Zswim1	0.415266
Zfp790	0.415266
Ar	0.380384
Cycs	0.380384
Mrpl1	0.380384
Zdhhc15	0.380384
Terf1	0.380384
Tceal3	0.380384
Atf2	0.380384
Gbx1	0.380384
Gabpa	0.380384
Bclaf1	0.380384
Cic	0.380384
Rnf138	0.380384
Psmd12	0.380384
Vps4b	0.380384
Rlf	0.380384
Gtpbp6	0.380384
Hivep3	0.380384
Yod1	0.380384
Gpank1	0.380384
Zbtb8b	0.380384
Etv5	0.380384
Bcl6	0.366283
Hnrnpa0	0.366283
Smap2	0.366283
Zfp687	0.366283
Rab14	0.366283
Snd1	0.366283
Zfp236	0.366283
Smad4	0.366283
Homez	0.366283
Mef2a	0.366283
Socs4	0.366283
Pck2	0.366283
Stat2	0.366283
Kdm4a	0.366283
Wrnip1	0.366283
Wdr83	0.366283
Dis3	0.366283
Purg	0.366283
Hdac2	0.362336
Dhx36	0.362336
Stat5a	0.362336
Zbtb6	0.362336
Scmh1	0.362336
Max	0.362336
Zfp362	0.362336
Rxra	0.362336
Ilf2	0.362336
Csnk2b	0.362336
Zfp62	0.362336
Smad2	0.362336
Crebl2	0.362336
Trim66	0.362336
Nfya	0.362336
Msra	0.362336
Adnp2	0.362336
Sp4	0.362336
Zfp3	0.362336
Zfp711	0.362336
Eef1d	0.360561
Nono	0.360561
Zfhx2	0.360561
Zfp867	0.360561
Tceal5	0.360561
Zfp408	0.360561
Phf8	0.360561
Nfatc2	0.360561
Foxn2	0.360561
Mdm2	0.360561
Dnajc21	0.360561
Zfp420	0.360561
Zfp566	0.360561
Nfatc3	0.360561
Phtf1	0.358361
Terf2	0.358361
Mxd1	0.358361
Hbp1	0.358361
Zfp451	0.358361
Zfp760	0.358361
Zfp628	0.358361
Nr2f6	0.358361
Zfp1	0.358361
Rfx1	0.358361
Rxrg	0.358361
Hsf4	0.358361
Tbl1xr1	0.358361
AW146154	0.358361
Kdm4c	0.358361
Rel	0.358361
Zfp770	0.358361
Zfp454	0.358361
Zfp39	0.358361
Ezh2	0.358361
Ikzf2	0.358264
Mef2d	0.358264
Tcf12	0.358264
Pou3f3	0.358264
Cfl2	0.358264
Zcchc14	0.358264
Zfp341	0.358264
Psma6	0.358264
Ube2k	0.358264
Clock	0.358264
E430018J23Rik	0.358264
Cbx7	0.358264
Pdcd11	0.358264
Rela	0.358264
E2f4	0.358264
2810403A07Rik	0.358264
Snapc5	0.358264
Zfp105	0.358264
Rxrb	0.358264
Zfp367	0.358264
Zfp384	0.358264
Zfp747	0.358264
Prox1	0.358264
Nr6a1	0.358264
Zbtb16	0.358264
Hmx2	0.32173
Foxj3	0.32173
Id2	0.32173
Zfp449	0.32173
Sema4a	0.32173
D3Ertd254e	0.32173
Hcfc1	0.32173
Aven	0.32173
Mynn	0.32173
Mnt	0.32173
Tcf3	0.32173
Nanos1	0.32173
Thap11	0.32173
Morn1	0.32173
Foxo4	0.32173
Zfp868	0.32173
Foxp2	0.310538
Bcl11b	0.310538
Fubp1	0.310538
Zbtb25	0.310538
Sox3	0.310538
Rbm7	0.310538
Zfp768	0.310538
Rps6ka5	0.310538
Hdac3	0.310538
Zfp248	0.310538
Yy1	0.310538
Mrpl2	0.310538
Gm6710	0.310538
Myb	0.310538
Rbbp9	0.310538
Arid3b	0.310538
Zfp276	0.310538
Mlxip	0.310538
Zfp111	0.310538
Zfp317	0.310538
Zfp672	0.310538
Zfp961	0.307672
Zscan18	0.307672
H2afy	0.307672
Pml	0.307672
Zfp146	0.307672
Prdx5	0.307672
Zfp207	0.307672
Sox6	0.307672
Timm44	0.307672
Kdm4b	0.307672
Sod1	0.307672
Zhx1	0.307672
Vamp3	0.307672
Zfp959	0.307672
Dbp	0.307672
2310011J03Rik	0.307672
Mtf1	0.307672
Zfp11	0.307672
Zfp114	0.307672
Lhx1	0.307672
Zfp963	0.307672
Rnf114	0.305139
Clk1	0.305139
Setbp1	0.305139
Zfp423	0.305139
Nr1h2	0.305139
Smarca1	0.305139
Hdac1	0.305139
Zfp280b	0.305139
Zfp664	0.305139
Meox2	0.305139
Zfp651	0.305139
Zfp2	0.305139
Satb1	0.294601
Tpi1	0.294601
Pou6f1	0.294601
Etfb	0.294601
Dazap1	0.294601
Hes5	0.294601
Zfp407	0.294601
Cebpb	0.294601
Irf3	0.294601
Zfp426	0.294601
Hinfp	0.294601
Meis2	0.294601
Nmral1	0.294601
Zkscan17	0.294601
Hsf1	0.289169
Ppp1r10	0.289169
Zfp780b	0.289169
Mypop	0.289169
Zfp445	0.289169
Six6	0.289169
Zfp251	0.289169
Mxi1	0.289169
Ikzf5	0.289169
Zkscan14	0.289169
Hey1	0.289169
Nup133	0.289169
Tob2	0.289169
Tcf7l2	0.289169
Hmgn3	0.285578
Pik3c3	0.285578
Ssrp1	0.285578
Hlcs	0.285578
Zfp532	0.285578
Hif1a	0.285578
Zdhhc24	0.285578
Ppp2r3d	0.285578
Zfp202	0.285578
Ppargc1a	0.285578
Rreb1	0.285578
Nup107	0.285578
Zfp583	0.285578
Taf1	0.285561
Zrsr1	0.285561
Dnmt1	0.285561
Sirt6	0.285561
Thrb	0.285561
Zeb1	0.285561
Zfp513	0.285561
Kdm2b	0.285561
Thap1	0.285561
Nkx6-2	0.285561
Zfp397	0.285561
Timeless	0.285561
Sp3	0.285561
Nr2c1	0.282925
Prkaa1	0.282925
Zkscan5	0.282925
Zscan29	0.282925
Foxj2	0.282925
Zfp182	0.282925
Hspa5	0.275465
Ctnnb1	0.275465
Mafg	0.275465
Zbtb5	0.275465
Sox10	0.275465
Zic1	0.273759
Sox5	0.273759
Smarcc2	0.273759
Arid3a	0.273759
Zfp560	0.273759
Zfp113	0.273759
Aggf1	0.273759
Arnt2	0.273759
Zbtb45	0.273759
Otud4	0.273759
Zfp180	0.273759
Carf	0.272332
Atf1	0.272332
Zfp64	0.272332
Olig2	0.272332
Smad9	0.272332
Snrpb2	0.265018
Zfp61	0.265018
Hnf1b	0.265018
Bhlhe40	0.260769
Ctbp1	0.260769
Deaf1	0.260769
Irf1	0.260769
Nkx2-1	0.260769
Bmyc	0.260769
Zfp787	0.260769
Jund	0.260769
Mlx	0.260769
Cux2	0.260769
Ing4	0.260769
Irf2	0.260769
Exosc3	0.254005
Mbd1	0.254005
Zfp46	0.254005
D130040H23Rik	0.254005
Apex1	0.254005
Nf1	0.254005
Sox1	0.254005
Zscan22	0.254005
Zfp516	0.251463
Rbm3	0.251463
Phf21a	0.251463
Atf6	0.251463
Nr1d2	0.251463
Zfp467	0.251463
Rbm22	0.251463
Hlf	0.24395
Fosl2	0.24395
Ccnt2	0.24395
Kcnip1	0.24395
Larp1	0.24395
Zfp612	0.24395
Zfp160	0.24395
Nr2c2	0.24395
Zfp335	0.24395
Rbm17	0.24395
Foxk2	0.24395
Pbx4	0.24395
Fiz1	0.24395
Hdac8	0.24395
Trim33	0.24395
Hmg20b	0.24395
Zfp597	0.24395
Cdk2ap1	0.24395
Chd2	0.239335
Prdm15	0.239335
Thoc2	0.239335
Gadd45a	0.239335
Zfp932	0.239335
Gar1	0.239335
Map4k2	0.239335
Rbak	0.239335
Meis3	0.236972
Klf7	0.236972
Zscan12	0.236972
Rbfox2	0.235477
Zic5	0.235477
Mga	0.235477
Cat	0.235477
Stub1	0.235477
Foxp4	0.235477
Ubp1	0.235477
Zfp553	0.235477
Smarca4	0.235477
Ddit3	0.235477
Larp4	0.235477
Klf13	0.235477
Pknox1	0.234686
Mex3c	0.234686
Setdb1	0.234686
Pou3f4	0.234686
Zfp661	0.234686
E2f5	0.234686
Got1	0.232454
Mios	0.232454
Cstf2	0.232454
Pole3	0.232454
Zfp444	0.232454
Zfp354c	0.232454
Dnmt3a	0.232454
Zfp442	0.232454
Zbtb11	0.232454
Etv1	0.232454
Brf1	0.232454
Tfam	0.230549
Gtf2a2	0.230549
Zfp189	0.230549
Prdm10	0.230549
Creb1	0.230549
Nxph3	0.230549
Polr3g	0.230549
Zfp775	0.230549
Gm14326	0.230549
Bdp1	0.224925
Zfp507	0.224925
Rfc3	0.224925
Snapc4	0.224925
Nr3c2	0.224925
Klf11	0.221637
Rab18	0.221637
Zfp266	0.221637
Zfp692	0.221637
Elk1	0.221637
Klf15	0.221637
Crem	0.221637
Klf16	0.221637
Zic3	0.221637
Trp53	0.220971
Olig1	0.220971
Klf12	0.220971
Git2	0.220282
Ncbp2	0.220282
Gtf3c2	0.220282
Zfp958	0.220282
Zbtb41	0.220282
Zfp131	0.219706
Dgcr8	0.219706
Foxn3	0.219706
Poli	0.219706
Zfp119b	0.219706
Mthfd1	0.219687
Junb	0.219687
Cbx3	0.219575
Gtpbp1	0.219575
Zfp668	0.214532
Patz1	0.214532
Fhl2	0.214532
Spats2	0.214532
Zfp358	0.214532
Nfat5	0.213676
Maz	0.213676
Dusp22	0.213676
Zbtb12	0.213676
Cbfa2t2	0.213676
Atf7	0.213676
Ctbp2	0.21345
H1fx	0.21345
Parp1	0.21345
Zfp580	0.21345
Zfp606	0.209872
Rarg	0.209872
Zbtb40	0.209382
Abcf2	0.208484
Cdc5l	0.208484
Zfp710	0.208484
Htatip2	0.208484
Dlx2	0.206659
Zfp949	0.206659
Ncor1	0.204259
Gtf2i	0.204259
Arnt	0.204259
Zfp93	0.204259
Zfp90	0.204259
Traf4	0.204259
Zfp937	0.202641
Zfp941	0.20166
Zfp28	0.20166
Grhpr	0.20166
Chd1	0.20166
6720489N17Rik	0.20166
Otx2	0.20166
Zfp235	0.20166
Ing3	0.20166
Dlx5	0.201026
Hmga1	0.200881
Bbx	0.200761
Zfp119a	0.200761
Zfp719	0.200083
Etv3	0.198763
Nr4a2	0.198206
Luzp1	0.198206
Zbtb48	0.196817
Rbms1	0.196817
Zfp275	0.196817
Mzf1	0.196817
Stat3	0.196817
Apex2	0.19611
Crtc2	0.19611
Rps4x	0.195113
Rps10	0.195113
Sox2	0.195113
Hnf4g	0.195113
Npas2	0.195113
Mecp2	0.195113
Ddx20	0.195113
Nfic	0.195113
Med30	0.195113
Nrl	0.195113
Hes6	0.192382
Sp9	0.192382
Atf5	0.192382
Zdhhc5	0.192382
Zfp931	0.190212
Zfp128	0.189627
Elf2	0.188639
Zfp641	0.188639
Trim28	0.188639
Ikzf4	0.188639
Srp9	0.185423
Zbtb37	0.185423
Cnot4	0.185423
Acaa1a	0.185423
Ugp2	0.185423
Cnot3	0.185423
Rcor1	0.185423
Zfp280d	0.185423
Xpa	0.185423
Zfp169	0.185423
Rbpj	0.185423
Zfp579	0.185423
Lhx8	0.183263
E2f6	0.183263
Epas1	0.182606
Prdm5	0.18214
Atf4	0.181471
Zfp781	0.181471
Zfp148	0.181471
Spr	0.181471
Tia1	0.180907
Zfp655	0.180907
Agap2	0.180907
Smad1	0.180907
Jun	0.180907
Zfp35	0.180907
Zscan20	0.180341
Srrm3	0.180341
Esrrg	0.180341
Zfp239	0.180341
Pou2f1	0.179366
Zbtb7a	0.178584
Rufy3	0.178584
Xrcc1	0.178584
R3hdm2	0.17808
Hmgb3	0.17808
Zfp623	0.17808
Zfp846	0.176372
Zfp319	0.176372
Zfp689	0.176372
Hcfc2	0.173511
Zbtb44	0.172386
Zfp821	0.169644
Msi1	0.166276
Dab2	0.165159
Kdm2a	0.164163
Cpeb1	0.164163
Gtf2h3	0.164163
Rnaseh2c	0.164163
Zfp41	0.161899
Banp	0.160573
Gtf3c5	0.159687
Zfp57	0.157006
Zfp629	0.155232
Hsf5	0.155146
Zfp667	0.155024
Gtf2ird1	0.155024
Zfp92	0.155024
Hnrnph3	0.155024
Pole4	0.155024
Smc3	0.155024
Aco1	0.155024
Zhx2	0.155024
Zbtb17	0.155024
BC005561	0.153691
1810024B03Rik	0.153691
Zfp574	0.15346
Mycn	0.151231
Zfp414	0.146259
Rb1	0.146259
Dlx6	0.146259
Mrps25	0.146219
E4f1	0.145601
Zfp652	0.144124
Zfp784	0.143429
Trps1	0.138935
Cd59a	0.138935
Arntl	0.138935
Sap30	0.138935
Zfp777	0.138284
Zfp30	0.136801
Gtf2b	0.130913
Rfxap	0.130913
Zfp329	0.127812
Atf6b	0.124248
Mta3	0.122904
Hsf2	0.12179
Isl1	0.12179
Pou3f2	0.12179
Sall2	0.12179
Pdlim5	0.12179
Grhl1	0.119578
Zfp213	0.116184
Ebf4	0.115904
Mettl3	0.115904
Hmgb1	0.114803
Rora	0.114803
Scrt1	0.114803
Zhx3	0.114803
Klf6	0.114803
Smarcb1	0.114803
Lrrfip1	0.111972
Sox8	0.109362
Tet1	0.107042
Foxo6	0.105617
Rarb	0.105184
Bach2	0.0957339
Zfp110	0.0940495
Zfp324	0.0940495
Zscan21	0.0934805
Rpl35	0.0909791
Sox11	0.0909791
Stat5b	0.0909791
Etv6	0.0909791
Brf2	0.0845871
Fos	0.0832905
Zfp800	0.0814741
Kat2a	0.0807488
Zfp354a	0.0807488
Zkscan16	0.0807488
Tfdp2	0.0807488
Zfp598	0.0755089
Zfp422	0.0738867
Tfdp1	0.0738867
Lcorl	0.0738867
Gmeb2	0.0738867
Zfp82	0.0738867
Mbtps2	0.0734791
Usf1	0.0679166
Plagl2	0.0677639
Sin3a	0.0674671
Dnttip1	0.067438
Zfp688	0.067438
Hltf	0.0646108
Kdm5a	0.0646108
Zfp91	0.064311
Zfp704	0.0617457
Ivd	0.0575379
Zfp212	0.0575379
Dus3l	0.0535055
Aspscr1	0.0532555
Zfp830	0.0521509
Foxp1	0.0513895
Zfp14	0.0496547
Gpd1	0.0479121
Sall1	0.0440891
Zbtb34	0.0433294
Esrra	0.043114
Arntl2	0.0428363
Rfc2	0.0424848
Vezf1	0.0422412
Zbtb1	0.0422412
Ascc1	0.0422412
Ubxn1	0.041979
Insm2	0.0404403
Usp39	0.0404403
Zfp740	0.0398536
Elk3	0.0398536
Gtf3a	0.0392125
Zfp120	0.0384398
Srf	0.0384398
Asap3	0.0384398
Zfp398	0.0380017
Pbx1	0.0367618
Zkscan1	0.0367618
Zfp316	0.0367469
Mybl1	0.0355526
Klf3	0.0339189
Zbtb49	0.0336508
Ahr	0.0335487
Zbtb46	0.0333498
Mxd4	0.0330691
Klf9	0.032257
Zbtb7c	0.0316907
Bcl11a	0.0314027
Topors	0.0311392
Creb3l2	0.0310858
Gabpb1	0.0306684
Klf4	0.0306684
Gm12166	0.0303323
Ppp5c	0.0287624
Zbtb38	0.0266989
Fez1	0.0248164
Klf5	0.0237441
Gmeb1	0.0237441
Foxo3	0.023643
Zfp866	0.0234862
Hic2	0.0218009
Arfgap1	0.019686
Zzz3	0.0194873
Cebpg	0.0190583
Cux1	0.0186674
Nfe2l1	0.0185738
U2af1	0.0183478
Fank1	0.0171714
Adarb1	0.017014
Plagl1	0.0166345
Zfx	0.0166069
Zfp646	0.0155628
Ptcd1	0.0147708
Prdm11	0.0144165
Sfpq	0.0143916
Zfp786	0.0127375
Zfp12	0.0118466
Ybx1	0.0111681
Jdp2	0.00892547

## Sheet: female co-expression with femal
TF	score
Esr1	0.475199
Rps4x	0.475199
Zic1	0.475199
Ywhaz	0.475199
Rpl6	0.475199
Mafa	0.475199
Canx	0.475199
Rpl35	0.475199
Lhx5	0.475199
Abcf2	0.475199
Hnrnpa0	0.475199
Larp1	0.475199
Clk1	0.475199
Stau2	0.475199
Nono	0.475199
Id2	0.475199
Sall1	0.475199
Smap2	0.475199
Ncald	0.475199
Crebl2	0.475199
Pou6f1	0.475199
Nucb1	0.475199
Csnk2b	0.475199
Cebpg	0.475199
Tfdp1	0.475199
Zfp933	0.475199
Tbp	0.475199
Maf	0.347918
Ikzf2	0.347918
Uqcrb	0.347918
Ran	0.347918
Zmat2	0.347918
Six6	0.347918
Hnrnpc	0.347918
Rorb	0.347918
Smarcc2	0.347918
Zfp397	0.347918
Zfp523	0.347918
Phf2	0.347918
Vps4b	0.347918
Tpi1	0.347918
Tob2	0.347918
Hsf2	0.347918
Kdm4b	0.347918
Zfp61	0.347918
Hdac6	0.347918
Spag7	0.347918
Mef2a	0.347918
Srrm3	0.347918
Zbtb16	0.347918
Thap11	0.347918
Vps72	0.347918
Tsc22d4	0.347918
Rxrg	0.347918
Bcl6	0.347918
Zfp653	0.347918
Snapc4	0.347918
Ing3	0.347918
Zbtb20	0.345595
Tead1	0.345595
Bcl11a	0.345595
Cycs	0.345595
Rora	0.345595
Aff4	0.345595
Tppp	0.345595
Srp9	0.345595
Celf6	0.345595
Hlcs	0.345595
Myef2	0.345595
Zfp275	0.345595
Gbx1	0.345595
Kdm2a	0.345595
Foxj2	0.345595
Ing4	0.345595
Trmt1	0.345595
Egr1	0.345595
Ebf4	0.345595
Ecsit	0.345595
Srf	0.345595
Nr2f6	0.345595
Gabpb1	0.345595
R3hdm2	0.345595
Foxn3	0.345595
Nr6a1	0.345595
Ascc1	0.345595
Pgr	0.321034
Arx	0.321034
Pura	0.321034
Dhx36	0.321034
Zcchc17	0.321034
Mapk1	0.321034
Creb3l1	0.321034
Tia1	0.321034
Taf1	0.321034
Stat1	0.321034
Zfp335	0.321034
Las1l	0.321034
Onecut2	0.321034
Zfp260	0.321034
Zhx1	0.321034
Acaa1a	0.321034
Taf7	0.321034
Nr2c2	0.321034
Nanos1	0.321034
Kat2a	0.321034
Dnmt3a	0.321034
Hbp1	0.321034
Zfp426	0.321034
Xrcc4	0.321034
Npas4	0.321034
Ywhae	0.319738
Bcl11b	0.319738
Hspa5	0.319738
Rab7	0.319738
Ikzf5	0.319738
Nr3c1	0.319738
Got1	0.319738
Dlx2	0.319738
Pou3f3	0.319738
Hes5	0.319738
Fubp1	0.319738
Ewsr1	0.319738
Hdac3	0.319738
Pds5a	0.319738
Mtf1	0.319738
Tef	0.319738
Gtpbp6	0.319738
Cpsf4	0.319738
Zfp930	0.319738
Bhlhe40	0.319738
Kif22	0.319738
Zbtb22	0.319738
Rbms1	0.319738
Rxra	0.319738
Rps10	0.285667
Zfp414	0.285667
Nfia	0.285667
Rab2a	0.285667
Ctbp1	0.285667
Dgcr8	0.285667
Hmx2	0.285667
Clock	0.285667
Satb1	0.285667
Sf3b1	0.285667
Chd2	0.285667
Zbtb24	0.285667
Zfp579	0.285667
Hdac1	0.285667
Zfp112	0.285667
Rara	0.285667
Elf1	0.285667
Fbxl19	0.285667
Aco1	0.285667
Rcor1	0.285667
Klf12	0.285667
Zfp93	0.285667
Zhx2	0.285667
Peg3	0.245102
Celf4	0.245102
Hmgb1	0.245102
Zfp553	0.245102
Cstf2	0.245102
Prdm15	0.245102
Smarcc1	0.245102
Topors	0.245102
Irf2	0.245102
Mef2d	0.245102
Zfp672	0.245102
Hivep1	0.245102
2810403A07Rik	0.245102
Zfp775	0.245102
Nfic	0.245102
Elk4	0.245102
Erf	0.245102
Gm12166	0.245102
Nap1l1	0.228254
Magoh	0.228254
Rufy3	0.228254
Tsn	0.228254
Zscan18	0.228254
Cfl2	0.228254
Rbbp5	0.228254
Zbtb46	0.228254
Hmgn3	0.228254
Ppp1r10	0.228254
Zfp771	0.228254
Hes6	0.228254
Cbx7	0.228254
Htatip2	0.228254
Jun	0.228254
Rfxank	0.228254
Zfp369	0.228254
Pqbp1	0.228254
Nr2f1	0.228254
6720489N17Rik	0.228254
Ccnt2	0.222601
Klf15	0.222601
Tmem33	0.222601
Ckmt1	0.222601
Kcnip1	0.222601
Rfx1	0.222601
Zfp746	0.222601
Map4k2	0.222601
Rarb	0.222601
Nfat5	0.222601
Cxxc1	0.222601
Zfp560	0.222601
Ccdc25	0.222601
Rfc2	0.222601
Zfp408	0.222601
Rbpj	0.222601
Sox12	0.222601
Nfkb1	0.222601
Sox1	0.222601
Gm14295	0.222601
Rarg	0.222601
Zfp324	0.222601
Zscan22	0.222601
Thrb	0.222601
Homez	0.222601
Hp1bp3	0.222125
Npdc1	0.222125
Tbpl1	0.222125
Snrnp70	0.222125
Vezf1	0.222125
Bad	0.222125
Zbtb37	0.222125
Wdr83	0.222125
Ybx1	0.222125
Rela	0.222125
Zfp639	0.222125
Git2	0.222125
Pou6f2	0.222125
Plagl2	0.222125
AW146154	0.222125
Hic2	0.222125
Prdm10	0.222125
Zkscan5	0.222125
Dlx1	0.203415
Celf5	0.203415
Id4	0.203415
Tcf4	0.203415
Mecp2	0.203415
Prdx5	0.203415
Sin3a	0.203415
Sf1	0.203415
Fank1	0.203415
Ptcd1	0.203415
Banp	0.203415
Klf9	0.203415
Zfp128	0.203415
Zkscan14	0.203415
Eef1d	0.19957
Dusp26	0.19957
Zfp667	0.19957
Ube2k	0.19957
Bclaf1	0.19957
Zfp326	0.19957
Zcchc14	0.19957
Trim24	0.19957
Rfx3	0.19957
Suclg1	0.19957
Zfp770	0.19957
Thap1	0.19957
Zfp148	0.19957
Meox2	0.19957
Hsf1	0.19957
Mxi1	0.19957
Zfp551	0.19957
Atoh7	0.19957
Six3	0.192708
Ar	0.192708
Sox5	0.192708
Foxg1	0.192708
Zic4	0.192708
Zbtb7a	0.192708
Foxp1	0.192708
Mbtps2	0.192708
Klf7	0.192708
Zbtb11	0.192708
Zfp580	0.192708
E430018J23Rik	0.192708
Zdhhc15	0.192708
Tcf12	0.18173
Nrl	0.18173
Zfp14	0.18173
Hmg20a	0.18173
Maz	0.18173
Zfp740	0.18173
Sall2	0.18173
Gtf2a1	0.18173
Fhl2	0.18173
Aspscr1	0.18173
Zfp120	0.18173
Yod1	0.18173
Trp53	0.18173
Gm14326	0.18173
Tcf3	0.18173
Cic	0.18173
Pbx3	0.18173
Egr2	0.180409
H2afz	0.180409
Bptf	0.180409
Pole4	0.180409
Sox3	0.180409
Tfam	0.180409
Ppargc1a	0.180409
Zfp322a	0.180409
Mxd4	0.180409
Zfp263	0.180409
Zfp597	0.180409
Zfp111	0.180409
Zfp276	0.180409
Insm2	0.180409
Zfp362	0.180409
Gpd1	0.180409
Zfp688	0.180409
Hlf	0.171237
Zfp354c	0.171237
Zfp160	0.171237
Dazap1	0.171237
Mga	0.171237
Jund	0.171237
Socs4	0.171237
Msra	0.171237
Zrsr1	0.171237
Mbd4	0.171237
Zfp280d	0.171237
Usf2	0.171237
Hirip3	0.171237
Aven	0.171237
Lcorl	0.171237
Plagl1	0.171237
Ets2	0.170575
Pbx1	0.170575
Zfp706	0.170575
Tceal3	0.170575
Atf2	0.170575
Cnot3	0.170575
Snd1	0.170575
Hnrnph3	0.170575
Klf10	0.170575
Zik1	0.170575
Zfp938	0.170575
Zfp786	0.170575
Zdhhc24	0.170575
Pou2f2	0.170115
Pou2f1	0.170115
Smarca5	0.170115
Lsm6	0.170115
Rpp25	0.170115
Gtf2a2	0.170115
Foxj3	0.170115
Usf1	0.170115
Sema4a	0.170115
Zbtb44	0.170115
Zkscan3	0.170115
Zfp11	0.170115
Fiz1	0.170115
Sp1	0.170115
Sox4	0.161448
Nrf1	0.161448
Terf2	0.161448
Eif5a2	0.161448
Zfp46	0.161448
Smad1	0.161448
Timm44	0.161448
Foxk2	0.161448
Zfp931	0.161448
Zfp239	0.161448
Xpa	0.161448
Bach2	0.161448
Zfp287	0.159585
Nr2f2	0.159585
Pick1	0.159585
Ddit3	0.159585
Etv6	0.159585
Paxip1	0.159585
Hdac2	0.159585
H2afy	0.159585
Zfp1	0.159585
Zfp958	0.159585
Zfp131	0.159585
Zfp937	0.159585
Gtf2ird1	0.155539
Rbak	0.155539
Nkx6-2	0.155539
Zbtb2	0.155539
Dpf1	0.155539
Mettl3	0.155539
Zfp467	0.155539
Elf2	0.155539
Zfp825	0.155539
Zfp513	0.155539
Prdm11	0.155539
Ssbp3	0.146944
Zfp664	0.146944
Rfx5	0.146944
Gtf3c2	0.146944
Zfp266	0.146944
Nfya	0.146944
Gpank1	0.146944
Npas2	0.146944
Zkscan6	0.146944
Creb3l2	0.146944
Zfhx3	0.146545
Foxn2	0.146545
Glis2	0.146545
Gtf3a	0.146545
Mxd1	0.146545
Purg	0.146545
Lrrfip1	0.146545
Gzf1	0.146545
Ddx20	0.146545
Crebzf	0.146545
Wrnip1	0.146545
Dis3	0.146545
Larp4	0.146545
Tceal6	0.145715
Pdcd11	0.145715
Luzp1	0.145715
Gar1	0.145715
Myb	0.145715
Foxp2	0.145715
Zbtb40	0.145715
Hnf1b	0.145715
H1fx	0.141041
Hltf	0.141041
Pbx4	0.141041
Fos	0.141041
Prox1	0.141041
Traf4	0.141041
Elk3	0.141041
Polr3g	0.141041
Zfp207	0.14098
Hcfc1	0.14098
Smad2	0.14098
Gtf2b	0.14098
Vamp3	0.14098
Bdp1	0.14098
Dnmt1	0.14098
Zfp202	0.14098
Zfp622	0.140752
Max	0.140752
Meis3	0.140752
Zfp821	0.140752
Zfp598	0.140752
Ugp2	0.140752
Zfp454	0.140752
Zfp182	0.140752
Zfp57	0.140752
Zic5	0.139385
Nme1	0.139385
Atf6b	0.139385
Zfp286	0.139385
Zxdb	0.139385
Sp9	0.139385
Hmbox1	0.139385
Xrcc1	0.139385
Zfp652	0.139385
Zbtb12	0.139385
Zbtb41	0.138336
Crem	0.138336
Rbm7	0.138336
Setdb1	0.138336
Zfp316	0.138336
Ep300	0.138336
Zzz3	0.138336
Irf3	0.138336
Arnt	0.138336
Churc1	0.134649
Snapc5	0.134649
Zfp516	0.134649
Rbbp9	0.134649
E2f6	0.134649
Setbp1	0.134649
Hmx3	0.133924
Foxp4	0.133924
Dus3l	0.133924
Zfp846	0.133924
Aebp2	0.133924
Dlx5	0.133924
Mrps25	0.133924
Hivep2	0.133924
Zfp637	0.13329
Nf1	0.13329
Esrrg	0.13329
Zfp13	0.13329
Med30	0.13329
Trim66	0.13329
Zfp704	0.13329
Stat3	0.13329
Olig1	0.13329
Smarca1	0.131682
Bach1	0.131682
Psmd12	0.131682
Zbtb5	0.131682
Ssrp1	0.131682
Zfp655	0.131682
Gmeb2	0.131682
Nfib	0.130337
Zfp612	0.130337
Zfp941	0.130337
Sp4	0.130337
Scx	0.129709
Zfp641	0.129709
Agap2	0.129709
Zfp451	0.129709
Otud4	0.129709
Zfx	0.129709
Hivep3	0.129709
Lmo2	0.129709
Hmga1	0.129709
Zfp28	0.129709
Timm8a1	0.128964
Klf16	0.128964
Zfp91	0.128964
Rb1	0.128964
Scrt1	0.128964
Mzf1	0.128964
Zfp236	0.128964
Nfix	0.127552
Cnot4	0.127552
Smad7	0.127552
Cpeb1	0.127552
Pml	0.127552
Zfp760	0.127552
Ruvbl1	0.126352
Rad21	0.126352
Rab14	0.126352
Dbp	0.126352
Adarb1	0.126352
Klf6	0.126352
Etv1	0.126352
Pck2	0.126352
Zfp2	0.126352
Gmeb1	0.126352
Sox11	0.125727
Mdm2	0.125727
Mthfd1	0.125727
Arntl2	0.125727
Prkaa2	0.125727
Zfp90	0.125727
Zfp780b	0.125727
Dnttip1	0.125727
Zfp92	0.119611
Zbtb26	0.119611
Zfp647	0.119611
Spdef	0.119611
Zbtb48	0.119611
Zfp319	0.119611
Cdk2ap1	0.119609
Zswim1	0.119609
Xbp1	0.119486
Zfp9	0.119486
Zfp963	0.119486
Klf3	0.119486
Etv3	0.119486
Atf5	0.119486
Sp3	0.119486
Rnaseh2c	0.116417
Nfe2l1	0.116417
Klf11	0.116417
Msi1	0.116417
Zscan29	0.116417
Zfp317	0.116417
Mbd2	0.116417
Gtf2i	0.114819
Nkx2-1	0.114819
Srebf2	0.114819
Carf	0.114819
Trim28	0.114819
Psmc2	0.114819
Sft2d1	0.114771
Mios	0.114771
Dnajc21	0.114771
Nr1d1	0.114771
Zfp507	0.114771
Mef2c	0.114462
Mafg	0.114462
Utp18	0.114462
Hsf4	0.114462
Snrpb2	0.110592
E4f1	0.110592
Zfp521	0.110592
Ezr	0.110522
Rbm42	0.110522
Ikzf4	0.110522
Pik3c3	0.110522
Bhlhe41	0.109163
Rps6ka5	0.109163
Zfp248	0.109163
Foxo6	0.109163
Hmgb3	0.108507
Zfp445	0.107958
Ilf2	0.107958
Zbtb45	0.107958
Deaf1	0.107958
Pknox2	0.107958
Stat5a	0.107958
Zfp12	0.107958
Mlxip	0.107958
Chd1	0.107774
Nup133	0.107774
AI987944	0.107152
Zfp574	0.107152
Ppp2r3d	0.107152
Exosc3	0.10703
D130040H23Rik	0.10703
Foxk1	0.106746
Etfb	0.106746
Nup107	0.106746
Bbx	0.106746
Zfp623	0.106746
Gadd45a	0.106746
Zfp651	0.106648
Esrra	0.10618
Rnf114	0.10618
Pbx2	0.10618
Cenpb	0.105288
Tceal5	0.104769
Cux2	0.104769
Zfp583	0.104769
Gabpa	0.104769
Terf1	0.104533
Zfp407	0.104533
Nmral1	0.104406
Zfp341	0.104406
Mafk	0.104406
Polr3a	0.103996
Zfp449	0.103996
Ncbp2	0.103996
Zfp781	0.103996
Mettl14	0.103996
Brf1	0.103996
Zdhhc5	0.103907
Zscan21	0.103656
Kdm4c	0.103656
Trim33	0.103656
Zfp27	0.103656
Mylk	0.103656
Creb3	0.103509
D3Ertd254e	0.103509
Zfp113	0.103509
Lhx2	0.103509
Mex3c	0.101519
Mbnl2	0.101514
Ppp5c	0.101514
Zfp442	0.101514
Zc3h7a	0.101514
Mynn	0.101514
Zfp180	0.101399
Rfx7	0.101399
Kdm2b	0.101399
Zkscan1	0.101399
Mrpl2	0.101166
Lhx1	0.101166
Yeats4	0.101166
Diablo	0.100731
Stat2	0.100731
Prdm5	0.100731
Ezh2	0.100731
Zfp444	0.100288
Zfp334	0.0999779
Smad4	0.0999779
Zfp800	0.0999779
Nnt	0.0999779
Smug1	0.0999779
Gm6710	0.0999779
Nxph3	0.0999779
Stat5b	0.0997718
Zfp654	0.0991745
Zfhx2	0.0991745
Zfp398	0.0991745
Nr1d2	0.0991745
Zfp668	0.0991745
Ctbp2	0.0991745
Srebf1	0.0991745
Ncor2	0.0970216
Tbl1xr1	0.0970216
Cebpb	0.0970216
Zfp697	0.096464
Patz1	0.096464
Zfp524	0.096464
Klf8	0.096464
Zfp961	0.0955513
Rfc3	0.0955513
Zmat4	0.0945266
Zhx3	0.0945266
Irf1	0.0943891
Sirt6	0.0943891
Cbx3	0.0928433
Nfyb	0.0928433
Phf8	0.0921681
Arntl	0.0921681
Zfp868	0.0915693
Hif1a	0.0907824
Zfp592	0.0907715
Zbtb33	0.0907715
Dusp22	0.0907715
Zmiz1	0.0904466
Kdm5b	0.0904466
Brf2	0.0904466
Zfp959	0.0904466
Zfp606	0.0904466
Zfp146	0.0899244
Zfp219	0.0896123
Zfp105	0.0896123
Sox8	0.0896123
Zfp213	0.0894189
Cyb5r1	0.0893733
Zfp719	0.0893733
Zscan20	0.0893733
Zfp646	0.0893733
Zfp82	0.0868914
Cd59a	0.086325
Dmap1	0.0859114
Pole3	0.0858813
Zfp575	0.0853368
Zfp385a	0.0853368
Dr1	0.0853368
Zeb1	0.0852533
Zfp280b	0.0852533
Lcor	0.0852533
Zscan12	0.0838523
Prkaa1	0.0823235
Insm1	0.0816571
Zbtb17	0.0810061
Mnt	0.080855
Mypop	0.080855
Isl1	0.0804642
Stub1	0.0804642
Zfp94	0.0804642
Rab18	0.0804642
Zfp410	0.0804642
Scmh1	0.0804642
Elk1	0.0804642
Smarca4	0.078434
Zfp189	0.0777165
Arid5b	0.0777165
Zfp169	0.0777165
Zfp532	0.0770814
Rreb1	0.0770814
Lhx6	0.0769127
Zfp119b	0.0765106
Sox13	0.0722618
Phtf1	0.069928
Zfp329	0.069928
Gtf2f1	0.069928
Grhl1	0.069928
Zfp536	0.069928
Abl1	0.0695505
E2f4	0.0695505
Ctcf	0.069334
Rbm3	0.0676334
Ubxn1	0.0676334
Tsnax	0.0676334
Rbfox2	0.0674775
Rlf	0.0674775
Zfp3	0.0670255
Zfp251	0.0645271
Zfp422	0.06435
Arfgap1	0.0638814
Zfp37	0.0631226
P4hb	0.0631226
Nuak1	0.0628016
Rxrb	0.0628016
Nfyc	0.0625536
Msi2	0.0625263
Etv5	0.0625263
AU041133	0.0586073
Mrpl1	0.0586073
Zfp932	0.0586073
Mycn	0.0586073
Aggf1	0.0581691
Tet1	0.0581359
U2af1	0.0556505
Kdm5a	0.0556505
Rbm17	0.0556505
Hdac8	0.0556505
Cbfb	0.0555317
Sox2	0.0551244
Klf5	0.0550045
Zfp41	0.0550045
Ahctf1	0.0548963
Zfp423	0.0526988
Zfp777	0.0518472
Meis2	0.0517127
Ncor1	0.0517105
Luzp2	0.0517105
Klf13	0.0517105
Zkscan16	0.0514957
Zfp386	0.0513473
Ash2l	0.0500087
Odc1	0.0495172
Arid3b	0.0495172
Prdm16	0.0495172
Sap30	0.0495172
Ubtf	0.048555
Zeb2	0.0436195
Nr2c1	0.0436195
Nr4a2	0.0436195
Fosl2	0.0412301
Ubp1	0.0400303
Atf7	0.0399389
Prnp	0.0399365
Zbtb43	0.0399365
Hinfp	0.0399365
Bax	0.0374065
Bmyc	0.0360692
Zbtb25	0.0359901
Zbtb6	0.0356522
Cat	0.0356522
Zfp867	0.0356522
Hdx	0.0356522
Zfp787	0.0348243
Nr1h2	0.0348243
Atf4	0.0346337
Usp39	0.0344292
Hey1	0.0342231
Cebpz	0.0337003
E2f5	0.0335792
Tfdp2	0.0331614
Foxo1	0.0331614
Foxo3	0.0331614
Pou3f2	0.0319427
Yy1	0.0316337
Sod1	0.031503
Pdlim5	0.031503
Taf1a	0.0314865
Rnf138	0.0314865
Spr	0.0314865
Trps1	0.0314688
Dlx6	0.0312678
Zfp30	0.0312678
Zfp281	0.0312561
Ctnnb1	0.0308906
Thoc2	0.0308906
Fez1	0.0307668
Ascl1	0.0307668
Rbm22	0.0306548
E2f3	0.029737
Nfatc3	0.0286918
Ivd	0.0284161
Prdm4	0.0282803
Lin28b	0.0282803
Lhx8	0.0275511
Cbfa2t2	0.0275511
Zfp39	0.0273374
Smad5	0.0261741
Cnot6	0.0254234
Phf21a	0.0249311
Zfp384	0.0245985
Zfp768	0.023789
Cdc5l	0.0235875
Zfp212	0.0235663
Atf1	0.0235413
Zbtb7c	0.0234324
Zfp119a	0.0233845
Crtc2	0.022988
Zfp64	0.0229432
Zbtb38	0.0222567
Zfp710	0.0221849
Ahr	0.0221515
Nfil3	0.0220506
Sfpq	0.0212947
BC005561	0.020941
Trove2	0.0206867
Creb1	0.0206867
Apex2	0.0201446
Zfp74	0.0200726
Zfp282	0.0199438
Gtf2h3	0.0199438
Zfp629	0.0192639
Thra	0.0192344
Zfp689	0.0188772
Hnf4g	0.0177871
Hmg20b	0.0177871
Zbtb4	0.0177391
Mbd1	0.0173293
Zfp692	0.0170554
Zfp235	0.0170448
Smarcb1	0.0164362
Zfp711	0.0157413
Cux1	0.0157094
Grhpr	0.0153557
Zfp687	0.0147674
Zxdc	0.0142494
Arnt2	0.0138077
2310011J03Rik	0.0125437
Nfatc2	0.0121521
Psma6	0.0118613
Spats2	0.0118613
Hcfc2	0.0118261
Zfp866	0.0117707
Zfp949	0.0115081
Smc3	0.0114526
Arid3a	0.0109696
Zfp830	0.0108605
Zfp747	0.0106032
Timeless	0.0102917
Rfxap	0.00925779
Sox6	0.00924505
Jdp2	0.00853677
Apex1	0.00813671
Pknox1	0.00811996
Zic3	0.007766
Zfp354a	0.00739785
Sp2	0.00719901
Suz12	0.00719661
Mlx	0.00709271
Zfp114	0.00666031
Zfp62	0.00613589
Sox10	0.00601852
Zfp628	0.00569574

## Sheet: male co-expression with HA-DEGs
TF	score
Esr1	0.616568
Ywhaz	0.616568
Rorb	0.616568
Ar	0.616568
Zbtb20	0.616568
Zic1	0.616568
Rpl35	0.616568
Rps10	0.616568
Mapk1	0.616568
Pou6f2	0.616568
BC005561	0.616568
Rab2a	0.616568
Snrnp70	0.616568
Insm2	0.616568
Lhx5	0.616568
Celf6	0.616568
Stub1	0.616568
Atf2	0.616568
Zfp169	0.616568
Arx	0.616568
Jund	0.616568
Nfix	0.616568
Ybx1	0.616568
Zfp354c	0.616568
Sp2	0.616568
Eef1d	0.616568
Snapc4	0.616568
Mbd1	0.616568
Zfp710	0.616568
Carf	0.616568
Zfp236	0.616568
Asap3	0.616568
Stat2	0.616568
Abcf2	0.616568
Peg3	0.567183
Prox1	0.567183
Id4	0.567183
Isl1	0.567183
Rab7	0.567183
Tcf4	0.567183
Clk1	0.567183
Nfib	0.567183
Nfe2l1	0.567183
Tppp	0.567183
Sox2	0.567183
Satb1	0.567183
Pbx3	0.567183
Tceal3	0.567183
Tsn	0.567183
Dnmt3a	0.567183
Tsnax	0.567183
Atf4	0.567183
Zmiz1	0.567183
Arntl2	0.567183
Zbtb40	0.567183
Hdx	0.567183
Sf1	0.567183
Pqbp1	0.567183
Zfp661	0.567183
Dnttip1	0.567183
Ash2l	0.567183
Zfp641	0.567183
Zswim1	0.567183
Glis2	0.567183
Zfp938	0.567183
Rfxank	0.567183
Taf1a	0.567183
Gtf2b	0.567183
Bach1	0.567183
Rpl6	0.514808
Ets2	0.514808
Zfhx3	0.514808
Npdc1	0.514808
Srebf2	0.514808
Dusp26	0.514808
Zfp771	0.514808
Celf5	0.514808
Zfp13	0.514808
Lsm6	0.514808
Pck2	0.514808
Trove2	0.514808
Zfp414	0.514808
Mecp2	0.514808
Dnajc21	0.514808
Srrm3	0.514808
Rbfox2	0.514808
Bbx	0.514808
Zfp329	0.514808
Pknox2	0.514808
Tef	0.514808
Zfp746	0.514808
Zfp449	0.514808
Cux1	0.514808
Dlx5	0.514808
Zfp180	0.514808
Zfp286	0.514808
Atf7	0.514808
Gabpa	0.514808
Terf1	0.514808
Pik3c3	0.514808
Zfp651	0.514808
Zbtb43	0.514808
Thap11	0.514808
Rbm22	0.514808
Canx	0.512379
Mef2c	0.512379
Aff4	0.512379
Kcnip1	0.512379
Zeb2	0.512379
Zfp612	0.512379
Hmx2	0.512379
Zfp266	0.512379
Cycs	0.512379
Mef2d	0.512379
Mga	0.512379
Bmyc	0.512379
Id2	0.512379
Thoc2	0.512379
Scmh1	0.512379
Ctbp2	0.512379
Trps1	0.512379
R3hdm2	0.512379
Zfp868	0.512379
Gtf2a2	0.512379
Rxrb	0.512379
Zfp664	0.512379
Aebp2	0.512379
Sema4a	0.512379
Gtpbp6	0.512379
Zfp248	0.512379
Zkscan1	0.512379
Cdk2ap1	0.512379
Vezf1	0.512379
Ikzf4	0.512379
Mbtps2	0.512379
Gmeb1	0.512379
Kif22	0.512379
Ep300	0.512379
Elk4	0.512379
Hbp1	0.512379
Zfp57	0.512379
Msi1	0.512379
Zfp770	0.512379
Tet1	0.512379
Pir	0.512379
Prdm16	0.512379
Etv5	0.512379
Rps4x	0.461221
Ywhae	0.461221
Dlx1	0.461221
Zfp706	0.461221
Celf4	0.461221
H2afy	0.461221
Elk1	0.461221
Zbtb7a	0.461221
Myef2	0.461221
Ezr	0.461221
Msi2	0.461221
Zfp207	0.461221
Psmd12	0.461221
Cfl2	0.461221
Msra	0.461221
Zfp326	0.461221
Mbd2	0.461221
Ing4	0.461221
Cnot3	0.461221
Zfp324	0.461221
Agap2	0.461221
Bad	0.461221
Zfp281	0.461221
Zfp46	0.461221
Zfp647	0.461221
Zfp2	0.461221
Zfp551	0.461221
Smad9	0.461221
Rpp25	0.461221
Ccnt2	0.456845
Prnp	0.456845
Dlx2	0.456845
Zeb1	0.456845
Srp9	0.456845
Klf5	0.456845
Grhpr	0.456845
Hmg20a	0.456845
Zfp941	0.456845
Lrrfip1	0.456845
Prdx5	0.456845
Ckmt1	0.456845
Nf1	0.456845
Sod1	0.456845
Zbtb7c	0.456845
Thap1	0.456845
Zfp128	0.456845
Tfdp2	0.456845
Junb	0.456845
Foxj2	0.456845
Mynn	0.456845
Zfp146	0.456845
Zfp442	0.456845
Cxxc1	0.456845
Ahr	0.456845
Prdm4	0.456845
Rfxap	0.456845
Mdm2	0.456845
Zfp932	0.456845
Zfp949	0.456845
Ubtf	0.456845
Gtf2f1	0.456845
Zbtb22	0.456845
Prdm12	0.456845
Bcl11b	0.431856
Nap1l1	0.431856
Smarcc2	0.431856
Cbx3	0.431856
Hnrnpa0	0.431856
Mrps25	0.431856
Zfp112	0.431856
Zmat4	0.431856
Gpd1	0.431856
Zfp846	0.431856
Sft2d1	0.431856
Zfp263	0.431856
Xbp1	0.431856
Clock	0.431856
Zfp119a	0.431856
Zfp451	0.431856
Zbtb12	0.431856
Mlx	0.431856
Zxdb	0.431856
Smad1	0.431856
Ppard	0.431856
Zfp719	0.431856
Atf1	0.431856
Rbpj	0.431856
Plagl1	0.431856
Jdp2	0.431856
Zbtb45	0.431856
Sox4	0.427588
Foxp2	0.427588
Ssbp3	0.427588
Rbm42	0.427588
Klf7	0.427588
Nono	0.427588
Rufy3	0.427588
Smarca5	0.427588
Smad5	0.427588
Dgcr8	0.427588
Srf	0.427588
U2af1	0.427588
Zfp260	0.427588
Rfx7	0.427588
Zbtb41	0.427588
Gm14295	0.427588
Scrt1	0.427588
Zfp740	0.427588
Atoh7	0.427588
Nr2c2	0.427588
Hmga1	0.427588
Rnaseh2c	0.427588
Tead1	0.427588
Rfx1	0.427588
Zfp182	0.427588
Olig1	0.427588
E2f6	0.427588
Hivep3	0.427588
Zbtb49	0.427588
Zbtb37	0.427588
Nup107	0.427588
Polr3g	0.427588
Tpi1	0.426976
Hp1bp3	0.426976
Sall1	0.426976
Nuak1	0.426976
Gbx2	0.426976
Hspa5	0.426976
Creb3l1	0.426976
Nucb1	0.426976
Myb	0.426976
Bhlhe41	0.426976
P4hb	0.426976
Luzp2	0.426976
Pbx4	0.426976
Zfhx2	0.426976
Hdac1	0.426976
Rbms1	0.426976
Cnot6	0.426976
Wdr83	0.426976
Zfp697	0.426976
Npas2	0.426976
Kdm4c	0.426976
Zfp964	0.426976
Prdm15	0.426976
Rfc3	0.426976
Foxk1	0.426976
Zfp930	0.426976
Lmo2	0.426976
Six3	0.409288
Hmgb1	0.409288
Zmat2	0.409288
Ctnnb1	0.409288
Stau2	0.409288
Pbx1	0.409288
Sall2	0.409288
Cnot4	0.409288
Ctbp1	0.409288
Sox9	0.409288
Nr2f1	0.409288
Ncor1	0.409288
Rfc2	0.409288
Hsf4	0.409288
Zfp646	0.409288
Setdb1	0.409288
Cbfb	0.409288
Hdac8	0.409288
Zc3h7a	0.409288
Smad7	0.409288
Acaa1a	0.409288
Rbm17	0.409288
Crebzf	0.409288
Zfp74	0.409288
Htatip2	0.409288
Magoh	0.409288
Pou6f1	0.409288
Eif5a2	0.409288
Barx2	0.409288
Zfp566	0.409288
Sox11	0.383823
Hnrnpc	0.383823
Yod1	0.383823
Foxj3	0.383823
Ascc1	0.383823
Larp4	0.383823
Adarb1	0.383823
Zfp780b	0.383823
Rfx3	0.383823
Rlf	0.383823
Zfp30	0.383823
Dbp	0.383823
Zbtb11	0.383823
Zfp280b	0.383823
Hes6	0.383823
Smug1	0.383823
Rps6ka5	0.383823
Mrpl1	0.383823
Pick1	0.383823
Zfp408	0.383823
Zxdc	0.383823
Pou2f1	0.383823
Zfp219	0.383823
Zfp628	0.383823
Pold2	0.383823
Esrra	0.383823
Zfp316	0.383823
Arid3b	0.383823
Zfp111	0.383823
Larp1	0.342562
Rora	0.342562
Arnt	0.342562
Zfp821	0.342562
Zrsr1	0.342562
Zfp445	0.342562
Arfgap1	0.342562
Ncbp2	0.342562
Zfp553	0.342562
Nkx2-1	0.342562
Hif1a	0.342562
Mnt	0.342562
Klf15	0.342562
Kdm2b	0.342562
Lin28b	0.342562
Zbtb26	0.342562
Ptcd1	0.342562
Hcfc2	0.342562
Sp1	0.342562
Zfp105	0.342562
Pura	0.330289
Got1	0.330289
Zcchc17	0.330289
Lhx8	0.330289
Pou3f2	0.330289
Cstf2	0.330289
Deaf1	0.330289
Nfyc	0.330289
Bax	0.330289
Foxp1	0.330289
Sox1	0.330289
Snrpb2	0.330289
Foxn2	0.330289
Zfp1	0.330289
Stat5b	0.330289
Setbp1	0.330289
Hdac3	0.330289
Zfp786	0.330289
Mbd4	0.330289
Zfp362	0.330289
Zfp110	0.330289
Nanos1	0.329526
Ran	0.329526
Odc1	0.329526
Zfp598	0.329526
Nme1	0.329526
Hdac6	0.329526
Rbm7	0.329526
Gadd45a	0.329526
Nfat5	0.329526
Arnt2	0.329526
Luzp1	0.329526
Xpa	0.329526
D3Ertd254e	0.329526
Zfp358	0.329526
Tmem33	0.329526
Mettl3	0.329526
Zfp120	0.329526
Phf8	0.329526
Ssrp1	0.329526
Prdm10	0.329526
Sox12	0.329526
Ikzf2	0.321092
Onecut2	0.321092
Atf6b	0.321092
Atf5	0.321092
Sfpq	0.321092
Map4k2	0.321092
Vps4b	0.321092
Rnf114	0.321092
Kdm2a	0.321092
Zfp521	0.321092
Cd59a	0.321092
Gtf2ird1	0.321092
Hmgb3	0.321092
Dr1	0.321092
Gtf3a	0.321092
Zbtb8b	0.321092
Zfp667	0.321092
Rarb	0.321092
Gm6710	0.321092
Nfya	0.321092
Ing3	0.321092
Zfp62	0.321092
Stat1	0.321092
Zbtb4	0.320909
Ilf2	0.320909
Zhx3	0.320909
Dhx36	0.320909
Zfp707	0.320909
Npas4	0.320909
Tfam	0.320909
Pml	0.320909
Zfp280d	0.320909
Foxk2	0.320909
Zscan18	0.320909
Psma6	0.320909
Smc3	0.320909
Kat2a	0.320909
Cdc5l	0.320909
Chd1	0.320909
Trp53	0.320909
Nr4a2	0.320909
Zbtb44	0.320909
Dpf1	0.320909
Sin3a	0.320909
Exosc3	0.320909
Prdm5	0.320909
Dus3l	0.315911
Foxg1	0.315911
Churc1	0.315911
Snd1	0.315911
Banp	0.315911
Rad21	0.315911
Zfp61	0.315911
Ppp1r10	0.315911
Usf1	0.315911
E2f5	0.315911
Zfp583	0.315911
Arid3a	0.315911
Zfp423	0.315911
E2f4	0.315911
Tcf3	0.315911
Zfp3	0.315911
Zkscan17	0.315911
Aco1	0.315911
Nr6a1	0.315911
Ncald	0.311568
Zfp275	0.311568
Ddit3	0.311568
Mafg	0.311568
Zfp560	0.311568
Nr1d2	0.311568
Hinfp	0.311568
Zfp655	0.311568
Gtf2a1	0.311568
Yeats4	0.311568
Zfp592	0.311568
D130040H23Rik	0.311568
Zfp800	0.311568
Tob2	0.311568
Plagl2	0.311568
Zbtb16	0.305843
Phf21a	0.305843
Zkscan14	0.305843
Dusp22	0.305843
Jun	0.305843
Ivd	0.305843
Klf13	0.305843
Mettl14	0.305843
Hirip3	0.305843
Dlx6	0.305843
Ecsit	0.305843
Foxr2	0.305843
Xrcc4	0.305843
Apex2	0.305843
Nr1h2	0.305843
Crebl2	0.298907
Fez1	0.298907
Sox5	0.298907
Rara	0.298907
Maz	0.298907
Zfp407	0.298907
Zbtb38	0.298907
Cyb5r1	0.298907
Zhx1	0.298907
Zfp523	0.298907
Hsf1	0.298907
Etfb	0.298907
Hmbox1	0.298907
Mycn	0.298907
Gtf2h3	0.298907
Hnf1b	0.298399
Gzf1	0.298399
Foxo1	0.298399
Hes5	0.298399
Phf2	0.298399
E2f3	0.298399
Timm8a1	0.298399
Cat	0.298399
Zfp319	0.298399
Zbtb17	0.298399
Zfp64	0.298399
9130019O22Rik	0.298399
Spr	0.298399
Zfp961	0.298399
Klf8	0.298399
Egr1	0.298399
Zfp575	0.298399
Pou3f3	0.295415
Timm44	0.295415
Ewsr1	0.295415
Trim66	0.295415
Phtf1	0.295415
Zfp830	0.295415
Psmc2	0.295415
Ikzf5	0.295415
Spdef	0.295415
Zfp524	0.295415
Klf12	0.295415
Hmgn3	0.292685
Zic5	0.292685
Csnk2b	0.292685
Trmt1	0.292685
Smarcc1	0.292685
Meis1	0.292685
Gar1	0.292685
Topors	0.292685
Ugp2	0.292685
Six6	0.292685
Zfp597	0.292685
Mthfd1	0.292685
Zfp444	0.292685
Atf6	0.292685
Zfp580	0.292685
Prkaa2	0.292685
Zbtb1	0.292685
Erf	0.292685
Rcor1	0.292685
Sf3b1	0.275018
Hcfc1	0.275018
Maf	0.275018
Gtf3c5	0.275018
Pds5a	0.275018
Klf6	0.275018
Bhlhe40	0.275018
Crtc2	0.275018
Zfp467	0.275018
Nrf1	0.275018
Rbbp5	0.275018
Spag7	0.275018
Zfp654	0.275018
Zfp422	0.275018
Zfp28	0.275018
Nr2f6	0.275018
Parp1	0.270889
Zfp639	0.270889
Zfp687	0.270889
Irf3	0.270889
Zkscan3	0.270889
Cux2	0.270889
Trim24	0.270889
Nmral1	0.270889
AI987944	0.270889
Mlxip	0.270889
Zfp37	0.270889
Sirt6	0.270889
Cenpb	0.270889
Zic3	0.270889
Hic2	0.270889
AW146154	0.270889
Nnt	0.270889
Ppargc1a	0.254613
Ube2k	0.254613
Snapc5	0.254613
Lhx1	0.254613
Wrnip1	0.254613
Bach2	0.254613
Zscan21	0.254613
Gbx1	0.254613
Lhx2	0.254613
Rreb1	0.254613
Zfp369	0.254613
Zfp367	0.254613
Zfp623	0.254613
Gtf2i	0.249224
Foxn3	0.249224
Trim33	0.249224
Dazap1	0.249224
Zfp9	0.249224
Zfp251	0.249224
Zfp12	0.249224
Klf4	0.249224
Zkscan4	0.249224
Tfdp1	0.249224
Mbnl2	0.248103
Bptf	0.248103
Elk3	0.248103
Mypop	0.248103
Zfp148	0.248103
Grhl1	0.248103
Zfp91	0.248103
Hivep1	0.248103
Sp4	0.248103
Insm1	0.248103
Adnp2	0.248103
Pgr	0.247688
Tia1	0.247688
Pou2f2	0.247688
Lcorl	0.247688
Creb1	0.247688
Chd2	0.247688
Zfp397	0.247688
Tbp	0.247688
Hlcs	0.247688
Thra	0.24556
Rab14	0.24556
Zic4	0.24556
Bcl11a	0.24556
Taf1	0.24556
Hdac2	0.24556
Zfp931	0.24556
Mxd1	0.24556
9130023H24Rik	0.24556
Mtf1	0.24556
Zfp622	0.236092
Hnrnph3	0.236092
Suz12	0.236092
Zfp334	0.236092
Zbtb34	0.236092
Rela	0.236092
Zfp536	0.236092
Gabpb1	0.235753
Tsc22d4	0.235753
Zfp14	0.235753
Cebpz	0.235753
Mex3c	0.235753
Zfp119b	0.235753
Zfp606	0.235753
Zfp787	0.235753
Med30	0.235753
Zfp691	0.235753
Zfp791	0.235753
Kdm5a	0.230236
Zfp637	0.230236
Ppp5c	0.230236
Zfp287	0.230236
Zbtb33	0.230236
Polr3a	0.230236
Smarcb1	0.230236
Zfp317	0.230236
Cbx7	0.230236
Brf2	0.230236
Nfkb1	0.229172
Smarca1	0.229172
Zdhhc15	0.229172
Pole3	0.229172
Zfp711	0.229172
Dnmt1	0.229172
Irf2	0.229172
Dmap1	0.229172
Gtpbp1	0.229172
Zfp113	0.226967
Tceal6	0.226967
Zfp131	0.226967
Zfp777	0.226967
Taf7	0.226967
Esrrg	0.226967
Zfp689	0.226967
Utp18	0.226967
Lhx6	0.223789
Hltf	0.223789
Gpank1	0.223789
Ctcf	0.223789
Brf1	0.223789
Etv3	0.223789
Vps72	0.223789
Prdm11	0.220445
Zfp213	0.220445
Foxp4	0.220445
Zfp866	0.220445
Zcchc14	0.218778
Zkscan6	0.218778
Sp3	0.218778
Mafk	0.218778
Zfp933	0.218778
Hey1	0.218778
Rbm3	0.218477
Bclaf1	0.218477
Smap2	0.218477
Bdp1	0.218477
Nfic	0.218477
Ncor2	0.218477
Kdm4b	0.218477
E430018J23Rik	0.218477
Ubxn1	0.218477
Zfp235	0.218477
Suclg1	0.216243
Zfp704	0.216243
Zfp322a	0.216243
Tcf12	0.216243
Tbl1xr1	0.216243
Zfp239	0.216243
Mxd4	0.216243
Scx	0.216243
Zfp11	0.216243
Pknox1	0.216243
Zik1	0.216243
Dis3	0.216243
1810024B03Rik	0.216243
Kdm5b	0.215602
Vamp3	0.215602
Zfp41	0.215602
Zfp937	0.215602
Mrpl2	0.215602
Pou3f4	0.215602
Zfp503	0.215602
Zbtb24	0.215602
Zzz3	0.215207
Zfp420	0.215207
Xrcc1	0.215207
H1fx	0.215207
Pou3f1	0.215207
Zfp354a	0.215207
Traf4	0.215207
Klf11	0.215207
Zfp35	0.215207
Zfp454	0.215207
Zfp90	0.208185
Fiz1	0.208185
Zfp385a	0.208185
Zfp579	0.208185
Gtf3c2	0.206541
Klf9	0.206541
Prkaa1	0.206541
Ubp1	0.206541
Zbtb39	0.206541
Max	0.205767
Cpeb1	0.205767
Mios	0.205767
Zfp143	0.205767
Zfp93	0.202312
2310011J03Rik	0.202312
Las1l	0.201663
Zfp94	0.201663
Sox3	0.201663
Zscan22	0.201663
Spats2	0.201352
Fosl2	0.201352
Zfp784	0.201352
Zfp426	0.200489
Git2	0.200489
Rbbp9	0.200489
Otud4	0.200489
Zfp386	0.200489
Etv6	0.200489
Nuak2	0.200489
Cic	0.200396
Zfp335	0.200396
Nfia	0.199193
Rab18	0.199193
Kdm5d	0.199193
Pole4	0.199193
Usf2	0.199193
Aspscr1	0.199193
Ddx20	0.199193
Hsf2	0.199193
Paxip1	0.199193
Creb3	0.199193
2810403A07Rik	0.199193
Zfp775	0.199193
Meis2	0.198055
Ebf4	0.198055
Zfp276	0.196699
Rxra	0.196699
Zhx2	0.196699
Fos	0.196033
Zfp629	0.192509
Gm14326	0.188886
Rb1	0.188886
Sp8	0.188886
Zfp507	0.188886
Mzf1	0.180601
Ppp2r3d	0.180601
Zfp747	0.180601
Homez	0.178849
Zfp532	0.178299
Terf2	0.178299
Nfatc3	0.178299
Zbtb5	0.178299
Zfp212	0.178299
Meis3	0.177136
Srebf1	0.176789
Zbtb6	0.176001
Klf10	0.175608
Zfp688	0.175608
Nup133	0.174682
Zfp692	0.174682
Elf2	0.174682
Foxo3	0.169086
Zfp963	0.168627
Mef2a	0.168607
Dmrtb1	0.168607
Lcor	0.168546
Zbtb46	0.168433
Apex1	0.16718
Zfp867	0.165273
Tceal5	0.159205
Zfp652	0.159205
AU041133	0.159205
Gmeb2	0.148049
Thrb	0.146122
Hivep2	0.144786
Zfp354b	0.144786
Zscan20	0.144215
Ccdc25	0.144215
Dab2	0.134994
Ruvbl1	0.1332
Rbak	0.130938
Irf9	0.130027
Nr3c1	0.123701
Foxo6	0.123671
Purg	0.123671
Rfx5	0.123671
Nfatc2	0.123587
Rxrg	0.117019
Pdcd11	0.117019
Mxi1	0.117019
Zfp92	0.114359
Etv1	0.110307
Zfp668	0.110307
Fank1	0.107653
Zfp672	0.102176
Zfp825	0.0946335
Zfp653	0.0910708
Hlf	0.0851156
Cbfa2t2	0.0839608
H2afz	0.0826806
Arid5b	0.0826806
Abl1	0.0826806
Sox6	0.0826806
Zbtb48	0.0826806
Diablo	0.0826806
Uqcrb	0.0777376
Arntl	0.0728342
Pbx2	0.0728342
Sap30	0.072618
Zdhhc5	0.0688691
Cebpg	0.0688691
Tbpl1	0.0505228
Zfp160	0.0505228
Zfp513	0.0501871
Bcl6	0.0501871
Patz1	0.0501871
Nr1d1	0.0446001
Kdm4a	0.0426094
Hmg20b	0.0426094
Nr2f2	0.0410851
Fubp1	0.0410851
Zfp282	0.039874
Yy1	0.0374903
Trim28	0.0369559
Ahctf1	0.0366129
Myc	0.0348556
Hsf5	0.033725
Hmx3	0.0309077
Smarca4	0.02998
Aggf1	0.02998
Zfp398	0.0254136
Stat3	0.0245888
Smad2	0.0238528
Fbxl19	0.0238528
Rnf138	0.0227014
E4f1	0.0207254
Zfx	0.0194088
Zfp410	0.0176549
Smad4	0.0172877
Nr3c2	0.0165771
Nfyb	0.0111589
Cpsf4	0.00981306

## Sheet: male co-expression with male di
TF	score
Esr1	1.02061
Foxp2	1.02061
Gbx2	1.02061
Id4	1.02061
Canx	1.02061
Dlx1	1.02061
Ccnt2	1.02061
Nr2f2	1.02061
Hp1bp3	1.02061
Nr4a2	1.02061
Pgr	1.02061
Tppp	1.02061
Celf4	1.02061
Rab2a	1.02061
Bptf	1.02061
Suz12	1.02061
Lhx8	1.02061
Zfp445	1.02061
Nme1	1.02061
Elk1	1.02061
Ezr	1.02061
Smarca4	1.02061
Sf3b1	1.02061
Pbx3	1.02061
Mbtps2	1.02061
Tef	1.02061
Zfp90	1.02061
Tsnax	1.02061
Zfp958	1.02061
Zbtb45	1.02061
Cstf2	1.02061
Zfp275	1.02061
Sf1	1.02061
Ilf2	1.02061
Zfp949	1.02061
Mecp2	1.02061
Tceal3	1.02061
Mettl3	1.02061
Smad5	1.02061
Trim28	1.02061
E2f5	1.02061
Gtf2a1	1.02061
Hes6	1.02061
Bcl6	1.02061
Sap30	1.02061
Zbtb25	1.02061
Rpl6	0.969283
Rps4x	0.969283
Prox1	0.969283
Satb1	0.969283
Tpi1	0.969283
Zic1	0.969283
Rab7	0.969283
Pou2f2	0.969283
Hnrnpa0	0.969283
Ctnnb1	0.969283
Rbm3	0.969283
Sox6	0.969283
Kcnip1	0.969283
H2afz	0.969283
Zfp13	0.969283
Pbx4	0.969283
Sox12	0.969283
Bcl11a	0.969283
Sox4	0.969283
Hnrnph3	0.969283
Dhx36	0.969283
Ybx1	0.969283
Klf9	0.969283
Srrm3	0.969283
Zfp322a	0.969283
Zfp938	0.969283
Grhpr	0.969283
Dlx2	0.969283
Rps6ka5	0.969283
Lcorl	0.969283
Fiz1	0.969283
Cnot3	0.969283
Phf2	0.969283
Aebp2	0.969283
D3Ertd254e	0.969283
Smad1	0.969283
Pou6f2	0.969283
Ssrp1	0.969283
Terf2	0.969283
Maf	0.969283
Dlx6	0.969283
Xpa	0.969283
Ascc1	0.969283
Zfp444	0.969283
Prdm5	0.969283
Nr1h2	0.969283
Zfp354a	0.969283
Ruvbl1	0.969283
Zfp579	0.969283
Tbp	0.969283
Rel	0.969283
Ywhaz	0.949084
Rps10	0.949084
Peg3	0.949084
Mapk1	0.949084
Pou3f3	0.949084
Ran	0.949084
Zfhx3	0.949084
Hsf2	0.949084
Prnp	0.949084
Aff4	0.949084
Ets2	0.949084
Cycs	0.949084
Ncor1	0.949084
Las1l	0.949084
Arx	0.949084
Zic5	0.949084
Rfx3	0.949084
Hdac3	0.949084
Mypop	0.949084
Meis3	0.949084
Tfdp2	0.949084
Zfp148	0.949084
Hinfp	0.949084
Lrrfip1	0.949084
Cic	0.949084
Zfp592	0.949084
Arid5b	0.949084
Dgcr8	0.949084
Creb1	0.949084
Stat3	0.949084
Zfp574	0.949084
Bad	0.949084
Zfp260	0.949084
Mafg	0.949084
Zfp61	0.949084
Zfp941	0.949084
Sall2	0.949084
Pou2f1	0.949084
Zbtb33	0.949084
Dpf1	0.949084
Stat2	0.949084
Hey1	0.949084
Hif1a	0.949084
Zbtb41	0.949084
Zfp94	0.949084
Hcfc2	0.949084
Zfp937	0.949084
Srbd1	0.949084
Zscan22	0.949084
Zbtb20	0.838118
Nap1l1	0.838118
Zeb2	0.838118
Sp8	0.838118
Zic3	0.838118
Foxo1	0.838118
Zcchc17	0.838118
Rpp25	0.838118
Mrps25	0.838118
Mettl14	0.838118
Celf6	0.838118
R3hdm2	0.838118
Psmc2	0.838118
Stub1	0.838118
Sp2	0.838118
Klf13	0.838118
Mthfd1	0.838118
Zfp612	0.838118
Dus3l	0.838118
Zbtb38	0.838118
Lhx5	0.838118
Map4k2	0.838118
Zfp335	0.838118
Uqcrb	0.838118
Bax	0.838118
Gtf3c2	0.838118
Zfp770	0.838118
Nr2f1	0.838118
Sema4a	0.838118
Snd1	0.838118
Tmem33	0.838118
Med30	0.838118
Hic2	0.838118
Nf1	0.838118
Max	0.838118
Zfp787	0.838118
Dazap1	0.838118
Scrt1	0.838118
Luzp2	0.838118
Cpeb1	0.838118
Pml	0.838118
Hivep2	0.838118
Rlf	0.838118
Zfp454	0.838118
Prdm4	0.838118
Ing3	0.838118
Thrb	0.838118
Zfp111	0.838118
Rpl35	0.787789
Ywhae	0.787789
Bcl11b	0.787789
Six3	0.787789
Snrnp70	0.787789
Nfe2l1	0.787789
Ncald	0.787789
Insm2	0.787789
Zbtb7a	0.787789
Smap2	0.787789
Hmgn3	0.787789
Dr1	0.787789
Nono	0.787789
Gtf2i	0.787789
Zdhhc15	0.787789
Zfp207	0.787789
Crebl2	0.787789
Cdk2ap1	0.787789
Zbtb12	0.787789
Smarcc1	0.787789
Zfp263	0.787789
Smarca1	0.787789
Zfp868	0.787789
H1fx	0.787789
Zfp961	0.787789
Rbm17	0.787789
Zfp687	0.787789
Zfp180	0.787789
Smarcb1	0.787789
Yod1	0.787789
Zbtb37	0.787789
Zfp647	0.787789
Zswim1	0.787789
Zfp317	0.787789
Foxr2	0.787789
Zfp386	0.787789
Nr4a1	0.787789
Creb3l2	0.787789
Tia1	0.763505
BC005561	0.763505
Gbx1	0.763505
Luzp1	0.763505
Zfp706	0.763505
Zmat2	0.763505
Tcf7l2	0.763505
Ssbp3	0.763505
Nucb1	0.763505
Tcf12	0.763505
Zic4	0.763505
Zfp112	0.763505
Cbfa2t2	0.763505
Esrra	0.763505
Msi2	0.763505
Churc1	0.763505
Kdm5d	0.763505
Zfp30	0.763505
Sod1	0.763505
Smad4	0.763505
Smarca5	0.763505
Nrf1	0.763505
Zfp120	0.763505
Nfia	0.763505
Zfp654	0.763505
9130023H24Rik	0.763505
Rnf138	0.763505
Tfdp1	0.763505
Srf	0.763505
Cpsf4	0.763505
Tceal6	0.763505
E2f4	0.763505
Zfp639	0.763505
Mafk	0.763505
Zfp92	0.763505
Gabpb1	0.763505
Zfp414	0.763505
Zkscan17	0.763505
Dnttip1	0.763505
Zfp248	0.763505
Rfxap	0.763505
Foxp4	0.763505
Nmral1	0.763505
Tcf3	0.763505
Rxra	0.763505
Rorb	0.710047
Ar	0.710047
Npdc1	0.710047
Lsm6	0.710047
Rab18	0.710047
Tead1	0.710047
Zfp266	0.710047
Scmh1	0.710047
Ing4	0.710047
Xbp1	0.710047
Trove2	0.710047
Zkscan5	0.710047
Hnrnpc	0.710047
Hsf1	0.710047
Ubxn1	0.710047
Hdac6	0.710047
Zbtb48	0.710047
Foxp1	0.710047
Msra	0.710047
Parp1	0.710047
Adarb1	0.710047
Yeats4	0.710047
Chd1	0.710047
Zfp358	0.710047
Mbd1	0.710047
Kdm4a	0.710047
Sp4	0.710047
Zbtb49	0.710047
Rfc3	0.710047
Zkscan6	0.710047
Utp18	0.710047
Abl1	0.710047
Arid3b	0.710047
Pir	0.710047
Mbnl2	0.590739
Irf3	0.590739
Rufy3	0.590739
Rnaseh2c	0.590739
Cnot4	0.590739
Odc1	0.590739
Deaf1	0.590739
Rbbp5	0.590739
Nuak2	0.590739
Zmiz1	0.590739
Hmx3	0.590739
Pole4	0.590739
Zfp867	0.590739
Zfp760	0.590739
Id2	0.590739
Foxj3	0.590739
Arfgap1	0.590739
Cnot6	0.590739
Ecsit	0.590739
Mlxip	0.590739
Mzf1	0.590739
Zfp652	0.590739
Zfp1	0.590739
Foxj2	0.590739
Zfp119a	0.590739
Spats2	0.590739
Rbms1	0.590739
Zfp655	0.590739
Abcf2	0.590739
Zfp964	0.590739
Brf1	0.590739
Klf8	0.590739
Pknox1	0.590739
Zkscan16	0.590739
Zfp367	0.590739
Dmrtb1	0.590739
Adnp2	0.590739
Zfp777	0.590739
Zbtb5	0.590739
Zbtb34	0.552109
Hlf	0.552109
Prdx5	0.552109
Rbm7	0.552109
Npas4	0.552109
Phf8	0.552109
Hmg20a	0.552109
Grhl1	0.552109
Zcchc14	0.552109
Ctcf	0.552109
Asap3	0.552109
Zfp553	0.552109
Hltf	0.552109
Klf5	0.552109
Zfp664	0.552109
Zfp932	0.552109
Zfp423	0.552109
Rfx1	0.552109
Zfp866	0.552109
Zfp422	0.552109
Zfp324	0.552109
Purg	0.552109
Zfp575	0.552109
Bdp1	0.552109
Atf6b	0.552109
Mrpl1	0.552109
Zfp41	0.552109
Nfya	0.552109
Lhx6	0.531338
Zeb1	0.531338
Tbl1xr1	0.531338
Zfp536	0.531338
Dusp26	0.531338
Usf2	0.531338
Cd59a	0.531338
Ncbp2	0.531338
Snapc4	0.531338
Dnajc21	0.531338
Dis3	0.531338
Rxrg	0.531338
Rnf114	0.531338
Carf	0.531338
Nfic	0.531338
Kdm5b	0.531338
Prdm12	0.531338
Bbx	0.531338
Cebpz	0.531338
E2f3	0.531338
Sox3	0.531338
Nfyc	0.531338
Zfp963	0.531338
Rbpj	0.531338
Zfp219	0.531338
Elk4	0.531338
Gtf2b	0.531338
Lhx2	0.531338
Ppargc1a	0.524747
Pbx1	0.524747
Rbfox2	0.524747
Psma6	0.524747
Hlcs	0.524747
Dusp22	0.524747
Cebpg	0.524747
Csnk2b	0.524747
Pou3f1	0.524747
Usf1	0.524747
Ash2l	0.524747
Nfyb	0.524747
Nr3c2	0.524747
Taf1a	0.524747
Klf11	0.524747
Smad2	0.524747
Glis2	0.524747
Zfp64	0.524747
Zfp202	0.524747
Myc	0.524747
Zmat4	0.51803
Tsn	0.51803
Rab14	0.51803
Chd2	0.51803
2810403A07Rik	0.51803
Fubp1	0.51803
Terf1	0.51803
Myb	0.51803
Atf5	0.51803
Gtf3c5	0.51803
Gtpbp6	0.51803
Zfp160	0.51803
Hbp1	0.51803
Zfp825	0.51803
Zfp131	0.51803
Ppp1r10	0.51803
Topors	0.51803
Brf2	0.51803
Zfp653	0.51803
Pou3f4	0.51803
Kdm4b	0.51803
Olig1	0.51803
Zfp800	0.51803
Morn1	0.51803
Meis2	0.51803
Gmeb2	0.51803
Ikzf4	0.51803
Ezh2	0.51803
Zfp516	0.51803
Klf15	0.51803
Zscan12	0.51803
Cux1	0.473539
Kdm2b	0.473539
Rarg	0.473539
Zfp91	0.473539
Zfp212	0.473539
Klf3	0.473539
Gadd45a	0.473539
Zkscan14	0.473539
Pknox2	0.473539
Zfp628	0.473539
Aggf1	0.473539
Kdm2a	0.473539
Smug1	0.473539
Mtf1	0.473539
Gpank1	0.473539
Ikzf5	0.473539
Zfp110	0.473539
Etfb	0.473539
Lcor	0.473539
Zfp661	0.473539
Arnt	0.470602
Fos	0.470602
Mnt	0.470602
Foxk1	0.470602
Zfp74	0.470602
Zfp280b	0.470602
Cyb5r1	0.470602
Zfp62	0.470602
AI987944	0.470602
Zfp28	0.470602
Timm8a1	0.470602
Zfp667	0.470602
Klf4	0.470602
Polr3a	0.470602
Rreb1	0.470602
Zxdc	0.470602
Zfp341	0.470602
Diablo	0.470602
Zfp551	0.470602
Zfp39	0.470602
Lhx1	0.470602
Zbtb2	0.470602
Zfp329	0.462104
P4hb	0.462104
Bclaf1	0.462104
Gtf2a2	0.462104
Zfp821	0.462104
Tsc22d4	0.462104
Zfp532	0.462104
Mga	0.462104
Magoh	0.462104
Arid3a	0.462104
Eef1d	0.462104
Nfat5	0.462104
Mlx	0.462104
Mbd2	0.462104
Zfp334	0.462104
Zfp931	0.462104
Zfp846	0.461771
Atf4	0.461771
Atf2	0.461771
Kif22	0.461771
Foxn3	0.461771
Xrcc1	0.461771
Zfp280d	0.461771
Snrpb2	0.461771
Egr1	0.461771
Zfp113	0.461771
Zfp213	0.461771
Klf16	0.461771
Kdm5a	0.461771
Zfp598	0.461771
Spdef	0.461771
Kat2a	0.461771
Mxd1	0.461771
Pick1	0.461771
Zbtb8b	0.461771
Barx2	0.461771
E430018J23Rik	0.461771
Zbtb7c	0.461771
Zfp959	0.461771
Cbx3	0.459666
Pura	0.459666
Nfib	0.459666
Atoh7	0.459666
Hmgb3	0.459666
Foxg1	0.459666
Zfp354c	0.459666
Ugp2	0.459666
Trim33	0.459666
Zfp420	0.459666
Mycn	0.459666
Bach1	0.459666
Zfp398	0.456393
Irf2	0.456393
Apex1	0.456393
Klf7	0.456393
Gabpa	0.456393
Zfp467	0.456393
Nr2c2	0.456393
D130040H23Rik	0.456393
Rarb	0.456393
Gtf2ird1	0.456393
Zkscan3	0.456393
Wrnip1	0.456393
Trim24	0.456393
Setdb1	0.456393
Cxxc1	0.456393
Zfp182	0.456393
Zfp646	0.456393
Fhl2	0.456393
Exosc3	0.456393
Arntl2	0.456393
Zfp689	0.456393
Srebf2	0.45383
Gpd1	0.45383
Klf12	0.45383
Zfp426	0.45383
Vps4b	0.45383
Ccdc25	0.45383
Git2	0.45383
Zfp369	0.45383
Nuak1	0.45383
Zfp354b	0.45383
Usp39	0.45383
Zfp316	0.45383
Zfp410	0.45383
Aco1	0.45383
Sin3a	0.45383
Zfp513	0.45383
Pou6f1	0.45383
Ppp2r3d	0.45383
Zfp143	0.45383
Zfp384	0.45383
Zfp697	0.45383
Zfp276	0.45383
Zbtb22	0.45383
Rb1	0.45383
Mios	0.435098
Zfp385a	0.435098
Ubtf	0.435098
Zrsr1	0.435098
Trmt1	0.435098
Zbtb40	0.435098
Rfxank	0.435098
Sox2	0.435098
Zfp407	0.435098
Sirt6	0.435098
Eif5a2	0.435098
Kdm4c	0.435098
Zfp14	0.435098
Fbxl19	0.435098
Phtf1	0.435098
Gm14326	0.435098
Etv1	0.435098
Rbak	0.435098
Paxip1	0.435098
Zfp105	0.435098
Fank1	0.435098
Sox11	0.432304
Mbd4	0.432304
Zfp566	0.432304
Rbbp9	0.432304
Banp	0.432304
Zfp449	0.432304
Zfp57	0.432304
Zfp281	0.432304
Zfp688	0.432304
Zhx3	0.432304
Tfam	0.432304
Ncor2	0.432304
Crtc2	0.432304
Sp9	0.432304
Zscan18	0.432304
Cat	0.432304
Dnmt1	0.432304
Gmeb1	0.432304
Zfp11	0.432304
Ddx20	0.432304
Isl1	0.403062
Tcf4	0.403062
Larp1	0.403062
Thoc2	0.403062
Snapc5	0.403062
Ctbp1	0.403062
Hsf4	0.403062
Nr3c1	0.403062
Zfp397	0.403062
Elf2	0.403062
Mef2a	0.403062
Sox1	0.403062
Zhx1	0.403062
Hnf1b	0.403062
Etv3	0.403062
Foxo3	0.403062
Zfp442	0.403062
Acaa1a	0.403062
Zfp235	0.403062
Rcor1	0.399125
Zfp239	0.399125
Yy1	0.399125
Poli	0.399125
Otud4	0.399125
E4f1	0.399125
Prdm11	0.381613
Atf6	0.381613
Zfp704	0.381613
Ep300	0.381613
Zbtb26	0.381613
Zfp710	0.381613
Zdhhc5	0.381613
Zfp933	0.381613
Cdc5l	0.381613
Zfp507	0.381613
Hmbox1	0.381613
Zbtb1	0.381613
Plagl1	0.381613
Pik3c3	0.381613
Nfix	0.378392
Rad21	0.378392
U2af1	0.378392
Ahr	0.378392
Taf1	0.378392
Aspscr1	0.378392
Scx	0.378392
Etv6	0.378392
Dab2	0.378392
Hmg20b	0.378392
Smad9	0.378392
Arntl	0.358974
Zfp286	0.358974
Zfp692	0.358974
Jun	0.358974
Foxk2	0.358974
Klf6	0.358974
Dbp	0.358974
Zfp606	0.358974
E2f6	0.358974
Lin28b	0.358974
Irf9	0.358974
Homez	0.358974
Thap11	0.358974
Zfp641	0.354416
Zfp524	0.354416
Creb3l1	0.354416
Hcfc1	0.354416
Zbtb44	0.354416
Gtf2h3	0.354416
Zfp629	0.354416
Etv5	0.354416
Timm44	0.350002
Pds5a	0.350002
Zfp740	0.350002
Zfp637	0.350002
Mex3c	0.350002
Zfp747	0.338164
Zfp184	0.338164
Hirip3	0.338164
Zfp622	0.338164
Nanos1	0.338164
Nkx2-1	0.338164
Zzz3	0.338164
AU041133	0.338164
Nfil3	0.338164
Suclg1	0.335488
Rxrb	0.335488
Hmga1	0.335488
Prdm15	0.335488
Msi1	0.335488
Foxo6	0.335488
Zfp764	0.331079
Zfp326	0.331079
Nr1d1	0.331079
Zfp707	0.331079
Gar1	0.331079
Ddit3	0.331079
Wdr83	0.331079
Xrcc4	0.331079
Dlx5	0.331079
Bhlhe41	0.328382
Ewsr1	0.328382
Hspa5	0.328382
Cbfb	0.328382
Hmx2	0.328382
Crebzf	0.328382
Zfp668	0.328382
Creb3	0.328382
Thap1	0.328382
Mrpl2	0.328382
Rbm22	0.328382
Zfp746	0.323233
Zbtb16	0.323233
Zfp451	0.323233
Smc3	0.323233
Pbx2	0.323233
Meis1	0.323233
Smad7	0.323233
Zfp282	0.316891
Zkscan1	0.316891
Pold2	0.316891
Arnt2	0.31645
Zfp771	0.31645
Mxd4	0.31645
Zbtb17	0.31645
Trps1	0.314579
Zfp830	0.314094
Nr1d2	0.314094
Insm1	0.314094
2310011J03Rik	0.314094
Lmo2	0.314094
Zic2	0.314094
Zfp128	0.310616
Zfp46	0.309871
Vamp3	0.309871
Erf	0.309871
Zbtb11	0.305016
Zfp2	0.305016
Bach2	0.305016
Mxi1	0.305016
Zfp711	0.305016
Prdm16	0.305016
Zfp930	0.305016
Irf1	0.305016
Rela	0.305016
Ahctf1	0.302088
Zfp780b	0.302088
Bhlhe40	0.302088
Hdx	0.302088
Polr3g	0.302088
Dmap1	0.297596
Spr	0.296869
Ppard	0.296869
Trp53	0.296869
Zbtb43	0.283051
Atf7	0.282286
Mdm2	0.282286
Traf4	0.282286
Mta3	0.282286
Six6	0.278673
Cux2	0.278673
Socs4	0.269907
Plagl2	0.269907
Hdac8	0.269907
Atf1	0.267682
Setbp1	0.266906
Spag7	0.266906
Ppp5c	0.263714
Zfp623	0.263714
Zfp790	0.258534
Nfatc3	0.256506
Esrrg	0.254715
Prdm10	0.253696
Tet1	0.253696
Zfp319	0.25163
Vps72	0.25163
Cfl2	0.25157
Htatip2	0.25157
Pqbp1	0.25157
Gm6710	0.25157
Sft2d1	0.25157
Zfp3	0.25157
Hdac2	0.250419
Pdlim5	0.250051
Clk1	0.245947
H2afy	0.245947
Zc3h7a	0.245947
Zfp287	0.245947
Hsf5	0.245947
Hivep1	0.245947
Gm14295	0.245947
Srebf1	0.245947
Nr2f6	0.245947
Apex2	0.238215
Phf21a	0.231344
Elk3	0.231344
Ebf4	0.226883
Celf5	0.224702
Zfp9	0.224702
Ivd	0.224702
Zfp146	0.224702
Zfp651	0.224702
Patz1	0.224702
Zfp580	0.224702
Zik1	0.224702
AW146154	0.224702
Got1	0.224657
Pou3f2	0.224657
Rora	0.224657
Mef2c	0.224657
Dnmt3a	0.224657
Cbx7	0.224657
Tbpl1	0.224657
Stat5b	0.224657
Gtf3a	0.224657
Zfp251	0.224657
Zfp408	0.224657
Stau2	0.224408
Pdcd11	0.224408
Smarcc2	0.224314
Mybl1	0.224314
Rfx5	0.214924
Zfp719	0.211987
Cenpb	0.211339
Sox9	0.209975
Zfhx2	0.207392
Ckmt1	0.207392
Bmyc	0.207392
Larp4	0.207392
Zfp37	0.207392
Nnt	0.207392
Zfp786	0.207392
Gtf2f1	0.202564
Ptcd1	0.202564
Rbm42	0.199502
Zfp12	0.199502
Zfp597	0.199502
Onecut2	0.199502
Gzf1	0.199502
Tob2	0.199502
Cebpb	0.199502
Rfx7	0.193538
Zkscan4	0.193538
Zbtb6	0.190081
Trim66	0.187841
Npas2	0.185497
Stat1	0.172598
Taf7	0.163941
Zfp791	0.163941
Zfp560	0.154527
Zxdb	0.151557
Ikzf2	0.142529
Ctbp2	0.13563
Foxn2	0.118228
Zfp27	0.11363
Zfp35	0.112657
Mef2d	0.102478
Zdhhc24	0.102383
Pck2	0.0942859
Vezf1	0.0942859
Tceal5	0.0942859
Zfp362	0.0942859
Myef2	0.0899409
Fez1	0.0899409
Sfpq	0.0861805
Jund	0.0861805
Prkaa1	0.0861805
Zscan20	0.0859476
Zfp523	0.082269
Gtpbp1	0.0767337
Clock	0.0767337
Nup107	0.0767337
Nfatc2	0.0765246
Zscan21	0.0765246
Sall1	0.0720583
Zfp672	0.0712623
Mynn	0.0677847
Zfp583	0.0640956
Pole3	0.0626784
Hmgb1	0.0568503
Zbtb4	0.0568503
Hdac1	0.0568503
Zfp236	0.0515369
Prkaa2	0.0469928
Zbtb39	0.0469928
Ascl1	0.0429917
Thra	0.0426096
Ube2k	0.0426096
9130019O22Rik	0.0354771
Ubp1	0.030482
Zbtb24	0.0278673
Zfx	0.0274613
Srp9	0.0270531
Rfc2	0.0256664
Psmd12	0.0249153
Klf10	0.0249153
Hivep3	0.0248242
Sox5	0.0238463
Sp3	0.0238463
Sp1	0.0177316
Zfp521	0.0163224
Zhx2	0.0158813
Agap2	0.0149509
Maz	0.0147546
Nfkb1	0.0121264
Nup133	0.0113052
Junb	0.00836081
