# Supplementary material for: Esr1-dependent signaling and transcriptional maturation in the medial preoptic area of the hypothalamus shape the development of mating behavior during adolescence
Source: eLife. 2026 Jun 19;14:RP106347. doi: 10.7554/eLife.106347 (PMC13282117; doi:10.7554/eLife.106347)
Supplement: Supplementary file 7. [file elife-106347-supp7.xlsx]

## Sheet: female_Vgat_matecluster_marker
	p_val	avg_logFC	pct.1	pct.2	p_val_adj	ratio	log_p
Hmx2	8.66666e-08	0.277267	0.134	0	0.00176323	Inf	6.34061
St3gal1	6.54329e-07	0.212604	0.118	0	0.0133123	Inf	4.31906
Tmem215	9.87822e-07	0.338886	0.124	0.005	0.0200972	24.8	3.90717
Th	1.14676e-06	0.317977	0.123	0.005	0.0233309	24.6	3.75798
Esr1	1.94936e-20	0.863577	0.364	0.021	3.96597e-16	17.3333	35.4636
Esyt3	5.09992e-07	0.255341	0.14	0.01	0.0103758	14	4.56828
Il1rap	4.66551e-10	0.427428	0.203	0.016	9.49199e-06	12.6875	11.5651
Prok2	8.23638e-06	0.297333	0.115	0.01	0.167569	11.5	1.78636
Ucp2	1.25674e-05	0.186085	0.113	0.01	0.255683	11.3	1.36382
Apoc3	2.61843e-10	0.382192	0.22	0.021	5.3272e-06	10.4762	12.1427
Slc18a2	1.98509e-15	0.938889	0.308	0.031	4.03866e-11	9.93548	23.9325
Sv2c	4.27895e-13	0.577037	0.276	0.031	8.70551e-09	8.90323	18.5593
Nts	1.02426e-10	1.04136	0.226	0.026	2.08386e-06	8.69231	13.0813
Fam46a	1.9069e-10	0.449054	0.229	0.031	3.8796e-06	7.3871	12.4598
Map3k5	9.8363e-07	0.243716	0.16	0.026	0.0200119	6.15385	3.91143
Kl	1.51835e-05	0.29429	0.127	0.021	0.308908	6.04762	1.17471
Chodl	3.89748e-09	0.481283	0.223	0.037	7.92943e-05	6.02703	9.44234
Ppp1r17	1.2907e-06	0.305438	0.155	0.026	0.0262593	5.96154	3.63974
Gal	1.13416e-11	1.15559	0.273	0.047	2.30745e-07	5.80851	15.282
Thbs3	3.34536e-06	0.306868	0.149	0.026	0.0680614	5.73077	2.68735
Gm27199	4.75865e-06	0.22218	0.149	0.026	0.0968148	5.73077	2.33496
Oprk1	4.72997e-13	0.714405	0.309	0.058	9.62312e-09	5.32759	18.4591
Fhad1	2.80889e-09	0.348685	0.241	0.047	5.71469e-05	5.12766	9.76989
Fndc9	1.82359e-12	0.52089	0.31	0.063	3.7101e-08	4.92063	17.1096
Syne2	7.52798e-07	0.244166	0.18	0.037	0.0153157	4.86486	4.17888
Pgr15l	1.03322e-07	0.465652	0.207	0.047	0.00210209	4.40426	6.16482
Gpc3	5.22176e-05	0.275134	0.136	0.031	1	4.3871	0
Sulf1	7.22624e-05	0.167873	0.135	0.031	1	4.35484	0
Ngb	2.43007e-15	0.58089	0.402	0.094	4.94397e-11	4.2766	23.7303
Pdyn	7.78571e-05	0.265855	0.13	0.031	1	4.19355	0
C1ql3	8.40179e-05	0.394111	0.129	0.031	1	4.16129	0
H2-Q2	0.000537441	0.233724	0.104	0.026	1	4	0
Gstm7	2.55644e-05	0.228394	0.156	0.042	0.520108	3.71429	0.653718
Ddc	5.60789e-06	0.312053	0.173	0.047	0.114093	3.68085	2.17074
Plxnb1	0.000142259	0.22479	0.133	0.037	1	3.59459	0
Nr2f2	4.97711e-11	0.641221	0.315	0.089	1.01259e-06	3.53933	13.803
Kcns2	7.03882e-07	0.351869	0.216	0.063	0.0143205	3.42857	4.24606
Prlr	6.04521e-29	1.1591	0.602	0.178	1.2299e-24	3.38202	55.0551
Calcr	0.000155111	0.472069	0.14	0.042	1	3.33333	0
Il13ra1	9.15076e-06	0.304922	0.186	0.058	0.186172	3.2069	1.68108
Cpne7	1.23246e-09	0.47506	0.324	0.105	2.50744e-05	3.08571	10.5937
Rprm	4.31481e-06	0.430239	0.206	0.068	0.0877849	3.02941	2.43287
Maf	0.000922847	0.17341	0.125	0.042	1	2.97619	0
Gm16485	0.00228819	0.0974518	0.11	0.037	1	2.97297	0
Cartpt	0.000404435	0.41884	0.137	0.047	1	2.91489	0
Hs3st5	3.19616e-05	0.282776	0.183	0.063	0.65026	2.90476	0.430384
Chml	0.000237427	0.226598	0.15	0.052	1	2.88462	0
Amigo2	4.43754e-05	0.266387	0.181	0.063	0.902818	2.87302	0.102235
Gm42851	2.14902e-06	0.351421	0.241	0.084	0.0437218	2.86905	3.12991
Lhx5	0.0038661	0.081302	0.105	0.037	1	2.83784	0
Sox5	2.38409e-05	0.199551	0.207	0.073	0.485044	2.83562	0.723516
C2cd4c	0.00339609	0.100095	0.104	0.037	1	2.81081	0
Trhr	0.00186404	0.16653	0.118	0.042	1	2.80952	0
Ltbp4	0.000527778	0.178875	0.146	0.052	1	2.80769	0
Znrf3	0.00387525	0.110291	0.103	0.037	1	2.78378	0
Apoa1	0.00203297	0.169092	0.116	0.042	1	2.7619	0
Crtac1	0.000729226	0.165638	0.143	0.052	1	2.75	0
Ntng1	7.39294e-17	0.970812	0.523	0.199	1.50409e-12	2.62814	27.2228
Nek7	0.000548432	0.146166	0.152	0.058	1	2.62069	0
Tmcc3	1.52508e-15	0.70435	0.478	0.183	3.10278e-11	2.61202	24.1961
Rasa4	0.0018005	0.225164	0.122	0.047	1	2.59574	0
Ypel2	0.000339369	0.18529	0.173	0.068	1	2.54412	0
Pde3b	0.0039964	0.162464	0.119	0.047	1	2.53191	0
Stum	0.00041565	0.241422	0.159	0.063	1	2.52381	0
Cacna2d1	3.84315e-07	0.490522	0.289	0.115	0.00781889	2.51304	4.85121
C1qtnf12	0.00833106	0.174619	0.103	0.042	1	2.45238	0
Gpr101	3.0133e-05	0.356591	0.218	0.089	0.613056	2.44944	0.4893
Hrk	0.00241832	0.160028	0.127	0.052	1	2.44231	0
Doc2b	0.00242932	0.146882	0.127	0.052	1	2.44231	0
Slc39a11	0.00908369	0.1307	0.102	0.042	1	2.42857	0
Id4	8.63156e-10	0.515012	0.39	0.162	1.75609e-05	2.40741	10.9498
Kdm3a	0.00910397	0.121654	0.101	0.042	1	2.40476	0
Nell2	3.0358e-07	0.318008	0.314	0.131	0.00617634	2.39695	5.08703
AC118542.1	0.00442512	0.122394	0.124	0.052	1	2.38462	0
Gm28050	0.000684868	0.152695	0.173	0.073	1	2.36986	0
Npy1r	0.00152786	0.166394	0.149	0.063	1	2.36508	0
Spint2	3.49162e-10	0.55554	0.396	0.168	7.1037e-06	2.35714	11.8549
Ptbp3	0.000984222	0.184824	0.16	0.068	1	2.35294	0
Gabrq	7.80735e-12	0.67717	0.442	0.188	1.5884e-07	2.35106	15.6554
Sdk2	3.16632e-05	0.287831	0.232	0.099	0.644187	2.34343	0.439766
Kcnq5	0.00831393	0.124874	0.11	0.047	1	2.34043	0
Enpp2	0.00249333	0.212333	0.135	0.058	1	2.32759	0
Plekhb1	4.32471e-05	0.307122	0.217	0.094	0.879862	2.30851	0.12799
Pdzrn4	2.10312e-10	0.540822	0.399	0.173	4.27881e-06	2.30636	12.3618
5930430L01Rik	0.00954137	0.137727	0.108	0.047	1	2.29787	0
Fmnl2	0.0065547	0.139762	0.119	0.052	1	2.28846	0
Twsg1	0.00688425	0.111976	0.118	0.052	1	2.26923	0
Polr2d	0.00826536	0.105015	0.118	0.052	1	2.26923	0
Wfs1	6.84725e-06	0.363939	0.268	0.12	0.139307	2.23333	1.97107
Prkab2	0.00222185	0.169081	0.151	0.068	1	2.22059	0
Galnt14	0.000205331	0.218089	0.207	0.094	1	2.20213	0
Syt6	0.0155263	0.12674	0.103	0.047	1	2.19149	0
Tmod1	0.00168316	0.179943	0.159	0.073	1	2.17808	0
Stk32a	0.00555269	0.115963	0.137	0.063	1	2.1746	0
Rasd1	0.0152601	0.192395	0.102	0.047	1	2.17021	0
Rmst	3.24676e-13	0.736694	0.541	0.251	6.60553e-09	2.15538	18.8354
Gpld1	0.00102728	0.20012	0.181	0.084	1	2.15476	0
Rorb	4.89687e-13	0.736033	0.494	0.23	9.96268e-09	2.14783	18.4244
Pde1c	1.51379e-05	0.310172	0.292	0.136	0.30798	2.14706	1.17772
Fam183b	0.001735	0.129442	0.18	0.084	1	2.14286	0
Plcxd3	5.59265e-05	0.23419	0.257	0.12	1	2.14167	0
Gm48855	0.0017199	0.309443	0.156	0.073	1	2.13699	0
Ndrg1	0.000733817	0.163028	0.211	0.099	1	2.13131	0
Ak4	0.00119896	0.139194	0.2	0.094	1	2.12766	0
Hpcal1	4.58767e-12	0.58805	0.457	0.215	9.33362e-08	2.12558	16.1871
Jam3	3.47876e-07	0.448258	0.34	0.162	0.00707754	2.09877	4.95083
Zfp932	0.0179504	0.0800387	0.109	0.052	1	2.09615	0
Ghr	0.0194945	0.13678	0.109	0.052	1	2.09615	0
Cd24a	0.00212419	0.21402	0.165	0.079	1	2.08861	0
Bnip2	0.00486629	0.147639	0.142	0.068	1	2.08824	0
Irs4	4.71467e-16	0.927373	0.492	0.236	9.592e-12	2.08475	25.3701
Slc7a8	0.00207126	0.18357	0.164	0.079	1	2.07595	0
B3gat2	0.000125854	0.331539	0.228	0.11	1	2.07273	0
Lpp	0.00468088	0.145435	0.151	0.073	1	2.06849	0
Fam174b	0.00494006	0.181	0.151	0.073	1	2.06849	0
Zfp952	0.0113461	0.0952615	0.13	0.063	1	2.06349	0
Rcn1	3.01573e-05	0.332208	0.28	0.136	0.61355	2.05882	0.488494
Ikzf2	0.00560515	0.177126	0.14	0.068	1	2.05882	0
Tshz1	0.00618573	0.145476	0.14	0.068	1	2.05882	0
Arhgap24	0.00792127	0.133746	0.139	0.068	1	2.04412	0
Bet1	0.0174646	0.135266	0.106	0.052	1	2.03846	0
Lrrc8b	0.0214695	0.115905	0.106	0.052	1	2.03846	0
4933427D14Rik	0.00374982	0.180621	0.161	0.079	1	2.03797	0
Tead1	5.19026e-06	0.392928	0.297	0.147	0.105596	2.02041	2.24814
Nkain3	0.0221094	0.107126	0.105	0.052	1	2.01923	0
Gabre	4.8597e-07	0.49357	0.364	0.183	0.00988705	1.98907	4.61653
Rgs4	1.12965e-06	0.424069	0.344	0.173	0.0229827	1.98844	3.77301
Cacna1d	0.00743013	0.17755	0.144	0.073	1	1.9726	0
Dnah1	0.0116331	0.170656	0.134	0.068	1	1.97059	0
Dpy19l3	0.00208708	0.224477	0.185	0.094	1	1.96809	0
Ptprt	0.00136701	0.358182	0.184	0.094	1	1.95745	0
Spg21	0.0131785	0.0940857	0.133	0.068	1	1.95588	0
Mast4	1.90569e-08	0.536883	0.379	0.194	0.000387712	1.95361	7.85525
Ptprg	1.16136e-05	0.359102	0.306	0.157	0.236278	1.94904	1.44274
Palld	0.0236766	0.118821	0.113	0.058	1	1.94828	0
Camk2a	7.96547e-08	0.416086	0.397	0.204	0.00162057	1.94608	6.42497
Prdx6	3.95793e-05	0.28815	0.274	0.141	0.805242	1.94326	0.216613
Creld2	0.0376093	0.102114	0.101	0.052	1	1.94231	0
Calb1	2.47019e-06	0.514641	0.335	0.173	0.0502561	1.93642	2.99062
Zdhhc14	0.0230396	0.130933	0.112	0.058	1	1.93103	0
Gck	0.000654377	0.242886	0.222	0.115	1	1.93043	0
Rab36	2.19773e-05	0.291691	0.323	0.168	0.447127	1.92262	0.804912
Ar	1.14734e-13	0.738016	0.512	0.267	2.33426e-09	1.9176	19.8756
Trpv2	0.0262357	0.105385	0.111	0.058	1	1.91379	0
Tmc4	0.0101481	0.161534	0.151	0.079	1	1.91139	0
Mapkbp1	0.00565494	0.167595	0.16	0.084	1	1.90476	0
Nipa1	0.0290777	0.123947	0.11	0.058	1	1.89655	0
Kcnj3	0.000388643	0.258584	0.238	0.126	1	1.88889	0
Gipc1	0.0228776	0.135076	0.119	0.063	1	1.88889	0
Zim1	0.000209076	0.286367	0.266	0.141	1	1.88652	0
Fbxo42	0.0359728	0.0771123	0.109	0.058	1	1.87931	0
Clmn	0.00754519	0.149372	0.157	0.084	1	1.86905	0
Stxbp2	0.02366	0.0900679	0.127	0.068	1	1.86765	0
Apex1	0.0249001	0.0818856	0.127	0.068	1	1.86765	0
Abhd6	0.00504249	0.20163	0.166	0.089	1	1.86517	0
Slc35f5	0.0349996	0.130627	0.108	0.058	1	1.86207	0
Zmym1	1.26025e-07	0.471601	0.418	0.225	0.00256398	1.85778	5.9662
Tmod3	0.00911746	0.124324	0.156	0.084	1	1.85714	0
Dgkd	0.00206707	0.155494	0.204	0.11	1	1.85455	0
Zfp386	0.0176167	0.17929	0.126	0.068	1	1.85294	0
Hdac7	0.000226764	0.275983	0.272	0.147	1	1.85034	0
Cdk18	0.00281039	0.172128	0.194	0.105	1	1.84762	0
Mast3	0.00211848	0.141027	0.203	0.11	1	1.84545	0
Tarsl2	0.00991366	0.106626	0.155	0.084	1	1.84524	0
5330417C22Rik	2.61539e-05	0.345387	0.319	0.173	0.532101	1.84393	0.630922
Pgr	1.18267e-06	0.420648	0.357	0.194	0.0240615	1.84021	3.72714
Gm19412	0.0116426	0.163044	0.145	0.079	1	1.83544	0
Thsd7a	0.000273912	0.328373	0.249	0.136	1	1.83088	0
Rtl6	0.00472704	0.10083	0.192	0.105	1	1.82857	0
Msh3	0.0293703	0.0972502	0.115	0.063	1	1.8254	0
Tmem132e	0.0314085	0.0971101	0.124	0.068	1	1.82353	0
Nphp1	0.017965	0.112968	0.144	0.079	1	1.82278	0
Snrnp40	0.0212815	0.105126	0.133	0.073	1	1.82192	0
Emb	0.000191094	0.30651	0.267	0.147	1	1.81633	0
Tmtc2	0.035504	0.163531	0.105	0.058	1	1.81034	0
Gstm6	0.0156314	0.128931	0.143	0.079	1	1.81013	0
Naaa	0.00261653	0.222528	0.198	0.11	1	1.8	0
Efcab1	0.00961344	0.148413	0.169	0.094	1	1.79787	0
Npy2r	1.42196e-05	0.33779	0.395	0.22	0.289298	1.79545	1.2403
Fkbp5	0.0329153	0.111909	0.113	0.063	1	1.79365	0
Asb3	0.0364624	0.105774	0.113	0.063	1	1.79365	0
Ptpro	1.7696e-09	0.518368	0.486	0.272	3.60026e-05	1.78676	10.2319
Rps6ka5	0.018396	0.156372	0.141	0.079	1	1.78481	0
Tesc	0.0527104	0.0942022	0.103	0.058	1	1.77586	0
Rgs9	0.0231093	0.130835	0.14	0.079	1	1.77215	0
Mkl2	1.0828e-08	0.423613	0.473	0.267	0.000220296	1.77154	8.42054
Nos1	0.00191431	0.220936	0.223	0.126	1	1.76984	0
Htr1b	0.00678391	0.142085	0.194	0.11	1	1.76364	0
Rbm24	0.0439717	0.0953855	0.111	0.063	1	1.7619	0
Ttc28	0.04618	0.111913	0.111	0.063	1	1.7619	0
Elk1	0.021001	0.136084	0.139	0.079	1	1.75949	0
Plxna3	0.0128851	0.16685	0.156	0.089	1	1.75281	0
Cald1	0.013542	0.159441	0.156	0.089	1	1.75281	0
Fam172a	0.0261222	0.08256	0.147	0.084	1	1.75	0
Cdkl2	0.000104222	0.264296	0.32	0.183	1	1.74863	0
Tspan6	0.000532421	0.212457	0.265	0.152	1	1.74342	0
Uck1	0.00663874	0.216801	0.183	0.105	1	1.74286	0
Ankrd35	0.0557686	0.0849302	0.101	0.058	1	1.74138	0
Atf5	0.0603349	0.0867183	0.101	0.058	1	1.74138	0
Scml4	0.0223214	0.124463	0.137	0.079	1	1.73418	0
Gmpr2	0.0165562	0.15514	0.163	0.094	1	1.73404	0
Ehbp1l1	0.00317463	0.223656	0.217	0.126	1	1.72222	0
Sox2	1.6679e-05	0.321952	0.378	0.22	0.339334	1.71818	1.08077
Ormdl1	0.01952	0.171193	0.144	0.084	1	1.71429	0
Cep89	0.0465335	0.0893276	0.124	0.073	1	1.69863	0
Nrip1	0.00105668	0.277122	0.231	0.136	1	1.69853	0
4930570G19Rik	0.0651344	0.0742833	0.115	0.068	1	1.69118	0
Lrrc73	0.00946878	0.18723	0.177	0.105	1	1.68571	0
St8sia2	0.0741379	0.0892162	0.106	0.063	1	1.68254	0
Rnf32	0.0593158	0.0959943	0.114	0.068	1	1.67647	0
Shc2	0.0593059	0.109933	0.122	0.073	1	1.67123	0
Wscd2	0.00037267	0.321112	0.289	0.173	1	1.67052	0
Acvr2a	0.0144996	0.0862559	0.192	0.115	1	1.66957	0
Chst11	0.00743941	0.146341	0.218	0.131	1	1.66412	0
Stk3	0.0620573	0.0745208	0.113	0.068	1	1.66176	0
Rab40b	0.0792165	0.0380263	0.113	0.068	1	1.66176	0
Uimc1	0.0479669	0.0948741	0.131	0.079	1	1.65823	0
1500009L16Rik	1.05821e-08	0.516255	0.451	0.272	0.000215293	1.65809	8.44351
Orai2	0.020984	0.0772233	0.174	0.105	1	1.65714	0
Snrpa	0.0143022	0.167646	0.19	0.115	1	1.65217	0
Ric8a	0.0209007	0.192052	0.147	0.089	1	1.65169	0
Hdac6	0.0313637	0.115402	0.147	0.089	1	1.65169	0
Nme5	0.0699661	0.11328	0.104	0.063	1	1.65079	0
Spag1	0.0734513	0.108773	0.104	0.063	1	1.65079	0
Igsf9	0.0773324	0.0978985	0.112	0.068	1	1.64706	0
Adprhl2	0.0225106	0.171657	0.163	0.099	1	1.64646	0
Rab27a	0.0483886	0.0785779	0.13	0.079	1	1.64557	0
Bean1	0.0588609	0.081994	0.13	0.079	1	1.64557	0
Ddr1	0.0683895	0.103881	0.12	0.073	1	1.64384	0
Nr1d1	0.0437959	0.0796447	0.146	0.089	1	1.64045	0
Adi1	0.049236	0.0684411	0.146	0.089	1	1.64045	0
Dgkb	1.70729e-06	0.365495	0.446	0.272	0.0347348	1.63971	3.36001
Etnk2	0.0336709	0.13058	0.154	0.094	1	1.6383	0
Cdk2ap2	0.0156423	0.148003	0.18	0.11	1	1.63636	0
Zpr1	0.035215	0.123773	0.145	0.089	1	1.62921	0
Rybp	0.00119939	0.185524	0.306	0.188	1	1.62766	0
Pdia4	0.032669	0.151025	0.161	0.099	1	1.62626	0
Zfp92	0.0190004	0.103379	0.195	0.12	1	1.625	0
Pak6	0.0026109	0.182764	0.263	0.162	1	1.62346	0
Igfbp5	0.00861956	0.256432	0.204	0.126	1	1.61905	0
Sox1	0.0227689	0.117737	0.17	0.105	1	1.61905	0
1190002N15Rik	0.046404	0.131714	0.136	0.084	1	1.61905	0
Bhlhe41	0.000957158	0.269075	0.28	0.173	1	1.6185	0
Gtpbp6	0.0545487	0.0880245	0.144	0.089	1	1.61798	0
Tmem132b	0.00166159	0.233484	0.296	0.183	1	1.61749	0
Sec22c	0.0208595	0.156885	0.186	0.115	1	1.61739	0
Ppm1m	0.088772	0.0790673	0.118	0.073	1	1.61644	0
Bub3	3.11259e-06	0.392733	0.415	0.257	0.0633256	1.61479	2.75947
Odc1	4.19096e-05	0.339452	0.355	0.22	0.852651	1.61364	0.159405
Sorcs1	0.00935724	0.146031	0.227	0.141	1	1.60993	0
Riiad1	0.0143982	0.174474	0.193	0.12	1	1.60833	0
Lcorl	0.016214	0.148772	0.193	0.12	1	1.60833	0
Tmem231	0.0467993	0.128628	0.135	0.084	1	1.60714	0
Slit1	0.0912918	0.118452	0.101	0.063	1	1.60317	0
Nme7	0.0917065	0.0679022	0.109	0.068	1	1.60294	0
Plxna2	1.40688e-05	0.344271	0.394	0.246	0.286231	1.60163	1.25096
D430019H16Rik	0.00032904	0.227138	0.334	0.209	1	1.59809	0
Smpd3	0.00104845	0.271376	0.292	0.183	1	1.59563	0
Kcnh1	0.0446347	0.115588	0.142	0.089	1	1.59551	0
Ephb2	0.0622601	0.109574	0.126	0.079	1	1.59494	0
Pcdh20	0.00606039	0.255107	0.234	0.147	1	1.59184	0
Nectin3	0.0233895	0.152907	0.175	0.11	1	1.59091	0
Usp51	0.0923438	0.105099	0.108	0.068	1	1.58824	0
Uros	0.0950886	0.101145	0.108	0.068	1	1.58824	0
Zfp937	0.102491	0.0825755	0.108	0.068	1	1.58824	0
Zfyve26	0.103922	0.0749468	0.108	0.068	1	1.58824	0
Rnf112	6.03402e-05	0.285344	0.416	0.262	1	1.58779	0
Tnpo1	0.0041366	0.225188	0.233	0.147	1	1.58503	0
Bclaf3	0.0435972	0.163953	0.141	0.089	1	1.58427	0
Foxk1	0.0709466	0.0768113	0.133	0.084	1	1.58333	0
Ssh3	0.0695223	0.070847	0.125	0.079	1	1.58228	0
Foxp4	0.0166958	0.143785	0.223	0.141	1	1.58156	0
Drp2	0.0296179	0.157422	0.166	0.105	1	1.58095	0
Atg16l2	0.0335582	0.128132	0.173	0.11	1	1.57273	0
BC004004	0.0215444	0.12099	0.206	0.131	1	1.57252	0
Sema4a	0.0145634	0.201023	0.198	0.126	1	1.57143	0
Sdad1	0.0374635	0.110211	0.165	0.105	1	1.57143	0
Tmem216	0.0776318	0.128705	0.124	0.079	1	1.56962	0
Amn1	0.000109129	0.275214	0.386	0.246	1	1.56911	0
Lrch3	0.0235435	0.189	0.188	0.12	1	1.56667	0
2021-09-01	0.0578096	0.157156	0.139	0.089	1	1.5618	0
Ccp110	0.0158746	0.12242	0.22	0.141	1	1.56028	0
Isl1	0.0781189	0.123057	0.131	0.084	1	1.55952	0
Traf3ip1	0.100385	0.0919328	0.106	0.068	1	1.55882	0
Endov	0.114854	0.0628562	0.106	0.068	1	1.55882	0
Stk32c	0.00633275	0.149813	0.244	0.157	1	1.55414	0
Tspan17	0.00622025	0.221818	0.235	0.152	1	1.54605	0
Suv39h1	0.050438	0.10077	0.153	0.099	1	1.54545	0
Ddx18	0.0118929	0.193263	0.227	0.147	1	1.54422	0
Susd2	0.124475	0.0599522	0.105	0.068	1	1.54412	0
Tmed3	0.0105192	0.184134	0.234	0.152	1	1.53947	0
AW551984	2.02868e-13	0.620383	0.588	0.382	4.12734e-09	1.53927	19.3056
Drg2	0.079712	0.0972224	0.129	0.084	1	1.53571	0
Gm2a	0.0847393	0.110346	0.129	0.084	1	1.53571	0
Dusp18	0.0629561	0.0932879	0.152	0.099	1	1.53535	0
Senp8	0.0872362	0.0279701	0.152	0.099	1	1.53535	0
Wdr5	0.116473	0.0706786	0.112	0.073	1	1.53425	0
Mfsd10	0.0242537	0.193189	0.184	0.12	1	1.53333	0
Snd1	0.0477881	0.0599997	0.193	0.126	1	1.53175	0
Kbtbd11	0.0104532	0.171638	0.225	0.147	1	1.53061	0
Pttg1ip	0.113798	0.109574	0.104	0.068	1	1.52941	0
Sccpdh	2.12232e-05	0.362513	0.432	0.283	0.431787	1.5265	0.839824
Tmem158	8.44618e-10	0.716593	0.551	0.361	1.71838e-05	1.52632	10.9715
Scn5a	0.125084	0.0800458	0.111	0.073	1	1.52055	0
Brinp2	0.00127955	0.227993	0.334	0.22	1	1.51818	0
Tbc1d30	0.0459601	0.0658731	0.167	0.11	1	1.51818	0
Spns2	0.0872074	0.0549065	0.135	0.089	1	1.51685	0
Pmpcb	0.0996254	0.0541133	0.135	0.089	1	1.51685	0
Snhg10	0.0526044	0.110534	0.181	0.12	1	1.50833	0
Phf6	0.0286748	0.121972	0.19	0.126	1	1.50794	0
Efna5	2.06546e-11	0.599748	0.576	0.382	4.20217e-07	1.50785	14.6825
Gpd2	0.00223012	0.21266	0.315	0.209	1	1.50718	0
Tmem185b	0.115165	0.0840567	0.11	0.073	1	1.50685	0
Tbc1d32	0.0913881	0.117924	0.119	0.079	1	1.50633	0
Crip2	0.0114945	0.20415	0.244	0.162	1	1.50617	0
Nudt10	0.0121024	0.18394	0.244	0.162	1	1.50617	0
Mettl1	0.0936739	0.0944667	0.134	0.089	1	1.50562	0
Mical2	0.0763526	0.0409061	0.173	0.115	1	1.50435	0
Sema4d	0.0188738	0.179216	0.212	0.141	1	1.50355	0
Lrp1b	1.50535e-12	0.568596	0.629	0.419	3.06264e-08	1.50119	17.3014
Fam229b	0.0110062	0.183461	0.228	0.152	1	1.5	0
Wdfy1	0.0467231	0.136422	0.18	0.12	1	1.5	0
Rad9b	0.0742137	0.174168	0.141	0.094	1	1.5	0
Ankle2	0.0749947	0.0414171	0.165	0.11	1	1.5	0
Foxo1	0.0763634	0.123955	0.126	0.084	1	1.5	0
Tsen2	0.129803	0.104488	0.102	0.068	1	1.5	0
Mthfd2	0.166934	0.043835	0.102	0.068	1	1.5	0
Ankrd6	0.00647279	0.167795	0.259	0.173	1	1.49711	0
Gstz1	0.035814	0.100688	0.196	0.131	1	1.49618	0
Dbn1	1.88514e-05	0.344916	0.438	0.293	0.383532	1.49488	0.958334
Grm7	0.00384264	0.200056	0.29	0.194	1	1.49485	0
Gm15446	0.0766134	0.179928	0.133	0.089	1	1.49438	0
Drc1	0.0871576	0.0919043	0.133	0.089	1	1.49438	0
Ryr3	0.100377	0.0835128	0.133	0.089	1	1.49438	0
Mamld1	0.114245	0.0906505	0.118	0.079	1	1.49367	0
Nos1ap	0.000952553	0.25303	0.391	0.262	1	1.49237	0
2010005H15Rik	0.0611057	0.121425	0.164	0.11	1	1.49091	0
Fam19a1	0.076375	0.287909	0.125	0.084	1	1.4881	0
Sez6l	3.45131e-14	0.615837	0.7	0.471	7.0217e-10	1.4862	21.0768
Hook2	0.0175827	0.185488	0.257	0.173	1	1.48555	0
Xpnpep3	0.135132	0.116899	0.101	0.068	1	1.48529	0
Smad2	0.164355	0.0677258	0.101	0.068	1	1.48529	0
Srm	0.0880223	0.104842	0.132	0.089	1	1.48315	0
Sdf2l1	0.107112	0.0889694	0.132	0.089	1	1.48315	0
Dnajb11	0.0340246	0.209437	0.17	0.115	1	1.47826	0
Adcy6	0.0492046	0.175316	0.17	0.115	1	1.47826	0
Fuz	0.0886542	0.120516	0.146	0.099	1	1.47475	0
2021-03-08	0.00556278	0.209425	0.286	0.194	1	1.47423	0
Tfdp1	0.0448789	0.098829	0.193	0.131	1	1.47328	0
Pitpnm3	0.0452605	0.124892	0.193	0.131	1	1.47328	0
Me1	0.0712461	0.102905	0.162	0.11	1	1.47273	0
Ppp2r3d	0.0824588	0.1014	0.162	0.11	1	1.47273	0
Gm13889	0.0645959	0.0930917	0.185	0.126	1	1.46825	0
2610301B20Rik	0.00476854	0.152471	0.299	0.204	1	1.46569	0
Cgref1	0.129551	0.00843808	0.145	0.099	1	1.46465	0
Ildr2	0.0030398	0.245197	0.322	0.22	1	1.46364	0
Arhgap1	0.0227591	0.171855	0.215	0.147	1	1.46259	0
Nfkbia	0.0977524	0.0989908	0.13	0.089	1	1.46067	0
Rrs1	0.0919743	0.103263	0.137	0.094	1	1.45745	0
Csnk1g1	0.0122814	0.173464	0.236	0.162	1	1.45679	0
5031425E22Rik	0.0204254	0.152858	0.252	0.173	1	1.45665	0
Tmem237	0.0224731	0.13268	0.252	0.173	1	1.45665	0
Fpgt	0.113915	0.11522	0.115	0.079	1	1.4557	0
Syt5	0.000850959	0.269288	0.358	0.246	1	1.45528	0
Ebpl	0.0225447	0.172393	0.221	0.152	1	1.45395	0
Ets2	0.000494375	0.287343	0.334	0.23	1	1.45217	0
Zfhx4	0.00112536	0.264602	0.357	0.246	1	1.45122	0
Ccdc137	0.119719	0.100936	0.129	0.089	1	1.44944	0
Fam219b	0.130092	0.0716563	0.129	0.089	1	1.44944	0
Hyou1	0.0504011	0.176458	0.182	0.126	1	1.44444	0
Man2c1	0.102687	0.139153	0.143	0.099	1	1.44444	0
Pak2	0.0139142	0.158163	0.257	0.178	1	1.44382	0
Lrp3	0.0194928	0.158757	0.257	0.178	1	1.44382	0
Gna13	0.0686998	0.115451	0.166	0.115	1	1.44348	0
Cfap69	0.138133	0.0477512	0.114	0.079	1	1.44304	0
Lncpint	0.143182	0.0906805	0.114	0.079	1	1.44304	0
Trmu	0.173813	0.0366525	0.114	0.079	1	1.44304	0
Pbxip1	0.135392	0.0960425	0.121	0.084	1	1.44048	0
Sec11a	0.0434521	0.152879	0.203	0.141	1	1.43972	0
Pak7	0.00190685	0.291259	0.354	0.246	1	1.43902	0
Npm3	0.175584	0.0578526	0.105	0.073	1	1.43836	0
Mgat1	0.037494	0.130293	0.233	0.162	1	1.43827	0
Rbbp9	0.0934666	0.0730509	0.151	0.105	1	1.4381	0
Asb1	0.105113	0.0878018	0.151	0.105	1	1.4381	0
Klhl3	0.0598648	0.167853	0.181	0.126	1	1.43651	0
Crim1	0.00016033	0.233225	0.428	0.298	1	1.43624	0
Dlx2	0.00385634	0.228919	0.3	0.209	1	1.43541	0
Kat6b	0.0362957	0.178997	0.188	0.131	1	1.43511	0
Ubap2	0.0716274	0.115357	0.165	0.115	1	1.43478	0
St3gal2	0.0392109	0.137323	0.218	0.152	1	1.43421	0
Ssbp1	0.0185752	0.194492	0.248	0.173	1	1.43353	0
B3galt6	0.0998707	0.102647	0.172	0.12	1	1.43333	0
Cdk4	0.0471716	0.139843	0.202	0.141	1	1.43262	0
Olfm3	0.000693361	0.329223	0.382	0.267	1	1.43071	0
Slc7a1	0.00682623	0.240123	0.299	0.209	1	1.43062	0
D730003I15Rik	0.139771	0.109024	0.113	0.079	1	1.43038	0
Tmem28	0.176061	0.038723	0.113	0.079	1	1.43038	0
Poc5	0.125146	0.0974452	0.12	0.084	1	1.42857	0
Pisd	0.012084	0.248262	0.254	0.178	1	1.42697	0
Dhx40	0.128828	0.0833862	0.127	0.089	1	1.42697	0
Rnf113a2	0.134537	0.0657501	0.127	0.089	1	1.42697	0
Elmo2	0.0691664	0.113948	0.194	0.136	1	1.42647	0
Gpr27	0.0115915	0.19387	0.261	0.183	1	1.42623	0
Slitrk2	0.0632671	0.239094	0.164	0.115	1	1.42609	0
Hpca	0.0573421	0.0913812	0.201	0.141	1	1.42553	0
Cd2ap	0.0793006	0.0926258	0.171	0.12	1	1.425	0
Skiv2l	0.155953	0.134052	0.104	0.073	1	1.42466	0
Cnppd1	0.199885	0.0654082	0.104	0.073	1	1.42466	0
Rab9	0.11357	0.0884891	0.149	0.105	1	1.41905	0
2510039O18Rik	0.176822	0.100954	0.112	0.079	1	1.41772	0
Abhd17c	0.178035	0.0609172	0.112	0.079	1	1.41772	0
Prrc1	0.194538	0.039786	0.112	0.079	1	1.41772	0
Anxa6	0.0766839	0.147988	0.163	0.115	1	1.41739	0
Suz12	0.020601	0.16424	0.245	0.173	1	1.41618	0
Elmod2	0.147843	0.105195	0.133	0.094	1	1.41489	0
Ankrd54	0.162706	0.0889678	0.133	0.094	1	1.41489	0
Pibf1	0.165894	0.0767169	0.14	0.099	1	1.41414	0
Pcbd1	0.00455375	0.178725	0.37	0.262	1	1.41221	0
Pak1ip1	0.0844397	0.104498	0.192	0.136	1	1.41176	0
Pfkfb4	0.177918	0.100247	0.103	0.073	1	1.41096	0
Rdh11	0.220446	0.0371325	0.103	0.073	1	1.41096	0
Tnfrsf21	0.00175045	0.290761	0.399	0.283	1	1.40989	0
Tram1l1	0.0014228	0.24862	0.42	0.298	1	1.4094	0
2010315B03Rik	0.0943783	0.0853297	0.169	0.12	1	1.40833	0
Sox4	0.00226107	0.302173	0.353	0.251	1	1.40637	0
Edil3	6.81012e-05	0.311742	0.537	0.382	1	1.40576	0
Rpf2	0.161547	0.113003	0.111	0.079	1	1.40506	0
Amz2	0.0447461	0.121039	0.236	0.168	1	1.40476	0
Itgb1	0.0872233	0.111659	0.177	0.126	1	1.40476	0
Utp18	0.18096	0.0820615	0.118	0.084	1	1.40476	0
Nfix	0.122816	0.225311	0.125	0.089	1	1.40449	0
Slc5a5	0.0746911	0.0820805	0.191	0.136	1	1.40441	0
Tmem14c	0.100082	0.0804422	0.191	0.136	1	1.40441	0
Stxbp5l	0.0154634	0.202519	0.279	0.199	1	1.40201	0
Npc1	0.0362345	0.212863	0.213	0.152	1	1.40132	0
Magel2	0.00163032	0.280939	0.36	0.257	1	1.40078	0
Atf1	0.112711	0.111371	0.147	0.105	1	1.4	0
Gatd1	0.11662	0.0969032	0.161	0.115	1	1.4	0
Surf4	0.0198018	0.204417	0.263	0.188	1	1.39894	0
Esyt2	0.0415772	0.119208	0.242	0.173	1	1.39884	0
Gabrg1	0.0012532	0.298419	0.425	0.304	1	1.39803	0
Ehd4	0.247248	0.0463398	0.102	0.073	1	1.39726	0
Lman2	0.015425	0.217201	0.271	0.194	1	1.39691	0
Ext2	0.0423603	0.18344	0.226	0.162	1	1.39506	0
Banp	0.0685327	0.163556	0.212	0.152	1	1.39474	0
Tubgcp4	0.160046	0.103189	0.131	0.094	1	1.39362	0
Zfhx3	0.000361388	0.194258	0.627	0.45	1	1.39333	0
Dcaf13	0.150765	0.138843	0.124	0.089	1	1.39326	0
Mlx	0.17661	0.049589	0.124	0.089	1	1.39326	0
Slc6a11	0.00177242	0.262363	0.365	0.262	1	1.39313	0
Ypel1	0.218761	0.0480984	0.11	0.079	1	1.39241	0
Fbxo10	0.00598553	0.236687	0.32	0.23	1	1.3913	0
Trpc7	0.16349	0.0260054	0.146	0.105	1	1.39048	0
9030624J02Rik	0.0634378	0.0903408	0.196	0.141	1	1.39007	0
Gabrg3	0.00280377	0.176742	0.385	0.277	1	1.38989	0
Nat14	0.0140949	0.200763	0.29	0.209	1	1.38756	0
Por	0.0171767	0.228346	0.276	0.199	1	1.38693	0
Adpgk	0.161488	0.0797615	0.137	0.099	1	1.38384	0
Pnpt1	0.18073	0.056781	0.137	0.099	1	1.38384	0
Klhl8	0.219857	0.0788983	0.101	0.073	1	1.38356	0
Fbxl6	0.156112	0.119674	0.13	0.094	1	1.38298	0
Cd151	0.163521	0.114554	0.13	0.094	1	1.38298	0
Dennd1a	0.034392	0.188031	0.217	0.157	1	1.38217	0
Ptprk	0.0477257	0.168027	0.275	0.199	1	1.38191	0
Lrch2	0.0700778	0.0956067	0.21	0.152	1	1.38158	0
Tet2	0.0248	0.186648	0.232	0.168	1	1.38095	0
Snhg9	0.0562103	0.151337	0.232	0.168	1	1.38095	0
Fam161b	0.112115	0.134933	0.145	0.105	1	1.38095	0
Cdk5rap3	0.163777	0.147707	0.116	0.084	1	1.38095	0
Cacna1h	0.1696	0.144242	0.116	0.084	1	1.38095	0
Slc38a6	0.19653	0.120294	0.109	0.079	1	1.37975	0
Slc30a10	0.207675	0.0750881	0.109	0.079	1	1.37975	0
Washc5	0.248316	0.0296836	0.109	0.079	1	1.37975	0
Pdcd5	0.00202627	0.196074	0.426	0.309	1	1.37864	0
Gkap1	0.00400877	0.223262	0.354	0.257	1	1.37743	0
Foxg1	0.00973504	0.191173	0.325	0.236	1	1.37712	0
Cacnb3	0.0374028	0.135485	0.223	0.162	1	1.37654	0
Fbrsl1	0.0673088	0.111119	0.202	0.147	1	1.37415	0
Shisa9	0.00368098	0.280694	0.36	0.262	1	1.37405	0
Aagab	0.16009	0.0638188	0.136	0.099	1	1.37374	0
B230217O12Rik	0.162286	0.0812785	0.136	0.099	1	1.37374	0
Ngef	0.176075	0.0763698	0.136	0.099	1	1.37374	0
Znrf2	0.204773	0.0177146	0.136	0.099	1	1.37374	0
Rad17	0.114305	0.0935811	0.151	0.11	1	1.37273	0
Tmub2	0.161081	0.0514115	0.151	0.11	1	1.37273	0
Alg10b	0.0114757	0.249228	0.28	0.204	1	1.37255	0
Crocc	0.023009	0.220247	0.251	0.183	1	1.37158	0
Snapc3	0.0411997	0.211996	0.222	0.162	1	1.37037	0
Cacna2d3	0.217135	0.0616821	0.115	0.084	1	1.36905	0
1110038F14Rik	0.093817	0.102119	0.193	0.141	1	1.36879	0
Fam13a	0.0221121	0.236386	0.286	0.209	1	1.36842	0
Trpc5	0.0271432	0.167791	0.279	0.204	1	1.36765	0
Nr2f6	0.230405	0.0569962	0.108	0.079	1	1.36709	0
Eif4e3	0.114547	0.0982307	0.157	0.115	1	1.36522	0
Ecel1	0.000512543	0.480234	0.378	0.277	1	1.36462	0
Zbtb20	8.36741e-17	0.678064	0.764	0.56	1.70235e-12	1.36429	27.099
Tle2	0.149253	0.13057	0.15	0.11	1	1.36364	0
Snrpg	0.00170272	0.209682	0.421	0.309	1	1.36246	0
Myg1	0.147413	0.118007	0.143	0.105	1	1.3619	0
Kctd10	0.178667	0.0417185	0.143	0.105	1	1.3619	0
Pcsk2	0.000424099	0.360871	0.463	0.34	1	1.36176	0
Fxyd2	0.0843996	0.0983946	0.2	0.147	1	1.36054	0
Samd10	0.183878	0.113509	0.121	0.089	1	1.35955	0
Ccnk	0.20645	0.0551661	0.121	0.089	1	1.35955	0
Pxylp1	0.215667	0.0844105	0.121	0.089	1	1.35955	0
Ldb2	0.118651	0.119922	0.163	0.12	1	1.35833	0
Kbtbd7	0.0747317	0.0987878	0.228	0.168	1	1.35714	0
Trmt2a	0.103647	0.179336	0.171	0.126	1	1.35714	0
Gosr1	0.144551	0.0281841	0.171	0.126	1	1.35714	0
Saxo2	0.196125	0.0622844	0.114	0.084	1	1.35714	0
Gspt2	0.153224	0.0913101	0.156	0.115	1	1.35652	0
Ak2	0.102537	0.136054	0.191	0.141	1	1.35461	0
Maml3	0.147566	0.0999812	0.134	0.099	1	1.35354	0
Fech	0.195696	0.068132	0.134	0.099	1	1.35354	0
Pgls	0.108704	0.122042	0.184	0.136	1	1.35294	0
Dlx1	7.30465e-06	0.40293	0.488	0.361	0.148613	1.3518	1.90641
Yipf6	0.103523	0.168255	0.177	0.131	1	1.35115	0
Gpx3	0.000200069	0.335521	0.481	0.356	1	1.35112	0
Pold4	0.202033	0.0865401	0.127	0.094	1	1.35106	0
Usp4	0.0139581	0.230851	0.297	0.22	1	1.35	0
Csad	0.140146	0.0805416	0.17	0.126	1	1.34921	0
Sgsm3	0.134004	0.147321	0.155	0.115	1	1.34783	0
Fem1a	0.154982	0.0579467	0.155	0.115	1	1.34783	0
Tmem175	0.159656	0.0692156	0.155	0.115	1	1.34783	0
Man2b1	0.17123	0.0929246	0.155	0.115	1	1.34783	0
Ctxn1	2.13799e-07	0.406211	0.578	0.429	0.00434975	1.34732	5.43764
Siva1	0.127757	0.0690401	0.183	0.136	1	1.34559	0
Cdh2	1.01143e-05	0.335028	0.612	0.455	0.205775	1.34505	1.58097
Ppp1r12b	0.0793979	0.11	0.204	0.152	1	1.34211	0
Cpsf4	0.248273	0.120723	0.106	0.079	1	1.34177	0
Ino80	0.276752	0.0310997	0.106	0.079	1	1.34177	0
Ilf3	0.0113218	0.201018	0.316	0.236	1	1.33898	0
Manbal	0.060607	0.122771	0.245	0.183	1	1.3388	0
Tmem109	0.10968	0.103243	0.182	0.136	1	1.33824	0
Ing2	0.0704151	0.144808	0.21	0.157	1	1.33758	0
Rgs11	0.166676	0.101661	0.147	0.11	1	1.33636	0
Dpf1	0.098775	0.157904	0.175	0.131	1	1.33588	0
Ncoa5	0.113175	0.103009	0.175	0.131	1	1.33588	0
Yeats2	0.0731854	0.130755	0.231	0.173	1	1.33526	0
Glce	0.0623774	0.132704	0.251	0.188	1	1.33511	0
Actl6b	0.0297268	0.197931	0.279	0.209	1	1.33493	0
Alkbh1	0.0111823	0.237308	0.356	0.267	1	1.33333	0
Mrap2	0.0272344	0.196028	0.272	0.204	1	1.33333	0
Cmtr1	0.0819138	0.0967573	0.244	0.183	1	1.33333	0
Ift122	0.111887	0.14056	0.196	0.147	1	1.33333	0
Dph6	0.128575	0.100402	0.16	0.12	1	1.33333	0
Arvcf	0.27929	0.0424353	0.112	0.084	1	1.33333	0
Smc5	0.0390532	0.154187	0.278	0.209	1	1.33014	0
Ralb	0.23852	0.0787488	0.125	0.094	1	1.32979	0
Fyco1	0.0313487	0.182316	0.271	0.204	1	1.32843	0
Gm26890	0.156957	0.0829354	0.174	0.131	1	1.32824	0
Sat2	0.162395	0.101115	0.146	0.11	1	1.32727	0
Slc35a1	0.169879	0.103554	0.146	0.11	1	1.32727	0
Hcfc2	0.256084	0.0498992	0.118	0.089	1	1.32584	0
Ogfr	0.25879	0.079377	0.118	0.089	1	1.32584	0
P3h4	0.269609	0.0866079	0.118	0.089	1	1.32584	0
Ipo5	0.0296395	0.162158	0.285	0.215	1	1.32558	0
Ufl1	0.148771	0.12312	0.167	0.126	1	1.3254	0
Plgrkt	0.181651	0.0803311	0.159	0.12	1	1.325	0
Nr3c1	0.00879162	0.191436	0.381	0.288	1	1.32292	0
Vti1a	0.189434	0.0823269	0.152	0.115	1	1.32174	0
Mospd3	0.198686	0.100566	0.152	0.115	1	1.32174	0
Sox11	1.37378e-06	0.398746	0.567	0.429	0.0279496	1.32168	3.57735
Cdkl3	0.226841	0.114076	0.111	0.084	1	1.32143	0
Vps54	0.251503	0.0801599	0.111	0.084	1	1.32143	0
Jmjd8	0.270315	0.0877525	0.111	0.084	1	1.32143	0
Slco3a1	0.101641	0.104572	0.214	0.162	1	1.32099	0
Spty2d1	0.209509	0.100342	0.124	0.094	1	1.31915	0
Ulk4	0.257944	0.0955392	0.124	0.094	1	1.31915	0
Fbll1	0.309028	0.0071431	0.124	0.094	1	1.31915	0
Mccc1	0.155345	0.128656	0.145	0.11	1	1.31818	0
Nynrin	0.173406	0.0893499	0.145	0.11	1	1.31818	0
Ankrd49	0.18425	0.104235	0.145	0.11	1	1.31818	0
Cacna1c	0.157289	0.122315	0.166	0.126	1	1.31746	0
Prrt1	0.00187302	0.275105	0.407	0.309	1	1.31715	0
Alkbh7	0.273054	0.0578147	0.104	0.079	1	1.31646	0
Tmem255a	1.22043e-14	0.738082	0.751	0.571	2.48297e-10	1.31524	22.1164
Scn9a	0.000989923	0.296575	0.489	0.372	1	1.31452	0
Rassf8	0.0162401	0.19566	0.364	0.277	1	1.31408	0
Tox3	0.264699	0.0536853	0.13	0.099	1	1.31313	0
Tfcp2	0.102053	0.154074	0.193	0.147	1	1.31293	0
Zfp667	0.13564	0.0934362	0.193	0.147	1	1.31293	0
Ccdc112	0.0615083	0.138608	0.227	0.173	1	1.31214	0
Ccnb1ip1	0.0493216	0.228004	0.254	0.194	1	1.30928	0
C2cd3	0.188749	0.0974675	0.144	0.11	1	1.30909	0
Zfp157	0.00177296	0.347085	0.377	0.288	1	1.30903	0
Tcea2	0.125881	0.105408	0.233	0.178	1	1.30899	0
Isyna1	0.127478	0.150194	0.178	0.136	1	1.30882	0
Slc27a1	0.192702	0.0990999	0.157	0.12	1	1.30833	0
Seh1l	0.180258	0.0711189	0.171	0.131	1	1.30534	0
Ccdc74a	0.182239	0.0829863	0.171	0.131	1	1.30534	0
Cyth1	0.11657	0.0839311	0.184	0.141	1	1.30496	0
Commd9	0.195767	0.102077	0.137	0.105	1	1.30476	0
Aldh6a1	0.226557	0.0912893	0.15	0.115	1	1.30435	0
Ttc5	0.233463	0.0727774	0.15	0.115	1	1.30435	0
Plppr2	0.0119379	0.216928	0.369	0.283	1	1.30389	0
E130308A19Rik	0.290853	0.0365127	0.103	0.079	1	1.3038	0
Selenon	0.305793	0.0254066	0.103	0.079	1	1.3038	0
Ifrd1	0.233823	0.0981715	0.116	0.089	1	1.30337	0
Erlin1	0.262734	0.0877057	0.116	0.089	1	1.30337	0
Srf	0.270282	0.062147	0.116	0.089	1	1.30337	0
Trpm4	0.286655	0.0383273	0.116	0.089	1	1.30337	0
Tshz2	3.92811e-05	0.346404	0.593	0.455	0.799175	1.3033	0.224175
Amt	0.22683	0.144767	0.129	0.099	1	1.30303	0
Stk19	0.0152843	0.208676	0.314	0.241	1	1.3029	0
Lrrn2	0.0412868	0.107198	0.293	0.225	1	1.30222	0
Cars2	0.205438	0.0697353	0.164	0.126	1	1.30159	0
Tacc2	0.0360571	0.173585	0.341	0.262	1	1.30153	0
Mrpl14	0.168882	0.0318728	0.177	0.136	1	1.30147	0
Cobl	0.192326	0.0877452	0.177	0.136	1	1.30147	0
Arl4a	0.0360254	0.150132	0.307	0.236	1	1.30085	0
Maoa	0.0765796	0.13908	0.225	0.173	1	1.30058	0
Smarcc1	0.0212082	0.190108	0.368	0.283	1	1.30035	0
Kpna4	0.0482002	0.131328	0.286	0.22	1	1.3	0
Brd1	0.169885	0.0911394	0.156	0.12	1	1.3	0
E130307A14Rik	0.0804899	0.172241	0.244	0.188	1	1.29787	0
Unc5a	0.0606072	0.181246	0.231	0.178	1	1.29775	0
Igdcc4	0.12216	0.0813706	0.231	0.178	1	1.29775	0
Shank2	0.153958	0.100671	0.17	0.131	1	1.29771	0
P4ha1	0.162756	0.120957	0.17	0.131	1	1.29771	0
Selenos	0.117887	0.0994365	0.218	0.168	1	1.29762	0
Plod3	0.28078	0.0633608	0.109	0.084	1	1.29762	0
Wiz	0.283761	0.0816316	0.109	0.084	1	1.29762	0
Setd6	0.33915	0.0304015	0.109	0.084	1	1.29762	0
Numbl	0.131003	0.114657	0.197	0.152	1	1.29605	0
Mto1	0.249473	0.0921039	0.136	0.105	1	1.29524	0
Ckap5	0.0689027	0.140804	0.237	0.183	1	1.29508	0
Mrto4	0.138557	0.0730285	0.19	0.147	1	1.29252	0
Efnb1	0.296318	0.0973238	0.115	0.089	1	1.29213	0
Penk	0.0589418	0.425714	0.217	0.168	1	1.29167	0
Flcn	0.262025	0.010523	0.155	0.12	1	1.29167	0
Imp3	0.0953365	0.120789	0.257	0.199	1	1.29146	0
Ttc4	0.036626	0.244038	0.297	0.23	1	1.2913	0
Cdh22	0.341201	0.0487292	0.102	0.079	1	1.29114	0
Psmd13	0.1615	0.119574	0.182	0.141	1	1.29078	0
Fbxo2	0.192663	0.0670645	0.169	0.131	1	1.29008	0
Nrp1	0.0430993	0.285546	0.263	0.204	1	1.28922	0
Lypd1	0.0597612	0.201838	0.263	0.204	1	1.28922	0
Tjp1	0.26348	0.068978	0.121	0.094	1	1.28723	0
Xndc1	0.264643	0.101161	0.121	0.094	1	1.28723	0
Ift22	0.0539366	0.120896	0.269	0.209	1	1.28708	0
Cntn2	0.103466	0.0930413	0.256	0.199	1	1.28643	0
Edc4	0.324545	0.0712006	0.108	0.084	1	1.28571	0
Hpcal4	0.000169583	0.31391	0.451	0.351	1	1.2849	0
Stx1a	0.138091	0.127774	0.208	0.162	1	1.28395	0
Surf2	0.160405	0.111608	0.208	0.162	1	1.28395	0
Pdik1l	0.142259	0.115208	0.181	0.141	1	1.28369	0
Zfp942	0.217927	0.0647775	0.181	0.141	1	1.28369	0
Micu1	0.14811	0.14735	0.154	0.12	1	1.28333	0
Vangl2	0.136544	0.100708	0.222	0.173	1	1.28324	0
1810041L15Rik	0.027433	0.172464	0.349	0.272	1	1.28309	0
Pou2f2	0.0247764	0.197683	0.39	0.304	1	1.28289	0
Crtc1	0.0756922	0.106361	0.241	0.188	1	1.28191	0
Dpy19l1	0.0829343	0.123697	0.228	0.178	1	1.2809	0
Mrpl32	0.0629774	0.134177	0.288	0.225	1	1.28	0
Zmat4	0.0677647	0.150276	0.288	0.225	1	1.28	0
Npr2	0.139508	0.136679	0.188	0.147	1	1.27891	0
Asb7	0.219622	0.0693928	0.147	0.115	1	1.27826	0
Anapc4	0.121669	0.123665	0.207	0.162	1	1.27778	0
Ctr9	0.15452	0.131179	0.161	0.126	1	1.27778	0
Phlda1	0.185009	0.117484	0.161	0.126	1	1.27778	0
Coq4	0.307646	0.0726961	0.12	0.094	1	1.2766	0
Nhp2	0.316247	0.0459503	0.12	0.094	1	1.2766	0
Nfkb1	0.337229	0.0694499	0.12	0.094	1	1.2766	0
Zfp560	0.0963711	0.102457	0.254	0.199	1	1.27638	0
Slc35e3	0.175535	0.0476765	0.254	0.199	1	1.27638	0
Erich3	0.169375	0.0994198	0.194	0.152	1	1.27632	0
Commd7	0.196299	0.074758	0.194	0.152	1	1.27632	0
Rps6ka6	0.265912	0.0752305	0.134	0.105	1	1.27619	0
Plcb4	0.00279408	0.274064	0.421	0.33	1	1.27576	0
Rab8b	0.133357	0.11513	0.227	0.178	1	1.27528	0
Ppdpf	0.0218995	0.140671	0.394	0.309	1	1.27508	0
Znhit6	0.231121	0.0908046	0.153	0.12	1	1.275	0
Trps1	0.193435	0.0669734	0.167	0.131	1	1.27481	0
Camkv	0.0401385	0.202494	0.353	0.277	1	1.27437	0
Cklf	0.241341	0.106398	0.14	0.11	1	1.27273	0
Dtymk	0.262466	0.0799597	0.14	0.11	1	1.27273	0
Islr2	0.285102	0.117947	0.126	0.099	1	1.27273	0
Aldh7a1	0.303928	0.0363446	0.126	0.099	1	1.27273	0
Dhdds	0.159861	0.113465	0.187	0.147	1	1.27211	0
Hint3	0.187064	0.101899	0.187	0.147	1	1.27211	0
AU040320	0.261879	0.0558962	0.173	0.136	1	1.27206	0
Ring1	0.0176717	0.281467	0.379	0.298	1	1.27181	0
Arsb	0.0219886	0.211862	0.333	0.262	1	1.27099	0
Ccnl2	0.0100529	0.257618	0.432	0.34	1	1.27059	0
Gprin1	0.153002	0.0869826	0.193	0.152	1	1.26974	0
Papd7	0.160626	0.108314	0.193	0.152	1	1.26974	0
Gpr83	0.283644	0.17574	0.113	0.089	1	1.26966	0
Jtb	0.0379776	0.113561	0.359	0.283	1	1.26855	0
Hlf	0.0344371	0.190911	0.345	0.272	1	1.26838	0
Psmd9	0.0677096	0.173053	0.265	0.209	1	1.26794	0
Pspc1	0.197006	0.104509	0.166	0.131	1	1.26718	0
Copz1	0.0747746	0.14507	0.299	0.236	1	1.26695	0
Stk4	0.278549	0.0416347	0.133	0.105	1	1.26667	0
Gda	0.00365333	0.294547	0.404	0.319	1	1.26646	0
Dgkh	0.0781318	0.186969	0.252	0.199	1	1.26633	0
Gnl2	0.101195	0.165161	0.238	0.188	1	1.26596	0
Pcnx	0.197819	0.0815741	0.205	0.162	1	1.26543	0
Thoc3	0.26158	0.0171137	0.205	0.162	1	1.26543	0
Pcdh10	0.000341433	0.181781	0.636	0.503	1	1.26441	0
Zfp462	0.00433658	0.220152	0.45	0.356	1	1.26404	0
Kmt5a	0.278661	0.0502673	0.139	0.11	1	1.26364	0
Zfp26	0.294286	0.0520324	0.139	0.11	1	1.26364	0
Os9	0.0455825	0.209889	0.298	0.236	1	1.26271	0
Foxred1	0.288345	0.0690504	0.125	0.099	1	1.26263	0
Usp21	0.364378	0.0549307	0.125	0.099	1	1.26263	0
Armcx5	0.2386	0.0291556	0.178	0.141	1	1.26241	0
Fcho2	0.215229	0.0658438	0.212	0.168	1	1.2619	0
Zswim9	0.360817	0.0258219	0.106	0.084	1	1.2619	0
Ccdc148	0.134626	0.102443	0.198	0.157	1	1.26115	0
Abcd3	0.0833918	0.070151	0.31	0.246	1	1.26016	0
Il1rapl1	0.104204	0.210964	0.218	0.173	1	1.26012	0
Btbd11	0.17386	0.0327744	0.257	0.204	1	1.2598	0
Rtca	0.19745	0.0918605	0.165	0.131	1	1.25954	0
Galnt13	0.128013	0.138354	0.297	0.236	1	1.25847	0
Ppan	0.362873	0.0435975	0.112	0.089	1	1.25843	0
Scfd1	0.072751	0.206993	0.263	0.209	1	1.25837	0
Pdk1	0.0940266	0.161688	0.244	0.194	1	1.25773	0
Sdhaf2	0.257482	0.102166	0.171	0.136	1	1.25735	0
Hars2	0.319641	0.0422362	0.132	0.105	1	1.25714	0
Ppp1r16a	0.190587	0.0846763	0.191	0.152	1	1.25658	0
Trim46	0.186255	0.0699986	0.211	0.168	1	1.25595	0
Mpp3	0.323274	0.0588537	0.118	0.094	1	1.25532	0
Etfb	0.355695	0.0514603	0.118	0.094	1	1.25532	0
Myo10	0.27954	0.0859022	0.144	0.115	1	1.25217	0
Rab15	0.0665309	0.121938	0.308	0.246	1	1.25203	0
Lrrtm4	0.302999	0.0393827	0.164	0.131	1	1.25191	0
Epm2a	0.315661	0.0183449	0.164	0.131	1	1.25191	0
Lrrfip1	0.211413	0.0906562	0.184	0.147	1	1.2517	0
Klhl2	0.116453	0.11721	0.275	0.22	1	1.25	0
Tppp3	0.174223	0.0445782	0.235	0.188	1	1.25	0
Ccdc84	0.216023	0.183862	0.15	0.12	1	1.25	0
Polr1a	0.279879	0.0526497	0.15	0.12	1	1.25	0
Rps6ka3	0.35889	0.0498025	0.105	0.084	1	1.25	0
BC051226	0.364464	0.0683112	0.105	0.084	1	1.25	0
Mcmbp	0.199176	0.110637	0.196	0.157	1	1.24841	0
Kdm2b	0.209979	0.096221	0.176	0.141	1	1.24823	0
Cpne4	0.219233	0.146432	0.176	0.141	1	1.24823	0
Fbxl3	0.256736	0.0606929	0.176	0.141	1	1.24823	0
Tdrp	0.387082	0.0288564	0.111	0.089	1	1.24719	0
Tmem35a	0.0118085	0.39203	0.333	0.267	1	1.24719	0
Lnpk	0.00345859	0.256013	0.535	0.429	1	1.24709	0
Zfp523	0.211215	0.110093	0.202	0.162	1	1.24691	0
Cxxc5	0.223665	0.0519779	0.202	0.162	1	1.24691	0
Ppp1r10	0.27546	0.00849105	0.202	0.162	1	1.24691	0
Scg2	3.01821e-39	1.07713	0.92	0.738	6.14054e-35	1.24661	78.7756
Lrrtm3	0.0474881	0.203313	0.326	0.262	1	1.24427	0
Lman2l	0.0132548	0.195509	0.475	0.382	1	1.24346	0
Jag2	0.265674	0.0442702	0.169	0.136	1	1.24265	0
Fh1	0.344314	0.0909745	0.123	0.099	1	1.24242	0
Hrh3	0.155531	0.124431	0.195	0.157	1	1.24204	0
N6amt1	0.209293	0.0786697	0.195	0.157	1	1.24204	0
Tex9	0.29802	0.0784532	0.149	0.12	1	1.24167	0
Dnmt1	0.302847	0.0713129	0.149	0.12	1	1.24167	0
Prr7	0.117155	0.161666	0.221	0.178	1	1.24157	0
Pomgnt2	0.164008	0.124238	0.221	0.178	1	1.24157	0
Gpr45	0.211078	0.144924	0.175	0.141	1	1.24113	0
Rwdd2a	0.28383	0.0788877	0.175	0.141	1	1.24113	0
Ampd2	0.063443	0.174026	0.325	0.262	1	1.24046	0
Zfp275	0.202732	0.0921039	0.253	0.204	1	1.2402	0
Uqcc3	0.0859623	0.13012	0.279	0.225	1	1.24	0
Nsrp1	0.170264	0.0958491	0.259	0.209	1	1.23923	0
Sgsm1	0.00504258	0.209356	0.513	0.414	1	1.23913	0
Gm44644	2.67619e-07	0.407789	0.707	0.571	0.00544471	1.23818	5.21311
Polr3d	0.369912	0.0723265	0.13	0.105	1	1.2381	0
Smim8	0.393626	0.0463078	0.104	0.084	1	1.2381	0
Cebpzos	0.12106	0.1359	0.292	0.236	1	1.23729	0
Tmem87b	0.157315	0.175151	0.214	0.173	1	1.23699	0
Pla2g12a	0.0968922	0.170654	0.272	0.22	1	1.23636	0
Khsrp	0.28751	0.0767407	0.136	0.11	1	1.23636	0
Tub	7.20152e-05	0.277137	0.588	0.476	1	1.23529	0
Mblac2	0.0401274	0.15859	0.368	0.298	1	1.2349	0
Frs2	0.351965	0.0613463	0.142	0.115	1	1.23478	0
Vma21	0.0257972	0.200766	0.427	0.346	1	1.2341	0
Pias3	0.345327	0.106446	0.116	0.094	1	1.23404	0
Zkscan2	0.409088	0.0501419	0.116	0.094	1	1.23404	0
Mbp	0.0278584	0.220349	0.387	0.314	1	1.23248	0
Zfp597	0.36298	0.0434002	0.122	0.099	1	1.23232	0
Parvb	0.378505	0.069724	0.122	0.099	1	1.23232	0
Rasgrf2	0.00206461	0.274612	0.496	0.403	1	1.23077	0
Usp50	0.0765905	0.179666	0.283	0.23	1	1.23043	0
Prrc2a	0.102156	0.0936686	0.406	0.33	1	1.2303	0
Zfp871	0.294917	0.0347706	0.187	0.152	1	1.23026	0
Klhdc8b	0.131836	0.148471	0.225	0.183	1	1.22951	0
Smarca1	0.0579146	0.1533	0.322	0.262	1	1.22901	0
Ssr3	0.000345674	0.30926	0.553	0.45	1	1.22889	0
Txlna	0.334841	0.0901622	0.129	0.105	1	1.22857	0
Fbxw9	0.355068	0.0882231	0.129	0.105	1	1.22857	0
Cope	0.110068	0.150665	0.296	0.241	1	1.22822	0
Csnk2a2	0.116035	0.124004	0.296	0.241	1	1.22822	0
Hs2st1	0.0498531	0.188025	0.34	0.277	1	1.22744	0
Prpf6	0.353134	0.0341859	0.173	0.141	1	1.22695	0
Pcdh7	0.00030442	0.360761	0.558	0.455	1	1.22637	0
Pdrg1	0.175394	0.163053	0.206	0.168	1	1.22619	0
Pls3	0.201612	0.0923015	0.206	0.168	1	1.22619	0
Miip	0.371621	0.12245	0.103	0.084	1	1.22619	0
Lig3	0.386877	0.0736966	0.103	0.084	1	1.22619	0
Hacd2	0.423277	0.0184138	0.103	0.084	1	1.22619	0
Slc30a7	0.429485	0.0437886	0.103	0.084	1	1.22619	0
Arfip1	0.437463	0.0267056	0.103	0.084	1	1.22619	0
Sptbn2	0.202157	0.105011	0.212	0.173	1	1.22543	0
Ydjc	0.30976	0.0939161	0.147	0.12	1	1.225	0
Washc4	0.178174	0.086294	0.224	0.183	1	1.22404	0
Ptpn12	0.225149	0.0933304	0.186	0.152	1	1.22368	0
Cpsf2	0.275954	0.0483958	0.186	0.152	1	1.22368	0
Hps1	0.318901	0.149512	0.115	0.094	1	1.2234	0
Coro7	0.343822	0.107375	0.115	0.094	1	1.2234	0
Zfp950	0.0364398	0.167793	0.455	0.372	1	1.22312	0
Galnt16	0.000549144	0.326139	0.532	0.435	1	1.22299	0
Baiap3	2.96787e-06	0.321487	0.698	0.571	0.0603813	1.22242	2.80708
Gm12027	0.286523	0.208554	0.121	0.099	1	1.22222	0
L2hgdh	0.293834	0.078308	0.154	0.126	1	1.22222	0
Cdk7	0.43051	0.0114456	0.121	0.099	1	1.22222	0
Psmd8	0.289149	0.0858266	0.16	0.131	1	1.22137	0
Rmi1	0.2872	0.0874404	0.166	0.136	1	1.22059	0
Diaph1	0.369671	0.0062781	0.166	0.136	1	1.22059	0
Cers5	0.223091	0.111916	0.211	0.173	1	1.21965	0
Fsd1l	0.09199	0.154846	0.306	0.251	1	1.21912	0
Cop1	0.219994	0.0459565	0.268	0.22	1	1.21818	0
Cgrrf1	0.360197	0.0750032	0.134	0.11	1	1.21818	0
Mrpl40	0.403912	0.0341844	0.134	0.11	1	1.21818	0
Dbp	0.209331	0.101442	0.229	0.188	1	1.21809	0
Tspoap1	0.0689433	0.216683	0.313	0.257	1	1.2179	0
Syt14	0.348128	0.0551335	0.146	0.12	1	1.21667	0
N4bp2l1	0.187121	0.0624266	0.236	0.194	1	1.21649	0
Zfp365	0.0656077	0.123288	0.356	0.293	1	1.21502	0
Pex7	0.329909	0.0571988	0.153	0.126	1	1.21429	0
E330009J07Rik	0.438585	0.0275547	0.102	0.084	1	1.21429	0
Sft2d1	0.187017	0.100554	0.261	0.215	1	1.21395	0
Limd2	0.198125	0.0663633	0.21	0.173	1	1.21387	0
Slc30a1	0.303736	0.055267	0.159	0.131	1	1.21374	0
Sntg1	0.325102	0.103473	0.159	0.131	1	1.21374	0
Usp27x	0.381535	0.0366774	0.159	0.131	1	1.21374	0
Rabl2	0.23126	0.11	0.216	0.178	1	1.21348	0
Pycrl	0.396079	0.0751057	0.114	0.094	1	1.21277	0
Zbtb11os1	0.42842	0.0276897	0.114	0.094	1	1.21277	0
Sac3d1	0.383837	0.0384005	0.12	0.099	1	1.21212	0
Rrbp1	0.17259	0.106312	0.286	0.236	1	1.21186	0
Ylpm1	0.0360481	0.190442	0.412	0.34	1	1.21176	0
Dpy19l4	0.13985	0.131353	0.298	0.246	1	1.21138	0
Srsf12	0.179065	0.110243	0.235	0.194	1	1.21134	0
Mad2l2	0.358584	0.0682956	0.127	0.105	1	1.20952	0
Cfap20	0.0898159	0.15586	0.266	0.22	1	1.20909	0
Tomm34	0.167557	0.102506	0.266	0.22	1	1.20909	0
Rae1	0.416496	0.0625439	0.133	0.11	1	1.20909	0
Fam50a	0.349868	0.0994257	0.139	0.115	1	1.2087	0
Stx5a	0.121377	0.131749	0.354	0.293	1	1.20819	0
Cntnap2	0.000186181	0.261911	0.569	0.471	1	1.20807	0
Ncam2	0.250077	0.0599089	0.227	0.188	1	1.20745	0
Synrg	0.054608	0.152087	0.373	0.309	1	1.20712	0
Usp37	0.347527	0.0339474	0.152	0.126	1	1.20635	0
Ubr5	0.117652	0.106272	0.31	0.257	1	1.20623	0
Fyn	0.0705136	0.164844	0.316	0.262	1	1.20611	0
Mark3	0.0969288	0.133806	0.316	0.262	1	1.20611	0
Chid1	0.190099	0.119195	0.252	0.209	1	1.20574	0
Celf5	1.25086e-05	0.360484	0.606	0.503	0.254487	1.20477	1.36851
Rnf25	0.280286	0.0886342	0.177	0.147	1	1.20408	0
Exosc9	0.468916	0.0381091	0.101	0.084	1	1.20238	0
Vkorc1	0.496686	0.0158878	0.101	0.084	1	1.20238	0
Dpysl3	0.156089	0.106883	0.239	0.199	1	1.20101	0
Nudcd2	0.236299	0.0920028	0.239	0.199	1	1.20101	0
Fam189b	0.357786	0.0893595	0.144	0.12	1	1.2	0
Ccdc43	0.362617	0.0235242	0.144	0.12	1	1.2	0
Acap3	0.38205	0.0682694	0.132	0.11	1	1.2	0
Chmp1b	0.388123	0.0456164	0.126	0.105	1	1.2	0
Rbm10	0.39621	0.065303	0.126	0.105	1	1.2	0
Cxxc1	0.438669	0.0296092	0.126	0.105	1	1.2	0
Fgfr1	0.00176859	0.576794	0.421	0.351	1	1.19943	0
Dcp2	0.139859	0.0934206	0.289	0.241	1	1.19917	0
Zfyve27	0.184721	0.0868258	0.289	0.241	1	1.19917	0
Mtus1	0.319648	0.0538575	0.169	0.141	1	1.19858	0
Smad1	0.334333	0.0289935	0.169	0.141	1	1.19858	0
Cpne2	0.110592	0.150265	0.32	0.267	1	1.1985	0
Zfand2a	0.333067	0.0559248	0.157	0.131	1	1.19847	0
Usp13	0.284071	0.0787739	0.182	0.152	1	1.19737	0
Ap1m1	0.26392	0.113991	0.213	0.178	1	1.19663	0
Bod1l	0.039255	0.162174	0.42	0.351	1	1.19658	0
Uxs1	0.224463	0.0818945	0.207	0.173	1	1.19653	0
Rasl10b	0.310297	0.0487841	0.207	0.173	1	1.19653	0
Cxxc4	0.0520996	0.161473	0.445	0.372	1	1.19624	0
Zdhhc22	0.234321	0.127624	0.263	0.22	1	1.19545	0
Nexmif	0.0744362	0.144006	0.3	0.251	1	1.19522	0
Eef1d	0.105241	0.136128	0.282	0.236	1	1.19492	0
Plppr4	2.86841e-06	0.338012	0.688	0.576	0.0583578	1.19444	2.84116
M6pr	0.0616945	0.153692	0.381	0.319	1	1.19436	0
Bex4	0.20583	0.0733521	0.375	0.314	1	1.19427	0
Mlec	0.0487286	0.168138	0.437	0.366	1	1.19399	0
Sf3a1	0.253648	0.0848394	0.224	0.188	1	1.19149	0
Zdhhc4	0.432765	0.111069	0.112	0.094	1	1.19149	0
Rfx1	0.434684	0.101216	0.112	0.094	1	1.19149	0
Eif2d	0.441299	0.12624	0.112	0.094	1	1.19149	0
Kin	0.399192	0.0795372	0.137	0.115	1	1.1913	0
Nras	0.303324	0.0723762	0.162	0.136	1	1.19118	0
Ifnar1	0.378839	0.0487656	0.162	0.136	1	1.19118	0
Tpd52l1	0.344106	0.0669393	0.187	0.157	1	1.19108	0
Nop56	0.000152854	0.364456	0.586	0.492	1	1.19106	0
Akap17b	0.232786	0.112121	0.212	0.178	1	1.19101	0
Gm5617	0.422815	0.0666475	0.106	0.089	1	1.19101	0
Vhl	0.432271	0.0551822	0.106	0.089	1	1.19101	0
Rpf1	0.433952	0.0711474	0.106	0.089	1	1.19101	0
Rbm42	0.493326	0.0157928	0.106	0.089	1	1.19101	0
Lrig2	0.173509	0.186351	0.237	0.199	1	1.19095	0
Tmem258	0.231557	0.12919	0.237	0.199	1	1.19095	0
Ndufaf3	0.136171	0.115425	0.287	0.241	1	1.19087	0
Nup98	0.252977	0.111075	0.231	0.194	1	1.19072	0
Them4	0.35818	0.0754711	0.231	0.194	1	1.19072	0
Ccdc66	0.268507	0.108482	0.2	0.168	1	1.19048	0
Krr1	0.313379	0.0634384	0.2	0.168	1	1.19048	0
2900076A07Rik	0.38211	0.0641297	0.15	0.126	1	1.19048	0
Polr3e	0.42122	0.0593507	0.125	0.105	1	1.19048	0
Plxnc1	0.0265632	0.207934	0.448	0.377	1	1.18833	0
Cdc42se2	0.0863154	0.1357	0.379	0.319	1	1.18809	0
Arpc3	0.12854	0.0963388	0.329	0.277	1	1.18773	0
Celf6	0.00436336	0.205276	0.54	0.455	1	1.18681	0
Adcy5	0.117676	0.172621	0.28	0.236	1	1.18644	0
Khdrbs3	0.263464	0.0511432	0.28	0.236	1	1.18644	0
2810474O19Rik	0.230942	0.111617	0.242	0.204	1	1.18627	0
Eif3b	0.299325	0.0772879	0.242	0.204	1	1.18627	0
Aprt	0.191899	0.103193	0.255	0.215	1	1.18605	0
Celf1	0.000175265	0.256764	0.608	0.513	1	1.18519	0
Nhsl2	0.358153	0.0611908	0.186	0.157	1	1.18471	0
Phf2	0.383859	0.0649265	0.161	0.136	1	1.18382	0
Per3	0.069725	0.234467	0.335	0.283	1	1.18375	0
Mmd	0.011793	0.246684	0.465	0.393	1	1.18321	0
Mrpl49	0.309527	0.117293	0.155	0.131	1	1.18321	0
Setd1a	0.361289	0.0817417	0.155	0.131	1	1.18321	0
Epdr1	0.0328373	0.217713	0.446	0.377	1	1.18302	0
Ctdspl	0.359232	0.102763	0.136	0.115	1	1.18261	0
Xpo6	0.167956	0.144059	0.285	0.241	1	1.18257	0
N4bp2	0.273272	0.0538211	0.266	0.225	1	1.18222	0
Aldh9a1	0.469113	0.0538263	0.13	0.11	1	1.18182	0
Chmp3	0.137674	0.0836455	0.371	0.314	1	1.18153	0
Rsl1d1	0.253484	0.0858446	0.254	0.215	1	1.1814	0
Alg5	0.419174	0.081935	0.124	0.105	1	1.18095	0
Tmem101	0.453989	0.0731987	0.124	0.105	1	1.18095	0
Zfp513	0.48448	0.0897493	0.111	0.094	1	1.18085	0
Ulk1	0.303508	0.0656749	0.21	0.178	1	1.17978	0
Ehd1	0.417383	0.0740796	0.105	0.089	1	1.17978	0
9430060I03Rik	0.49191	0.0494057	0.105	0.089	1	1.17978	0
Creb3	0.501932	0.056118	0.105	0.089	1	1.17978	0
Tekt2	0.50898	0.0951992	0.105	0.089	1	1.17978	0
Dars	0.270083	0.0767022	0.204	0.173	1	1.17919	0
Il6st	0.315041	0.0691719	0.204	0.173	1	1.17919	0
Pcgf3	0.315739	0.0681289	0.204	0.173	1	1.17919	0
Rnft2	0.354775	0.0461308	0.204	0.173	1	1.17919	0
Hdac2	0.123927	0.150259	0.303	0.257	1	1.17899	0
Asb4	0.278995	0.128647	0.198	0.168	1	1.17857	0
Nol11	0.400754	0.003425	0.198	0.168	1	1.17857	0
Mturn	0.269616	0.0731585	0.185	0.157	1	1.17834	0
Rab26os	0.118092	0.140608	0.351	0.298	1	1.17785	0
Mttp	0.0283567	0.241393	0.438	0.372	1	1.17742	0
Nebl	0.192966	0.120216	0.339	0.288	1	1.17708	0
Tbk1	0.397705	0.0605232	0.173	0.147	1	1.17687	0
Proser1	0.186207	0.191643	0.253	0.215	1	1.17674	0
Repin1	0.444196	0.0584085	0.16	0.136	1	1.17647	0
Insig2	0.0970913	0.119115	0.407	0.346	1	1.1763	0
Emc6	0.111594	0.122017	0.394	0.335	1	1.17612	0
Rnf8	0.405414	0.0697028	0.154	0.131	1	1.17557	0
Fgf9	0.431335	0.0524136	0.154	0.131	1	1.17557	0
Gart	0.434671	0.0438707	0.154	0.131	1	1.17557	0
Dgke	0.156201	0.132086	0.295	0.251	1	1.1753	0
Pomk	0.456165	0.0667639	0.141	0.12	1	1.175	0
Coq8b	0.463079	0.0879964	0.141	0.12	1	1.175	0
Cd3eap	0.504146	0.00661056	0.141	0.12	1	1.175	0
Taf9b	0.542296	0.0180495	0.141	0.12	1	1.175	0
Ago2	0.00668194	0.224884	0.479	0.408	1	1.17402	0
Nnat	0.00515868	0.299374	0.608	0.518	1	1.17375	0
Utp15	0.500303	0.0289982	0.129	0.11	1	1.17273	0
Pnoc	0.277681	0.158063	0.197	0.168	1	1.17262	0
Mrps23	0.301145	0.0725577	0.197	0.168	1	1.17262	0
Cnot9	0.476676	0.0594677	0.116	0.099	1	1.17172	0
Lats1	0.527586	0.0292166	0.116	0.099	1	1.17172	0
Mtfp1	0.205042	0.116562	0.239	0.204	1	1.17157	0
Mrpl1	0.430591	0.0823282	0.123	0.105	1	1.17143	0
Sh3gl3	0.235076	0.0720816	0.294	0.251	1	1.17131	0
Banf1	0.358305	0.0471778	0.22	0.188	1	1.17021	0
Fam96a	0.17045	0.138591	0.227	0.194	1	1.1701	0
Ankib1	0.312427	0.0649674	0.227	0.194	1	1.1701	0
Phtf1	0.308787	0.153115	0.172	0.147	1	1.17007	0
Pgd	0.427037	0.0715222	0.172	0.147	1	1.17007	0
Prickle2	0.202759	0.11153	0.276	0.236	1	1.16949	0
Arl6ip6	0.367923	0.0989602	0.159	0.136	1	1.16912	0
Trim35	2.56696e-06	0.342868	0.685	0.586	0.0522248	1.16894	2.9522
Tmem131	0.136254	0.170192	0.263	0.225	1	1.16889	0
Ano6	0.476353	0.0756098	0.104	0.089	1	1.16854	0
Socs4	0.497465	0.0481645	0.104	0.089	1	1.16854	0
Lbhd2	0.499909	0.0506421	0.104	0.089	1	1.16854	0
Cers2	0.417173	0.0326516	0.153	0.131	1	1.16794	0
Sirt7	0.475721	0.056108	0.153	0.131	1	1.16794	0
Btg1	0.0566469	0.237619	0.397	0.34	1	1.16765	0
Capn7	0.253444	0.105163	0.196	0.168	1	1.16667	0
Mysm1	0.417395	0.0353363	0.238	0.204	1	1.16667	0
Dph5	0.430739	0.123586	0.14	0.12	1	1.16667	0
Desi2	0.282441	0.0931962	0.232	0.199	1	1.16583	0
Gm20342	0.338421	0.0848741	0.183	0.157	1	1.16561	0
Acaa1a	0.382675	0.0897978	0.183	0.157	1	1.16561	0
Ccdc39	0.427218	0.0428091	0.183	0.157	1	1.16561	0
Srpr	0.253739	0.132618	0.317	0.272	1	1.16544	0
Zhx3	0.388657	0.0842349	0.134	0.115	1	1.16522	0
Yy1	0.487176	0.0395447	0.268	0.23	1	1.16522	0
Gosr2	0.186981	0.117308	0.262	0.225	1	1.16444	0
Sgpp1	0.176921	0.0805694	0.39	0.335	1	1.16418	0
Src	0.416227	0.0825915	0.171	0.147	1	1.16327	0
D430042O09Rik	0.238705	0.129826	0.243	0.209	1	1.16268	0
Mxd4	0.304452	0.0694025	0.243	0.209	1	1.16268	0
Dnal1	0.250325	0.087328	0.286	0.246	1	1.1626	0
Gnptg	0.157072	0.146511	0.329	0.283	1	1.16254	0
Orc2	0.503369	0.0736577	0.122	0.105	1	1.1619	0
Inpp5e	0.544721	0.0442524	0.122	0.105	1	1.1619	0
Wdr12	0.283728	0.115525	0.201	0.173	1	1.16185	0
Cox19	0.40647	0.0438366	0.201	0.173	1	1.16185	0
Tmem8b	0.240475	0.11179	0.28	0.241	1	1.16183	0
Parp1	0.519826	0.0661261	0.115	0.099	1	1.16162	0
Idh1	0.334088	0.0917183	0.195	0.168	1	1.16071	0
Ankrd50	0.39223	0.0375803	0.195	0.168	1	1.16071	0
Eftud2	0.430493	0.0503793	0.195	0.168	1	1.16071	0
Cirbp	0.109543	0.123472	0.419	0.361	1	1.16066	0
Ftx	0.36087	0.0669794	0.188	0.162	1	1.16049	0
Lrrc7	0.141194	0.193428	0.304	0.262	1	1.16031	0
Mrps6	0.479761	0.0277396	0.152	0.131	1	1.16031	0
Zdhhc2	0.0738824	0.141395	0.449	0.387	1	1.16021	0
Gm26724	0.262385	0.168006	0.261	0.225	1	1.16	0
Ercc6l2	0.553142	0.0582122	0.109	0.094	1	1.15957	0
Pcyox1l	0.590854	0.0238208	0.109	0.094	1	1.15957	0
Fstl5	0.0379579	0.22676	0.516	0.445	1	1.15955	0
Ormdl3	0.23352	0.0935116	0.298	0.257	1	1.15953	0
Snx6	0.346167	0.0854544	0.182	0.157	1	1.15924	0
Papss1	0.423505	0.0308033	0.182	0.157	1	1.15924	0
Gm13830	0.43601	0.0739546	0.182	0.157	1	1.15924	0
Caml	0.453284	0.00242649	0.212	0.183	1	1.15847	0
Arhgap33	0.369712	0.109349	0.176	0.152	1	1.15789	0
Zfp788	0.385477	0.0364551	0.176	0.152	1	1.15789	0
Aplp1	7.56552e-09	0.394791	0.794	0.686	0.000153921	1.15743	8.77907
Tmie	0.211188	0.12669	0.309	0.267	1	1.1573	0
Rhou	0.48357	0.0678579	0.103	0.089	1	1.1573	0
AI987944	0.537581	0.0654746	0.103	0.089	1	1.1573	0
Dync2h1	0.142352	0.17957	0.339	0.293	1	1.157	0
Wdr77	0.179696	0.135416	0.236	0.204	1	1.15686	0
Prkcsh	0.228434	0.129679	0.273	0.236	1	1.15678	0
H2afj	0.187883	0.138965	0.266	0.23	1	1.15652	0
Psen2	0.51387	0.0693328	0.133	0.115	1	1.15652	0
Carmil2	0.425167	0.0551238	0.17	0.147	1	1.15646	0
Relt	0.368977	0.118516	0.163	0.141	1	1.15603	0
Nadk	0.520978	0.0786462	0.127	0.11	1	1.15455	0
B3galt2	0.479809	0.0494534	0.157	0.136	1	1.15441	0
Gns	0.0879292	0.192126	0.368	0.319	1	1.15361	0
Nptxr	0.00668014	0.216527	0.61	0.529	1	1.15312	0
Mtg2	0.405437	0.0924685	0.151	0.131	1	1.15267	0
2610037D02Rik	0.483069	0.0220612	0.151	0.131	1	1.15267	0
Psmg4	0.587048	0.000599721	0.121	0.105	1	1.15238	0
Cenpx	0.331938	0.0711696	0.205	0.178	1	1.15169	0
Med23	0.526422	0.045196	0.114	0.099	1	1.15152	0
Tmem167b	0.418305	0.0531765	0.175	0.152	1	1.15132	0
P3h3	0.332537	0.113526	0.259	0.225	1	1.15111	0
Cdc37l1	0.055262	0.181199	0.458	0.398	1	1.15075	0
Zfp207	0.0435266	0.203145	0.469	0.408	1	1.14951	0
Gm45159	0.4355	0.133416	0.162	0.141	1	1.14894	0
Xrn2	0.477264	0.0602484	0.162	0.141	1	1.14894	0
Thumpd3	0.642405	0.0315436	0.108	0.094	1	1.14894	0
Herc3	0.0526853	0.183251	0.409	0.356	1	1.14888	0
4930447C04Rik	0.415565	0.0578892	0.193	0.168	1	1.14881	0
Fibp	0.385449	0.0509443	0.186	0.162	1	1.14815	0
Gclc	0.207723	0.131889	0.264	0.23	1	1.14783	0
Adck5	0.457492	0.116432	0.132	0.115	1	1.14783	0
Agfg2	0.573893	0.0435694	0.132	0.115	1	1.14783	0
Etf1	0.284846	0.0816404	0.288	0.251	1	1.14741	0
Med8	0.476334	0.034839	0.156	0.136	1	1.14706	0
Jpt1	0.133389	0.0990466	0.414	0.361	1	1.14681	0
Cacna1e	0.0338572	0.167865	0.516	0.45	1	1.14667	0
Tab2	0.263317	0.0807165	0.258	0.225	1	1.14667	0
Rbmxl1	0.36772	0.0680394	0.18	0.157	1	1.1465	0
Hadhb	0.436538	0.0861492	0.18	0.157	1	1.1465	0
2410131K14Rik	0.565399	0.0430725	0.102	0.089	1	1.14607	0
Ralgps2	0.0869001	0.22984	0.33	0.288	1	1.14583	0
Luc7l	0.220774	0.113724	0.33	0.288	1	1.14583	0
Exosc1	0.475711	0.0482873	0.126	0.11	1	1.14545	0
Rapgefl1	0.559758	0.039607	0.126	0.11	1	1.14545	0
Sf3b3	0.115516	0.145627	0.402	0.351	1	1.1453	0
Znrf1	0.209009	0.0910299	0.324	0.283	1	1.14488	0
Psmb3	0.254774	0.131641	0.222	0.194	1	1.14433	0
Pard3	0.3218	0.0904213	0.222	0.194	1	1.14433	0
Gabra4	0.416649	0.0571384	0.222	0.194	1	1.14433	0
Pgap1	0.0634815	0.126767	0.563	0.492	1	1.14431	0
Hap1	2.43718e-12	0.392768	0.833	0.728	4.95844e-08	1.14423	16.8196
Zmiz2	0.233847	0.0849537	0.294	0.257	1	1.14397	0
Celf3	0.0349238	0.173199	0.533	0.466	1	1.14378	0
Rundc3b	0.458227	0.0579713	0.239	0.209	1	1.14354	0
Tubb4b	0.316053	0.0706363	0.263	0.23	1	1.14348	0
Sec61b	0.0239527	0.229424	0.455	0.398	1	1.14322	0
Ptpru	0.400746	0.110495	0.144	0.126	1	1.14286	0
Gopc	0.403616	0.0499733	0.192	0.168	1	1.14286	0
Bcar1	0.496035	0.0451235	0.144	0.126	1	1.14286	0
Crls1	0.514561	0.039033	0.144	0.126	1	1.14286	0
Dgat2	0.52152	0.0654502	0.12	0.105	1	1.14286	0
Phrf1	0.533777	0.043594	0.12	0.105	1	1.14286	0
9130401M01Rik	0.558264	0.0274319	0.12	0.105	1	1.14286	0
Tacc1	0.0938657	0.13287	0.377	0.33	1	1.14242	0
Cdc23	0.449985	0.0608937	0.185	0.162	1	1.14198	0
Rcan1	0.522239	0.012558	0.185	0.162	1	1.14198	0
Prpsap2	0.54522	0.0158655	0.161	0.141	1	1.14184	0
Faf1	0.415035	0.0962558	0.137	0.12	1	1.14167	0
Ercc5	0.601142	0.0350062	0.113	0.099	1	1.14141	0
Lin7a	0.335337	0.0779126	0.275	0.241	1	1.14108	0
Ybx1	0.0227205	0.231609	0.478	0.419	1	1.14081	0
Eif3d	0.382059	0.096039	0.203	0.178	1	1.14045	0
Tnik	0.00296103	0.212766	0.627	0.55	1	1.14	0
Hdac1	0.458888	0.0544905	0.155	0.136	1	1.13971	0
Slc7a6os	0.495311	0.0673685	0.155	0.136	1	1.13971	0
Slc24a5	0.0760071	0.148838	0.555	0.487	1	1.13963	0
Ocrl	0.0959333	0.166816	0.441	0.387	1	1.13953	0
Dbpht2	0.0538783	0.17692	0.507	0.445	1	1.13933	0
Izumo4	0.197772	0.217769	0.262	0.23	1	1.13913	0
Gpr61	0.54365	0.0553721	0.131	0.115	1	1.13913	0
Dido1	0.331231	0.108461	0.238	0.209	1	1.13876	0
Riok3	0.418645	0.0650323	0.197	0.173	1	1.13873	0
Fut8	0.132831	0.19701	0.37	0.325	1	1.13846	0
Dtx1	0.228761	0.0787293	0.28	0.246	1	1.13821	0
Arpc5	0.117433	0.10954	0.429	0.377	1	1.13793	0
Med13	0.230759	0.114977	0.274	0.241	1	1.13693	0
Ssbp4	0.002432	0.324547	0.541	0.476	1	1.13655	0
Hibch	0.520867	0.0575865	0.125	0.11	1	1.13636	0
Arid1b	0.448739	0.0206144	0.226	0.199	1	1.13568	0
R3hdm1	0.000157944	0.307124	0.696	0.613	1	1.1354	0
Adam10	0.238661	0.140308	0.338	0.298	1	1.13423	0
Negr1	9.78685e-07	0.316476	0.82	0.723	0.0199113	1.13416	3.91647
Kdm6b	0.207495	0.199035	0.255	0.225	1	1.13333	0
Nsmf	0.330967	0.0961203	0.255	0.225	1	1.13333	0
Gtf3c6	0.488406	0.0868712	0.136	0.12	1	1.13333	0
Dimt1	0.491357	0.118084	0.136	0.12	1	1.13333	0
Dhx57	0.558344	0.0259821	0.136	0.12	1	1.13333	0
Scyl1	0.615909	0.032401	0.136	0.12	1	1.13333	0
Adgrg1	0.414253	0.026379	0.231	0.204	1	1.13235	0
Stat3	0.495623	0.0517456	0.154	0.136	1	1.13235	0
Cdc16	0.504636	0.0814941	0.154	0.136	1	1.13235	0
Cpne6	0.539923	0.0388706	0.154	0.136	1	1.13235	0
Trim41	0.56334	0.0149214	0.154	0.136	1	1.13235	0
Plec	0.596475	0.00618589	0.154	0.136	1	1.13235	0
Dlg1	0.163833	0.151805	0.326	0.288	1	1.13194	0
Pitpnm1	0.344312	0.0826076	0.326	0.288	1	1.13194	0
Pnma2	0.15724	0.100292	0.361	0.319	1	1.13166	0
Rac3	0.2417	0.0941612	0.344	0.304	1	1.13158	0
Eef1akmt1	0.623279	0.0218403	0.112	0.099	1	1.13131	0
Lsm3	0.417864	0.100765	0.207	0.183	1	1.13115	0
Prpf31	0.359066	0.0955056	0.19	0.168	1	1.13095	0
Syt9	0.52024	0.0582559	0.13	0.115	1	1.13043	0
Zfp62	0.531903	0.0872691	0.13	0.115	1	1.13043	0
Pnck	0.0336365	0.165429	0.503	0.445	1	1.13034	0
Bcl9	0.0569098	0.188563	0.408	0.361	1	1.13019	0
Tcf4	0.286389	0.0258489	0.408	0.361	1	1.13019	0
Neo1	0.206011	0.142455	0.313	0.277	1	1.12996	0
Hspa5	0.00326678	0.301716	0.609	0.539	1	1.12987	0
Ikzf4	0.556271	0.0470966	0.183	0.162	1	1.12963	0
Snn	0.242151	0.0833138	0.349	0.309	1	1.12945	0
Fam135a	0.51155	0.0292322	0.166	0.147	1	1.12925	0
Add3	0.402823	0.0557242	0.201	0.178	1	1.12921	0
Tmed8	0.307178	0.0829242	0.307	0.272	1	1.12868	0
Cntnap5a	0.144861	0.20526	0.36	0.319	1	1.12853	0
Amer2	0.177891	0.124159	0.36	0.319	1	1.12853	0
Cript	0.347297	0.0672455	0.325	0.288	1	1.12847	0
Tmem248	0.221101	0.138481	0.29	0.257	1	1.1284	0
Orc4	0.342237	0.151211	0.212	0.188	1	1.12766	0
Ripor1	0.457528	0.0988295	0.159	0.141	1	1.12766	0
Wrnip1	0.47459	0.0161639	0.212	0.188	1	1.12766	0
Taf2	0.586517	0.029462	0.159	0.141	1	1.12766	0
Babam2	0.603962	0.0618896	0.106	0.094	1	1.12766	0
Abcc5	0.150051	0.197814	0.407	0.361	1	1.12742	0
Nucb2	0.50713	0.101393	0.177	0.157	1	1.12739	0
Comtd1	0.643023	0.0163507	0.124	0.11	1	1.12727	0
6030458C11Rik	0.416986	0.104354	0.195	0.173	1	1.12717	0
Nmd3	0.449785	0.0891453	0.195	0.173	1	1.12717	0
Gskip	0.368492	0.0629237	0.266	0.236	1	1.12712	0
Apbb2	0.270577	0.114466	0.306	0.272	1	1.125	0
1810030O07Rik	0.526562	0.0536969	0.135	0.12	1	1.125	0
Tdg	0.558329	0.049839	0.135	0.12	1	1.125	0
Yeats4	0.461893	0.0445998	0.235	0.209	1	1.1244	0
Cyld	0.0344415	0.186291	0.453	0.403	1	1.12407	0
Arhgap39	0.362647	0.121059	0.218	0.194	1	1.12371	0
Pld3	0.000443023	0.347427	0.6	0.534	1	1.1236	0
Vat1	0.00359921	0.187173	0.6	0.534	1	1.1236	0
Kdelr1	0.314247	0.106003	0.3	0.267	1	1.1236	0
Ctdnep1	0.541183	0.0240354	0.2	0.178	1	1.1236	0
Klhl29	0.545653	0.0301138	0.2	0.178	1	1.1236	0
Rab9b	0.103272	0.118097	0.447	0.398	1	1.12312	0
Tsen34	0.558017	0.0157835	0.229	0.204	1	1.12255	0
Pik3c2a	0.48623	0.0624973	0.165	0.147	1	1.12245	0
Hcn1	0.131132	0.180542	0.358	0.319	1	1.12226	0
Ube2w	0.24352	0.113986	0.358	0.319	1	1.12226	0
Hipk3	0.370057	0.046915	0.294	0.262	1	1.12214	0
Zcchc10	0.526379	0.0315744	0.147	0.131	1	1.12214	0
Otud4	0.577101	0.0438059	0.147	0.131	1	1.12214	0
Man1a2	0.257285	0.145853	0.388	0.346	1	1.12139	0
Ubxn2b	0.380716	0.0749329	0.194	0.173	1	1.12139	0
1810058I24Rik	0.460923	0.0625596	0.194	0.173	1	1.12139	0
Etfdh	0.605923	0.0664587	0.111	0.099	1	1.12121	0
Hmbs	0.611476	0.0950051	0.111	0.099	1	1.12121	0
Zzz3	0.466511	0.0755739	0.223	0.199	1	1.1206	0
Gabra3	0.0313279	0.232419	0.475	0.424	1	1.12028	0
Dnal4	0.497378	0.0823393	0.205	0.183	1	1.12022	0
Rab22a	0.548335	0.0300454	0.205	0.183	1	1.12022	0
Nr2c2	0.284114	0.110909	0.317	0.283	1	1.12014	0
Nell1	0.359166	0.0382609	0.299	0.267	1	1.11985	0
Pam	0.0143738	0.392153	0.533	0.476	1	1.11975	0
Cadm1	6.50403e-07	0.27045	0.879	0.785	0.0132324	1.11975	4.32508
1810043G02Rik	0.396455	0.0947572	0.234	0.209	1	1.11962	0
Ece1	0.447181	0.0929838	0.234	0.209	1	1.11962	0
Elovl5	0.479329	0.0377574	0.234	0.209	1	1.11962	0
Ahdc1	0.275516	0.0734798	0.31	0.277	1	1.11913	0
Mast2	0.428547	0.0642546	0.188	0.168	1	1.11905	0
Tomm6	0.537183	0.0419702	0.141	0.126	1	1.11905	0
Sumf1	0.542188	0.0813503	0.141	0.126	1	1.11905	0
Commd8	0.365368	0.0460824	0.264	0.236	1	1.11864	0
Mydgf	0.486141	0.0144595	0.264	0.236	1	1.11864	0
Amy1	0.366417	0.126271	0.217	0.194	1	1.11856	0
Pafah1b3	0.560174	0.00707166	0.217	0.194	1	1.11856	0
Jakmip1	0.342268	0.0815755	0.387	0.346	1	1.1185	0
Rasa2	0.438875	0.131522	0.17	0.152	1	1.11842	0
Gm16105	0.440486	0.150113	0.17	0.152	1	1.11842	0
Ric1	0.540892	0.0827089	0.123	0.11	1	1.11818	0
Pde10a	0.146797	0.203818	0.322	0.288	1	1.11806	0
Ube3c	0.273946	0.123585	0.322	0.288	1	1.11806	0
Agap1	0.198458	0.100634	0.398	0.356	1	1.11798	0
Gm5914	0.670755	0.00562717	0.152	0.136	1	1.11765	0
Glul	0.445677	0.0569789	0.257	0.23	1	1.11739	0
Pacs1	0.631076	0.0278241	0.181	0.162	1	1.11728	0
Pag1	0.570176	0.059554	0.105	0.094	1	1.11702	0
Mettl7a1	0.629923	0.0252962	0.105	0.094	1	1.11702	0
Dpm2	0.185233	0.163616	0.363	0.325	1	1.11692	0
Clu	0.239494	0.166793	0.363	0.325	1	1.11692	0
Snw1	0.401985	0.0626738	0.269	0.241	1	1.11618	0
Erc1	0.329612	0.10942	0.298	0.267	1	1.1161	0
Gm26699	0.00552904	0.377151	0.625	0.56	1	1.11607	0
Ccdc28a	0.575115	0.0547459	0.164	0.147	1	1.11565	0
Mboat2	0.381203	0.129748	0.193	0.173	1	1.11561	0
Syvn1	0.613612	0.0154919	0.193	0.173	1	1.11561	0
Tram1	0.357798	0.110523	0.28	0.251	1	1.11554	0
Gpr85	0.217336	0.119893	0.368	0.33	1	1.11515	0
Sike1	0.591209	0.0378904	0.204	0.183	1	1.11475	0
Ergic3	0.0662452	0.192282	0.467	0.419	1	1.11456	0
Hnrnpab	0.121274	0.113498	0.438	0.393	1	1.1145	0
Luzp2	0.32285	0.0825115	0.292	0.262	1	1.1145	0
H3f3a	0.0270699	0.192058	0.537	0.482	1	1.11411	0
Parn	0.564265	0.0227273	0.157	0.141	1	1.11348	0
Ilkap	0.509734	0.0525571	0.216	0.194	1	1.1134	0
Ints2	0.588522	0.0220457	0.187	0.168	1	1.1131	0
Tmem64	0.527251	0.0124802	0.256	0.23	1	1.11304	0
Mier1	0.452143	0.0328423	0.286	0.257	1	1.11284	0
Fam20b	0.171575	0.151785	0.385	0.346	1	1.11272	0
Ino80d	0.208277	0.175978	0.326	0.293	1	1.11263	0
Clip1	0.222957	0.0659752	0.425	0.382	1	1.11257	0
Morn2	0.31286	0.106859	0.297	0.267	1	1.11236	0
Rps27l	0.385393	0.081058	0.297	0.267	1	1.11236	0
Riok1	0.442311	0.136064	0.268	0.241	1	1.11203	0
Etfrf1	0.599696	0.00575168	0.169	0.152	1	1.11184	0
Ptprz1	0.15493	0.223867	0.349	0.314	1	1.11146	0
Ncl	0.272592	0.0861203	0.529	0.476	1	1.11134	0
Rlim	0.154631	0.165681	0.32	0.288	1	1.11111	0
Hipk2	0.404642	0.0772498	0.18	0.162	1	1.11111	0
Wdcp	0.660219	0.014192	0.11	0.099	1	1.11111	0
Krcc1	0.677271	0.0409433	0.11	0.099	1	1.11111	0
C2cd5	0.174966	0.13399	0.401	0.361	1	1.1108	0
Bax	0.266022	0.12821	0.361	0.325	1	1.11077	0
Sos2	0.396952	0.0865494	0.221	0.199	1	1.11055	0
Trim8	0.473025	0.063752	0.221	0.199	1	1.11055	0
Arl2	0.51433	0.031206	0.221	0.199	1	1.11055	0
Lamp1	0.12702	0.183779	0.483	0.435	1	1.11034	0
Tmem80	0.372361	0.131529	0.262	0.236	1	1.11017	0
Sgcb	0.498805	0.0937713	0.232	0.209	1	1.11005	0
Pnn	0.152733	0.121903	0.575	0.518	1	1.11004	0
Hook1	0.156308	0.147313	0.424	0.382	1	1.10995	0
Trmt1l	0.162019	0.208732	0.395	0.356	1	1.10955	0
Tmem94	0.581097	0.0327695	0.163	0.147	1	1.10884	0
Samd8	0.297782	0.0955409	0.377	0.34	1	1.10882	0
Abraxas2	0.35085	0.0971005	0.296	0.267	1	1.10861	0
Parp8	0.598607	0.0661182	0.133	0.12	1	1.10833	0
Slc12a9	0.63421	0.0559917	0.133	0.12	1	1.10833	0
Kmt2b	0.661446	0.0418219	0.133	0.12	1	1.10833	0
Prkag2	0.481081	0.0736444	0.174	0.157	1	1.10828	0
Egfl7	0.594806	0.0331016	0.174	0.157	1	1.10828	0
Tmem251	0.523304	0.0434224	0.215	0.194	1	1.10825	0
Stx3	0.483392	0.0240412	0.226	0.204	1	1.10784	0
Ostc	0.352319	0.0639447	0.36	0.325	1	1.10769	0
Fxyd7	0.492622	0.0841315	0.186	0.168	1	1.10714	0
Mcts1	0.383688	0.113156	0.238	0.215	1	1.10698	0
Amd1	0.517136	0.0648525	0.145	0.131	1	1.10687	0
Ptpra	0.175437	0.148371	0.405	0.366	1	1.10656	0
Wdr34	0.483055	0.0876832	0.208	0.188	1	1.10638	0
Txndc17	0.0563413	0.155364	0.428	0.387	1	1.10594	0
Stag1	0.405097	0.0868419	0.295	0.267	1	1.10487	0
Tug1	0.0955124	0.184203	0.486	0.44	1	1.10455	0
Gphn	0.520964	0.0538699	0.254	0.23	1	1.10435	0
Faap100	0.613316	0.103909	0.127	0.115	1	1.10435	0
Hmgb1	0.0143824	0.178888	0.572	0.518	1	1.10425	0
Chl1	0.0235756	0.23274	0.572	0.518	1	1.10425	0
Phc2	0.648699	0.01736	0.191	0.173	1	1.10405	0
Erp44	0.56993	0.106882	0.139	0.126	1	1.10317	0
Cnpy3	0.353384	0.117842	0.289	0.262	1	1.10305	0
Bcl7b	0.547233	0.0152136	0.237	0.215	1	1.10233	0
Dkc1	0.62126	0.0400028	0.162	0.147	1	1.10204	0
Nol4l	0.511695	0.0818103	0.173	0.157	1	1.10191	0
Blzf1	0.531225	0.0939447	0.173	0.157	1	1.10191	0
Clns1a	0.500118	0.0614533	0.271	0.246	1	1.10163	0
Utp3	0.649155	0.0435647	0.196	0.178	1	1.10112	0
Jmjd1c	0.202763	0.135567	0.415	0.377	1	1.1008	0
Acaca	0.305721	0.109322	0.328	0.298	1	1.10067	0
Ralgds	0.38514	0.11701	0.242	0.22	1	1.1	0
Csnk1d	0.39736	0.0566239	0.363	0.33	1	1.1	0
Irs2	0.399069	0.0687054	0.242	0.22	1	1.1	0
Cnksr2	0.631491	0.0355591	0.132	0.12	1	1.1	0
Cdk2ap1	0.655826	0.04112	0.121	0.11	1	1.1	0
Tsfm	0.678844	0.0205971	0.121	0.11	1	1.1	0
Selenof	0.0623648	0.158351	0.541	0.492	1	1.09959	0
Kcnq3	0.637774	0.0183391	0.265	0.241	1	1.09959	0
Slc33a1	0.520168	0.0973131	0.155	0.141	1	1.09929	0
Smc6	0.149761	0.159646	0.455	0.414	1	1.09903	0
Lcor	0.517767	0.111697	0.178	0.162	1	1.09877	0
Psmb2	0.585742	0.104855	0.178	0.162	1	1.09877	0
Gabra5	0.666972	0.0238037	0.178	0.162	1	1.09877	0
Slc30a5	0.580266	0.0414314	0.167	0.152	1	1.09868	0
Lims1	0.641164	0.0318021	0.167	0.152	1	1.09868	0
Pmepa1	0.662277	0.0155217	0.167	0.152	1	1.09868	0
Sar1a	0.158255	0.164327	0.448	0.408	1	1.09804	0
Map3k4	0.482075	0.0601545	0.247	0.225	1	1.09778	0
Rbm7	0.50374	0.0296335	0.247	0.225	1	1.09778	0
Amotl1	0.477927	0.0499644	0.304	0.277	1	1.09747	0
Cetn2	0.425715	0.0265986	0.259	0.236	1	1.09746	0
Sec61a1	0.490455	0.0676968	0.327	0.298	1	1.09732	0
Pdia6	0.253784	0.161814	0.385	0.351	1	1.09687	0
Wdr48	0.587116	0.0556677	0.206	0.188	1	1.09574	0
Armc9	0.620629	0.0466367	0.229	0.209	1	1.09569	0
Asphd1	0.585283	0.11836	0.126	0.115	1	1.09565	0
Lmna	0.678476	0.0433948	0.126	0.115	1	1.09565	0
Bbs5	0.688492	0.050594	0.126	0.115	1	1.09565	0
Pigx	0.709507	0.0245901	0.126	0.115	1	1.09565	0
Supt6	0.35638	0.0807693	0.298	0.272	1	1.09559	0
Sft2d3	0.551375	0.0988263	0.149	0.136	1	1.09559	0
Cog8	0.633587	0.0594165	0.149	0.136	1	1.09559	0
Mier3	0.650339	0.0896544	0.149	0.136	1	1.09559	0
Zfp60	0.630293	0.0670163	0.172	0.157	1	1.09554	0
Gin1	0.601772	0.0640268	0.195	0.178	1	1.09551	0
Actl6a	0.512048	0.0729906	0.264	0.241	1	1.09544	0
Ksr2	0.475949	0.0593122	0.287	0.262	1	1.09542	0
Mfsd5	0.661989	0.0293042	0.115	0.105	1	1.09524	0
Dhx30	0.0273819	0.234616	0.579	0.529	1	1.09452	0
Mcfd2	0.0534119	0.216106	0.418	0.382	1	1.09424	0
Arl6ip5	0.153534	0.162558	0.418	0.382	1	1.09424	0
Gm10076	0.354801	0.060549	0.395	0.361	1	1.09418	0
Capns1	0.420355	0.0723436	0.43	0.393	1	1.09415	0
Zfr	0.017227	0.176686	0.63	0.576	1	1.09375	0
Dync1i2	0.0827532	0.174893	0.584	0.534	1	1.09363	0
Deaf1	0.328984	0.0917042	0.292	0.267	1	1.09363	0
Gtf2a1	0.458379	0.0706881	0.258	0.236	1	1.09322	0
Ccnt2	0.00740264	0.273944	0.704	0.644	1	1.09317	0
Clcn7	0.502356	0.0985837	0.235	0.215	1	1.09302	0
Pnrc2	0.516822	0.117867	0.235	0.215	1	1.09302	0
Smarcad1	0.583379	0.103697	0.2	0.183	1	1.0929	0
Polr2f	0.555692	0.0576099	0.412	0.377	1	1.09284	0
Plppr3	0.155761	0.212737	0.389	0.356	1	1.0927	0
Slc35a5	0.547024	0.0809878	0.177	0.162	1	1.09259	0
Ganab	0.339509	0.103913	0.355	0.325	1	1.09231	0
Dnajc2	0.672685	0.0207477	0.154	0.141	1	1.0922	0
Pkn1	0.677557	0.0172802	0.154	0.141	1	1.0922	0
Rev3l	0.389197	0.0682394	0.32	0.293	1	1.09215	0
Rgl2	0.54871	0.124896	0.166	0.152	1	1.09211	0
Pex11b	0.601421	0.032352	0.166	0.152	1	1.09211	0
Gps2	0.589484	0.10027	0.131	0.12	1	1.09167	0
Eif3l	0.742129	0.0456463	0.131	0.12	1	1.09167	0
Nomo1	0.423787	0.0778822	0.274	0.251	1	1.09163	0
Arpc4	0.42613	0.0682171	0.274	0.251	1	1.09163	0
Cmip	0.338529	0.128994	0.286	0.262	1	1.0916	0
6430548M08Rik	0.3548	0.0688503	0.371	0.34	1	1.09118	0
Srsf10	0.100303	0.168798	0.491	0.45	1	1.09111	0
Lsm5	0.475981	0.0691154	0.228	0.209	1	1.09091	0
Itch	0.482122	0.0867987	0.348	0.319	1	1.09091	0
Pofut2	0.630968	0.00628727	0.228	0.209	1	1.09091	0
Mak16	0.680455	0.0238833	0.12	0.11	1	1.09091	0
Tsc2	0.685082	0.0417271	0.12	0.11	1	1.09091	0
Phc1	0.696985	0.0414437	0.108	0.099	1	1.09091	0
Itm2c	1.32659e-21	0.572089	0.937	0.859	2.69894e-17	1.0908	38.1511
Hnrnpl	0.214252	0.114475	0.445	0.408	1	1.09069	0
Rnf138	0.433008	0.110631	0.217	0.199	1	1.09045	0
Ift46	0.53724	0.062069	0.205	0.188	1	1.09043	0
Srp54a	0.633173	0.02898	0.205	0.188	1	1.09043	0
Ranbp3	0.506314	0.12127	0.194	0.178	1	1.08989	0
Unc5c	0.588398	0.0469111	0.268	0.246	1	1.08943	0
Mesd	0.181751	0.168628	0.439	0.403	1	1.08933	0
Rasgef1b	0.566527	0.080109	0.171	0.157	1	1.08917	0
Ngrn	0.461198	0.092545	0.257	0.236	1	1.08898	0
Ssr2	0.405331	0.120657	0.245	0.225	1	1.08889	0
Gstm5	0.495402	0.0623861	0.245	0.225	1	1.08889	0
Prrg3	0.6057	0.00679941	0.245	0.225	1	1.08889	0
Ptprn	6.30454e-06	0.36047	0.809	0.743	0.128266	1.08883	2.05365
Add1	0.255085	0.111898	0.467	0.429	1	1.08858	0
Ptpdc1	0.5728	0.0668491	0.16	0.147	1	1.08844	0
Tssc4	0.388921	0.164331	0.234	0.215	1	1.08837	0
Tcea1	0.583058	0.0553714	0.296	0.272	1	1.08824	0
Tial1	0.0570119	0.180117	0.558	0.513	1	1.08772	0
Ski	0.511514	0.0800967	0.211	0.194	1	1.08763	0
Nagk	0.0154715	0.235862	0.535	0.492	1	1.0874	0
Gria1	0.020959	0.170352	0.672	0.618	1	1.08738	0
Srr	0.58606	0.0487029	0.137	0.126	1	1.0873	0
Mapkap1	0.593231	0.0590745	0.137	0.126	1	1.0873	0
Med9	0.697076	0.00718263	0.137	0.126	1	1.0873	0
Ssbp3	0.0938758	0.143447	0.524	0.482	1	1.08714	0
Ankrd13a	0.694052	0.0487938	0.125	0.115	1	1.08696	0
Cnnm1	0.275271	0.132333	0.376	0.346	1	1.08671	0
Pdlim7	0.235611	0.137337	0.364	0.335	1	1.08657	0
Fam136a	0.673637	0.0264007	0.239	0.22	1	1.08636	0
Anapc5	0.0168173	0.236008	0.529	0.487	1	1.08624	0
Prelid1	0.478786	0.0660157	0.29	0.267	1	1.08614	0
Rbbp7	0.27147	0.124384	0.341	0.314	1	1.08599	0
Srsf5	0.0113092	0.186218	0.785	0.723	1	1.08575	0
Lsg1	0.666363	0.0402823	0.114	0.105	1	1.08571	0
Chmp2a	0.420058	0.101804	0.33	0.304	1	1.08553	0
Tor1b	0.563842	0.0586113	0.165	0.152	1	1.08553	0
Exosc8	0.618857	0.0754808	0.165	0.152	1	1.08553	0
Tm2d3	0.540653	0.0642974	0.216	0.199	1	1.08543	0
Pnrc1	0.59532	0.0684969	0.216	0.199	1	1.08543	0
Ubac2	0.669359	0.0135027	0.216	0.199	1	1.08543	0
Coa5	0.573882	0.0394862	0.267	0.246	1	1.08537	0
Prcp	0.752117	0.0192781	0.102	0.094	1	1.08511	0
Kctd18	0.778301	0.0137886	0.102	0.094	1	1.08511	0
Lpcat1	0.529743	0.0581228	0.256	0.236	1	1.08475	0
Fam117b	0.561512	0.033439	0.346	0.319	1	1.08464	0
Mrps17	0.379403	0.0796705	0.295	0.272	1	1.08456	0
Dpysl5	0.449608	0.0781745	0.244	0.225	1	1.08444	0
Lsamp	1.18621e-11	0.448324	0.874	0.806	2.41334e-07	1.08437	15.2371
Polr1c	0.597697	0.0691535	0.193	0.178	1	1.08427	0
Socs2	0.288087	0.177937	0.335	0.309	1	1.08414	0
Ptbp2	0.196855	0.137715	0.426	0.393	1	1.08397	0
1110008P14Rik	0.387106	0.0916605	0.426	0.393	1	1.08397	0
Fbxl2	0.710158	0.0429038	0.142	0.131	1	1.08397	0
Cbx1	0.496524	0.0494727	0.375	0.346	1	1.08382	0
Pdpk1	0.536836	0.0244249	0.363	0.335	1	1.08358	0
Fam214b	0.526238	0.0571844	0.221	0.204	1	1.08333	0
Cetn4	0.645167	0.0627863	0.182	0.168	1	1.08333	0
Preb	0.666152	0.0130292	0.182	0.168	1	1.08333	0
Morc3	0.670676	0.0787265	0.13	0.12	1	1.08333	0
Tmem67	0.754533	0.0366833	0.13	0.12	1	1.08333	0
Tmem208	0.457419	0.0756436	0.3	0.277	1	1.08303	0
Hddc2	0.603103	0.0861769	0.17	0.157	1	1.0828	0
Fbxl20	0.619837	0.0327727	0.17	0.157	1	1.0828	0
Arxes1	0.356687	0.203291	0.249	0.23	1	1.08261	0
Adgrb3	0.0038042	0.264436	0.59	0.545	1	1.08257	0
Gaa	1.20017e-10	0.390009	0.879	0.812	2.44174e-06	1.08251	12.9228
Sypl	0.590579	0.0516976	0.21	0.194	1	1.08247	0
Fkbp4	0.230011	0.129325	0.396	0.366	1	1.08197	0
Lamtor4	0.157399	0.174867	0.436	0.403	1	1.08189	0
Irak1bp1	0.618259	0.0364436	0.238	0.22	1	1.08182	0
Pkd2	0.658691	0.0909664	0.119	0.11	1	1.08182	0
Ext1	0.700063	0.0520767	0.119	0.11	1	1.08182	0
Sart1	0.757767	0.0144202	0.119	0.11	1	1.08182	0
Map2k7	0.471495	0.0722757	0.278	0.257	1	1.08171	0
Ncstn	0.589496	0.105518	0.159	0.147	1	1.08163	0
Gm9856	0.416574	0.0370359	0.345	0.319	1	1.0815	0
Psma4	0.636193	0.044032	0.226	0.209	1	1.08134	0
Phf10	0.779444	0.0366405	0.226	0.209	1	1.08134	0
Fyttd1	0.151703	0.133515	0.441	0.408	1	1.08088	0
Dock7	0.33757	0.130822	0.294	0.272	1	1.08088	0
Nim1k	0.656743	0.0770494	0.147	0.136	1	1.08088	0
Lyrm4	0.730994	0.001026	0.147	0.136	1	1.08088	0
Dhcr7	0.733936	0.0380193	0.147	0.136	1	1.08088	0
Gna11	0.389114	0.101926	0.402	0.372	1	1.08065	0
Togaram1	0.668971	0.0669562	0.215	0.199	1	1.0804	0
Mettl9	0.341539	0.116721	0.39	0.361	1	1.08033	0
Wdr35	0.666488	0.0559375	0.175	0.162	1	1.08025	0
Agpat4	0.176288	0.163496	0.418	0.387	1	1.0801	0
Ubr3	0.399664	0.054431	0.418	0.387	1	1.0801	0
Gpm6b	0.243551	0.188593	0.367	0.34	1	1.07941	0
Miat	0.257505	0.147902	0.435	0.403	1	1.0794	0
Fbxl12	0.651041	0.0677308	0.136	0.126	1	1.07937	0
Nsun7	0.666902	0.0662393	0.136	0.126	1	1.07937	0
Zdhhc7	0.731468	0.0278844	0.136	0.126	1	1.07937	0
Kif3b	0.616652	0.0485612	0.164	0.152	1	1.07895	0
Srpk1	0.415951	0.126673	0.288	0.267	1	1.07865	0
Rcbtb1	0.661569	0.0312761	0.192	0.178	1	1.07865	0
Psme2	0.567473	0.0761887	0.22	0.204	1	1.07843	0
Tbc1d14	0.581788	0.0760333	0.22	0.204	1	1.07843	0
Phf21a	0.602839	0.061229	0.22	0.204	1	1.07843	0
Elf2	0.68707	0.0496396	0.124	0.115	1	1.07826	0
Cenpb	0.785489	0.0103703	0.124	0.115	1	1.07826	0
Trim24	0.659894	0.0541412	0.152	0.141	1	1.07801	0
Nudt9	0.777268	0.00828734	0.152	0.141	1	1.07801	0
Clmp	0.5762	0.0402793	0.277	0.257	1	1.07782	0
Fbxo25	0.728206	0.0149847	0.277	0.257	1	1.07782	0
Poglut1	0.735186	0.0239888	0.293	0.272	1	1.07721	0
Serpini1	0.331412	0.106298	0.394	0.366	1	1.0765	0
Mapk14	0.543817	0.0703687	0.197	0.183	1	1.0765	0
Vezf1	0.517543	0.0336524	0.254	0.236	1	1.07627	0
Ambra1	0.663554	0.0741877	0.113	0.105	1	1.07619	0
Smyd3	0.650717	0.0681979	0.242	0.225	1	1.07556	0
Ipo4	0.500446	0.136338	0.214	0.199	1	1.07538	0
Gpc1	0.595232	0.0942039	0.186	0.173	1	1.07514	0
Dot1l	0.59912	0.0733359	0.186	0.173	1	1.07514	0
Dnm2	0.795686	0.052813	0.129	0.12	1	1.075	0
Ncbp2	0.562103	0.057074	0.287	0.267	1	1.07491	0
Sipa1l1	0.346417	0.129021	0.259	0.241	1	1.07469	0
Ssr1	6.72535e-05	0.284524	0.793	0.738	1	1.07453	0
C030014I23Rik	0.67748	0.0702391	0.101	0.094	1	1.07447	0
Lnx1	0.744331	0.0735976	0.101	0.094	1	1.07447	0
Rbck1	0.615881	0.0587622	0.231	0.215	1	1.07442	0
Cnot7	0.209879	0.160921	0.405	0.377	1	1.07427	0
Znhit2	0.646398	0.0627526	0.174	0.162	1	1.07407	0
Icmt	0.646949	0.0878834	0.174	0.162	1	1.07407	0
Ist1	0.485218	0.107136	0.276	0.257	1	1.07393	0
Lrpap1	0.0853534	0.227826	0.523	0.487	1	1.07392	0
Anapc1	0.505291	0.108588	0.247	0.23	1	1.07391	0
Zfp811	0.736203	0.00654947	0.146	0.136	1	1.07353	0
Fhl1	0.220169	0.121187	0.41	0.382	1	1.0733	0
Scaper	0.645144	0.0258858	0.264	0.246	1	1.07317	0
Ufd1	0.690201	0.0315806	0.264	0.246	1	1.07317	0
Rab28	0.365515	0.103044	0.427	0.398	1	1.07286	0
Sergef	0.749554	0.0489293	0.118	0.11	1	1.07273	0
Anp32b	0.271071	0.105202	0.326	0.304	1	1.07237	0
Heatr6	0.702094	0.0587631	0.163	0.152	1	1.07237	0
Churc1	0.407119	0.081027	0.371	0.346	1	1.07225	0
Fam76a	0.523946	0.0755924	0.297	0.277	1	1.0722	0
Cdkl5	0.599129	0.0176189	0.297	0.277	1	1.0722	0
Rhot2	0.619718	0.0667156	0.208	0.194	1	1.07216	0
Dmtf1	0.517414	0.101272	0.253	0.236	1	1.07203	0
Tmem199	0.771963	0.0162724	0.253	0.236	1	1.07203	0
Cabin1	0.489457	0.0887747	0.314	0.293	1	1.07167	0
Chp1	0.694245	0.0147357	0.449	0.419	1	1.0716	0
Lhfpl4	0.261445	0.112499	0.539	0.503	1	1.07157	0
Dmac1	0.603596	0.0645407	0.18	0.168	1	1.07143	0
Gpr89	0.798731	0.0235735	0.135	0.126	1	1.07143	0
Zfp780b	0.801815	0.0127977	0.18	0.168	1	1.07143	0
Prnp	2.69678e-08	0.332042	0.886	0.827	0.000548659	1.07134	7.50803
Rbm17	0.673533	0.0543981	0.241	0.225	1	1.07111	0
Acat1	0.749167	0.00395615	0.241	0.225	1	1.07111	0
Taf10	0.606712	0.0495604	0.196	0.183	1	1.07104	0
Cd2bp2	0.672424	0.0228527	0.196	0.183	1	1.07104	0
Dffb	0.698275	0.0737979	0.151	0.141	1	1.07092	0
Nol4	0.625273	0.0386964	0.319	0.298	1	1.07047	0
Naa30	0.728442	0.0321185	0.213	0.199	1	1.07035	0
Tnpo3	0.448467	0.0719472	0.336	0.314	1	1.07006	0
Ccdc115	0.702345	0.0497089	0.123	0.115	1	1.06957	0
Vps33a	0.786	0.0354201	0.123	0.115	1	1.06957	0
Klhl20	0.788051	0.0411963	0.123	0.115	1	1.06957	0
Trmt10a	0.807091	0.0103407	0.123	0.115	1	1.06957	0
Mbd1	0.619868	0.0653977	0.185	0.173	1	1.06936	0
Keap1	0.469342	0.0723714	0.325	0.304	1	1.06908	0
Polr2j	0.581245	0.0733035	0.325	0.304	1	1.06908	0
Pmm2	0.633807	0.0533039	0.14	0.131	1	1.0687	0
Rab23	0.791169	0.0101756	0.14	0.131	1	1.0687	0
Nfat5	0.337914	0.113666	0.358	0.335	1	1.06866	0
Zranb2	0.437737	0.073906	0.716	0.67	1	1.06866	0
Resp18	0.0109061	0.258721	0.671	0.628	1	1.06847	0
Rps19bp1	0.628471	0.0509847	0.157	0.147	1	1.06803	0
Exd2	0.62049	0.0624022	0.173	0.162	1	1.0679	0
Dcaf1	0.656482	0.0631922	0.173	0.162	1	1.0679	0
Ilk	0.673103	0.0708307	0.173	0.162	1	1.0679	0
Ldah	0.673384	0.0651217	0.173	0.162	1	1.0679	0
Dmd	0.512699	0.125659	0.285	0.267	1	1.06742	0
Colgalt1	0.700524	0.0299418	0.19	0.178	1	1.06742	0
Anks3	0.678661	0.0537762	0.207	0.194	1	1.06701	0
Pnmal1	0.0164798	0.191067	0.559	0.524	1	1.06679	0
Kcnip2	0.800863	0.0120447	0.112	0.105	1	1.06667	0
Map9	0.200978	0.135233	0.385	0.361	1	1.06648	0
Nip7	0.665203	0.05934	0.145	0.136	1	1.06618	0
Ptprf	0.287431	0.0965335	0.419	0.393	1	1.06616	0
Maz	0.74942	0.0138801	0.274	0.257	1	1.06615	0
Rhob	0.668821	0.0307745	0.324	0.304	1	1.06579	0
Sdf2	0.240221	0.203896	0.357	0.335	1	1.06567	0
4921524J17Rik	0.596094	0.0832203	0.195	0.183	1	1.06557	0
Pgam5	0.735607	0.0263503	0.212	0.199	1	1.06533	0
Lgals8	0.598273	0.0653068	0.229	0.215	1	1.06512	0
Mrps26	0.175968	0.152649	0.524	0.492	1	1.06504	0
Kdm5b	0.564333	0.0772935	0.295	0.277	1	1.06498	0
Kpnb1	0.40018	0.101717	0.379	0.356	1	1.06461	0
Srsf7	0.194801	0.143248	0.529	0.497	1	1.06439	0
4931406P16Rik	0.688274	0.0543446	0.2	0.188	1	1.06383	0
Slx1b	0.804755	0.0153916	0.15	0.141	1	1.06383	0
Dusp11	0.379835	0.138613	0.317	0.298	1	1.06376	0
Zfp771	0.590457	0.0702632	0.217	0.204	1	1.06373	0
Srek1	0.1141	0.195112	0.501	0.471	1	1.06369	0
Ttc9c	0.594018	0.0955138	0.167	0.157	1	1.06369	0
Bud23	0.686925	0.0699607	0.167	0.157	1	1.06369	0
Prmt1	0.438986	0.141083	0.234	0.22	1	1.06364	0
Hadha	0.649241	0.0582783	0.234	0.22	1	1.06364	0
Hsd17b10	0.654977	0.0560754	0.134	0.126	1	1.06349	0
Rchy1	0.320753	0.0911013	0.473	0.445	1	1.06292	0
Sf3b6	0.747921	0.0546207	0.239	0.225	1	1.06222	0
Scarb1	0.786513	0.0284203	0.222	0.209	1	1.0622	0
Sorbs1	0.63599	0.0808675	0.172	0.162	1	1.06173	0
Plxdc2	0.66331	0.055158	0.172	0.162	1	1.06173	0
Dapk1	0.794279	0.0157429	0.294	0.277	1	1.06137	0
Noc2l	0.698149	0.00910697	0.156	0.147	1	1.06122	0
Unc45a	0.739422	0.0751409	0.139	0.131	1	1.06107	0
Pim3	0.829825	0.0262887	0.139	0.131	1	1.06107	0
Chmp6	0.832128	0.0315435	0.139	0.131	1	1.06107	0
Slc17a5	0.761761	0.0145215	0.122	0.115	1	1.06087	0
Coro2a	0.814589	0.00727066	0.122	0.115	1	1.06087	0
Irak1	0.3259	0.127544	0.35	0.33	1	1.06061	0
Sh3rf1	0.86759	0.0133329	0.105	0.099	1	1.06061	0
Kmt5b	0.717044	0.0255113	0.211	0.199	1	1.0603	0
Sirpa	0.0907642	0.264214	0.511	0.482	1	1.06017	0
Ctnna2	0.316703	0.121172	0.355	0.335	1	1.0597	0
Osbpl8	0.39348	0.0856039	0.338	0.319	1	1.05956	0
Gtf3c3	0.711821	0.0609516	0.178	0.168	1	1.05952	0
Tmem29	0.524295	0.0681892	0.322	0.304	1	1.05921	0
Uqcc2	0.0638347	0.146169	0.61	0.576	1	1.05903	0
Pitpnb	0.69103	0.0204327	0.305	0.288	1	1.05903	0
Rnf208	0.8324	0.0220911	0.449	0.424	1	1.05896	0
Mapk3	0.511719	0.0780463	0.288	0.272	1	1.05882	0
Rhot1	0.717256	0.0270352	0.216	0.204	1	1.05882	0
Dpp8	0.782773	0.0494858	0.127	0.12	1	1.05833	0
Trappc1	0.695268	0.0117485	0.183	0.173	1	1.0578	0
Fndc3a	0.159859	0.116388	0.476	0.45	1	1.05778	0
Rasa1	0.747698	0.0419545	0.238	0.225	1	1.05778	0
Usp30	0.683232	0.0733685	0.166	0.157	1	1.05732	0
Rrp7a	0.687339	0.0407583	0.277	0.262	1	1.05725	0
Magoh	0.770834	0.0609012	0.111	0.105	1	1.05714	0
Cul7	0.800504	0.0758644	0.111	0.105	1	1.05714	0
Gnai2	0.00069112	0.26504	0.631	0.597	1	1.05695	0
Zcchc12	3.50904e-07	0.455475	0.67	0.634	0.00713915	1.05678	4.94216
Sdhaf3	0.743166	0.0541619	0.149	0.141	1	1.05674	0
Chchd5	0.815994	0.0164198	0.149	0.141	1	1.05674	0
Thoc2	0.495811	0.0772488	0.448	0.424	1	1.0566	0
Commd4	0.680752	0.101008	0.243	0.23	1	1.05652	0
Zfp846	0.306128	0.151077	0.431	0.408	1	1.05637	0
Rev1	0.579716	0.0586146	0.282	0.267	1	1.05618	0
Tpst1	0.787947	0.0140805	0.188	0.178	1	1.05618	0
Ppp1r1a	0.401611	0.117837	0.359	0.34	1	1.05588	0
Ppp6c	0.708476	0.0492962	0.227	0.215	1	1.05581	0
Tox2	0.723551	0.0480942	0.227	0.215	1	1.05581	0
Tnfaip1	0.702003	0.0732724	0.171	0.162	1	1.05556	0
Max	0.725191	0.0114353	0.304	0.288	1	1.05556	0
Morc2a	0.762313	0.0396301	0.133	0.126	1	1.05556	0
Ehmt1	0.652416	0.0655951	0.21	0.199	1	1.05528	0
Kif21b	0.841609	0.0336738	0.193	0.183	1	1.05464	0
Entpd6	0.593622	0.0858613	0.348	0.33	1	1.05455	0
Pum1	0.226062	0.114718	0.447	0.424	1	1.05425	0
Txndc9	0.689026	0.0575444	0.292	0.277	1	1.05415	0
Lrfn5	0.00014173	0.34008	0.701	0.665	1	1.05414	0
Efnb3	0.0276906	0.237791	0.701	0.665	1	1.05414	0
Pcm1	0.578718	0.0684228	0.43	0.408	1	1.05392	0
Naxe	0.637465	0.127359	0.215	0.204	1	1.05392	0
Snx17	0.642001	0.0793516	0.215	0.204	1	1.05392	0
Dcaf12l1	0.85336	0.00342995	0.392	0.372	1	1.05376	0
Nrsn1	3.4564e-06	0.30353	0.844	0.801	0.0703204	1.05368	2.65469
Tceal3	0.531779	0.0661125	0.452	0.429	1	1.05361	0
Tmem14a	0.745099	0.0818847	0.177	0.168	1	1.05357	0
Snrpd3	0.53659	0.0640141	0.237	0.225	1	1.05333	0
Gtf2h5	0.611121	0.0409732	0.436	0.414	1	1.05314	0
A730017C20Rik	0.0135447	0.191034	0.595	0.565	1	1.0531	0
Cnot6l	0.504729	0.0487219	0.298	0.283	1	1.053	0
Lrrtm2	0.681791	0.0600764	0.32	0.304	1	1.05263	0
Socs6	0.89447	0.00379562	0.16	0.152	1	1.05263	0
Ptpn23	0.78702	0.0295234	0.121	0.115	1	1.05217	0
Trip11	0.607319	0.0815505	0.303	0.288	1	1.05208	0
Gtf3a	0.715227	0.0533068	0.182	0.173	1	1.05202	0
Ctif	0.523255	0.085038	0.264	0.251	1	1.05179	0
Acbd6	0.774664	0.0573303	0.264	0.251	1	1.05179	0
Lysmd2	0.731397	0.0131989	0.308	0.293	1	1.05119	0
Rnf166	0.820336	0.0287141	0.165	0.157	1	1.05096	0
Spcs1	0.464951	0.107923	0.435	0.414	1	1.05072	0
Rpl39	0.00166052	0.154498	0.891	0.848	1	1.05071	0
Tmem167	0.442046	0.137184	0.374	0.356	1	1.05056	0
Mmp17	0.71267	0.0508557	0.187	0.178	1	1.05056	0
Ppt2	0.769728	0.0691585	0.104	0.099	1	1.05051	0
Fam76b	0.83339	0.0480495	0.104	0.099	1	1.05051	0
Armc6	0.843466	0.0582425	0.104	0.099	1	1.05051	0
Lin7c	0.460838	0.0870292	0.357	0.34	1	1.05	0
Mmd2	0.742321	0.10621	0.126	0.12	1	1.05	0
Smad7	0.819392	0.0277857	0.126	0.12	1	1.05	0
Cul9	0.596151	0.0473951	0.253	0.241	1	1.04979	0
Slc25a44	0.612921	0.0903286	0.253	0.241	1	1.04979	0
Marcks	0.00353857	0.209873	0.654	0.623	1	1.04976	0
Abcb10	0.713546	0.0832242	0.192	0.183	1	1.04918	0
Actn4	0.642584	0.081363	0.214	0.204	1	1.04902	0
Tmem214	0.675278	0.0924118	0.214	0.204	1	1.04902	0
Ssrp1	0.819432	0.0399083	0.236	0.225	1	1.04889	0
Wasf1	0.504845	0.0839072	0.28	0.267	1	1.04869	0
Fam131a	0.526638	0.0786526	0.302	0.288	1	1.04861	0
Rnf41	0.562006	0.0706076	0.302	0.288	1	1.04861	0
Zmym3	0.452878	0.0500319	0.412	0.393	1	1.04835	0
BC005561	0.167763	0.178044	0.521	0.497	1	1.04829	0
Ergic1	0.295617	0.129045	0.456	0.435	1	1.04828	0
Ldha	0.500665	0.0911904	0.285	0.272	1	1.04779	0
Fam91a1	0.529576	0.0720687	0.285	0.272	1	1.04779	0
Cnrip1	0.177434	0.138168	0.549	0.524	1	1.04771	0
Naa25	0.722818	0.0472158	0.154	0.147	1	1.04762	0
Mb21d2	0.752761	0.0268542	0.11	0.105	1	1.04762	0
Pcgf6	0.778573	0.0573429	0.132	0.126	1	1.04762	0
Atg14	0.857414	0.0336741	0.11	0.105	1	1.04762	0
4931406C07Rik	0.878713	0.00662862	0.11	0.105	1	1.04762	0
Csnk1a1	0.265539	0.113214	0.642	0.613	1	1.04731	0
Saraf	0.00017485	0.294905	0.735	0.702	1	1.04701	0
Pcyt2	0.481997	0.156457	0.312	0.298	1	1.04698	0
Acp1	0.0122312	0.240095	0.828	0.791	1	1.04678	0
Pex5l	0.742755	0.084216	0.247	0.236	1	1.04661	0
Mcl1	0.790681	0.0102162	0.181	0.173	1	1.04624	0
Celf2	0.209207	0.137399	0.657	0.628	1	1.04618	0
Qsox2	0.794426	0.0437397	0.159	0.152	1	1.04605	0
Hspa13	0.481579	0.0725886	0.455	0.435	1	1.04598	0
Naa20	0.648659	0.0942963	0.252	0.241	1	1.04564	0
Rap2a	0.764861	0.0289593	0.252	0.241	1	1.04564	0
Kpna3	0.426662	0.0592731	0.345	0.33	1	1.04545	0
Tada2a	0.799408	0.0382192	0.115	0.11	1	1.04545	0
Angptl6	0.806118	0.06143	0.115	0.11	1	1.04545	0
Mettl17	0.607674	0.104132	0.208	0.199	1	1.04523	0
Cggbp1	0.473471	0.103736	0.394	0.377	1	1.04509	0
Sfpq	0.197309	0.157444	0.487	0.466	1	1.04506	0
Dnttip1	0.607646	0.126998	0.186	0.178	1	1.04494	0
Mapk6	0.669949	0.0660356	0.186	0.178	1	1.04494	0
Chrac1	0.77026	0.0473307	0.186	0.178	1	1.04494	0
Gas7	0.196141	0.179052	0.443	0.424	1	1.04481	0
Crmp1	0.517583	0.0372018	0.443	0.424	1	1.04481	0
Akap7	0.650528	0.0375018	0.257	0.246	1	1.04472	0
Ptp4a1	0.0579763	0.196173	0.492	0.471	1	1.04459	0
Becn1	0.620084	0.0609047	0.328	0.314	1	1.04459	0
Cic	0.823011	0.00746616	0.235	0.225	1	1.04444	0
Zmiz1	0.729762	0.00190657	0.377	0.361	1	1.04432	0
Meaf6	0.448976	0.110396	0.426	0.408	1	1.04412	0
Gtf2f1	0.789984	0.0556332	0.142	0.136	1	1.04412	0
Med28	0.015111	0.22879	0.569	0.545	1	1.04404	0
Stard7	0.512225	0.0839769	0.333	0.319	1	1.04389	0
Wapl	0.619928	0.0655292	0.262	0.251	1	1.04382	0
Zfp397	0.744072	0.0560849	0.191	0.183	1	1.04372	0
Lmbrd2	0.760185	0.000166694	0.382	0.366	1	1.04372	0
Nr2c2ap	0.797405	0.0473385	0.191	0.183	1	1.04372	0
Tsc22d4	0.805537	0.0345267	0.191	0.183	1	1.04372	0
Mtm1	0.842923	0.0471014	0.12	0.115	1	1.04348	0
Larp7	0.851007	0.0312582	0.12	0.115	1	1.04348	0
Arntl	0.888456	0.0390937	0.12	0.115	1	1.04348	0
Ap1s1	0.635474	0.0347337	0.41	0.393	1	1.04326	0
Unc79	0.752414	0.0680309	0.169	0.162	1	1.04321	0
Tubgcp3	0.858492	0.0164678	0.169	0.162	1	1.04321	0
Spag9	0.0394741	0.142514	0.606	0.581	1	1.04303	0
Golph3	0.590238	0.0622867	0.317	0.304	1	1.04276	0
Pcp4	8.84158e-16	0.872633	0.879	0.843	1.79882e-11	1.0427	24.7413
Usp36	0.709727	0.091865	0.196	0.188	1	1.04255	0
0610037L13Rik	0.723667	0.071056	0.147	0.141	1	1.04255	0
Actr3b	0.796687	0.006233	0.196	0.188	1	1.04255	0
Tmem184b	0.852674	0.0250342	0.147	0.141	1	1.04255	0
Prdx1	0.705092	0.0214628	0.344	0.33	1	1.04242	0
Zcchc11	0.575682	0.124561	0.469	0.45	1	1.04222	0
Tmem50a	0.62207	0.0515996	0.42	0.403	1	1.04218	0
Map3k12	0.433547	0.113314	0.322	0.309	1	1.04207	0
Nucb1	0.512631	0.162808	0.224	0.215	1	1.04186	0
Cnot10	0.697661	0.0899112	0.224	0.215	1	1.04186	0
Mpp5	0.729597	0.052434	0.224	0.215	1	1.04186	0
Hist3h2ba	0.456275	0.142993	0.3	0.288	1	1.04167	0
Mbd6	0.712194	0.100699	0.175	0.168	1	1.04167	0
Dscaml1	0.865737	0.0187588	0.175	0.168	1	1.04167	0
Narf	0.870483	0.0157403	0.125	0.12	1	1.04167	0
Kat2a	0.9098	0.00148487	0.175	0.168	1	1.04167	0
Nbeal1	0.591929	0.149856	0.376	0.361	1	1.04155	0
Tigd2	0.663624	0.070611	0.327	0.314	1	1.0414	0
Hdac4	0.766699	0.0560347	0.202	0.194	1	1.04124	0
Slitrk1	0.660764	0.0394791	0.381	0.366	1	1.04098	0
Chpt1	0.53198	0.168991	0.305	0.293	1	1.04096	0
Aamp	0.579525	0.0709272	0.305	0.293	1	1.04096	0
Serf1	0.995296	0.00897079	0.305	0.293	1	1.04096	0
Rab8a	0.649248	0.0443498	0.229	0.22	1	1.04091	0
Zfp414	0.658916	0.0605696	0.229	0.22	1	1.04091	0
Derl1	0.666535	0.0626889	0.409	0.393	1	1.04071	0
Fxyd4	0.852991	0.0617274	0.103	0.099	1	1.0404	0
Tia1	0.00714543	0.194979	0.816	0.785	1	1.03949	0
Sec61a2	0.613287	0.0375443	0.528	0.508	1	1.03937	0
Cfdp1	0.311348	0.121214	0.37	0.356	1	1.03933	0
Polr2g	0.487163	0.0363841	0.37	0.356	1	1.03933	0
Ica1l	0.714082	0.0882965	0.185	0.178	1	1.03933	0
Srsf6	0.299477	0.144783	0.397	0.382	1	1.03927	0
Lmbr1	0.782832	0.00292815	0.239	0.23	1	1.03913	0
Hjurp	0.557461	0.150551	0.267	0.257	1	1.03891	0
Pigp	0.803451	0.0138886	0.19	0.183	1	1.03825	0
2900093K20Rik	0.661065	0.114006	0.163	0.157	1	1.03822	0
Gse1	0.709429	0.062338	0.326	0.314	1	1.03822	0
Nedd4l	0.618697	0.0791876	0.299	0.288	1	1.03819	0
Mlycd	0.8766	0.0165978	0.109	0.105	1	1.0381	0
Maged1	5.03109e-08	0.390223	0.826	0.796	0.00102358	1.03769	6.88445
Fzd3	0.67119	0.0569776	0.386	0.372	1	1.03763	0
Tspan2	0.878087	0.0265303	0.277	0.267	1	1.03745	0
Luc7l3	0.0590069	0.148376	0.733	0.707	1	1.03678	0
Sephs2	0.638883	0.0607926	0.228	0.22	1	1.03636	0
0610009B22Rik	0.751746	0.0759249	0.228	0.22	1	1.03636	0
Dhx29	0.876368	0.0422986	0.114	0.11	1	1.03636	0
Nrxn1	7.18191e-05	0.224718	0.835	0.806	1	1.03598	0
Gatad2b	0.466065	0.0600061	0.521	0.503	1	1.03579	0
Ece2	0.843545	0.0179556	0.233	0.225	1	1.03556	0
Rgs19	0.831688	0.00769612	0.146	0.141	1	1.03546	0
Nprl2	0.850512	0.0270483	0.146	0.141	1	1.03546	0
Rnf150	0.600067	0.118171	0.206	0.199	1	1.03518	0
Rab24	0.808532	0.00642082	0.412	0.398	1	1.03518	0
Cep19	0.818181	0.000929133	0.298	0.288	1	1.03472	0
Mpv17l	0.682258	0.0680881	0.271	0.262	1	1.03435	0
Tox4	0.767533	0.0398645	0.271	0.262	1	1.03435	0
Cnnm3	0.772247	0.075019	0.211	0.204	1	1.03431	0
Sesn3	0.433559	0.0844563	0.487	0.471	1	1.03397	0
Rspry1	0.916681	0.0260766	0.336	0.325	1	1.03385	0
Baiap2	0.54093	0.0784536	0.276	0.267	1	1.03371	0
Rc3h1	0.808287	0.0375603	0.276	0.267	1	1.03371	0
Sdc2	0.629027	0.0669004	0.308	0.298	1	1.03356	0
Pet100	0.705769	0.0929207	0.308	0.298	1	1.03356	0
AI480526	0.646497	0.10293	0.216	0.209	1	1.03349	0
Smyd2	0.861584	5.77049e-05	0.216	0.209	1	1.03349	0
Tmem130	8.1863e-08	0.280767	0.958	0.927	0.0016655	1.03344	6.39763
Pcdhga12	0.838553	0.0600237	0.124	0.12	1	1.03333	0
Tmem179	0.0158666	0.279286	0.595	0.576	1	1.03299	0
Terf2ip	0.582724	0.0761355	0.314	0.304	1	1.03289	0
Exosc2	0.79794	0.0671961	0.157	0.152	1	1.03289	0
Dcun1d4	0.566308	0.0739435	0.346	0.335	1	1.03284	0
Ddx50	0.41106	0.0745925	0.6	0.581	1	1.0327	0
Slc25a23	0.389561	0.101317	0.508	0.492	1	1.03252	0
Smarce1	0.995515	0.00245853	0.254	0.246	1	1.03252	0
Cct7	0.689625	0.0484804	0.286	0.277	1	1.03249	0
D1Ertd622e	0.736263	0.0669719	0.194	0.188	1	1.03191	0
Pbdc1	0.805484	0.0468232	0.162	0.157	1	1.03185	0
Ewsr1	0.0943705	0.178933	0.551	0.534	1	1.03184	0
Rfx3	0.690401	0.0713587	0.227	0.22	1	1.03182	0
Telo2	0.703781	0.0647164	0.227	0.22	1	1.03182	0
Snrpb	0.728484	0.0691966	0.227	0.22	1	1.03182	0
Cacng4	0.898647	0.0340154	0.292	0.283	1	1.0318	0
Zc3h15	0.950592	0.0144978	0.459	0.445	1	1.03146	0
Zcchc14	0.764382	0.0511089	0.265	0.257	1	1.03113	0
Rcc2	0.66768	0.0784035	0.232	0.225	1	1.03111	0
Fus	0.00143919	0.322145	0.831	0.806	1	1.03102	0
Nek4	0.899395	0.00274778	0.2	0.194	1	1.03093	0
Fam32a	0.335982	0.14131	0.367	0.356	1	1.0309	0
Rabl6	0.460392	0.104066	0.367	0.356	1	1.0309	0
Aasdhppt	0.848415	0.0336251	0.167	0.162	1	1.03086	0
Cbr1	0.915603	0.0121376	0.167	0.162	1	1.03086	0
Ptov1	0.579185	0.0996798	0.502	0.487	1	1.0308	0
Acly	0.724252	0.0543085	0.335	0.325	1	1.03077	0
Dcaf6	0.713935	0.0487567	0.135	0.131	1	1.03053	0
Mthfsl	0.785698	0.0118609	0.135	0.131	1	1.03053	0
Slain2	0.843652	0.0137133	0.135	0.131	1	1.03053	0
Map2k5	0.881442	0.0352143	0.135	0.131	1	1.03053	0
Tbcb	0.790956	0.0193937	0.237	0.23	1	1.03043	0
Nr1h2	0.816711	0.105497	0.102	0.099	1	1.0303	0
Gpr180	0.899448	0.0324337	0.102	0.099	1	1.0303	0
Sema3a	0.928466	0.0419806	0.102	0.099	1	1.0303	0
Ints3	0.712422	0.0747734	0.205	0.199	1	1.03015	0
Erp29	0.0963979	0.135965	0.588	0.571	1	1.02977	0
Rlf	0.832689	0.0659751	0.173	0.168	1	1.02976	0
Fam118a	0.897405	0.00653539	0.173	0.168	1	1.02976	0
Appl1	0.568891	0.126315	0.35	0.34	1	1.02941	0
Caly	0.0871824	0.16944	0.673	0.654	1	1.02905	0
Mrps33	0.63973	0.0205892	0.426	0.414	1	1.02899	0
Ikbkb	0.780509	0.0781567	0.178	0.173	1	1.0289	0
Nt5c	0.812084	0.0723638	0.178	0.173	1	1.0289	0
Mtss1	0.521995	0.0976999	0.463	0.45	1	1.02889	0
Dstn	0.434896	0.0711724	0.501	0.487	1	1.02875	0
Agpat5	0.816553	0.0739447	0.215	0.209	1	1.02871	0
Rpl35a	0.107118	0.0611187	0.899	0.874	1	1.0286	0
Ficd	0.806479	0.0650047	0.108	0.105	1	1.02857	0
Wdr20	0.833897	0.0355935	0.108	0.105	1	1.02857	0
Chac2	0.90773	0.0165111	0.108	0.105	1	1.02857	0
Cep63	0.925078	0.00969028	0.108	0.105	1	1.02857	0
Camsap1	0.731651	0.0174901	0.361	0.351	1	1.02849	0
Fam19a2	0.942932	0.0116329	0.145	0.141	1	1.02837	0
Rsf1	0.531831	0.0570852	0.436	0.424	1	1.0283	0
Ebag9	0.579448	0.108382	0.258	0.251	1	1.02789	0
Rprd2	0.763298	0.0549589	0.296	0.288	1	1.02778	0
Trrap	0.674247	0.103278	0.339	0.33	1	1.02727	0
Mest	0.788788	0.0801676	0.113	0.11	1	1.02727	0
Phldb1	0.822247	0.0531377	0.113	0.11	1	1.02727	0
Rpa1	0.871219	0.0317517	0.113	0.11	1	1.02727	0
Dhx32	0.877923	0.0409794	0.113	0.11	1	1.02727	0
Cyp4x1	0.844478	0.0347059	0.151	0.147	1	1.02721	0
Plekhm3	0.845432	0.0553677	0.151	0.147	1	1.02721	0
Etv3	0.869186	0.0248454	0.151	0.147	1	1.02721	0
Agps	0.984608	0.000279896	0.151	0.147	1	1.02721	0
Fam8a1	0.164234	0.199176	0.57	0.555	1	1.02703	0
Spock1	0.287326	0.222765	0.532	0.518	1	1.02703	0
Rab11fip4	0.749786	0.0419636	0.344	0.335	1	1.02687	0
Kdm5a	0.779715	0.0660809	0.344	0.335	1	1.02687	0
Odf2	0.308572	0.174004	0.5	0.487	1	1.02669	0
Nectin1	0.675203	0.108012	0.231	0.225	1	1.02667	0
Polr3k	0.704472	0.0825105	0.231	0.225	1	1.02667	0
Tspan31	0.832648	0.0560241	0.231	0.225	1	1.02667	0
Samd4b	0.933675	0.0301589	0.231	0.225	1	1.02667	0
Dusp22	0.955077	0.0144072	0.193	0.188	1	1.0266	0
Rps3a1	0.106921	0.0951143	0.817	0.796	1	1.02638	0
Cep126	0.831611	0.0246879	0.156	0.152	1	1.02632	0
Map3k7	0.928752	0.00604106	0.156	0.152	1	1.02632	0
Ccdc59	0.700298	0.0992088	0.274	0.267	1	1.02622	0
Arl16	0.78983	0.102608	0.274	0.267	1	1.02622	0
Man1b1	0.785827	0.104021	0.236	0.23	1	1.02609	0
Klhl26	0.900208	0.0273751	0.118	0.115	1	1.02609	0
Vps18	0.932477	0.0184177	0.118	0.115	1	1.02609	0
Slain1	0.98648	0.0233452	0.118	0.115	1	1.02609	0
Klhdc2	0.674881	0.0900851	0.279	0.272	1	1.02574	0
Eif3m	0.454939	0.0943913	0.44	0.429	1	1.02564	0
Wdr6	0.00045864	0.258441	0.644	0.628	1	1.02548	0
Mxra7	0.826978	0.0306441	0.161	0.157	1	1.02548	0
Mtf2	0.717818	0.080113	0.365	0.356	1	1.02528	0
Dad1	0.808333	0.0681796	0.365	0.356	1	1.02528	0
Sik3	0.265484	0.125632	0.408	0.398	1	1.02513	0
Psmf1	0.819394	0.0411598	0.123	0.12	1	1.025	0
Tarbp2	0.936984	0.0255382	0.123	0.12	1	1.025	0
Rgs16	0.943327	0.0575147	0.123	0.12	1	1.025	0
Cuta	0.999201	0.0151513	0.247	0.241	1	1.0249	0
Tmem68	0.956792	0.00123438	0.166	0.162	1	1.02469	0
Xpo7	0.682203	0.0624403	0.333	0.325	1	1.02462	0
Slc39a6	0.670393	0.0660757	0.375	0.366	1	1.02459	0
Rnpc3	0.649884	0.097504	0.257	0.251	1	1.0239	0
Rnf6	0.854508	0.0579095	0.3	0.293	1	1.02389	0
Nenf	0.010169	0.24878	0.772	0.754	1	1.02387	0
Cyb5b	0.374032	0.122377	0.386	0.377	1	1.02387	0
Rbm26	0.603328	0.0982127	0.386	0.377	1	1.02387	0
Acd	0.802601	0.057588	0.172	0.168	1	1.02381	0
Reep5	0.0429378	0.149388	0.82	0.801	1	1.02372	0
Pabpc1	0.785644	0.0746104	0.391	0.382	1	1.02356	0
Nob1	0.823495	0.0535591	0.177	0.173	1	1.02312	0
Ivd	0.90676	0.0116738	0.177	0.173	1	1.02312	0
Trnau1ap	1	0.013314	0.177	0.173	1	1.02312	0
Srsf3	0.284692	0.110493	0.621	0.607	1	1.02306	0
Cep250	0.808305	0.0634525	0.134	0.131	1	1.0229	0
Vps11	0.850217	0.0448079	0.134	0.131	1	1.0229	0
Marcksl1	0.00336973	0.278989	0.584	0.571	1	1.02277	0
1110051M20Rik	0.717193	0.0483581	0.225	0.22	1	1.02273	0
Zhx1	0.82965	0.0340737	0.225	0.22	1	1.02273	0
Tmem263	0.621707	0.098643	0.273	0.267	1	1.02247	0
Thap2	0.631367	0.0809461	0.364	0.356	1	1.02247	0
Rundc3a	0.98426	0.0564958	0.455	0.445	1	1.02247	0
Sgip1	0.623401	0.0626464	0.69	0.675	1	1.02222	0
Jph3	0.651323	0.0608225	0.278	0.272	1	1.02206	0
Uspl1	0.852175	0.0680514	0.139	0.136	1	1.02206	0
Lrif1	0.871687	0.0215952	0.278	0.272	1	1.02206	0
Mbd5	0.902759	0.0148962	0.278	0.272	1	1.02206	0
Zbtb41	0.912912	0.0094304	0.139	0.136	1	1.02206	0
Slc25a17	0.827104	0.0374347	0.235	0.23	1	1.02174	0
Jph4	0.380485	0.122896	0.471	0.461	1	1.02169	0
Eif3f	0.551878	0.0605963	0.615	0.602	1	1.02159	0
Pfkl	0.814533	0.0881164	0.192	0.188	1	1.02128	0
Ophn1	0.915818	0.0190522	0.144	0.141	1	1.02128	0
Abr	0.320116	0.102855	0.583	0.571	1	1.02102	0
Zmat1	0.610349	0.12826	0.294	0.288	1	1.02083	0
Cep164	0.687283	0.124042	0.294	0.288	1	1.02083	0
Ly6h	6.8074e-07	0.28733	0.94	0.921	0.0138497	1.02063	4.27949
Smarcd3	0.764833	0.0612695	0.347	0.34	1	1.02059	0
Arhgap35	0.766876	0.0371032	0.347	0.34	1	1.02059	0
Fam171b	0.011633	0.207921	0.695	0.681	1	1.02056	0
Atp8a1	0.0348328	0.260674	0.695	0.681	1	1.02056	0
Sh3bp5l	0.862606	0.0626823	0.15	0.147	1	1.02041	0
Rwdd4a	0.902451	0.00972423	0.15	0.147	1	1.02041	0
Sys1	0.700097	0.099635	0.401	0.393	1	1.02036	0
Vbp1	0.256653	0.135384	0.502	0.492	1	1.02033	0
Usp42	0.923185	0.0335734	0.101	0.099	1	1.0202	0
Akirin1	0.670396	0.0821938	0.304	0.298	1	1.02013	0
Med15	0.788188	0.0703886	0.203	0.199	1	1.0201	0
B4galt3	0.811251	0.126562	0.203	0.199	1	1.0201	0
N4bp2l2	0.395934	0.159888	0.459	0.45	1	1.02	0
Fam208b	0.792016	0.0889735	0.155	0.152	1	1.01974	0
Tmem57	0.767713	0.062533	0.416	0.408	1	1.01961	0
Nptx1	0.927544	0.0332279	0.208	0.204	1	1.01961	0
4833420G17Rik	0.837883	0.0137216	0.262	0.257	1	1.01946	0
Supt5	0.668388	0.0485183	0.368	0.361	1	1.01939	0
Hmgcr	0.618506	0.0607376	0.422	0.414	1	1.01932	0
Ppp1r2	0.620299	0.0785407	0.528	0.518	1	1.01931	0
Kcnk3	0.711882	0.0451652	0.213	0.209	1	1.01914	0
AW209491	0.823363	0.0488134	0.213	0.209	1	1.01914	0
H2-Ke6	0.907426	0.0273293	0.16	0.157	1	1.01911	0
Vps37d	0.918424	0.0144535	0.16	0.157	1	1.01911	0
Rps27a	0.128366	0.0640277	0.912	0.895	1	1.01899	0
Mrpl38	0.970336	0.0544745	0.325	0.319	1	1.01881	0
Pdia3	0.376951	0.20612	0.437	0.429	1	1.01865	0
Xpr1	0.567549	0.0411571	0.603	0.592	1	1.01858	0
Myadm	0.878747	0.0584741	0.165	0.162	1	1.01852	0
Tex261	0.902677	0.0538616	0.165	0.162	1	1.01852	0
Krtcap2	0.651082	0.0756496	0.389	0.382	1	1.01832	0
Pcnx4	0.772018	0.0477486	0.224	0.22	1	1.01818	0
Tob2	0.845028	0.0503364	0.112	0.11	1	1.01818	0
Tapt1	0.958221	0.00968733	0.112	0.11	1	1.01818	0
Dis3l2	0.967786	0.0182848	0.112	0.11	1	1.01818	0
Hnrnph1	0.252142	0.0893775	0.677	0.665	1	1.01805	0
Usp32	0.910418	0.0485723	0.341	0.335	1	1.01791	0
Gnaz	0.593964	0.0526899	0.512	0.503	1	1.01789	0
Sprn	0.959116	0.0236241	0.171	0.168	1	1.01786	0
Tbc1d23	0.932758	0.00733194	0.229	0.225	1	1.01778	0
Chchd4	0.119699	0.14653	0.575	0.565	1	1.0177	0
Cyp46a1	0.714968	0.10834	0.288	0.283	1	1.01767	0
Atp1a1	0.629788	0.137067	0.405	0.398	1	1.01759	0
Gspt1	0.758391	0.0611387	0.234	0.23	1	1.01739	0
Rnf20	0.773202	0.0740949	0.234	0.23	1	1.01739	0
Krt10	0.819833	0.109847	0.234	0.23	1	1.01739	0
Impa1	0.934067	0.0165721	0.234	0.23	1	1.01739	0
Plpbp	0.823344	0.0573894	0.293	0.288	1	1.01736	0
Actn1	0.695006	0.101982	0.176	0.173	1	1.01734	0
Msl2	0.808651	0.0505425	0.176	0.173	1	1.01734	0
Huwe1	0.535147	0.0666349	0.65	0.639	1	1.01721	0
Dnajb2	0.884536	0.0498773	0.303	0.298	1	1.01678	0
Hs6st1	0.838207	0.0869602	0.122	0.12	1	1.01667	0
Eid2	0.9619	0.0152378	0.122	0.12	1	1.01667	0
Tmf1	0.874216	0.0686968	0.245	0.241	1	1.0166	0
Rpl10a	0.0723075	0.0749687	0.825	0.812	1	1.01601	0
Rpl13	0.574397	0.0275267	0.952	0.937	1	1.01601	0
Npc2	0.969879	0.0400824	0.191	0.188	1	1.01596	0
Hspa4	0.788213	0.0342586	0.388	0.382	1	1.01571	0
Mark2	0.615601	0.0883421	0.324	0.319	1	1.01567	0
Cnih2	0.0670499	0.167407	0.59	0.581	1	1.01549	0
Zfp639	0.778118	0.0839423	0.197	0.194	1	1.01546	0
Atp1b3	0.139225	0.188699	0.532	0.524	1	1.01527	0
R3hdm2	0.637305	0.0809801	0.266	0.262	1	1.01527	0
Ltn1	0.908165	0.0192993	0.133	0.131	1	1.01527	0
Wdr60	0.914614	0.0362059	0.133	0.131	1	1.01527	0
Spg7	0.94523	0.0197335	0.133	0.131	1	1.01527	0
[truncated: 1,819 more rows]

## Sheet: male_Vgat_matecluster_marker
	p_val	avg_logFC	pct.1	pct.2	p_val_adj	ratio	log_p
Prlr	3.41978e-41	0.765364	0.656	0.319	6.95755e-37	2.05643	83.2558
Itm2c	3.86645e-34	0.475743	0.951	0.934	7.8663e-30	1.0182	67.015
Nts	3.59337e-30	0.96116	0.296	0.043	7.31072e-26	6.88372	57.8779
Esr1	2.04788e-28	0.446	0.253	0.021	4.16641e-24	12.0476	53.835
Pgr	5.09132e-24	0.480188	0.418	0.173	1.03583e-19	2.41618	43.7139
Grik1	6.76692e-22	0.536774	0.411	0.169	1.37673e-17	2.43195	38.8242
Ecel1	7.99809e-21	0.58536	0.564	0.346	1.62721e-16	1.63006	36.3545
Lrp1b	1.59219e-20	0.561368	0.716	0.551	3.23931e-16	1.29946	35.666
Ar	1.96971e-20	0.499415	0.553	0.344	4.00737e-16	1.60756	35.4532
Pcdh17	5.30014e-20	0.38371	0.893	0.86	1.07831e-15	1.03837	34.4634
Tmem215	1.19238e-19	0.399688	0.216	0.035	2.4259e-15	6.17143	33.6526
Lamp5	1.50867e-19	0.319124	0.165	0.006	3.06939e-15	27.5	33.4173
C1ql3	1.81042e-19	0.537948	0.206	0.031	3.6833e-15	6.64516	33.235
Sv2c	3.26709e-19	0.464424	0.35	0.134	6.64689e-15	2.61194	32.6446
Calb1	1.15644e-17	0.614213	0.374	0.173	2.35277e-13	2.16185	29.078
Il1rap	4.08374e-17	0.38184	0.242	0.064	8.30837e-13	3.78125	27.8163
Lsamp	6.02706e-17	0.369593	0.898	0.858	1.2262e-12	1.04662	27.4271
Ntng1	5.9137e-16	0.643526	0.383	0.187	1.20314e-11	2.04813	25.1435
Pcp4	2.64765e-15	0.493085	0.875	0.815	5.38664e-11	1.07362	23.6445
Irs4	3.77515e-15	0.467349	0.545	0.366	7.68055e-11	1.48907	23.2897
Tmem35a	5.99829e-15	0.462936	0.387	0.208	1.22035e-10	1.86058	22.8267
Id4	6.15968e-15	0.446309	0.44	0.259	1.25319e-10	1.69884	22.8002
Scg2	1.83998e-14	0.374752	0.87	0.831	3.74344e-10	1.04693	21.7058
Cntnap2	8.29669e-14	0.351437	0.716	0.595	1.68796e-09	1.20336	20.1997
Pcdh20	1.65078e-13	0.272517	0.251	0.091	3.35851e-09	2.75824	19.5118
Chl1	3.08862e-13	0.405454	0.584	0.403	6.2838e-09	1.44913	18.8853
Ngb	3.23738e-13	0.348129	0.52	0.325	6.58644e-09	1.6	18.8383
Hap1	4.22038e-13	0.229757	0.896	0.893	8.58636e-09	1.00336	18.5731
Gpr101	7.75531e-13	0.470952	0.387	0.208	1.57782e-08	1.86058	17.9646
Gaa	3.33804e-12	0.275635	0.89	0.885	6.79123e-08	1.00565	16.505
Cadps2	7.22199e-12	0.354457	0.281	0.128	1.46931e-07	2.19531	15.7333
Tmem130	9.5599e-12	0.209831	0.956	0.967	1.94496e-07	0.988625	15.4529
Fndc9	1.30647e-11	0.267415	0.286	0.126	2.65801e-07	2.26984	15.1405
Nr2f2	1.35589e-11	0.39268	0.38	0.216	2.75855e-07	1.75926	15.1034
Amigo2	1.39863e-11	0.344414	0.293	0.138	2.84551e-07	2.12319	15.0724
Sez6l	1.57954e-11	0.368387	0.712	0.609	3.21357e-07	1.16913	14.9507
Crim1	1.70917e-11	0.343712	0.498	0.329	3.4773e-07	1.51368	14.8718
Fut8	2.47234e-11	0.327573	0.391	0.228	5.02997e-07	1.71491	14.5027
Nell1	3.45134e-11	0.323254	0.35	0.187	7.02176e-07	1.87166	14.1691
Pcdh7	7.78205e-11	0.359107	0.575	0.432	1.58326e-06	1.33102	13.356
Zfhx4	8.63025e-11	0.352217	0.383	0.233	1.75582e-06	1.64378	13.2526
Greb1	1.11021e-10	0.2648	0.145	0.035	2.25873e-06	4.14286	13.0007
Gpx3	2.49939e-10	0.385952	0.607	0.496	5.08501e-06	1.22379	12.1892
Scn5a	4.83731e-10	0.196146	0.168	0.051	9.84151e-06	3.29412	11.5289
Hs3st5	6.264e-10	0.196143	0.212	0.082	1.27441e-05	2.58537	11.2704
Ets2	8.56863e-10	0.267463	0.435	0.282	1.74329e-05	1.54255	10.9572
Ly6h	1.07503e-09	0.304302	0.943	0.926	2.18715e-05	1.01836	10.7303
Ptprg	1.48484e-09	0.253025	0.314	0.171	3.0209e-05	1.83626	10.4074
Pdzrn4	2.01377e-09	0.406684	0.418	0.292	4.09701e-05	1.43151	10.1027
Cdh2	2.96647e-09	0.333168	0.618	0.504	6.03527e-05	1.22619	9.7153
1500009L16Rik	3.07809e-09	0.328469	0.575	0.444	6.26238e-05	1.29505	9.67837
Hmx2	5.2047e-09	0.163692	0.138	0.039	0.00010589	3.53846	9.15311
mt-Cytb	6.26699e-09	0.158779	0.995	0.998	0.000127502	0.996994	8.96738
Gal	7.93852e-09	0.124696	0.343	0.171	0.000161509	2.00585	8.73095
mt-Nd4	8.81626e-09	0.184227	0.993	0.996	0.000179367	0.996988	8.62608
Maged1	1.22274e-08	0.259244	0.826	0.813	0.000248767	1.01599	8.29899
Nell2	1.47826e-08	0.311123	0.375	0.239	0.000300751	1.56904	8.10923
Galnt16	1.88473e-08	0.265756	0.647	0.549	0.000383449	1.17851	7.8663
Bub3	2.1017e-08	0.286727	0.533	0.405	0.00042759	1.31605	7.75735
Kcnab1	2.68411e-08	0.216667	0.204	0.091	0.000546082	2.24176	7.51274
Gpr83	2.72655e-08	0.238055	0.148	0.049	0.000554717	3.02041	7.49705
Olfm3	3.24169e-08	0.244846	0.316	0.179	0.000659523	1.76536	7.32399
Brinp2	3.65044e-08	0.310018	0.347	0.218	0.000742682	1.59174	7.20524
Pnoc	4.41574e-08	0.314773	0.267	0.146	0.000898383	1.82877	7.01491
Pak3	4.49973e-08	0.246398	0.791	0.823	0.00091547	0.961118	6.99607
Acp1	4.93329e-08	0.40562	0.812	0.755	0.00100368	1.0755	6.90408
Spock1	5.18783e-08	0.36019	0.616	0.504	0.00105546	1.22222	6.85377
Parm1	6.71204e-08	0.251167	0.375	0.247	0.00136556	1.51822	6.59619
Gpr165	7.74644e-08	0.201279	0.133	0.043	0.00157601	3.09302	6.45286
Rspo1	8.51789e-08	0.199512	0.209	0.097	0.00173296	2.15464	6.35792
Kcnh1	1.09819e-07	0.203377	0.273	0.146	0.00223426	1.86986	6.10385
Nrxn1	1.17009e-07	0.202088	0.887	0.856	0.00238055	1.03621	6.04042
Fus	1.29379e-07	0.342356	0.865	0.805	0.00263222	1.07453	5.93993
Calcr	1.36258e-07	0.385248	0.155	0.062	0.00277216	2.5	5.88813
Tenm1	1.52435e-07	0.24508	0.591	0.449	0.0031013	1.31626	5.77593
Fam107a	1.54934e-07	0.136936	0.14	0.049	0.00315213	2.85714	5.75968
Gm27199	1.76863e-07	0.155745	0.109	0.029	0.00359829	3.75862	5.6273
Dlx1	1.862e-07	0.22224	0.531	0.395	0.00378824	1.3443	5.57585
Sv2b	1.86556e-07	0.196126	0.13	0.043	0.00379547	3.02326	5.57395
Nrip1	1.99167e-07	0.274033	0.274	0.16	0.00405205	1.7125	5.50853
B4galt6	2.68032e-07	0.189246	0.816	0.778	0.00545312	1.04884	5.21157
Negr1	3.84964e-07	0.239758	0.818	0.786	0.0078321	1.04071	4.84952
Apoc3	4.0189e-07	0.152591	0.191	0.086	0.00817645	2.22093	4.8065
Adgrl3	4.03274e-07	0.280958	0.53	0.405	0.0082046	1.30864	4.80306
Fgfr1	5.89914e-07	0.282147	0.414	0.282	0.0120018	1.46809	4.4227
Gria2	6.27654e-07	0.190422	0.984	0.973	0.0127696	1.01131	4.36069
App	7.72817e-07	0.204832	0.926	0.93	0.015723	0.995699	4.15263
Gabrq	7.94148e-07	0.268247	0.497	0.362	0.0161569	1.37293	4.12541
Ogt	1.25877e-06	0.412066	0.891	0.895	0.0256096	0.995531	3.66479
Asb4	1.45686e-06	0.320694	0.26	0.156	0.0296397	1.66667	3.51864
mt-Co1	1.55891e-06	0.130263	0.996	1	0.031716	0.996	3.45094
Podxl2	1.80621e-06	0.25101	0.811	0.767	0.0367474	1.05737	3.30369
Lpp	2.08124e-06	0.160492	0.17	0.078	0.0423429	2.17949	3.16196
Clmn	2.09567e-06	0.154738	0.222	0.117	0.0426363	1.89744	3.15505
mt-Co3	2.92029e-06	0.161207	0.999	1	0.0594132	0.999	2.82324
Gabre	3.29187e-06	0.234891	0.339	0.222	0.066973	1.52703	2.70347
Zmym1	3.42876e-06	0.351454	0.517	0.405	0.0697582	1.27654	2.66272
Npy1r	4.66566e-06	0.172834	0.126	0.051	0.0949228	2.47059	2.35469
H2-Q2	4.80596e-06	0.153663	0.107	0.037	0.0977772	2.89189	2.32506
Dpp6	4.99334e-06	0.169142	0.759	0.673	0.10159	1.12779	2.28681
Npdc1	5.19138e-06	0.268304	0.654	0.56	0.105619	1.16786	2.24792
mt-Nd1	5.29426e-06	0.151735	0.996	1	0.107712	0.996	2.2283
Cacna1e	5.70388e-06	0.249261	0.584	0.486	0.116045	1.20165	2.15377
Efna5	6.47509e-06	0.242236	0.6	0.5	0.131736	1.2	2.02696
Ppm1m	6.64008e-06	0.160338	0.17	0.082	0.135092	2.07317	2.0018
Fgf1	6.79196e-06	0.107081	0.107	0.037	0.138183	2.89189	1.97918
Cartpt	7.13254e-06	0.465251	0.159	0.078	0.145111	2.03846	1.93025
Sorcs1	7.37682e-06	0.256366	0.276	0.177	0.150081	1.55932	1.89658
Sccpdh	8.36419e-06	0.215908	0.444	0.333	0.170169	1.33333	1.77096
Fam171b	8.72815e-06	0.22266	0.772	0.745	0.177574	1.03624	1.72837
Tmx4	8.75916e-06	0.144452	0.913	0.94	0.178205	0.971277	1.72482
Gm42851	9.08518e-06	0.255312	0.234	0.138	0.184838	1.69565	1.68828
Gdpd2	1.08032e-05	0.144485	0.128	0.053	0.219792	2.41509	1.51508
Tnfrsf21	1.10101e-05	0.227632	0.431	0.321	0.224	1.34268	1.49611
Fth1	1.14186e-05	0.107531	0.978	0.996	0.232312	0.981928	1.45967
mt-Atp6	1.31957e-05	0.150739	1	1	0.268466	1	1.31503
Lrfn5	1.33445e-05	0.288216	0.731	0.658	0.271494	1.11094	1.30382
Rnf112	1.3465e-05	0.231119	0.525	0.42	0.273946	1.25	1.29482
Sh3rf1	1.42875e-05	0.108458	0.16	0.078	0.290679	2.05128	1.23554
Oprk1	1.46574e-05	0.250042	0.313	0.2	0.298205	1.565	1.20997
Cacna2d1	1.53895e-05	0.2509	0.187	0.103	0.313099	1.81553	1.16124
Timp2	1.70566e-05	0.172883	0.918	0.914	0.347017	1.00438	1.05838
Zmat4	1.74434e-05	0.201591	0.375	0.265	0.354885	1.41509	1.03596
Asic2	1.82004e-05	0.132792	0.364	0.243	0.370288	1.49794	0.993475
Kcns2	1.8806e-05	0.166168	0.162	0.08	0.382608	2.025	0.960744
Mboat7	1.90381e-05	0.214541	0.71	0.656	0.387329	1.08232	0.94848
Stc1	1.99141e-05	0.127924	0.111	0.043	0.405152	2.5814	0.903493
Thy1	2.16891e-05	0.148492	0.758	0.675	0.441265	1.12296	0.81811
Pcdh10	2.3433e-05	0.20584	0.56	0.434	0.476745	1.29032	0.740773
Unc5a	2.35573e-05	0.171991	0.259	0.165	0.479273	1.5697	0.735484
Saraf	2.42094e-05	0.196361	0.774	0.739	0.492541	1.04736	0.708178
Cbarp	2.44652e-05	0.126661	0.926	0.936	0.497745	0.989316	0.697666
Npy2r	2.56596e-05	0.1188	0.267	0.16	0.522045	1.66875	0.650002
Isl1	2.66522e-05	0.223085	0.272	0.175	0.54224	1.55429	0.612047
Cbln4	3.56846e-05	0.12634	0.177	0.093	0.726002	1.90323	0.320202
Rcn1	4.71865e-05	0.193122	0.293	0.198	0.96001	1.4798	0.0408118
Hdac7	4.92151e-05	0.186412	0.337	0.23	1	1.46522	0
Pcbd1	4.93401e-05	0.144362	0.459	0.344	1	1.3343	0
Atp8a1	5.72318e-05	0.240505	0.725	0.663	1	1.09351	0
Gm44644	5.99619e-05	0.266371	0.738	0.663	1	1.11312	0
Gramd1a	6.05637e-05	0.24334	0.395	0.298	1	1.3255	0
Vwa5b2	6.363e-05	0.205251	0.332	0.233	1	1.42489	0
Grik2	6.46308e-05	0.158463	0.299	0.2	1	1.495	0
Htr1b	6.75722e-05	0.12248	0.175	0.095	1	1.84211	0
Scml4	7.16927e-05	0.122952	0.171	0.093	1	1.83871	0
Kcnj3	7.31245e-05	0.179256	0.305	0.204	1	1.4951	0
Cadm1	7.43877e-05	0.188267	0.869	0.825	1	1.05333	0
Cpne7	7.57877e-05	0.224824	0.312	0.21	1	1.48571	0
Nexmif	8.26878e-05	0.178875	0.425	0.323	1	1.31579	0
Hps1	8.8703e-05	0.115259	0.113	0.049	1	2.30612	0
Sox2	8.89764e-05	0.20653	0.321	0.226	1	1.42035	0
Thbs3	9.65646e-05	0.131158	0.118	0.053	1	2.22642	0
Pam	0.00010554	0.398747	0.562	0.484	1	1.16116	0
Zcchc18	0.000111207	0.154505	0.881	0.87	1	1.01264	0
Aplp1	0.000112376	0.150797	0.854	0.846	1	1.00946	0
Nlgn3	0.000118256	0.173914	0.643	0.549	1	1.17122	0
Pcp4l1	0.000118443	0.0824038	0.109	0.047	1	2.31915	0
Rgs11	0.000130715	0.145244	0.175	0.101	1	1.73267	0
Cd83	0.000138828	0.213208	0.402	0.313	1	1.28435	0
Ghr	0.000141794	0.148869	0.126	0.062	1	2.03226	0
Rgp1	0.000150325	0.0758693	0.113	0.051	1	2.21569	0
Lypd1	0.000162484	0.282513	0.258	0.175	1	1.47429	0
Neo1	0.000169651	0.193873	0.29	0.202	1	1.43564	0
Nsg1	0.000170665	0.123268	0.881	0.874	1	1.00801	0
Faim2	0.000171445	0.162236	0.9	0.932	1	0.965665	0
Naaa	0.000174603	0.136474	0.195	0.115	1	1.69565	0
Kalrn	0.000185569	0.20263	0.516	0.418	1	1.23445	0
Drp2	0.000196654	0.172464	0.198	0.121	1	1.63636	0
Snhg11	0.000203595	0.188137	0.998	0.996	1	1.00201	0
Dlg5	0.00021409	0.100372	0.149	0.08	1	1.8625	0
Col25a1	0.000214389	0.268417	0.307	0.218	1	1.40826	0
Zbtb20	0.000216255	0.285333	0.785	0.78	1	1.00641	0
Gas6	0.000223655	0.251746	0.293	0.206	1	1.42233	0
Lingo2	0.000225454	0.342469	0.571	0.498	1	1.14659	0
Ptchd4	0.000237697	0.190043	0.236	0.154	1	1.53247	0
Pde4d	0.000241431	0.155626	0.2	0.121	1	1.65289	0
Chst11	0.000249905	0.142209	0.233	0.152	1	1.53289	0
Nebl	0.000254706	0.199789	0.449	0.352	1	1.27557	0
Nrxn3	0.000267528	0.12765	0.963	0.977	1	0.98567	0
Spock3	0.000286677	0.219852	0.566	0.469	1	1.20682	0
Gpd2	0.000291649	0.130129	0.398	0.305	1	1.30492	0
Wnt4	0.000304746	0.10041	0.125	0.062	1	2.01613	0
Sirpa	0.000315865	0.208525	0.558	0.488	1	1.14344	0
Pag1	0.00033703	0.11239	0.138	0.074	1	1.86486	0
Bsg	0.000349436	0.193438	0.743	0.7	1	1.06143	0
Rgs2	0.00035079	0.16421	0.316	0.228	1	1.38596	0
Fam126a	0.000352949	0.101913	0.121	0.062	1	1.95161	0
Chst1	0.000359255	0.169508	0.476	0.387	1	1.22997	0
Gabra3	0.000373538	0.203193	0.516	0.432	1	1.19444	0
Hs2st1	0.000380248	0.200979	0.48	0.401	1	1.19701	0
Gabrg1	0.000380722	0.214987	0.447	0.352	1	1.26989	0
Lzts1	0.000389503	0.137089	0.163	0.097	1	1.68041	0
Slc22a17	0.000417693	0.185897	0.858	0.858	1	1	0
Rgs17	0.0004235	0.121012	0.709	0.677	1	1.04727	0
Sulf1	0.000432563	0.12013	0.115	0.058	1	1.98276	0
mt-Nd5	0.000440415	0.166814	0.879	0.899	1	0.977753	0
Shisa9	0.000461701	0.172168	0.388	0.294	1	1.31973	0
Atp2b4	0.000471398	0.160836	0.344	0.251	1	1.37052	0
Grin2a	0.000512966	0.207005	0.275	0.193	1	1.42487	0
Camkk1	0.000516224	0.108833	0.272	0.189	1	1.43915	0
Slc12a5	0.000523445	0.147159	0.867	0.848	1	1.02241	0
Stx1a	0.000526165	0.133412	0.219	0.142	1	1.54225	0
Pou2f2	0.000560563	0.11231	0.434	0.323	1	1.34365	0
Syndig1l	0.000598573	0.103242	0.119	0.062	1	1.91935	0
Clmp	0.000600755	0.189813	0.34	0.257	1	1.32296	0
Gabrb3	0.000606975	0.18503	0.713	0.66	1	1.0803	0
Adcy5	0.000610391	0.171256	0.407	0.317	1	1.28391	0
Ikzf2	0.000614858	0.1268	0.149	0.084	1	1.77381	0
Sptbn1	0.000621577	0.159979	0.852	0.829	1	1.02774	0
Orai2	0.00066868	0.125411	0.221	0.144	1	1.53472	0
Tshz2	0.000674869	0.22015	0.596	0.547	1	1.08958	0
Cnnm1	0.000685187	0.140036	0.475	0.374	1	1.27005	0
Smim1	0.00068926	0.115389	0.234	0.156	1	1.5	0
Slc35f4	0.00073198	0.158874	0.181	0.115	1	1.57391	0
Mcmdc2	0.000733501	0.166261	0.128	0.07	1	1.82857	0
Tmod1	0.000767083	0.131574	0.149	0.086	1	1.73256	0
Gabra2	0.000779192	0.245278	0.585	0.535	1	1.09346	0
Atp2b1	0.000812252	0.227926	0.771	0.759	1	1.01581	0
Susd2	0.000815642	0.0965043	0.143	0.08	1	1.7875	0
Fbxo10	0.000825277	0.149215	0.367	0.278	1	1.32014	0
Galnt13	0.000867779	0.145671	0.312	0.23	1	1.35652	0
Gm12258	0.000981643	0.0943756	0.127	0.07	1	1.81429	0
Fstl1	0.00102084	0.0912977	0.105	0.053	1	1.98113	0
2900055J20Rik	0.00103672	0.00791248	0.346	0.451	1	0.767184	0
2610008E11Rik	0.00108545	0.195118	0.211	0.142	1	1.48592	0
Prnp	0.00111293	0.156005	0.898	0.901	1	0.99667	0
Edil3	0.00113579	0.205035	0.528	0.436	1	1.21101	0
Wscd1	0.00119757	0.106152	0.185	0.119	1	1.55462	0
Rtl8a	0.0012024	0.130021	0.924	0.924	1	1	0
Map3k5	0.00120854	0.075307	0.153	0.091	1	1.68132	0
Atp6v0b	0.00126246	0.24837	0.825	0.796	1	1.03643	0
Cntnap4	0.00126585	0.152313	0.318	0.235	1	1.35319	0
Erich3	0.00126738	0.107504	0.24	0.165	1	1.45455	0
Atp1a1	0.00129858	0.192273	0.505	0.422	1	1.19668	0
Gadd45a	0.00132947	0.0775394	0.115	0.062	1	1.85484	0
Ryr2	0.001339	0.146321	0.37	0.276	1	1.34058	0
Whrn	0.00137648	0.15183	0.154	0.095	1	1.62105	0
Ssr4	0.00137998	0.201809	0.56	0.481	1	1.16424	0
Mkl2	0.00141169	0.210171	0.513	0.453	1	1.13245	0
mt-Co2	0.00142118	0.147088	0.995	1	1	0.995	0
Kcnd2	0.00144765	0.185437	0.484	0.397	1	1.21914	0
5031439G07Rik	0.00145652	0.166203	0.339	0.257	1	1.31907	0
Nectin3	0.00147078	0.0872146	0.142	0.082	1	1.73171	0
Hcn1	0.00148677	0.148863	0.338	0.263	1	1.28517	0
Mast3	0.00153378	0.0856713	0.282	0.195	1	1.44615	0
Usp13	0.00157046	0.0799747	0.239	0.158	1	1.51266	0
Glra3	0.00157457	0.152078	0.27	0.195	1	1.38462	0
Zdhhc18	0.00157997	0.0948622	0.125	0.07	1	1.78571	0
Arxes1	0.00160441	0.140709	0.327	0.247	1	1.32389	0
Fxyd7	0.00160715	0.19983	0.33	0.253	1	1.30435	0
Large1	0.001655	0.120366	0.376	0.288	1	1.30556	0
Actb	0.00168795	0.159181	0.931	0.949	1	0.981033	0
Plekhb1	0.00171972	0.0869052	0.157	0.095	1	1.65263	0
Plxdc2	0.00173371	0.145365	0.191	0.128	1	1.49219	0
Ocrl	0.00174509	0.195911	0.574	0.508	1	1.12992	0
Gria1	0.00174969	0.190329	0.716	0.683	1	1.04832	0
Lrrtm4	0.0017655	0.111178	0.205	0.138	1	1.48551	0
Gm47283	0.00178286	0.213065	0.509	0.426	1	1.19484	0
Jam3	0.00183032	0.204647	0.322	0.245	1	1.31429	0
Rbm4b	0.00184891	0.351636	0.689	0.652	1	1.05675	0
Nr2f1	0.00191914	0.100721	0.112	0.062	1	1.80645	0
Ppt1	0.00194345	0.196236	0.572	0.496	1	1.15323	0
Lgi1	0.00200195	0.158845	0.293	0.22	1	1.33182	0
Tia1	0.00205177	0.219046	0.828	0.823	1	1.00608	0
Kcnk2	0.0020548	0.168172	0.591	0.523	1	1.13002	0
Plppr3	0.00206759	0.200479	0.414	0.337	1	1.22849	0
Ankrd55	0.00207442	0.0812423	0.112	0.062	1	1.80645	0
Tmem64	0.00210683	0.139094	0.284	0.212	1	1.33962	0
Zfhx3	0.002179	0.119604	0.722	0.648	1	1.1142	0
Miat	0.00221434	0.211652	0.513	0.449	1	1.14254	0
Cdh22	0.00223418	0.0659702	0.183	0.119	1	1.53782	0
Tug1	0.00235749	0.164282	0.566	0.502	1	1.12749	0
Galnt17	0.00237229	0.0860093	0.337	0.249	1	1.35341	0
Zdhhc20	0.00240459	0.177432	0.652	0.615	1	1.06016	0
Htr7	0.00241232	0.112265	0.146	0.091	1	1.6044	0
Pde8b	0.0024603	0.139255	0.306	0.239	1	1.28033	0
Ifngr2	0.00254705	0.116326	0.248	0.173	1	1.43353	0
Sema4d	0.00256577	0.120299	0.229	0.16	1	1.43125	0
Grm7	0.00259837	0.16178	0.27	0.198	1	1.36364	0
Sorbs2	0.00268476	0.174549	0.396	0.325	1	1.21846	0
2900093K20Rik	0.00273292	0.148855	0.19	0.13	1	1.46154	0
Rps6ka4	0.0027547	0.0701216	0.111	0.062	1	1.79032	0
Tmem231	0.00280142	0.091951	0.149	0.093	1	1.60215	0
Adam23	0.00280371	0.196912	0.46	0.383	1	1.20104	0
Dlgap2	0.00283362	0.0921489	0.11	0.062	1	1.77419	0
Gabra5	0.00285081	0.16242	0.296	0.22	1	1.34545	0
Mmp17	0.00297427	0.0967278	0.26	0.185	1	1.40541	0
Adgrl1	0.00298924	0.152609	0.81	0.807	1	1.00372	0
Gpm6b	0.00301187	0.199553	0.367	0.294	1	1.2483	0
Lrrc8b	0.00301572	0.0891812	0.128	0.076	1	1.68421	0
Clu	0.00307201	0.162592	0.403	0.329	1	1.22492	0
Ptprn	0.00317039	0.176034	0.817	0.798	1	1.02381	0
Plec	0.00321244	0.0995571	0.225	0.156	1	1.44231	0
Ahctf1	0.0032131	0.122614	0.244	0.175	1	1.39429	0
Nptxr	0.00322692	0.16151	0.667	0.648	1	1.02932	0
Cpe	0.00329801	0.149035	0.866	0.881	1	0.982974	0
Camk2b	0.00331775	0.103211	0.812	0.856	1	0.948598	0
Adra2a	0.00332914	0.136013	0.156	0.101	1	1.54455	0
Tle2	0.00335665	0.120524	0.128	0.078	1	1.64103	0
Ptpru	0.00338022	0.116955	0.177	0.117	1	1.51282	0
Fam189a2	0.0033894	0.0897031	0.12	0.07	1	1.71429	0
Ccnt2	0.00345893	0.256118	0.762	0.733	1	1.03956	0
Gabrg2	0.0036123	0.15968	0.649	0.599	1	1.08347	0
Tspan17	0.00372254	0.158476	0.29	0.22	1	1.31818	0
Npr2	0.00377698	0.106583	0.19	0.13	1	1.46154	0
Pfkfb4	0.00379205	0.102788	0.148	0.095	1	1.55789	0
2310022A10Rik	0.00379492	0.0953628	0.159	0.103	1	1.54369	0
Pianp	0.00403223	0.133158	0.784	0.765	1	1.02484	0
Kcnip1	0.00407823	0.0930909	0.372	0.294	1	1.26531	0
Calr	0.00409762	0.129764	0.752	0.722	1	1.04155	0
Slc39a9	0.00411255	0.111428	0.31	0.235	1	1.31915	0
Ncam1	0.00414127	0.14205	0.982	0.986	1	0.995943	0
Lhfpl4	0.00416595	0.155031	0.653	0.609	1	1.07225	0
Pgrmc1	0.00425045	0.135265	0.92	0.918	1	1.00218	0
Thsd7a	0.00429448	0.168474	0.229	0.167	1	1.37126	0
1190002N15Rik	0.00431244	0.0987056	0.195	0.136	1	1.43382	0
Kcnk9	0.00440599	0.16476	0.386	0.317	1	1.21767	0
Rbfox3	0.00440697	0.149646	0.581	0.537	1	1.08194	0
Stk3	0.00450889	0.0530996	0.141	0.086	1	1.63953	0
Brinp3	0.00451861	0.187791	0.354	0.278	1	1.27338	0
Magi1	0.0045813	0.171829	0.558	0.502	1	1.11155	0
Camk2g	0.00477864	0.115672	0.623	0.576	1	1.0816	0
Fat3	0.00510189	0.166385	0.285	0.22	1	1.29545	0
Ptpn5	0.00513134	0.135666	0.586	0.527	1	1.11195	0
Fxyd2	0.00514819	0.108972	0.221	0.158	1	1.39873	0
mt-Nd2	0.00533817	0.0896213	0.99	0.998	1	0.991984	0
Tmem179	0.00539472	0.177024	0.695	0.683	1	1.01757	0
Hs6st2	0.00544873	0.16384	0.491	0.432	1	1.13657	0
Cdkl5	0.00546699	0.0993642	0.369	0.288	1	1.28125	0
Lrrn2	0.0054743	0.1423	0.325	0.253	1	1.28458	0
Psap	0.0055033	0.0947081	0.912	0.932	1	0.978541	0
Myadm	0.0055103	0.0670174	0.117	0.07	1	1.67143	0
Itfg1	0.00567649	0.148743	0.681	0.648	1	1.05093	0
Cdr2	0.0056913	0.0637605	0.111	0.066	1	1.68182	0
Dlx2	0.00569896	0.101555	0.3	0.228	1	1.31579	0
Prkce	0.0058555	0.164634	0.624	0.599	1	1.04174	0
Rab27b	0.00588631	0.111574	0.489	0.409	1	1.1956	0
Fam46a	0.00595608	0.101628	0.16	0.105	1	1.52381	0
Enpp2	0.00600737	0.117355	0.117	0.072	1	1.625	0
Golga7b	0.0060184	0.12561	0.471	0.399	1	1.18045	0
2700097O09Rik	0.00603317	0.000522779	0.238	0.307	1	0.775244	0
Cd24a	0.00604174	0.081335	0.129	0.08	1	1.6125	0
Psd3	0.00607973	0.121532	0.565	0.519	1	1.08863	0
Phkb	0.00619069	0.0927093	0.188	0.13	1	1.44615	0
Zfp112	0.00630152	0.191906	0.25	0.187	1	1.3369	0
Ntpcr	0.00632498	0.0479131	0.115	0.068	1	1.69118	0
Ralgds	0.00640802	0.120389	0.225	0.158	1	1.42405	0
Syn2	0.00646262	0.126259	0.747	0.784	1	0.952806	0
Cbfb	0.00649167	0.0545751	0.213	0.146	1	1.4589	0
Cdkl2	0.00651374	0.132576	0.333	0.265	1	1.2566	0
Ak5	0.00653558	0.0822097	0.12	0.072	1	1.66667	0
Enah	0.00658915	0.157878	0.801	0.8	1	1.00125	0
Fam84a	0.00663831	0.10016	0.275	0.204	1	1.34804	0
2021-03-11	0.00669106	0.188477	0.15	0.099	1	1.51515	0
Szt2	0.00679332	0.0852155	0.124	0.076	1	1.63158	0
Ret	0.00683191	0.110714	0.153	0.101	1	1.51485	0
Mpp3	0.00700431	0.104767	0.153	0.103	1	1.48544	0
Plppr2	0.0073251	0.122449	0.436	0.364	1	1.1978	0
Appl2	0.00766646	0.0873723	0.114	0.07	1	1.62857	0
Nenf	0.00769419	0.141332	0.795	0.79	1	1.00633	0
Unc45a	0.00786631	0.111753	0.172	0.117	1	1.47009	0
Galnt9	0.00799399	0.0774181	0.112	0.068	1	1.64706	0
Msh2	0.0082105	0.105738	0.195	0.138	1	1.41304	0
Gnptab	0.00822381	0.116425	0.262	0.2	1	1.31	0
Ptprf	0.0082324	0.131036	0.555	0.496	1	1.11895	0
Ypel2	0.00827192	0.0710387	0.17	0.115	1	1.47826	0
Ciz1	0.00833892	0.0954612	0.116	0.072	1	1.61111	0
Scn2a	0.00835174	0.137662	0.895	0.897	1	0.99777	0
Usp51	0.0086254	0.145673	0.208	0.152	1	1.36842	0
Pomgnt2	0.00868163	0.0949585	0.227	0.167	1	1.35928	0
Derl2	0.00869496	0.112573	0.198	0.14	1	1.41429	0
Svop	0.00879188	0.15468	0.571	0.516	1	1.10659	0
Dock4	0.00893554	0.18104	0.246	0.189	1	1.30159	0
Ssr3	0.00896448	0.182943	0.561	0.508	1	1.10433	0
Cep89	0.00897604	0.0920882	0.125	0.078	1	1.60256	0
Sde2	0.00924601	0.0745328	0.236	0.175	1	1.34857	0
Adgrl2	0.0093835	0.121612	0.2	0.146	1	1.36986	0
Crip2	0.00945341	0.0857509	0.256	0.191	1	1.34031	0
Rnf145	0.0094726	0.106905	0.354	0.284	1	1.24648	0
Dnajc21	0.00958319	0.11404	0.371	0.305	1	1.21639	0
Plod3	0.00960814	0.0861792	0.106	0.064	1	1.65625	0
Wrb	0.00963888	0.157087	0.6	0.543	1	1.10497	0
Amotl1	0.00965261	0.141089	0.427	0.37	1	1.15405	0
Arhgap24	0.00994031	0.0754874	0.111	0.068	1	1.63235	0
Car10	0.0100661	0.211796	0.32	0.27	1	1.18519	0
Pisd	0.0101683	0.139622	0.257	0.195	1	1.31795	0
Glra2	0.0106469	0.145355	0.285	0.224	1	1.27232	0
Tmem158	0.0107814	0.18323	0.524	0.477	1	1.09853	0
Arsb	0.010791	0.128106	0.302	0.241	1	1.25311	0
Ndufaf7	0.0110011	0.0980145	0.209	0.15	1	1.39333	0
Usp29	0.0110291	0.119585	0.786	0.79	1	0.994937	0
Ccnb1ip1	0.0112413	0.191686	0.263	0.208	1	1.26442	0
Magel2	0.0113604	0.134341	0.375	0.309	1	1.21359	0
Ncor2	0.0113833	0.109059	0.368	0.298	1	1.2349	0
Gm42517	0.0113834	0.0689598	0.104	0.064	1	1.625	0
Sin3b	0.0114511	0.112768	0.365	0.294	1	1.2415	0
Dlk2	0.0114541	0.106724	0.135	0.091	1	1.48352	0
Chml	0.011568	0.0766529	0.117	0.074	1	1.58108	0
Tmem132a	0.0116381	0.0626981	0.174	0.121	1	1.43802	0
Adcy7	0.0116394	0.0798764	0.178	0.126	1	1.4127	0
Reln	0.011698	0.118275	0.153	0.105	1	1.45714	0
Camk1	0.01173	0.218062	0.468	0.412	1	1.13592	0
Degs1	0.0119219	0.136235	0.313	0.251	1	1.24701	0
Ptpro	0.0120502	0.171	0.427	0.368	1	1.16033	0
2021-09-01	0.0122137	0.0975341	0.124	0.08	1	1.55	0
Lingo1	0.0122909	0.136204	0.328	0.257	1	1.27626	0
Actn1	0.0123582	0.115558	0.244	0.189	1	1.29101	0
Nedd4l	0.0124325	0.101891	0.379	0.313	1	1.21086	0
Cdh12	0.0124745	0.0891104	0.124	0.08	1	1.55	0
Adgrb3	0.0129047	0.171905	0.62	0.584	1	1.06164	0
Trim8	0.0129388	0.0868768	0.265	0.206	1	1.28641	0
Rgs4	0.0129541	0.211152	0.353	0.305	1	1.15738	0
Gkap1	0.0130669	0.174123	0.404	0.352	1	1.14773	0
Syt6	0.0132568	0.122371	0.191	0.14	1	1.36429	0
Lrig2	0.0132706	0.111012	0.272	0.21	1	1.29524	0
Ccnl1	0.0133313	0.114981	0.396	0.327	1	1.21101	0
Ctu2	0.0135917	0.141414	0.135	0.093	1	1.45161	0
Gad2	0.0137346	0.0805853	0.892	0.944	1	0.944915	0
Mettl1	0.0137865	0.0768009	0.16	0.109	1	1.46789	0
Sephs2	0.0140774	0.11593	0.303	0.243	1	1.24691	0
Kidins220	0.0141081	0.118873	0.726	0.702	1	1.03419	0
Tmtc4	0.0141795	0.0886238	0.171	0.121	1	1.41322	0
Sox11	0.0142261	0.14911	0.591	0.549	1	1.0765	0
Cdh4	0.0142571	0.0815646	0.234	0.173	1	1.3526	0
Hapln4	0.0142846	0.121232	0.37	0.298	1	1.24161	0
Syt5	0.0143014	0.140457	0.424	0.358	1	1.18436	0
Greb1l	0.0143937	0.104456	0.179	0.13	1	1.37692	0
Rab15	0.0145168	0.109173	0.397	0.335	1	1.18507	0
Rybp	0.0146343	0.0947051	0.289	0.224	1	1.29018	0
Fads3	0.0148378	0.0714033	0.11	0.07	1	1.57143	0
Mvb12a	0.0149235	0.144688	0.222	0.169	1	1.31361	0
Plekhg5	0.0149787	0.0493146	0.132	0.086	1	1.53488	0
Rabif	0.0150438	0.0587223	0.183	0.13	1	1.40769	0
Tnks2	0.0150766	0.118892	0.371	0.311	1	1.19293	0
Dscam	0.0153671	0.148727	0.47	0.418	1	1.1244	0
Lrrtm3	0.0153774	0.176365	0.472	0.412	1	1.14563	0
Rbm39	0.0155492	0.168727	0.967	0.971	1	0.995881	0
Ackr1	0.0155925	0.107842	0.272	0.212	1	1.28302	0
Tmem255a	0.0156136	0.17045	0.703	0.652	1	1.07822	0
Tecr	0.0157609	0.161356	0.797	0.757	1	1.05284	0
Por	0.0160905	0.123877	0.286	0.233	1	1.22747	0
Sec24d	0.0167321	0.0483776	0.122	0.078	1	1.5641	0
AW551984	0.0167569	0.0576872	0.631	0.556	1	1.13489	0
Nt5c	0.0168491	0.107241	0.232	0.177	1	1.31073	0
Ift172	0.0170264	0.0693239	0.107	0.068	1	1.57353	0
Tiparp	0.0172783	0.103926	0.156	0.111	1	1.40541	0
Cald1	0.0174766	0.0769185	0.102	0.064	1	1.59375	0
Pnma3	0.0175379	0.125183	0.488	0.43	1	1.13488	0
Prkacb	0.0177173	0.0769	0.877	0.949	1	0.924131	0
Ppp4r4	0.0180814	0.04022	0.138	0.093	1	1.48387	0
E130309D02Rik	0.0182151	0.0752789	0.111	0.072	1	1.54167	0
Gabrb1	0.0182527	0.144692	0.795	0.8	1	0.99375	0
Dgkd	0.0182754	0.0782828	0.205	0.152	1	1.34868	0
Kif26b	0.0185064	0.0868049	0.117	0.076	1	1.53947	0
Gria3	0.0186336	0.189053	0.416	0.364	1	1.14286	0
Gpld1	0.0186642	0.101482	0.149	0.105	1	1.41905	0
Lrp1	0.0187085	0.162056	0.561	0.521	1	1.07678	0
Prpf4	0.0191722	0.100976	0.126	0.086	1	1.46512	0
Tm7sf3	0.0196486	0.0776778	0.124	0.082	1	1.5122	0
2310035C23Rik	0.019855	0.132399	0.458	0.383	1	1.19582	0
Sntg1	0.0199443	0.0966526	0.184	0.138	1	1.33333	0
2010005H15Rik	0.0203389	0.0580351	0.131	0.088	1	1.48864	0
Acsl1	0.0204726	0.146764	0.287	0.235	1	1.22128	0
Arhgap26	0.020619	0.103996	0.371	0.313	1	1.1853	0
Gatad2b	0.0208081	0.115555	0.611	0.57	1	1.07193	0
Pim3	0.0209553	0.0868579	0.182	0.132	1	1.37879	0
Ap3b1	0.0212465	0.101987	0.117	0.078	1	1.5	0
2900026A02Rik	0.0213932	0.0475216	0.115	0.076	1	1.51316	0
Chst2	0.0214944	0.160908	0.293	0.241	1	1.21577	0
B230334C09Rik	0.0217369	0.117274	0.461	0.403	1	1.14392	0
Klhl3	0.0218561	0.132974	0.217	0.165	1	1.31515	0
Eif1b	0.0218805	0.103049	0.759	0.813	1	0.933579	0
Gstm5	0.0219101	0.106245	0.258	0.206	1	1.25243	0
Stim2	0.0219296	0.0823719	0.259	0.204	1	1.26961	0
Hdac4	0.022148	0.099752	0.245	0.187	1	1.31016	0
Alcam	0.0223791	0.234294	0.563	0.56	1	1.00536	0
Trmt10a	0.0223837	0.110436	0.168	0.123	1	1.36585	0
Baiap3	0.0224365	0.117245	0.771	0.753	1	1.0239	0
Fam8a1	0.0227559	0.137402	0.626	0.595	1	1.0521	0
Cacnb3	0.0232128	0.108164	0.313	0.257	1	1.2179	0
Aagab	0.0241742	0.105974	0.179	0.134	1	1.33582	0
Tmem91	0.0245059	0.223706	0.696	0.685	1	1.01606	0
Selenos	0.0245183	0.100899	0.23	0.177	1	1.29944	0
Slbp	0.0248066	0.127058	0.312	0.253	1	1.2332	0
Robo2	0.0248185	0.0697289	0.168	0.121	1	1.38843	0
Spint2	0.0248634	0.0990134	0.336	0.27	1	1.24444	0
Repin1	0.0249529	0.124881	0.225	0.175	1	1.28571	0
Pde1c	0.0250037	0.0581449	0.191	0.142	1	1.34507	0
Fdps	0.0250656	0.157679	0.225	0.181	1	1.24309	0
Ak4	0.0250825	0.0513163	0.206	0.152	1	1.35526	0
Grid2	0.025262	0.21826	0.479	0.444	1	1.07883	0
Tmem106b	0.0253715	0.10922	0.608	0.549	1	1.10747	0
Kcnq5	0.0254081	0.0809809	0.116	0.078	1	1.48718	0
Ipcef1	0.0257043	0.0511202	0.124	0.082	1	1.5122	0
Zfp92	0.0257144	0.0608	0.228	0.173	1	1.31792	0
Tshz1	0.0260148	0.0581378	0.147	0.103	1	1.42718	0
D430019H16Rik	0.0260395	0.0940062	0.373	0.307	1	1.21498	0
Egfl7	0.0262562	0.106991	0.194	0.148	1	1.31081	0
Hectd1	0.0264884	0.0207244	0.416	0.475	1	0.875789	0
Tspan4	0.0266057	0.0599635	0.137	0.095	1	1.44211	0
Stum	0.0266646	0.080898	0.163	0.119	1	1.36975	0
Camk2a	0.0267232	0.109779	0.478	0.428	1	1.11682	0
Trmt6	0.0268672	0.056654	0.129	0.088	1	1.46591	0
Gramd1b	0.0269011	0.113165	0.312	0.253	1	1.2332	0
Fstl5	0.0270479	0.199863	0.521	0.502	1	1.03785	0
AC149090.1	0.027305	0.179482	0.763	0.724	1	1.05387	0
Rbm5	0.0274015	0.151418	0.692	0.654	1	1.0581	0
Metap1d	0.0274062	0.156985	0.206	0.16	1	1.2875	0
Crocc	0.0278169	0.0865134	0.233	0.177	1	1.31638	0
Zbtb41	0.0278219	0.0759243	0.158	0.115	1	1.37391	0
Pitpnm2	0.0279	0.0362992	0.105	0.068	1	1.54412	0
Lrch1	0.0279007	0.0962469	0.182	0.136	1	1.33824	0
Syne2	0.0279877	0.0617713	0.108	0.072	1	1.5	0
Timm10b	0.0282655	0.00987007	0.366	0.428	1	0.85514	0
Cers2	0.028557	0.107443	0.163	0.121	1	1.34711	0
Rap2b	0.0294581	0.103339	0.282	0.224	1	1.25893	0
Akap8	0.03004	0.129779	0.297	0.239	1	1.24268	0
Khdrbs3	0.0308824	0.0569311	0.272	0.22	1	1.23636	0
Nop56	0.0310192	0.196643	0.569	0.519	1	1.09634	0
Hmbs	0.0313702	0.0916895	0.145	0.103	1	1.40777	0
Iqsec1	0.0313793	0.00265993	0.397	0.461	1	0.861171	0
Grpel2	0.0313896	0.0555329	0.139	0.097	1	1.43299	0
Setx	0.031407	0.0759234	0.312	0.249	1	1.25301	0
Cdc42se2	0.0315399	0.108539	0.458	0.393	1	1.16539	0
Dhcr24	0.0317931	0.116617	0.351	0.298	1	1.17785	0
Dusp18	0.0319494	0.0751026	0.134	0.095	1	1.41053	0
Cbln2	0.0319613	0.126809	0.135	0.097	1	1.39175	0
B9d1	0.0319706	0.0594595	0.117	0.078	1	1.5	0
Ift88	0.0320429	0.0721136	0.121	0.084	1	1.44048	0
Nup155	0.0321843	0.0540623	0.109	0.074	1	1.47297	0
Ildr2	0.0325078	0.13984	0.397	0.344	1	1.15407	0
Os9	0.0325644	0.133329	0.35	0.3	1	1.16667	0
Arid1b	0.032652	0.0978197	0.297	0.243	1	1.22222	0
Tor1b	0.0327878	0.0986976	0.186	0.142	1	1.30986	0
Nvl	0.0328484	0.147222	0.333	0.282	1	1.18085	0
Rap2a	0.0329001	0.0882352	0.338	0.282	1	1.19858	0
Cdk4	0.0331259	0.0735316	0.232	0.179	1	1.29609	0
Emd	0.0336221	0.0577747	0.13	0.091	1	1.42857	0
Disp2	0.0337318	0.123403	0.888	0.897	1	0.989967	0
Tm2d1	0.0339862	0.11197	0.465	0.412	1	1.12864	0
Tmem237	0.0342105	0.0857628	0.268	0.214	1	1.25234	0
Marcksl1	0.0345361	0.0802279	0.721	0.716	1	1.00698	0
Dalrd3	0.0348125	0.159252	0.361	0.3	1	1.20333	0
Fubp1	0.0349832	0.116746	0.681	0.632	1	1.07753	0
Rps6ka6	0.035336	0.0368093	0.172	0.123	1	1.39837	0
Srsf2	0.0353499	0.217857	0.72	0.685	1	1.05109	0
Tomm20	0.0359411	0.0630404	0.878	0.912	1	0.962719	0
Rbfox1	0.0361483	0.0760838	0.224	0.173	1	1.2948	0
Sox5	0.0364365	0.062054	0.15	0.109	1	1.37615	0
Ube3c	0.0369409	0.0946077	0.412	0.352	1	1.17045	0
Plcxd3	0.0372164	0.111901	0.256	0.208	1	1.23077	0
Gnai1	0.0374924	0.117565	0.488	0.449	1	1.08686	0
Igf2bp3	0.0376306	0.269387	0.731	0.695	1	1.0518	0
Simc1	0.0376646	0.07726	0.181	0.136	1	1.33088	0
Doc2a	0.0379704	0.0571343	0.176	0.132	1	1.33333	0
Elp6	0.0382175	0.0674891	0.104	0.07	1	1.48571	0
Fbxo41	0.0387515	0.0867664	0.288	0.241	1	1.19502	0
Swt1	0.0388209	0.0173797	0.194	0.241	1	0.804979	0
Supt20	0.0388691	0.00576728	0.268	0.321	1	0.834891	0
Tbcc	0.0390379	0.054036	0.116	0.078	1	1.48718	0
Nrbp2	0.0398654	0.144287	0.348	0.292	1	1.19178	0
Ralgps2	0.0398679	0.106945	0.355	0.307	1	1.15635	0
Fam171a1	0.0399791	0.0755675	0.193	0.148	1	1.30405	0
Cwf19l2	0.0399904	0.0160695	0.215	0.263	1	0.81749	0
Cyc1	0.0401007	9.53216e-07	0.475	0.523	1	0.908222	0
Tcea2	0.0401446	0.124081	0.252	0.2	1	1.26	0
Bex2	0.0402351	0.082869	0.81	0.868	1	0.93318	0
Tmem248	0.0402637	0.111998	0.382	0.327	1	1.1682	0
Nasp	0.0407512	0.0647294	0.103	0.07	1	1.47143	0
Gtf2a2	0.0411229	0.0016493	0.345	0.409	1	0.843521	0
Rbm3	0.0412082	0.16312	0.471	0.412	1	1.1432	0
Xrcc3	0.0414501	0.0620984	0.119	0.082	1	1.45122	0
Elmo2	0.0415439	0.0803804	0.257	0.206	1	1.24757	0
Itm2b	0.0418387	0.128706	0.771	0.765	1	1.00784	0
mt-Nd3	0.0422119	0.116059	0.947	0.973	1	0.973279	0
Sgcb	0.042246	0.0937296	0.242	0.195	1	1.24103	0
Dpp10	0.0422502	0.0968423	0.428	0.372	1	1.15054	0
Camk1g	0.0423043	0.0573171	0.184	0.14	1	1.31429	0
Nos1	0.0425838	0.0959126	0.34	0.29	1	1.17241	0
Ptprt	0.0430023	0.143336	0.275	0.226	1	1.21681	0
Rgs10	0.0430163	0.17634	0.608	0.601	1	1.01165	0
Cpne2	0.0433988	0.0759485	0.372	0.305	1	1.21967	0
Flna	0.0434153	0.0912715	0.124	0.088	1	1.40909	0
Ssr1	0.0435034	0.123042	0.821	0.827	1	0.992745	0
Tmem150a	0.0435463	0.0910024	0.109	0.076	1	1.43421	0
Rab3c	0.0436979	0.115792	0.738	0.72	1	1.025	0
Tmed7	0.0437628	0.153308	0.526	0.49	1	1.07347	0
Rfx1	0.0437752	0.081332	0.132	0.095	1	1.38947	0
Arf1	0.0442068	0.0892175	0.819	0.848	1	0.965802	0
Dopey2	0.0445227	0.113647	0.269	0.22	1	1.22273	0
Pex13	0.0448074	0.0105886	0.174	0.218	1	0.798165	0
Alkbh1	0.0451082	0.14097	0.379	0.323	1	1.17337	0
Ccng1	0.0451771	0.0539665	0.185	0.14	1	1.32143	0
Dgcr2	0.0452262	0.139991	0.587	0.582	1	1.00859	0
Pcnx	0.0453924	0.0939704	0.246	0.2	1	1.23	0
Samd10	0.0456049	0.0758869	0.187	0.144	1	1.29861	0
Pcyox1l	0.0459959	0.0881477	0.123	0.088	1	1.39773	0
Fem1c	0.0460927	0.0860968	0.314	0.259	1	1.21236	0
Psma1	0.0461852	0.149452	0.711	0.687	1	1.03493	0
Nlgn1	0.0467784	0.133388	0.466	0.399	1	1.16792	0
Apoa1	0.046974	0.10348	0.132	0.097	1	1.36082	0
Atl2	0.0471643	0.0958746	0.285	0.237	1	1.20253	0
Dynlt1c	0.0472571	0.127138	0.105	0.074	1	1.41892	0
4430402I18Rik	0.0472727	0.205608	0.338	0.298	1	1.13423	0
Mlec	0.0473423	0.120816	0.485	0.442	1	1.09729	0
Luc7l2	0.0474605	0.141976	0.854	0.856	1	0.997664	0
Chodl	0.0474819	0.101532	0.133	0.099	1	1.34343	0
Exog	0.0476949	0.0449175	0.138	0.101	1	1.36634	0
Nrsn2	0.0477223	0.0785663	0.881	0.895	1	0.984358	0
Ccpg1	0.04776	0.00560183	0.213	0.259	1	0.822394	0
Gga3	0.0479726	0.0796012	0.251	0.2	1	1.255	0
Plxna2	0.0480352	0.0921032	0.358	0.305	1	1.17377	0
D1Ertd622e	0.048733	0.089565	0.214	0.171	1	1.25146	0
Timmdc1	0.0487574	0.0612757	0.109	0.076	1	1.43421	0
Serinc1	0.0491191	0.0692951	0.945	0.971	1	0.973223	0
Mettl3	0.0493418	0.0111324	0.135	0.173	1	0.780347	0
Resp18	0.049542	0.172677	0.677	0.642	1	1.05452	0
Pnck	0.0495599	0.104099	0.561	0.521	1	1.07678	0
Pcyox1	0.0497883	0.131423	0.519	0.49	1	1.05918	0
Tubgcp5	0.0499684	0.125528	0.235	0.191	1	1.23037	0
Slc7a4	0.0500771	0.10247	0.175	0.136	1	1.28676	0
Rnpc3	0.0501212	0.0434912	0.243	0.292	1	0.832192	0
Snn	0.0501772	0.119104	0.435	0.393	1	1.10687	0
Mat2a	0.0503315	0.120201	0.748	0.735	1	1.01769	0
Plk2	0.0512391	0.0854713	0.114	0.082	1	1.39024	0
Fbxl12	0.0518888	0.0119332	0.139	0.177	1	0.785311	0
Cpd	0.052062	0.0803102	0.207	0.165	1	1.25455	0
Slc9a5	0.0527993	0.0834509	0.129	0.095	1	1.35789	0
Tmem29	0.0531756	0.0940979	0.375	0.313	1	1.19808	0
Prkar2b	0.0533398	0.103589	0.337	0.294	1	1.14626	0
Ergic1	0.0533844	0.144294	0.503	0.463	1	1.08639	0
Tmem30a	0.053391	0.121846	0.828	0.823	1	1.00608	0
A830018L16Rik	0.0535843	0.0933845	0.245	0.198	1	1.23737	0
Dguok	0.0541284	0.0761455	0.239	0.191	1	1.25131	0
Rprm	0.0543516	0.0976033	0.222	0.179	1	1.24022	0
Plppr5	0.0546612	0.00328403	0.209	0.257	1	0.81323	0
Necab1	0.0549026	0.0616769	0.113	0.08	1	1.4125	0
Eri3	0.0549047	0.0957401	0.389	0.329	1	1.18237	0
Tunar	0.0553591	0.0448435	0.16	0.119	1	1.34454	0
Lrrc7	0.0555502	0.140484	0.405	0.362	1	1.11878	0
Exd2	0.0557683	0.123205	0.168	0.132	1	1.27273	0
Ankrd10	0.0562886	0.141243	0.312	0.27	1	1.15556	0
Cnpy3	0.0566771	0.0909312	0.334	0.282	1	1.1844	0
Spns2	0.0567273	0.0601391	0.185	0.142	1	1.30282	0
Hsph1	0.0570705	0.100215	0.61	0.601	1	1.01498	0
Hacd1	0.0571259	0.0718791	0.12	0.086	1	1.39535	0
Cdk2ap1	0.0573072	0.0620755	0.175	0.136	1	1.28676	0
Ctdspl2	0.0574762	0.0825204	0.244	0.195	1	1.25128	0
Caly	0.0576345	0.137643	0.706	0.675	1	1.04593	0
Grina	0.0577904	0.114799	0.754	0.753	1	1.00133	0
Zfp248	0.0577983	0.0757744	0.123	0.088	1	1.39773	0
Fcho1	0.0579607	0.0916445	0.199	0.156	1	1.27564	0
Txndc5	0.0582077	0.102805	0.316	0.267	1	1.18352	0
Disp3	0.0584012	0.0704828	0.114	0.082	1	1.39024	0
Fnbp1	0.0584413	0.0586826	0.212	0.165	1	1.28485	0
Slc25a30	0.0585874	0.050333	0.132	0.097	1	1.36082	0
Aff4	0.0585902	0.0905982	0.714	0.72	1	0.991667	0
Fbxo2	0.0587914	0.0664447	0.23	0.183	1	1.25683	0
Tmx1	0.0588682	0.132146	0.58	0.568	1	1.02113	0
Susd4	0.0589453	0.155465	0.537	0.508	1	1.05709	0
Me1	0.0590218	0.0644652	0.185	0.144	1	1.28472	0
Arxes2	0.0596005	0.149754	0.575	0.56	1	1.02679	0
Slf2	0.0605611	0.120333	0.352	0.302	1	1.16556	0
Yeats2	0.0606385	0.118289	0.294	0.249	1	1.18072	0
B430010I23Rik	0.0608504	0.00526948	0.087	0.119	1	0.731092	0
Arf3	0.0612248	0.0870545	0.852	0.907	1	0.939361	0
Nptx1	0.0612895	0.121684	0.249	0.21	1	1.18571	0
Ank2	0.0618337	0.0957602	0.898	0.914	1	0.982495	0
Tmtc1	0.0620422	0.0728805	0.183	0.144	1	1.27083	0
Nup88	0.0620682	0.0751487	0.201	0.158	1	1.27215	0
Ppm1f	0.0621301	0.0431833	0.289	0.237	1	1.21941	0
Letm2	0.0621913	0.0189712	0.421	0.459	1	0.917211	0
Exosc10	0.0622039	0.0864447	0.201	0.16	1	1.25625	0
Agtrap	0.0625958	0.0514223	0.116	0.082	1	1.41463	0
Slc25a32	0.0630261	0.0544733	0.153	0.115	1	1.33043	0
Chmp2b	0.0630358	0.0478402	0.225	0.181	1	1.24309	0
Srsf11	0.0633958	0.162916	0.736	0.737	1	0.998643	0
Phtf1	0.0634576	0.107179	0.198	0.163	1	1.21472	0
Smg1	0.0636085	0.121993	0.353	0.311	1	1.13505	0
Atrnl1	0.0636812	0.0544399	0.105	0.074	1	1.41892	0
Rfesd	0.0638552	0.0824363	0.139	0.105	1	1.32381	0
Bmi1	0.0641319	0.0586087	0.187	0.144	1	1.29861	0
Trank1	0.0643859	0.116162	0.408	0.358	1	1.13966	0
Tex264	0.0644303	0.118577	0.206	0.167	1	1.23353	0
Uimc1	0.0647023	0.0911762	0.158	0.121	1	1.30579	0
Ddr1	0.0654622	0.0541687	0.112	0.08	1	1.4	0
Cspg5	0.0657951	0.104442	0.7	0.665	1	1.05263	0
Nsmce3	0.0658728	0.098614	0.226	0.187	1	1.20856	0
Sil1	0.0661604	0.0338768	0.101	0.07	1	1.44286	0
Mybbp1a	0.0664064	0.0524032	0.106	0.074	1	1.43243	0
Csmd2	0.0664897	0.0678571	0.236	0.191	1	1.2356	0
Ece2	0.0665054	0.122316	0.348	0.296	1	1.17568	0
B3galt1	0.0668982	0.0912923	0.259	0.216	1	1.19907	0
Paxbp1	0.0675366	0.00946414	0.241	0.284	1	0.848592	0
Gfm1	0.0681406	0.0553106	0.101	0.072	1	1.40278	0
Celf5	0.0681594	0.113984	0.671	0.648	1	1.03549	0
Cd63	0.0685132	0.0114725	0.193	0.239	1	0.807531	0
Slc7a3	0.068652	0.0613492	0.141	0.107	1	1.31776	0
Anks3	0.0687311	0.0974573	0.26	0.214	1	1.21495	0
Asl	0.0689821	0.0122111	0.105	0.138	1	0.76087	0
Fam124a	0.0695368	0.0584683	0.125	0.093	1	1.34409	0
Ampd2	0.069781	0.104131	0.362	0.313	1	1.15655	0
Kcnt1	0.0701925	0.0869613	0.286	0.235	1	1.21702	0
Nlgn2	0.0704952	0.0943623	0.68	0.658	1	1.03343	0
Arhgdig	0.0708602	0.103349	0.565	0.537	1	1.05214	0
Micu2	0.070908	0.0573983	0.113	0.082	1	1.37805	0
Isy1	0.0709412	0.0567067	0.177	0.138	1	1.28261	0
Tmed2	0.0712125	0.112191	0.599	0.551	1	1.08711	0
Ipo4	0.0712817	0.106953	0.281	0.237	1	1.18565	0
BC031181	0.071529	0.15441	0.584	0.537	1	1.08752	0
Scd1	0.0715676	0.0708041	0.118	0.086	1	1.37209	0
Rac3	0.0721581	0.0788336	0.42	0.356	1	1.17978	0
Ctnna2	0.0722167	0.0928993	0.434	0.401	1	1.08229	0
Tcaim	0.0722179	0.077894	0.171	0.132	1	1.29545	0
Sf3b6	0.0723883	0.0780917	0.267	0.222	1	1.2027	0
1110008P14Rik	0.0724367	0.108022	0.526	0.49	1	1.07347	0
Kcnq3	0.0726777	0.141176	0.355	0.323	1	1.09907	0
Acap3	0.0732822	0.0618397	0.174	0.136	1	1.27941	0
Capn7	0.0739584	0.051378	0.22	0.173	1	1.27168	0
Rnf215	0.0740041	0.0937723	0.148	0.115	1	1.28696	0
Gpm6a	0.0744247	0.100528	0.955	0.971	1	0.983522	0
BC030499	0.0751045	0.104623	0.141	0.109	1	1.29358	0
Psma3	0.0753266	0.0116305	0.745	0.796	1	0.93593	0
Sf3b1	0.0753958	0.134215	0.611	0.584	1	1.04623	0
Adcy3	0.0759575	0.0909609	0.302	0.257	1	1.1751	0
Dnajc14	0.0780584	0.061985	0.182	0.144	1	1.26389	0
Lman2l	0.0783704	0.130391	0.331	0.288	1	1.14931	0
Ndrg1	0.0786425	0.0317804	0.171	0.132	1	1.29545	0
Trpc1	0.0787328	0.0190782	0.308	0.35	1	0.88	0
Ccnl2	0.0787776	0.161641	0.484	0.438	1	1.10502	0
Fam214a	0.0789566	0.0970702	0.231	0.189	1	1.22222	0
Sf3b3	0.0790489	0.137337	0.463	0.412	1	1.12379	0
Gosr2	0.0791551	0.0755661	0.294	0.245	1	1.2	0
Rnf208	0.0795671	0.0865686	0.569	0.543	1	1.04788	0
Lingo3	0.0799347	0.0626812	0.125	0.095	1	1.31579	0
Akap1	0.0801701	0.0843755	0.132	0.101	1	1.30693	0
Tsr3	0.0804483	0.000852566	0.144	0.179	1	0.804469	0
Cntn1	0.080543	0.0228375	0.84	0.833	1	1.0084	0
B4galt3	0.0809001	0.100911	0.204	0.163	1	1.25153	0
Poglut1	0.0809769	0.0987848	0.365	0.323	1	1.13003	0
Tmem175	0.0811746	0.0652481	0.17	0.132	1	1.28788	0
Phactr1	0.0812794	0.109942	0.478	0.447	1	1.06935	0
Ptp4a1	0.0814258	0.127724	0.562	0.566	1	0.992933	0
Cadm3	0.0814459	0.116724	0.653	0.63	1	1.03651	0
Camk4	0.0818002	0.138226	0.366	0.333	1	1.0991	0
Larp1b	0.0818673	0.0607881	0.107	0.078	1	1.37179	0
Slitrk1	0.0824383	0.0781691	0.428	0.381	1	1.12336	0
Tmem199	0.0824497	0.0115756	0.275	0.323	1	0.851393	0
Rab2b	0.0826916	0.0775214	0.239	0.2	1	1.195	0
Rsrp1	0.0828124	0.183845	0.948	0.936	1	1.01282	0
Cst3	0.0834621	0.162566	0.593	0.553	1	1.07233	0
Zfp810	0.083624	0.056032	0.115	0.084	1	1.36905	0
Slc9a3r2	0.0841254	0.0525946	0.172	0.134	1	1.28358	0
Plxnb2	0.0842273	0.0744664	0.214	0.173	1	1.23699	0
Ankrd50	0.0843324	0.0663107	0.29	0.245	1	1.18367	0
Ncoa6	0.0843712	0.0544248	0.162	0.126	1	1.28571	0
Lpcat1	0.0848559	0.0835581	0.276	0.235	1	1.17447	0
Rbck1	0.0851885	0.0748097	0.294	0.243	1	1.20988	0
Tada2a	0.0855054	0.0654681	0.134	0.103	1	1.30097	0
Rrnad1	0.0859327	0.171025	0.377	0.335	1	1.12537	0
Bicd1	0.0859815	0.00689681	0.573	0.63	1	0.909524	0
Ttc4	0.0860015	0.13685	0.303	0.261	1	1.16092	0
D430041D05Rik	0.0862921	0.0858021	0.349	0.307	1	1.13681	0
Pid1	0.0865141	0.0527461	0.386	0.447	1	0.863535	0
Actr1b	0.087138	0.117719	0.538	0.51	1	1.0549	0
Scmh1	0.0878656	0.00893309	0.372	0.422	1	0.881517	0
Crtac1	0.0881753	0.0867228	0.121	0.093	1	1.30108	0
Tnr	0.0888173	0.101027	0.304	0.255	1	1.19216	0
Nras	0.0889434	0.145468	0.199	0.165	1	1.20606	0
Tmem28	0.0893508	0.0497265	0.146	0.113	1	1.29204	0
Hnrnpl	0.0894874	0.0211463	0.47	0.523	1	0.898662	0
Nrxn2	0.0896062	0.0719461	0.914	0.924	1	0.989177	0
Cacnb2	0.089632	0.100359	0.184	0.15	1	1.22667	0
Mzf1	0.0897359	0.0519529	0.116	0.086	1	1.34884	0
Pik3r4	0.0904945	0.0517516	0.134	0.101	1	1.32673	0
AF529169	0.0906181	0.0329116	0.115	0.084	1	1.36905	0
Mrps26	0.0910454	0.0124686	0.565	0.611	1	0.924714	0
Wscd2	0.091135	0.134478	0.298	0.257	1	1.15953	0
Zfp597	0.0911384	0.032339	0.179	0.14	1	1.27857	0
Sfpq	0.0918473	0.0824304	0.542	0.486	1	1.11523	0
Cacna1c	0.0918798	0.0681278	0.191	0.154	1	1.24026	0
Nr3c1	0.0921759	0.0827926	0.429	0.385	1	1.11429	0
Palld	0.0921776	0.0168708	0.12	0.086	1	1.39535	0
Klc2	0.092537	0.108734	0.482	0.43	1	1.12093	0
Maip1	0.0926904	0.0651044	0.136	0.105	1	1.29524	0
Efnb1	0.0930488	0.0485908	0.107	0.078	1	1.37179	0
Gm9801	0.0934092	0.0830214	0.108	0.08	1	1.35	0
Comtd1	0.0937326	0.136109	0.158	0.128	1	1.23438	0
Prrc2c	0.0941865	0.106836	0.63	0.597	1	1.05528	0
5330434G04Rik	0.0947525	0.178688	0.753	0.767	1	0.981747	0
Fsd1	0.0958494	0.107397	0.211	0.175	1	1.20571	0
Pias4	0.0959847	0.0681832	0.263	0.22	1	1.19545	0
Slc35f5	0.0967413	0.0315858	0.129	0.097	1	1.3299	0
Tcta	0.0968477	0.0736019	0.19	0.152	1	1.25	0
Tspoap1	0.0969662	0.120763	0.329	0.296	1	1.11149	0
Car11	0.0969799	0.00155674	0.204	0.241	1	0.846473	0
Vwa5b1	0.0973152	0.0580597	0.154	0.119	1	1.29412	0
Gphn	0.0974044	0.0671567	0.279	0.237	1	1.17722	0
Nr2c2ap	0.0976199	0.0546753	0.239	0.2	1	1.195	0
Man2c1	0.0983425	0.0101376	0.134	0.167	1	0.802395	0
Fam53a	0.0983439	0.0575272	0.125	0.097	1	1.28866	0
Ints7	0.0984241	0.0640635	0.101	0.074	1	1.36486	0
Ndufa13	0.0990266	0.0772343	0.877	0.883	1	0.993205	0
Hsp90b1	0.0992205	0.130411	0.732	0.741	1	0.987854	0
Sigmar1	0.0994811	0.0631486	0.194	0.152	1	1.27632	0
2810403A07Rik	0.099798	0.0998469	0.278	0.233	1	1.19313	0
Pcnx3	0.0998056	0.0585848	0.156	0.121	1	1.28926	0
Radil	0.0998507	0.073796	0.104	0.076	1	1.36842	0
Txndc16	0.0999694	0.0298314	0.256	0.296	1	0.864865	0
Klf6	0.101093	0.0087394	0.208	0.249	1	0.835341	0
Sec61a2	0.101163	0.196299	0.616	0.595	1	1.03529	0
Syt7	0.102176	0.0914816	0.428	0.37	1	1.15676	0
Amz1	0.10249	0.0519809	0.109	0.08	1	1.3625	0
Slc16a7	0.10254	0.000905264	0.099	0.128	1	0.773438	0
Maml3	0.102756	0.0403139	0.119	0.088	1	1.35227	0
Pkn1	0.103512	0.0653764	0.202	0.163	1	1.23926	0
Chmp1a	0.103567	0.0674663	0.271	0.228	1	1.1886	0
Trpc5	0.103668	0.0962897	0.265	0.228	1	1.16228	0
Kctd10	0.103763	0.0484705	0.204	0.167	1	1.22156	0
Acer3	0.103861	0.0491178	0.173	0.138	1	1.25362	0
Tox2	0.103893	0.0832402	0.316	0.278	1	1.13669	0
Canx	0.104043	0.111339	0.913	0.932	1	0.979614	0
Cklf	0.104387	0.102415	0.165	0.132	1	1.25	0
Nup98	0.104474	0.0161808	0.211	0.253	1	0.833992	0
Ccdc50	0.104701	0.0955918	0.433	0.391	1	1.10742	0
Dync2h1	0.10472	0.0928147	0.372	0.323	1	1.1517	0
Rab34	0.104876	0.0103233	0.302	0.34	1	0.888235	0
Homer1	0.105049	0.0536244	0.224	0.183	1	1.22404	0
Cmip	0.105565	0.0942985	0.4	0.356	1	1.1236	0
Atp6v0e2	0.105689	0.0962035	0.795	0.84	1	0.946429	0
Surf4	0.105761	0.106579	0.319	0.288	1	1.10764	0
Atp9a	0.105883	0.117927	0.712	0.73	1	0.975342	0
Tmem143	0.106317	0.00174243	0.093	0.121	1	0.768595	0
Tprkb	0.106392	0.00958921	0.307	0.342	1	0.897661	0
Agap1	0.106543	0.0953729	0.53	0.477	1	1.11111	0
Lrrc8c	0.106669	0.0719237	0.181	0.148	1	1.22297	0
Blcap	0.107101	0.124539	0.609	0.593	1	1.02698	0
Kdelr2	0.1072	0.205019	0.347	0.327	1	1.06116	0
Astn1	0.107645	0.0939279	0.75	0.741	1	1.01215	0
Cyth2	0.108282	0.0529395	0.179	0.144	1	1.24306	0
Zcchc7	0.109211	0.10299	0.455	0.414	1	1.09903	0
Gm48960	0.109445	0.0828212	0.112	0.084	1	1.33333	0
Ydjc	0.109974	0.0612534	0.18	0.144	1	1.25	0
Slc4a10	0.110157	0.115001	0.489	0.444	1	1.10135	0
Tnrc6a	0.110209	0.0876538	0.755	0.737	1	1.02442	0
Tmed10	0.110555	0.113393	0.698	0.691	1	1.01013	0
Aldoc	0.11079	0.0802819	0.283	0.251	1	1.12749	0
Shc2	0.111078	0.0583027	0.162	0.128	1	1.26562	0
Gt(ROSA)26Sor	0.111114	0.00194305	0.215	0.251	1	0.856574	0
Fam241b	0.11143	0.0155267	0.264	0.305	1	0.865574	0
Polr2d	0.111797	0.0537369	0.13	0.101	1	1.28713	0
Tmsb10	0.111797	0.0426081	0.927	0.977	1	0.948823	0
Kcnma1	0.111801	0.102239	0.55	0.514	1	1.07004	0
Lsm7	0.112264	0.112887	0.552	0.516	1	1.06977	0
Gm16286	0.113209	0.0902535	0.495	0.459	1	1.07843	0
Pttg1ip	0.113214	0.0717821	0.113	0.086	1	1.31395	0
Gpr26	0.113785	0.0386976	0.122	0.093	1	1.31183	0
Rundc3b	0.114009	0.044663	0.332	0.284	1	1.16901	0
Nckipsd	0.114156	0.0709514	0.225	0.187	1	1.20321	0
Gda	0.114444	0.152565	0.412	0.385	1	1.07013	0
Atp11b	0.115009	0.103264	0.299	0.259	1	1.15444	0
Ablim1	0.115069	0.0752729	0.221	0.185	1	1.19459	0
Smg9	0.115226	0.0691945	0.131	0.103	1	1.27184	0
Atp1a2	0.115559	0.0858466	0.115	0.088	1	1.30682	0
Prmt5	0.115751	0.0666581	0.261	0.222	1	1.17568	0
Acat1	0.115914	0.0550439	0.316	0.27	1	1.17037	0
Rhot1	0.115947	0.0978543	0.272	0.233	1	1.16738	0
Rab39b	0.11614	0.000918904	0.261	0.3	1	0.87	0
Pacs1	0.11662	0.0487218	0.277	0.237	1	1.16878	0
Faah	0.116769	0.0740436	0.248	0.208	1	1.19231	0
Heatr3	0.116871	0.082087	0.138	0.111	1	1.24324	0
Zfp236	0.116899	0.0402108	0.103	0.076	1	1.35526	0
mt-Nd6	0.11713	0.065366	0.154	0.123	1	1.25203	0
Clcn7	0.117141	0.107429	0.242	0.208	1	1.16346	0
Rbm25	0.117268	0.00532528	0.731	0.772	1	0.946891	0
Arel1	0.117734	0.0719058	0.202	0.171	1	1.18129	0
Armc9	0.118024	0.128656	0.285	0.245	1	1.16327	0
Dph5	0.118356	0.112999	0.143	0.115	1	1.24348	0
Abcc5	0.119433	0.130359	0.394	0.352	1	1.11932	0
Arfgap2	0.119488	0.0104556	0.275	0.309	1	0.889968	0
Lims1	0.119634	0.0661734	0.218	0.179	1	1.21788	0
Csnk1d	0.119674	0.088823	0.472	0.426	1	1.10798	0
Ddx17	0.119749	0.0982979	0.703	0.691	1	1.01737	0
Kctd3	0.119969	0.0501434	0.279	0.235	1	1.18723	0
Pbdc1	0.120075	0.0518527	0.16	0.128	1	1.25	0
Coro1a	0.120157	0.0541941	0.109	0.082	1	1.32927	0
Thap2	0.120167	0.0533668	0.425	0.479	1	0.887265	0
Adam22	0.120634	0.141062	0.598	0.588	1	1.01701	0
Telo2	0.121034	0.113463	0.283	0.241	1	1.17427	0
Pitpnm3	0.121466	0.0350459	0.199	0.163	1	1.22086	0
Fut11	0.121496	0.0702734	0.117	0.088	1	1.32955	0
Gak	0.121544	0.053096	0.225	0.187	1	1.20321	0
Pfkl	0.121712	0.0791705	0.238	0.2	1	1.19	0
Shisa5	0.121803	0.0605998	0.245	0.206	1	1.18932	0
Emc3	0.122293	0.109209	0.328	0.288	1	1.13889	0
Mttp	0.123296	0.0389793	0.417	0.467	1	0.892934	0
Nuak1	0.123304	0.0579277	0.211	0.173	1	1.21965	0
Psmc4	0.123311	0.099992	0.274	0.235	1	1.16596	0
Cpeb4	0.123362	0.0470053	0.351	0.302	1	1.16225	0
Cyp46a1	0.123506	0.112079	0.333	0.294	1	1.13265	0
Dbi	0.123892	2.70335e-05	0.205	0.237	1	0.864979	0
Coq9	0.124825	0.0835573	0.192	0.16	1	1.2	0
Tmem191c	0.125693	0.051161	0.664	0.737	1	0.90095	0
Ktn1	0.125842	0.00663668	0.517	0.566	1	0.913428	0
Dlgap1	0.126205	0.0847152	0.482	0.553	1	0.871609	0
Grin2b	0.126269	0.0062017	0.785	0.84	1	0.934524	0
Abhd2	0.126587	0.0416698	0.11	0.084	1	1.30952	0
Etnk1	0.127704	0.0540849	0.82	0.85	1	0.964706	0
Nbeal1	0.127796	0.038589	0.362	0.405	1	0.893827	0
Gcfc2	0.127854	0.00148178	0.089	0.113	1	0.787611	0
Mospd3	0.128404	0.0733838	0.203	0.165	1	1.2303	0
2021-03-07	0.128519	0.0104967	0.434	0.479	1	0.906054	0
Lman2	0.128724	0.077699	0.334	0.296	1	1.12838	0
Sdf4	0.128915	0.133914	0.631	0.63	1	1.00159	0
Sez6l2	0.12897	0.0679032	0.676	0.671	1	1.00745	0
Tmod2	0.129048	0.0671217	0.715	0.706	1	1.01275	0
Sptbn4	0.129161	0.0722447	0.254	0.214	1	1.18692	0
Htt	0.129219	0.0138419	0.489	0.533	1	0.917448	0
Phb	0.129286	0.0480705	0.31	0.27	1	1.14815	0
Eif4a1	0.129846	0.10506	0.66	0.65	1	1.01538	0
Rasal2	0.130021	0.0918378	0.254	0.216	1	1.17593	0
Med10	0.130587	0.0726353	0.236	0.2	1	1.18	0
Tardbp	0.130805	0.10388	0.512	0.49	1	1.0449	0
Plekha5	0.130904	0.00639067	0.204	0.237	1	0.860759	0
Abcb7	0.131138	0.00920484	0.172	0.206	1	0.834951	0
Fads1	0.131294	0.0624247	0.275	0.233	1	1.18026	0
Stim1	0.131353	0.112069	0.51	0.484	1	1.05372	0
Aebp2	0.131439	0.0594977	0.3	0.261	1	1.14943	0
Fam20c	0.131467	0.0867712	0.277	0.241	1	1.14938	0
Tceal9	0.131672	0.101396	0.716	0.745	1	0.961074	0
Mapk8ip1	0.131778	0.123338	0.627	0.597	1	1.05025	0
Trafd1	0.131827	0.0957749	0.16	0.132	1	1.21212	0
Arhgap1	0.131929	0.0630608	0.253	0.214	1	1.18224	0
Nisch	0.132094	0.053134	0.857	0.891	1	0.961841	0
Tmub2	0.132216	0.0718372	0.205	0.171	1	1.19883	0
Hebp1	0.133091	0.0344028	0.101	0.076	1	1.32895	0
Arglu1	0.133093	0.107406	0.773	0.774	1	0.998708	0
Gm4631	0.133126	0.03177	0.115	0.088	1	1.30682	0
Mccc2	0.133148	0.0675783	0.102	0.078	1	1.30769	0
Sec11a	0.133242	0.0857504	0.189	0.158	1	1.1962	0
Slc2a8	0.133287	0.0893098	0.105	0.08	1	1.3125	0
Tmem178b	0.133484	0.0976015	0.474	0.436	1	1.08716	0
Ier3ip1	0.133712	0.0117186	0.601	0.66	1	0.910606	0
Mrap2	0.134148	0.18453	0.285	0.259	1	1.10039	0
Derl1	0.134257	0.0944645	0.455	0.407	1	1.11794	0
Dlg1	0.134497	0.0878517	0.313	0.28	1	1.11786	0
Rmdn3	0.134594	0.0845315	0.218	0.181	1	1.20442	0
Atf6b	0.134618	0.0480671	0.123	0.095	1	1.29474	0
Atg16l1	0.13464	0.0688567	0.256	0.216	1	1.18519	0
Cmpk2	0.134643	0.0130701	0.215	0.171	1	1.25731	0
Ssh3	0.134745	0.0782498	0.117	0.091	1	1.28571	0
Sema6b	0.135541	0.1072	0.358	0.319	1	1.12226	0
Vwc2l	0.136073	0.0405791	0.103	0.078	1	1.32051	0
Sun1	0.136228	0.107359	0.268	0.233	1	1.15021	0
Atxn2	0.136376	0.108358	0.495	0.467	1	1.05996	0
Galc	0.136473	0.0497523	0.102	0.078	1	1.30769	0
Lipe	0.137612	0.0211088	0.125	0.152	1	0.822368	0
Whamm	0.137717	0.0970728	0.179	0.146	1	1.22603	0
Ercc6l2	0.138078	0.00942339	0.092	0.117	1	0.786325	0
Trmt13	0.138144	0.0117806	0.187	0.222	1	0.842342	0
Mccc1	0.138271	0.0832254	0.175	0.144	1	1.21528	0
Pcdh1	0.138959	0.0673121	0.158	0.13	1	1.21538	0
Tmem62	0.139783	0.0730971	0.15	0.121	1	1.23967	0
Tmem243	0.140173	0.230292	0.323	0.294	1	1.09864	0
Tsfm	0.140245	0.0851538	0.169	0.138	1	1.22464	0
Supt7l	0.140279	0.0734151	0.14	0.113	1	1.23894	0
Tbc1d23	0.140391	0.0789453	0.263	0.22	1	1.19545	0
Rps6kl1	0.140684	0.0655766	0.176	0.144	1	1.22222	0
Prkcsh	0.141902	0.106315	0.297	0.263	1	1.12928	0
Akap8l	0.143091	0.160291	0.451	0.422	1	1.06872	0
Gpatch2	0.143239	0.0747564	0.208	0.177	1	1.17514	0
Pigx	0.143591	0.0455461	0.161	0.13	1	1.23846	0
Kdsr	0.143613	0.0146292	0.377	0.409	1	0.92176	0
Tmem87b	0.143874	0.0634525	0.298	0.253	1	1.17787	0
Igfbp5	0.144707	0.0852712	0.218	0.185	1	1.17838	0
Tada2b	0.144912	0.00172977	0.143	0.111	1	1.28829	0
Bean1	0.145202	0.0579879	0.15	0.121	1	1.23967	0
Kcna6	0.145501	0.00305261	0.399	0.442	1	0.902715	0
Ppip5k1	0.145609	0.0278327	0.365	0.395	1	0.924051	0
Jph3	0.145651	0.0853671	0.418	0.385	1	1.08571	0
Nrcam	0.145842	0.00758315	0.37	0.405	1	0.91358	0
Atg9a	0.146893	0.111867	0.342	0.309	1	1.1068	0
Dusp15	0.146995	0.0412685	0.115	0.088	1	1.30682	0
Snrpg	0.147652	0.0592156	0.442	0.414	1	1.06763	0
Creg2	0.148186	0.0855583	0.342	0.311	1	1.09968	0
Sdad1	0.149391	0.0219858	0.183	0.148	1	1.23649	0
Sbf2	0.149823	0.00674982	0.318	0.348	1	0.913793	0
9530077C05Rik	0.150522	0.0695234	0.104	0.08	1	1.3	0
Arf5	0.150694	0.124244	0.593	0.564	1	1.05142	0
Gfod2	0.150781	0.0534903	0.175	0.142	1	1.23239	0
Slc9a6	0.151389	0.126354	0.562	0.543	1	1.03499	0
Gabrg3	0.151846	0.0787691	0.422	0.368	1	1.14674	0
Nup214	0.153865	0.044166	0.133	0.105	1	1.26667	0
Ptprk	0.154523	0.107537	0.202	0.171	1	1.18129	0
Efnb3	0.15463	0.120704	0.665	0.663	1	1.00302	0
Srcap	0.155056	0.0988928	0.11	0.086	1	1.27907	0
Dip2a	0.15566	0.0529764	0.18	0.148	1	1.21622	0
Pwwp2a	0.156053	0.0654587	0.237	0.202	1	1.17327	0
Plp1	0.156277	0.0589933	0.251	0.214	1	1.1729	0
B830012L14Rik	0.1563	0.115435	0.325	0.292	1	1.11301	0
Fam172a	0.156823	0.0678975	0.182	0.152	1	1.19737	0
Carmil2	0.156941	0.0650481	0.274	0.23	1	1.1913	0
Tlnrd1	0.157233	0.0261171	0.189	0.154	1	1.22727	0
Gns	0.157425	0.104892	0.431	0.389	1	1.10797	0
Coro7	0.158252	0.000191894	0.124	0.148	1	0.837838	0
Klf13	0.158678	0.0838582	0.413	0.372	1	1.11022	0
Tmem108	0.158903	0.0771778	0.461	0.514	1	0.896887	0
Plagl1	0.159041	0.0108967	0.106	0.08	1	1.325	0
Coq8b	0.159257	0.0800324	0.139	0.113	1	1.23009	0
Slc43a2	0.159547	0.0287084	0.161	0.132	1	1.2197	0
Stk32c	0.159934	0.0700136	0.298	0.257	1	1.15953	0
Ddost	0.160049	0.120857	0.329	0.298	1	1.10403	0
Wdr33	0.160255	0.0319754	0.162	0.132	1	1.22727	0
Rab8b	0.160337	0.0616485	0.279	0.239	1	1.16736	0
Tmem234	0.16035	0.0176684	0.521	0.562	1	0.927046	0
Nelfcd	0.160962	0.0548496	0.138	0.111	1	1.24324	0
Atp2b2	0.161012	0.017815	0.61	0.566	1	1.07774	0
H2afj	0.16118	0.104177	0.275	0.241	1	1.14108	0
Wwc1	0.161199	0.0245111	0.122	0.095	1	1.28421	0
Fam49a	0.161378	0.0891134	0.252	0.222	1	1.13514	0
Sharpin	0.16202	0.0693317	0.147	0.121	1	1.21488	0
Gm26699	0.162465	0.3384	0.478	0.471	1	1.01486	0
Ank1	0.162483	0.0496679	0.182	0.15	1	1.21333	0
Gspt1	0.16259	0.13636	0.289	0.257	1	1.12451	0
Ski	0.162646	0.0771581	0.23	0.202	1	1.13861	0
Vgf	0.162874	0.158899	0.236	0.286	1	0.825175	0
Pcyt2	0.162905	0.0357762	0.356	0.391	1	0.910486	0
Gspt2	0.163857	0.0694942	0.187	0.156	1	1.19872	0
Skiv2l	0.164104	0.0553977	0.125	0.099	1	1.26263	0
2410002F23Rik	0.164299	0.099675	0.339	0.311	1	1.09003	0
BC005561	0.16449	0.17308	0.517	0.473	1	1.09302	0
Dus3l	0.164569	0.109343	0.241	0.206	1	1.1699	0
Tbp	0.164573	0.0507058	0.108	0.084	1	1.28571	0
Rassf8	0.164685	0.0661644	0.358	0.391	1	0.915601	0
Nos1ap	0.164727	0.104741	0.393	0.342	1	1.14912	0
Atp9b	0.165888	0.0732363	0.204	0.171	1	1.19298	0
mt-Nd4l	0.166141	0.0717304	0.786	0.792	1	0.992424	0
Baiap2	0.167022	0.0753166	0.347	0.313	1	1.10863	0
Sema4f	0.167452	0.0556108	0.235	0.202	1	1.16337	0
Nfix	0.16807	0.00159974	0.08	0.103	1	0.776699	0
Npm3	0.168263	0.0619983	0.125	0.099	1	1.26263	0
Hnrnpr	0.168496	0.118841	0.684	0.663	1	1.03167	0
2021-03-06	0.168676	0.0987385	0.76	0.747	1	1.0174	0
Faap100	0.16888	0.0921063	0.171	0.144	1	1.1875	0
Phf6	0.169272	0.0579413	0.225	0.195	1	1.15385	0
Tango2	0.169979	0.112602	0.538	0.521	1	1.03263	0
Lcor	0.170087	0.0511981	0.201	0.169	1	1.18935	0
Ube2i	0.170237	0.0599772	0.258	0.224	1	1.15179	0
Iqsec2	0.170447	0.0552325	0.178	0.148	1	1.2027	0
Mapk1ip1	0.170617	0.000582205	0.203	0.23	1	0.882609	0
Krit1	0.170621	0.131804	0.698	0.687	1	1.01601	0
Snrk	0.170659	0.00613525	0.531	0.574	1	0.925087	0
Zhx3	0.170739	0.0637514	0.163	0.136	1	1.19853	0
Cc2d1b	0.171125	0.0253467	0.116	0.091	1	1.27473	0
Pcdh19	0.171771	0.101921	0.395	0.356	1	1.10955	0
Bcl2	0.171796	0.000223915	0.145	0.171	1	0.847953	0
Dcaf17	0.171878	0.0109598	0.234	0.261	1	0.896552	0
AI314180	0.172079	0.0545759	0.361	0.319	1	1.13166	0
Samd4b	0.172091	0.0571618	0.317	0.276	1	1.14855	0
Camkv	0.172289	0.119528	0.454	0.428	1	1.06075	0
Emb	0.172415	0.0488752	0.275	0.237	1	1.16034	0
Slc48a1	0.172553	5.70142e-06	0.409	0.455	1	0.898901	0
BC017643	0.172663	0.0531384	0.112	0.088	1	1.27273	0
Gck	0.172711	0.00469696	0.165	0.193	1	0.854922	0
Sergef	0.172928	0.0709864	0.176	0.148	1	1.18919	0
Col4a2	0.172991	0.0824446	0.138	0.113	1	1.22124	0
Taf1d	0.173668	0.138161	0.493	0.484	1	1.0186	0
Sin3a	0.174038	0.0496373	0.147	0.119	1	1.23529	0
Rnf19b	0.17433	0.0393442	0.132	0.107	1	1.23364	0
Iffo2	0.175085	0.0473693	0.133	0.107	1	1.24299	0
Slitrk2	0.175213	0.108966	0.162	0.136	1	1.19118	0
1500015A07Rik	0.175336	0.0676767	0.127	0.103	1	1.23301	0
Gk	0.175973	0.0659569	0.11	0.088	1	1.25	0
Tead1	0.176323	0.0594401	0.234	0.2	1	1.17	0
Hace1	0.176433	0.0725867	0.169	0.142	1	1.19014	0
Polr2f	0.176953	0.0734626	0.414	0.385	1	1.07532	0
Mfsd11	0.177349	0.118474	0.283	0.251	1	1.12749	0
Rbfa	0.177463	0.0350703	0.128	0.103	1	1.24272	0
Actr3b	0.177506	0.048686	0.235	0.204	1	1.15196	0
Cdc7	0.177563	0.0940136	0.119	0.095	1	1.25263	0
Thap3	0.177704	0.0319676	0.369	0.397	1	0.929471	0
Ccny	0.177716	0.0148628	0.224	0.185	1	1.21081	0
Nsg2	0.177814	0.0569096	0.898	0.93	1	0.965591	0
Patl1	0.177883	0.0250883	0.104	0.08	1	1.3	0
Fuz	0.178261	0.0230242	0.126	0.15	1	0.84	0
Exoc8	0.178388	0.0319396	0.157	0.128	1	1.22656	0
2021-03-04	0.178644	0.0263946	0.125	0.099	1	1.26263	0
Mtdh	0.179422	0.133239	0.525	0.508	1	1.03346	0
Zfp12	0.179529	0.0313794	0.138	0.111	1	1.24324	0
Stxbp5l	0.179658	0.144708	0.291	0.267	1	1.08989	0
Sox4	0.180016	0.12164	0.356	0.323	1	1.10217	0
Ttc17	0.180272	0.0615005	0.136	0.111	1	1.22523	0
Prrc1	0.180358	0.0358501	0.139	0.113	1	1.23009	0
Ino80	0.180389	0.0507263	0.125	0.101	1	1.23762	0
Cul9	0.180479	0.0705532	0.259	0.22	1	1.17727	0
Clstn1	0.180813	0.0648793	0.884	0.887	1	0.996618	0
Med12l	0.181565	0.0528846	0.184	0.154	1	1.19481	0
Ap1s2	0.181633	0.170686	0.369	0.364	1	1.01374	0
Ncbp3	0.181829	0.0112347	0.179	0.21	1	0.852381	0
Tmem56	0.181928	0.0213414	0.167	0.193	1	0.865285	0
Lrpap1	0.182465	0.123239	0.577	0.556	1	1.03777	0
Pcgf3	0.183232	0.0688861	0.247	0.214	1	1.15421	0
Cgref1	0.183536	0.0740288	0.173	0.146	1	1.18493	0
Pbx3	0.183538	0.0282847	0.155	0.126	1	1.23016	0
B4galt7	0.183606	0.00808679	0.157	0.183	1	0.857923	0
Dbn1	0.183675	0.126841	0.402	0.366	1	1.09836	0
Cic	0.184045	0.077874	0.298	0.265	1	1.12453	0
Xbp1	0.184062	0.0192911	0.486	0.51	1	0.952941	0
Ttll5	0.18432	0.0431614	0.133	0.107	1	1.24299	0
Nat10	0.184869	0.0586179	0.122	0.099	1	1.23232	0
Emc10	0.185287	0.0297764	0.596	0.64	1	0.93125	0
Pde12	0.185445	0.00327464	0.111	0.086	1	1.2907	0
6430548M08Rik	0.185855	0.0552651	0.503	0.461	1	1.09111	0
Esf1	0.187926	0.014694	0.292	0.323	1	0.904025	0
Ccl27a	0.188126	0.0101732	0.435	0.479	1	0.908142	0
Mblac2	0.188574	0.0742858	0.469	0.438	1	1.07078	0
Rrbp1	0.188794	0.0595863	0.27	0.23	1	1.17391	0
Ndufa1	0.18907	0.100702	0.568	0.527	1	1.0778	0
Cd47	0.189471	0.0927789	0.86	0.848	1	1.01415	0
Creb3	0.189556	0.0494946	0.135	0.109	1	1.23853	0
Map2k5	0.190151	0.0092836	0.141	0.169	1	0.83432	0
Ttc13	0.190364	0.0469715	0.227	0.195	1	1.1641	0
Bcl9	0.190378	0.135098	0.431	0.391	1	1.1023	0
Mrps12	0.190528	0.00510111	0.47	0.51	1	0.921569	0
Arrdc1	0.19053	0.000103069	0.102	0.123	1	0.829268	0
Eftud2	0.190704	0.107477	0.244	0.21	1	1.1619	0
Terf1	0.190904	0.0106654	0.16	0.187	1	0.855615	0
Etnk2	0.191201	0.0677298	0.178	0.148	1	1.2027	0
Ccnk	0.191306	0.0452823	0.151	0.123	1	1.22764	0
Mical3	0.191682	0.0447682	0.455	0.405	1	1.12346	0
Stk38	0.191702	0.0129399	0.28	0.309	1	0.906149	0
Cdk8	0.191741	0.00760798	0.372	0.393	1	0.946565	0
Gstp1	0.19202	0.0526989	0.104	0.082	1	1.26829	0
Dgcr8	0.192117	0.0481731	0.218	0.183	1	1.19126	0
Tmem132e	0.192212	0.0271527	0.161	0.132	1	1.2197	0
Trak2	0.192424	0.0623286	0.181	0.154	1	1.17532	0
Sgsm3	0.192517	0.0806767	0.179	0.152	1	1.17763	0
Aaed1	0.192756	0.00613846	0.119	0.144	1	0.826389	0
Paqr9	0.1933	0.085353	0.344	0.3	1	1.14667	0
Ddx27	0.193843	0.0726863	0.123	0.099	1	1.24242	0
Slc36a4	0.194008	0.0622645	0.407	0.372	1	1.09409	0
Tmed8	0.194186	0.0519635	0.33	0.292	1	1.13014	0
Pus7	0.194569	0.0481101	0.105	0.082	1	1.28049	0
Gpr22	0.195336	0.0507972	0.174	0.146	1	1.19178	0
Znrf1	0.195645	0.104092	0.361	0.327	1	1.10398	0
Lhfpl3	0.19659	0.0523385	0.29	0.255	1	1.13725	0
Zfp811	0.19693	0.044163	0.183	0.152	1	1.20395	0
Ginm1	0.197292	0.0734594	0.148	0.123	1	1.20325	0
Dmxl1	0.197339	0.0123819	0.3	0.331	1	0.906344	0
Manbal	0.197413	0.123407	0.306	0.28	1	1.09286	0
Rnf4	0.197558	0.00445722	0.391	0.42	1	0.930952	0
Slc35b4	0.197609	0.0493144	0.24	0.208	1	1.15385	0
Fam174a	0.198481	0.025145	0.625	0.695	1	0.899281	0
Ppp6r3	0.199048	0.0965299	0.431	0.399	1	1.0802	0
Wrnip1	0.199119	0.00548185	0.265	0.224	1	1.18304	0
Socs7	0.20003	0.0682388	0.351	0.313	1	1.12141	0
Txndc12	0.200166	0.0670546	0.185	0.158	1	1.17089	0
Cnrip1	0.20034	0.121766	0.615	0.609	1	1.00985	0
Map2	0.200365	0.0627702	0.853	0.874	1	0.975973	0
Dffa	0.200462	0.0103599	0.172	0.198	1	0.868687	0
Slc16a11	0.201174	0.0701098	0.273	0.309	1	0.883495	0
Kdm3b	0.201224	0.0944362	0.181	0.158	1	1.14557	0
Ebna1bp2	0.201862	0.0553948	0.274	0.241	1	1.13693	0
Sbf1	0.202093	0.048842	0.193	0.163	1	1.18405	0
Pla2g15	0.202282	0.000761907	0.091	0.113	1	0.80531	0
Smndc1	0.202516	0.051663	0.197	0.167	1	1.17964	0
Gm45159	0.202639	0.0580015	0.181	0.15	1	1.20667	0
Ankzf1	0.202801	0.0143116	0.11	0.134	1	0.820896	0
Ergic2	0.203149	0.0622622	0.371	0.327	1	1.13456	0
Sec22a	0.203775	0.0107862	0.14	0.165	1	0.848485	0
Mrpl19	0.203926	0.00551084	0.229	0.259	1	0.88417	0
Isyna1	0.20394	0.107794	0.155	0.132	1	1.17424	0
Zfp26	0.203949	0.049211	0.158	0.132	1	1.19697	0
Cdc23	0.204313	0.0500491	0.213	0.181	1	1.1768	0
Rock2	0.204389	0.105517	0.6	0.599	1	1.00167	0
Fsd1l	0.204535	0.0888393	0.296	0.259	1	1.14286	0
Gpr180	0.20522	0.0742437	0.137	0.113	1	1.21239	0
Smpd1	0.205344	0.012676	0.3	0.333	1	0.900901	0
Lrsam1	0.205361	0.0565128	0.165	0.14	1	1.17857	0
Sar1a	0.205537	0.134637	0.557	0.539	1	1.0334	0
Ckmt1	0.205671	0.112126	0.475	0.451	1	1.05322	0
Apmap	0.205895	0.0971243	0.269	0.237	1	1.13502	0
Eif2ak4	0.206566	0.035961	0.118	0.093	1	1.26882	0
Mrpl34	0.206873	0.0454215	0.217	0.183	1	1.18579	0
Tor2a	0.20692	0.104721	0.113	0.093	1	1.21505	0
Mrps25	0.207591	0.00979573	0.222	0.253	1	0.87747	0
Nova1	0.20765	0.0306486	0.438	0.397	1	1.10327	0
Srsf6	0.207754	0.0863267	0.435	0.397	1	1.09572	0
Lhfpl5	0.208606	0.0332565	0.113	0.091	1	1.24176	0
Foxred1	0.208856	0.0648875	0.137	0.113	1	1.21239	0
Lsm12	0.208886	0.0519229	0.221	0.189	1	1.16931	0
Clcn3	0.209093	0.114365	0.737	0.708	1	1.04096	0
Speg	0.209295	0.010877	0.149	0.173	1	0.861272	0
Dhcr7	0.209523	0.00191622	0.172	0.198	1	0.868687	0
Colgalt1	0.209674	0.116303	0.234	0.204	1	1.14706	0
Wars	0.210054	0.0249514	0.284	0.249	1	1.14056	0
Katnb1	0.210066	0.0532948	0.102	0.082	1	1.2439	0
Gle1	0.210133	0.00696629	0.375	0.395	1	0.949367	0
Lars	0.210503	0.0148594	0.135	0.16	1	0.84375	0
Letmd1	0.211142	0.0556238	0.139	0.113	1	1.23009	0
Dennd1b	0.211353	0.0909813	0.155	0.132	1	1.17424	0
Stk19	0.211775	0.0589996	0.321	0.29	1	1.1069	0
Mfsd10	0.212295	0.146415	0.198	0.175	1	1.13143	0
Nphp1	0.212818	0.0384602	0.141	0.115	1	1.22609	0
Slc30a1	0.21287	0.0778383	0.192	0.167	1	1.1497	0
Wdr89	0.213209	0.025472	0.33	0.284	1	1.16197	0
Arl6ip5	0.213527	0.118475	0.448	0.416	1	1.07692	0
Rhou	0.213698	0.0156728	0.137	0.109	1	1.25688	0
Nipsnap3b	0.213741	0.0497879	0.114	0.093	1	1.22581	0
Zfp280b	0.214333	0.0358407	0.144	0.119	1	1.21008	0
Arl1	0.214687	0.0188123	0.487	0.516	1	0.943798	0
Fbxo25	0.214749	0.0394841	0.346	0.302	1	1.1457	0
Sgsm1	0.214851	0.0535549	0.595	0.586	1	1.01536	0
Rdh13	0.215288	0.0292469	0.192	0.22	1	0.872727	0
Cdh6	0.215934	0.0700343	0.11	0.088	1	1.25	0
Copb2	0.216114	0.0515364	0.182	0.154	1	1.18182	0
Cox20	0.216328	0.0368829	0.321	0.358	1	0.896648	0
Scn3b	0.216744	0.0128485	0.525	0.57	1	0.921053	0
Taf6	0.216753	0.107651	0.259	0.228	1	1.13596	0
Xk	0.217186	0.00803614	0.142	0.167	1	0.850299	0
Sirt5	0.217839	0.00932707	0.177	0.202	1	0.876238	0
Spns1	0.218001	0.102561	0.18	0.154	1	1.16883	0
Hspa5	0.218043	0.129448	0.572	0.558	1	1.02509	0
C2cd5	0.218381	0.118214	0.459	0.424	1	1.08255	0
Cul7	0.218545	0.0350862	0.134	0.109	1	1.22936	0
Tro	0.218583	0.0874208	0.663	0.652	1	1.01687	0
Slc25a42	0.219199	0.0480117	0.106	0.084	1	1.2619	0
Matk	0.219641	0.173069	0.631	0.617	1	1.02269	0
Man1b1	0.220069	0.0659496	0.328	0.292	1	1.12329	0
Erlin2	0.220479	0.0727044	0.269	0.239	1	1.12552	0
Jmjd8	0.220967	0.0459382	0.139	0.115	1	1.2087	0
Snrpb	0.221014	0.0232761	0.208	0.237	1	0.877637	0
Gnl2	0.221397	0.110253	0.272	0.245	1	1.1102	0
Ephb1	0.221854	0.0899288	0.226	0.2	1	1.13	0
Zfand2b	0.221948	0.00727363	0.094	0.115	1	0.817391	0
Zeb1	0.222016	0.0964119	0.372	0.34	1	1.09412	0
Ccdc84	0.222178	0.109016	0.158	0.136	1	1.16176	0
Tsc2	0.222351	0.010935	0.14	0.165	1	0.848485	0
Tpst1	0.222427	0.065109	0.192	0.165	1	1.16364	0
Comt	0.223803	0.129947	0.411	0.385	1	1.06753	0
Mtch1	0.224184	0.0605413	0.83	0.877	1	0.946408	0
Tmem110	0.224612	0.042496	0.139	0.115	1	1.2087	0
Dhx36	0.224636	0.0739415	0.531	0.5	1	1.062	0
Mindy3	0.2259	0.0438731	0.244	0.21	1	1.1619	0
Iqcb1	0.22603	0.0038035	0.277	0.302	1	0.917219	0
Dnajb1	0.226725	0.0512554	0.268	0.233	1	1.15021	0
Nek1	0.227168	0.0787642	0.17	0.146	1	1.16438	0
Zfp655	0.227399	0.0203615	0.208	0.175	1	1.18857	0
Tmem164	0.228841	0.0510794	0.139	0.115	1	1.2087	0
Fance	0.228956	0.00186533	0.102	0.121	1	0.842975	0
Tarsl2	0.229103	0.0276648	0.151	0.126	1	1.19841	0
Glrb	0.229131	0.0506042	0.57	0.535	1	1.06542	0
Zfp74	0.229238	0.0295471	0.136	0.111	1	1.22523	0
Ttf1	0.22941	0.0491356	0.107	0.086	1	1.24419	0
H13	0.229532	0.113173	0.39	0.36	1	1.08333	0
Ngrn	0.229548	0.0042036	0.306	0.329	1	0.930091	0
Srp54a	0.22959	0.0705724	0.247	0.218	1	1.13303	0
Dcbld2	0.22959	0.0544229	0.153	0.128	1	1.19531	0
Pck2	0.230604	0.0671844	0.176	0.152	1	1.15789	0
Tmem25	0.231154	0.0737948	0.226	0.195	1	1.15897	0
Lrrfip1	0.231571	0.0646915	0.189	0.163	1	1.15951	0
Tmem189	0.232035	0.0461389	0.181	0.156	1	1.16026	0
Arhgef7	0.232383	0.0507742	0.406	0.366	1	1.10929	0
Zfyve26	0.232452	0.012032	0.12	0.142	1	0.84507	0
Ube3a	0.23289	0.163347	0.987	0.988	1	0.998988	0
Epm2a	0.232951	0.0255873	0.267	0.228	1	1.17105	0
Tulp4	0.232983	0.0829604	0.724	0.745	1	0.971812	0
Calb2	0.233205	0.00129113	0.306	0.267	1	1.14607	0
Btg1	0.233273	0.0524779	0.375	0.409	1	0.91687	0
Dcp2	0.233445	0.0538201	0.359	0.315	1	1.13968	0
Bmpr2	0.233907	0.0761936	0.542	0.521	1	1.04031	0
Caskin1	0.234352	0.0541344	0.364	0.329	1	1.10638	0
Rwdd2a	0.23474	0.0332425	0.269	0.233	1	1.15451	0
Pdk1	0.234741	0.0495644	0.256	0.218	1	1.17431	0
Ccdc43	0.234915	0.0558887	0.172	0.144	1	1.19444	0
Cdc16	0.23507	0.0790858	0.164	0.14	1	1.17143	0
Htr2c	0.235212	0.0387176	0.421	0.368	1	1.14402	0
Mtmr7	0.235267	0.0237038	0.169	0.142	1	1.19014	0
Ypel4	0.237193	0.0102555	0.272	0.3	1	0.906667	0
Igdcc4	0.237713	0.0436573	0.238	0.21	1	1.13333	0
0610012G03Rik	0.238321	0.0172788	0.443	0.477	1	0.928721	0
1110046J04Rik	0.23889	0.036565	0.148	0.173	1	0.855491	0
Washc5	0.239738	0.0312188	0.117	0.095	1	1.23158	0
Dvl2	0.239991	0.0679878	0.102	0.082	1	1.2439	0
Qk	0.240181	0.0251194	0.248	0.214	1	1.15888	0
Ephb2	0.240408	0.0497091	0.147	0.123	1	1.19512	0
Hras	0.240427	0.0671493	0.693	0.718	1	0.965181	0
Uty	0.240483	0.0745105	0.171	0.148	1	1.15541	0
Tnik	0.2405	0.111603	0.68	0.671	1	1.01341	0
Nt5dc3	0.24051	0.0775885	0.301	0.278	1	1.08273	0
Ahi1	0.240768	0.0219473	0.908	0.953	1	0.952781	0
Arhgap36	0.240917	0.0521572	0.286	0.253	1	1.13043	0
Sox1	0.240928	0.0341753	0.103	0.084	1	1.22619	0
Birc6	0.241245	0.0786229	0.512	0.502	1	1.01992	0
Mcf2l	0.241458	0.00874669	0.404	0.424	1	0.95283	0
Pdzd4	0.242112	0.06139	0.308	0.274	1	1.12409	0
Cpeb1	0.242241	0.0443508	0.232	0.202	1	1.14851	0
Ddx46	0.242339	0.00490818	0.273	0.296	1	0.922297	0
Jakmip3	0.242603	0.0314031	0.142	0.119	1	1.19328	0
Hacd2	0.24274	0.0258312	0.129	0.105	1	1.22857	0
Tmcc3	0.242818	0.114377	0.421	0.399	1	1.05514	0
Gpr155	0.24392	0.064267	0.113	0.095	1	1.18947	0
Mettl2	0.24401	0.0946136	0.183	0.16	1	1.14375	0
Atp11a	0.24403	0.0515387	0.245	0.212	1	1.15566	0
Parg	0.244164	0.0337805	0.152	0.128	1	1.1875	0
Rnf138	0.244498	0.0630976	0.223	0.191	1	1.16754	0
Camk2d	0.244839	0.00720965	0.651	0.7	1	0.93	0
Eprs	0.245369	0.0509119	0.316	0.286	1	1.1049	0
Slc7a14	0.245497	0.0292696	0.523	0.562	1	0.930605	0
Aatf	0.245508	0.0643634	0.132	0.111	1	1.18919	0
Il1rapl1	0.246276	0.105874	0.192	0.171	1	1.12281	0
Uxs1	0.24652	0.102568	0.202	0.177	1	1.14124	0
Tmem132b	0.246643	0.0130382	0.262	0.288	1	0.909722	0
Entpd6	0.247672	0.14409	0.424	0.407	1	1.04177	0
Rnpep	0.247932	0.145267	0.289	0.259	1	1.11583	0
Usp45	0.248076	0.056586	0.225	0.195	1	1.15385	0
Chordc1	0.248173	0.0180604	0.368	0.389	1	0.946015	0
Etfdh	0.24855	0.0404709	0.111	0.091	1	1.21978	0
Rab11fip3	0.248756	0.0398026	0.16	0.136	1	1.17647	0
Lnpep	0.248899	0.113546	0.587	0.582	1	1.00859	0
Tpd52l1	0.249108	0.0444514	0.197	0.171	1	1.15205	0
Zfp282	0.249237	0.00181806	0.098	0.117	1	0.837607	0
Serinc3	0.249956	0.0144079	0.392	0.432	1	0.907407	0
Anapc1	0.250569	0.0737185	0.304	0.274	1	1.10949	0
Osgep	0.250985	0.059535	0.126	0.105	1	1.2	0
Lztfl1	0.251053	0.0264798	0.437	0.481	1	0.908524	0
Phactr2	0.251233	0.0186799	0.155	0.128	1	1.21094	0
Phrf1	0.251289	0.0453098	0.149	0.126	1	1.18254	0
Ssr2	0.251757	0.00307871	0.238	0.265	1	0.898113	0
Anapc5	0.252416	0.10831	0.586	0.553	1	1.05967	0
Gpd1l	0.25271	0.0470042	0.272	0.241	1	1.12863	0
H2afy2	0.253427	0.0258638	0.118	0.097	1	1.21649	0
Strap	0.253865	0.035252	0.445	0.412	1	1.0801	0
Strn3	0.254079	0.00116728	0.485	0.519	1	0.934489	0
Nhsl2	0.254295	0.0522459	0.262	0.23	1	1.13913	0
Dennd6a	0.255313	0.055337	0.157	0.134	1	1.17164	0
Rnf169	0.25572	0.0493802	0.17	0.146	1	1.16438	0
Herpud1	0.255758	0.0912143	0.285	0.255	1	1.11765	0
Plxna3	0.256042	0.00687564	0.154	0.175	1	0.88	0
Phkg2	0.256123	0.0181412	0.413	0.438	1	0.942922	0
Tmem245	0.256265	0.0986274	0.483	0.463	1	1.0432	0
Cr1l	0.256418	0.0412161	0.115	0.095	1	1.21053	0
2900076A07Rik	0.257167	0.0547201	0.166	0.14	1	1.18571	0
Trub1	0.25751	0.0650483	0.161	0.138	1	1.16667	0
Dcun1d5	0.257822	0.119496	0.439	0.418	1	1.05024	0
Med25	0.25784	0.0227035	0.201	0.169	1	1.18935	0
Ppp5c	0.257892	0.00654108	0.315	0.348	1	0.905172	0
Kif5b	0.258016	0.0809107	0.707	0.73	1	0.968493	0
Acbd3	0.258604	0.0251469	0.221	0.191	1	1.15707	0
Stx3	0.259014	0.117128	0.273	0.247	1	1.10526	0
Xpo6	0.259168	0.0943433	0.341	0.309	1	1.10356	0
Ppcdc	0.259613	0.0476907	0.112	0.093	1	1.2043	0
Bet1	0.259734	0.0116998	0.086	0.105	1	0.819048	0
Ing2	0.259768	0.0469281	0.241	0.21	1	1.14762	0
Nudt16l1	0.260568	0.0618571	0.224	0.193	1	1.16062	0
2021-03-02	0.26061	0.0299371	0.129	0.105	1	1.22857	0
Nptn	0.261029	0.0514862	0.691	0.687	1	1.00582	0
Gm27032	0.261085	0.0162751	0.145	0.169	1	0.857988	0
Clstn3	0.261115	0.0666682	0.72	0.73	1	0.986301	0
Wnk3	0.261241	0.044438	0.304	0.265	1	1.14717	0
Slc22a15	0.261653	0.0500232	0.117	0.097	1	1.20619	0
Agrn	0.261847	0.0394361	0.29	0.255	1	1.13725	0
Ddhd1	0.262133	0.0773473	0.333	0.305	1	1.0918	0
Cstf2	0.262493	0.109006	0.418	0.391	1	1.06905	0
Thap1	0.262568	0.0648347	0.119	0.099	1	1.20202	0
Glul	0.26307	0.0726605	0.272	0.243	1	1.11934	0
Parn	0.263122	0.0879173	0.186	0.163	1	1.1411	0
Inpp5e	0.263283	0.0624886	0.171	0.146	1	1.17123	0
Mrps10	0.263348	0.0103216	0.295	0.323	1	0.913313	0
Wipf3	0.263445	0.0679857	0.154	0.132	1	1.16667	0
Fam208b	0.264152	0.0664827	0.144	0.123	1	1.17073	0
Nprl2	0.26449	0.042354	0.14	0.117	1	1.19658	0
Clk3	0.264549	0.0907892	0.226	0.202	1	1.11881	0
Coro2a	0.264717	0.0266224	0.156	0.134	1	1.16418	0
Ikbip	0.264885	0.062914	0.137	0.117	1	1.17094	0
Trim39	0.265621	0.0545397	0.125	0.107	1	1.16822	0
Man2b1	0.265725	0.00983728	0.182	0.202	1	0.90099	0
Snhg20	0.265962	0.208197	0.564	0.549	1	1.02732	0
Rgs9	0.266252	0.0285867	0.13	0.107	1	1.21495	0
Sc5d	0.266994	0.0144635	0.319	0.352	1	0.90625	0
Cog5	0.267319	0.0308299	0.218	0.243	1	0.897119	0
Cdc37l1	0.267496	0.0138161	0.525	0.562	1	0.934164	0
AI504432	0.267633	0.0947129	0.44	0.42	1	1.04762	0
Fam57b	0.267894	0.0294969	0.243	0.274	1	0.886861	0
Zfp397	0.267952	0.0879709	0.254	0.224	1	1.13393	0
Hcn3	0.268054	0.000291956	0.193	0.216	1	0.893519	0
Wdr1	0.268549	0.0687853	0.416	0.391	1	1.06394	0
Opcml	0.268574	0.0925332	0.728	0.689	1	1.0566	0
Ryr3	0.268593	0.0542148	0.147	0.123	1	1.19512	0
Fam219b	0.26862	0.00777264	0.171	0.142	1	1.20423	0
Ddx5	0.268679	0.0526502	0.865	0.899	1	0.96218	0
Cx3cl1	0.268717	0.0543958	0.661	0.66	1	1.00152	0
Ppa2	0.268751	0.0304447	0.141	0.117	1	1.20513	0
Dusp11	0.26894	0.103561	0.327	0.298	1	1.09732	0
Dnajc2	0.269236	0.0511758	0.206	0.181	1	1.13812	0
Morc3	0.269459	0.0490786	0.125	0.105	1	1.19048	0
Sclt1	0.26951	0.0772156	0.237	0.21	1	1.12857	0
Cope	0.269634	0.00731577	0.319	0.34	1	0.938235	0
Stat5b	0.269709	0.0358416	0.25	0.214	1	1.16822	0
Cers6	0.269872	0.0739758	0.26	0.23	1	1.13043	0
Kifc3	0.270859	0.0380078	0.143	0.121	1	1.18182	0
Gria4	0.271053	0.00740729	0.334	0.368	1	0.907609	0
Gm49336	0.272206	0.0403503	0.245	0.218	1	1.12385	0
Slc38a6	0.272245	0.0506636	0.119	0.099	1	1.20202	0
Flot2	0.272254	0.0637421	0.423	0.399	1	1.06015	0
Tcf12	0.273019	0.0158244	0.206	0.228	1	0.903509	0
Wiz	0.273048	0.0563978	0.105	0.086	1	1.22093	0
1810030O07Rik	0.27422	0.0513412	0.191	0.165	1	1.15758	0
Txndc15	0.275266	0.0787612	0.387	0.35	1	1.10571	0
Eid2b	0.275298	0.0420795	0.148	0.123	1	1.20325	0
Pank3	0.275387	0.0393252	0.277	0.251	1	1.10359	0
Rgs19	0.275557	0.0516408	0.185	0.16	1	1.15625	0
Polr2c	0.276298	0.00361048	0.288	0.311	1	0.926045	0
Selenoi	0.276793	0.0510721	0.377	0.342	1	1.10234	0
Chka	0.27691	0.124703	0.593	0.564	1	1.05142	0
4930447C04Rik	0.276986	0.00720116	0.176	0.2	1	0.88	0
Aak1	0.277059	0.0797497	0.664	0.658	1	1.00912	0
Nefm	0.277165	0.0422902	0.166	0.142	1	1.16901	0
Vps13a	0.277196	0.0928449	0.347	0.323	1	1.0743	0
Ucp2	0.277472	0.0218444	0.103	0.084	1	1.22619	0
Sec13	0.277709	0.0895644	0.146	0.128	1	1.14062	0
Tmem250-ps	0.277775	0.0532605	0.317	0.286	1	1.10839	0
Mt1	0.278237	0.101302	0.446	0.412	1	1.08252	0
Bace1	0.27858	0.08777	0.359	0.329	1	1.09119	0
Dpf2	0.278586	0.0227688	0.236	0.261	1	0.904215	0
Hexim2	0.279191	0.0285185	0.156	0.13	1	1.2	0
Schip1	0.27947	0.00433555	0.099	0.117	1	0.846154	0
Gpr61	0.279558	0.0391644	0.143	0.121	1	1.18182	0
Fuca2	0.279573	0.066905	0.255	0.228	1	1.11842	0
L3mbtl3	0.279685	0.0395446	0.164	0.142	1	1.15493	0
Rhot2	0.280029	0.0560335	0.256	0.224	1	1.14286	0
Rock1	0.280059	0.0127491	0.165	0.189	1	0.873016	0
Eipr1	0.280079	0.0503631	0.159	0.138	1	1.15217	0
Nelfa	0.280367	0.0381509	0.147	0.126	1	1.16667	0
Kmt2d	0.280514	0.0770077	0.277	0.253	1	1.09486	0
Wwp1	0.280542	0.0260229	0.186	0.16	1	1.1625	0
Dicer1	0.280634	0.0215745	0.378	0.422	1	0.895735	0
Amn1	0.281445	0.149571	0.383	0.366	1	1.04645	0
Tor1a	0.28168	0.0486988	0.206	0.179	1	1.15084	0
Ppan	0.281744	0.0466691	0.11	0.091	1	1.20879	0
Pigu	0.282138	0.0434853	0.107	0.088	1	1.21591	0
Fam184a	0.282837	0.0282817	0.176	0.204	1	0.862745	0
Pde7a	0.283266	0.0660536	0.186	0.165	1	1.12727	0
Csf2ra	0.283455	0.0915218	0.128	0.109	1	1.17431	0
Mcmbp	0.283647	0.052405	0.236	0.208	1	1.13462	0
Gnai2	0.283662	0.0653027	0.69	0.712	1	0.969101	0
Txlng	0.283712	0.0524891	0.19	0.165	1	1.15152	0
Tarbp2	0.283714	0.090352	0.164	0.142	1	1.15493	0
Adcy6	0.283724	0.0759565	0.197	0.173	1	1.13873	0
Madd	0.284042	0.0231671	0.536	0.58	1	0.924138	0
Gm26724	0.284052	0.129863	0.225	0.204	1	1.10294	0
Ncstn	0.284799	0.0414395	0.168	0.142	1	1.1831	0
Pet100	0.285042	0.111536	0.328	0.302	1	1.08609	0
Abhd11	0.285853	0.00145341	0.204	0.226	1	0.902655	0
Pitpnm1	0.286099	0.111829	0.369	0.348	1	1.06034	0
Zmym6	0.286249	0.0706667	0.117	0.099	1	1.18182	0
Mynn	0.286757	0.00600209	0.161	0.179	1	0.899441	0
Myef2	0.286885	0.0783949	0.535	0.506	1	1.05731	0
Tma16	0.287576	0.0798297	0.157	0.134	1	1.17164	0
Dpm2	0.287652	0.00377528	0.384	0.405	1	0.948148	0
Tmem57	0.287951	0.0969561	0.522	0.494	1	1.05668	0
Ncam2	0.288192	0.116374	0.26	0.233	1	1.11588	0
Zfp950	0.288324	0.139847	0.462	0.463	1	0.99784	0
Lrp8	0.288365	0.0681248	0.221	0.198	1	1.11616	0
Gm42418	0.288389	0.0857141	0.543	0.527	1	1.03036	0
Dnah1	0.288471	0.0646204	0.135	0.115	1	1.17391	0
Ap1b1	0.288677	0.0316307	0.445	0.407	1	1.09337	0
Snrnp40	0.288893	0.0511923	0.148	0.126	1	1.1746	0
Srsf7	0.289015	0.00447001	0.494	0.5	1	0.988	0
Ist1	0.289175	0.00151318	0.288	0.309	1	0.932039	0
Mrps17	0.289745	0.00566992	0.311	0.331	1	0.939577	0
Tmem14c	0.289998	0.0216786	0.127	0.146	1	0.869863	0
Cnih2	0.290431	0.0880577	0.693	0.72	1	0.9625	0
Csf1	0.290534	0.0153189	0.107	0.086	1	1.24419	0
2510039O18Rik	0.290585	0.0256747	0.125	0.105	1	1.19048	0
Fkbp5	0.29069	0.0369056	0.181	0.154	1	1.17532	0
Abca3	0.291485	0.101846	0.378	0.356	1	1.0618	0
Tm2d2	0.29168	0.0956992	0.328	0.302	1	1.08609	0
Abhd16a	0.292118	0.0643196	0.249	0.222	1	1.12162	0
C230004F18Rik	0.292525	0.103268	0.541	0.525	1	1.03048	0
Jmjd1c	0.292574	0.081201	0.426	0.395	1	1.07848	0
Ankrd44	0.292951	0.00551092	0.174	0.195	1	0.892308	0
Zfx	0.293292	0.0160669	0.122	0.101	1	1.20792	0
Parvb	0.29358	0.0826213	0.139	0.119	1	1.16807	0
Vps9d1	0.293894	0.087367	0.278	0.253	1	1.09881	0
Gm2a	0.294209	0.0525128	0.141	0.121	1	1.16529	0
Ift57	0.294373	0.044194	0.124	0.103	1	1.20388	0
Foxj3	0.2945	0.00325344	0.418	0.449	1	0.930958	0
Zfp160	0.294666	0.0194955	0.117	0.136	1	0.860294	0
Vmac	0.294913	0.0370399	0.107	0.088	1	1.21591	0
Gm47438	0.294991	0.0544446	0.107	0.091	1	1.17582	0
Scyl2	0.295467	0.0561495	0.192	0.169	1	1.13609	0
Prdm15	0.295517	0.0501557	0.122	0.103	1	1.18447	0
Map4k5	0.295809	0.0389822	0.138	0.119	1	1.15966	0
Zfp275	0.295888	0.0426591	0.265	0.237	1	1.11814	0
Panx2	0.29623	0.0275977	0.193	0.163	1	1.18405	0
Taf2	0.296304	0.0520174	0.173	0.15	1	1.15333	0
Zfp157	0.296364	0.15159	0.447	0.426	1	1.0493	0
Cabin1	0.296636	0.0531902	0.314	0.278	1	1.1295	0
Lrtm2	0.297696	0.00363519	0.221	0.243	1	0.909465	0
Slc39a1	0.297972	0.0141385	0.138	0.158	1	0.873418	0
Slc38a10	0.298069	0.0472816	0.208	0.183	1	1.13661	0
Psmd13	0.298395	0.0559927	0.21	0.185	1	1.13514	0
Zdhhc6	0.298779	0.0828653	0.259	0.23	1	1.12609	0
Iqce	0.298817	0.0330609	0.226	0.198	1	1.14141	0
Hook3	0.298836	0.0147127	0.59	0.617	1	0.95624	0
3830406C13Rik	0.299117	0.0112121	0.313	0.329	1	0.951368	0
Hpcal1	0.299167	0.00612737	0.475	0.434	1	1.09447	0
Wbp1	0.29924	0.0363794	0.203	0.226	1	0.89823	0
Cenpc1	0.299251	0.0187921	0.224	0.247	1	0.906883	0
Taz	0.299264	0.126953	0.49	0.463	1	1.05832	0
Eml4	0.300332	0.0657339	0.15	0.13	1	1.15385	0
A430005L14Rik	0.300429	0.0125995	0.215	0.239	1	0.899582	0
Il13ra1	0.300527	0.0253438	0.117	0.097	1	1.20619	0
Nsun5	0.300657	0.0345214	0.083	0.101	1	0.821782	0
Rfx7	0.300803	0.00594603	0.253	0.274	1	0.923358	0
Cul5	0.301579	0.00318464	0.367	0.383	1	0.958225	0
Plbd2	0.302068	0.0603458	0.25	0.22	1	1.13636	0
Nadk	0.302203	0.0543196	0.144	0.123	1	1.17073	0
Adrm1	0.303938	0.0606058	0.206	0.179	1	1.15084	0
Dzip1	0.304433	0.0529544	0.33	0.305	1	1.08197	0
Usp47	0.304796	0.0628151	0.395	0.37	1	1.06757	0
Cobl	0.304903	0.0414916	0.192	0.169	1	1.13609	0
Sptan1	0.305181	0.0419523	0.622	0.588	1	1.05782	0
Gipc1	0.305272	0.0049304	0.12	0.14	1	0.857143	0
Mapk14	0.305401	0.0318292	0.232	0.206	1	1.12621	0
Tmem41b	0.30579	0.00686625	0.366	0.389	1	0.940874	0
Pdia3	0.305852	0.0649041	0.397	0.366	1	1.0847	0
Tpp1	0.306096	0.0628967	0.178	0.154	1	1.15584	0
Flvcr1	0.306258	0.0480285	0.132	0.113	1	1.16814	0
Sgce	0.30629	0.0911488	0.22	0.198	1	1.11111	0
Slc8a3	0.307107	0.0510046	0.141	0.119	1	1.18487	0
Abhd18	0.307299	0.0932473	0.398	0.372	1	1.06989	0
Flot1	0.307579	0.0579205	0.266	0.239	1	1.11297	0
Tfam	0.307733	0.0236591	0.203	0.175	1	1.16	0
Dnajc1	0.307943	0.0331534	0.123	0.103	1	1.19417	0
Srp72	0.307993	0.0232038	0.491	0.551	1	0.891107	0
Abcb10	0.308633	0.0244625	0.239	0.206	1	1.16019	0
Hook1	0.308714	0.10605	0.463	0.426	1	1.08685	0
Ulk1	0.309205	0.0362912	0.262	0.235	1	1.11489	0
Chpf2	0.309278	0.0953663	0.225	0.204	1	1.10294	0
Prrc2a	0.309281	0.0821201	0.449	0.424	1	1.05896	0
Ergic3	0.309407	0.0798084	0.522	0.508	1	1.02756	0
Pkib	0.309583	0.0459187	0.114	0.097	1	1.17526	0
Plpp6	0.309877	0.0444292	0.207	0.181	1	1.14365	0
Jmjd6	0.310549	0.0256215	0.182	0.202	1	0.90099	0
Nup50	0.310598	0.0207623	0.219	0.193	1	1.13472	0
Ciao1	0.310685	0.025845	0.15	0.13	1	1.15385	0
AI597479	0.311006	0.0584497	0.202	0.181	1	1.11602	0
Cbx7	0.311101	0.00480543	0.22	0.237	1	0.92827	0
Dtx1	0.311616	0.0412538	0.35	0.315	1	1.11111	0
A230050P20Rik	0.311857	0.0862356	0.331	0.305	1	1.08525	0
Pnisr	0.311893	0.0329838	0.831	0.862	1	0.964037	0
Nf1	0.312083	0.0157014	0.437	0.459	1	0.95207	0
Itsn2	0.312486	0.0902819	0.334	0.311	1	1.07395	0
Phax	0.312713	0.0474898	0.321	0.29	1	1.1069	0
Samd8	0.312716	0.128273	0.341	0.323	1	1.05573	0
Tmx3	0.312775	0.0559315	0.402	0.368	1	1.09239	0
Armc10	0.313307	0.0152559	0.131	0.109	1	1.20183	0
Ptbp3	0.31342	0.0583288	0.106	0.088	1	1.20455	0
Nup210	0.31357	0.0837244	0.104	0.088	1	1.18182	0
Nipa1	0.313664	0.0505751	0.146	0.128	1	1.14062	0
B4gat1	0.313678	0.0690621	0.371	0.342	1	1.0848	0
Mrgbp	0.313891	0.0349834	0.142	0.121	1	1.17355	0
Slco3a1	0.314691	0.0764696	0.268	0.245	1	1.09388	0
Mtif2	0.314785	0.0207072	0.248	0.27	1	0.918519	0
Sec31a	0.314894	0.0489315	0.29	0.255	1	1.13725	0
Celf1	0.315019	0.0585676	0.688	0.693	1	0.992785	0
Ccdc66	0.315026	0.0152839	0.184	0.206	1	0.893204	0
Med29	0.316081	0.0207661	0.113	0.095	1	1.18947	0
Tox3	0.316622	0.00634501	0.108	0.088	1	1.22727	0
Fam220a	0.316873	0.0125321	0.398	0.412	1	0.966019	0
Hnrnpu	0.31749	0.0118022	0.728	0.774	1	0.940568	0
Vps54	0.317733	0.00132116	0.12	0.136	1	0.882353	0
Ago2	0.318043	0.00223022	0.531	0.566	1	0.938163	0
Dst	0.318214	0.0826667	0.781	0.778	1	1.00386	0
Git2	0.318479	0.0944184	0.363	0.335	1	1.08358	0
Tbl3	0.318762	0.0904473	0.142	0.123	1	1.15447	0
Hadhb	0.319658	0.0208704	0.194	0.216	1	0.898148	0
Inpp4b	0.319676	0.033708	0.108	0.126	1	0.857143	0
Casp3	0.319873	0.0377844	0.116	0.097	1	1.19588	0
Chd8	0.31993	0.12209	0.494	0.492	1	1.00407	0
Papola	0.320048	0.0583919	0.507	0.469	1	1.08102	0
Fam208a	0.32011	0.0114401	0.279	0.3	1	0.93	0
Snph	0.320281	0.0251334	0.349	0.315	1	1.10794	0
Ankrd13d	0.320987	0.0970337	0.223	0.204	1	1.09314	0
Tmem145	0.321029	0.0870255	0.343	0.311	1	1.10289	0
Zfp422	0.321366	0.00329205	0.203	0.22	1	0.922727	0
Rims2	0.321449	0.0840341	0.558	0.533	1	1.0469	0
Exoc1	0.322347	0.0434119	0.249	0.22	1	1.13182	0
Fam161b	0.322729	0.0392434	0.135	0.115	1	1.17391	0
Rprd2	0.323218	0.00153855	0.395	0.414	1	0.954106	0
Eif4g1	0.323798	0.0654777	0.489	0.531	1	0.920904	0
Rpe	0.323865	0.0506255	0.131	0.111	1	1.18018	0
Kcnk3	0.324159	0.0512587	0.236	0.212	1	1.11321	0
Slit1	0.324245	0.00506011	0.109	0.091	1	1.1978	0
Cul1	0.324445	0.00359079	0.375	0.385	1	0.974026	0
Adsl	0.325299	0.0255002	0.125	0.107	1	1.16822	0
Pcm1	0.325398	0.00853135	0.42	0.451	1	0.931264	0
Pibf1	0.325727	0.0325871	0.136	0.115	1	1.18261	0
Prmt3	0.325978	0.0483819	0.119	0.101	1	1.17822	0
Scamp1	0.326019	0.0901449	0.688	0.693	1	0.992785	0
Tmem165	0.326048	0.0746963	0.246	0.222	1	1.10811	0
3110021N24Rik	0.326051	0.000315892	0.252	0.272	1	0.926471	0
Alas1	0.326107	0.0451893	0.109	0.093	1	1.17204	0
B3galnt1	0.326361	0.00464024	0.338	0.36	1	0.938889	0
Kdm2b	0.326557	0.0909264	0.18	0.16	1	1.125	0
Scarb1	0.32777	0.0765138	0.291	0.261	1	1.11494	0
Pnpla6	0.327821	0.0510665	0.211	0.185	1	1.14054	0
P4htm	0.327859	0.00607877	0.248	0.267	1	0.928839	0
Tmod3	0.329561	0.059509	0.142	0.123	1	1.15447	0
Apex1	0.329888	0.00480077	0.132	0.15	1	0.88	0
Dad1	0.330031	0.113439	0.402	0.379	1	1.06069	0
Ly6e	0.330091	0.085654	0.492	0.475	1	1.03579	0
Ube2d3	0.330333	0.00496825	0.736	0.788	1	0.93401	0
Rtn1	0.330652	0.030572	0.974	0.992	1	0.981855	0
Armt1	0.331796	0.0341154	0.114	0.097	1	1.17526	0
Phf20l1	0.332161	0.0121277	0.473	0.5	1	0.946	0
Efcab1	0.332393	0.0479899	0.171	0.148	1	1.15541	0
Tmem59	0.33246	0.100276	0.627	0.638	1	0.982759	0
Dapk1	0.332489	0.0613132	0.361	0.327	1	1.10398	0
Gmcl1	0.332687	0.00635076	0.276	0.294	1	0.938776	0
Susd6	0.33332	0.0520125	0.114	0.097	1	1.17526	0
Dag1	0.333351	0.0133324	0.262	0.286	1	0.916084	0
Fgd4	0.333578	0.0647998	0.319	0.288	1	1.10764	0
Exoc6b	0.333674	0.00562382	0.32	0.344	1	0.930233	0
Mier3	0.333694	0.0218065	0.168	0.146	1	1.15068	0
Usp53	0.334627	0.0318738	0.147	0.167	1	0.88024	0
Ttc14	0.334639	0.0642233	0.777	0.8	1	0.97125	0
Actl6b	0.334649	0.0210278	0.278	0.298	1	0.932886	0
Mrpl55	0.334918	0.00235333	0.202	0.222	1	0.90991	0
Arfip2	0.335265	0.000473892	0.283	0.302	1	0.937086	0
Ankrd17	0.33579	0.0534917	0.677	0.656	1	1.03201	0
Capn5	0.335793	0.019348	0.13	0.111	1	1.17117	0
Srm	0.336328	0.0781437	0.167	0.148	1	1.12838	0
Brinp1	0.336655	0.0299133	0.388	0.35	1	1.10857	0
Lynx1	0.337367	0.0446564	0.506	0.473	1	1.06977	0
Rasgrf1	0.3378	0.0857534	0.567	0.543	1	1.0442	0
Mcoln1	0.338116	0.0424583	0.157	0.138	1	1.13768	0
Galnt1	0.338185	0.0956958	0.3	0.274	1	1.09489	0
Lsm2	0.338939	0.0261201	0.141	0.121	1	1.16529	0
Mfsd14b	0.339227	0.010722	0.232	0.206	1	1.12621	0
Lpcat4	0.339281	0.0400253	0.121	0.103	1	1.17476	0
Cpne3	0.339416	0.0409815	0.103	0.086	1	1.19767	0
Dcaf6	0.339716	0.00995995	0.151	0.169	1	0.893491	0
Izumo4	0.33975	0.115261	0.335	0.311	1	1.07717	0
Exoc5	0.33984	0.0469737	0.41	0.379	1	1.08179	0
Gps2	0.339896	0.0593249	0.144	0.126	1	1.14286	0
R3hdm4	0.339936	0.0609941	0.274	0.251	1	1.09163	0
Gm9856	0.340005	0.090144	0.4	0.374	1	1.06952	0
Rnd3	0.340119	0.0403124	0.178	0.154	1	1.15584	0
Slc33a1	0.340308	0.0801835	0.156	0.138	1	1.13043	0
Pigk	0.340727	0.0630791	0.467	0.424	1	1.10142	0
Otub1	0.340736	0.00043833	0.617	0.663	1	0.930618	0
Snapc4	0.340983	0.0408757	0.117	0.099	1	1.18182	0
Tmem147	0.341114	0.0673283	0.362	0.327	1	1.10703	0
AC160336.1	0.341233	0.0628824	0.478	0.459	1	1.04139	0
Cavin3	0.341393	0.00151195	0.101	0.117	1	0.863248	0
Ttc3	0.341539	0.0286159	0.971	0.996	1	0.9749	0
Iqgap1	0.34196	0.000369087	0.15	0.169	1	0.887574	0
Rapgefl1	0.342087	0.0207765	0.167	0.144	1	1.15972	0
Prelid3b	0.342726	0.0539814	0.271	0.249	1	1.08835	0
Smarca2	0.342785	0.0582005	0.654	0.683	1	0.95754	0
Fkbp1a	0.342924	0.0350064	0.78	0.837	1	0.9319	0
Reps2	0.34305	0.0251196	0.403	0.432	1	0.93287	0
Mtg1	0.343675	0.0411993	0.11	0.093	1	1.1828	0
Tial1	0.343797	0.116395	0.549	0.531	1	1.0339	0
Dcaf5	0.344111	0.0387226	0.333	0.3	1	1.11	0
Man2a2	0.344128	0.0315572	0.451	0.473	1	0.953488	0
Smim20	0.344507	0.0448662	0.278	0.298	1	0.932886	0
Insr	0.344564	0.0464373	0.212	0.189	1	1.12169	0
Tulp3	0.344937	0.0363343	0.151	0.13	1	1.16154	0
Mettl26	0.345078	0.0802784	0.358	0.387	1	0.925065	0
Gm996	0.345295	0.026	0.163	0.14	1	1.16429	0
Cacng4	0.345491	0.0454084	0.326	0.296	1	1.10135	0
Ncan	0.345534	0.0837432	0.233	0.216	1	1.0787	0
Dph7	0.346308	0.0212313	0.104	0.121	1	0.859504	0
Synj2bp	0.346579	0.00596518	0.444	0.459	1	0.96732	0
Rgs3	0.346711	0.0279605	0.107	0.091	1	1.17582	0
Pard3	0.346974	0.0468066	0.197	0.177	1	1.11299	0
Ero1lb	0.34724	0.0486654	0.116	0.099	1	1.17172	0
Pcgf5	0.347423	0.0229877	0.361	0.387	1	0.932817	0
Fam173a	0.347451	0.0570534	0.534	0.564	1	0.946809	0
Zfyve9	0.347845	0.0283895	0.254	0.224	1	1.13393	0
Ptn	0.348027	0.0351246	0.292	0.329	1	0.887538	0
Wbp1l	0.348108	0.0258278	0.112	0.095	1	1.17895	0
Erg28	0.349154	0.0570446	0.35	0.321	1	1.09034	0
Msantd2	0.349605	0.0160391	0.11	0.128	1	0.859375	0
Phpt1	0.350499	0.0395681	0.131	0.113	1	1.15929	0
Taok2	0.351155	0.013887	0.262	0.228	1	1.14912	0
Crlf2	0.35148	0.002668	0.164	0.179	1	0.916201	0
Ppib	0.351564	0.030005	0.224	0.198	1	1.13131	0
Adpgk	0.351631	0.0553202	0.172	0.15	1	1.14667	0
Ttyh1	0.351915	0.0427468	0.287	0.313	1	0.916933	0
Cib2	0.351949	0.0322568	0.499	0.457	1	1.0919	0
Ccnc	0.352205	0.0759341	0.258	0.233	1	1.1073	0
Eif4enif1	0.352405	0.041592	0.198	0.175	1	1.13143	0
Mtx1	0.352432	0.0639755	0.127	0.111	1	1.14414	0
Tubgcp3	0.352451	0.0431924	0.199	0.175	1	1.13714	0
Phactr3	0.352774	0.0684386	0.38	0.354	1	1.07345	0
Actl6a	0.352867	0.0164335	0.276	0.29	1	0.951724	0
Slc45a4	0.353583	0.0259922	0.155	0.134	1	1.15672	0
Cwc25	0.353702	0.0574671	0.127	0.111	1	1.14414	0
Chd1	0.354612	0.0257522	0.167	0.144	1	1.15972	0
Suv39h1	0.35486	0.0313838	0.21	0.183	1	1.14754	0
Hnrnpll	0.35502	0.00706414	0.206	0.222	1	0.927928	0
Tm9sf2	0.355615	0.0134195	0.522	0.547	1	0.954296	0
Zswim8	0.355982	0.0698701	0.356	0.329	1	1.08207	0
Rogdi	0.356792	0.0421548	0.492	0.521	1	0.944338	0
Arpc3	0.356933	0.052323	0.355	0.327	1	1.08563	0
L1cam	0.35705	0.0817966	0.615	0.588	1	1.04592	0
Bcl7c	0.357067	0.00703068	0.229	0.249	1	0.919679	0
Clptm1l	0.357161	0.0897293	0.32	0.302	1	1.0596	0
Ascc3	0.357178	0.0381603	0.188	0.208	1	0.903846	0
Zfp329	0.357717	0.0817958	0.433	0.407	1	1.06388	0
Npc1	0.35798	0.0752581	0.214	0.191	1	1.12042	0
Ogfr	0.358174	0.0210028	0.132	0.113	1	1.16814	0
Abca2	0.358722	0.0928736	0.523	0.492	1	1.06301	0
Mapk3	0.359973	0.0532536	0.37	0.354	1	1.0452	0
Cyth3	0.360491	0.00637692	0.125	0.14	1	0.892857	0
Tmem167	0.361067	0.00843166	0.396	0.409	1	0.968215	0
Mir124-2hg	0.361325	0.0233335	0.334	0.358	1	0.932961	0
Ybx1	0.361346	0.0285263	0.465	0.49	1	0.94898	0
Dhx30	0.36162	0.172004	0.634	0.611	1	1.03764	0
Tgfbrap1	0.362063	0.0156555	0.154	0.134	1	1.14925	0
Cspp1	0.3626	0.0620211	0.409	0.44	1	0.929545	0
Brd3os	0.362664	0.0666894	0.153	0.134	1	1.14179	0
Brd7	0.362858	0.0527909	0.295	0.27	1	1.09259	0
Papolg	0.363364	0.0106811	0.14	0.121	1	1.15702	0
Wdr35	0.3639	0.034012	0.212	0.189	1	1.12169	0
Prpf40a	0.36411	0.0394159	0.375	0.337	1	1.11276	0
Mtmr2	0.364867	0.0135853	0.125	0.107	1	1.16822	0
Macrod2	0.365357	0.0475842	0.431	0.465	1	0.926882	0
Dcp1a	0.36546	0.0369269	0.101	0.086	1	1.17442	0
Yipf2	0.36604	0.0818953	0.152	0.136	1	1.11765	0
Vps13c	0.366224	0.0748583	0.281	0.261	1	1.07663	0
Prrt1	0.366396	0.0678041	0.407	0.377	1	1.07958	0
Pdlim7	0.366415	0.155833	0.354	0.333	1	1.06306	0
Lrrc75b	0.367253	0.0272641	0.204	0.179	1	1.13966	0
Lrrc41	0.367458	0.0216001	0.167	0.146	1	1.14384	0
Emc1	0.368351	0.0673243	0.448	0.414	1	1.08213	0
Taf1	0.368471	0.00107783	0.348	0.368	1	0.945652	0
Pycr2	0.368686	0.00080139	0.123	0.138	1	0.891304	0
Ift122	0.368801	0.125808	0.299	0.278	1	1.07554	0
Pdhb	0.369116	0.0246757	0.551	0.572	1	0.963287	0
Adam10	0.369235	0.0920596	0.344	0.325	1	1.05846	0
Klhdc8b	0.3695	0.0279187	0.265	0.235	1	1.12766	0
Reps1	0.36976	0.0341732	0.188	0.163	1	1.15337	0
Pcnx4	0.36978	0.0568267	0.272	0.249	1	1.09237	0
B3galt5	0.369999	0.0491253	0.157	0.14	1	1.12143	0
Rpp21	0.370587	0.0777632	0.346	0.319	1	1.08464	0
Ift46	0.370994	0.0144303	0.21	0.228	1	0.921053	0
Cep44	0.371236	0.0888618	0.182	0.167	1	1.08982	0
Eefsec	0.371362	0.0057836	0.157	0.175	1	0.897143	0
Gpr27	0.371527	0.0449342	0.272	0.249	1	1.09237	0
Eif2s1	0.371562	0.0556649	0.135	0.119	1	1.13445	0
Rnf126	0.373423	0.0890385	0.285	0.263	1	1.08365	0
Ifnar1	0.373503	0.0728209	0.174	0.156	1	1.11538	0
Mbtps1	0.3736	0.0373844	0.299	0.272	1	1.09926	0
Alg6	0.373948	8.12237e-05	0.125	0.142	1	0.880282	0
Glt8d1	0.374472	0.0401713	0.222	0.243	1	0.91358	0
Snx25	0.374769	0.00476428	0.174	0.187	1	0.930481	0
Decr2	0.375064	0.0440602	0.161	0.14	1	1.15	0
Ppig	0.375284	0.00816193	0.661	0.708	1	0.933616	0
H2-D1	0.375403	0.0451935	0.117	0.103	1	1.13592	0
Scamp3	0.375558	0.00598433	0.146	0.163	1	0.895706	0
Frmd4a	0.375696	0.0972871	0.501	0.469	1	1.06823	0
Usp4	0.37581	0.0801071	0.34	0.315	1	1.07937	0
Frmpd3	0.375905	0.0139135	0.4	0.409	1	0.977995	0
Huwe1	0.375997	0.0968982	0.669	0.685	1	0.976642	0
Stt3b	0.376179	0.0717153	0.28	0.257	1	1.08949	0
Dtnb	0.376266	0.00457781	0.145	0.163	1	0.889571	0
1110051M20Rik	0.376515	0.0299324	0.297	0.272	1	1.09191	0
Gnaz	0.376527	0.0188476	0.598	0.646	1	0.925697	0
Nelfe	0.376694	0.00173169	0.192	0.21	1	0.914286	0
Nol10	0.376818	0.00413976	0.089	0.103	1	0.864078	0
Syt13	0.377102	0.018235	0.592	0.621	1	0.953301	0
Vps41	0.377483	0.0120755	0.418	0.44	1	0.95	0
Men1	0.377498	0.0114725	0.153	0.173	1	0.884393	0
Kansl3	0.377933	0.102206	0.428	0.401	1	1.06733	0
Sirt7	0.378551	0.0346182	0.169	0.183	1	0.923497	0
Pla2g12a	0.378674	0.0121028	0.287	0.302	1	0.950331	0
Mib2	0.378866	0.0489243	0.196	0.173	1	1.13295	0
Syp	0.379125	0.03102	0.905	0.924	1	0.979437	0
Sppl2a	0.379213	0.0500964	0.146	0.128	1	1.14062	0
Mrpl32	0.379599	0.0573436	0.282	0.255	1	1.10588	0
Ophn1	0.379936	0.0799436	0.147	0.13	1	1.13077	0
Prkag1	0.38	0.0494143	0.182	0.163	1	1.11656	0
Glyr1	0.380337	0.0167538	0.547	0.595	1	0.919328	0
Tigd2	0.380457	0.0382267	0.35	0.372	1	0.94086	0
Pdia4	0.380642	0.0360923	0.144	0.126	1	1.14286	0
Ccdc174	0.380643	0.0352717	0.386	0.42	1	0.919048	0
Parp1	0.380645	0.0136645	0.162	0.142	1	1.14085	0
Sdc3	0.381024	0.0234665	0.547	0.584	1	0.936644	0
Riok1	0.38178	0.133884	0.334	0.315	1	1.06032	0
Slx1b	0.382432	0.0886247	0.184	0.167	1	1.1018	0
Eif2d	0.382581	0.00455279	0.122	0.136	1	0.897059	0
Myo6	0.38262	0.00788613	0.116	0.13	1	0.892308	0
Mon2	0.382628	0.0900889	0.326	0.307	1	1.06189	0
Pdss1	0.38421	0.010334	0.098	0.113	1	0.867257	0
Mplkip	0.384421	0.0127656	0.14	0.156	1	0.897436	0
Sugp2	0.384634	0.0932996	0.325	0.305	1	1.06557	0
Spast	0.384831	0.0198648	0.339	0.36	1	0.941667	0
Fasn	0.384887	0.0419138	0.349	0.327	1	1.06728	0
N4bp2l2	0.385114	0.0703368	0.453	0.434	1	1.04378	0
Tsc22d2	0.385218	0.00158638	0.206	0.222	1	0.927928	0
Dennd6b	0.385244	0.0916179	0.253	0.233	1	1.08584	0
Nsd1	0.385518	0.0760452	0.492	0.455	1	1.08132	0
Ankrd16	0.385991	0.0654234	0.176	0.158	1	1.11392	0
Scaf4	0.386663	0.0536186	0.106	0.091	1	1.16484	0
Mrpl33	0.386901	0.0651975	0.481	0.461	1	1.04338	0
Zmym5	0.387072	0.108131	0.405	0.385	1	1.05195	0
Snu13	0.38736	0.0637483	0.65	0.658	1	0.987842	0
Gm10073	0.387471	0.0223188	0.227	0.2	1	1.135	0
Brd2	0.387644	0.00609723	0.484	0.496	1	0.975806	0
Hspa13	0.387942	0.0771695	0.44	0.422	1	1.04265	0
Dapk3	0.388615	0.0181733	0.139	0.121	1	1.14876	0
Ube2w	0.388921	0.0608341	0.339	0.319	1	1.0627	0
D930016D06Rik	0.389144	0.0411218	0.215	0.189	1	1.13757	0
Mrpl3	0.389347	0.0369374	0.25	0.224	1	1.11607	0
Mamld1	0.389644	0.0254476	0.118	0.101	1	1.16832	0
Sarm1	0.390383	0.0102778	0.114	0.128	1	0.890625	0
Hrh3	0.39039	0.0651087	0.246	0.224	1	1.09821	0
Igf2r	0.39052	0.0550522	0.18	0.163	1	1.10429	0
Sirt4	0.390605	0.00293	0.095	0.109	1	0.87156	0
Pigp	0.390926	0.073061	0.181	0.165	1	1.09697	0
Tk2	0.391015	0.00437513	0.237	0.257	1	0.922179	0
Hmces	0.391078	0.0309281	0.105	0.121	1	0.867769	0
Akt1s1	0.39108	0.0203686	0.217	0.235	1	0.923404	0
Tfb2m	0.391235	0.0304479	0.133	0.115	1	1.15652	0
Lrp3	0.391555	0.072172	0.321	0.3	1	1.07	0
Ak2	0.39169	0.0120759	0.18	0.193	1	0.932642	0
Abcd4	0.391849	0.0284526	0.151	0.169	1	0.893491	0
Gde1	0.392243	0.0178327	0.457	0.471	1	0.970276	0
Lrrtm2	0.392335	0.0774935	0.359	0.335	1	1.07164	0
C2cd4c	0.392576	0.0241451	0.141	0.123	1	1.14634	0
Sipa1l1	0.392899	0.085965	0.367	0.346	1	1.06069	0
Mthfd2	0.393167	0.00605108	0.095	0.109	1	0.87156	0
Poldip3	0.393167	0.00414643	0.325	0.346	1	0.939306	0
Abhd14b	0.393579	0.134378	0.223	0.206	1	1.08252	0
Pogz	0.39437	0.013187	0.272	0.29	1	0.937931	0
Fam13c	0.394504	0.0152371	0.172	0.187	1	0.919786	0
Usf1	0.394601	0.0360677	0.123	0.107	1	1.14953	0
Dleu7	0.395068	0.00914842	0.168	0.148	1	1.13514	0
Cdc34	0.395312	0.0137177	0.198	0.173	1	1.14451	0
Cmtm4	0.395474	0.0167655	0.36	0.381	1	0.944882	0
Xndc1	0.395498	0.0364983	0.131	0.148	1	0.885135	0
Cpt1c	0.396096	0.0847205	0.241	0.222	1	1.08559	0
Kcnip2	0.396349	0.0514386	0.163	0.146	1	1.11644	0
Elovl4	0.396556	0.0683602	0.375	0.356	1	1.05337	0
Bsn	0.397204	0.0013181	0.355	0.37	1	0.959459	0
Cdkl3	0.39733	0.00156432	0.132	0.146	1	0.90411	0
Gm1673	0.397386	0.0824474	0.812	0.807	1	1.0062	0
Tubb4b	0.397399	0.0429864	0.333	0.311	1	1.07074	0
Mtpap	0.398042	0.0147953	0.111	0.095	1	1.16842	0
Rnf113a2	0.39842	0.0283219	0.131	0.146	1	0.89726	0
Vps35	0.398728	0.00187782	0.441	0.455	1	0.969231	0
Ip6k1	0.398741	0.0268414	0.608	0.665	1	0.914286	0
Atg4c	0.398896	0.0168592	0.148	0.13	1	1.13846	0
Trmt2a	0.398953	0.0711108	0.185	0.167	1	1.10778	0
Ica1	0.399737	0.0603467	0.197	0.177	1	1.11299	0
Usp42	0.399862	0.0257483	0.134	0.119	1	1.12605	0
Mrps2	0.400071	0.00863041	0.141	0.121	1	1.16529	0
Dvl1	0.400485	0.0467033	0.24	0.216	1	1.11111	0
Eed	0.401049	0.0411114	0.109	0.095	1	1.14737	0
Sh3gl3	0.401968	0.0307756	0.378	0.35	1	1.08	0
Alkbh8	0.401981	0.0210818	0.391	0.407	1	0.960688	0
Plekha6	0.402275	0.0101865	0.35	0.362	1	0.966851	0
Stard3nl	0.40267	0.0524581	0.479	0.449	1	1.06682	0
Ncs1	0.403071	0.0728935	0.649	0.673	1	0.964339	0
9330182L06Rik	0.40405	0.0337586	0.244	0.22	1	1.10909	0
Armcx1	0.404392	0.0725543	0.375	0.352	1	1.06534	0
Lrrc45	0.404448	0.124318	0.274	0.255	1	1.07451	0
Rab9b	0.404596	0.039193	0.512	0.496	1	1.03226	0
Sgsm2	0.405183	0.087666	0.387	0.366	1	1.05738	0
Cog4	0.405266	0.0139076	0.153	0.134	1	1.14179	0
Phc2	0.405757	0.013277	0.231	0.253	1	0.913043	0
Plgrkt	0.406002	0.0415159	0.147	0.13	1	1.13077	0
Ankrd54	0.406158	0.0431813	0.155	0.138	1	1.12319	0
Slc35e3	0.406358	0.0621115	0.3	0.278	1	1.07914	0
Nek7	0.406514	0.0238611	0.116	0.101	1	1.14851	0
Robo1	0.406529	0.0179439	0.203	0.181	1	1.12155	0
Tmem38a	0.407078	0.00717208	0.257	0.272	1	0.944853	0
Dtd1	0.407173	0.0302966	0.347	0.321	1	1.081	0
Dpp8	0.407226	0.0444887	0.177	0.154	1	1.14935	0
Ubn2	0.407245	0.112174	0.668	0.654	1	1.02141	0
Map2k2	0.407496	0.0906051	0.431	0.409	1	1.05379	0
Slc35f6	0.408335	0.0485301	0.11	0.097	1	1.13402	0
Cnnm3	0.408804	0.00606116	0.173	0.187	1	0.925134	0
Timm9	0.40895	0.0383499	0.65	0.667	1	0.974513	0
Kmt2e	0.40895	0.0140553	0.645	0.677	1	0.952733	0
Gpr137	0.408994	0.0086996	0.216	0.23	1	0.93913	0
Tbc1d10b	0.409436	0.00300462	0.231	0.208	1	1.11058	0
Med24	0.409494	0.062108	0.114	0.101	1	1.12871	0
Slc12a2	0.409516	0.0807752	0.196	0.177	1	1.10734	0
Gxylt1	0.409962	0.012224	0.089	0.103	1	0.864078	0
Aatk	0.410608	0.0678844	0.61	0.607	1	1.00494	0
Uba3	0.410725	0.054473	0.285	0.259	1	1.10039	0
Rfc2	0.411269	0.0736718	0.237	0.222	1	1.06757	0
Mtfp1	0.411414	0.0499503	0.264	0.247	1	1.06883	0
Mrpl2	0.411461	0.001362	0.107	0.119	1	0.89916	0
Eef2k	0.411472	0.0295118	0.102	0.088	1	1.15909	0
1810022K09Rik	0.412295	0.0508889	0.382	0.409	1	0.933985	0
Zfp513	0.412524	0.0679745	0.11	0.097	1	1.13402	0
Ppp3ca	0.41272	0.0508686	0.839	0.872	1	0.962156	0
Pfn1	0.412857	0.0189651	0.274	0.249	1	1.1004	0
Tmem43	0.412885	0.0539549	0.208	0.191	1	1.08901	0
Lage3	0.413081	0.110945	0.368	0.352	1	1.04545	0
Bcap31	0.413258	0.0499013	0.252	0.228	1	1.10526	0
Herc3	0.413623	0.0428745	0.41	0.391	1	1.04859	0
Dgat1	0.413773	0.0103818	0.14	0.156	1	0.897436	0
Tor1aip2	0.413842	0.0422385	0.248	0.224	1	1.10714	0
Gtf3c1	0.414092	0.000940225	0.254	0.267	1	0.951311	0
Kcnb1	0.414171	0.0365657	0.41	0.374	1	1.09626	0
Cxadr	0.414391	0.0385929	0.133	0.15	1	0.886667	0
Tfpt	0.414537	0.0286804	0.149	0.132	1	1.12879	0
Mast4	0.414987	0.0973495	0.375	0.362	1	1.03591	0
Snx21	0.415164	0.0332365	0.469	0.492	1	0.953252	0
Bbs5	0.415267	0.0547829	0.102	0.088	1	1.15909	0
4932438A13Rik	0.415748	0.0329822	0.489	0.519	1	0.942197	0
Nrg2	0.415794	0.041863	0.111	0.097	1	1.14433	0
Pi4ka	0.416588	0.107025	0.457	0.44	1	1.03864	0
Mt2	0.416611	0.0530408	0.153	0.171	1	0.894737	0
Rcc2	0.416843	0.00269205	0.256	0.274	1	0.934307	0
Scaper	0.41733	0.0381622	0.294	0.265	1	1.10943	0
Atad3a	0.417349	0.0480939	0.173	0.154	1	1.12338	0
Smarcb1	0.417453	0.0309721	0.152	0.134	1	1.13433	0
Slc30a5	0.417599	0.0446592	0.208	0.185	1	1.12432	0
Slc39a6	0.417928	0.0774414	0.401	0.381	1	1.05249	0
Pcdhgc4	0.418309	0.0470969	0.184	0.204	1	0.901961	0
Tmem181a	0.418688	0.105444	0.31	0.288	1	1.07639	0
Snhg12	0.418714	0.039479	0.573	0.626	1	0.915335	0
Qsox2	0.418778	0.0156578	0.133	0.146	1	0.910959	0
Ptprs	0.419536	0.0406765	0.843	0.866	1	0.973441	0
Slc45a1	0.419828	0.0393756	0.209	0.23	1	0.908696	0
Pard6a	0.420591	0.078249	0.153	0.138	1	1.1087	0
Virma	0.421151	0.0170939	0.145	0.128	1	1.13281	0
Mtmr1	0.421261	0.0236442	0.129	0.146	1	0.883562	0
Efcab14	0.421478	0.0517235	0.301	0.28	1	1.075	0
Ccdc28b	0.421665	0.00793835	0.142	0.158	1	0.898734	0
Magee1	0.422143	0.0118915	0.515	0.545	1	0.944954	0
Dgcr6	0.422217	0.0448619	0.384	0.358	1	1.07263	0
Faf1	0.422456	0.0173414	0.164	0.144	1	1.13889	0
Ptpra	0.422506	0.10523	0.438	0.414	1	1.05797	0
Arfgef2	0.422812	0.0534787	0.227	0.21	1	1.08095	0
Ccdc186	0.42321	0.0216816	0.202	0.185	1	1.09189	0
Herc2	0.423546	0.0713658	0.496	0.475	1	1.04421	0
Asb3	0.423919	0.000333523	0.102	0.115	1	0.886957	0
Sh2d5	0.424015	0.0379936	0.223	0.2	1	1.115	0
Snca	0.424294	0.0755678	0.353	0.337	1	1.04748	0
Zdhhc4	0.424692	0.0472691	0.134	0.119	1	1.12605	0
Gpr89	0.424969	0.0387107	0.14	0.123	1	1.13821	0
Tpra1	0.425184	0.0129783	0.169	0.183	1	0.923497	0
Tm9sf3	0.425899	0.00879422	0.576	0.609	1	0.945813	0
Spg7	0.426167	0.0584891	0.135	0.121	1	1.1157	0
Itgb1	0.426284	0.0171143	0.152	0.132	1	1.15152	0
Cep57	0.426787	0.00415412	0.125	0.14	1	0.892857	0
Slain1	0.426859	0.00774242	0.126	0.14	1	0.9	0
Gm17354	0.426926	0.0290497	0.114	0.13	1	0.876923	0
Tmem9b	0.427022	0.078378	0.385	0.374	1	1.02941	0
Ankrd34a	0.428067	0.00130977	0.154	0.171	1	0.900585	0
Tusc3	0.428763	0.0989757	0.442	0.428	1	1.03271	0
Foxred2	0.429875	0.0316507	0.157	0.138	1	1.13768	0
Erc1	0.43012	0.0356528	0.303	0.276	1	1.09783	0
Pip4k2b	0.430654	0.00910488	0.404	0.368	1	1.09783	0
Mpdu1	0.431042	0.0795848	0.181	0.167	1	1.08383	0
Kdm5d	0.431212	0.0799015	0.203	0.185	1	1.0973	0
Dync1h1	0.431392	0.0149292	0.516	0.525	1	0.982857	0
Invs	0.431812	0.0611405	0.127	0.113	1	1.12389	0
Nufip2	0.432047	0.034405	0.303	0.282	1	1.07447	0
Lig3	0.432108	0.0318696	0.118	0.103	1	1.14563	0
Nudt16	0.43243	0.0198873	0.163	0.177	1	0.920904	0
Mid1	0.432482	0.0110513	0.169	0.181	1	0.933702	0
Ranbp2	0.432535	0.0499998	0.21	0.191	1	1.09948	0
Mum1	0.433162	0.0503079	0.185	0.167	1	1.10778	0
Map3k12	0.433458	0.0665005	0.414	0.389	1	1.06427	0
Lars2	0.433581	0.0224838	0.125	0.109	1	1.14679	0
Gm13830	0.43426	0.0273886	0.178	0.195	1	0.912821	0
Vma21	0.434343	0.0073187	0.425	0.449	1	0.946548	0
Fchsd2	0.434452	0.0320237	0.322	0.288	1	1.11806	0
Tmem201	0.434492	0.0323377	0.305	0.321	1	0.950156	0
Rab10os	0.434576	0.0305143	0.225	0.245	1	0.918367	0
Pfas	0.435056	0.0438331	0.227	0.208	1	1.09135	0
Aifm3	0.435259	0.0285772	0.26	0.278	1	0.935252	0
Zim1	0.435993	0.0370998	0.223	0.202	1	1.10396	0
Dnajc16	0.436142	0.0941121	0.309	0.294	1	1.05102	0
Fbxo31	0.436722	0.0297644	0.221	0.202	1	1.09406	0
Prpsap2	0.437353	0.0202069	0.173	0.152	1	1.13816	0
Slc50a1	0.437687	0.111483	0.278	0.259	1	1.07336	0
Ip6k2	0.438083	0.0306652	0.332	0.352	1	0.943182	0
AC165953.2	0.438119	0.0437711	0.205	0.187	1	1.09626	0
Slc25a33	0.438127	0.0287227	0.152	0.134	1	1.13433	0
Gosr1	0.438512	0.00514175	0.168	0.146	1	1.15068	0
Nit1	0.438678	0.0699639	0.25	0.228	1	1.09649	0
Gtpbp2	0.438872	0.0430967	0.371	0.387	1	0.958656	0
Mkl1	0.438951	0.0181621	0.108	0.095	1	1.13684	0
Adgra1	0.439306	0.0210054	0.374	0.377	1	0.992042	0
Arhgdia	0.439579	0.0480747	0.611	0.609	1	1.00328	0
Micall1	0.439741	0.0255655	0.16	0.142	1	1.12676	0
[truncated: 2,057 more rows]
