# Supplementary material for: Esr1-dependent signaling and transcriptional maturation in the medial preoptic area of the hypothalamus shape the development of mating behavior during adolescence
Source: eLife. 2026 Jun 19;14:RP106347. doi: 10.7554/eLife.106347 (PMC13282117; doi:10.7554/eLife.106347)
Supplement: Supplementary file 8. [file elife-106347-supp8.xlsx]

## Sheet: female Branch 1
	p_val	avg_logFC	pct.1	pct.2	p_val_adjust
Fgfr1	2.93718e-16	0.730872	0.603	0.381	4.85692e-12
Sv2c	1.12793e-23	0.496551	0.438	0.138	1.86729e-19
Scg2	7.27321e-39	0.49276	0.997	0.973	1.20452e-34
Pdzrn4	4.44073e-27	0.460947	0.562	0.211	7.35297e-23
Irs4	2.48611e-34	0.433886	0.979	0.821	4.117e-30
Vgf	2.01011e-07	0.427882	0.331	0.19	0.00329316
Pdyn	2.96277e-18	0.424903	0.326	0.093	4.9016e-14
Olfm3	1.51604e-19	0.41802	0.638	0.333	2.5089e-15
Elmo1	4.24565e-18	0.408615	0.628	0.338	7.02359e-14
Socs2	1.41605e-21	0.40466	0.328	0.073	2.3437e-17
Plcb4	8.39343e-20	0.386663	0.703	0.408	1.38911e-15
Kcns2	9.67966e-19	0.38411	0.464	0.188	1.6016e-14
Tmem158	5.04475e-19	0.374713	0.866	0.621	8.34755e-15
Penk	5.88048e-09	0.372756	0.412	0.231	9.66634e-05
Gabre	2.07454e-18	0.370494	0.652	0.354	3.43232e-14
Th	4.22901e-16	0.368545	0.231	0.045	6.99224e-12
Hpcal1	9.36739e-24	0.354893	0.872	0.556	1.55087e-19
Fam46a	7.74171e-13	0.332807	0.453	0.227	1.27839e-08
Tpt1	2.62391e-22	0.330838	0.978	0.909	4.34335e-18
Pgr	1.51453e-13	0.330306	0.59	0.333	2.502e-09
Itm2c	1.2395e-25	0.321675	0.997	0.973	2.05224e-21
Ptprn	2.68084e-10	0.319716	0.881	0.746	4.41427e-06
Iqsec3	2.62994e-14	0.319287	0.564	0.306	4.34624e-10
Enah	5.8747e-08	0.316255	0.812	0.669	0.000963804
Chodl	1.24369e-13	0.312081	0.417	0.184	2.05482e-09
Tmcc3	6.01559e-17	0.311793	0.872	0.619	9.94978e-13
Cartpt	5.7023e-09	0.307581	0.176	0.054	9.37401e-05
AW551984	3.7297e-14	0.307495	0.872	0.664	6.16333e-10
Gm1673	2.84836e-12	0.300338	0.924	0.776	4.70008e-08
Lbhd2	6.64681e-12	0.297655	0.203	0.054	1.09626e-07
Ogfrl1	1.06554e-11	0.294674	0.664	0.42	1.75707e-07
Slc18a2	1.24798e-12	0.293025	0.526	0.272	2.06041e-08
Rap1gap	4.66301e-12	0.290689	0.672	0.431	7.69257e-08
Sccpdh	4.55573e-11	0.290271	0.543	0.315	7.5083e-07
mt-Nd3	2.87017e-19	0.284337	0.981	0.896	4.74956e-15
Ngb	4.78247e-12	0.276308	0.609	0.365	7.88916e-08
Ets2	1.80403e-12	0.274583	0.681	0.415	2.97791e-08
Tmod1	5.04753e-13	0.273618	0.391	0.168	8.33549e-09
Hspa8	8.74251e-17	0.273365	0.988	0.946	1.44584e-12
Dgkb	6.57397e-12	0.270818	0.864	0.667	1.08431e-07
Maged1	1.05703e-11	0.269577	0.922	0.798	1.74314e-07
Sez6l	2.066e-13	0.269112	0.895	0.721	3.41282e-09
Plekhb1	5.95365e-08	0.261607	0.407	0.236	0.000976696
Rasgrf2	1.48e-08	0.260943	0.683	0.51	0.000243089
Thy1	2.49795e-11	0.260786	0.878	0.66	4.11786e-07
Rpl22	1.93479e-11	0.260781	0.907	0.789	3.18969e-07
Kl	2.02603e-12	0.258686	0.203	0.048	3.34397e-08
Maf	2.09364e-13	0.258543	0.259	0.075	3.45828e-09
Saraf	1.38941e-13	0.250642	0.921	0.755	2.29545e-09
Odc1	1.08507e-07	0.250302	0.595	0.417	0.00177875
Eef2	9.06281e-14	0.248892	0.95	0.857	1.49745e-09
Ucp2	4.54831e-11	0.246772	0.329	0.138	7.49652e-07
Prok2	2.31247e-10	0.246714	0.372	0.17	3.8084e-06
Rxfp3	2.17545e-12	0.246196	0.152	0.02	3.59037e-08
Vstm2b	5.78858e-11	0.239522	0.393	0.188	9.53958e-07
Mast4	3.28927e-07	0.237315	0.572	0.381	0.00538354
Zbtb20	1.86754e-09	0.236251	0.955	0.893	3.07172e-05
Nop56	1.00299e-07	0.235443	0.638	0.444	0.0016444
Ptp4a1	2.30653e-08	0.234699	0.75	0.565	0.000378778
Ctxn3	1.16534e-08	0.232783	0.216	0.079	0.000191465
Scd2	9.20839e-08	0.231596	0.834	0.676	0.0015099
Arhgef9	2.05517e-07	0.23088	0.707	0.512	0.00336678
Msi2	4.51868e-09	0.229753	0.588	0.379	7.42962e-05
1110008P14Rik	2.42084e-08	0.22753	0.686	0.492	0.000397501
Clstn3	2.28505e-07	0.223506	0.745	0.562	0.00374245
Rps12	4.00568e-16	0.219205	0.998	0.98	6.62339e-12
Gda	8.03732e-08	0.218147	0.807	0.633	0.00131812
Cacna2d1	1.00165e-09	0.214367	0.517	0.281	1.64831e-05
Htr1b	1.9063e-06	0.209129	0.388	0.238	0.0311318
Id4	9.58747e-08	0.208903	0.679	0.478	0.00157196
Nrip1	6.28434e-10	0.207682	0.226	0.079	1.03453e-05
Polr1d	8.87639e-10	0.207064	0.807	0.608	1.46079e-05
Meg3	1.26296e-15	0.206702	1	1	2.08793e-11
Rplp2	9.38156e-17	0.204947	1	1	1.55143e-12
Prickle2	7.13422e-08	0.202197	0.522	0.342	0.00117015
Rpl7a	4.2913e-12	0.202108	0.991	0.959	7.07978e-08
Klf9	2.08625e-06	0.201843	0.422	0.259	0.0340622
Rps15a	1.38124e-17	0.20118	1	1	2.28485e-13
Srxn1	8.8888e-11	0.19869	0.35	0.152	1.4647e-06
Ppp1r17	1.04108e-08	0.197179	0.219	0.082	0.00017107
Ids	2.30942e-08	0.195326	0.833	0.646	0.00037923
Ssr4	3.77701e-07	0.193327	0.679	0.476	0.00618033
Enpp2	1.8208e-08	0.19261	0.271	0.118	0.000299049
Baiap2	8.95744e-07	0.191747	0.509	0.329	0.0146436
Rpl18	3.59837e-09	0.190965	0.972	0.925	5.9168e-05
Gas7	2.50692e-06	0.190675	0.664	0.494	0.0409179
Hs3st5	2.68669e-09	0.190052	0.366	0.17	4.41827e-05
Fndc9	5.99791e-07	0.189252	0.531	0.338	0.00981079
Reep5	1.64953e-09	0.189204	0.929	0.794	2.71364e-05
Rplp0	1.0135e-07	0.188045	0.957	0.896	0.00166153
Spon1	4.84829e-10	0.18783	0.15	0.032	7.98174e-06
Slitrk6	6.66611e-10	0.187488	0.164	0.041	1.09724e-05
Eef1b2	3.44636e-08	0.185898	0.941	0.841	0.00056572
Npm1	4.73057e-08	0.185406	0.981	0.948	0.000776334
Rpl7	1.36462e-11	0.185227	0.991	0.961	2.24999e-07
mt-Co2	1.95288e-23	0.183694	1	1	3.23279e-19
Parm1	2.65604e-06	0.182076	0.26	0.136	0.0433438
Rack1	1.60732e-07	0.18133	0.862	0.746	0.00263376
Gfra1	1.78104e-07	0.180252	0.429	0.247	0.00291823
Rps20	3.4085e-13	0.18011	0.995	0.991	5.62948e-09
Sema3a	1.46575e-10	0.179505	0.147	0.027	2.41424e-06
mt-Nd2	2.21576e-15	0.176809	0.997	0.998	3.66243e-11
Eef1a1	1.87559e-15	0.176119	1	1	3.10036e-11
B2m	4.35922e-08	0.17548	0.128	0.029	0.000715478
Mgat5	1.26952e-06	0.175374	0.488	0.302	0.0207426
Eif1b	1.86986e-08	0.175183	0.945	0.891	0.000307087
Dbn1	4.2086e-07	0.173181	0.56	0.374	0.00688526
Clmp	5.29993e-08	0.172846	0.414	0.222	0.000869612
Rpl23a	7.19056e-17	0.172108	1	1	1.18925e-12
Cdkl2	2.75766e-08	0.171899	0.574	0.361	0.000452725
Ptpro	2.10329e-07	0.171771	0.705	0.49	0.00344539
Rpl5	1.38437e-07	0.171208	0.971	0.898	0.00226884
Rps6ka6	6.44077e-10	0.170269	0.229	0.077	1.06022e-05
Eno2	2.66678e-06	0.169796	0.881	0.735	0.0435164
Rpl31	4.14242e-12	0.16828	1	0.995	6.83458e-08
Rpl29	3.96754e-10	0.167735	0.998	0.977	6.53255e-06
Mical2	1.39737e-08	0.166546	0.224	0.086	0.000229532
Rps21	6.34649e-15	0.165482	1	0.998	1.04888e-10
H2-Q2	3.88633e-07	0.165102	0.164	0.059	0.00635881
Trp53inp1	8.16017e-10	0.164775	0.181	0.05	1.343e-05
Snrpb	6.05293e-07	0.163886	0.307	0.161	0.00990018
Chst11	6.7531e-09	0.162699	0.293	0.129	0.00011098
Irs2	2.92063e-07	0.161897	0.46	0.274	0.00478166
Idnk	2.93717e-07	0.16179	0.348	0.186	0.00480844
Rpl15	1.30676e-10	0.160841	0.993	0.984	2.1525e-06
Ggct	5.36704e-08	0.160667	0.243	0.104	0.000880571
Rpl36a	1.68245e-09	0.160031	1	0.982	2.76763e-05
Drp2	4.94933e-08	0.159209	0.217	0.086	0.000812185
Rps2	4.50858e-11	0.158886	0.998	0.986	7.43149e-07
Apoc3	6.35273e-09	0.158724	0.321	0.143	0.000104407
Rps9	1.79403e-09	0.15827	1	0.993	2.951e-05
Usp48	3.12841e-07	0.156752	0.367	0.197	0.00512089
Rps13	1.88464e-10	0.156317	0.997	0.989	3.104e-06
Rtraf	5.82258e-07	0.156261	0.878	0.726	0.00952458
Syndig1	7.81019e-10	0.154529	0.14	0.027	1.28548e-05
Rpl34	7.91223e-13	0.154325	1	0.993	1.30647e-08
Trp53inp2	1.20322e-06	0.153674	0.303	0.163	0.0196618
Pik3r3	8.60023e-08	0.15323	0.293	0.136	0.00141027
Ormdl1	4.58269e-08	0.152172	0.219	0.088	0.000752112
mt-Atp6	3.31405e-22	0.15132	1	1	5.48541e-18
Dgkd	1.08472e-06	0.150641	0.307	0.159	0.0177287
Gm16485	9.19298e-11	0.150349	0.183	0.045	1.51473e-06
Dgkz	7.90577e-07	0.14867	0.276	0.141	0.0129275
Rgma	1.12995e-06	0.148022	0.157	0.057	0.0184657
Lpp	7.65544e-09	0.147957	0.231	0.086	0.000125802
Rps10	3.14213e-07	0.147203	0.991	0.975	0.00514304
Znrf2	1.31568e-06	0.147131	0.229	0.107	0.0214942
6330403K07Rik	4.16569e-10	0.145992	0.998	0.998	6.8584e-06
mt-Nd4	4.77511e-13	0.145149	1	1	7.8861e-09
Epb41l4aos	1.50159e-07	0.144007	0.372	0.19	0.0024608
Rpl36	3.04615e-09	0.1406	1	0.995	5.0091e-05
Me1	1.92699e-07	0.136381	0.214	0.088	0.00315718
Rps17	3.52914e-07	0.134731	0.998	0.984	0.00577508
Rps6ka3	1.19488e-08	0.134213	0.121	0.023	0.000196307
Il13ra1	1.98025e-06	0.133248	0.455	0.274	0.0323355
Rps4x	1.51909e-09	0.132452	1	1	2.4992e-05
Ngef	2.95898e-07	0.129405	0.2	0.079	0.00484385
Rpl10a	8.95979e-07	0.128888	0.99	0.977	0.0146466
Chml	5.97671e-08	0.128273	0.159	0.048	0.00098042
Sdhaf4	1.26583e-06	0.127227	0.362	0.2	0.0206836
Rpl39	1.17765e-07	0.126917	0.998	1	0.00193029
Rpl26	1.94312e-12	0.126194	1	1	3.20731e-08
Rpl23	7.97758e-08	0.121928	1	1	0.0013084
Rab40b	3.89986e-07	0.121308	0.169	0.059	0.00638056
Rpl17	1.17065e-10	0.120996	1	1	1.92853e-06
Icam5	2.53142e-07	0.119549	0.147	0.045	0.00414546
Rps24	4.55771e-09	0.118216	1	1	7.49333e-05
Tgfbr1	2.14809e-06	0.116937	0.133	0.043	0.0350697
Rps3	8.13057e-08	0.115819	0.998	1	0.00133333
Rps15	5.26911e-08	0.113261	1	0.998	0.000864608
Fjx1	2.91948e-06	0.112337	0.136	0.045	0.0476371
Rps7	1.26415e-07	0.112155	1	1	0.00207195
Rps18	3.37492e-07	0.112067	1	1	0.0055234
Dhdh	2.52783e-06	0.110038	0.147	0.052	0.0412567
Rpl27a	7.19406e-07	0.108034	1	1	0.0117652
Rps25	9.19329e-07	0.104636	1	0.998	0.0150274
Rps16	2.91854e-07	0.103497	1	0.998	0.00477852
Rps11	6.27297e-07	0.0999125	0.998	1	0.0102594
Rpl24	1.89217e-06	0.099217	1	1	0.0309028
Bid	1.27303e-06	0.0940093	0.166	0.061	0.0207987
Rpl14	7.56784e-07	0.0896855	1	1	0.0123757
Rpl19	2.54337e-06	0.0845224	1	1	0.0415079
Rpl13	1.97215e-06	0.0761645	1	1	0.0322053

## Sheet: female branch2
	p_val	avg_logFC	pct.1	pct.2	p_val_adjust
Nts	7.64244e-61	1.35268	0.671	0.127	1.24801e-56
Dlk1	9.33633e-27	0.846864	0.497	0.147	1.52285e-22
Ecel1	4.95788e-46	0.740879	0.795	0.274	8.09573e-42
Spon1	1.93626e-25	0.65298	0.295	0.032	3.15746e-21
Pdzrn4	4.10469e-42	0.636599	0.714	0.211	6.70173e-38
Spock3	1.56946e-37	0.631109	0.829	0.381	2.5623e-33
Rprm	1.11195e-22	0.606275	0.376	0.093	1.81237e-18
Syt1	2.84505e-19	0.584017	0.87	0.68	4.63174e-15
Vstm2a	5.44609e-31	0.578581	0.78	0.385	8.88801e-27
Pou2f2	1.24762e-26	0.557008	0.775	0.367	2.03487e-22
Tmem35a	1.92422e-29	0.554603	0.621	0.227	3.13976e-25
Cadps2	2.01447e-28	0.540514	0.595	0.19	3.2866e-24
Pbx3	2.10401e-20	0.509718	0.341	0.079	3.42723e-16
Nefl	3.26525e-23	0.505763	0.691	0.34	5.32268e-19
Snap25	1.68085e-28	0.487927	0.986	0.882	2.74248e-24
Glra2	2.20785e-27	0.485822	0.601	0.206	3.60145e-23
Nrp1	1.22738e-32	0.477845	0.442	0.073	2.00333e-28
Drp2	8.95581e-33	0.469128	0.474	0.086	1.46186e-28
Vsnl1	1.43026e-19	0.463391	0.821	0.533	2.3286e-15
Rasgrf1	6.44163e-26	0.4594	0.685	0.29	1.05057e-21
Rph3a	2.13009e-28	0.458009	0.592	0.179	3.47503e-24
Adra2a	5.88317e-30	0.456515	0.373	0.048	9.60075e-26
Aldoc	2.93864e-20	0.445519	0.503	0.19	4.78645e-16
Glra3	1.49308e-23	0.44271	0.509	0.161	2.43402e-19
Snca	1.19846e-16	0.442213	0.616	0.313	1.94929e-12
Lynx1	9.06564e-23	0.433163	0.598	0.236	1.4777e-18
Pcp4	4.03547e-19	0.430566	1	0.971	6.56935e-15
Gabra1	2.80706e-15	0.424588	0.743	0.438	4.56176e-11
Camk4	2.33847e-25	0.41083	0.517	0.154	3.8131e-21
Nell1	6.76614e-25	0.408841	0.711	0.279	1.10322e-20
Pam	1.15533e-16	0.408519	0.743	0.447	1.87937e-12
Cntnap5a	3.27459e-14	0.404006	0.653	0.354	5.31793e-10
Fgf13	2.98825e-21	0.401791	0.607	0.247	4.86816e-17
App	1.35345e-29	0.401723	0.991	0.921	2.20855e-25
Sema6d	4.66201e-28	0.397293	0.428	0.084	7.60514e-24
Hmgcs1	6.88068e-20	0.393094	0.772	0.424	1.12066e-15
Nrip1	1.93417e-21	0.390518	0.358	0.079	3.15135e-17
Gad2	3.44902e-32	0.386655	1	0.927	5.62914e-28
Fgfr1	8.55367e-10	0.386151	0.621	0.381	1.37902e-05
Scd2	1.00717e-19	0.38366	0.925	0.676	1.64018e-15
Iqsec3	7.80945e-17	0.383177	0.633	0.306	1.27052e-12
Rab3c	8.2037e-15	0.379322	0.873	0.649	1.33294e-10
Pak3	1.8717e-25	0.377952	0.988	0.882	3.05237e-21
2900055J20Rik	1.15924e-16	0.3777	0.457	0.179	1.88563e-12
Tenm2	8.45602e-22	0.376726	0.714	0.313	1.37791e-17
Pip4k2a	4.22414e-22	0.375845	0.341	0.066	6.88408e-18
Coch	7.73168e-22	0.371885	0.338	0.063	1.25995e-17
Camk2d	5.14057e-14	0.370406	0.792	0.544	8.34674e-10
Arhgap6	1.28091e-19	0.358806	0.257	0.036	2.08557e-15
Sv2c	2.20091e-17	0.35755	0.422	0.138	3.58132e-13
Scn2b	3.24688e-11	0.350275	0.743	0.512	5.25345e-07
Mef2c	1.36026e-09	0.350176	0.306	0.132	2.19192e-05
Nectin3	1.26565e-19	0.347986	0.361	0.091	2.06087e-15
Mt3	9.01079e-17	0.343734	0.954	0.821	1.46588e-12
Cd83	4.62558e-18	0.340266	0.52	0.202	7.5286e-14
Chl1	3.18959e-16	0.340138	0.884	0.576	5.18532e-12
Sh3gl2	6.55602e-12	0.338841	0.636	0.367	1.06181e-07
Prkcb	1.3469e-16	0.333458	0.656	0.311	2.19046e-12
Ncdn	4.76765e-13	0.332775	0.783	0.519	7.73408e-09
Wnt4	2.28233e-21	0.332545	0.303	0.05	3.71838e-17
Ywhah	2.88694e-24	0.330449	0.994	0.95	4.70657e-20
Vat1l	4.67226e-13	0.328565	0.919	0.748	7.5798e-09
1190002N15Rik	1.18303e-19	0.326113	0.367	0.093	1.92645e-15
Pcdh7	3.73526e-13	0.3235	0.922	0.678	6.06083e-09
Ina	6.54671e-13	0.321283	0.864	0.671	1.06161e-08
Adcy2	2.95338e-16	0.314908	0.399	0.129	4.8016e-12
Eno2	1.53323e-12	0.311805	0.884	0.735	2.48553e-08
Ndufa12	5.12921e-14	0.308479	0.835	0.562	8.32881e-10
Disp2	9.09121e-16	0.307197	0.957	0.76	1.47768e-11
Gm9866	1.5011e-21	0.306481	0.448	0.12	2.4459e-17
AW551984	1.2762e-12	0.303126	0.919	0.664	2.06897e-08
Prkce	7.61595e-12	0.302486	0.751	0.467	1.2334e-07
Vat1	2.08595e-14	0.301636	0.899	0.753	3.38821e-10
Ctxn2	4.61559e-10	0.301256	0.775	0.556	7.44632e-06
Necab1	2.60054e-08	0.301121	0.324	0.15	0.000417152
Klhl1	5.53187e-18	0.300779	0.387	0.113	9.00312e-14
Kcna6	6.72949e-11	0.300386	0.584	0.322	1.08823e-06
Ptprt	1.82507e-17	0.298763	0.272	0.052	2.96994e-13
Pou6f2	1.39725e-11	0.298285	0.159	0.025	2.26243e-07
Cbln2	7.32004e-11	0.297781	0.231	0.068	1.18358e-06
Neo1	1.78377e-11	0.297542	0.494	0.236	2.8881e-07
Vdac1	6.19159e-14	0.293658	0.838	0.574	1.0052e-09
Onecut2	7.51367e-20	0.291035	0.199	0.009	1.22368e-15
Stxbp6	6.39532e-12	0.290032	0.162	0.025	1.03585e-07
Galnt16	3.07889e-10	0.284318	0.789	0.544	4.97117e-06
Auts2	1.02867e-09	0.283781	0.546	0.302	1.65802e-05
Zfhx3	1.2225e-13	0.283368	0.962	0.832	1.98436e-09
Gpr101	1.82433e-07	0.283254	0.35	0.188	0.00291127
Cxxc5	2.13128e-16	0.282406	0.341	0.091	3.46525e-12
Klhl13	4.0549e-13	0.282154	0.428	0.177	6.57908e-09
Ap1s2	1.66184e-08	0.282087	0.72	0.494	0.000266875
Crim1	5.13952e-07	0.279448	0.653	0.458	0.00817698
Fut9	9.27715e-15	0.276916	0.699	0.365	1.50726e-10
Slitrk5	3.31078e-12	0.276132	0.59	0.302	5.3638e-08
Tubb3	3.98809e-10	0.275098	0.809	0.562	6.43638e-06
Arhgef9	5.07005e-13	0.274705	0.821	0.512	8.22413e-09
Zfhx4	1.85219e-10	0.274461	0.775	0.528	2.99147e-06
Chml	1.59635e-17	0.272643	0.269	0.048	2.59789e-13
Atp1b3	4.58545e-11	0.271633	0.711	0.424	7.41696e-07
Gpr83	6.25568e-10	0.271226	0.243	0.079	1.00885e-05
Brinp3	1.24978e-09	0.270182	0.477	0.254	2.01427e-05
Slco3a1	2.11642e-16	0.266909	0.413	0.134	3.44129e-12
Mrap2	6.89898e-07	0.266353	0.457	0.279	0.0109632
Nrcam	2.10385e-14	0.264699	0.613	0.279	3.41707e-10
Ccdc85a	3.29096e-12	0.264269	0.419	0.172	5.33201e-08
Epb41l3	6.35613e-11	0.263827	0.786	0.503	1.02798e-06
Mb21d2	1.58198e-13	0.2625	0.329	0.109	2.56755e-09
Flywch1	8.60838e-12	0.2604	0.864	0.673	1.39404e-07
Col25a1	1.44711e-16	0.259513	0.286	0.061	2.35329e-12
Serpini1	1.14662e-06	0.25871	0.587	0.388	0.0181969
Slitrk1	5.59333e-12	0.258322	0.63	0.324	9.06064e-08
Tpi1	5.77959e-09	0.258043	0.844	0.621	9.29531e-05
Hapln4	5.07266e-15	0.257966	0.422	0.15	8.24307e-11
Gpx3	9.66749e-09	0.257038	0.749	0.51	0.000155357
Syp	4.59535e-12	0.256964	0.962	0.857	7.44446e-08
Tuba4a	3.31642e-09	0.256602	0.682	0.44	5.33711e-05
Dner	4.83879e-10	0.256071	0.769	0.506	7.80594e-06
S100a10	4.8582e-19	0.255115	0.26	0.036	7.90817e-15
Nt5dc3	5.28658e-14	0.254972	0.451	0.179	8.58328e-10
Sncb	2.75643e-08	0.254962	0.789	0.578	0.000442049
Tln2	1.85857e-11	0.253234	0.566	0.283	3.00903e-07
Rgmb	5.46408e-11	0.253215	0.526	0.268	8.8376e-07
Srxn1	1.0185e-14	0.253158	0.425	0.152	1.65455e-10
Lhfpl3	2.50607e-12	0.253072	0.35	0.127	4.06133e-08
Akap7	3.17322e-12	0.252366	0.578	0.281	5.14188e-08
Susd4	3.95555e-08	0.252141	0.671	0.431	0.000633798
Ube2ql1	2.63348e-11	0.252083	0.543	0.263	4.26228e-07
Tle4	9.58226e-09	0.251864	0.526	0.306	0.000153997
Ndrg4	5.26874e-13	0.25148	0.971	0.923	8.5459e-09
Gabra2	7.72717e-09	0.250594	0.769	0.567	0.000124222
Apba2	3.82405e-11	0.249423	0.509	0.249	6.18617e-07
Ngb	1.06101e-11	0.248873	0.665	0.365	1.71809e-07
Hspa4l	1.68349e-09	0.248624	0.844	0.596	2.71211e-05
Ly6e	1.98903e-08	0.247144	0.725	0.447	0.000319318
Spock2	1.02274e-10	0.245506	0.96	0.769	1.65315e-06
Utrn	3.44746e-18	0.245088	0.251	0.036	5.61143e-14
Unc5d	3.09807e-11	0.244579	0.876	0.633	5.0133e-07
Tac2	2.52741e-08	0.244411	0.147	0.036	0.000405498
Ptprg	6.5983e-10	0.238707	0.584	0.322	1.06404e-05
Bhlhe41	3.88554e-10	0.238655	0.494	0.256	6.27126e-06
Nxph1	5.40066e-16	0.238342	0.257	0.05	8.77877e-12
Tuba1b	2.33003e-09	0.238173	0.934	0.828	3.75204e-05
Slc32a1	6.90676e-09	0.237603	0.861	0.644	0.000111061
Ids	4.50631e-10	0.236443	0.867	0.646	7.27048e-06
Gabrg1	2.33611e-09	0.236011	0.627	0.379	3.7616e-05
Tubb5	4.10219e-10	0.23585	0.942	0.787	6.62011e-06
Cox5a	3.6678e-09	0.235269	0.685	0.433	5.90185e-05
Lrrfip2	5.62331e-13	0.235238	0.405	0.154	9.12044e-09
Faim2	3.71249e-11	0.234859	0.968	0.855	6.00606e-07
Lsamp	1.78284e-12	0.234796	0.977	0.88	2.8898e-08
Opn3	1.43819e-14	0.23384	0.179	0.02	2.33619e-10
Snx10	2.24271e-09	0.233349	0.665	0.399	3.61188e-05
Enah	1.72277e-09	0.232759	0.873	0.669	2.77521e-05
Arhgap36	1.71559e-07	0.232109	0.52	0.304	0.00273825
Nat8l	9.93325e-10	0.23139	0.627	0.356	1.60114e-05
Dnm3	2.12101e-10	0.230691	0.841	0.617	3.42543e-06
1110008P14Rik	1.94215e-07	0.229597	0.705	0.492	0.00309889
Nsg1	3.18374e-11	0.228206	0.98	0.873	5.1516e-07
Cntnap4	3.30888e-09	0.228182	0.506	0.265	5.32531e-05
Robo1	9.71876e-11	0.227947	0.448	0.206	1.57113e-06
Snap91	7.71524e-09	0.227352	0.864	0.655	0.000124038
Phyhipl	1.1647e-08	0.226914	0.607	0.349	0.000187097
Tenm4	5.57978e-10	0.225426	0.61	0.34	8.99908e-06
Syt17	1.48221e-16	0.22475	0.251	0.043	2.41022e-12
Nrsn1	4.09733e-13	0.223432	0.997	0.939	6.6475e-09
Dpp6	1.3943e-10	0.222728	0.876	0.642	2.2529e-06
Lbhd2	1.25007e-13	0.22156	0.243	0.054	2.02899e-09
Tspan33	1.06759e-12	0.221522	0.419	0.163	1.73088e-08
Rspo1	2.77087e-13	0.221246	0.309	0.093	4.49656e-09
Eps15	3.26908e-10	0.220883	0.566	0.288	5.2776e-06
Rtn3	1.97422e-12	0.220833	0.997	0.952	3.19982e-08
Cadps	4.01196e-08	0.21968	0.853	0.624	0.000642756
Tspyl4	1.61265e-10	0.218929	0.948	0.859	2.60492e-06
Prkca	4.48462e-09	0.21746	0.283	0.113	7.2144e-05
Fgf12	7.96958e-08	0.217203	0.512	0.295	0.00127457
Got1	2.88095e-09	0.216953	0.659	0.385	4.63718e-05
Ubl3	1.00509e-08	0.21688	0.746	0.483	0.000161508
Rbfox3	5.21749e-09	0.216702	0.827	0.603	8.39182e-05
Ghitm	8.00289e-08	0.216415	0.734	0.488	0.00127982
Cntnap1	6.3914e-12	0.21552	0.382	0.15	1.03528e-07
Dhcr24	3.00527e-11	0.215283	0.393	0.163	4.86343e-07
Rgs8	4.5898e-14	0.214073	0.269	0.066	7.45338e-10
Ppp1r17	1.34059e-09	0.213762	0.246	0.082	2.16036e-05
Cacng4	6.66491e-09	0.213538	0.592	0.338	0.000107178
Idi1	1.98678e-11	0.212737	0.355	0.136	3.21619e-07
Kcnip1	1.42519e-08	0.212718	0.514	0.283	0.0002289
Cbarp	3.55058e-10	0.212437	0.994	0.946	5.73135e-06
Hspa5	5.47297e-07	0.212379	0.694	0.447	0.00870641
Elavl2	4.78613e-08	0.211462	0.76	0.492	0.000766355
Ddhd1	2.41585e-07	0.210737	0.425	0.231	0.00385182
Vamp1	7.71176e-10	0.210632	0.329	0.132	1.24352e-05
Maged1	4.24839e-08	0.210615	0.925	0.798	0.000680422
Map4	1.54454e-07	0.210552	0.858	0.673	0.00246556
Chchd10	4.5986e-07	0.210406	0.838	0.619	0.00731822
Ankrd46	6.19314e-09	0.210261	0.691	0.413	9.9598e-05
Pgam1	3.10066e-06	0.210162	0.841	0.717	0.0489719
Camk2n1	1.08066e-06	0.209379	0.829	0.642	0.0171556
Amotl1	2.50615e-08	0.208602	0.598	0.345	0.000402112
Stard4	7.76033e-13	0.20761	0.292	0.086	1.25826e-08
Pkm	3.67945e-08	0.207476	0.954	0.807	0.000589632
Calb2	4.17136e-07	0.207463	0.529	0.315	0.00663956
Mafa	5.92177e-07	0.206695	0.185	0.066	0.00941798
Endod1	1.02943e-08	0.204359	0.523	0.281	0.000165399
Adcyap1r1	2.61556e-08	0.203222	0.714	0.422	0.000419535
Dzank1	7.6569e-08	0.202323	0.87	0.68	0.00122464
Otub1	2.59516e-06	0.202221	0.746	0.524	0.0410373
Pfkp	6.92185e-09	0.200539	0.488	0.254	0.000111296
Insig1	2.09809e-07	0.200527	0.393	0.206	0.00334729
Fdft1	1.91684e-09	0.200068	0.436	0.204	3.08746e-05
Higd1a	2.30114e-09	0.198097	0.621	0.338	3.70576e-05
Trhr	2.21004e-11	0.196393	0.286	0.093	3.5774e-07
Kcnc4	7.99654e-10	0.196384	0.405	0.181	1.28928e-05
Trim2	2.52888e-07	0.194296	0.879	0.701	0.00403154
Plcl1	6.29181e-13	0.194151	0.254	0.063	1.02034e-08
Ptpro	2.10978e-08	0.194088	0.775	0.49	0.000338641
Syngr1	4.5258e-07	0.193987	0.916	0.707	0.00720281
2010005H15Rik	2.48264e-08	0.193028	0.451	0.229	0.000398364
Uchl1	4.85712e-07	0.192935	0.916	0.771	0.00772914
Slc24a3	1.37675e-07	0.192865	0.462	0.249	0.00219813
Lypd6	2.22857e-06	0.192411	0.425	0.238	0.0352782
Rnf152	1.42366e-09	0.191976	0.231	0.073	2.2938e-05
Rps6ka6	1.76442e-12	0.191858	0.277	0.077	2.86013e-08
Syt4	3.00738e-07	0.191703	0.977	0.9	0.00479196
Ak1	1.00722e-07	0.191687	0.564	0.322	0.00160984
Cdc123	1.14088e-08	0.190104	0.483	0.243	0.000183282
mt-Nd3	2.57666e-08	0.189328	0.965	0.896	0.000413347
Tecr	6.3775e-07	0.189241	0.882	0.698	0.0101409
Msmo1	7.12508e-08	0.189141	0.512	0.283	0.00113973
Scn8a	3.1514e-08	0.188841	0.5	0.265	0.000505232
Ublcp1	8.00217e-09	0.188698	0.335	0.15	0.000128635
Actr1b	2.4506e-07	0.188593	0.679	0.435	0.00390698
Cdh4	7.51793e-13	0.18851	0.194	0.034	1.21903e-08
Chn1	1.102e-06	0.187968	0.731	0.485	0.017492
Brinp2	8.90247e-09	0.187698	0.529	0.274	0.000143089
Cycs	6.80719e-07	0.186837	0.737	0.492	0.0108193
Cox8a	3.76839e-10	0.186655	1	0.986	6.08255e-06
Ache	1.19943e-10	0.186468	0.514	0.243	1.93827e-06
Psap	3.54665e-07	0.185873	0.948	0.848	0.00564732
Arhgap32	5.98271e-08	0.185565	0.555	0.313	0.000957533
Camta1	9.61555e-10	0.185407	0.986	0.914	1.55003e-05
Cltb	3.34323e-07	0.185268	0.887	0.701	0.00532543
Tmem47	6.474e-07	0.184926	0.543	0.327	0.0102937
Tsc22d1	5.18788e-07	0.184377	0.916	0.73	0.00825339
Maob	2.93851e-10	0.183693	0.185	0.043	4.74481e-06
Tmem9b	1.78353e-08	0.183573	0.468	0.243	0.000286363
Cplx1	1.46294e-06	0.183271	0.373	0.197	0.0231979
Cnksr2	2.40665e-10	0.18282	0.289	0.1	3.88649e-06
Slc25a12	2.89423e-07	0.181635	0.601	0.356	0.00461196
Cadm1	1.42397e-06	0.181626	0.974	0.891	0.0225813
Sema3a	3.27823e-12	0.180952	0.173	0.027	5.31172e-08
Dock4	2.86737e-11	0.180844	0.324	0.113	4.64056e-07
Pde11a	2.43512e-09	0.180386	0.214	0.066	3.92031e-05
Ptpn5	6.89685e-07	0.180214	0.688	0.431	0.0109612
Atp1b1	7.1667e-09	0.179981	0.991	0.964	0.000115226
Srebf2	3.8847e-09	0.179974	0.697	0.39	6.25009e-05
Limk1	4.90184e-10	0.179591	0.439	0.195	7.90716e-06
Csmd2	9.20587e-10	0.179244	0.425	0.193	1.48408e-05
Rims2	2.82046e-07	0.177407	0.705	0.463	0.00449468
Smim1	1.0626e-08	0.177015	0.35	0.156	0.000170718
Lamp5	7.82176e-10	0.177003	0.246	0.079	1.26118e-05
Rap1gap	1.93767e-06	0.176414	0.673	0.431	0.0306869
Me1	3.0917e-10	0.176268	0.266	0.088	4.99155e-06
Pde4b	2.98113e-08	0.176188	0.324	0.143	0.000477964
Kif5c	1.13084e-06	0.175893	0.873	0.664	0.0179476
Gstm7	1.48911e-07	0.175252	0.321	0.145	0.00237736
Camk2n2	2.24712e-06	0.175076	0.841	0.612	0.0355697
Cpeb1	6.61402e-11	0.175001	0.289	0.095	1.06962e-06
Tmem150c	2.55362e-11	0.174524	0.37	0.138	4.13329e-07
Pappa	1.00113e-10	0.173629	0.153	0.025	1.61832e-06
Tsr2	2.53837e-07	0.173502	0.639	0.392	0.00404641
Nt5c3	8.45224e-08	0.173315	0.428	0.218	0.00135151
Stx1b	2.56096e-06	0.173142	0.806	0.594	0.0405067
Zfhx2	2.49349e-06	0.172772	0.54	0.331	0.0394471
Dnajc5	9.95754e-07	0.172686	0.965	0.866	0.0158156
Clstn3	1.086e-06	0.172278	0.795	0.562	0.0172391
Spred1	4.29717e-08	0.17223	0.621	0.356	0.000688191
H2-Q2	2.21561e-07	0.172018	0.179	0.059	0.00353391
Tcf25	6.79972e-08	0.171872	0.951	0.846	0.00108796
Eef1b2	1.04632e-06	0.171558	0.948	0.841	0.0166124
Actg1	4.22746e-08	0.17119	0.977	0.912	0.000677113
Hprt	1.90984e-06	0.171139	0.777	0.515	0.0302575
Sema3c	1.67429e-08	0.171097	0.116	0.018	0.000268858
Il1rap	7.0992e-08	0.170906	0.364	0.17	0.00113566
Lgi3	1.42666e-09	0.170585	0.329	0.132	2.29849e-05
Sdc2	1.83101e-08	0.169889	0.402	0.186	0.000293969
Nefm	5.29892e-10	0.169755	0.26	0.088	8.54663e-06
Map2k7	2.36796e-07	0.169701	0.54	0.299	0.00377619
Large1	9.34967e-08	0.169685	0.448	0.24	0.00149455
Tuba1a	1.31863e-06	0.167976	0.931	0.78	0.0209174
Magi1	1.81237e-06	0.167938	0.653	0.426	0.0287169
Tspan17	6.17923e-08	0.166743	0.428	0.213	0.000988862
Tmem132a	3.16321e-08	0.166142	0.347	0.156	0.000507094
Calr	2.61545e-06	0.166016	0.882	0.696	0.0413555
Capza1	7.9559e-07	0.1656	0.578	0.34	0.0126395
Sqle	1.30448e-08	0.16464	0.332	0.141	0.000209526
Abca2	1.21687e-06	0.163629	0.607	0.367	0.0193092
Map1lc3b	2.31887e-06	0.162984	0.699	0.46	0.0366984
Pigk	2.37261e-06	0.162882	0.532	0.313	0.0375442
As3mt	4.15613e-10	0.162838	0.306	0.109	6.70675e-06
Cpne6	3.29871e-08	0.162324	0.353	0.159	0.00052875
Epha10	3.38747e-08	0.16219	0.237	0.088	0.00054291
Ptprm	2.86062e-09	0.161762	0.243	0.082	4.60474e-05
Slc25a1	8.47607e-09	0.16176	0.436	0.204	0.000136244
Robo2	2.08246e-08	0.161617	0.275	0.109	0.000334276
Syndig1	4.16602e-11	0.161582	0.162	0.027	6.73895e-07
Arpp21	2.36551e-09	0.16133	0.254	0.086	3.8087e-05
Miat	2.5739e-07	0.160655	0.63	0.381	0.00410254
Xpo6	2.66126e-07	0.160559	0.436	0.234	0.00424126
Srpr	3.16777e-07	0.160441	0.468	0.247	0.00504658
Zwint	2.36392e-08	0.159939	1	0.984	0.000379339
Scml4	2.40823e-09	0.159732	0.292	0.109	3.87725e-05
Rgs7	5.32385e-08	0.15969	0.376	0.179	0.000852295
Ctnnd2	2.17168e-07	0.159609	0.633	0.383	0.00346427
Dync1i1	6.68702e-08	0.159324	0.587	0.331	0.00106999
Grid2	8.63073e-07	0.159208	0.555	0.34	0.0137099
Aifm3	3.9514e-09	0.159178	0.315	0.127	6.35701e-05
Cdk16	7.09302e-08	0.15895	0.41	0.2	0.00113474
Ube2j1	3.95313e-07	0.158823	0.645	0.374	0.00629377
Ephb1	5.06868e-07	0.158587	0.434	0.229	0.00806528
Slit2	4.22511e-08	0.158457	0.301	0.127	0.000676778
Fam196a	2.73876e-12	0.157751	0.173	0.027	4.43816e-08
Islr2	1.25842e-09	0.157718	0.277	0.098	2.02806e-05
Acly	6.73349e-07	0.157231	0.592	0.354	0.0107029
Tpd52	1.93048e-06	0.157134	0.491	0.277	0.0305769
Cdk2ap1	3.50461e-09	0.157129	0.254	0.088	5.63961e-05
Cdh2	1.06876e-06	0.156129	0.777	0.571	0.0169676
Sdf2l1	1.89547e-09	0.1559	0.211	0.061	3.05323e-05
Pfn2	1.69112e-06	0.155579	0.948	0.807	0.0268059
Ppia	1.81687e-06	0.155495	0.974	0.884	0.0287864
Pcsk1n	1.36205e-07	0.15521	1	0.955	0.00217506
B3galt1	2.6366e-07	0.154764	0.402	0.202	0.00420221
Aldh9a1	1.79591e-07	0.152257	0.231	0.088	0.00286609
Trim32	2.84028e-06	0.152135	0.714	0.456	0.044885
Hrasls	1.77331e-10	0.152081	0.321	0.116	2.86424e-06
Ryr2	4.80951e-08	0.151289	0.376	0.175	0.000770051
Ube2e2	1.65235e-07	0.151208	0.558	0.302	0.00263748
Kctd12	4.12192e-07	0.150827	0.191	0.068	0.00656169
Sgcb	6.04964e-07	0.150789	0.393	0.2	0.00962074
Clstn2	1.10571e-07	0.150491	0.249	0.1	0.00176682
Dtd1	2.62979e-06	0.15002	0.543	0.324	0.0415796
Phactr2	3.95175e-08	0.149565	0.269	0.104	0.000633229
Itm2c	2.12059e-07	0.148641	0.994	0.973	0.00338297
Grik1	1.23729e-06	0.148288	0.327	0.161	0.019632
Lsm11	9.61849e-11	0.147984	0.231	0.063	1.55502e-06
Ddc	1.31968e-06	0.147945	0.26	0.116	0.0209328
Htr7	2.19077e-13	0.146308	0.176	0.023	3.5554e-09
B3glct	5.05268e-10	0.146062	0.147	0.025	8.14997e-06
Ogfrl1	2.58004e-06	0.145776	0.665	0.42	0.0408059
Kcnd2	2.79913e-06	0.145402	0.569	0.347	0.0442431
Chn2	4.15028e-07	0.145173	0.228	0.091	0.00660641
Rap1gds1	3.455e-07	0.144804	0.65	0.379	0.00550208
Adipor1	9.20006e-09	0.144781	0.425	0.193	0.000147863
B4gat1	6.71209e-07	0.144588	0.451	0.234	0.0106695
Ass1	5.15388e-08	0.143513	0.263	0.102	0.000825136
Fam168b	2.37682e-07	0.143211	0.702	0.429	0.00379008
Diras2	5.5129e-07	0.143172	0.237	0.095	0.00876937
Arnt2	1.72341e-06	0.14295	0.462	0.259	0.0273143
Krt222	1.40642e-09	0.142923	0.257	0.086	2.26617e-05
Calm1	6.83266e-08	0.141619	1	0.977	0.00109316
Apoc3	7.81723e-07	0.141516	0.309	0.143	0.01242
Ikzf2	3.30429e-07	0.140993	0.179	0.059	0.00526373
Ppp4r4	5.46421e-08	0.140612	0.214	0.075	0.000874656
Map1b	2.41378e-07	0.140345	1	0.973	0.00384877
Chst2	5.851e-07	0.139787	0.223	0.088	0.00930602
Gpr158	2.24791e-08	0.139567	0.361	0.161	0.000360766
Trp53inp2	9.99541e-07	0.139428	0.332	0.163	0.0158747
Ppm1f	3.40811e-07	0.138722	0.358	0.172	0.00542776
Stmn4	2.85528e-06	0.138136	0.575	0.358	0.0451191
Serpina3n	1.53932e-10	0.13743	0.147	0.023	2.48678e-06
Cstf2	1.95128e-06	0.137242	0.564	0.324	0.0309004
Sccpdh	2.8657e-08	0.13689	0.584	0.315	0.000459515
Npbwr1	2.88067e-06	0.136361	0.153	0.052	0.0455145
Rps6ka3	1.98551e-09	0.136219	0.136	0.023	3.19787e-05
Mafb	5.19778e-09	0.135807	0.121	0.018	8.36064e-05
Pou2f1	1.03531e-06	0.135499	0.298	0.138	0.0164387
Nhs	1.04129e-07	0.135289	0.283	0.116	0.00166408
Jund	1.37901e-06	0.135201	0.532	0.299	0.0218711
Dgkd	1.9172e-06	0.134805	0.327	0.159	0.0303723
Fbxl19	3.53522e-07	0.134543	0.295	0.129	0.00562949
Elovl4	1.80613e-06	0.134081	0.54	0.302	0.0286199
Mir124-2hg	3.34383e-07	0.133427	0.37	0.177	0.00532606
Arih1	1.25785e-06	0.133145	0.439	0.234	0.0199546
Grin2a	3.60155e-08	0.132471	0.22	0.075	0.000577185
Mcfd2	2.82909e-06	0.131835	0.543	0.331	0.0447109
Ywhab	2.303e-06	0.130688	0.997	0.971	0.0364518
Tmtc4	2.82464e-06	0.130543	0.249	0.111	0.0446434
Caml	6.66628e-07	0.129157	0.283	0.127	0.0105981
Gucy1a1	4.35112e-10	0.128847	0.251	0.077	7.02054e-06
Gm26782	2.71699e-06	0.128134	0.494	0.274	0.0429475
Hmgxb3	1.98502e-07	0.127869	0.182	0.059	0.00316711
St8sia6	1.40273e-10	0.127717	0.121	0.011	2.26626e-06
Cdh6	1.47592e-06	0.127455	0.185	0.068	0.0234022
Uba3	1.65159e-06	0.127406	0.457	0.243	0.0261827
Ywhag	1.5131e-06	0.126922	0.991	0.98	0.0239902
Cacnb2	2.54239e-07	0.126765	0.249	0.1	0.00405256
Snx7	4.64806e-09	0.126683	0.171	0.041	7.47687e-05
Nkain3	2.56445e-08	0.125772	0.194	0.059	0.000411415
Slitrk4	1.15071e-07	0.125397	0.376	0.175	0.00183815
Rab15	1.25457e-06	0.125296	0.598	0.358	0.0199038
BC030500	6.89742e-07	0.124703	0.428	0.22	0.0109614
Ezr	7.27708e-08	0.124542	0.15	0.039	0.00116397
Rnf128	6.65665e-07	0.124092	0.194	0.07	0.0105834
Gm16485	1.36477e-07	0.122663	0.159	0.045	0.00217926
Klf6	1.70503e-06	0.122094	0.309	0.145	0.0270247
Gsg1l	4.24565e-10	0.122055	0.145	0.023	6.85078e-06
Wscd1	1.92588e-06	0.121542	0.214	0.086	0.030506
Pcdh18	1.00739e-07	0.121181	0.173	0.052	0.00161001
Ranbp9	3.04446e-07	0.120775	0.367	0.172	0.00485073
Spats2l	7.21061e-07	0.119471	0.173	0.059	0.0114569
Diaph3	1.08359e-07	0.119071	0.165	0.048	0.00173158
Elovl5	3.08641e-06	0.118987	0.251	0.111	0.0487498
Trbc2	1.10603e-07	0.118349	0.194	0.063	0.00176721
Mical2	1.11912e-07	0.117999	0.234	0.086	0.00178802
Slit1	6.21824e-08	0.117693	0.168	0.048	0.000995043
Zfp385b	2.20827e-07	0.116389	0.251	0.1	0.00352242
Tmtc2	2.48816e-09	0.115625	0.173	0.041	4.00544e-05
Tfrc	1.35789e-07	0.115587	0.312	0.134	0.00216854
Sstr1	1.17825e-10	0.115572	0.104	0.005	1.90428e-06
Mtcl1	3.70718e-07	0.115348	0.24	0.095	0.00590257
Tdrp	1.71599e-07	0.113858	0.223	0.082	0.00273871
Rnf114	2.58922e-06	0.113047	0.376	0.19	0.0409459
Slc38a10	2.50387e-06	0.112302	0.277	0.127	0.0396088
Pcbp3	2.15436e-06	0.111595	0.283	0.129	0.0341057
Ptn	1.19025e-06	0.111478	0.387	0.193	0.0188881
mt-Co2	3.24873e-09	0.110901	1	1	5.22884e-05
Cep83	1.50589e-07	0.110724	0.217	0.077	0.002404
Baalc	2.65737e-06	0.110366	0.422	0.222	0.0420076
Snx19	1.00898e-06	0.109821	0.277	0.122	0.0160226
Myo16	9.20373e-08	0.108757	0.153	0.041	0.00147131
Plpp7	1.29963e-08	0.107049	0.147	0.032	0.00020876
Pim3	6.68948e-07	0.106986	0.231	0.091	0.0106343
Doc2b	2.29486e-07	0.105861	0.309	0.134	0.00365985
Chrm2	1.92012e-06	0.105346	0.139	0.041	0.0304167
Pip5k1b	2.28767e-08	0.103691	0.13	0.025	0.000367126
Eif1ad	2.01582e-06	0.102566	0.28	0.125	0.0319185
Plekha5	3.06152e-06	0.101434	0.26	0.116	0.0483597
Fkbp1b	9.55699e-07	0.10124	0.231	0.093	0.0151803
Kcnn2	1.24534e-07	0.100722	0.136	0.032	0.00198906
3110021N24Rik	2.63446e-06	0.0999823	0.176	0.063	0.0416508
Coro6	4.08147e-08	0.0998234	0.173	0.048	0.000653851
Ggct	1.93451e-06	0.0996453	0.246	0.104	0.0306387
4930452B06Rik	2.6652e-08	0.0992954	0.133	0.027	0.000427471
Ulk1	2.38379e-06	0.0990277	0.376	0.193	0.0377164
Nr2f6	2.54753e-06	0.0987308	0.179	0.066	0.0402968
Apeh	2.07513e-06	0.0974553	0.171	0.059	0.0328534
Gng12	1.12443e-06	0.0957396	0.124	0.032	0.017847
Tlnrd1	3.15304e-06	0.0948983	0.231	0.098	0.0497959
Car11	2.35682e-06	0.0905968	0.251	0.107	0.0372967
Aard	4.59988e-08	0.0893083	0.15	0.036	0.000736625
Dusp6	4.30573e-07	0.0887366	0.107	0.02	0.00685299
Pyurf	1.37696e-06	0.0870196	0.197	0.073	0.02184
Tyms	2.89065e-06	0.0834894	0.142	0.043	0.0456694
Msra	1.3976e-06	0.0792748	0.142	0.041	0.0221646
Lifr	1.9999e-06	0.0739601	0.104	0.023	0.0316684

## Sheet: female late trajectory
genes	p_val	avg_logFC	pct.1	pct.2	p_val_adjust	type
Nts	4.85522e-22	0.768037	0.37	0.127	8.2762e-18	shared
Fgfr1	8.78625e-17	0.615518	0.61	0.381	1.49674e-12	other
Pdzrn4	9.19918e-40	0.530239	0.619	0.211	1.56837e-35	shared
Sv2c	8.07998e-25	0.446846	0.432	0.138	1.37739e-20	shared
Vgf	3.00309e-08	0.440893	0.332	0.19	0.000508363	female specific
Penk	5.90414e-09	0.404757	0.392	0.231	0.000100081	female specific
Tmem35a	4.08186e-16	0.394502	0.45	0.227	6.95305e-12	shared
Spon1	5.01275e-17	0.387742	0.204	0.032	8.53971e-13	other
Ecel1	2.61803e-19	0.381136	0.545	0.274	4.46192e-15	shared
Iqsec3	7.17664e-19	0.343639	0.59	0.306	1.22304e-14	other
Scg2	3.60375e-18	0.335459	0.996	0.973	6.14044e-14	female specific
Elmo1	8.1564e-14	0.328578	0.575	0.338	1.38838e-09	shared
Olfm3	1.76685e-14	0.323584	0.579	0.333	3.00842e-10	other
AW551984	2.87295e-17	0.305865	0.89	0.664	4.89493e-13	other
Spock3	1.9579e-11	0.291312	0.594	0.381	3.32784e-07	other
Scd2	4.01096e-15	0.291153	0.868	0.676	6.83146e-11	shared
Dlk1	9.98087e-06	0.288036	0.255	0.147	0.16715	other
Drp2	8.47723e-19	0.286504	0.313	0.086	1.4446e-14	shared
Enah	8.66937e-11	0.285867	0.835	0.669	1.47258e-06	other
Nrip1	4.30217e-16	0.279966	0.275	0.079	7.32788e-12	shared
Kcns2	3.21607e-13	0.277978	0.4	0.188	5.47344e-09	other
Socs2	4.72736e-15	0.277198	0.26	0.073	8.05117e-11	shared
Plcb4	5.36805e-13	0.276419	0.639	0.408	9.1348e-09	other
Pdyn	2.55891e-10	0.272539	0.241	0.093	4.34426e-06	female specific
Gabre	7.95913e-14	0.27082	0.604	0.354	1.35488e-09	female specific
Lbhd2	4.47968e-14	0.269895	0.218	0.054	7.62665e-10	female specific
Tpt1	3.06596e-17	0.268848	0.975	0.909	5.22347e-13	shared
Ngb	9.09587e-15	0.266145	0.63	0.365	1.54903e-10	other
Pgr	1.90292e-12	0.262747	0.575	0.333	3.23688e-08	shared
Rprm	1.2555e-07	0.261332	0.206	0.093	0.00212242	female specific
Itm2c	1.10735e-21	0.26047	0.996	0.973	1.88738e-17	shared
Pcp4	1.71367e-11	0.25879	0.994	0.971	2.9129e-07	shared
Irs4	4.60417e-13	0.251023	0.925	0.821	7.83537e-09	shared
mt-Nd3	2.7533e-18	0.249884	0.975	0.896	4.69163e-14	shared
Rap1gap	6.6695e-12	0.249503	0.673	0.431	1.13408e-07	other
Maged1	6.49817e-13	0.24795	0.923	0.798	1.10573e-08	shared
Arhgef9	7.1382e-12	0.247481	0.749	0.512	1.21371e-07	other
Thy1	3.5527e-11	0.245639	0.86	0.66	6.03711e-07	shared
Ptprn	9.65572e-09	0.244459	0.886	0.746	0.000163616	female specific
Nrp1	2.8741e-14	0.243383	0.249	0.073	4.89344e-10	other
Ogfrl1	1.44599e-11	0.241598	0.664	0.42	2.45803e-07	shared
Prkce	3.1467e-09	0.239209	0.661	0.467	5.33554e-05	shared
Aldoc	6.96747e-11	0.238933	0.378	0.19	1.18363e-06	shared
Pak3	9.4187e-15	0.236975	0.971	0.882	1.60391e-10	shared
Nefl	3.62058e-09	0.236927	0.523	0.34	6.13762e-05	other
Sccpdh	4.04725e-12	0.235676	0.558	0.315	6.88235e-08	shared
Atp1b3	1.25979e-09	0.230926	0.637	0.424	2.13735e-05	other
Gm1673	1.73474e-09	0.230476	0.908	0.776	2.94264e-05	female specific
1110008P14Rik	6.31365e-10	0.228303	0.693	0.492	1.07162e-05	shared
Hmgcs1	7.45365e-11	0.227388	0.648	0.424	1.26615e-06	shared
Eno2	8.91875e-11	0.225245	0.882	0.735	1.51467e-06	other
Th	1.35935e-08	0.222648	0.152	0.045	0.000230288	female specific
Srxn1	1.67274e-14	0.219391	0.378	0.152	2.84834e-10	other
Plekhb1	2.98647e-08	0.217812	0.409	0.236	0.00050558	female specific
Pcdh7	1.16041e-09	0.215133	0.856	0.678	1.96886e-05	other
Tmem158	2.70806e-08	0.214001	0.799	0.621	0.000458475	other
App	6.60924e-14	0.213451	0.971	0.921	1.12516e-09	other
Cartpt	2.32128e-05	0.211625	0.13	0.054	0.387468	other
Hpcal1	4.47049e-11	0.211137	0.763	0.556	7.59626e-07	shared
Ids	2.14058e-11	0.210888	0.846	0.646	3.63813e-07	other
Disp2	7.27201e-12	0.208556	0.919	0.76	1.23639e-07	other
Pbx3	2.91363e-07	0.207485	0.187	0.079	0.00492083	female specific
Lynx1	4.52291e-10	0.207101	0.432	0.236	7.67764e-06	shared
Kl	5.48136e-11	0.207099	0.183	0.048	9.31338e-07	female specific
Fam46a	8.07902e-08	0.206533	0.389	0.227	0.00136624	female specific
Ets2	3.32463e-09	0.20611	0.648	0.415	5.63658e-05	shared
Clstn3	7.85919e-09	0.204671	0.763	0.562	0.000133205	other
Ppp1r17	2.25526e-10	0.203408	0.229	0.082	3.82899e-06	female specific
Chodl	1.70316e-08	0.200378	0.347	0.184	0.000288465	female specific
Slitrk1	2.15343e-09	0.197794	0.537	0.324	3.65221e-05	other
Adra2a	4.03173e-10	0.194131	0.172	0.048	6.84426e-06	shared
Hspa8	9.24607e-11	0.193995	0.985	0.946	1.57017e-06	shared
Ly6e	1.17021e-07	0.190462	0.656	0.447	0.00197836	other
Pou2f2	3.24833e-06	0.189433	0.542	0.367	0.0546141	other
Ywhah	1.6526e-12	0.187501	0.995	0.95	2.81124e-08	shared
Ptp4a1	1.13356e-07	0.187394	0.751	0.565	0.00191651	shared
Msi2	3.25826e-07	0.186961	0.559	0.379	0.00550158	female specific
Rpl22	5.60533e-08	0.186637	0.91	0.789	0.000948253	other
Snap25	2.57348e-06	0.186187	0.954	0.882	0.0433013	other
Chml	9.93568e-13	0.184684	0.2	0.048	1.69056e-08	shared
Mt3	2.64448e-08	0.183457	0.932	0.821	0.000447764	other
Tubb5	6.25075e-08	0.183008	0.917	0.787	0.00105738	other
Eef1b2	1.5615e-09	0.180564	0.944	0.841	2.64893e-05	shared
Ptpro	1.07636e-09	0.180168	0.731	0.49	1.82648e-05	other
Sema3a	3.71244e-12	0.180046	0.157	0.027	6.31337e-08	female specific
Rps6ka6	2.02283e-12	0.17839	0.247	0.077	3.44064e-08	other
Rasgrf2	6.16927e-06	0.177924	0.66	0.51	0.103502	other
Cbln2	5.47707e-05	0.177623	0.144	0.068	0.910508	other
Dner	1.61267e-07	0.176882	0.69	0.506	0.00272558	other
Meg3	1.24824e-12	0.17616	1	1	2.12363e-08	other
Sema6d	8.84204e-11	0.175203	0.235	0.084	1.50182e-06	other
Nop56	9.24701e-07	0.174296	0.634	0.444	0.0155951	other
Gpx3	1.64608e-06	0.173495	0.677	0.51	0.0277282	female specific
Fndc9	1.48085e-07	0.170909	0.536	0.338	0.00250294	female specific
H2-Q2	3.50462e-08	0.167692	0.17	0.059	0.000593227	shared
Ptpn5	3.21408e-06	0.16675	0.612	0.431	0.0540448	other
Slc18a2	2.10987e-06	0.164996	0.43	0.272	0.0355176	female specific
Crim1	5.02347e-05	0.164332	0.608	0.458	0.835454	other
Rxfp3	2.44535e-08	0.164014	0.109	0.02	0.000414096	other
Syp	4.73019e-08	0.163129	0.951	0.857	0.000800396	female specific
Pip4k2a	1.29488e-08	0.162894	0.186	0.066	0.000219378	other
Vstm2a	0.000548035	0.161808	0.487	0.385	1	other
Grik1	3.1368e-07	0.161764	0.299	0.161	0.00529711	shared
Neo1	1.0907e-05	0.161315	0.378	0.236	0.182594	other
Reep5	1.2968e-09	0.15978	0.941	0.794	2.20002e-05	other
Cxxc5	2.81866e-09	0.158687	0.233	0.091	4.78017e-05	female specific
Sez6l	2.88701e-06	0.15843	0.869	0.721	0.0485595	shared
Polr1d	7.89522e-08	0.158425	0.799	0.608	0.00133524	other
Eef2	2.26666e-07	0.157914	0.94	0.857	0.00382975	shared
Syndig1	3.1747e-11	0.15717	0.148	0.027	5.39509e-07	shared
mt-Co2	1.07344e-21	0.157111	1	1	1.82968e-17	shared
Gfra1	1.19368e-06	0.156946	0.405	0.247	0.0201159	shared
Slitrk6	3.47719e-09	0.156622	0.151	0.041	5.89487e-05	shared
Nectin3	1.58934e-08	0.156571	0.22	0.091	0.000269203	other
Idnk	4.21215e-08	0.155818	0.35	0.186	0.000712781	shared
Maf	5.33362e-08	0.155697	0.193	0.075	0.000902395	other
Parm1	7.05425e-07	0.15422	0.262	0.136	0.0118991	shared
Apoc3	1.78142e-09	0.152329	0.316	0.143	3.02165e-05	shared
Pam	1.87072e-06	0.152205	0.607	0.447	0.0314992	female specific
Hspa5	1.34645e-05	0.151961	0.631	0.447	0.225315	other
Saraf	1.41167e-06	0.151809	0.891	0.755	0.0237866	other
Spock2	3.25568e-06	0.151708	0.921	0.769	0.0547345	other
Me1	8.80193e-10	0.151471	0.233	0.088	1.49369e-05	other
Galnt16	1.09403e-05	0.151457	0.725	0.544	0.183141	other
Kcnk9	7.80849e-05	0.151253	0.443	0.308	1	other
Vstm2b	1.2936e-07	0.150481	0.344	0.188	0.00218671	female specific
Rbbp7	7.7748e-06	0.1502	0.498	0.331	0.13036	other
Hapln4	8.77106e-09	0.149995	0.309	0.15	0.000148643	shared
Plp1	9.15406e-06	0.149731	0.635	0.449	0.153376	other
Coch	9.35381e-08	0.148733	0.174	0.063	0.00158164	other
Mical2	1.93467e-09	0.148681	0.228	0.086	3.28139e-05	female specific
Trp53inp2	6.84984e-08	0.148375	0.314	0.163	0.00115865	other
Faim2	1.48024e-06	0.148271	0.945	0.855	0.0249376	other
Tubb3	4.1616e-05	0.148241	0.73	0.562	0.692656	other
Tpi1	2.06899e-05	0.147631	0.793	0.621	0.345667	other
Hspa4	2.74835e-05	0.147362	0.627	0.476	0.458342	other
Epdr1	3.96043e-06	0.147236	0.556	0.385	0.066555	other
Pcdh15	0.000104099	0.146634	0.383	0.256	1	other
Rps12	9.41594e-09	0.146575	0.997	0.98	0.000159563	female specific
Slitrk5	1.05702e-06	0.146386	0.481	0.302	0.0178213	other
Tmcc3	2.61866e-05	0.144991	0.767	0.619	0.436871	other
Sh3gl2	2.10952e-05	0.144817	0.524	0.367	0.352395	other
Dgkd	9.07793e-08	0.144753	0.314	0.159	0.00153508	other
Ctxn3	5.37174e-05	0.144678	0.163	0.079	0.893052	other
Lhfpl3	6.61273e-07	0.144553	0.253	0.127	0.0111557	shared
Odc1	0.000450708	0.144516	0.552	0.417	1	other
Klhl13	4.40348e-07	0.144487	0.319	0.177	0.00743308	female specific
Nrsn1	6.50887e-10	0.143989	0.991	0.939	1.10469e-05	other
Tuba4a	4.49766e-06	0.143601	0.619	0.44	0.0755562	other
Mast4	0.000280938	0.14335	0.527	0.381	1	other
Mef2c	0.000362819	0.14204	0.215	0.132	1	other
Hs3st5	1.71481e-07	0.141752	0.332	0.17	0.00289802	shared
Fstl5	0.000163075	0.141657	0.706	0.594	1	other
Snx10	2.08509e-07	0.141617	0.609	0.399	0.00352359	other
Got1	3.06544e-07	0.14036	0.593	0.385	0.00517692	shared
Gm16485	1.41824e-10	0.140093	0.174	0.045	2.40817e-06	shared
Ggct	1.56201e-08	0.138299	0.244	0.104	0.000264589	other
Miat	3.33669e-07	0.137746	0.582	0.381	0.00563366	female specific
Ucp2	3.82596e-06	0.137632	0.259	0.138	0.0643029	other
Rasgrf1	1.97191e-05	0.137409	0.428	0.29	0.329507	other
Nt5dc3	3.84761e-08	0.137386	0.343	0.179	0.000651207	other
Vat1	6.9064e-06	0.136827	0.868	0.753	0.115848	other
Pld3	7.72726e-05	0.136783	0.782	0.642	1	other
Ddhd1	4.2349e-06	0.136421	0.382	0.231	0.0711505	other
Mgat5	7.72506e-06	0.135432	0.469	0.302	0.129534	other
Abca2	1.73567e-06	0.13499	0.562	0.367	0.029227	other
Lrrfip2	2.45939e-07	0.13498	0.297	0.154	0.00415439	other
Rps6ka3	1.11897e-09	0.134963	0.126	0.023	1.89867e-05	other
Map2k7	3.91407e-07	0.134848	0.5	0.299	0.00660773	other
Col25a1	8.52319e-09	0.132964	0.183	0.061	0.000144451	other
Tmod1	3.05354e-05	0.132792	0.283	0.168	0.508994	other
Glra3	8.58823e-06	0.132566	0.281	0.161	0.143921	other
Rph3a	6.43031e-06	0.13162	0.312	0.179	0.107875	other
Actr1b	1.51027e-05	0.13156	0.6	0.435	0.252669	other
Cadm1	0.000123768	0.131136	0.945	0.891	1	other
Dpp6	1.06961e-06	0.130882	0.815	0.642	0.0180326	other
Cox5a	5.16452e-06	0.13045	0.611	0.433	0.0867123	other
Plcxd3	5.86074e-07	0.130307	0.448	0.268	0.00988941	other
Rnf145	5.51012e-06	0.130152	0.432	0.272	0.0924928	other
Bcat1	1.72013e-05	0.129997	0.482	0.315	0.287622	other
Dgkz	1.09491e-06	0.129997	0.268	0.141	0.0184547	female specific
Vdac1	5.84679e-06	0.129715	0.756	0.574	0.0981326	other
Prkcb	5.97027e-06	0.128751	0.485	0.311	0.100199	other
Snrpb	2.09464e-06	0.12867	0.295	0.161	0.0352632	female specific
Gabrg1	4.30865e-06	0.128622	0.549	0.379	0.0723853	other
6330403K07Rik	4.54997e-10	0.128411	0.998	0.998	7.72312e-06	female specific
Bhlhe41	1.12067e-06	0.128332	0.413	0.256	0.0188878	female specific
mt-Nd2	2.07603e-10	0.127842	0.998	0.998	3.52489e-06	shared
Opn3	2.56626e-08	0.127318	0.108	0.02	0.000434545	other
Arhgap6	5.06903e-06	0.127224	0.11	0.036	0.0851242	other
Tmx2	3.26645e-06	0.127131	0.787	0.615	0.0549122	other
Mapk3	1.35525e-06	0.126829	0.51	0.327	0.0228374	other
Ssr4	5.06926e-05	0.12627	0.65	0.476	0.843018	other
Cpeb1	1.07955e-08	0.126258	0.235	0.095	0.000182908	female specific
Brinp2	9.92361e-07	0.126149	0.452	0.274	0.0167352	shared
Ccdc85a	3.11936e-06	0.126107	0.308	0.172	0.0524583	other
Pfkm	2.30794e-05	0.125994	0.376	0.24	0.385264	other
Scn8a	2.18919e-06	0.125537	0.433	0.265	0.0368506	other
Sqle	5.88773e-07	0.125051	0.278	0.141	0.00993437	shared
Scn2b	0.0021921	0.124643	0.63	0.512	1	other
Capns1	0.00322422	0.124399	0.644	0.503	1	other
Tmem59l	1.30475e-05	0.124346	0.64	0.451	0.218363	other
Ddost	8.35014e-07	0.124068	0.397	0.229	0.0140842	other
Tspyl4	5.40512e-06	0.123047	0.924	0.859	0.0907412	other
Gstm7	2.7075e-05	0.122399	0.256	0.145	0.451584	other
Atp6ap2	0.000173535	0.122322	0.671	0.519	1	other
Cdh4	7.15653e-08	0.122269	0.127	0.034	0.00121046	shared
Lpp	2.21045e-08	0.122095	0.218	0.086	0.00037434	female specific
Rpl7	2.55228e-07	0.121836	0.986	0.961	0.00431106	female specific
Rack1	7.22035e-05	0.121744	0.863	0.746	1	other
Nsg1	2.99851e-05	0.121642	0.947	0.873	0.499852	other
Psap	5.64342e-05	0.121627	0.94	0.848	0.937992	other
Ddc	5.52609e-07	0.121556	0.243	0.116	0.00932528	other
Camk4	2.18722e-05	0.120834	0.266	0.154	0.365265	other
Dbn1	1.58288e-05	0.120549	0.538	0.374	0.264784	other
Mb21d2	5.12572e-06	0.12012	0.214	0.109	0.086066	other
Rps15a	2.43175e-07	0.119835	1	1	0.00410796	other
Gabbr1	0.00051406	0.119298	0.944	0.884	1	other
Kpnb1	6.67841e-05	0.119297	0.575	0.395	1	other
Gda	0.00211356	0.11921	0.73	0.633	1	other
Gpr158	1.05788e-07	0.119114	0.317	0.161	0.00178866	female specific
Maob	4.8394e-07	0.118825	0.134	0.043	0.00816746	other
Tpd52	1.69671e-05	0.118405	0.434	0.277	0.283758	other
Hsph1	0.000647604	0.118335	0.853	0.698	1	other
Chst11	4.69084e-07	0.118309	0.262	0.129	0.00791721	shared
Tmem50b	9.47726e-06	0.118303	0.512	0.331	0.158773	other
Rpl23a	3.04714e-09	0.118275	1	1	5.16703e-05	other
Mcfd2	5.05217e-07	0.118198	0.516	0.331	0.00852605	other
Prrt1	2.98432e-05	0.118016	0.576	0.385	0.497515	other
Unc5d	0.000520633	0.11792	0.761	0.633	1	other
Rpl18	6.73811e-05	0.117909	0.971	0.925	1	other
Il1rap	0.000114291	0.117861	0.28	0.17	1	other
Syngr1	0.000117725	0.117329	0.855	0.707	1	other
Hcn1	0.000213863	0.116805	0.431	0.302	1	other
Egr2	6.63191e-07	0.116716	0.069	0.007	0.0111874	female specific
Dnm3	2.59335e-05	0.115109	0.761	0.617	0.432674	other
Sgcb	8.68933e-06	0.114551	0.34	0.2	0.145607	other
Onecut2	2.25108e-07	0.114496	0.078	0.009	0.00380365	female specific
Ndufa12	0.000232462	0.114402	0.716	0.562	1	other
Rpl31	3.70076e-07	0.1142	1	0.995	0.00624799	other
Wnt4	9.776e-06	0.114091	0.129	0.05	0.163738	other
Endod1	7.37434e-06	0.114081	0.451	0.281	0.123668	other
B2m	3.24241e-05	0.11385	0.093	0.029	0.540445	other
mt-Nd4	9.81453e-11	0.113755	1	1	1.6666e-06	shared
Rplp2	1.89918e-06	0.113631	1	1	0.0319765	female specific
Cisd3	4.94542e-06	0.113201	0.365	0.215	0.0830534	other
Npr2	1.6604e-06	0.113176	0.243	0.122	0.0279661	other
Ralgps2	0.000758886	0.113056	0.447	0.315	1	other
Rpl7a	2.34629e-05	0.112725	0.981	0.959	0.39162	other
Phyhipl	7.25138e-05	0.112129	0.51	0.349	1	other
Anxa6	6.15329e-06	0.111904	0.227	0.116	0.10324	other
Fam214b	2.67578e-05	0.111601	0.251	0.143	0.446347	other
Cdkl2	1.07064e-06	0.11138	0.554	0.361	0.0180489	other
Nexmif	0.00168015	0.111299	0.425	0.308	1	other
Ube2ql1	4.10755e-05	0.111278	0.41	0.263	0.683701	other
Klf9	0.000853701	0.111118	0.377	0.259	1	other
D930016D06Rik	5.32602e-06	0.11088	0.258	0.138	0.0894185	other
Tmem151a	6.19586e-05	0.110739	0.428	0.288	1	other
Ryr2	3.43414e-06	0.110644	0.313	0.175	0.0577211	other
Ngef	6.14616e-07	0.11048	0.19	0.079	0.0103698	other
Slc35e3	9.41737e-06	0.110462	0.359	0.211	0.157779	other
Prickle2	0.000182523	0.110437	0.476	0.342	1	other
Clmp	1.07766e-06	0.110206	0.392	0.222	0.018165	other
2010107E04Rik	0.000297316	0.109914	0.807	0.649	1	other
Acly	2.72147e-05	0.109709	0.519	0.354	0.453887	other
Ubl3	0.000155097	0.109597	0.651	0.483	1	other
As3mt	4.03944e-08	0.109271	0.254	0.109	0.000683594	female specific
Trp53i11	5.72961e-06	0.109265	0.241	0.127	0.0961715	other
Nrsn2	1.83537e-05	0.109253	0.972	0.912	0.306837	other
Chchd10	0.000544228	0.109105	0.78	0.619	1	other
Nell1	1.43516e-06	0.109088	0.457	0.279	0.024181	other
Id4	8.55146e-05	0.109006	0.646	0.478	1	other
Chpt1	0.000451809	0.108967	0.297	0.2	1	other
Usp48	6.93703e-06	0.107747	0.342	0.197	0.116355	other
Slco3a1	9.93952e-07	0.107729	0.265	0.134	0.016761	other
Rpl5	0.000274224	0.10771	0.967	0.898	1	other
S100a10	1.83048e-08	0.107685	0.139	0.036	0.00031001	female specific
Scrn1	0.00020053	0.107662	0.812	0.662	1	other
B4gat1	1.28324e-05	0.107535	0.387	0.234	0.214789	other
Synj1	0.00057523	0.107254	0.917	0.839	1	other
Rpl15	2.2777e-06	0.107211	0.994	0.984	0.0383336	other
Map1a	9.67312e-05	0.107035	0.721	0.54	1	other
Galnt13	7.5615e-05	0.106834	0.374	0.243	1	other
Rps20	1.92977e-06	0.106337	0.994	0.991	0.0324896	other
Rpl29	3.64408e-05	0.10618	0.998	0.977	0.607032	other
Irs2	2.37986e-05	0.10609	0.425	0.274	0.397174	other
4833439L19Rik	5.74563e-05	0.106002	0.571	0.401	0.954809	other
Map4	0.0011622	0.105983	0.802	0.673	1	other
Ankrd46	4.90566e-05	0.10557	0.598	0.413	0.816007	other
Cntnap2	0.00119921	0.105534	0.819	0.683	1	other
Znrf2	1.52778e-05	0.104798	0.21	0.107	0.255582	other
Dpy19l1	6.59027e-05	0.104672	0.257	0.147	1	other
Rps21	7.89073e-08	0.104524	0.998	0.998	0.00133456	female specific
Epb41l4aos	2.19554e-06	0.104523	0.347	0.19	0.0369553	female specific
Atp6ap1	4.17906e-05	0.104486	0.722	0.537	0.69552	other
Ormdl1	3.16475e-06	0.104098	0.191	0.088	0.0532185	other
Gabra2	0.000981211	0.103887	0.694	0.567	1	other
Enc1	0.000641032	0.103778	0.677	0.531	1	other
Cspg5	0.00141465	0.103708	0.725	0.578	1	other
Elavl4	0.00238268	0.103704	0.849	0.739	1	other
Stmn4	7.81486e-06	0.103702	0.532	0.358	0.131024	other
Rab3c	0.0024149	0.103645	0.781	0.649	1	other
Nbea	0.000130861	0.103409	0.769	0.61	1	other
Pkm	0.000669664	0.103338	0.904	0.807	1	other
Ptprg	0.000349357	0.103304	0.46	0.322	1	other
Trp53inp1	1.71058e-06	0.103249	0.139	0.05	0.0288079	female specific
Stxbp6	0.000749002	0.103237	0.069	0.025	1	other
Srpr	2.8247e-05	0.102939	0.398	0.247	0.471018	other
Smim1	2.17326e-05	0.102615	0.272	0.156	0.362955	other
Sdhaf4	3.96923e-07	0.102574	0.367	0.2	0.00670047	other
Rhobtb2	1.6582e-06	0.10249	0.323	0.179	0.0279307	female specific
Scml4	3.21002e-07	0.102367	0.239	0.109	0.00542044	shared
Tmem50a	0.00012862	0.102096	0.653	0.472	1	other
Idi1	2.27511e-05	0.102079	0.245	0.136	0.379829	other
Pou6f2	0.00336446	0.101945	0.062	0.025	1	other
Ublcp1	1.87947e-05	0.101835	0.263	0.15	0.314135	other
2900055J20Rik	0.0087844	0.101709	0.247	0.179	1	other
Pigs	1.81881e-05	0.10128	0.3	0.17	0.304087	other
Vsnl1	0.0334779	0.101124	0.617	0.533	1	other
Seh1l	3.41405e-06	0.101099	0.276	0.147	0.0573868	other
Syt17	1.40511e-07	0.101074	0.141	0.043	0.00237506	female specific
Rtn3	3.8281e-05	0.100968	0.992	0.952	0.637417	other
Caml	1.08774e-05	0.100799	0.239	0.127	0.18211	other
Tuba1b	0.00179289	0.10049	0.901	0.828	1	other
March6	0.000132571	0.100368	0.772	0.608	1	other
Atp1b1	5.20321e-05	0.100157	0.992	0.964	0.865086	other
Gm9866	8.21121e-06	0.0999257	0.234	0.12	0.137645	other
Atp5c1	0.000569815	0.0999232	0.712	0.549	1	other
Ctsd	0.000677438	0.0998815	0.594	0.435	1	other
Ache	1.05633e-06	0.0997907	0.414	0.243	0.0178108	other
Rnf149	7.02459e-06	0.0997231	0.409	0.252	0.117816	other
Grsf1	0.00010105	0.0996861	0.47	0.315	1	other
Higd1a	9.18034e-05	0.0996701	0.501	0.338	1	other
Rpl36a	3.57163e-05	0.0996382	0.998	0.982	0.595069	other
Mbd6	2.83991e-06	0.0995561	0.215	0.104	0.047773	other
Mpped2	3.87246e-06	0.0994604	0.246	0.125	0.0650806	other
Csrnp3	0.00269551	0.0994328	0.585	0.465	1	other
Gpat4	6.58891e-05	0.0994177	0.334	0.206	1	other
Hacd3	8.49619e-06	0.0993545	0.647	0.46	0.142396	other
Csnk2b	3.82229e-05	0.0993095	0.344	0.211	0.636526	other
Atxn2l	0.000242565	0.0993057	0.512	0.356	1	other
Plcl1	2.4206e-06	0.0991978	0.159	0.063	0.0407338	other
Abat	0.00136036	0.0987092	0.819	0.689	1	other
Cers5	8.83962e-05	0.0986948	0.293	0.179	1	other
Brd1	6.01304e-06	0.0986524	0.242	0.125	0.100911	other
Kbtbd11	0.000105491	0.0986173	0.414	0.279	1	other
Esyt3	0.000170618	0.0985766	0.183	0.098	1	other
Car11	2.61773e-06	0.0982411	0.225	0.107	0.0440407	other
Wdr6	0.000331317	0.0982357	0.944	0.884	1	other
mt-Atp6	2.74613e-11	0.0979561	1	1	4.66705e-07	other
Pcyox1	0.00020237	0.0979103	0.542	0.381	1	other
Map1lc3a	0.00757602	0.0978523	0.917	0.803	1	other
Tunar	1.07368e-05	0.097827	0.254	0.138	0.179765	other
Gnpda1	2.55896e-06	0.097327	0.269	0.138	0.0430595	other
Ptprm	5.08245e-06	0.0972753	0.181	0.082	0.0853445	other
Chl1	0.00331515	0.0972123	0.698	0.576	1	other
1190002N15Rik	0.000131375	0.0969496	0.175	0.093	1	other
Tsc22d1	0.000138362	0.0968567	0.883	0.73	1	other
Ptprt	0.000146251	0.0968046	0.118	0.052	1	other
Snhg6	1.02361e-05	0.0965988	0.585	0.392	0.171394	other
Tsr2	0.000157426	0.0965932	0.557	0.392	1	other
Ranbp9	4.21181e-06	0.0965637	0.313	0.172	0.0707667	other
Enpp2	0.000112262	0.0964332	0.213	0.118	1	other
Clta	0.0129867	0.0962703	0.847	0.748	1	other
Rpl36	2.01644e-05	0.0961959	0.999	0.995	0.336906	other
Dusp3	7.63206e-05	0.0957563	0.492	0.329	1	other
Raph1	0.00189147	0.0957249	0.597	0.447	1	other
Rad23b	2.16898e-05	0.0956108	0.775	0.583	0.362263	other
Nr2f6	1.47673e-06	0.0955406	0.164	0.066	0.0248799	other
Sdf2l1	6.04029e-06	0.0953667	0.15	0.061	0.101362	other
Trim2	0.00259047	0.0949903	0.814	0.701	1	other
Spag9	0.000640304	0.0948391	0.827	0.678	1	other
Rplp0	0.00491166	0.0946492	0.948	0.896	1	other
Chst2	1.31888e-05	0.0946263	0.185	0.088	0.220715	other
Glra2	0.00760061	0.0945816	0.28	0.206	1	other
Tnxb	2.12143e-07	0.0945709	0.073	0.007	0.00358478	other
Pop5	0.000658571	0.0945673	0.525	0.372	1	other
Msmo1	0.000188281	0.0944253	0.418	0.283	1	other
Mrpl3	8.33727e-06	0.0940059	0.308	0.172	0.139741	other
Rgma	0.000244357	0.0939866	0.123	0.057	1	other
Elovl5	1.2013e-05	0.0938636	0.221	0.111	0.201086	other
Tdrp	3.09359e-06	0.0937563	0.184	0.082	0.0520311	other
Uqcrh	2.94193e-05	0.0934659	0.994	0.971	0.490508	other
Slc6a11	0.0324863	0.0933438	0.459	0.361	1	other
Tmem38a	0.00014465	0.093332	0.278	0.17	1	other
Syne2	8.43661e-05	0.0931929	0.211	0.113	1	other
Nat8l	0.00044062	0.0929787	0.505	0.356	1	other
Kcnk2	0.0325577	0.0929584	0.596	0.478	1	other
Nrcam	3.80692e-05	0.0927524	0.441	0.279	0.634005	other
Fam199x	2.80792e-05	0.0927124	0.309	0.181	0.468249	other
Camk2d	0.0254631	0.0926891	0.641	0.544	1	other
Cdv3	0.00691948	0.0926534	0.569	0.444	1	other
Mrpl9	7.48703e-05	0.0925277	0.261	0.15	1	other
Tbca	0.00361393	0.0924809	0.917	0.81	1	other
Opa1	6.53312e-05	0.0924501	0.463	0.304	1	other
Tgoln1	7.81483e-05	0.0923893	0.917	0.794	1	other
Ppa1	4.11074e-06	0.0922701	0.352	0.202	0.0690769	other
Rplp1	1.42383e-05	0.0922248	1	0.998	0.238234	other
Htr1b	0.0078499	0.0921099	0.32	0.238	1	other
Prelid1	0.000469786	0.0919033	0.501	0.345	1	other
Rasd1	3.39835e-05	0.091681	0.073	0.018	0.566336	other
Uba3	2.26193e-05	0.0916516	0.397	0.243	0.377651	other
Large1	4.8297e-05	0.0916485	0.377	0.24	0.803421	other
Pls3	0.000190566	0.0914822	0.376	0.245	1	other
Immp1l	9.09279e-05	0.0913413	0.326	0.197	1	other
Rps10	0.000592901	0.0912038	0.994	0.975	1	other
Tmbim6	0.00494637	0.0910582	0.728	0.571	1	other
Slc4a8	9.57461e-05	0.0910022	0.368	0.231	1	other
Ppp4r4	2.37563e-05	0.0909071	0.161	0.075	0.396493	other
Ammecr1l	0.000115528	0.0908743	0.268	0.156	1	other
Rps13	5.57874e-05	0.0907391	0.996	0.989	0.927297	other
Ppp2r3d	7.60842e-05	0.090629	0.217	0.118	1	other
Nin	4.92528e-06	0.0905635	0.165	0.07	0.0827201	other
Zfand3	0.000147559	0.0902357	0.237	0.138	1	other
Cycs	0.000863883	0.0902025	0.659	0.492	1	other
2610001J05Rik	0.000150035	0.0897373	0.273	0.166	1	other
Eef1a2	3.87546e-05	0.0897359	0.646	0.454	0.645186	other
Cadps2	0.00589743	0.0897276	0.268	0.19	1	other
Uhrf1bp1l	0.000382312	0.0896051	0.36	0.238	1	other
Stk19	0.0160748	0.0895909	0.424	0.327	1	other
Amotl1	0.000590296	0.0894297	0.485	0.345	1	other
Rpl28	0.000279122	0.0893171	0.981	0.934	1	other
Asic2	0.000207153	0.0892927	0.42	0.281	1	other
Aff4	0.00189284	0.0892134	0.843	0.71	1	other
Qdpr	0.000140634	0.0892022	0.367	0.236	1	other
Slc25a12	0.000470165	0.0891688	0.512	0.356	1	other
Arpc3	0.000857708	0.0891589	0.525	0.372	1	other
Fbxl19	0.000111556	0.0888026	0.23	0.129	1	other
Dlg4	0.000658274	0.0887111	0.868	0.755	1	other
Tspan17	6.6205e-05	0.088681	0.344	0.213	1	other
Ina	0.0159177	0.0886529	0.78	0.671	1	other
H2afv	0.00211804	0.0885522	0.423	0.297	1	other
Mrpl12	0.000320113	0.088534	0.429	0.29	1	other
Adcyap1r1	0.000675874	0.0882801	0.599	0.422	1	other
Susd2	4.47064e-05	0.0881534	0.187	0.095	0.743825	other
Aifm3	1.70465e-05	0.0880611	0.237	0.127	0.285068	other
Ikzf2	3.31206e-05	0.0878638	0.138	0.059	0.551988	other
Pnmal2	3.66086e-05	0.0878431	0.978	0.959	0.609753	other
Cntnap1	9.90637e-05	0.0876466	0.253	0.15	1	other
Cdk16	3.99125e-05	0.0870835	0.335	0.2	0.664383	other
Tyms	1.01526e-05	0.0870666	0.121	0.043	0.170005	other
Mlec	0.00512931	0.0868921	0.567	0.429	1	other
Trrap	3.23637e-06	0.0867054	0.45	0.272	0.0544163	other
Nptxr	0.00471434	0.0866935	0.798	0.664	1	other
Fkbp2	0.0058824	0.0866116	0.677	0.522	1	other
Rmnd5a	0.00066821	0.0865808	0.373	0.254	1	other
Zfp92	2.10987e-05	0.0864523	0.378	0.229	0.352433	other
Mcee	3.56797e-05	0.0864185	0.3	0.172	0.594495	other
Prkca	0.00125033	0.0863967	0.186	0.113	1	other
Tmem9b	0.000386458	0.0862697	0.363	0.243	1	other
Rps2	8.14682e-05	0.08618	0.999	0.986	1	other
Jmjd1c	0.000268075	0.0861171	0.531	0.356	1	other
Pim3	4.17018e-06	0.0860827	0.199	0.091	0.0700716	other
Dr1	1.60617e-05	0.0860712	0.268	0.147	0.268649	other
Lin7b	0.000306529	0.0860515	0.283	0.175	1	other
Cnih1	0.00016885	0.0859002	0.533	0.37	1	other
Tgfbr1	2.27818e-05	0.0858826	0.117	0.043	0.380319	other
Utrn	7.39241e-06	0.0856645	0.111	0.036	0.123963	other
Ppa2	1.86481e-05	0.085597	0.2	0.098	0.311703	other
Lrp11	1.5867e-05	0.0855468	0.427	0.268	0.265408	other
Hprt	0.00117216	0.085369	0.679	0.515	1	other
Usp12	0.00129937	0.0852902	0.272	0.181	1	other
Ykt6	0.000618288	0.0852271	0.347	0.229	1	other
Nptn	0.000859497	0.0852099	0.757	0.617	1	other
Ccdc167	0.000277005	0.0851993	0.127	0.061	1	other
Hcn3	6.07025e-06	0.085158	0.29	0.156	0.101859	other
Pdcd4	0.0225025	0.0850625	0.763	0.658	1	other
Pik3r3	3.82474e-05	0.0850251	0.248	0.136	0.636895	other
Add1	0.00154366	0.0849179	0.742	0.578	1	other
Tor1b	0.000112284	0.0849141	0.253	0.147	1	other
Chrnb2	8.8524e-05	0.084913	0.36	0.222	1	other
Cltb	0.00205002	0.0848951	0.822	0.701	1	other
Rpl10a	0.00036387	0.0847186	0.991	0.977	1	other
Slc48a1	0.000789928	0.0845115	0.419	0.293	1	other
Krt222	8.31445e-06	0.0840549	0.186	0.086	0.139367	other
Slc25a1	8.96517e-05	0.0837999	0.333	0.204	1	other
Ak4	0.000705392	0.0837282	0.38	0.261	1	other
Eif1b	0.00058618	0.0836976	0.944	0.891	1	other
Gm12258	3.27163e-06	0.0836606	0.14	0.052	0.0549961	other
Magee1	0.00143952	0.0835142	0.619	0.456	1	other
Rpl34	0.000111524	0.0834365	1	0.993	1	other
Rpl39	9.92848e-05	0.0832944	0.998	1	1	other
Etnk2	8.27018e-05	0.0832063	0.253	0.143	1	other
Lsm11	1.7377e-05	0.0830596	0.148	0.063	0.290543	other
Plpp7	8.35775e-07	0.0830106	0.114	0.032	0.0140962	other
Fgf13	0.00128401	0.0829482	0.353	0.247	1	other
Txndc17	0.00206316	0.0828998	0.641	0.497	1	other
Rock2	0.0023371	0.0827285	0.581	0.451	1	other
Baiap2	0.00593316	0.0824887	0.438	0.329	1	other
Pgam1	0.0127725	0.0824842	0.807	0.717	1	other
Slc38a10	6.80416e-05	0.0824653	0.23	0.127	1	other
1110017D15Rik	0.000290606	0.0822404	0.174	0.095	1	other
Ndufa1	0.00354137	0.0822185	0.556	0.429	1	other
Rusc1	0.000445018	0.0821973	0.332	0.218	1	other
Krtcap2	3.58441e-05	0.0821591	0.565	0.381	0.597127	other
Med13l	0.000610092	0.0821379	0.434	0.295	1	other
Rnf112	0.00348424	0.0821279	0.614	0.483	1	other
Plcg1	3.43375e-05	0.0821059	0.256	0.143	0.572201	other
Gpr27	0.000367196	0.0819818	0.409	0.277	1	other
Gas7	0.00270957	0.0819142	0.631	0.494	1	other
Nudt10	0.000631479	0.0818867	0.425	0.297	1	other
Cntnap4	0.00100003	0.0818131	0.388	0.265	1	other
Hk1	0.00384736	0.0814775	0.553	0.417	1	other
Snx7	2.24289e-06	0.0814596	0.125	0.041	0.0377501	other
Gm20300	5.1218e-05	0.0814572	0.279	0.163	0.851703	other
Ak1	0.000862833	0.0814214	0.458	0.322	1	other
Uchl1	0.0328415	0.0813843	0.85	0.771	1	other
Tac2	0.0150144	0.0813425	0.069	0.036	1	other
Gabra3	0.00363194	0.0813284	0.643	0.497	1	other
Polr3e	2.22945e-05	0.0812768	0.164	0.075	0.372252	other
Pigq	0.000109365	0.0811897	0.241	0.136	1	other
Ndrg4	0.00263892	0.0811656	0.96	0.923	1	other
Nxn	9.54501e-06	0.0811457	0.083	0.02	0.159898	other
Mthfsl	6.36839e-05	0.0809902	0.241	0.134	1	other
Ank	0.000181895	0.0809446	0.315	0.197	1	other
Rap1gds1	4.40907e-05	0.080924	0.567	0.379	0.733669	other
Zrsr1	3.926e-05	0.0807643	0.477	0.304	0.653561	other
Tcf25	0.00034545	0.0807057	0.938	0.846	1	other
Rpl17	1.73272e-06	0.0806399	1	1	0.029179	other
Phlda1	0.00142232	0.0806006	0.192	0.116	1	other
Actg1	0.000322837	0.0805285	0.972	0.912	1	other
Cdipt	0.00543019	0.0804619	0.497	0.37	1	other
Igsf9b	0.00119927	0.0804319	0.415	0.293	1	other
Tbc1d20	2.13658e-05	0.0804185	0.28	0.159	0.356873	other
Paqr8	0.000129748	0.0803464	0.116	0.05	1	other
Gm42067	0.00012281	0.0803199	0.23	0.132	1	other
Sar1a	0.00153467	0.0802275	0.602	0.454	1	other
Poglut1	0.00119403	0.0802194	0.416	0.288	1	other
Vamp1	0.000254329	0.080205	0.228	0.132	1	other
Grb10	0.0137297	0.0801367	0.797	0.658	1	other
Ganab	0.000835014	0.0801327	0.433	0.299	1	other
Jun	0.00119894	0.0800426	0.199	0.12	1	other
Gpr137c	8.54729e-06	0.0799291	0.281	0.154	0.143244	other
Rpl36al	0.00288555	0.0798934	0.907	0.78	1	other
Sec22a	3.65581e-05	0.0798856	0.207	0.107	0.608948	other
Bid	1.54247e-06	0.0797176	0.159	0.061	0.0259844	other
6030419C18Rik	0.000290614	0.0796958	0.307	0.193	1	other
Arl6ip5	5.66647e-05	0.079464	0.551	0.381	0.941768	other
Hsd17b12	0.000478876	0.0792895	0.321	0.209	1	other
Rtraf	0.00102799	0.0792093	0.846	0.726	1	other
Ppip5k1	0.000258753	0.0790652	0.367	0.236	1	other
Celf3	0.000770667	0.0789629	0.624	0.449	1	other
Trhr	4.53539e-06	0.0788974	0.198	0.093	0.0761854	other
Dstn	0.00101878	0.0788698	0.73	0.565	1	other
Fdft1	0.00088318	0.078854	0.311	0.204	1	other
Taf15	0.000902245	0.0788497	0.427	0.295	1	other
Adk	0.000226347	0.0788227	0.16	0.082	1	other
Cttn	0.000181692	0.0787885	0.46	0.306	1	other
Ncdn	0.016822	0.0786724	0.648	0.519	1	other
Pcdh20	0.00331829	0.0785533	0.428	0.313	1	other
Snx19	4.33209e-05	0.078499	0.226	0.122	0.720947	other
Rab40b	2.54972e-05	0.0784792	0.141	0.059	0.425421	other
Aldh9a1	7.98437e-05	0.0783243	0.176	0.088	1	other
Gpr83	0.00164092	0.0783116	0.141	0.079	1	other
Akap8l	7.42646e-05	0.078091	0.5	0.331	1	other
Pcp4l1	3.77153e-05	0.07809	0.107	0.039	0.628149	other
Nfkbia	0.00011276	0.0780893	0.194	0.102	1	other
Ezr	1.00242e-05	0.0780741	0.113	0.039	0.167865	other
Apba2	0.00145576	0.0780576	0.36	0.249	1	other
Gnal	0.000250929	0.0780537	0.404	0.27	1	other
Acsl4	0.000320919	0.0779821	0.347	0.222	1	other
Med13	0.00268737	0.0779357	0.315	0.218	1	other
Fut9	9.90717e-05	0.0778916	0.525	0.365	1	other
Cdc123	0.00122884	0.0777069	0.357	0.243	1	other
Snap47	0.0123453	0.0776513	0.794	0.667	1	other
Dnajc15	0.0003606	0.0776381	0.354	0.229	1	other
Sec23b	0.000216143	0.0775237	0.174	0.093	1	other
Cadps	0.00804134	0.0774529	0.769	0.624	1	other
Carmil3	1.9235e-05	0.0774456	0.379	0.229	0.321456	other
Rhoq	9.89874e-05	0.077376	0.122	0.052	1	other
Gnptab	0.00010481	0.0772788	0.283	0.168	1	other
Zdhhc22	7.92526e-06	0.0770661	0.391	0.231	0.132867	other
Fbxo2	0.000373177	0.0769877	0.287	0.181	1	other
Tmem47	0.00102077	0.0765813	0.454	0.327	1	other
Lgi3	0.00021041	0.0765722	0.227	0.132	1	other
Shisa2	0.000446692	0.0765436	0.107	0.048	1	other
Dhx40	0.000272124	0.0764728	0.167	0.088	1	other
Rnf152	0.000326072	0.0764538	0.145	0.073	1	other
Dhdh	5.0202e-05	0.0763007	0.126	0.052	0.834959	other
Pgk1	0.000254236	0.0762327	0.562	0.397	1	other
Entpd5	5.41806e-06	0.0761002	0.132	0.048	0.0909529	other
Cep83	4.4046e-05	0.0760934	0.163	0.077	0.732969	other
Gnpda2	0.00102661	0.0760598	0.219	0.134	1	other
Gadd45a	0.000130765	0.0760426	0.104	0.041	1	other
Cep120	0.000911767	0.0760226	0.309	0.202	1	other
Ank1	0.000213935	0.0760155	0.16	0.082	1	other
Cd83	0.00222152	0.0758883	0.295	0.202	1	other
Rps27l	0.00100432	0.0758387	0.382	0.261	1	other
Rps17	0.00193175	0.0757366	0.999	0.984	1	other
Slc25a3	0.00362625	0.0756894	0.832	0.694	1	other
Fkbp14	0.000112128	0.0756572	0.117	0.05	1	other
Acox1	0.00150502	0.075543	0.549	0.388	1	other
Btg3	0.000216424	0.0754213	0.083	0.029	1	other
Pnma3	0.00223462	0.0753135	0.511	0.37	1	other
Slc25a14	0.00105474	0.0752739	0.293	0.19	1	other
Fem1b	0.00456844	0.0752691	0.699	0.551	1	other
Stard4	8.19132e-05	0.0752565	0.172	0.086	1	other
Snap91	0.00405428	0.0751812	0.786	0.655	1	other
Park7	0.000860287	0.0751391	0.562	0.404	1	other
Epm2a	9.86912e-05	0.0751244	0.257	0.15	1	other
Ube2e2	0.000322277	0.0750857	0.452	0.302	1	other
Ube2j1	0.000795034	0.0750383	0.538	0.374	1	other
Eef1a1	0.00101567	0.0749257	1	1	1	other
Sytl4	0.000163753	0.0749055	0.037	0.002	1	other
Foxk1	0.000315876	0.0748282	0.181	0.1	1	other
Fhod3	6.11099e-06	0.0748053	0.112	0.036	0.102536	other
Ube2r2	0.00142996	0.074757	0.737	0.583	1	other
Kcnn2	9.64344e-06	0.0746588	0.103	0.032	0.161528	other
Cgn	7.70613e-05	0.0746288	0.213	0.113	1	other
Vps41	0.000350572	0.0745734	0.432	0.293	1	other
Gm26782	7.01382e-05	0.0745098	0.435	0.274	1	other
Rab15	5.18913e-05	0.0744279	0.528	0.358	0.862796	other
Xpo6	7.74481e-05	0.0743921	0.367	0.234	1	other
Cnksr2	7.75877e-05	0.0743339	0.193	0.1	1	other
Slc12a2	0.000193803	0.0743012	0.262	0.154	1	other
Gm42418	0.0315331	0.0741916	0.616	0.497	1	other
Hspa4l	0.0267428	0.0741605	0.721	0.596	1	other
Ssr1	0.00634439	0.0741491	0.835	0.717	1	other
Plaa	0.000124404	0.074064	0.214	0.118	1	other
Pmpca	0.000637781	0.0740093	0.287	0.181	1	other
Txn2	0.000720688	0.074004	0.487	0.342	1	other
Lrpap1	0.00494619	0.0739203	0.637	0.494	1	other
AF529169	0.000111288	0.0738695	0.102	0.039	1	other
Ebf4	0.000281966	0.0735786	0.157	0.082	1	other
Rpl26	7.07055e-06	0.0735777	1	1	0.11858	other
Pak2	0.000321048	0.0735108	0.343	0.218	1	other
Hid1	4.61566e-05	0.0735021	0.323	0.193	0.767907	other
Banp	0.000611612	0.0734311	0.249	0.154	1	other
Resp18	0.0224243	0.0734159	0.783	0.649	1	other
Plekhm3	0.000195642	0.0733501	0.202	0.111	1	other
Dgkb	0.0715604	0.0732804	0.745	0.667	1	other
Eif3d	0.00191011	0.073177	0.309	0.209	1	other
Fgd1	0.000141316	0.073094	0.123	0.054	1	other
Epha10	0.000737608	0.0730342	0.159	0.088	1	other
Selenof	0.00340639	0.0729723	0.611	0.458	1	other
Rab26os	0.000337591	0.0729126	0.5	0.351	1	other
Ctdnep1	0.0013725	0.0728961	0.306	0.2	1	other
Icam5	0.000108372	0.0727655	0.111	0.045	1	other
Csnk1e	0.00183985	0.0727473	0.576	0.433	1	other
Map1lc3b	0.00589152	0.0726953	0.597	0.46	1	other
Nt5c3	0.0012093	0.0726518	0.327	0.218	1	other
Gnl1	0.000236437	0.0725779	0.411	0.274	1	other
Zfp277	0.00031985	0.0725303	0.111	0.05	1	other
Tsnax	0.00738953	0.0724402	0.609	0.469	1	other
Pdha1	0.00297177	0.0724038	0.522	0.379	1	other
Pcsk1n	0.000714392	0.0723247	0.991	0.955	1	other
Washc5	8.85849e-05	0.0723108	0.186	0.095	1	other
Stx1b	0.00346639	0.0721818	0.739	0.594	1	other
Bsdc1	0.00416617	0.0721304	0.384	0.281	1	other
Tmtc2	1.42878e-05	0.0720385	0.116	0.041	0.23905	other
Pabpn1	0.00573785	0.0719817	0.81	0.671	1	other
Dusp28	0.00012138	0.0719217	0.276	0.161	1	other
Ssr3	0.00462354	0.0718415	0.679	0.524	1	other
Rnf115	0.00306334	0.0718328	0.327	0.224	1	other
Fam189a2	0.000143308	0.0718205	0.099	0.039	1	other
Pigk	0.00347967	0.0717005	0.431	0.313	1	other
Mfn1	0.000594703	0.0716898	0.279	0.175	1	other
Alkbh7	0.00027723	0.0715295	0.178	0.095	1	other
Usp5	0.00240769	0.0715107	0.545	0.388	1	other
Itpkb	0.00017739	0.0712005	0.094	0.036	1	other
Tspan3	0.0126099	0.0711689	0.729	0.574	1	other
Snx30	0.00200392	0.0710952	0.425	0.299	1	other
Emb	0.000369654	0.0710772	0.343	0.22	1	other
Necab2	6.21047e-05	0.0709703	0.135	0.059	1	other
C2cd5	0.00161162	0.0708321	0.524	0.376	1	other
Zfp532	9.41442e-05	0.0707755	0.218	0.12	1	other
Otub1	0.00849467	0.0707184	0.659	0.524	1	other
Arl6	0.000447378	0.0706555	0.293	0.181	1	other
Akap7	0.00189112	0.070635	0.402	0.281	1	other
Ece2	6.52359e-05	0.0705596	0.296	0.175	1	other
Vdac2	0.00336108	0.0705448	0.647	0.485	1	other
Rogdi	0.0219897	0.0705056	0.545	0.438	1	other
Cadm3	0.0224176	0.070497	0.69	0.562	1	other
St3gal5	0.000463862	0.0704581	0.215	0.125	1	other
Cstf2	0.000584469	0.0704415	0.474	0.324	1	other
Cpe	0.00415377	0.0704111	0.92	0.823	1	other
Npc2	0.000215174	0.0702921	0.274	0.166	1	other
Sv2a	0.0588584	0.0702865	0.971	0.9	1	other
Insig1	0.00364618	0.0702799	0.295	0.206	1	other
Eif4g2	0.0139581	0.0702577	0.972	0.916	1	other
Ube2e1	0.000477105	0.0701742	0.617	0.438	1	other
Rnd2	0.00374706	0.070105	0.44	0.322	1	other
Otud6b	0.000119257	0.0700822	0.456	0.299	1	other
Ip6k1	0.00532086	0.0700106	0.726	0.583	1	other
Tac1	0.0791713	0.0700035	0.023	0.009	1	other
Dzank1	0.00611455	0.0699961	0.797	0.68	1	other
Rpl23	0.00171399	0.0698922	1	1	1	other
Mir9-3hg	1.68497e-05	0.0698821	0.073	0.016	0.281812	other
Nos1ap	0.00200205	0.0698216	0.479	0.338	1	other
Cltc	0.00542603	0.0696918	0.925	0.821	1	other
Pfkp	0.00262896	0.0696857	0.362	0.254	1	other
Glyr1	0.00449782	0.0696027	0.679	0.522	1	other
Smap1	2.52977e-05	0.0695762	0.474	0.293	0.422118	other
Snn	0.000411417	0.0695684	0.525	0.363	1	other
Asic1	0.000809105	0.0695091	0.365	0.245	1	other
Abhd12	0.00742972	0.0694933	0.603	0.458	1	other
Htr2c	0.0339264	0.0694874	0.286	0.222	1	other
Polr2g	0.000721232	0.0693629	0.559	0.408	1	other
Jund	8.90431e-05	0.0693296	0.461	0.299	1	other
Kcna6	0.0200621	0.069301	0.416	0.322	1	other
Ccz1	0.00105485	0.0692923	0.239	0.15	1	other
Kif22	0.00209768	0.0692874	0.195	0.12	1	other
Dnal1	0.00125204	0.0691499	0.42	0.295	1	other
Cdkl5	0.000166175	0.0691018	0.458	0.306	1	other
B3glct	5.73019e-05	0.0689693	0.083	0.025	0.952301	other
Atp1a1	0.000540307	0.0689349	0.468	0.32	1	other
Rab11a	0.00176251	0.0689231	0.54	0.385	1	other
Fam210a	3.47462e-05	0.0688867	0.219	0.113	0.578976	other
Cbarp	0.0117664	0.0688663	0.983	0.946	1	other
Arf3	0.0028458	0.068848	0.927	0.853	1	other
Dhcr7	0.000180286	0.0687836	0.207	0.113	1	other
Gosr1	0.000214092	0.0686063	0.242	0.141	1	other
Arhgap1	0.00223734	0.0685718	0.362	0.252	1	other
Ddx6	0.0163278	0.0685656	0.67	0.54	1	other
Nucb2	0.000603465	0.0683573	0.234	0.143	1	other
Dexi	9.9303e-05	0.0683035	0.35	0.218	1	other
Med14	0.000586909	0.0682393	0.275	0.17	1	other
Arxes1	0.000717423	0.0682043	0.36	0.24	1	other
Mkrn1	0.00422953	0.0681914	0.46	0.336	1	other
Bsg	0.0125324	0.0681689	0.809	0.701	1	other
Mien1	0.0175323	0.0679564	0.614	0.465	1	other
Eif4b	0.0157003	0.067938	0.742	0.596	1	other
Fam171b	0.0355193	0.0679209	0.861	0.769	1	other
Lpgat1	0.0103069	0.0679066	0.652	0.497	1	other
Trio	0.00244522	0.0678743	0.483	0.347	1	other
Ltbp4	0.00011349	0.067764	0.185	0.095	1	other
Mospd2	0.00043898	0.0677179	0.113	0.052	1	other
Ttc39b	5.793e-05	0.0676978	0.2	0.102	0.962622	other
Adcy2	0.00273854	0.0676962	0.204	0.129	1	other
Mmd	0.00486689	0.0676956	0.638	0.497	1	other
Pdia3	0.00200887	0.0676739	0.505	0.361	1	other
Fbxw5	0.000379901	0.0676103	0.321	0.2	1	other
Lman2	8.04739e-05	0.0673344	0.395	0.245	1	other
Atg16l2	8.24106e-05	0.0672529	0.179	0.088	1	other
Cdr2	1.89904e-05	0.0670901	0.119	0.043	0.317387	other
Armcx5	0.00058509	0.0670749	0.228	0.136	1	other
Hccs	5.82012e-05	0.0669952	0.23	0.125	0.967071	other
Arhgap24	0.000615566	0.0669207	0.261	0.159	1	other
AC101921.1	0.000521389	0.0668678	0.071	0.025	1	other
Il6st	0.00140607	0.066783	0.269	0.172	1	other
Susd4	0.0288924	0.066772	0.545	0.431	1	other
Minos1	0.0103043	0.0667532	0.866	0.732	1	other
Tbc1d9b	5.82126e-05	0.0667208	0.311	0.184	0.967203	other
Yeats2	0.00332	0.066693	0.333	0.231	1	other
Nudt21	0.00358567	0.0665684	0.553	0.404	1	other
Ripor1	0.000239007	0.0665657	0.227	0.129	1	other
Trpm7	0.000664522	0.0664848	0.275	0.172	1	other
Trpv2	0.00115835	0.0664832	0.167	0.095	1	other
Adipor1	0.00010342	0.066479	0.323	0.193	1	other
Zfp365	0.0113203	0.0664321	0.516	0.399	1	other
Nol9	8.4891e-05	0.0663346	0.11	0.043	1	other
Med10	0.000492477	0.0663142	0.3	0.186	1	other
Xxylt1	0.000222048	0.0662891	0.157	0.079	1	other
Sdc2	0.000261062	0.0662454	0.303	0.186	1	other
Syt1	0.914369	0.0662176	0.721	0.68	1	other
Tmem9	0.00258321	0.0661862	0.467	0.347	1	other
Snd1	0.000201985	0.0661809	0.256	0.15	1	other
Plec	0.000890833	0.0661733	0.235	0.145	1	other
Tmem143	0.000129847	0.0660483	0.111	0.045	1	other
Ddr1	8.60809e-05	0.0660207	0.146	0.068	1	other
Pet100	0.000467481	0.0659377	0.378	0.247	1	other
Phyh	2.19021e-05	0.0658046	0.239	0.125	0.365744	other
Cacna1g	0.000589586	0.0657986	0.242	0.147	1	other
Rps24	0.000242483	0.0656409	1	1	1	other
Bend7	0.000149959	0.0656248	0.132	0.059	1	other
Gpr101	0.0417184	0.0656088	0.24	0.188	1	other
Stk32c	0.000689695	0.065599	0.336	0.215	1	other
Camk2b	0.0172594	0.0655517	0.917	0.798	1	other
Hspe1	0.00638562	0.0655258	0.908	0.807	1	other
Rdh14	0.00122607	0.0655122	0.251	0.156	1	other
Paics	0.000777636	0.0654982	0.375	0.247	1	other
March11	0.000887935	0.0654756	0.17	0.095	1	other
A730046J19Rik	9.55184e-05	0.0654322	0.039	0.002	1	other
Pcyox1l	0.000190864	0.0653789	0.167	0.086	1	other
Rps4x	0.000719787	0.065294	1	1	1	other
Stbd1	1.71119e-05	0.0651637	0.06	0.009	0.286146	other
Mtmr6	0.00155062	0.0651384	0.568	0.404	1	other
Men1	2.87984e-05	0.065006	0.21	0.104	0.480185	other
Kcnj3	0.00120292	0.0649866	0.312	0.206	1	other
Cops2	0.022175	0.0648715	0.612	0.472	1	other
Rpl27a	0.00114448	0.0648607	1	1	1	other
Zxdc	0.00110874	0.064846	0.141	0.077	1	other
Cox20	0.00887607	0.0647797	0.47	0.351	1	other
Fktn	0.0109398	0.0647769	0.377	0.279	1	other
Pappa	0.000741915	0.0646357	0.07	0.025	1	other
Tmem256	0.00707972	0.0646155	0.636	0.49	1	other
Sdhaf1	0.00282902	0.0645908	0.314	0.213	1	other
Cntnap5a	0.0481353	0.0645032	0.451	0.354	1	other
Kifc2	0.000525233	0.064449	0.422	0.283	1	other
Tnks	0.00129322	0.0643302	0.419	0.283	1	other
Pip5k1b	1.84434e-05	0.0642792	0.089	0.025	0.308318	other
Shisa4	0.00418682	0.0642781	0.518	0.379	1	other
Fhad1	2.59208e-06	0.0642682	0.338	0.188	0.0436118	other
Morn2	0.00321269	0.064216	0.455	0.331	1	other
Rps9	0.0126293	0.0641952	1	0.993	1	other
Creb3l1	1.95682e-05	0.0641635	0.055	0.007	0.327005	other
Stt3b	0.000303789	0.0641406	0.29	0.177	1	other
Ythdc2	0.00318568	0.0641254	0.266	0.179	1	other
Clk4	0.00154773	0.0641156	0.347	0.236	1	other
Npm1	0.0549307	0.0640713	0.973	0.948	1	other
Btf3	0.0346312	0.063972	0.853	0.773	1	other
Ppm1f	0.00117762	0.0639194	0.268	0.172	1	other
Cap2	0.00346418	0.0638287	0.375	0.265	1	other
Tvp23a	6.39928e-05	0.063818	0.293	0.168	1	other
Man1b1	0.00316377	0.0637476	0.333	0.231	1	other
Rpl35	0.00409159	0.0637458	0.999	0.977	1	other
Dhx32	0.000149355	0.0637183	0.181	0.095	1	other
Ctnnb1	0.024409	0.0637064	0.77	0.63	1	other
Ap3m1	0.000183328	0.0636905	0.243	0.138	1	other
Slc6a7	0.00144455	0.0636627	0.285	0.184	1	other
Ndfip2	0.0064392	0.0636119	0.517	0.383	1	other
Tppp3	0.000427356	0.0635252	0.436	0.297	1	other
Entpd6	0.00375849	0.0635177	0.472	0.342	1	other
Arhgef4	0.0160712	0.0635071	0.658	0.533	1	other
9530068E07Rik	0.00179457	0.0634633	0.559	0.399	1	other
Agps	0.000842929	0.063361	0.231	0.143	1	other
Chrna1os	9.80023e-05	0.0633273	0.072	0.02	1	other
Cpne4	0.000677151	0.0632809	0.234	0.143	1	other
Mt1	0.00710884	0.0632733	0.585	0.463	1	other
Zbtb44	0.0047605	0.0632453	0.219	0.143	1	other
Tmem70	0.000216688	0.0632353	0.261	0.154	1	other
Rap2c	7.5459e-05	0.0631129	0.215	0.116	1	other
Dad1	0.000314684	0.0631104	0.513	0.351	1	other
Rps25	0.00112981	0.0630932	1	0.998	1	other
Flrt2	0.00286341	0.0630905	0.231	0.152	1	other
Tmx1	0.0355611	0.0630743	0.667	0.533	1	other
Itih3	0.000316271	0.06306	0.119	0.054	1	other
Rabggtb	0.00883163	0.0630355	0.489	0.354	1	other
Syngr3	0.00506422	0.0630294	0.773	0.655	1	other
Pcmtd1	0.00352954	0.0630259	0.519	0.383	1	other
Tecr	0.0240134	0.0629621	0.803	0.698	1	other
Gpi1	0.00962792	0.0628841	0.7	0.546	1	other
H2-D1	0.000355085	0.0628548	0.108	0.048	1	other
Cntn2	4.96689e-05	0.0627768	0.375	0.231	0.826143	other
Dock10	0.00011028	0.0627599	0.091	0.032	1	other
Usp30	0.0015767	0.062758	0.248	0.161	1	other
Kalrn	0.00311346	0.062692	0.562	0.426	1	other
Slc30a10	5.17597e-05	0.0626236	0.181	0.088	0.86066	other
Gdf11	0.000101005	0.0626219	0.207	0.111	1	other
Pyurf	0.00011504	0.0625689	0.151	0.073	1	other
Cep19	0.000207353	0.0625451	0.473	0.306	1	other
Wdfy3	0.00298581	0.0625097	0.591	0.442	1	other
Smpd1	0.00111488	0.0624823	0.314	0.202	1	other
Slc32a1	0.0109289	0.0624381	0.789	0.644	1	other
Cand1	0.0124624	0.0624071	0.545	0.431	1	other
Phf6	0.000979223	0.0623505	0.294	0.186	1	other
Snx12	0.00016907	0.0623331	0.156	0.077	1	other
Myrip	0.000508048	0.0622393	0.116	0.054	1	other
Rcbtb1	0.000575111	0.0620941	0.273	0.17	1	other
Atp1a2	0.00295358	0.0620537	0.207	0.129	1	other
Gapdh	0.0342231	0.0620399	0.713	0.576	1	other
Cox8a	0.0173527	0.0618635	0.998	0.986	1	other
Elovl6	0.00726304	0.0618077	0.407	0.297	1	other
Pgls	0.000322318	0.0617927	0.284	0.172	1	other
Pcdh1	0.000328292	0.0616205	0.199	0.111	1	other
Ulk1	6.69217e-05	0.0615695	0.319	0.193	1	other
Mturn	0.000804312	0.0615647	0.313	0.204	1	other
Xylt1	0.000434574	0.0615452	0.091	0.036	1	other
Eif3b	0.00512084	0.0614826	0.346	0.243	1	other
Hmgxb3	0.000240381	0.0614811	0.127	0.059	1	other
Tmem150c	0.000183717	0.0614343	0.241	0.138	1	other
Mtcl1	0.000151905	0.0613468	0.181	0.095	1	other
Minpp1	0.00261455	0.0613143	0.406	0.286	1	other
Pnkd	1.28432e-05	0.0612772	0.523	0.331	0.214956	other
Sema3c	0.00280346	0.0612481	0.053	0.018	1	other
Abr	0.0206138	0.061238	0.816	0.689	1	other
Igsf1	0.00136698	0.0611074	0.153	0.086	1	other
Polr3k	0.000529342	0.061045	0.395	0.259	1	other
Chuk	0.00185185	0.0610362	0.384	0.261	1	other
Adipor2	0.00114138	0.0609791	0.231	0.143	1	other
Kcnq2	0.00109056	0.0609519	0.676	0.515	1	other
Tmem160	0.000437074	0.0609404	0.226	0.132	1	other
4930447C04Rik	9.48368e-05	0.0609294	0.193	0.1	1	other
Scg5	0.00795374	0.0608773	0.646	0.501	1	other
Rab27a	0.000734335	0.0608541	0.225	0.134	1	other
Ensa	0.00694491	0.0608471	0.689	0.551	1	other
Abca3	0.000434448	0.0608399	0.357	0.234	1	other
Aar2	0.000124567	0.0608377	0.168	0.084	1	other
Zdhhc8	0.000993243	0.0607552	0.317	0.204	1	other
Qsox2	0.00295179	0.0606943	0.191	0.12	1	other
Ahcyl1	0.000540116	0.0606721	0.513	0.354	1	other
Nkiras1	0.0010873	0.0606648	0.327	0.213	1	other
Lyrm9	0.00558228	0.0606491	0.471	0.345	1	other
Usp14	0.00664256	0.0606415	0.573	0.424	1	other
Fgfr3	0.000190302	0.0606399	0.081	0.027	1	other
Mast3	0.00108106	0.060609	0.384	0.254	1	other
Tm7sf3	0.000228568	0.0605833	0.156	0.079	1	other
Ankrd10	0.00152275	0.060571	0.403	0.279	1	other
Cldn12	0.00125638	0.0604994	0.165	0.093	1	other
Srsf6	0.0275693	0.0604822	0.522	0.406	1	other
Afg3l2	7.66357e-05	0.0604595	0.219	0.116	1	other
Taf4	0.000336559	0.0602774	0.119	0.054	1	other
Arih1	0.000432738	0.0602488	0.362	0.234	1	other
Tspan6	0.00277843	0.0601792	0.377	0.261	1	other
Tmem43	0.000788359	0.060096	0.22	0.132	1	other
Nipa1	0.000120394	0.0600908	0.162	0.079	1	other
Ago3	0.0025248	0.0600252	0.34	0.236	1	other
Ccdc47	0.00344227	0.0599756	0.571	0.415	1	other
Rabgap1	0.00949284	0.0599669	0.565	0.415	1	other
Atxn7l3	0.00119947	0.059962	0.421	0.288	1	other
Ndufs4	0.00231314	0.0599329	0.443	0.315	1	other
D17H6S53E	0.00445134	0.0599077	0.127	0.073	1	other
Tesc	0.00238369	0.059896	0.165	0.098	1	other
Peg3	0.00119107	0.0598668	1	0.995	1	other
Flywch1	0.0236142	0.0597584	0.786	0.673	1	other
Fasn	0.000240265	0.0597325	0.42	0.277	1	other
Tti2	0.000144411	0.0594734	0.107	0.043	1	other
Gpd1l	0.00051077	0.0594579	0.319	0.202	1	other
Drg2	0.000404959	0.0593912	0.18	0.098	1	other
Nxph1	0.000794567	0.0593335	0.107	0.05	1	other
Gm10037	3.57695e-05	0.059322	0.122	0.048	0.59592	other
Cacul1	0.00802248	0.0593088	0.528	0.395	1	other
Cacna1d	0.00147858	0.0592894	0.185	0.109	1	other
Amy1	0.00652779	0.0592853	0.233	0.156	1	other
Zzef1	0.000663895	0.0592802	0.428	0.297	1	other
Trank1	0.00666853	0.0592641	0.51	0.379	1	other
Metap1d	0.000303328	0.0591973	0.237	0.138	1	other
Cds2	0.0194451	0.0591854	0.879	0.748	1	other
Ambra1	0.000585262	0.0591293	0.185	0.104	1	other
Mageh1	0.000867734	0.059102	0.36	0.24	1	other
Ret	0.000373576	0.0590929	0.098	0.041	1	other
Usp51	0.0108052	0.0590922	0.232	0.161	1	other
Ptrh1	2.19027e-05	0.0588383	0.059	0.009	0.365731	other
Znfx1	0.00254971	0.0588192	0.09	0.043	1	other
Gls	0.0139927	0.0587861	0.664	0.519	1	other
Cmtr1	0.00296766	0.0587794	0.333	0.227	1	other
Lamp2	0.000806932	0.0587686	0.176	0.1	1	other
Osbpl6	0.00209629	0.0587466	0.32	0.215	1	other
Srebf2	0.000994739	0.0587409	0.552	0.39	1	other
Lmbr1	0.00220285	0.0586914	0.294	0.193	1	other
Kif5a	0.0221838	0.0586817	0.8	0.678	1	other
Hsbp1	0.0171343	0.0586374	0.871	0.741	1	other
Rnf31	0.000541199	0.0586281	0.106	0.048	1	other
Slc35e4	0.000137154	0.0585861	0.104	0.041	1	other
Atp2a2	0.0506473	0.0585496	0.824	0.712	1	other
Zfp740	0.000629094	0.058537	0.35	0.227	1	other
Cdk2ap1	0.00118375	0.0585277	0.158	0.088	1	other
Arntl2	0.000295863	0.0585259	0.113	0.05	1	other
Usp22	0.0184196	0.0585085	0.917	0.778	1	other
Flywch2	0.00471655	0.0584935	0.267	0.184	1	other
Gng4	0.00543878	0.0584854	0.518	0.401	1	other
Aplp1	0.0706283	0.0584168	0.909	0.825	1	other
Slc16a1	8.0711e-05	0.0583536	0.107	0.041	1	other
Syt6	0.00842086	0.0583354	0.19	0.127	1	other
Ppia	0.0168433	0.0582853	0.946	0.884	1	other
Wnk3	0.0039541	0.0582563	0.31	0.213	1	other
Rgs11	0.000107522	0.0582539	0.183	0.093	1	other
Zfp667	0.0011646	0.0581909	0.301	0.2	1	other
Man2c1	0.000345538	0.0581562	0.18	0.098	1	other
Gng12	9.3248e-05	0.0581385	0.092	0.032	1	other
Mbtps1	0.000775583	0.0580692	0.32	0.204	1	other
Cmtm4	0.00072965	0.0580666	0.391	0.256	1	other
Sdk1	0.00076782	0.0580564	0.087	0.036	1	other
Tbk1	0.00113159	0.0580395	0.255	0.161	1	other
Kcnip4	0.00231897	0.0580133	0.21	0.134	1	other
Kcnmb4	7.57828e-05	0.0580016	0.18	0.088	1	other
Snx24	0.0010541	0.0579711	0.109	0.052	1	other
Tpp1	0.000615673	0.0579529	0.206	0.12	1	other
5031439G07Rik	8.42625e-05	0.0579233	0.392	0.243	1	other
Gpaa1	0.000228232	0.0578846	0.108	0.045	1	other
Airn	0.00020306	0.0577347	0.062	0.016	1	other
Klhl1	0.0112086	0.0577322	0.17	0.113	1	other
Tmem91	0.0168413	0.0576781	0.751	0.585	1	other
Rgs8	0.000544075	0.0576232	0.132	0.066	1	other
Whrn	0.00185415	0.0576163	0.105	0.052	1	other
Spire2	0.000148887	0.0575907	0.104	0.041	1	other
Baalc	0.000718402	0.0575491	0.339	0.222	1	other
Reep2	0.00178241	0.0575442	0.59	0.422	1	other
Ivd	0.000175845	0.0573886	0.243	0.136	1	other
C130060K24Rik	0.00248486	0.0572992	0.05	0.016	1	other
Tbcel	0.00435718	0.0572981	0.319	0.224	1	other
Doc2b	0.000287	0.0572696	0.231	0.134	1	other
Fbxo38	0.00401521	0.0571826	0.261	0.177	1	other
Acsl6	0.00204809	0.0571821	0.311	0.206	1	other
Rbms1	0.00168235	0.0570003	0.106	0.052	1	other
9330182L06Rik	0.0011785	0.0569422	0.288	0.188	1	other
Phtf1	0.000403381	0.056941	0.224	0.127	1	other
Cnot11	0.00406055	0.0567455	0.154	0.093	1	other
Mirg	0.0032983	0.056691	0.469	0.34	1	other
Nt5c2	0.00139268	0.0566842	0.286	0.184	1	other
Rps6ka2	0.00503498	0.0566799	0.368	0.256	1	other
Rassf5	0.000160995	0.0565817	0.216	0.12	1	other
D3Ertd751e	0.000896824	0.0565454	0.3	0.195	1	other
Sec61g	0.028247	0.0565038	0.854	0.753	1	other
Mobp	0.000568717	0.0564827	0.139	0.07	1	other
Ifngr2	0.00499049	0.0564379	0.279	0.188	1	other
Fry	0.0141756	0.0564072	0.679	0.526	1	other
Bap1	0.0013381	0.0563798	0.297	0.193	1	other
Chmp7	0.000618942	0.0563573	0.418	0.274	1	other
Dnajc10	0.0109915	0.0563166	0.429	0.32	1	other
Impdh1	0.00829637	0.0563114	0.154	0.098	1	other
Ppp1r12c	0.00259823	0.0563001	0.315	0.213	1	other
Fam135b	0.00129781	0.0562875	0.228	0.141	1	other
Nefm	0.00109789	0.0562837	0.157	0.088	1	other
Sdhc	0.00703903	0.056271	0.486	0.349	1	other
Lin37	0.00035652	0.0562488	0.228	0.132	1	other
Fgd3	0.000159367	0.05623	0.051	0.009	1	other
Mterf2	0.00193012	0.0561007	0.108	0.054	1	other
Trim32	0.00791905	0.0560643	0.607	0.456	1	other
Snrpc	0.00172162	0.0560385	0.222	0.136	1	other
Tubgcp3	0.000972918	0.0559779	0.249	0.154	1	other
Mid1ip1	0.000846002	0.0559396	0.398	0.268	1	other
Thoc1	0.000837636	0.0558988	0.254	0.156	1	other
Deptor	0.000148465	0.0557424	0.067	0.018	1	other
Galnt7	0.00046315	0.0556884	0.132	0.063	1	other
Focad	0.000449998	0.0556244	0.153	0.079	1	other
Glb1	0.00076042	0.055596	0.097	0.043	1	other
Gatad2a	0.00045552	0.0555236	0.207	0.12	1	other
Ppp1r9b	0.00422747	0.0554845	0.483	0.342	1	other
Acaca	0.00428436	0.0554427	0.425	0.308	1	other
Ube2e3	0.000317437	0.0554355	0.424	0.279	1	other
Ebp	0.000303955	0.0554047	0.085	0.032	1	other
Sobp	0.0111636	0.0553924	0.593	0.456	1	other
Yipf3	0.0011997	0.0553816	0.192	0.113	1	other
Tmcc1	0.00183692	0.0553347	0.544	0.385	1	other
Wbp1	0.00116421	0.05533	0.26	0.161	1	other
Erc1	0.00099884	0.0553294	0.357	0.238	1	other
Nol4l	0.013411	0.0552955	0.243	0.172	1	other
Mtor	0.0006659	0.0552823	0.296	0.186	1	other
Snx6	0.00334798	0.0552727	0.266	0.177	1	other
Fkbp4	0.0349519	0.0552424	0.536	0.417	1	other
Eif3k	0.00923211	0.0552423	0.875	0.753	1	other
Ap1s2	0.0142824	0.0552185	0.629	0.494	1	other
Tfrc	0.000187802	0.0551072	0.235	0.134	1	other
Lpcat4	0.000423999	0.055092	0.145	0.073	1	other
Taf10	0.00320838	0.0550613	0.32	0.218	1	other
Mettl27	0.00325707	0.0549917	0.105	0.054	1	other
Lpin1	0.00200424	0.0549185	0.398	0.281	1	other
Cpsf7	0.00411847	0.0549155	0.354	0.245	1	other
Atp6v1h	0.0172248	0.0549016	0.483	0.374	1	other
Megf9	0.00336989	0.0548985	0.332	0.224	1	other
Psmf1	0.0031273	0.0548627	0.179	0.111	1	other
Pomk	0.000708028	0.0547489	0.189	0.107	1	other
Phkb	0.000959898	0.0547484	0.164	0.091	1	other
Ndufb5	0.0280909	0.0547257	0.883	0.764	1	other
Stx1a	0.000115725	0.0546796	0.32	0.193	1	other
Eprs	0.00701298	0.0546629	0.328	0.231	1	other
Xrcc5	0.00293888	0.0546622	0.133	0.075	1	other
Ufsp1	0.000136026	0.0546503	0.157	0.077	1	other
Kctd10	0.000332855	0.0545838	0.244	0.143	1	other
Lhfpl4	0.00676462	0.0545739	0.683	0.537	1	other
Rpl11	0.0128183	0.054561	1	1	1	other
Trim24	0.000315891	0.0545441	0.194	0.107	1	other
Pld5	0.000963422	0.054533	0.113	0.054	1	other
Dennd5b	0.0416385	0.0544808	0.657	0.535	1	other
Zfp652	0.000712819	0.0544528	0.198	0.113	1	other
Mical3	0.0104612	0.0543859	0.514	0.385	1	other
Slc4a3	0.00289376	0.0543741	0.381	0.265	1	other
Diaph3	0.000305055	0.0543409	0.109	0.048	1	other
Adcy3	0.0015833	0.054329	0.283	0.186	1	other
Rtn4	0.0391886	0.0542939	0.87	0.776	1	other
Retreg1	0.00348699	0.0540993	0.468	0.329	1	other
Pdk1	0.00560139	0.0540867	0.343	0.24	1	other
Cnot7	0.00116519	0.0540734	0.6	0.426	1	other
Agpat3	0.0213807	0.0540663	0.428	0.331	1	other
Slc1a4	0.00975391	0.0540545	0.41	0.302	1	other
Lhfpl5	0.00135557	0.054009	0.121	0.061	1	other
Abca1	0.000106682	0.0539685	0.065	0.016	1	other
Baiap3	0.0263385	0.0539582	0.873	0.751	1	other
Cyc1	0.000874435	0.0539436	0.486	0.331	1	other
Fam196a	0.000166216	0.0538858	0.081	0.027	1	other
Mad2l1	4.41641e-05	0.0538479	0.056	0.009	0.734846	other
Vwa5b2	0.00379793	0.0537718	0.321	0.222	1	other
Tmem86a	0.000913184	0.0537641	0.093	0.041	1	other
Mapk8ip2	0.0417268	0.0537299	0.763	0.621	1	other
Tor1aip2	0.000451356	0.0537251	0.339	0.22	1	other
Gde1	0.0457409	0.0536971	0.501	0.39	1	other
Ran	0.00443546	0.0536939	0.832	0.683	1	other
Vps26b	0.00328629	0.0536645	0.387	0.265	1	other
Mib2	0.000872354	0.0535598	0.252	0.154	1	other
Itgb1	0.000546003	0.0533863	0.207	0.118	1	other
Baz2b	0.00185192	0.0533847	0.283	0.186	1	other
Prok2	0.00535584	0.0533704	0.253	0.17	1	other
Dhx35	0.00045215	0.0533626	0.062	0.018	1	other
Pbxip1	0.000627211	0.053318	0.159	0.084	1	other
Angptl6	8.92836e-05	0.0532939	0.171	0.084	1	other
Tmem167b	0.000592116	0.0532929	0.247	0.15	1	other
Klhl24	0.0154781	0.0532607	0.549	0.426	1	other
Mia3	0.00041825	0.0532502	0.468	0.308	1	other
Slit1	8.19988e-05	0.0532391	0.117	0.048	1	other
Hint1	0.018115	0.0532161	0.957	0.893	1	other
Pcbp3	0.00063969	0.0531938	0.219	0.129	1	other
Chmp3	0.000335354	0.0531794	0.525	0.367	1	other
Ddx27	0.00241486	0.0529225	0.146	0.084	1	other
Mbd5	0.00257143	0.0528489	0.359	0.247	1	other
Mtmr1	0.000369764	0.0527579	0.18	0.098	1	other
Hsd17b10	0.00141308	0.0527575	0.256	0.161	1	other
Pcid2	0.00011692	0.0527452	0.102	0.039	1	other
Tln2	0.0194608	0.0526142	0.371	0.283	1	other
Edem3	0.000693396	0.0525688	0.18	0.102	1	other
Tln1	0.00927425	0.0525529	0.476	0.349	1	other
Gemin7	0.00332487	0.0525517	0.437	0.306	1	other
Eif1ad	0.00106972	0.052548	0.212	0.125	1	other
Mgat1	0.00476709	0.0525351	0.317	0.218	1	other
Siae	0.00750985	0.0525062	0.124	0.075	1	other
Dtd1	0.00804124	0.0524409	0.445	0.324	1	other
Zranb2	0.0311906	0.052413	0.836	0.719	1	other
Foxk2	0.00138329	0.0523658	0.309	0.204	1	other
Gadd45g	0.00560477	0.0523545	0.131	0.077	1	other
Enox2	0.000223363	0.0523189	0.165	0.084	1	other
Papss1	0.00657186	0.052292	0.239	0.161	1	other
Ttc13	0.000784254	0.0522778	0.284	0.179	1	other
Zfp622	0.0123094	0.0522747	0.544	0.408	1	other
Vamp4	0.00629673	0.0522433	0.571	0.426	1	other
Immt	0.00547465	0.0521353	0.393	0.277	1	other
Mrap2	0.192959	0.0520771	0.327	0.279	1	other
Vps13d	0.00452326	0.0520094	0.243	0.166	1	other
Zfp157	0.0169426	0.0519541	0.458	0.347	1	other
Ghr	0.00937556	0.0519268	0.091	0.05	1	other
Haus8	0.00314115	0.0518966	0.17	0.102	1	other
Rbm11	0.000865652	0.0518831	0.11	0.052	1	other
Urgcp	0.00119142	0.0518513	0.311	0.202	1	other
Smap2	0.0195384	0.0518437	0.568	0.438	1	other
Tacc2	0.015835	0.0518156	0.447	0.329	1	other
Mrpl35	0.000126399	0.0518131	0.234	0.129	1	other
Rab3ip	0.000327447	0.0517883	0.12	0.054	1	other
Vps13c	0.00476523	0.0517803	0.327	0.229	1	other
B4galt5	0.00800369	0.0517637	0.337	0.24	1	other
6430548M08Rik	0.00900466	0.0517605	0.508	0.381	1	other
Eps15	0.00431055	0.051723	0.406	0.288	1	other
Gm32014	0.00387086	0.0517176	0.071	0.032	1	other
C78859	0.00139703	0.0516728	0.172	0.1	1	other
Gtf3c6	0.00112742	0.0516314	0.191	0.111	1	other
Hdac2	0.0119245	0.0516193	0.474	0.354	1	other
Nefh	0.00117217	0.0516094	0.195	0.116	1	other
Parp8	0.00153109	0.0515302	0.172	0.1	1	other
Tmem186	0.00143248	0.0515229	0.162	0.091	1	other
Rbfox3	0.029776	0.0514948	0.719	0.603	1	other
Jpt1	0.0423714	0.0514706	0.623	0.492	1	other
Arpc1a	0.0612481	0.0514632	0.667	0.528	1	other
Tsc2	0.001527	0.051424	0.18	0.107	1	other
Nrip2	0.00737148	0.0514174	0.289	0.202	1	other
Hap1	0.0410734	0.0513674	0.996	0.982	1	other
Faap100	0.00349576	0.0513589	0.178	0.109	1	other
Myl6b	5.89042e-05	0.051191	0.064	0.014	0.978634	other
Irak1	0.0118557	0.0511847	0.422	0.311	1	other
Fam20b	0.0305206	0.0511141	0.53	0.404	1	other
Szt2	0.00170039	0.0510942	0.124	0.066	1	other
Gabrq	0.0668271	0.0510355	0.672	0.585	1	other
Mgea5	0.00417919	0.0510328	0.64	0.476	1	other
Scn1a	0.00579509	0.050971	0.326	0.227	1	other
Neu1	0.00886103	0.0509483	0.267	0.184	1	other
Sesn2	0.000538741	0.0509155	0.104	0.045	1	other
Tgfbrap1	1.41843e-05	0.0508888	0.2	0.098	0.237346	other
Unc45a	0.000249156	0.0508689	0.185	0.098	1	other
Dvl1	0.00410151	0.0508615	0.279	0.188	1	other
Cetn4	0.0096734	0.0508465	0.246	0.17	1	other
9930104L06Rik	0.000261912	0.0507973	0.11	0.048	1	other
Prr14	0.000797874	0.0507755	0.147	0.077	1	other
Cacng4	0.0113104	0.0507653	0.452	0.338	1	other
Pno1	0.000892529	0.0507592	0.113	0.054	1	other
Atxn2	0.00506741	0.0507365	0.551	0.404	1	other
Trmt13	0.00163049	0.0507353	0.213	0.129	1	other
Pitpnm3	0.0009576	0.0507099	0.218	0.132	1	other
Scap	0.00232602	0.050683	0.204	0.125	1	other
Slc22a17	0.0570139	0.0506816	0.945	0.839	1	other
Pomgnt1	0.00463366	0.0506518	0.269	0.179	1	other
Plppr3	0.00840676	0.0505741	0.476	0.349	1	other
Cep104	0.00109363	0.05057	0.216	0.129	1	other
Tmem132a	0.00430887	0.0505557	0.238	0.156	1	other
H2afx	0.000210665	0.0505125	0.245	0.138	1	other
0610037L13Rik	0.00173099	0.0505008	0.197	0.118	1	other
Uqcrc2	0.00416902	0.0504399	0.414	0.293	1	other
Numa1	0.000690558	0.0504243	0.424	0.286	1	other
Rara	6.67887e-05	0.050417	0.071	0.018	1	other
Atp6v0a1	0.0229214	0.0504002	0.747	0.612	1	other
Naaa	0.00250659	0.0503995	0.269	0.177	1	other
Arhgap32	0.0166028	0.0503951	0.414	0.313	1	other
Fjx1	0.00297214	0.0503752	0.094	0.045	1	other
Gm26652	0.00145336	0.0503478	0.059	0.02	1	other
Mtch1	0.126	0.0503195	0.913	0.81	1	other
Rtca	0.00214625	0.0503088	0.225	0.141	1	other
Lrrc4b	0.0219074	0.0502775	0.648	0.524	1	other
Cyld	0.0111798	0.0502766	0.668	0.501	1	other
Rpf1	0.000800195	0.0502456	0.153	0.082	1	other
Psd	0.00891559	0.0501854	0.545	0.404	1	other
Rps15	0.00775056	0.0501833	1	0.998	1	other
Tor1aip1	0.00910931	0.0501758	0.168	0.109	1	other
Lrp10	0.000717318	0.0501248	0.098	0.043	1	other
Ncor1	0.108818	0.0500243	0.746	0.626	1	other
Mrps36	0.0043736	0.0499732	0.374	0.261	1	other
Top2b	0.00192974	0.049935	0.444	0.313	1	other
Zfp711	0.000598582	0.0499003	0.103	0.045	1	other
Smox	0.000127814	0.049868	0.098	0.036	1	other
Narfl	0.00701326	0.0498005	0.096	0.052	1	other
Lamp5	0.00521305	0.0497487	0.135	0.079	1	other
Zscan26	0.00707008	0.0497422	0.485	0.365	1	other
Mrpl52	0.0118427	0.0497055	0.855	0.714	1	other
Rbms3	0.0238899	0.0496671	0.359	0.27	1	other
Tmed5	0.00311875	0.0496607	0.239	0.156	1	other
Fbxl18	0.0022159	0.0496236	0.162	0.095	1	other
Cyfip2	0.0379969	0.0495853	0.829	0.683	1	other
Fdps	0.00108061	0.0495776	0.195	0.116	1	other
Esr1	0.011794	0.0495279	0.842	0.737	1	other
H13	0.0135947	0.0494873	0.505	0.372	1	other
Bbs7	0.000412877	0.0494845	0.119	0.054	1	other
Mrpl4	0.00462591	0.0494293	0.261	0.175	1	other
Disp3	0.00555016	0.0494194	0.165	0.102	1	other
Atp2b2	0.0147483	0.0493925	0.591	0.463	1	other
Farsb	0.00485836	0.0493918	0.288	0.195	1	other
Ldhd	0.000542058	0.0493764	0.099	0.043	1	other
Nr2f1	0.0245368	0.0492737	0.12	0.077	1	other
Fam8a1	0.0751195	0.0492189	0.688	0.546	1	other
Ermp1	0.00337556	0.0492102	0.16	0.095	1	other
Myo10	0.00388454	0.0492064	0.141	0.082	1	other
Atp5b	0.00695061	0.0492027	0.796	0.658	1	other
Gal	0.0147292	0.0491895	0.285	0.206	1	other
Crtac1	0.00166353	0.0491057	0.191	0.113	1	other
Zfp651	0.00271775	0.0490899	0.191	0.116	1	other
Gad1	0.116818	0.0490649	0.857	0.776	1	other
Pcbd1	0.0536443	0.0490312	0.624	0.506	1	other
Tmem8b	0.00637855	0.0490161	0.346	0.245	1	other
Lmtk3	0.00538383	0.0489994	0.447	0.324	1	other
Cntn1	0.0393483	0.0489957	0.901	0.805	1	other
Nrf1	0.000384565	0.0489433	0.134	0.066	1	other
Ghitm	0.0199456	0.048943	0.636	0.488	1	other
Tbc1d22b	0.0115096	0.0489063	0.219	0.15	1	other
1110065P20Rik	0.0342685	0.0488979	0.697	0.556	1	other
Med22	0.00368994	0.0487854	0.157	0.093	1	other
Lamp1	0.01435	0.0487758	0.586	0.449	1	other
Rad17	0.00277929	0.0487631	0.201	0.125	1	other
Capn7	0.0062016	0.0487605	0.294	0.2	1	other
Bms1	0.0019957	0.048705	0.134	0.073	1	other
Ddx28	0.00212755	0.0486776	0.068	0.027	1	other
Ap2a1	0.00809084	0.0486769	0.403	0.29	1	other
Nckipsd	0.000450033	0.0486184	0.271	0.163	1	other
Kcnh2	0.00673951	0.0486075	0.148	0.091	1	other
Chn1	0.0333942	0.0486072	0.608	0.485	1	other
Ggt7	0.000230296	0.0486032	0.258	0.152	1	other
Pgbd5	0.0110958	0.0485784	0.208	0.143	1	other
Uqcrfs1	0.0181387	0.0485777	0.626	0.488	1	other
Sf3a1	0.0120517	0.0485697	0.328	0.234	1	other
Arfgef1	0.012751	0.0484982	0.44	0.331	1	other
Nucb1	0.0038416	0.0484815	0.28	0.188	1	other
Lrrc40	0.000420085	0.0484774	0.148	0.075	1	other
Serinc3	0.00141642	0.0484556	0.478	0.329	1	other
Calr	0.0499801	0.048389	0.799	0.696	1	other
Pex3	0.000279049	0.0483856	0.206	0.116	1	other
Neto2	0.019784	0.0483779	0.226	0.161	1	other
Btbd2	0.0221568	0.0483434	0.301	0.222	1	other
Rps18	0.0144988	0.0483406	0.999	1	1	other
Rps11	0.0081617	0.0483359	0.999	1	1	other
Klf16	0.000910838	0.0482921	0.149	0.079	1	other
Fam98a	0.00096402	0.0482916	0.167	0.093	1	other
Cbl	0.0125469	0.0482725	0.433	0.322	1	other
Txnl1	0.00454773	0.0482554	0.459	0.324	1	other
Gm3636	0.00320969	0.0481915	0.082	0.039	1	other
Parl	0.00916872	0.0481689	0.204	0.136	1	other
Wsb2	0.0639266	0.0481587	0.513	0.413	1	other
Msantd4	0.00936034	0.0481586	0.457	0.333	1	other
Cdc42bpb	0.00221016	0.0480938	0.386	0.261	1	other
Trnp1	0.000243374	0.0480219	0.217	0.122	1	other
Rfk	0.00216911	0.0480083	0.419	0.283	1	other
Paqr7	0.000508656	0.0480081	0.308	0.195	1	other
Fam222a	0.00038077	0.0480069	0.146	0.073	1	other
Fsd1l	0.00764772	0.0479511	0.38	0.27	1	other
Chp1	0.0488909	0.0479234	0.71	0.592	1	other
Smim20	0.00730107	0.0479171	0.283	0.197	1	other
Serpinb6a	0.00239273	0.0479036	0.16	0.093	1	other
Ttc1	0.00345223	0.0478957	0.378	0.261	1	other
1110051M20Rik	0.000891867	0.0478636	0.378	0.254	1	other
Rgs7	0.0106821	0.0477447	0.256	0.179	1	other
Nol12	0.00237336	0.0477164	0.301	0.202	1	other
Rps6	0.0187447	0.0476883	1	1	1	other
Ccdc136	0.000769323	0.0476346	0.378	0.249	1	other
Rapgef5	0.00377016	0.047624	0.132	0.075	1	other
Pea15a	0.055673	0.0476075	0.919	0.839	1	other
Msto1	0.00214183	0.0475542	0.113	0.059	1	other
Rgmb	0.00690802	0.0475315	0.368	0.268	1	other
Eps8	0.00490159	0.0475228	0.09	0.045	1	other
Pef1	0.00229028	0.0474805	0.238	0.15	1	other
Mvk	0.00203928	0.0474693	0.079	0.034	1	other
Atp5a1	0.0383499	0.0474158	0.834	0.726	1	other
Apeh	0.000985251	0.0474137	0.12	0.059	1	other
Uros	0.0026835	0.0473795	0.167	0.1	1	other
Dmxl1	0.00177307	0.0472689	0.349	0.231	1	other
Vat1l	0.327238	0.0472068	0.788	0.748	1	other
Nt5m	0.0036902	0.047147	0.281	0.188	1	other
4933431E20Rik	0.00447785	0.0470982	0.257	0.172	1	other
Pla2g6	0.00591868	0.0470417	0.091	0.048	1	other
Trpm2	0.0012108	0.0470285	0.163	0.091	1	other
Tmem147	0.00664758	0.0469796	0.377	0.268	1	other
Smad5	0.0021763	0.0469773	0.305	0.202	1	other
Gng13	0.130788	0.0469542	0.392	0.322	1	other
Tsr3	0.00187817	0.0469176	0.208	0.127	1	other
Mesd	0.0739532	0.0468967	0.575	0.467	1	other
Chac2	0.00302288	0.0468497	0.13	0.073	1	other
Psmb1	0.175436	0.0468391	0.817	0.748	1	other
Ciao1	0.000415264	0.0468159	0.224	0.129	1	other
Micu3	0.0412514	0.0467988	0.802	0.692	1	other
Pttg1ip	0.00175682	0.0467751	0.138	0.075	1	other
Hmg20b	0.000761612	0.0467074	0.048	0.011	1	other
Rufy3	0.0687813	0.04668	0.915	0.85	1	other
Hdac6	0.00147466	0.0466534	0.208	0.127	1	other
Pak1ip1	0.001757	0.0466504	0.311	0.204	1	other
Hectd3	0.00167829	0.0466329	0.238	0.147	1	other
Slc25a4	0.113798	0.0466302	0.978	0.966	1	other
Tars2	0.00238836	0.0466246	0.129	0.07	1	other
Zfp940	0.00612181	0.0466235	0.069	0.032	1	other
Cd151	0.00377033	0.0465931	0.181	0.113	1	other
Emc4	0.00808428	0.046572	0.324	0.229	1	other
Pigg	0.00245105	0.0465531	0.075	0.032	1	other
Zdhhc17	0.00858888	0.0465409	0.465	0.347	1	other
Rps7	0.0266597	0.0465049	1	1	1	other
Adpgk	0.000642099	0.0465045	0.17	0.093	1	other
Shh	0.00716164	0.0465043	0.087	0.045	1	other
Taf1	0.0102924	0.0464708	0.422	0.308	1	other
Uqcrq	0.0470428	0.0464663	0.788	0.667	1	other
Relt	0.00261731	0.0464581	0.162	0.095	1	other
Ergic1	0.0147387	0.0464328	0.604	0.46	1	other
Paqr4	0.0017477	0.0463869	0.132	0.07	1	other
Vldlr	0.000593328	0.0463857	0.336	0.215	1	other
Tm9sf3	0.0162881	0.0463708	0.632	0.483	1	other
Idh3a	0.0156822	0.0463567	0.627	0.481	1	other
Erlin2	0.00036767	0.0463389	0.371	0.238	1	other
Tango2	0.0398731	0.0463035	0.537	0.413	1	other
Slc8a3	0.00241526	0.0462481	0.183	0.109	1	other
Ppp2r5a	0.00135196	0.0461937	0.098	0.045	1	other
Ubxn2b	0.00100236	0.0461876	0.273	0.17	1	other
Phc3	0.0033968	0.0461752	0.379	0.259	1	other
Chchd5	0.0139237	0.0461461	0.23	0.159	1	other
Snx17	0.00135879	0.0461428	0.337	0.224	1	other
Ecd	0.00507777	0.0461168	0.238	0.156	1	other
Zfp446	0.00108218	0.0460972	0.141	0.075	1	other
Stxbp5	0.00163161	0.0460805	0.406	0.277	1	other
B4galt2	0.00103924	0.0460199	0.293	0.188	1	other
Cadm2	0.045405	0.0460094	0.606	0.483	1	other
Klhl22	0.00445277	0.0459805	0.355	0.247	1	other
Calcoco1	0.00432421	0.0459768	0.227	0.147	1	other
Rpl36a-ps1	0.00498238	0.0459738	0.255	0.17	1	other
Hunk	0.0219617	0.0459618	0.103	0.063	1	other
Agtpbp1	0.0192599	0.0459609	0.503	0.372	1	other
Ptk2	0.00380686	0.0459227	0.26	0.17	1	other
Map1b	0.0437496	0.0458993	0.994	0.973	1	other
Nampt	0.0016559	0.0458878	0.28	0.177	1	other
Mrpl30	0.0320284	0.0458619	0.687	0.544	1	other
St8sia6	0.000154806	0.0458467	0.055	0.011	1	other
Rpl30	0.0208816	0.0457982	0.997	0.986	1	other
Mcrip1	0.00892808	0.0457955	0.653	0.494	1	other
Kit	0.0149851	0.0457825	0.07	0.036	1	other
Babam2	0.00585035	0.0457667	0.149	0.088	1	other
Gucy1b1	0.00860665	0.0457336	0.373	0.27	1	other
Armc6	0.00210194	0.0457133	0.161	0.093	1	other
Pcyt1a	0.00719462	0.045683	0.145	0.088	1	other
Clk3	0.00334582	0.0456641	0.286	0.188	1	other
Dennd6b	0.00173687	0.0456594	0.261	0.163	1	other
Ubac2	0.00333048	0.0456266	0.27	0.177	1	other
Mettl7a1	0.00127327	0.0455544	0.145	0.077	1	other
Ctnna1	0.00385187	0.0455431	0.108	0.057	1	other
Wdr83os	0.0228217	0.045536	0.401	0.304	1	other
Nfkbib	0.00417783	0.0455249	0.109	0.059	1	other
Hbb-bs	0.0011639	0.0454864	0.05	0.014	1	other
Pigb	0.000767194	0.0454704	0.102	0.045	1	other
P4hb	0.00693867	0.0454675	0.503	0.354	1	other
Tmem130	0.0806329	0.0454436	0.997	0.98	1	other
Mmp15	0.00107945	0.0454307	0.072	0.027	1	other
Rsl1d1	0.0291031	0.0454217	0.364	0.272	1	other
Lemd2	0.00518184	0.0454147	0.165	0.102	1	other
Zfp668	0.0073656	0.0454038	0.109	0.061	1	other
Ubxn8	0.00190079	0.0453985	0.09	0.041	1	other
Prpsap2	0.0189332	0.0453404	0.242	0.175	1	other
Cfap36	0.00630989	0.0453371	0.457	0.331	1	other
Atf7ip	0.000609139	0.0453283	0.352	0.229	1	other
Hcfc1r1	0.0575044	0.0452752	0.56	0.451	1	other
Prpf40b	0.00471934	0.0452669	0.273	0.181	1	other
Rev3l	0.0119394	0.0452364	0.449	0.329	1	other
Aars	0.00299075	0.0451965	0.275	0.181	1	other
Atg12	0.00477854	0.0451839	0.303	0.206	1	other
E130309D02Rik	0.00369488	0.0451533	0.126	0.07	1	other
Hgsnat	0.0130673	0.0451199	0.133	0.084	1	other
Cab39l	0.00619144	0.0450842	0.242	0.161	1	other
Marc2	0.00590805	0.0450201	0.161	0.1	1	other
Spata6	0.00126936	0.0450137	0.05	0.014	1	other
Creld1	0.00217179	0.0449587	0.37	0.252	1	other
Atp7a	0.000501812	0.0449418	0.054	0.014	1	other
Mpi	0.0075454	0.0449308	0.103	0.057	1	other
Fam183b	0.0019695	0.0449048	0.253	0.159	1	other
Mex3c	0.00462072	0.0449032	0.112	0.061	1	other
Mrps24	0.0221573	0.0448904	0.516	0.397	1	other
Qrfpr	0.00104778	0.0448838	0.029	0.002	1	other
Sstr1	0.000146435	0.0448478	0.042	0.005	1	other
Epb41l3	0.072093	0.0448212	0.612	0.503	1	other
Snupn	0.00210186	0.0448162	0.062	0.023	1	other
Itgav	0.00214929	0.0448125	0.062	0.023	1	other
Maz	0.0306857	0.0447991	0.425	0.315	1	other
Rbm43	0.000781101	0.0446934	0.119	0.057	1	other
Brwd1	0.00938646	0.0446723	0.525	0.383	1	other
Lars	0.00583038	0.0446634	0.159	0.098	1	other
Lifr	0.000158922	0.0446304	0.075	0.023	1	other
Htr7	0.000255404	0.0446173	0.072	0.023	1	other
Kcnc1	0.0743183	0.0444754	0.633	0.524	1	other
Csgalnact1	0.00159478	0.0444687	0.049	0.014	1	other
Cnn3	0.00102194	0.0444506	0.058	0.018	1	other
Lactb2	0.000657318	0.0443976	0.049	0.011	1	other
Metap1	0.0031893	0.0443831	0.369	0.252	1	other
Ctsa	0.0263948	0.0443445	0.158	0.109	1	other
Amfr	0.00508694	0.0443293	0.478	0.349	1	other
Tspan33	0.00350825	0.0443053	0.248	0.163	1	other
Abcf3	0.000289341	0.0442812	0.231	0.134	1	other
Ctxn2	0.127726	0.0442514	0.651	0.556	1	other
Ogfod1	0.0348084	0.0442393	0.572	0.444	1	other
Vti1a	0.0052737	0.044198	0.222	0.143	1	other
Ubr7	0.00337959	0.0441936	0.197	0.122	1	other
Fkrp	0.000600387	0.0441813	0.306	0.19	1	other
Nipsnap2	0.00493204	0.0441262	0.351	0.243	1	other
Vac14	0.00113935	0.044113	0.125	0.063	1	other
Exoc7	0.00599726	0.0441087	0.147	0.088	1	other
Xab2	0.00212281	0.0440963	0.105	0.052	1	other
Ik	0.00217607	0.0440132	0.371	0.254	1	other
Mvd	0.00028924	0.043995	0.076	0.025	1	other
Slc39a1	0.000317839	0.0439928	0.117	0.052	1	other
Coq9	0.00138669	0.0439884	0.231	0.143	1	other
Mnt	0.00199363	0.0439565	0.206	0.125	1	other
Dusp6	0.000884775	0.0439504	0.063	0.02	1	other
Scamp3	0.00107629	0.0439076	0.202	0.118	1	other
Fgf12	0.0709512	0.0438795	0.378	0.295	1	other
Fhl2	0.00168096	0.0438787	0.052	0.016	1	other
Tmem246	0.00337903	0.0438728	0.408	0.281	1	other
Snca	0.225926	0.0438536	0.361	0.313	1	other
Pqbp1	0.000963933	0.043736	0.235	0.143	1	other
Fkbp1b	0.000887651	0.0437358	0.167	0.093	1	other
Dhcr24	0.00381253	0.0436438	0.245	0.163	1	other
Prkcsh	0.00234631	0.043623	0.351	0.234	1	other
Ankrd13c	0.00272737	0.0436154	0.398	0.277	1	other
Sec24a	0.00333557	0.0436116	0.271	0.177	1	other
Gas2	0.00828097	0.0436076	0.083	0.043	1	other
D830030K20Rik	0.00612606	0.043576	0.11	0.061	1	other
mt-Cytb	0.0159974	0.0435572	1	1	1	other
Hivep2	0.00266621	0.0435292	0.222	0.138	1	other
Nsmce2	0.00544243	0.0435165	0.237	0.156	1	other
Sema3f	0.000755564	0.0434998	0.098	0.043	1	other
Slmap	0.0053847	0.043497	0.271	0.186	1	other
Nelfb	0.0168914	0.0434734	0.279	0.2	1	other
Csmd2	0.00531567	0.0434151	0.28	0.193	1	other
Gas2l1	0.00848721	0.0434057	0.179	0.116	1	other
Txnrd1	0.00415872	0.0433976	0.353	0.243	1	other
Fuca1	0.0065323	0.0433961	0.195	0.127	1	other
Tmem129	0.000152303	0.0433575	0.124	0.054	1	other
Bax	0.0308247	0.0433548	0.446	0.338	1	other
Limk1	0.00114878	0.0433207	0.306	0.195	1	other
Tmx3	0.00227378	0.0432934	0.44	0.302	1	other
Mlf2	0.0489313	0.043282	0.748	0.596	1	other
Rnf19a	0.00448555	0.0432744	0.137	0.079	1	other
Rad21	0.00377465	0.043233	0.56	0.408	1	other
Gm45051	0.00496971	0.0431892	0.123	0.07	1	other
Rnf168	0.0291981	0.0431691	0.225	0.161	1	other
A830036E02Rik	0.00149906	0.0431575	0.032	0.005	1	other
Extl2	0.00992609	0.043126	0.357	0.259	1	other
Npy1r	0.019713	0.0431198	0.258	0.188	1	other
Caskin1	0.00667721	0.0431095	0.427	0.304	1	other
Cdc42bpa	0.0221688	0.043097	0.618	0.469	1	other
Pak4	0.00255949	0.0430966	0.075	0.032	1	other
Sema4f	0.00306045	0.0430843	0.279	0.181	1	other
Sucla2	0.00264772	0.0430745	0.523	0.374	1	other
Lmtk2	0.00491413	0.0430728	0.229	0.15	1	other
Mavs	0.00221456	0.0430327	0.098	0.048	1	other
Sdf2	0.0108544	0.0430304	0.494	0.37	1	other
Plch1	0.0074604	0.0430158	0.052	0.02	1	other
Fah	0.00154933	0.0429886	0.067	0.025	1	other
Cacna2d1	0.00515568	0.0429886	0.398	0.281	1	other
Ccdc97	0.00129959	0.0429546	0.233	0.145	1	other
Acsl1	0.00674657	0.0429129	0.276	0.188	1	other
E2f6	0.00851382	0.0429067	0.224	0.15	1	other
Zfp827	0.0051037	0.0428543	0.166	0.102	1	other
Timm8b	0.0685836	0.0428212	0.916	0.816	1	other
Zfp956	0.0040017	0.0428094	0.149	0.088	1	other
Nkap	0.00255608	0.0428003	0.194	0.118	1	other
Snta1	0.000629839	0.042773	0.09	0.036	1	other
Ormdl3	0.00418127	0.0427648	0.387	0.265	1	other
Hibadh	0.00342442	0.0427524	0.252	0.163	1	other
Kcnf1	0.00673429	0.0427446	0.136	0.082	1	other
Leprot	0.00382435	0.0427385	0.144	0.084	1	other
Osbp	0.0034153	0.0427331	0.235	0.15	1	other
Tmed4	0.00198607	0.0427239	0.527	0.365	1	other
Socs7	0.00488316	0.0426927	0.392	0.277	1	other
Arl5a	0.0222726	0.0426871	0.545	0.415	1	other
Eif3i	0.022633	0.0426847	0.626	0.478	1	other
Dbi	0.00103672	0.0426692	0.227	0.136	1	other
Ablim3	0.0272768	0.0426673	0.257	0.188	1	other
Lrrtm3	0.00892332	0.0426491	0.409	0.306	1	other
Man1a2	0.00931829	0.0426118	0.486	0.351	1	other
Ergic2	0.00116719	0.0426032	0.394	0.263	1	other
Cyb5r4	0.0125764	0.0426014	0.168	0.111	1	other
Cdh24	0.0115182	0.042586	0.106	0.061	1	other
Zfp369	0.000559386	0.0425749	0.156	0.082	1	other
Ssh3	0.0026354	0.0425638	0.164	0.098	1	other
Fig4	0.00415221	0.0425625	0.078	0.036	1	other
Oxtr	0.000383815	0.0425621	0.028	0	1	other
Tfdp2	0.00413279	0.0425165	0.158	0.095	1	other
Tlnrd1	0.000694512	0.0425163	0.176	0.098	1	other
Gdap1l1	5.92516e-05	0.0424794	0.312	0.188	0.984347	other
Plxnc1	0.0263797	0.0424778	0.562	0.442	1	other
Bcam	0.00323618	0.0424536	0.131	0.073	1	other
Capza1	0.0133563	0.0424399	0.456	0.34	1	other
Pym1	0.0021705	0.0423903	0.136	0.075	1	other
Insig2	0.00595103	0.0423758	0.455	0.324	1	other
6430571L13Rik	0.000431823	0.0423387	0.042	0.007	1	other
Selenot	0.00781108	0.0423235	0.706	0.56	1	other
Srd5a3	0.000256797	0.0422781	0.077	0.025	1	other
Efnb1	0.00523707	0.0422702	0.158	0.095	1	other
Rab10os	0.00741257	0.042242	0.289	0.2	1	other
Slain1	0.00127634	0.0422338	0.163	0.091	1	other
Psen1	0.00080062	0.0422209	0.218	0.129	1	other
Per1	0.0179161	0.0422126	0.154	0.102	1	other
Polr3c	0.0125152	0.0422108	0.132	0.082	1	other
Tapbp	0.00117846	0.0421807	0.15	0.082	1	other
Stim2	0.0131797	0.0421137	0.254	0.179	1	other
Ganc	0.00850859	0.0420507	0.073	0.036	1	other
Arfgef3	0.126182	0.0420413	0.869	0.769	1	other
Slc1a3	0.0174247	0.0420238	0.094	0.054	1	other
Setd3	0.0623143	0.0419979	0.552	0.44	1	other
Hic2	0.00114918	0.0419822	0.099	0.045	1	other
4930452B06Rik	0.000957719	0.0419801	0.072	0.027	1	other
Sowahc	0.0023843	0.0419689	0.098	0.048	1	other
Gm30025	0.00367057	0.0419671	0.133	0.075	1	other
Fam78b	0.00368492	0.0418955	0.135	0.077	1	other
Gm28884	0.00149328	0.0418908	0.032	0.005	1	other
Mfn2	0.0153518	0.0418781	0.522	0.395	1	other
Gm16701.1	0.00168837	0.0418764	0.08	0.034	1	other
Cthrc1	0.00830466	0.041786	0.178	0.116	1	other
Slbp	0.00113188	0.0417493	0.4	0.268	1	other
Abhd17b	0.00248489	0.041749	0.315	0.211	1	other
Necab3	0.0187701	0.0417085	0.111	0.068	1	other
Prkab2	0.00207623	0.0417079	0.201	0.122	1	other
Pomgnt2	0.00320909	0.0416955	0.309	0.206	1	other
Mcrs1	0.00232349	0.0416624	0.131	0.07	1	other
Arhgap21	0.0116141	0.0416208	0.299	0.211	1	other
Rps27a	0.022521	0.0416136	0.999	1	1	other
Heatr1	0.00221305	0.0415875	0.065	0.025	1	other
Ncapd2	0.00113591	0.0415834	0.068	0.025	1	other
Zfp777	0.00781174	0.0415638	0.093	0.05	1	other
Lipt1	0.00132135	0.0415448	0.06	0.02	1	other
Cotl1	0.00547953	0.0414442	0.441	0.315	1	other
Tmem178	0.00112387	0.0414189	0.046	0.011	1	other
Pdia6	0.00728234	0.0414055	0.446	0.327	1	other
Gga3	0.0125049	0.0414021	0.248	0.172	1	other
Smoc1	0.00284644	0.0413823	0.103	0.052	1	other
Spcs3	0.0107307	0.0413543	0.251	0.17	1	other
Mtfr1l	0.00651517	0.0413498	0.286	0.197	1	other
Gatd1	0.00772703	0.0413496	0.233	0.156	1	other
Chrna3	0.00135946	0.041324	0.071	0.027	1	other
Cnpy3	0.0418235	0.0413063	0.296	0.224	1	other
Cyb5r3	0.00987508	0.0413017	0.451	0.324	1	other
Dhrs7b	0.00824534	0.0412834	0.08	0.041	1	other
Rps6kb2	0.00372651	0.0412476	0.197	0.122	1	other
Ern2	0.00398269	0.0412311	0.058	0.023	1	other
Slitrk4	0.00731707	0.0412281	0.256	0.175	1	other
Rap2a	0.00914288	0.0412196	0.417	0.302	1	other
Zdhhc18	0.00628067	0.0411782	0.127	0.075	1	other
Asb1	0.00693621	0.0411753	0.255	0.172	1	other
Nmnat2	0.0296212	0.0411315	0.661	0.537	1	other
Cacna2d3	0.0233204	0.0411059	0.042	0.018	1	other
Erf	0.00141766	0.0410322	0.06	0.02	1	other
Cd59a	0.011215	0.0410186	0.166	0.109	1	other
Arsb	0.00251045	0.0409924	0.434	0.299	1	other
Npy5r	0.00907194	0.0409868	0.164	0.104	1	other
Sgsm1	0.0348157	0.0409742	0.728	0.576	1	other
Uvssa	0.00554344	0.0409708	0.215	0.138	1	other
Cttnbp2nl	0.00328108	0.0409368	0.08	0.036	1	other
Maea	0.0066781	0.0409234	0.44	0.315	1	other
Cops3	0.00505023	0.0408957	0.24	0.156	1	other
Ifitm10	0.00199363	0.0408424	0.178	0.104	1	other
Gsg1l	0.000297849	0.0408111	0.072	0.023	1	other
Zfp617	0.00149135	0.0407923	0.272	0.172	1	other
Nup93	0.0002694	0.0407793	0.053	0.011	1	other
Ssr2	0.00325534	0.040771	0.33	0.22	1	other
Dctn1	0.0237999	0.0407424	0.685	0.526	1	other
Spred3	0.0160178	0.0407389	0.184	0.125	1	other
Rab22a	0.00708444	0.0407238	0.307	0.213	1	other
Tbc1d8	0.00630019	0.0407112	0.092	0.048	1	other
Plekha6	0.00267197	0.0407033	0.42	0.288	1	other
Ociad2	0.0300593	0.0406914	0.379	0.29	1	other
Rpa1	0.00257127	0.0406876	0.15	0.086	1	other
Coa5	0.00305384	0.0405959	0.409	0.279	1	other
Gm26894	0.000942232	0.0405722	0.055	0.016	1	other
Prmt3	0.00171039	0.0405587	0.17	0.098	1	other
Fkbp1a	0.106195	0.0405017	0.957	0.898	1	other
Fez2	0.00137752	0.0404699	0.193	0.113	1	other
Lrrfip1	0.0115108	0.0404638	0.191	0.125	1	other
Cfap161	0.00115066	0.0404601	0.038	0.007	1	other
Pcf11	0.00993099	0.0404267	0.308	0.22	1	other
Prdx4	0.00320101	0.0403525	0.049	0.016	1	other
Zfp120	0.00402758	0.0403296	0.225	0.143	1	other
Cpsf2	0.00199557	0.0403292	0.292	0.19	1	other
Dgkq	0.0109333	0.0402856	0.302	0.213	1	other
Smad7	0.00303622	0.0402834	0.16	0.093	1	other
Gga1	0.00920505	0.040276	0.24	0.161	1	other
Pick1	0.00428231	0.0402587	0.256	0.168	1	other
Lipa	0.0160557	0.0402583	0.119	0.073	1	other
Mafb	0.00562561	0.040241	0.05	0.018	1	other
Coq8a	0.00626857	0.0402224	0.072	0.034	1	other
Ado	0.000947366	0.04021	0.108	0.05	1	other
Nacc2	0.0137161	0.0402076	0.124	0.077	1	other
Alkbh2	0.00687664	0.0401805	0.097	0.052	1	other
Coq10a	0.00412556	0.0401683	0.205	0.129	1	other
Exosc2	0.023328	0.0401496	0.203	0.143	1	other
Cul4a	0.0234908	0.0401436	0.334	0.247	1	other
Grin2a	0.00148622	0.0401295	0.139	0.075	1	other
Ankrd29	0.002593	0.0401016	0.104	0.052	1	other
Nek9	0.00800896	0.0400883	0.15	0.093	1	other
Ctnna2	0.0694512	0.0400675	0.571	0.465	1	other
Inpp5f	0.0909196	0.0400629	0.815	0.673	1	other
Stx4a	0.0908504	0.0400259	0.381	0.311	1	other
Pin4	0.0587612	0.04002	0.418	0.327	1	other
Epb41l2	0.0242462	0.0400101	0.158	0.107	1	other
Snrpf	0.0526774	0.0399842	0.785	0.678	1	other
Rraga	0.00815392	0.0399594	0.565	0.42	1	other
Rpl32	0.0530814	0.0398932	1	1	1	other
Rragd	0.00401112	0.0398922	0.242	0.156	1	other
Abhd3	0.00373334	0.0398865	0.069	0.029	1	other
Ttyh1	0.00765361	0.0398308	0.276	0.19	1	other
Elac2	0.0049596	0.0398051	0.103	0.054	1	other
Actr3b	0.0115528	0.0397888	0.302	0.22	1	other
Pou2f1	0.0104044	0.0397864	0.207	0.138	1	other
Plxna4	0.0293059	0.0397847	0.383	0.288	1	other
Mtx3	0.00337856	0.0397843	0.2	0.122	1	other
Polg	0.000574214	0.0397751	0.189	0.107	1	other
Cenpb	0.00016989	0.0397242	0.202	0.109	1	other
Cyp20a1	0.00128126	0.0396871	0.105	0.05	1	other
Stmn3	0.0836458	0.0396835	0.945	0.862	1	other
Sdad1	0.00474341	0.039673	0.221	0.143	1	other
Coq10b	0.00519267	0.0396656	0.174	0.109	1	other
Zbtb7c	0.000589046	0.0396634	0.187	0.102	1	other
Zfp703	0.0029918	0.039653	0.067	0.027	1	other
Zw10	0.000583731	0.0396345	0.097	0.041	1	other
Hist1h4i	0.00146737	0.0396177	0.041	0.009	1	other
Aard	0.000323203	0.0396121	0.093	0.036	1	other
Actr10	0.0033355	0.0395037	0.557	0.406	1	other
Slc39a7	0.00440994	0.0394861	0.308	0.213	1	other
Chga	0.0170168	0.039444	0.327	0.234	1	other
Eif2b1	0.00838195	0.0394288	0.151	0.093	1	other
Efemp1	0.00245527	0.0394053	0.039	0.009	1	other
Bcap29	0.00151029	0.0393898	0.395	0.263	1	other
Txndc11	0.00826291	0.0393428	0.246	0.166	1	other
Arl2	0.00513703	0.039261	0.338	0.234	1	other
Osbpl7	0.013503	0.0392477	0.09	0.05	1	other
Myo16	0.00420449	0.0392475	0.084	0.041	1	other
Necab1	0.10746	0.0392361	0.192	0.15	1	other
Manba	0.00336754	0.0392289	0.096	0.048	1	other
Dgat1	0.00768263	0.0392117	0.136	0.082	1	other
Fbn2	0.000287366	0.0392017	0.035	0.002	1	other
Snx16	0.00468751	0.0392007	0.464	0.327	1	other
Phldb1	0.0170576	0.0391972	0.154	0.102	1	other
Dhtkd1	0.00307284	0.0391671	0.067	0.027	1	other
Coro6	0.00129378	0.0391603	0.103	0.048	1	other
Tmem164	0.0020555	0.039152	0.099	0.048	1	other
Plekha5	0.00258847	0.039143	0.19	0.116	1	other
Nap1l2	0.0213437	0.0391329	0.422	0.317	1	other
AU019823	0.0373153	0.0391299	0.175	0.125	1	other
Ece1	0.00923288	0.0391129	0.351	0.245	1	other
Dnajc19	0.0187821	0.0390882	0.423	0.315	1	other
Atp11c	0.0070688	0.0390084	0.084	0.043	1	other
Dock7	0.000990822	0.0389668	0.336	0.218	1	other
Nenf	0.44285	0.038965	0.887	0.81	1	other
Dnajc14	0.00200156	0.0389278	0.213	0.132	1	other
Net1	0.0134895	0.0389161	0.055	0.025	1	other
Sntg1	0.00825327	0.0389152	0.181	0.116	1	other
Rpl24	0.0286033	0.0389148	1	1	1	other
Thbs3	0.00388973	0.0389119	0.154	0.091	1	other
Sez6l2	0.0502883	0.0388987	0.754	0.612	1	other
Serpini1	0.0765684	0.0388536	0.482	0.388	1	other
Fam214a	0.0042261	0.0388306	0.256	0.168	1	other
Serpina3n	0.0033929	0.0388264	0.059	0.023	1	other
Trap1	0.00644191	0.0388185	0.085	0.043	1	other
Prpsap1	0.00504897	0.0388126	0.292	0.2	1	other
Nat8f1	0.00761989	0.0388022	0.106	0.059	1	other
Hsp90b1	0.183093	0.0387762	0.774	0.662	1	other
Cs	0.00360438	0.0387342	0.498	0.349	1	other
Adgrb3	0.133503	0.0387203	0.666	0.553	1	other
Hdac11	0.107774	0.0387106	0.861	0.787	1	other
Dcaf11	0.00497453	0.0386557	0.235	0.152	1	other
2900026A02Rik	0.00133971	0.0386501	0.116	0.057	1	other
Tcp1	0.0668111	0.0386319	0.796	0.673	1	other
Eloa	0.00981904	0.0386053	0.117	0.068	1	other
Ryr3	0.00978217	0.0385244	0.148	0.093	1	other
Pknox2	0.00459981	0.0385041	0.107	0.057	1	other
Gpr137b	0.000547018	0.0384992	0.05	0.011	1	other
Gad2	0.381666	0.0384955	0.954	0.927	1	other
Tmem8	0.000677671	0.0384926	0.06	0.018	1	other
Mfap3l	0.00424195	0.0384649	0.135	0.077	1	other
Fat3	0.0272985	0.0384643	0.22	0.159	1	other
Mapk9	0.0506381	0.0384476	0.614	0.478	1	other
Tank	0.00153779	0.0384317	0.087	0.039	1	other
2610002M06Rik	0.00331389	0.038418	0.352	0.243	1	other
Mettl23	0.0234424	0.0384153	0.195	0.136	1	other
Cds1	0.00578217	0.0383921	0.117	0.066	1	other
Ppfia1	0.00597788	0.0383864	0.211	0.136	1	other
Far1	0.00596679	0.0383717	0.485	0.347	1	other
Srrt	0.0170771	0.0383535	0.388	0.283	1	other
Iqcg	0.0032989	0.0383382	0.056	0.02	1	other
Sirt6	0.00259916	0.0383239	0.12	0.063	1	other
Csnk1g1	0.00561784	0.0383084	0.312	0.215	1	other
Lars2	0.0349555	0.0382805	0.108	0.07	1	other
Hsdl1	0.00190104	0.0382746	0.375	0.256	1	other
Islr2	0.00511689	0.0382661	0.161	0.098	1	other
Gpx4	0.132929	0.0382411	0.954	0.866	1	other
Dlk2	0.00117053	0.0382274	0.145	0.077	1	other
1700037H04Rik	0.0312602	0.0382165	0.531	0.406	1	other
Mrpl15	0.0072155	0.0381952	0.187	0.12	1	other
Rbfa	0.0131916	0.0381151	0.189	0.125	1	other
Myh10	0.0366872	0.0380961	0.62	0.488	1	other
Pcdhga12	0.00220309	0.0380804	0.164	0.095	1	other
Ppp1r35	0.000544942	0.0380614	0.156	0.079	1	other
P3h4	0.0069774	0.0380354	0.176	0.111	1	other
Lztr1	0.000832877	0.0380098	0.213	0.122	1	other
Zfp46	0.0155555	0.0379789	0.095	0.054	1	other
Rnf128	0.00657155	0.037964	0.122	0.07	1	other
Dffa	0.0460001	0.0379557	0.184	0.134	1	other
Atp5j2	0.0549795	0.0379543	0.918	0.846	1	other
Akt1s1	0.00470211	0.0379372	0.258	0.17	1	other
Rnf187	0.0937995	0.037926	0.865	0.735	1	other
Ints11	0.0139106	0.0379242	0.11	0.066	1	other
Nrep	0.0103767	0.0379154	0.201	0.136	1	other
B130006D01Rik	0.00349236	0.0378934	0.09	0.043	1	other
Mul1	0.0197673	0.0378504	0.214	0.147	1	other
Uba2	0.0101138	0.0378489	0.391	0.281	1	other
Pim2	0.0176602	0.037839	0.319	0.231	1	other
G6pdx	0.0101873	0.0378223	0.167	0.107	1	other
Zfp788	0.00250986	0.0378213	0.26	0.168	1	other
Tomm40	0.00272648	0.0377763	0.344	0.236	1	other
Acss2	0.00168344	0.0377143	0.134	0.07	1	other
Tspyl1	0.0873684	0.0377092	0.798	0.683	1	other
Cog3	0.000979025	0.0376699	0.136	0.07	1	other
Etf1	0.00764894	0.0376409	0.457	0.324	1	other
Ssbp3	0.0432021	0.0376357	0.728	0.59	1	other
Zfp865	0.00740549	0.0376041	0.118	0.068	1	other
Ppib	0.0150665	0.037577	0.245	0.17	1	other
Ppm1l	0.0319984	0.0375696	0.546	0.422	1	other
Golt1b	0.0108136	0.0375581	0.319	0.222	1	other
Vps33a	0.0107251	0.0375507	0.192	0.127	1	other
Nol3	0.00738118	0.0375477	0.175	0.111	1	other
Rmnd5b	0.00315152	0.0374828	0.103	0.052	1	other
Vars	0.017911	0.0374605	0.111	0.068	1	other
Atp8b2	0.012484	0.0374475	0.093	0.052	1	other
Tubg2	0.0333839	0.0374327	0.257	0.19	1	other
Cbx3	0.118307	0.0374009	0.787	0.707	1	other
Letm1	0.0103592	0.0373685	0.227	0.152	1	other
Tigd5	0.00474871	0.037342	0.043	0.014	1	other
Shisa6	0.000500071	0.0372878	0.027	0	1	other
Ypel2	0.00712473	0.0372875	0.275	0.186	1	other
Rsph10b	0.00826859	0.0372789	0.065	0.029	1	other
Rxra	0.025051	0.0372708	0.168	0.116	1	other
Nphp1	0.00152503	0.037266	0.192	0.113	1	other
Rundc1	0.00243123	0.0372615	0.173	0.102	1	other
Actr2	0.0866972	0.0372529	0.833	0.712	1	other
AW549877	0.0080916	0.0372443	0.28	0.193	1	other
Trmt11	0.00214464	0.0372144	0.146	0.082	1	other
Ssbp1	0.00563444	0.0372045	0.295	0.197	1	other
Zfp941	0.0213304	0.0371729	0.419	0.306	1	other
Uba5	0.0129489	0.0371539	0.417	0.299	1	other
Ebna1bp2	0.002152	0.0371347	0.303	0.197	1	other
Nfxl1	0.00160051	0.0371318	0.126	0.066	1	other
Slc35e1	0.00575498	0.0371286	0.186	0.118	1	other
Cc2d1b	0.00578241	0.0370765	0.16	0.098	1	other
Frs3	0.00212239	0.037075	0.274	0.175	1	other
Nup35	0.00628152	0.0370741	0.059	0.025	1	other
Coasy	0.000551591	0.0370558	0.094	0.039	1	other
Gucd1	0.00128379	0.0370397	0.082	0.034	1	other
Nrxn3	0.0380311	0.0370395	0.992	0.991	1	other
Rprd1a	0.0110053	0.0370378	0.537	0.399	1	other
Taf8	0.00332216	0.0370341	0.07	0.029	1	other
Atf1	0.00092154	0.0370274	0.17	0.093	1	other
Trim33	0.00371785	0.0370024	0.285	0.188	1	other
Sptlc1	0.00737577	0.0369908	0.147	0.088	1	other
Ccdc92	0.198225	0.0369892	0.566	0.465	1	other
Slc45a4	0.00971	0.0369679	0.201	0.134	1	other
Smyd4	0.00601979	0.0369483	0.118	0.066	1	other
2610507B11Rik	0.00445758	0.0369401	0.44	0.308	1	other
Stat3	0.00313006	0.0369094	0.214	0.134	1	other
Zfp235	0.0104344	0.0368864	0.085	0.045	1	other
Sntb2	0.00149529	0.0368737	0.071	0.027	1	other
Pxk	0.00630253	0.0368637	0.285	0.195	1	other
Bicd2	0.0174742	0.0368399	0.185	0.125	1	other
Syn1	0.0582434	0.0368392	0.735	0.596	1	other
Rps3	0.0367976	0.0368222	0.999	1	1	other
Ier5	0.00160458	0.0368006	0.049	0.014	1	other
1110032A03Rik	0.0108994	0.0367976	0.492	0.367	1	other
Selenop	0.00146402	0.0367902	0.092	0.041	1	other
Gnas	0.632171	0.0367629	0.997	0.984	1	other
Bicral	0.0437037	0.0367039	0.313	0.236	1	other
Mrps14	0.0150979	0.0366882	0.532	0.397	1	other
Trappc11	0.00135264	0.0366847	0.215	0.129	1	other
Rin2	0.00359041	0.0366771	0.063	0.025	1	other
Copg1	0.119205	0.0366607	0.687	0.558	1	other
Mogs	0.0255967	0.0366558	0.06	0.032	1	other
Wscd1	0.0237201	0.036643	0.133	0.086	1	other
Fbxo17	0.00532142	0.036641	0.06	0.025	1	other
Pard3	0.00649622	0.036632	0.283	0.197	1	other
Tmem2	0.000993428	0.0366263	0.104	0.048	1	other
Tmem263	0.00646914	0.0366262	0.375	0.256	1	other
Rab3a	0.0339889	0.0366008	0.88	0.791	1	other
Chd2	0.00736858	0.0365801	0.384	0.268	1	other
Zfp592	0.0239445	0.0365799	0.089	0.052	1	other
Aebp2	0.00293387	0.0365773	0.368	0.249	1	other
Spint2	0.112422	0.036556	0.504	0.413	1	other
Dip2b	0.00306115	0.0365392	0.311	0.204	1	other
Madd	0.0255484	0.036513	0.587	0.438	1	other
Erbin	0.00272882	0.0364842	0.12	0.063	1	other
Bcr	0.0114008	0.0364839	0.405	0.293	1	other
Frat1	0.00265193	0.036417	0.211	0.132	1	other
Rab3gap2	0.00752184	0.0364161	0.342	0.24	1	other
Rbm15b	0.00689192	0.0363997	0.21	0.136	1	other
Slc39a13	0.00685237	0.0363871	0.094	0.05	1	other
Traf7	0.00131428	0.0363842	0.138	0.073	1	other
Ampd3	0.0058825	0.036367	0.093	0.048	1	other
Kdelr1	0.0121639	0.0363652	0.366	0.265	1	other
Setd1b	0.0139566	0.0363041	0.33	0.24	1	other
Sall1	0.00173161	0.0362844	0.044	0.011	1	other
Ppp6c	0.00446437	0.0362788	0.287	0.193	1	other
Nfasc	0.0374114	0.0362263	0.589	0.454	1	other
Serinc1	0.0221922	0.0362042	0.976	0.959	1	other
AW554918	0.0140126	0.0361586	0.105	0.061	1	other
Plagl1	0.0314583	0.0361538	0.116	0.075	1	other
BC005537	0.0654813	0.0361411	0.672	0.537	1	other
Gm11361	0.00661751	0.0361348	0.121	0.07	1	other
Pts	0.0146787	0.0361348	0.287	0.204	1	other
Gpx1	0.0577599	0.0361315	0.596	0.474	1	other
Babam1	0.026201	0.0361164	0.274	0.197	1	other
Wars	0.0159982	0.0361112	0.301	0.215	1	other
Csnk1g2	0.0506714	0.0361111	0.411	0.315	1	other
Psmd3	0.00060817	0.0360987	0.339	0.218	1	other
Slc5a5	0.0748503	0.0360923	0.389	0.308	1	other
Trappc1	0.00069406	0.0360416	0.239	0.141	1	other
Tada3	0.00556375	0.0360311	0.156	0.095	1	other
Ttc39a	0.0034674	0.0360219	0.059	0.023	1	other
Gprasp1	0.0480757	0.0359989	0.971	0.925	1	other
Ikzf4	0.016033	0.0359787	0.255	0.177	1	other
Hip1r	0.0218103	0.0359674	0.192	0.134	1	other
Cacng5	0.102028	0.0359556	0.17	0.129	1	other
Sema6b	0.0281128	0.0359416	0.388	0.299	1	other
Per3	0.0272861	0.0359406	0.437	0.336	1	other
2310057M21Rik	0.0156359	0.0358897	0.191	0.129	1	other
Slc36a4	0.0162318	0.0358418	0.41	0.304	1	other
Tns3	0.00377504	0.0358343	0.052	0.018	1	other
Swsap1	0.0124815	0.0358337	0.063	0.029	1	other
Eif1	0.0419818	0.0358108	0.999	0.991	1	other
Gm10076	0.161961	0.035794	0.713	0.603	1	other
D430042O09Rik	0.0145991	0.0357773	0.275	0.195	1	other
Dst	0.0428475	0.0357765	0.771	0.646	1	other
Nars2	0.00321283	0.0357501	0.09	0.043	1	other
Rps16	0.0252874	0.035732	1	0.998	1	other
Wtap	0.0610397	0.0357062	0.474	0.376	1	other
Akr1e1	0.00160869	0.0356937	0.12	0.061	1	other
March8	0.00254927	0.0356318	0.413	0.286	1	other
Rgs5	0.00513778	0.0356123	0.023	0.002	1	other
Slc30a5	0.00104437	0.0356063	0.213	0.127	1	other
Atmin	0.00914418	0.0355866	0.408	0.295	1	other
Ankfy1	0.00233138	0.035579	0.285	0.184	1	other
Kmt5b	0.00350795	0.0355677	0.311	0.204	1	other
Pnrc1	0.00692992	0.0355305	0.325	0.224	1	other
Plekhg5	0.00161042	0.0355289	0.176	0.102	1	other
Lasp1	0.0190069	0.0355064	0.405	0.297	1	other
Zfp707	0.0040139	0.0354884	0.082	0.039	1	other
Zmym2	0.00740841	0.0354732	0.317	0.224	1	other
Pfkfb2	0.00313523	0.0354539	0.119	0.063	1	other
Ccdc127	0.0154407	0.0354527	0.357	0.254	1	other
Rragc	0.00378755	0.0354513	0.44	0.311	1	other
Pygb	0.00690201	0.035439	0.343	0.238	1	other
Gm13483	0.00279266	0.0354372	0.05	0.016	1	other
Cand2	0.00542271	0.0354369	0.07	0.032	1	other
Col11a1	0.0434485	0.0354276	0.069	0.041	1	other
Klf5	0.0266936	0.0354004	0.06	0.032	1	other
Usp42	0.00339689	0.0353644	0.148	0.086	1	other
Ppp1r26	0.00700396	0.0353492	0.154	0.095	1	other
Kmt5c	0.00632102	0.035325	0.102	0.054	1	other
Psenen	0.00460439	0.0352107	0.43	0.297	1	other
Rab3d	0.00443791	0.0351802	0.065	0.027	1	other
1810037I17Rik	0.0337674	0.0351771	0.715	0.578	1	other
Qsox1	0.0113582	0.0351761	0.205	0.136	1	other
Actn1	0.0217379	0.0351724	0.283	0.204	1	other
Lrrc55	0.0116109	0.0351037	0.163	0.104	1	other
Inip	0.000719613	0.035093	0.085	0.034	1	other
B3galnt2	0.00558025	0.0350897	0.09	0.045	1	other
Rps12-ps3	0.0118354	0.0350695	0.108	0.063	1	other
Dnajc2	0.00142598	0.0350411	0.241	0.147	1	other
Tox4	0.0269747	0.0350316	0.377	0.279	1	other
Mfsd6	0.187107	0.0350225	0.531	0.449	1	other
Praf2	0.0200498	0.0350203	0.362	0.263	1	other
Nlk	0.00287196	0.0350111	0.317	0.211	1	other
Slc35f6	0.0177664	0.0349835	0.109	0.066	1	other
Ndufv3	0.0555762	0.034968	0.724	0.583	1	other
Acvr2a	0.00543388	0.0349263	0.271	0.184	1	other
Gm996	0.0143546	0.0348896	0.198	0.134	1	other
Dgcr14	0.0183726	0.0348814	0.12	0.075	1	other
AU040320	0.0263294	0.0348774	0.242	0.172	1	other
Ndufa6	0.0864521	0.0348736	0.924	0.846	1	other
Brinp3	0.072065	0.034839	0.32	0.254	1	other
Nceh1	0.036529	0.0348331	0.401	0.299	1	other
Spg20	0.00067693	0.0348135	0.268	0.163	1	other
Mrps18a	0.0173767	0.0348003	0.419	0.308	1	other
Acss3	0.0538048	0.0347692	0.031	0.014	1	other
Cish	0.00522138	0.03476	0.064	0.027	1	other
Kctd21	0.000897443	0.0347463	0.035	0.005	1	other
Dtx4	0.013366	0.0347448	0.129	0.079	1	other
Klf8	0.00117126	0.0347239	0.033	0.005	1	other
Bysl	0.00354266	0.0346989	0.083	0.039	1	other
Trim13	0.0270771	0.0346969	0.06	0.032	1	other
Pigf	0.00782122	0.0346909	0.109	0.061	1	other
Fam213b	0.0356784	0.0346853	0.593	0.463	1	other
Pex1	0.0194016	0.0346699	0.176	0.118	1	other
Bahd1	0.0103394	0.0346469	0.079	0.041	1	other
Stard7	0.0122604	0.0346457	0.554	0.424	1	other
Fstl4	0.001211	0.0346381	0.054	0.016	1	other
Reep3	0.0104073	0.0345762	0.1	0.057	1	other
Wdyhv1	0.0110205	0.0345737	0.099	0.057	1	other
Gm42517	0.00409753	0.0345682	0.117	0.063	1	other
Pfkfb3	0.00838123	0.0345666	0.121	0.07	1	other
Sh3gl3	0.00914001	0.034561	0.485	0.361	1	other
AC163032.1	0.0207786	0.0345409	0.081	0.045	1	other
Wrap53	0.000374216	0.0344757	0.033	0.002	1	other
Rnf40	0.0020776	0.0344692	0.14	0.077	1	other
Hrasls	0.00019553	0.0344364	0.212	0.116	1	other
Tmem199	0.00709167	0.0344232	0.352	0.247	1	other
Fam207a	0.00124861	0.0343506	0.27	0.168	1	other
Psmd14	0.00255294	0.03434	0.351	0.234	1	other
Rps3a1	0.0473931	0.0343321	1	1	1	other
Ralgapb	0.00235135	0.0343083	0.333	0.22	1	other
Hspd1	0.0136755	0.0342785	0.64	0.488	1	other
Pex12	0.0119828	0.034274	0.081	0.043	1	other
Gosr2	0.00579419	0.0342586	0.386	0.268	1	other
Pigt	0.00943171	0.0342444	0.262	0.179	1	other
Arap2	0.00704837	0.0342294	0.049	0.018	1	other
Ap1s3	0.00432353	0.0342167	0.048	0.016	1	other
Lrrn1	0.00528831	0.0342057	0.13	0.075	1	other
Park2	0.0163783	0.0341992	0.212	0.145	1	other
Rundc3a	0.0140843	0.0341958	0.641	0.481	1	other
Echdc1	0.0122531	0.034181	0.121	0.073	1	other
Dap	0.0194434	0.0341681	0.069	0.036	1	other
Zbtb7a	0.0918833	0.0341597	0.647	0.528	1	other
Pdss2	0.0134393	0.0341475	0.126	0.077	1	other
Trim46	0.0470822	0.0341475	0.309	0.236	1	other
Srsf12	0.00267965	0.0341417	0.355	0.236	1	other
Brms1	0.00157191	0.0341389	0.064	0.023	1	other
Mrpl13	0.0183394	0.0341222	0.234	0.163	1	other
Hrh1	0.0150208	0.0340769	0.089	0.05	1	other
Bola3	0.0677954	0.0340678	0.63	0.492	1	other
Rdh12	0.00441552	0.0340585	0.048	0.016	1	other
Cox19	0.0439569	0.0340509	0.311	0.234	1	other
Galns	0.0165793	0.0340487	0.057	0.027	1	other
Lmbrd1	0.0758063	0.0339805	0.596	0.492	1	other
Nova2	0.0172705	0.033968	0.376	0.277	1	other
Mal2	0.0332888	0.0339538	0.486	0.374	1	other
Pxylp1	0.0109286	0.0339039	0.197	0.129	1	other
Lrrc49	0.0460069	0.0338935	0.255	0.19	1	other
Slc12a6	0.037681	0.0338845	0.378	0.283	1	other
Tmtc1	0.00647992	0.0338819	0.177	0.111	1	other
Foxp1	0.0235199	0.0338025	0.388	0.29	1	other
Adh5	0.055312	0.0337996	0.123	0.084	1	other
Asrgl1	0.00443086	0.0337778	0.175	0.107	1	other
Shprh	0.0314689	0.0337749	0.292	0.213	1	other
Medag	0.00659996	0.0337553	0.03	0.007	1	other
Gt(ROSA)26Sor	0.042686	0.0336866	0.28	0.209	1	other
Meis3	0.0206468	0.0336725	0.295	0.211	1	other
Sertad4	0.00401795	0.0336451	0.118	0.063	1	other
Arpc4	0.0400533	0.0336407	0.391	0.297	1	other
Arnt2	0.0348486	0.0336363	0.34	0.259	1	other
Fem1a	0.0126476	0.0335808	0.219	0.145	1	other
Raly	0.00181353	0.033574	0.254	0.159	1	other
Creg2	0.00315475	0.0335536	0.307	0.204	1	other
Carmil1	0.00366464	0.0335447	0.131	0.073	1	other
Irf2bpl	0.0281772	0.0335245	0.464	0.349	1	other
Zfp781	0.00137684	0.0335231	0.028	0.002	1	other
Atad5	0.0063357	0.0335057	0.069	0.032	1	other
Lysmd2	0.0140014	0.0335019	0.465	0.347	1	other
Iscu	0.0309341	0.0334925	0.627	0.497	1	other
Cdkn2aip	0.00139935	0.0334802	0.212	0.125	1	other
Atg2a	0.027177	0.0334382	0.151	0.102	1	other
Dock3	0.0400019	0.0334175	0.417	0.322	1	other
Rbbp9	0.00502605	0.0333869	0.224	0.145	1	other
Arhgdia	0.0675242	0.0333864	0.726	0.601	1	other
Diablo	0.00683579	0.0333806	0.18	0.113	1	other
Kctd13	0.000855286	0.0333729	0.369	0.245	1	other
Ndufc2	0.175987	0.0333581	0.65	0.535	1	other
Cdk7	0.0032594	0.0333345	0.164	0.098	1	other
M6pr	0.0124564	0.0333144	0.458	0.329	1	other
Tubb4a	0.159015	0.0333096	0.834	0.719	1	other
Gpsm1	0.00667826	0.0333028	0.293	0.2	1	other
Tkfc	0.00747757	0.0332529	0.055	0.023	1	other
Coprs	0.0264004	0.0332506	0.515	0.39	1	other
Tril	0.00248921	0.0332211	0.035	0.007	1	other
Mapk8ip1	0.0573444	0.0331941	0.662	0.51	1	other
Lrig2	0.00382118	0.0331539	0.283	0.188	1	other
Jmy	0.00845235	0.0331481	0.24	0.161	1	other
Ptpn23	0.00168712	0.0331472	0.173	0.1	1	other
Frmd6	0.0168687	0.0331457	0.033	0.011	1	other
D17Wsu92e	0.00262384	0.0331249	0.374	0.259	1	other
Fbxo33	0.0125567	0.0331222	0.549	0.399	1	other
Mmp2	0.00239942	0.0330907	0.03	0.005	1	other
Endog	0.0116435	0.033078	0.164	0.104	1	other
Thnsl1	0.00555414	0.0330374	0.184	0.116	1	other
Gstm5	0.00475205	0.0330331	0.343	0.236	1	other
Trmt112	0.0489634	0.0330313	0.562	0.435	1	other
Mknk2	0.0114106	0.0330185	0.063	0.029	1	other
Txnl4b	0.00444734	0.0329932	0.085	0.041	1	other
Cst3	0.0377006	0.0329375	0.762	0.639	1	other
Ppp2r2d	0.0110301	0.0329184	0.387	0.283	1	other
Reep1	0.0107072	0.0328524	0.68	0.515	1	other
Fam53b	0.00995896	0.0328512	0.092	0.05	1	other
Rftn1	0.00584031	0.0328445	0.131	0.075	1	other
[truncated: 15,050 more rows]

## Sheet: male branch1
	p_val	avg_logFC	pct.1	pct.2	p_val_adjust
Parm1	5.58659e-27	0.607201	0.628	0.254	9.29552e-23
Prkce	2.2838e-27	0.555192	0.866	0.648	3.80024e-23
Pgr	7.56e-27	0.509733	0.793	0.402	1.25783e-22
Nos1	3.60057e-12	0.498875	0.613	0.398	5.96686e-08
Zbtb20	1.34106e-28	0.490388	0.992	0.918	2.23179e-24
1500009L16Rik	9.04334e-21	0.485767	0.816	0.514	1.50409e-16
Tmem35a	2.95008e-14	0.476308	0.678	0.461	4.89653e-10
Ptp4a1	2.31264e-22	0.455887	0.923	0.65	3.84707e-18
Ctnna2	1.45007e-23	0.444411	0.835	0.479	2.41248e-19
Pcp4	9.19115e-17	0.4382	0.996	0.977	1.52739e-12
Apoc3	1.09264e-22	0.429336	0.613	0.232	1.81772e-18
Grik1	6.11536e-15	0.423356	0.674	0.395	1.01539e-10
Gal	5.18235e-12	0.418105	0.456	0.215	8.58715e-08
Hpcal1	6.64747e-20	0.405355	0.95	0.721	1.10554e-15
Fgfr1	1.05651e-07	0.399134	0.651	0.463	0.00174006
Ogfrl1	3.34908e-13	0.393935	0.828	0.611	5.55445e-09
Irs4	8.50604e-19	0.393872	0.981	0.902	1.41439e-14
Id4	3.10088e-11	0.392839	0.805	0.592	5.13412e-07
Syt6	5.06196e-16	0.38565	0.494	0.219	8.40892e-12
Nrip1	7.96865e-16	0.380297	0.567	0.297	1.32351e-11
Tmcc3	2.70135e-18	0.37321	0.935	0.693	4.49019e-14
Trp53i11	7.44199e-13	0.354149	0.467	0.223	1.23403e-08
Maged1	9.07841e-19	0.351924	0.973	0.865	1.50947e-14
Fstl5	1.54608e-13	0.351058	0.912	0.707	2.56556e-09
mt-Co2	5.66421e-47	0.350314	1	0.998	9.42752e-43
Rbms3	7.74171e-09	0.346552	0.51	0.311	0.000127816
Sytl4	9.96516e-19	0.344482	0.203	0.02	1.65671e-14
Syndig1l	1.6813e-18	0.340858	0.345	0.092	2.795e-14
Olfm3	1.73487e-13	0.338831	0.793	0.518	2.87833e-09
Itm2c	8.89069e-22	0.323484	0.996	0.977	1.47888e-17
Dlgap1	2.70408e-12	0.322207	0.739	0.467	4.48174e-08
Stk19	1.13492e-12	0.321366	0.59	0.318	1.88181e-08
mt-Atp6	7.52449e-42	0.317042	1	1	1.2523e-37
Sez6l	8.21639e-12	0.316	0.92	0.787	1.36113e-07
Rpl12	9.41122e-19	0.305303	0.996	0.98	1.56471e-14
Ipo5	2.9473e-11	0.303242	0.609	0.361	4.88013e-07
Lamp5	1.99272e-16	0.302348	0.333	0.096	3.31091e-12
Greb1	4.29255e-21	0.292411	0.268	0.037	7.1398e-17
Chst11	2.45812e-13	0.289941	0.425	0.18	4.07777e-09
Pdzrn4	2.46567e-09	0.288057	0.782	0.572	4.07477e-05
Socs2	3.20319e-16	0.284809	0.207	0.029	5.32146e-12
Dgkb	8.87268e-09	0.281492	0.732	0.506	0.00014647
Gm16485	6.52946e-16	0.281227	0.299	0.08	1.08461e-11
Map2k1	2.16589e-10	0.280506	0.839	0.639	3.58325e-06
Nexmif	6.2534e-10	0.279668	0.67	0.424	1.03406e-05
Eif1b	5.54162e-14	0.274844	0.977	0.891	9.19688e-10
Park2	3.00705e-12	0.272184	0.402	0.166	4.98358e-08
Hs3st5	1.419e-10	0.271697	0.533	0.295	2.34787e-06
Eef1b2	1.57451e-13	0.271546	0.985	0.857	2.61258e-09
Nrp1	3.47814e-10	0.27025	0.548	0.299	5.75353e-06
Cdkl5	2.55332e-09	0.268855	0.625	0.379	4.21936e-05
Kcnk2	3.89433e-07	0.266918	0.82	0.668	0.00640851
Prkacb	2.16298e-14	0.260502	0.996	0.975	3.59055e-10
Rasgrf2	2.71623e-06	0.259058	0.736	0.582	0.0445897
Phactr1	8.60349e-09	0.25822	0.655	0.459	0.000142035
Elmo1	1.80382e-07	0.257764	0.69	0.471	0.00297017
Gda	3.1939e-08	0.25731	0.847	0.592	0.000526706
Rps2	1.90942e-18	0.257196	1	0.998	3.17404e-14
Rpl13	4.77326e-28	0.256762	1	0.996	7.94318e-24
Ngb	1.01804e-08	0.252858	0.801	0.621	0.000168047
Spon1	1.0969e-06	0.252579	0.437	0.26	0.0180308
Pak3	5.69669e-12	0.25185	0.992	0.938	9.43885e-08
Cntnap2	2.07104e-09	0.250692	0.881	0.711	3.4228e-05
Brinp2	4.03565e-09	0.249524	0.609	0.375	6.66528e-05
Sccpdh	2.86294e-09	0.247904	0.682	0.457	4.73044e-05
Tpt1	4.01347e-13	0.247206	0.981	0.924	6.65593e-09
Dcp2	6.85456e-08	0.24695	0.548	0.33	0.0011297
mt-Nd2	6.60301e-19	0.245999	1	0.992	1.09801e-14
Cartpt	2.85696e-06	0.245616	0.23	0.107	0.0468941
AW551984	7.5652e-10	0.244285	0.943	0.832	1.25083e-05
Plxnc1	1.58837e-08	0.239341	0.693	0.49	0.000262082
Idnk	7.05843e-08	0.238615	0.46	0.266	0.00116316
Drp2	1.54366e-08	0.236535	0.483	0.273	0.00025472
Rps10	1.49029e-15	0.236517	1	0.979	2.47492e-11
Nudt4	3.41371e-09	0.235054	0.51	0.27	5.63979e-05
Ctnnb1	1.25941e-06	0.234935	0.816	0.627	0.0206996
Rpl18	6.6365e-11	0.233291	0.992	0.963	1.09841e-06
Lcorl	8.15611e-08	0.229239	0.402	0.211	0.0013438
Slitrk6	1.53655e-11	0.227321	0.222	0.059	2.54484e-07
Eif4g2	1.32996e-11	0.225858	0.992	0.945	2.20295e-07
Wnt4	9.47258e-07	0.225194	0.307	0.16	0.0155729
Clmp	3.98617e-07	0.224898	0.563	0.359	0.00655924
Sipa1l1	1.12976e-08	0.224274	0.559	0.314	0.000186467
mt-Nd4	3.63166e-19	0.221457	1	0.998	6.03945e-15
Plcb4	7.68045e-07	0.221378	0.736	0.561	0.0126313
Actg1	4.01085e-10	0.219988	1	0.906	6.63434e-06
Tnxb	5.30763e-15	0.219852	0.188	0.025	8.81385e-11
Rpl29	2.65109e-12	0.217757	1	0.973	4.39418e-08
Rpl23	9.13337e-18	0.215088	1	1	1.51806e-13
Rps4x	9.01753e-14	0.213921	1	0.996	1.49646e-09
Sema5a	6.02784e-08	0.213175	0.299	0.135	0.000993749
Rps6	2.43018e-14	0.212986	1	1	4.03385e-10
Rplp0	3.60799e-08	0.211475	0.973	0.908	0.000594921
Shisa2	3.64852e-09	0.208688	0.28	0.105	6.02662e-05
H2-Q2	5.27895e-10	0.207954	0.291	0.109	8.73086e-06
Hspa8	7.056e-08	0.207044	0.985	0.947	0.00116283
Rps24	3.12739e-16	0.206823	1	0.998	5.19585e-12
Rpl23a	1.35324e-16	0.205008	1	0.998	2.24867e-12
Galnt13	7.42534e-07	0.204219	0.571	0.361	0.0122125
Rps3	6.33767e-15	0.201396	1	0.996	1.05224e-10
Unc5b	2.85442e-09	0.200242	0.222	0.072	4.71664e-05
Rps3a1	4.51308e-17	0.198974	1	0.996	7.50029e-13
Tiparp	1.10549e-10	0.198664	0.23	0.066	1.82948e-06
Phlda1	3.0974e-07	0.197948	0.268	0.121	0.00509801
Rps7	9.53826e-15	0.197586	1	0.998	1.58354e-10
Rps20	3.77311e-11	0.197431	0.996	0.982	6.24638e-07
Shisa6	1.30292e-11	0.197329	0.23	0.061	2.15828e-07
Rps9	2.75128e-13	0.196908	1	0.994	4.56355e-09
Maf	6.95057e-09	0.195333	0.211	0.066	0.000114761
mt-Nd1	2.05994e-17	0.195219	1	1	3.42362e-13
Eef2	1.50408e-08	0.193846	0.981	0.906	0.000248204
Irs2	1.58357e-06	0.193567	0.448	0.266	0.0260196
Kdm7a	3.22458e-08	0.191677	0.36	0.172	0.000531733
Rps19	3.29671e-13	0.189964	1	0.998	5.46793e-09
Rpl26	8.56429e-16	0.18636	1	0.998	1.42236e-11
Rpl10a	8.12339e-10	0.186342	0.996	0.992	1.34304e-05
Rps15	1.64536e-13	0.184651	1	0.998	2.72998e-09
Eef1a1	6.5657e-13	0.183444	1	1	1.08879e-08
Ywhah	2.46461e-08	0.181945	0.996	0.965	0.000406537
Rpl7a	7.16143e-08	0.181135	1	0.957	0.00118006
Nefh	1.62848e-07	0.178564	0.295	0.137	0.00268162
Rpl8	1.4665e-11	0.177561	1	0.998	2.42897e-07
Rpl6	1.51369e-12	0.176767	1	1	2.50969e-08
Ret	2.91157e-06	0.176443	0.261	0.121	0.0477877
Prok2	2.55947e-08	0.175891	0.425	0.211	0.000422133
Rpl15	5.41076e-10	0.175742	1	0.998	8.94832e-06
Lamb3	4.16016e-12	0.175319	0.195	0.041	6.89379e-08
Rps18	2.37483e-13	0.17528	1	0.998	3.93985e-09
Eef1g	1.94958e-10	0.17438	1	0.988	3.22558e-06
Rps15a	3.10868e-11	0.172576	1	0.996	5.14672e-07
Scg2	5.56116e-07	0.170503	1	0.982	0.00914866
Ddc	1.49986e-07	0.170295	0.364	0.178	0.00246996
Serinc5	2.01791e-08	0.170283	0.268	0.104	0.000332894
Rplp2	1.27053e-10	0.169935	1	0.998	2.10234e-06
Rpl7	2.17867e-06	0.168302	0.992	0.98	0.0357804
Rpl17	2.32386e-11	0.168279	1	0.996	3.84808e-07
Rpl27a	1.79809e-11	0.168	1	0.998	2.97782e-07
Efemp1	1.18743e-10	0.16638	0.13	0.018	1.96497e-06
Saraf	2.05893e-06	0.166137	0.939	0.857	0.03382
Cckar	1.86378e-06	0.162833	0.249	0.113	0.0306182
Rpl4	1.0559e-08	0.162635	1	0.994	0.000174287
Abca1	2.40881e-06	0.162532	0.126	0.037	0.0395526
Cfap36	2.93217e-06	0.161886	0.54	0.332	0.0481228
Rpl31	1.86007e-11	0.159699	1	1	3.08028e-07
Rps5	4.6537e-09	0.15905	1	1	7.68512e-05
Rpl36a	7.04748e-07	0.157027	1	0.986	0.0115924
Rpl21	4.60263e-11	0.156363	1	0.998	7.61919e-07
Ldlr	8.19732e-08	0.156322	0.272	0.117	0.00135051
Rpl14	1.36353e-09	0.156012	1	1	2.25391e-05
mt-Co3	2.59876e-13	0.15578	1	1	4.31083e-09
mt-Cytb	6.14506e-11	0.154753	1	1	1.01713e-06
Pts	1.42594e-06	0.154575	0.368	0.195	0.0234325
Tgfb2	2.39804e-06	0.153795	0.142	0.045	0.0393782
Rps12	6.63415e-08	0.153646	1	0.986	0.00109344
Rps14	2.36507e-12	0.152994	1	1	3.92081e-08
Nxn	8.33904e-08	0.152026	0.184	0.059	0.00137377
Mrfap1	1.39634e-06	0.15181	1	0.969	0.0229474
Rpl19	4.27449e-10	0.146604	1	0.998	7.07001e-06
Rps27a	6.5909e-09	0.143656	1	0.998	0.000108829
Rpl11	1.43153e-09	0.142475	1	0.998	2.36618e-05
Gfod1	2.14995e-06	0.142214	0.314	0.156	0.0353108
Smoc1	6.42486e-08	0.142024	0.184	0.059	0.00105914
Fkbp5	9.73598e-08	0.141037	0.257	0.104	0.00160361
Rpl22l1	5.17134e-09	0.140608	1	1	8.53944e-05
Fam183b	9.40433e-08	0.140052	0.41	0.199	0.00154908
Rps16	6.24767e-10	0.139554	1	0.996	1.03318e-05
Carm1	2.68942e-06	0.138619	0.314	0.16	0.0441576
Rps8	4.02195e-09	0.138471	1	0.998	6.64306e-05
Rpl32	2.35544e-07	0.136216	1	1	0.00387775
Rpl39	9.11655e-07	0.132248	0.996	0.994	0.0149894
Rpl35a	3.4347e-09	0.130726	1	1	5.67413e-05
Fbn2	6.35705e-10	0.128483	0.207	0.057	1.05114e-05
Rpl18a	2.95733e-06	0.127806	1	0.996	0.0485328
Dmrtc1a	2.37967e-07	0.125889	0.199	0.07	0.00391741
Rpl37	9.88039e-10	0.120443	1	1	1.63343e-05
Rplp1	2.71471e-06	0.1193	1	1	0.0445674
Rpl9	8.30625e-07	0.11378	1	1	0.0136596
Hcrtr1	8.96171e-08	0.112986	0.107	0.02	0.00147626
Lamb1	4.19055e-09	0.111454	0.138	0.027	6.92069e-05
Etfbkmt	5.80322e-07	0.109719	0.161	0.051	0.00954629
mt-Co1	1.2629e-08	0.106759	1	1	0.000208416
Frmd6	6.53657e-08	0.104434	0.115	0.021	0.00107749
Csgalnact1	1.03751e-06	0.104367	0.138	0.039	0.0170557
Foxo1	1.56701e-06	0.103788	0.23	0.094	0.0257491
Krt90	7.28313e-07	0.0891655	0.107	0.023	0.0119793

## Sheet: male branch2
	p_val	avg_logFC	pct.1	pct.2	p_val_adjust
Nts	1.16235e-41	0.98678	0.783	0.322	1.94474e-37
Napb	2.92233e-60	0.816769	1	0.914	4.89081e-56
Sv2c	4.14203e-33	0.65117	0.775	0.377	6.92755e-29
Cntnap2	1.48783e-44	0.641448	0.97	0.711	2.48944e-40
Ap1s2	2.87485e-28	0.64004	0.82	0.459	4.80474e-24
Lamp5	1.08966e-37	0.574563	0.502	0.096	1.82299e-33
Thy1	1.19033e-30	0.540622	0.959	0.742	1.99012e-26
Vsnl1	2.14381e-31	0.534955	0.959	0.688	3.58488e-27
Adra2a	4.40624e-37	0.5287	0.536	0.113	7.37119e-33
Pdzrn4	2.09256e-32	0.525297	0.936	0.572	3.49959e-28
Pgr	4.93606e-30	0.515817	0.835	0.402	8.2521e-26
Hmgcs1	1.5707e-23	0.503875	0.888	0.617	2.62339e-19
Spock1	4.82417e-29	0.499082	0.959	0.676	8.0636e-25
Cadps2	1.11682e-24	0.495649	0.629	0.244	1.86598e-20
Gpr101	5.34817e-18	0.484261	0.64	0.314	8.90684e-14
Gpr83	2.33089e-21	0.463867	0.341	0.074	3.88955e-17
Cplx1	4.32713e-20	0.46033	0.633	0.291	7.21463e-16
Grin3a	4.07627e-22	0.457722	0.73	0.324	6.80371e-18
Ptp4a1	1.3173e-21	0.439023	0.895	0.65	2.19832e-17
Pid1	6.62204e-18	0.431503	0.7	0.367	1.10277e-13
Lynx1	4.40736e-20	0.429933	0.794	0.439	7.34795e-16
Camk4	1.02242e-20	0.428665	0.652	0.291	1.70561e-16
Pak3	5.36591e-35	0.42819	0.996	0.938	8.97609e-31
Rap1gds1	1.94662e-23	0.42239	0.858	0.504	3.25066e-19
Tmem215	5.25732e-28	0.421801	0.423	0.09	8.78603e-24
Pgam1	1.70293e-23	0.417584	0.966	0.746	2.84406e-19
mt-Co2	5.98524e-64	0.412861	1	0.998	1.00175e-59
Pappa	3.48779e-31	0.410143	0.371	0.047	5.83194e-27
Dhcr24	1.38577e-23	0.407141	0.603	0.23	2.31479e-19
Aldoc	9.70666e-18	0.407139	0.652	0.336	1.61616e-13
Irs2	3.96879e-22	0.406294	0.64	0.266	6.6247e-18
Crim1	1.7368e-12	0.40431	0.779	0.531	2.8791e-08
Nexmif	3.18743e-18	0.400066	0.76	0.424	5.30961e-14
Id4	3.69861e-18	0.396354	0.876	0.592	6.1604e-14
Bend6	2.35521e-19	0.38379	0.899	0.645	3.92543e-15
Ogfrl1	4.88305e-17	0.377067	0.888	0.611	8.12882e-13
Map1a	2.23448e-20	0.3768	0.914	0.656	3.72644e-16
Syn2	1.18516e-20	0.37065	0.974	0.812	1.97684e-16
Rspo1	7.59166e-19	0.365307	0.509	0.205	1.26507e-14
Ets2	8.35457e-20	0.364307	0.831	0.486	1.39271e-15
Parm1	5.94497e-15	0.358662	0.558	0.254	9.87816e-11
Gfra1	1.52147e-19	0.358182	0.667	0.297	2.53599e-15
Nr2f2	3.21457e-15	0.357041	0.783	0.432	5.34262e-11
Ankrd46	1.99334e-15	0.35316	0.843	0.555	3.31432e-11
Prkce	1.82087e-18	0.352843	0.948	0.648	3.03393e-14
Cdh4	7.0275e-21	0.35121	0.513	0.18	1.17254e-16
Nat8l	6.42274e-16	0.350326	0.764	0.479	1.06842e-11
Snca	7.45541e-14	0.349204	0.738	0.445	1.2376e-09
Ctnna2	2.38056e-12	0.347101	0.73	0.479	3.9453e-08
Sez6l	1.85363e-14	0.34549	0.936	0.787	3.0787e-10
Nefl	1.93333e-15	0.344001	0.809	0.516	3.21474e-11
Cd83	1.23865e-15	0.340906	0.655	0.328	2.06001e-11
Tac2	7.84952e-11	0.340491	0.169	0.035	1.29784e-06
Calm3	1.28904e-23	0.339752	0.996	0.926	2.15334e-19
Actg1	1.31727e-20	0.337645	0.993	0.906	2.19708e-16
Ncdn	2.15127e-15	0.337188	0.918	0.715	3.57626e-11
Idi1	4.11215e-19	0.336737	0.487	0.17	6.85331e-15
mt-Nd4	1.23399e-45	0.332048	1	0.998	2.06483e-41
Msmo1	1.21812e-15	0.331115	0.708	0.379	2.02598e-11
Tnfrsf21	1.18285e-15	0.328382	0.7	0.363	1.96744e-11
Ogdh	2.69934e-16	0.32705	0.843	0.516	4.4917e-12
Tspyl4	6.43877e-22	0.326103	0.989	0.898	1.07463e-17
Gad2	2.68922e-22	0.325199	0.996	0.953	4.48965e-18
Ccnb1ip1	4.37379e-10	0.324996	0.412	0.195	7.21457e-06
Insig1	4.98217e-14	0.324944	0.573	0.271	8.2719e-10
mt-Nd2	6.57776e-35	0.324671	1	0.992	1.10026e-30
Scn2b	1.96621e-12	0.323987	0.884	0.666	3.25899e-08
Scd2	2.84361e-15	0.322266	0.959	0.852	4.72637e-11
Hspa12a	3.10167e-16	0.32226	0.629	0.299	5.16087e-12
AF529169	5.81481e-23	0.321701	0.371	0.076	9.70898e-19
Hs3st2	4.44775e-32	0.319663	0.303	0.018	7.43797e-28
Maged1	3.52643e-16	0.31865	0.963	0.865	5.86727e-12
Sult4a1	1.03987e-13	0.318506	0.903	0.674	1.72587e-09
Sncb	6.73304e-14	0.318322	0.899	0.713	1.11775e-09
Nova1	1.72632e-14	0.317075	0.813	0.469	2.86776e-10
mt-Nd1	8.23611e-46	0.315939	1	1	1.37823e-41
Dynll2	5.13309e-26	0.315289	0.996	0.979	8.57739e-22
Arf1	2.55231e-18	0.314594	0.966	0.85	4.25216e-14
Hapln4	5.96552e-17	0.313685	0.539	0.229	9.93021e-13
Gnai1	3.1538e-10	0.311519	0.772	0.533	5.20629e-06
Arf3	8.32736e-18	0.311187	0.993	0.875	1.38659e-13
Calb2	2.30811e-13	0.310945	0.764	0.439	3.82915e-09
Eno2	5.65278e-15	0.309256	0.974	0.834	9.39323e-11
Got1	1.00485e-13	0.309149	0.809	0.514	1.66784e-09
Nsf	5.13865e-21	0.308771	0.993	0.928	8.57435e-17
Fxyd7	1.2541e-16	0.307928	0.689	0.344	2.08719e-12
Stx1b	1.51399e-13	0.306462	0.944	0.701	2.51231e-09
Irs4	2.74118e-13	0.305655	0.978	0.902	4.5468e-09
Pdha1	2.04263e-13	0.304777	0.76	0.441	3.38913e-09
Prkar1b	3.78526e-20	0.303057	1	0.939	6.31191e-16
Hcn1	2.93499e-11	0.302911	0.648	0.373	4.85535e-07
2900097C17Rik	1.54979e-23	0.300837	1	0.98	2.58861e-19
Ecel1	7.14252e-12	0.300675	0.85	0.559	1.18287e-07
Ywhag	8.51632e-29	0.300491	1	0.99	1.42342e-24
Ldlr	8.08613e-21	0.300283	0.423	0.117	1.34909e-16
Ina	6.8222e-13	0.299375	0.959	0.785	1.13126e-08
1500009L16Rik	1.96776e-10	0.298845	0.768	0.514	3.25016e-06
mt-Atp6	3.068e-47	0.297947	1	1	5.1343e-43
Rnf157	2.20394e-12	0.296924	0.734	0.434	3.65282e-08
Fam171b	4.07124e-14	0.296796	0.948	0.793	6.76029e-10
Gabra5	2.10009e-15	0.294957	0.588	0.262	3.49161e-11
Stard4	2.50152e-20	0.294955	0.434	0.125	4.17153e-16
Timp2	8.31895e-18	0.294104	0.993	0.914	1.38527e-13
Gap43	3.67965e-22	0.293293	1	0.975	6.14244e-18
Itm2c	1.39699e-20	0.292879	1	0.977	2.32991e-16
Cnr1	3.77798e-13	0.292844	0.884	0.6	6.2654e-09
Ids	1.95577e-12	0.292723	0.951	0.781	3.24189e-08
Ndrg4	1.01663e-19	0.289904	0.996	0.955	1.69462e-15
Tuba4a	1.61215e-13	0.289689	0.861	0.572	2.67504e-09
Slc12a5	6.61527e-15	0.286135	0.981	0.848	1.09913e-10
Kif5a	3.46786e-15	0.28608	0.959	0.777	5.76324e-11
Zwint	1.06126e-20	0.284279	1	0.98	1.77028e-16
Cltc	3.0659e-14	0.282737	0.989	0.865	5.09123e-10
Snap25	1.49213e-15	0.282376	1	0.936	2.48127e-11
Magi1	1.19836e-11	0.280335	0.876	0.627	1.98365e-07
Acvr1c	1.92844e-23	0.278957	0.221	0.012	3.22049e-19
Ywhah	2.42886e-18	0.278874	0.993	0.965	4.04672e-14
Tpi1	2.39927e-10	0.276408	0.891	0.742	3.96192e-06
Syt1	1.1532e-07	0.276255	0.835	0.676	0.00188329
Ajap1	8.81269e-17	0.275895	0.382	0.115	1.46678e-12
Idh3a	6.10404e-12	0.275712	0.831	0.582	1.01101e-07
Nell1	4.09382e-10	0.274135	0.655	0.402	6.75439e-06
Reln	2.59812e-09	0.273606	0.243	0.088	4.27417e-05
mt-Nd3	9.07674e-19	0.271068	0.989	0.945	1.51246e-14
Atp6v1g2	3.64259e-12	0.27037	0.948	0.756	6.03614e-08
Vamp1	2.82653e-11	0.268348	0.438	0.203	4.67622e-07
Stxbp1	3.48925e-18	0.267937	0.996	0.955	5.81205e-14
Tuba1b	1.05057e-11	0.267838	0.963	0.859	1.73911e-07
Tsr2	3.89476e-12	0.267621	0.768	0.467	6.45361e-08
Ackr1	1.21856e-13	0.267154	0.521	0.232	2.02233e-09
App	1.31226e-16	0.266592	0.996	0.955	2.18386e-12
Kif5c	1.89874e-11	0.26557	0.921	0.734	3.14203e-07
Hcrtr1	8.03421e-24	0.265069	0.243	0.02	1.3422e-19
Abat	4.82977e-11	0.263834	0.951	0.77	7.98843e-07
Cntn1	7.79249e-12	0.263569	0.985	0.863	1.29028e-07
Impact	7.14766e-22	0.263113	1	0.986	1.19287e-17
Gm16485	4.59353e-18	0.262505	0.33	0.08	7.65052e-14
Dcun1d4	4.34458e-10	0.26174	0.809	0.537	7.16682e-06
Epha10	3.6747e-16	0.261383	0.423	0.143	6.1136e-12
Rab6b	4.8396e-11	0.26033	0.944	0.793	8.00421e-07
Scn1b	7.60434e-10	0.259953	0.685	0.424	1.25297e-05
Dnm3	1.49622e-10	0.258	0.925	0.748	2.47191e-06
Srebf2	1.20078e-08	0.257829	0.693	0.449	0.000196941
Ube2j1	8.35515e-09	0.254549	0.712	0.492	0.000137192
Grik1	4.12625e-10	0.254425	0.682	0.395	6.80749e-06
Plekhb2	1.1737e-10	0.253933	0.929	0.754	1.93978e-06
Galnt16	7.51271e-11	0.251537	0.903	0.68	1.24223e-06
Oxct1	3.65338e-09	0.250755	0.779	0.545	6.00653e-05
Cadm3	4.27806e-09	0.250328	0.873	0.635	7.03184e-05
Adgrl2	1.65546e-12	0.248517	0.446	0.197	2.74443e-08
Arxes2	6.62449e-09	0.248464	0.846	0.637	0.00010882
Caln1	8.89295e-11	0.247896	0.483	0.23	1.47009e-06
Wdr1	1.88458e-09	0.247884	0.76	0.475	3.10183e-05
Clstn3	4.28931e-11	0.24727	0.921	0.707	7.09495e-07
Syn1	1.51872e-09	0.246474	0.858	0.656	2.50057e-05
Faim2	1.46271e-13	0.246199	0.978	0.928	2.42737e-09
Hs6st2	2.79024e-07	0.246171	0.547	0.332	0.00454558
Prkar1a	5.46604e-15	0.246063	0.996	0.957	9.08346e-11
Atp2b1	9.09175e-09	0.245729	0.925	0.738	0.000149232
Ar	2.82286e-07	0.244326	0.888	0.709	0.00459732
Ube2v2	1.43557e-10	0.24426	0.843	0.582	2.37184e-06
Camk2b	1.87282e-11	0.244077	0.966	0.854	3.09934e-07
Atp6v1a	1.40178e-15	0.243979	0.985	0.934	2.33116e-11
Sv2a	1.41521e-16	0.243411	1	0.947	2.35505e-12
Cygb	2.87271e-10	0.243195	0.757	0.461	4.74313e-06
mt-Cytb	1.99613e-27	0.242981	1	1	3.33573e-23
Ppp2r2c	5.82781e-10	0.242338	0.895	0.738	9.60657e-06
Gnas	2.83521e-15	0.24187	1	0.992	4.71268e-11
Mt3	2.72445e-11	0.241092	0.989	0.885	4.5076e-07
Cyb5b	1.05177e-10	0.24092	0.783	0.508	1.73847e-06
Slc5a5	1.83073e-10	0.24019	0.569	0.307	3.02401e-06
Rab3a	7.64505e-12	0.240036	0.978	0.869	1.26594e-07
Atp5b	4.56474e-09	0.238664	0.933	0.725	7.50261e-05
Fgf12	1.19084e-10	0.238416	0.678	0.377	1.96799e-06
Fam20b	6.07873e-10	0.238186	0.715	0.43	1.00196e-05
Nfe2l1	1.96947e-11	0.237946	0.921	0.699	3.25888e-07
Scoc	2.6236e-13	0.237813	0.974	0.873	4.35203e-09
Eps15	6.51128e-10	0.237799	0.659	0.373	1.07306e-05
Tppp	4.74827e-10	0.237769	0.91	0.711	7.83038e-06
Actr1b	7.98808e-09	0.237531	0.768	0.545	0.00013118
Mapk9	2.46693e-09	0.237396	0.813	0.605	4.0586e-05
Map2k4	3.00451e-10	0.237377	0.921	0.693	4.96044e-06
Dner	4.41159e-10	0.236687	0.91	0.693	7.27647e-06
Arhgef4	9.10685e-09	0.23668	0.843	0.588	0.000149471
Cntnap1	3.8288e-10	0.236246	0.517	0.258	6.3179e-06
Pdxk	6.18292e-09	0.236134	0.88	0.668	0.000101579
Nars	8.36544e-09	0.235905	0.854	0.59	0.000137344
Zmat4	3.03045e-10	0.235859	0.618	0.35	5.00297e-06
Rtn3	6.9033e-17	0.235642	1	0.975	1.14905e-12
Epm2a	3.90354e-12	0.235058	0.517	0.232	6.46777e-08
Uhmk1	4.43759e-10	0.233997	0.843	0.6	7.31892e-06
Copg1	4.19605e-08	0.233818	0.843	0.631	0.000686809
Got2	8.76853e-09	0.233806	0.828	0.613	0.000143944
Pde4b	5.52788e-11	0.233653	0.461	0.215	9.142e-07
Tmem35a	3.64428e-10	0.232412	0.738	0.461	6.01415e-06
Atp2a2	2.19674e-11	0.232365	0.963	0.805	3.63473e-07
Ubl3	2.8024e-07	0.232051	0.783	0.566	0.00456484
Kcnip1	9.88679e-10	0.232011	0.573	0.314	1.62835e-05
Greb1	6.02978e-19	0.229807	0.251	0.037	1.00486e-14
Rnd2	1.3232e-10	0.229516	0.727	0.41	2.18645e-06
Drp2	3.32022e-08	0.228916	0.487	0.273	0.000543752
Zfhx4	3.21266e-08	0.228717	0.85	0.59	0.00052617
Kcnh1	6.60011e-10	0.228088	0.457	0.225	1.08763e-05
Arhgdia	4.9753e-08	0.227924	0.876	0.658	0.000814008
Cbln4	2.08395e-09	0.227749	0.419	0.195	3.42935e-05
Map4	1.99218e-10	0.227255	0.951	0.75	3.29028e-06
Aplp2	1.96825e-09	0.227174	0.929	0.795	3.23934e-05
Aldoa	1.30982e-08	0.226488	0.929	0.764	0.000214798
Epb41l3	7.35221e-08	0.225463	0.876	0.633	0.00120194
Hspa4	3.12202e-09	0.224651	0.79	0.527	5.13478e-05
Ppia	2.4871e-13	0.22373	1	0.932	4.12586e-09
Nrip1	7.96367e-08	0.223206	0.517	0.297	0.00130158
Kcna6	4.0897e-09	0.22296	0.67	0.402	6.72305e-05
mt-Nd5	4.50166e-12	0.22286	0.985	0.861	7.45834e-08
Ppp2ca	2.11814e-10	0.222422	0.925	0.764	3.49811e-06
Hras	2.47718e-08	0.222353	0.918	0.709	0.000405836
Rac1	1.42516e-07	0.221907	0.936	0.797	0.00232615
Scd1	3.17799e-18	0.221873	0.266	0.047	5.29422e-14
Ptprm	3.40841e-09	0.221066	0.416	0.201	5.60444e-05
Pnma3	7.35324e-10	0.221009	0.7	0.414	1.21167e-05
Syt13	1.82282e-08	0.220513	0.843	0.594	0.000298797
Csnk1g2	6.77166e-11	0.220436	0.592	0.303	1.11976e-06
Bc1	1.72464e-09	0.22042	0.652	0.385	2.83893e-05
Smim13	8.2196e-08	0.220318	0.749	0.496	0.00134325
Nudt4	7.85516e-10	0.22023	0.528	0.27	1.29414e-05
Pkm	2.94712e-09	0.219989	0.978	0.873	4.84742e-05
Lpgat1	1.16605e-08	0.218593	0.846	0.592	0.000191279
Atp1b3	3.85714e-07	0.217701	0.768	0.568	0.00627557
Mfn2	1.26631e-08	0.217292	0.712	0.465	0.000207675
Clstn2	6.38374e-08	0.217157	0.333	0.16	0.00104419
Fam217b	2.30075e-08	0.216437	0.648	0.385	0.000376978
Cd24a	5.62302e-10	0.215491	0.36	0.152	9.27011e-06
Epm2aip1	3.16355e-09	0.215338	0.918	0.779	5.20277e-05
Kalrn	3.19408e-10	0.215299	0.79	0.479	5.27246e-06
Psd3	2.81816e-07	0.215098	0.794	0.566	0.00458994
Pde1a	6.37321e-09	0.214794	0.33	0.146	0.000104699
Limk1	6.29924e-10	0.214775	0.558	0.289	1.03824e-05
Nt5dc3	9.80513e-10	0.214714	0.573	0.314	1.6151e-05
Syndig1	2.19307e-13	0.213786	0.288	0.082	3.63852e-09
Ube2n	3.05471e-07	0.213766	0.876	0.678	0.00497429
Pcdh7	9.31385e-07	0.213487	0.959	0.832	0.0150959
Nell2	4.91169e-08	0.213384	0.637	0.393	0.00080365
Ran	7.01494e-08	0.213316	0.951	0.807	0.00114694
Pitpna	6.44263e-08	0.213284	0.813	0.594	0.00105376
Sall1	2.24291e-10	0.212399	0.232	0.07	3.70395e-06
Rab3c	2.7751e-07	0.211958	0.959	0.824	0.00452119
Slc25a12	5.42515e-09	0.211264	0.749	0.455	8.91623e-05
Vdac1	1.17431e-08	0.211142	0.888	0.68	0.000192611
Tcf25	3.62071e-10	0.210881	0.985	0.918	5.97562e-06
Dzank1	1.15373e-07	0.210582	0.944	0.801	0.00188404
Pfn2	3.85576e-10	0.210268	0.985	0.875	6.362e-06
Chst2	7.76405e-10	0.210143	0.382	0.162	1.27921e-05
Disp2	5.80439e-10	0.209977	0.974	0.885	9.56853e-06
Gabrb1	9.70229e-08	0.209789	0.978	0.857	0.00158497
Fgf13	7.70332e-08	0.209595	0.517	0.297	0.00125911
Lyrm9	4.09328e-09	0.209527	0.685	0.398	6.72853e-05
Prkcb	4.41742e-07	0.208964	0.779	0.514	0.00718185
Kcnab2	6.04242e-11	0.208378	0.423	0.188	9.99235e-07
Adgrl1	1.64254e-09	0.208328	0.97	0.844	2.70427e-05
Tango2	2.43649e-08	0.208261	0.757	0.488	0.000399195
Rangap1	1.56023e-08	0.20807	0.933	0.768	0.000255815
Aes	1.06872e-10	0.207443	0.978	0.838	1.76638e-06
Endod1	2.94546e-08	0.207292	0.667	0.406	0.000482496
Pcp4l1	5.32584e-14	0.20692	0.255	0.061	8.84197e-10
Gng13	1.87606e-09	0.206265	0.569	0.309	3.08799e-05
Fth1	4.10321e-20	0.205452	1	1	6.84169e-16
Phyhipl	3.63857e-07	0.205298	0.7	0.467	0.00592141
Ephb1	2.09501e-07	0.205229	0.506	0.285	0.0034155
Nacc2	1.22638e-10	0.204835	0.341	0.133	2.0266e-06
Trim32	8.11342e-08	0.204823	0.787	0.541	0.00132598
Camkv	7.22206e-08	0.204643	0.719	0.467	0.00118073
Tiparp	4.76699e-14	0.204591	0.266	0.066	7.9151e-10
Fstl1	1.57098e-11	0.203828	0.303	0.105	2.59997e-07
Nefm	1.16792e-09	0.202173	0.345	0.148	1.92321e-05
Fkbp5	4.29276e-16	0.202146	0.363	0.104	7.14144e-12
Tollip	1.64552e-07	0.202063	0.663	0.418	0.00268467
Pgm2l1	5.16968e-07	0.201488	0.918	0.762	0.00839764
Acsl3	1.48179e-07	0.201128	0.715	0.445	0.00241813
Ogfod1	7.59659e-07	0.201005	0.693	0.477	0.0123247
Usp46	9.59684e-08	0.200792	0.637	0.385	0.00156784
Clstn1	3.71763e-10	0.200681	0.985	0.896	6.13483e-06
Ubqln2	7.08972e-07	0.200258	0.865	0.707	0.0115066
Hk1	8.67171e-08	0.199928	0.738	0.492	0.00141704
1190002N15Rik	1.56344e-07	0.19984	0.386	0.195	0.00255121
Scamp1	2.09002e-08	0.199575	0.888	0.695	0.000342513
Camk2n2	1.91488e-07	0.199303	0.918	0.719	0.0031226
Galnt17	1.4352e-06	0.198696	0.502	0.311	0.0232403
Pou6f2	6.9078e-08	0.19695	0.255	0.102	0.00112949
Lancl3	5.87764e-12	0.196748	0.258	0.076	9.73573e-08
Unc13a	4.70672e-08	0.196643	0.566	0.32	0.000770207
Tenm2	3.23174e-07	0.196607	0.644	0.398	0.0052616
Grin2a	3.50199e-10	0.196403	0.401	0.174	5.78039e-06
Hprt	8.24458e-07	0.194688	0.824	0.576	0.0133694
Klc2	7.95201e-07	0.19418	0.727	0.453	0.0128966
Slc32a1	2.09698e-07	0.194084	0.929	0.756	0.0034185
Ppp3ca	1.18696e-07	0.193728	0.993	0.951	0.00193807
Khdrbs1	8.55185e-09	0.193311	0.839	0.555	0.000140396
Pkp4	1.95752e-07	0.193042	0.715	0.465	0.00319194
Atp5d	5.11815e-07	0.192747	0.73	0.492	0.00831494
Amigo2	2.97416e-08	0.192271	0.382	0.184	0.000487167
Map1b	1.13995e-12	0.19224	1	0.982	1.88993e-08
Synj1	1.05231e-08	0.191713	0.978	0.881	0.000172674
Acot7	2.16296e-06	0.191397	0.704	0.467	0.0349707
Pnkd	5.70892e-07	0.190827	0.685	0.471	0.00927186
Nrgn	4.41015e-08	0.190813	0.637	0.383	0.000721721
Cox5a	1.37725e-06	0.190578	0.757	0.537	0.022306
Glud1	3.66114e-08	0.19048	0.779	0.518	0.000599475
Myo5a	3.9236e-07	0.189648	0.891	0.645	0.0063833
Ppp3r1	4.98775e-10	0.189528	0.996	0.916	8.22431e-06
mt-Co1	2.22621e-29	0.189102	1	1	3.72133e-25
Acly	2.77192e-07	0.188956	0.7	0.438	0.00451629
Mapk10	2.2282e-06	0.188738	0.719	0.512	0.0360211
Tubb4a	3.13742e-07	0.187932	0.94	0.775	0.00510867
Serinc1	2.26879e-09	0.187918	0.993	0.961	3.73284e-05
Prkaca	3.95819e-07	0.186323	0.944	0.787	0.00643919
Abca3	5.50379e-09	0.186252	0.569	0.301	9.04493e-05
mt-Co3	4.99957e-25	0.186192	1	1	8.35378e-21
1110008P14Rik	2.5555e-06	0.186031	0.835	0.609	0.0412866
Aatk	2.53326e-07	0.185063	0.835	0.596	0.00412795
Apba2	2.79325e-07	0.183652	0.637	0.387	0.0045502
Htr7	2.76065e-09	0.183464	0.247	0.088	4.54126e-05
Stk39	1.56373e-08	0.18342	0.461	0.236	0.000256374
Doc2b	3.36085e-09	0.183109	0.434	0.205	5.52692e-05
Snx10	1.93591e-06	0.182989	0.801	0.586	0.0313094
Fasn	5.19445e-10	0.182375	0.618	0.324	8.56461e-06
Hnrnpd	4.88497e-07	0.182286	0.828	0.574	0.00793807
Tubb4b	2.05089e-07	0.182061	0.644	0.402	0.00334397
Cacng3	4.1674e-10	0.181727	0.3	0.111	6.87495e-06
Rasgrp2	7.22675e-09	0.181697	0.539	0.285	0.000118707
Ablim2	7.63968e-08	0.181348	0.521	0.289	0.00124878
Fut9	2.42335e-06	0.181263	0.775	0.529	0.0391589
Pdcd7	3.56297e-07	0.180315	0.637	0.391	0.00579908
Chst11	6.50635e-10	0.180206	0.408	0.18	1.07231e-05
2900011O08Rik	2.33079e-06	0.179921	0.873	0.695	0.0376749
Tubb3	6.2929e-07	0.17921	0.903	0.674	0.0102178
Camta2	9.42537e-07	0.178705	0.483	0.289	0.0152748
Bcl2l2	4.33483e-08	0.178644	0.551	0.295	0.000709481
Diras1	1.57322e-08	0.178532	0.543	0.297	0.000257914
Acat2	4.1912e-07	0.178085	0.476	0.266	0.00681573
Luzp1	9.85786e-09	0.177898	0.416	0.201	0.000161777
D430041D05Rik	3.74935e-07	0.177897	0.596	0.363	0.00610094
Asic2	3.7061e-08	0.177246	0.577	0.318	0.000606799
Hmgcr	1.44306e-07	0.177016	0.674	0.41	0.00235507
Spcs3	7.30761e-09	0.177009	0.412	0.193	0.000120028
Cyfip2	5.36375e-07	0.176787	0.955	0.842	0.00871234
mt-Nd4l	3.75855e-09	0.176751	0.944	0.719	6.17906e-05
Rnf14	1.61804e-06	0.176141	0.944	0.77	0.026188
Nrxn3	8.08342e-10	0.1758	1	0.996	1.33166e-05
Rnf112	5.04479e-07	0.175591	0.787	0.549	0.00819626
Eef1a2	5.24371e-08	0.175395	0.828	0.545	0.000857818
Map1lc3a	1.13067e-07	0.174589	0.944	0.84	0.00184661
Chp1	7.26739e-07	0.174535	0.876	0.627	0.0117928
Ndufb6	7.92424e-07	0.174247	0.539	0.311	0.0128523
Rnf145	1.3627e-07	0.173809	0.554	0.314	0.00222447
Abce1	3.49722e-07	0.173541	0.517	0.299	0.00569242
Sqle	2.26933e-08	0.172526	0.412	0.199	0.000371853
Stx1a	1.17413e-08	0.171439	0.449	0.223	0.000192592
Ppm1m	1.08814e-08	0.170938	0.375	0.176	0.000178542
Arhgef25	6.23955e-07	0.170853	0.577	0.346	0.0101324
Hsdl1	3.33928e-07	0.170822	0.547	0.314	0.00543602
Mllt11	2.9122e-08	0.170739	0.993	0.93	0.000477076
Rab11fip5	6.13766e-09	0.169743	0.554	0.281	0.000100848
Mc3r	1.82017e-10	0.16958	0.228	0.064	3.00674e-06
Gpr22	8.97812e-08	0.169499	0.337	0.156	0.00146694
Ctnnb1	2.67887e-06	0.168795	0.835	0.627	0.0432638
Rnd1	2.09942e-09	0.168714	0.382	0.166	3.4546e-05
Kcnc1	2.28381e-06	0.168672	0.82	0.588	0.0369178
Dnajc5	8.02632e-09	0.168493	0.996	0.941	0.0001318
Scn8a	1.88358e-07	0.16804	0.712	0.443	0.00307194
Lgi1	3.63695e-09	0.167676	0.483	0.236	5.97988e-05
Idh1	7.17733e-07	0.167176	0.472	0.268	0.0116474
Gas6	3.47927e-08	0.167023	0.371	0.172	0.000569766
Cyp51	5.60382e-09	0.166465	0.457	0.219	9.20876e-05
Phf24	7.0704e-07	0.166312	0.581	0.344	0.011476
Ap2a1	1.87255e-07	0.165521	0.569	0.33	0.00305413
Rell2	1.75145e-06	0.165293	0.663	0.408	0.0283384
Sept8	4.0012e-07	0.165201	0.727	0.455	0.00650795
Glra1	4.97224e-10	0.165108	0.232	0.07	8.19923e-06
Cnnm1	1.50852e-06	0.164579	0.697	0.451	0.0244244
Cyc1	5.03091e-07	0.164547	0.64	0.379	0.00817423
Fam124a	1.36399e-07	0.163736	0.288	0.123	0.00222645
Nap1l2	1.59541e-06	0.163588	0.573	0.35	0.025825
Fam81a	8.63602e-07	0.163206	0.375	0.193	0.013999
Rwdd2a	6.67201e-08	0.163098	0.442	0.227	0.00109107
Pafah1b2	3.07348e-06	0.162098	0.914	0.762	0.0496214
Sall2	2.50328e-07	0.161611	0.588	0.354	0.00407934
Psap	9.44836e-08	0.160269	1	0.961	0.00154367
Tacr1	1.02848e-08	0.160242	0.213	0.07	0.000168773
G3bp2	1.76331e-06	0.160214	0.974	0.877	0.0285285
Txndc5	5.02701e-07	0.160082	0.532	0.299	0.0081684
Atp1b1	6.14128e-09	0.159863	1	0.971	0.000100901
Cobl	8.39285e-07	0.159703	0.386	0.203	0.0136073
Mblac2	1.89482e-06	0.159102	0.712	0.463	0.0306487
Fdft1	6.47408e-07	0.158911	0.506	0.293	0.01051
Adcy7	2.70056e-07	0.158494	0.311	0.143	0.00440029
Ndufv2	3.04397e-06	0.158307	0.73	0.475	0.049148
Ywhae	3.37928e-09	0.157413	0.996	0.963	5.55688e-05
Sept6	7.56138e-08	0.156292	0.431	0.217	0.00123606
Etf1	2.21329e-07	0.156147	0.581	0.342	0.00360766
Socs2	1.65957e-09	0.155628	0.146	0.029	2.73215e-05
Lgi2	9.79709e-09	0.155396	0.311	0.125	0.00016079
Hrasls	7.41726e-07	0.155198	0.375	0.189	0.0120353
Vamp2	5.79263e-08	0.155134	0.993	0.965	0.000947558
Tex2	4.58842e-07	0.154094	0.61	0.357	0.00745756
Atp6v1b2	7.42549e-07	0.153731	0.959	0.887	0.0120479
Wrnip1	3.14885e-07	0.153383	0.468	0.246	0.00512696
Atp5a1	2.63852e-06	0.152969	0.94	0.824	0.0426174
Nefh	1.15946e-08	0.152867	0.326	0.137	0.000190221
Acsl4	2.08398e-06	0.152724	0.539	0.32	0.033698
Nsdhl	1.04535e-09	0.152571	0.225	0.068	1.72149e-05
Wnk3	7.9724e-07	0.151898	0.528	0.299	0.0129288
Tnfrsf19	4.68174e-12	0.151649	0.184	0.035	7.75577e-08
Ywhab	7.51613e-09	0.15123	0.996	0.984	0.000123445
Tbc1d22b	3.06645e-08	0.151193	0.408	0.191	0.000502254
Rfk	2.03394e-06	0.151096	0.554	0.332	0.0328909
Slc25a5	4.08102e-07	0.150727	0.442	0.23	0.00663696
Ptpn5	1.78433e-06	0.150244	0.809	0.572	0.0288668
Ifitm10	5.13069e-08	0.149839	0.303	0.129	0.000839381
Scml4	1.73815e-06	0.149005	0.412	0.221	0.0281251
Garnl3	1.55385e-06	0.148865	0.483	0.271	0.0251569
Mgat5b	1.04225e-09	0.148762	0.292	0.105	1.71648e-05
Tmem70	1.91622e-08	0.148711	0.397	0.184	0.000314068
9330182L06Rik	6.74041e-07	0.148705	0.457	0.244	0.010941
Tspan17	1.69501e-07	0.148262	0.483	0.26	0.00276524
Opn3	2.41849e-07	0.147343	0.217	0.084	0.00394141
Pou3f2	9.75713e-07	0.147258	0.221	0.09	0.0158114
Rgs8	5.80904e-07	0.14665	0.303	0.143	0.00943388
Ryr3	1.1094e-07	0.146226	0.307	0.135	0.00181199
Rab6a	1.10898e-06	0.145773	1	0.955	0.0179665
Wipf2	8.85935e-07	0.145358	0.629	0.385	0.0143601
Mir124-2hg	3.77535e-08	0.14512	0.419	0.207	0.0006181
Shisa4	1.42851e-07	0.144863	0.708	0.414	0.00233147
Snph	6.64651e-07	0.143213	0.577	0.33	0.0107893
Slc35a2	5.84261e-09	0.142289	0.33	0.133	9.60058e-05
Lrrc59	2.41701e-06	0.141818	0.386	0.207	0.0390589
Lypd6b	4.50617e-07	0.141555	0.288	0.129	0.00732477
Aldh5a1	2.6117e-06	0.141439	0.588	0.346	0.0421894
Rerg	1.36743e-09	0.141	0.228	0.072	2.25161e-05
Ranbp6	4.33016e-07	0.140885	0.472	0.252	0.00704084
Zfp385b	5.5106e-07	0.140225	0.333	0.158	0.00895032
Ddah1	2.57159e-06	0.140224	0.442	0.244	0.041544
Hsp90aa1	4.29805e-07	0.139147	0.985	0.961	0.00698906
Cdh22	3.99545e-07	0.138106	0.273	0.119	0.00649899
Setd7	8.33059e-07	0.137694	0.453	0.244	0.0135072
Laptm4b	2.92905e-06	0.137418	0.27	0.127	0.0472953
Manea	3.37557e-07	0.13725	0.412	0.205	0.00549475
Lrp11	1.43796e-06	0.137036	0.554	0.336	0.0232835
Lrrfip1	1.40042e-06	0.136554	0.337	0.166	0.0226784
Chml	3.23261e-07	0.136381	0.288	0.127	0.00526269
Atp6v0e2	2.02477e-06	0.13631	0.933	0.799	0.0327447
Calr	7.15841e-07	0.134849	0.951	0.76	0.0116174
Kcnq5	1.26665e-07	0.134469	0.247	0.096	0.00206794
Adcy3	4.71553e-07	0.134413	0.449	0.234	0.00766321
Ywhaz	1.66777e-06	0.133289	0.993	0.982	0.0269896
H1f0	7.73123e-07	0.132692	0.479	0.258	0.0125416
Spred2	1.05128e-06	0.132656	0.472	0.258	0.0170329
Kdm7a	8.58695e-07	0.131918	0.352	0.172	0.0139203
Cox8a	2.48739e-06	0.131589	0.996	0.977	0.0401888
3632451O06Rik	4.37129e-07	0.131362	0.281	0.119	0.00710729
Rpn2	1.57029e-06	0.129959	0.461	0.254	0.0254215
BC035947	8.35718e-09	0.128824	0.187	0.053	0.000137216
Dhcr7	3.48164e-08	0.128753	0.33	0.146	0.000570119
Calm1	1.15965e-07	0.128537	1	0.994	0.0018936
Pcdh8	3.63405e-07	0.127504	0.352	0.17	0.00591442
Syt3	1.02241e-06	0.126247	0.348	0.172	0.0165671
Carm1	1.61583e-07	0.12619	0.348	0.16	0.0026364
Lpcat4	1.21188e-07	0.1258	0.296	0.125	0.00197863
Syt7	2.88362e-06	0.124025	0.584	0.348	0.0465647
Tsr1	3.96308e-07	0.12336	0.236	0.094	0.00644674
Sptb	2.20108e-06	0.122717	0.341	0.17	0.0355848
Gprin3	1.27399e-06	0.120095	0.337	0.166	0.0206373
Fbxo2	1.63408e-06	0.119185	0.419	0.219	0.026446
Calm2	2.09672e-06	0.118739	1	0.994	0.0339019
Aen	2.38531e-06	0.11631	0.255	0.113	0.038549
Hyou1	7.6927e-07	0.111526	0.277	0.121	0.0124799
Disp3	3.93941e-08	0.110843	0.3	0.121	0.00064492
Tekt5	1.84492e-06	0.110823	0.199	0.076	0.0298453
Slit1	5.15218e-07	0.108192	0.243	0.1	0.00836971
Sntg1	2.37407e-07	0.107221	0.3	0.125	0.00386925
Serpina3n	1.59188e-06	0.10497	0.184	0.066	0.0257693
Chrna4	1.7723e-07	0.104864	0.146	0.039	0.0028908
Kcna1	9.32953e-07	0.103837	0.161	0.053	0.0151204
Patj	1.42849e-08	0.10273	0.169	0.045	0.000234229
2310057M21Rik	6.26746e-07	0.100186	0.337	0.156	0.0101771
St6galnac3	6.49392e-08	0.0993097	0.146	0.037	0.00106208
Gdpd2	7.52218e-09	0.0976781	0.251	0.086	0.000123537
Gm32014	4.06061e-07	0.0951568	0.146	0.041	0.00660418
Mpp3	1.89593e-06	0.0926164	0.277	0.123	0.0306647
Xrcc3	8.31992e-07	0.092129	0.195	0.07	0.0134908
Mvk	1.70727e-06	0.0909574	0.157	0.051	0.027627
Hsd17b7	3.74812e-07	0.0828898	0.127	0.031	0.00609932

## Sheet: male late trajectory
genes	p_val	avg_logFC	pct.1	pct.2	p_val_adjust	type
Nts	7.26509e-19	0.645492	0.566	0.322	1.23666e-14	shared
Napb	2.75615e-27	0.527748	0.985	0.914	4.69648e-23	male specific
Pgr	4.92746e-40	0.512814	0.814	0.402	8.40181e-36	shared
Parm1	1.18649e-27	0.489227	0.593	0.254	2.02201e-23	shared
Cntnap2	2.12868e-34	0.467226	0.926	0.711	3.62918e-30	other
Prkce	9.50801e-33	0.45798	0.907	0.648	1.62093e-28	shared
Lamp5	1.09958e-32	0.449226	0.419	0.096	1.87445e-28	other
Ptp4a1	8.97094e-32	0.447395	0.909	0.65	1.5291e-27	shared
Pdzrn4	2.04219e-27	0.415037	0.86	0.572	3.4801e-23	shared
Sv2c	1.18536e-18	0.405133	0.64	0.377	2.01748e-14	shared
Ctnna2	1.09495e-24	0.396387	0.782	0.479	1.86525e-20	other
1500009L16Rik	2.28269e-21	0.395608	0.792	0.514	3.88719e-17	other
Id4	1.15289e-20	0.394618	0.841	0.592	1.96292e-16	other
Ogfrl1	1.58839e-21	0.38544	0.858	0.611	2.70519e-17	shared
mt-Co2	1.76757e-81	0.382432	1	0.998	3.01459e-77	shared
Hmgcs1	7.2383e-19	0.381593	0.828	0.617	1.23218e-14	shared
Tmem35a	6.52633e-17	0.360398	0.708	0.461	1.11039e-12	shared
Irs4	5.96226e-23	0.350235	0.979	0.902	1.01555e-18	shared
Pak3	5.42275e-32	0.344901	0.994	0.938	9.24361e-28	shared
Nexmif	3.10588e-19	0.342361	0.716	0.424	5.28744e-15	other
Grik1	3.94853e-17	0.341496	0.678	0.395	6.71842e-13	shared
Maged1	3.0671e-25	0.335236	0.968	0.865	5.22541e-21	shared
Sez6l	8.62719e-19	0.331021	0.928	0.787	1.46843e-14	shared
Nos1	2.93566e-09	0.328902	0.572	0.398	4.96919e-05	male specific
Itm2c	8.4551e-31	0.308124	0.998	0.977	1.44109e-26	shared
mt-Atp6	1.40723e-65	0.307431	1	1	2.39989e-61	other
Irs2	6.39101e-18	0.30678	0.545	0.266	1.08762e-13	other
Nrip1	1.60703e-15	0.303942	0.542	0.297	2.73339e-11	shared
Gpr83	4.10465e-13	0.300884	0.239	0.074	6.97462e-09	other
mt-Nd2	1.77499e-38	0.286555	1	0.992	3.02637e-34	shared
Crim1	3.50337e-09	0.28176	0.712	0.531	5.92946e-05	other
Actg1	1.74162e-21	0.281213	0.996	0.906	2.96598e-17	other
Gal	3.34665e-10	0.279824	0.403	0.215	5.67225e-06	other
mt-Nd4	1.80325e-45	0.278908	1	0.998	3.07507e-41	shared
Gfra1	5.4155e-16	0.27799	0.568	0.297	9.21231e-12	shared
Map1a	2.3049e-15	0.275318	0.858	0.656	3.92018e-11	other
Gm16485	7.78527e-21	0.271804	0.314	0.08	1.3256e-16	shared
Dhcr24	3.21615e-16	0.265699	0.494	0.23	5.47163e-12	other
Hpcal1	2.62188e-12	0.263582	0.89	0.721	4.45196e-08	shared
Adra2a	3.29931e-14	0.263508	0.307	0.113	5.60883e-10	shared
Ap1s2	1.97462e-05	0.263099	0.583	0.459	0.328952	other
Ccnb1ip1	4.49003e-10	0.261996	0.379	0.195	7.60926e-06	male specific
Greb1	4.52952e-23	0.261243	0.259	0.037	7.71558e-19	other
Thy1	1.26432e-08	0.258476	0.858	0.742	0.000213759	shared
mt-Nd1	7.01489e-44	0.258085	1	1	1.19618e-39	other
Ankrd46	2.74159e-12	0.257498	0.773	0.555	4.65494e-08	other
Idi1	1.93349e-14	0.255729	0.392	0.17	3.28712e-10	other
Scd2	1.78861e-12	0.252213	0.955	0.852	3.03724e-08	shared
Pgam1	5.48637e-13	0.2515	0.913	0.746	9.32189e-09	other
Vsnl1	2.18349e-08	0.24882	0.805	0.688	0.000369031	other
Cdh4	3.31503e-16	0.248629	0.424	0.18	5.63953e-12	shared
Gnai1	1.08299e-10	0.247884	0.744	0.533	1.83674e-06	male specific
Syt6	1.35888e-10	0.246834	0.405	0.219	2.30424e-06	other
Camk4	9.8658e-11	0.244873	0.504	0.291	1.67344e-06	other
Fstl5	1.17237e-10	0.243827	0.881	0.707	1.98823e-06	other
Tmem215	2.70017e-13	0.236732	0.263	0.09	4.5884e-09	other
Lynx1	2.95374e-10	0.236165	0.659	0.439	5.00688e-06	shared
Chst11	4.27919e-15	0.235955	0.417	0.18	7.27719e-11	shared
Ets2	1.72253e-12	0.232927	0.733	0.486	2.92538e-08	shared
Drp2	3.27628e-11	0.23269	0.485	0.273	5.55985e-07	shared
Ywhah	1.99878e-18	0.232134	0.994	0.965	3.40173e-14	shared
Fgfr1	3.06757e-06	0.231801	0.634	0.463	0.0514585	other
Ldlr	1.84145e-17	0.231707	0.348	0.117	3.13359e-13	other
Pcp4	2.24154e-06	0.230262	0.996	0.977	0.0376287	shared
Fam171b	4.31582e-11	0.23024	0.917	0.793	7.32264e-07	other
Nudt4	9.81956e-13	0.227585	0.519	0.27	1.66785e-08	other
Map2k1	4.90976e-11	0.226055	0.841	0.639	8.3294e-07	other
Hs3st2	1.96417e-20	0.223569	0.197	0.018	3.344e-16	other
Msmo1	6.46239e-10	0.222795	0.589	0.379	1.09479e-05	other
Kif5a	1.28254e-12	0.222517	0.932	0.777	2.17827e-08	other
Spock1	3.12811e-07	0.222073	0.794	0.676	0.00526868	male specific
Socs2	1.25536e-14	0.22157	0.176	0.029	2.13436e-10	shared
Hapln4	5.60168e-12	0.219756	0.441	0.229	9.5094e-08	shared
Tspyl4	1.09342e-13	0.217449	0.972	0.898	1.85849e-09	other
Pappa	7.89382e-14	0.213874	0.203	0.047	1.34187e-09	other
Abat	1.65694e-11	0.21324	0.932	0.77	2.81217e-07	other
Arf3	1.7702e-12	0.212862	0.981	0.875	3.00615e-08	other
mt-Nd3	7.38788e-16	0.211811	0.991	0.945	1.25668e-11	shared
Apoc3	3.54119e-12	0.210573	0.47	0.232	6.01223e-08	shared
Calm3	5.74976e-13	0.209022	0.989	0.926	9.76884e-09	other
Aldoc	1.12458e-07	0.205235	0.504	0.336	0.00189773	shared
Hs3st5	1.1016e-09	0.204524	0.498	0.295	1.86578e-05	shared
Ogdh	5.84935e-10	0.203923	0.748	0.516	9.90996e-06	other
Ctnnb1	6.53478e-09	0.202036	0.826	0.627	0.000110542	other
Tnfrsf21	4.64678e-10	0.201989	0.597	0.363	7.87444e-06	male specific
Ubl3	9.25198e-08	0.201922	0.741	0.566	0.00156155	other
Tiparp	5.18929e-15	0.201665	0.248	0.066	8.82439e-11	other
Csnk1g2	4.74078e-11	0.201117	0.544	0.303	8.0432e-07	other
Syndig1l	2.49534e-10	0.200865	0.239	0.092	4.23036e-06	male specific
mt-Cytb	1.86628e-26	0.200341	1	1	3.17977e-22	other
Brinp2	4.28641e-10	0.200259	0.61	0.375	7.2646e-06	shared
Nell2	4.64641e-09	0.200041	0.6	0.393	7.86173e-05	male specific
Stk19	3.00207e-08	0.199269	0.511	0.318	0.00050717	other
Pdha1	8.10829e-09	0.198589	0.665	0.441	0.000137127	other
Map2k4	1.19622e-10	0.196917	0.888	0.693	2.02855e-06	other
Srebf2	5.66871e-08	0.196886	0.663	0.449	0.000957161	other
Insig1	1.66209e-09	0.195927	0.475	0.271	2.81425e-05	other
Dynll2	6.63582e-15	0.194988	0.998	0.979	1.12835e-10	male specific
Hcrtr1	2.69534e-17	0.192778	0.176	0.02	4.58639e-13	other
Rap1gds1	2.12323e-07	0.192234	0.688	0.504	0.00357849	other
Idnk	1.58208e-08	0.191938	0.449	0.266	0.000267451	shared
Tsr2	2.35406e-09	0.190667	0.699	0.467	3.98519e-05	other
Lyrm9	1.58459e-09	0.190515	0.625	0.398	2.68319e-05	other
Elmo1	2.682e-06	0.189175	0.652	0.471	0.0450093	shared
Rspo1	2.79414e-08	0.188935	0.36	0.205	0.000472098	other
Eif1b	9.64255e-11	0.188798	0.975	0.891	1.63567e-06	other
Dgkb	8.88268e-09	0.187991	0.735	0.506	0.000150206	other
Nat8l	1.63689e-07	0.187757	0.663	0.479	0.00276094	other
Psd3	1.25521e-07	0.187694	0.741	0.566	0.00211804	other
Hras	1.50655e-08	0.186592	0.873	0.709	0.000254698	male specific
Zmat4	7.79793e-08	0.185672	0.527	0.35	0.00131621	other
Sytl4	1.87265e-10	0.185378	0.121	0.02	3.17527e-06	other
Ipo5	1.08696e-07	0.184751	0.545	0.361	0.00183436	male specific
Tuba1b	8.27346e-09	0.184384	0.947	0.859	0.000139913	other
AF529169	6.89573e-13	0.18397	0.248	0.076	1.17152e-08	other
Fgf12	1.72016e-08	0.183744	0.593	0.377	0.000290775	other
Hsph1	4.2315e-08	0.183664	0.877	0.725	0.000714573	other
Sult4a1	1.64078e-07	0.18334	0.848	0.674	0.00276733	other
Cdkl5	2.00593e-07	0.183183	0.578	0.379	0.0033816	other
Camk2b	1.07653e-09	0.182603	0.949	0.854	1.82342e-05	other
Pnma3	4.80899e-10	0.181392	0.659	0.414	8.14883e-06	other
Rasgrf2	0.000909266	0.180913	0.67	0.582	1	other
Sccpdh	1.8278e-07	0.179499	0.648	0.457	0.00308186	shared
Ube2j1	7.48644e-06	0.178377	0.64	0.492	0.125211	other
Pcsk1n	0.00260449	0.178315	0.994	0.992	1	other
Rab6b	2.58686e-08	0.178194	0.928	0.793	0.000437128	other
Ids	3.2382e-06	0.177324	0.896	0.781	0.0543079	other
Bend6	5.86151e-06	0.176706	0.778	0.645	0.0981276	other
Hspa12a	1.90446e-08	0.176646	0.496	0.299	0.000321892	other
mt-Nd5	5.27978e-12	0.176475	0.973	0.861	8.96348e-08	other
Dnm3	6.9307e-08	0.175923	0.902	0.748	0.00117004	other
Adgrl1	5.28049e-10	0.175753	0.958	0.844	8.94727e-06	other
Phyhipl	2.21915e-07	0.175666	0.665	0.467	0.0037397	other
Ecel1	1.0474e-06	0.175063	0.735	0.559	0.0176079	shared
Trp53i11	6.33482e-06	0.174963	0.354	0.223	0.106026	other
Eef1b2	7.88639e-10	0.174808	0.966	0.857	1.33595e-05	shared
Ywhag	8.67214e-14	0.174473	1	0.99	1.47409e-09	other
Kcnk2	3.6131e-05	0.174136	0.79	0.668	0.599847	other
Phactr1	2.02822e-07	0.173804	0.642	0.459	0.00341877	male specific
Prkar1b	1.91649e-09	0.173465	0.992	0.939	3.2448e-05	other
Rab3c	3.67771e-06	0.172949	0.926	0.824	0.0616604	other
Fkbp5	1.19044e-14	0.172405	0.311	0.104	2.0241e-10	male specific
mt-Co3	3.6579e-27	0.171274	1	1	6.2327e-23	other
Hcn1	8.40634e-06	0.17103	0.534	0.373	0.140529	other
Tpt1	2.82803e-10	0.17089	0.987	0.924	4.79407e-06	shared
Got1	1.94461e-07	0.170265	0.712	0.514	0.00327843	shared
Ppia	1.0777e-11	0.170065	0.987	0.932	1.8294e-07	other
Epm2a	3.20609e-09	0.169469	0.43	0.232	5.42662e-05	other
Stx7	9.49705e-07	0.169402	0.782	0.623	0.0159683	male specific
Gpr101	0.000399933	0.169297	0.43	0.314	1	other
Dcp2	2.0864e-07	0.168698	0.532	0.33	0.00351663	other
Prkacb	1.54571e-09	0.168519	0.998	0.975	2.6175e-05	other
Caln1	2.02075e-07	0.167737	0.4	0.23	0.00340638	male specific
Magi1	1.6868e-06	0.167192	0.788	0.627	0.0283281	other
Atp1b3	5.38998e-06	0.166076	0.725	0.568	0.0902713	other
Nefh	2.29931e-10	0.165652	0.311	0.137	3.89825e-06	other
Cltc	2.93973e-07	0.164755	0.962	0.865	0.00495198	other
Cplx1	0.00081159	0.164734	0.398	0.291	1	other
Gabra5	3.17975e-08	0.163776	0.453	0.262	0.000537154	male specific
Galnt17	2.85903e-06	0.163711	0.466	0.311	0.0479745	male specific
Arf1	3.75713e-08	0.163689	0.943	0.85	0.000634618	male specific
Hspa4	2.82823e-08	0.163408	0.731	0.527	0.000477829	other
Acvr1c	1.60304e-13	0.163357	0.131	0.012	2.72421e-09	male specific
Scrn1	1.11686e-06	0.162865	0.881	0.758	0.0187722	other
Kdm7a	1.0583e-09	0.161905	0.356	0.172	1.79265e-05	other
Pid1	0.000106853	0.161677	0.504	0.367	1	other
Stk39	3.53014e-09	0.161073	0.428	0.236	5.9744e-05	male specific
Wnt4	2.33999e-06	0.159753	0.284	0.16	0.0392744	other
Idh1	6.20773e-08	0.159134	0.447	0.268	0.00104805	male specific
Scml4	4.13029e-08	0.159109	0.4	0.221	0.000697564	shared
Eif4g2	3.31632e-10	0.159004	0.983	0.945	5.62116e-06	other
Stard4	2.51606e-09	0.158979	0.282	0.125	4.25918e-05	other
Arxes2	5.49957e-06	0.158908	0.801	0.637	0.0920957	other
Arhgdia	2.95557e-06	0.158737	0.835	0.658	0.0495827	other
Rnd2	2.32936e-07	0.15857	0.633	0.41	0.00392521	other
Ran	1.8346e-06	0.157875	0.922	0.807	0.0308047	other
Tac2	0.000218498	0.157841	0.091	0.035	1	other
1110008P14Rik	5.78095e-07	0.157594	0.805	0.609	0.00972819	shared
Pcp4l1	1.00447e-10	0.156742	0.199	0.061	1.70368e-06	other
Camkv	7.28252e-07	0.156558	0.659	0.467	0.0122463	male specific
Ddhd1	0.000141422	0.155618	0.46	0.336	1	other
Ccdc92	2.53379e-05	0.155351	0.657	0.502	0.421547	other
Aes	3.72794e-09	0.155225	0.958	0.838	6.3088e-05	male specific
Ina	5.55001e-06	0.15519	0.892	0.785	0.0929349	other
Ube2v2	1.72213e-07	0.154341	0.771	0.582	0.00290421	male specific
Timp2	2.74787e-07	0.153452	0.964	0.914	0.00462934	male specific
Park2	3.91788e-08	0.153267	0.33	0.166	0.000661729	other
Pcdh7	4.32603e-05	0.152964	0.919	0.832	0.717385	other
Dlk1	0.332984	0.152534	0.267	0.242	1	other
Spock3	0.00136552	0.152292	0.746	0.645	1	other
Slitrk6	1.92278e-10	0.151976	0.193	0.059	3.26007e-06	shared
Cd83	4.07224e-06	0.151802	0.496	0.328	0.0682467	other
Nefl	6.07663e-06	0.151682	0.676	0.516	0.101717	other
Syn2	1.39271e-05	0.1516	0.932	0.812	0.232374	other
Hsp90b1	2.28807e-06	0.15151	0.818	0.705	0.0384076	other
Ube2n	1.91378e-05	0.151272	0.83	0.678	0.318913	other
Rnf157	2.87529e-06	0.150689	0.625	0.434	0.0482415	male specific
Cadps2	7.06096e-05	0.150343	0.364	0.244	1	other
Minos1	1.25912e-06	0.150212	0.898	0.818	0.021157	other
Syn1	9.59783e-06	0.149875	0.801	0.656	0.160389	other
Khdrbs1	1.67901e-07	0.149649	0.763	0.555	0.00283165	male specific
Aatk	5.87702e-07	0.149427	0.79	0.596	0.00988927	other
mt-Co1	3.14578e-25	0.149245	1	1	5.35914e-21	other
Tmem50b	7.44888e-06	0.148997	0.606	0.432	0.124597	other
Hmgcr	7.08454e-07	0.148549	0.608	0.41	0.0119162	other
Oxct1	0.000132767	0.148451	0.682	0.545	1	other
Map1b	1.44546e-11	0.148169	1	0.982	2.45352e-07	other
Tspan17	1.16434e-08	0.147976	0.458	0.26	0.000196867	other
Map1lc3a	4.26426e-07	0.147712	0.93	0.84	0.00717803	other
2900097C17Rik	4.8472e-09	0.147151	0.991	0.98	8.20098e-05	other
Map4	7.48844e-08	0.146961	0.915	0.75	0.00126412	other
Chst2	3.05202e-07	0.146567	0.312	0.162	0.00514083	other
Rbms3	0.00326102	0.1463	0.409	0.311	1	other
Hs2st1	0.000171845	0.145768	0.678	0.502	1	other
Nr2f2	0.000165514	0.145361	0.576	0.432	1	other
Kalrn	1.50413e-07	0.14529	0.705	0.479	0.00253747	other
Scn1b	1.39948e-05	0.145272	0.589	0.424	0.233489	other
Atp2b1	4.66019e-05	0.144487	0.866	0.738	0.772613	other
Rbbp7	8.34123e-05	0.143327	0.566	0.404	1	other
Hspa8	5.52782e-07	0.143181	0.985	0.947	0.00930333	shared
Myh10	3.27032e-06	0.142512	0.744	0.529	0.0548433	other
Vip	0.0510277	0.141637	0.045	0.023	1	other
Stx1b	5.6583e-05	0.141503	0.839	0.701	0.936901	other
Tuba4a	6.72876e-06	0.141314	0.758	0.572	0.112599	other
Gad2	8.0304e-06	0.141108	0.972	0.953	0.134276	other
Syndig1	3.99322e-09	0.140858	0.218	0.082	6.75693e-05	shared
Scd1	1.462e-11	0.139467	0.184	0.047	2.48145e-07	other
Grin3a	0.00115727	0.138958	0.443	0.324	1	other
Sqle	3.23023e-08	0.138955	0.377	0.199	0.00054565	shared
Cyb5b	7.11433e-06	0.1385	0.689	0.508	0.119023	other
Atp5d	1.92377e-05	0.137553	0.667	0.492	0.320558	other
Kif5c	5.0981e-06	0.136907	0.86	0.734	0.0853983	other
Vamp1	1.79209e-06	0.136677	0.35	0.203	0.0300946	other
Scoc	1.89523e-07	0.136557	0.953	0.873	0.00319535	male specific
Plekhb2	3.51578e-05	0.136495	0.892	0.754	0.583865	other
Nars	8.74145e-05	0.136297	0.756	0.59	1	other
Ndrg4	3.30926e-06	0.135578	0.972	0.955	0.055493	other
H2-Q2	9.27287e-07	0.135061	0.227	0.109	0.0155923	shared
Epm2aip1	1.21139e-05	0.134893	0.886	0.779	0.202242	other
Hnrnpd	2.58051e-06	0.13464	0.777	0.574	0.0433087	male specific
Prkar1a	6.84557e-07	0.134604	0.983	0.957	0.0115156	male specific
Ptprm	5.07748e-06	0.13455	0.341	0.201	0.085058	other
Mapk10	2.85669e-05	0.134514	0.678	0.512	0.474867	other
Rnf145	6.93404e-06	0.134497	0.479	0.314	0.116013	other
Gap43	3.49303e-07	0.134472	0.998	0.975	0.00588156	male specific
Camk2n2	5.23682e-05	0.134416	0.854	0.719	0.86748	other
Copg1	0.000145125	0.134164	0.777	0.631	1	other
Lhfpl3	1.07249e-06	0.133986	0.4	0.24	0.0180275	shared
Spcs3	2.17426e-07	0.133541	0.358	0.193	0.00366427	other
Cfap36	2.72048e-07	0.133185	0.544	0.332	0.00458347	other
Tpi1	0.000389348	0.133013	0.845	0.742	1	other
Eno2	0.000137408	0.132917	0.939	0.834	1	other
Ppp2r2c	0.000101168	0.132822	0.854	0.738	1	other
Galnt16	1.80447e-05	0.13273	0.831	0.68	0.300752	other
Glyr1	0.000219012	0.132632	0.775	0.621	1	other
Cstf2	1.44069e-06	0.132528	0.597	0.398	0.0242022	other
Clstn2	5.17604e-06	0.132388	0.288	0.16	0.0866935	other
Carm1	6.68928e-09	0.132353	0.331	0.16	0.000113143	other
Ppp3ca	3.6018e-05	0.131717	0.989	0.951	0.598007	other
Ngb	0.000150078	0.131532	0.771	0.621	1	other
Lrp1b	2.74403e-05	0.131466	0.928	0.824	0.45636	other
Col25a1	7.71072e-05	0.131358	0.398	0.26	1	other
Rcn1	1.87095e-05	0.131307	0.451	0.309	0.311794	other
Uqcrb	1.51845e-05	0.131206	0.797	0.623	0.253278	other
Asic2	6.86654e-07	0.130408	0.513	0.318	0.0115502	other
Hprt	8.1902e-06	0.130118	0.795	0.576	0.136932	other
Arhgef4	8.19491e-05	0.129747	0.767	0.588	1	other
Epha10	1.04928e-06	0.129744	0.275	0.143	0.0176384	other
Zfp385b	1.43108e-06	0.129523	0.295	0.158	0.0240421	other
Rangap1	5.53061e-05	0.129367	0.89	0.768	0.91587	other
Eif5a	3.21722e-05	0.129262	0.917	0.787	0.534509	other
Ar	0.000376389	0.129206	0.837	0.709	1	other
Abca3	3.4868e-07	0.129168	0.496	0.301	0.00587143	other
Mapk3	1.77146e-05	0.129034	0.561	0.4	0.295267	other
Dner	7.22874e-05	0.128959	0.826	0.693	1	other
Wdr1	7.15437e-05	0.128944	0.653	0.475	1	other
Slc12a5	4.24653e-05	0.12843	0.939	0.848	0.704287	other
Stxbp1	5.9285e-06	0.128398	0.994	0.955	0.0992431	other
Tubb4b	3.2917e-05	0.128143	0.566	0.402	0.546751	other
Fasn	4.27208e-08	0.128111	0.542	0.324	0.000721383	other
Nova1	0.00011157	0.127699	0.644	0.469	1	other
Atp2a2	4.15628e-06	0.127628	0.92	0.805	0.0696509	other
Eef2	1.61859e-06	0.127398	0.972	0.906	0.0271858	shared
Got2	0.000336426	0.127213	0.742	0.613	1	other
Mrap2	0.018115	0.127142	0.424	0.355	1	other
Setd7	1.16696e-06	0.126782	0.407	0.244	0.0196108	male specific
Nsf	1.80365e-06	0.126597	0.975	0.928	0.0302869	male specific
Kcnab2	1.124e-06	0.126391	0.331	0.188	0.0188911	male specific
Cntnap4	3.10734e-05	0.12633	0.536	0.359	0.516316	other
Rpl12	1.7704e-05	0.126243	0.998	0.98	0.295108	other
Tatdn1	8.33711e-06	0.126141	0.57	0.375	0.13938	other
Pcmt1	0.000979849	0.126013	0.811	0.646	1	other
Snap25	4.12184e-05	0.125147	0.983	0.936	0.683648	other
Tmem179	0.000366998	0.124694	0.833	0.695	1	other
Ablim2	5.43965e-06	0.124293	0.456	0.289	0.0910979	other
Prkcb	0.000304645	0.124172	0.678	0.514	1	other
Tollip	1.08005e-05	0.12408	0.595	0.418	0.180379	other
Rwdd2a	4.81656e-07	0.124053	0.398	0.227	0.00810723	other
Tcf25	3.94472e-05	0.123897	0.979	0.918	0.654547	other
Cox5a	4.06825e-05	0.123758	0.703	0.537	0.674841	other
Disp2	8.14097e-06	0.123517	0.966	0.885	0.136117	other
Cul4a	2.86678e-06	0.123423	0.411	0.252	0.0481017	other
Ryr2	2.98559e-05	0.123292	0.485	0.328	0.496145	other
Ppp2ca	1.01331e-05	0.12311	0.892	0.764	0.169283	other
Chn1	0.000361404	0.122894	0.778	0.619	1	other
Pebp1	4.83748e-05	0.122671	0.934	0.84	0.801618	other
Chml	6.50433e-07	0.122411	0.258	0.127	0.0109429	shared
Limk1	4.7594e-06	0.122254	0.456	0.289	0.0797342	other
Slitrk5	3.24378e-05	0.121821	0.659	0.467	0.538857	other
Scamp1	3.88746e-06	0.121694	0.847	0.695	0.0651577	other
Ssx2ip	1.14695e-05	0.121485	0.625	0.428	0.191518	other
Ajap1	5.29409e-07	0.121314	0.244	0.115	0.00891048	male specific
Rnf112	2.27292e-05	0.121095	0.731	0.549	0.378396	other
Ubqln2	0.00135737	0.12104	0.795	0.707	1	other
Atp6v1a	6.62075e-06	0.120651	0.979	0.934	0.110798	other
Srxn1	3.67644e-05	0.1205	0.455	0.299	0.610289	other
Rgs7bp	3.81955e-06	0.120452	0.316	0.178	0.0640271	other
Dcun1d4	0.000160429	0.120062	0.705	0.537	1	other
Sipa1l1	2.22366e-05	0.119904	0.479	0.314	0.37024	other
Prlr	0.000728668	0.119871	0.894	0.797	1	other
Mblac2	5.76082e-06	0.119586	0.672	0.463	0.0964534	other
Fam20b	7.54093e-05	0.119446	0.606	0.43	1	other
Nfe2l1	1.33009e-05	0.119437	0.858	0.699	0.221965	other
Slc35a2	7.83626e-09	0.11926	0.297	0.133	0.000132535	other
Ap2a1	1.61581e-05	0.119119	0.494	0.33	0.269452	other
Cib2	0.000295948	0.119095	0.71	0.559	1	other
Hk1	0.000131166	0.119009	0.65	0.492	1	other
Fut8	3.60108e-05	0.118922	0.587	0.408	0.597924	other
Zwint	9.87163e-06	0.11884	0.992	0.98	0.164935	other
Ptcd3	1.75487e-05	0.118697	0.301	0.176	0.292554	other
Smap1	2.11082e-05	0.118605	0.54	0.375	0.351536	other
Nap1l3	3.89594e-05	0.118357	0.629	0.455	0.646571	other
Snn	0.000294214	0.118201	0.631	0.471	1	other
Htr1b	1.25165e-05	0.118069	0.403	0.252	0.208951	other
Unc13a	1.26477e-05	0.117728	0.489	0.32	0.211103	other
Ywhae	2.69688e-08	0.117682	0.994	0.963	0.000455692	male specific
Htr7	1.98773e-06	0.117543	0.193	0.088	0.0333739	other
Snx10	0.000108036	0.117209	0.748	0.586	1	other
Phlda1	6.03083e-05	0.117193	0.218	0.121	0.998163	other
Cdc27	2.79685e-05	0.117103	0.426	0.275	0.465032	other
Eef1a2	3.77693e-06	0.117066	0.756	0.545	0.0633165	other
Adcy3	3.58785e-07	0.116923	0.415	0.234	0.0060405	other
Fxyd7	1.73365e-05	0.116607	0.508	0.344	0.289035	other
Fut9	8.27362e-05	0.116521	0.712	0.529	1	other
Cyp51	1.0615e-05	0.116379	0.367	0.219	0.177303	other
Ola1	2.02735e-05	0.116339	0.561	0.379	0.337656	other
Tmcc3	0.000582131	0.116324	0.82	0.693	1	other
Sgsm1	0.000149081	0.115904	0.807	0.666	1	other
Mfn2	2.93449e-05	0.11561	0.636	0.465	0.487684	other
Guk1	6.93696e-05	0.115567	0.871	0.734	1	other
Cntn1	0.000845307	0.11534	0.949	0.863	1	other
Ttbk2	0.000310553	0.115247	0.775	0.635	1	other
Kcns2	0.00037751	0.115172	0.348	0.238	1	other
Abce1	1.19967e-05	0.115103	0.456	0.299	0.200297	other
Cdkl2	2.58751e-05	0.114971	0.616	0.439	0.430432	other
Sar1a	4.55665e-05	0.114952	0.723	0.527	0.755492	other
Iqsec3	9.56121e-05	0.114722	0.682	0.516	1	other
Slc25a12	2.54928e-05	0.114588	0.657	0.455	0.424098	other
Dzank1	0.00055299	0.114312	0.909	0.801	1	other
Pkm	0.000470254	0.114208	0.962	0.873	1	other
Pcyox1	0.00179206	0.114167	0.633	0.498	1	other
Glud1	2.59858e-05	0.114068	0.693	0.518	0.432222	other
Faim2	2.02531e-05	0.113968	0.968	0.928	0.337335	other
Rtn3	4.23469e-06	0.113828	0.994	0.975	0.0709608	other
Kcnh1	0.00019262	0.113617	0.339	0.225	1	other
Acat2	2.74959e-05	0.113593	0.415	0.266	0.457257	other
Eps15	4.87612e-05	0.113261	0.549	0.373	0.807973	other
Nap1l2	1.95904e-05	0.113129	0.519	0.35	0.326416	other
Ube2z	4.7815e-05	0.112944	0.581	0.402	0.792534	other
Fth1	2.28514e-09	0.112516	1	1	3.86874e-05	male specific
mt-Nd4l	5.61265e-07	0.112358	0.898	0.719	0.00944554	male specific
Rad23b	0.000544285	0.112345	0.803	0.699	1	other
Hsdl1	2.49844e-05	0.11201	0.475	0.314	0.41574	other
Actr1b	0.000913283	0.11197	0.678	0.545	1	other
Smoc1	7.7198e-08	0.111854	0.167	0.059	0.0013031	other
Dlgap1	0.00238232	0.111852	0.591	0.467	1	other
Nbea	0.000571128	0.111697	0.822	0.705	1	other
Synj1	3.28313e-05	0.111694	0.975	0.881	0.545361	other
Nipsnap3b	3.51659e-06	0.111242	0.193	0.088	0.0589661	other
Mtmr6	4.72765e-05	0.111033	0.667	0.473	0.783703	other
Selenof	7.83934e-05	0.110992	0.688	0.514	1	other
Kcnd2	0.000327677	0.110983	0.657	0.5	1	other
Ryr3	7.17118e-07	0.110741	0.271	0.135	0.0120612	other
Lancl3	3.68078e-06	0.110735	0.172	0.076	0.0617083	other
Fkbp4	0.000386477	0.110517	0.623	0.465	1	other
Uhmk1	7.94403e-05	0.11046	0.756	0.6	1	other
Pts	1.25451e-05	0.11016	0.33	0.195	0.209415	other
Frmd5	2.7762e-06	0.109977	0.208	0.098	0.0465874	other
Sphkap	5.42938e-05	0.109951	0.462	0.309	0.899159	other
Ret	0.000175945	0.109922	0.216	0.121	1	other
Nrp1	0.000773205	0.109841	0.422	0.299	1	other
Kcnq1ot1	7.79526e-05	0.10975	0.987	0.902	1	other
Nme1	0.00141747	0.109412	0.824	0.699	1	other
Gas6	6.89569e-06	0.109326	0.307	0.172	0.115379	other
Lrrfip2	9.74778e-05	0.109159	0.411	0.271	1	other
Mapk9	0.000518968	0.108982	0.727	0.605	1	other
Med28	0.000356585	0.108631	0.837	0.707	1	other
Hars	5.79311e-06	0.108469	0.381	0.223	0.0969883	other
Maf	8.7034e-06	0.108352	0.157	0.066	0.145469	other
Aen	1.40952e-06	0.108338	0.233	0.113	0.0236827	other
Hyou1	7.239e-07	0.108302	0.252	0.121	0.0121738	other
Acly	0.000177379	0.10788	0.616	0.438	1	other
Kcnc1	0.000464986	0.107825	0.737	0.588	1	other
Sv2a	4.06701e-06	0.10762	0.994	0.947	0.0681631	other
2010107E04Rik	0.00127066	0.107529	0.809	0.695	1	other
Fgfr1op2	0.000155015	0.107477	0.642	0.451	1	other
Tnxb	3.32677e-07	0.107303	0.104	0.025	0.00560228	other
Ndufs6	0.00100968	0.107171	0.716	0.539	1	other
Hrasls	7.33967e-06	0.107065	0.33	0.189	0.122778	other
Mrpl10	0.000178462	0.107014	0.373	0.244	1	other
Eif1a	9.0469e-05	0.106972	0.612	0.432	1	other
Tcaf1	0.000132865	0.106888	0.924	0.783	1	other
Eef1e1	6.54831e-05	0.106647	0.494	0.34	1	other
Tacr1	2.01534e-05	0.106343	0.155	0.07	0.335696	other
Pgk1	0.000384602	0.106246	0.638	0.484	1	other
Nrsn1	2.19439e-05	0.10611	0.996	0.977	0.36541	other
Nt5dc3	2.84444e-05	0.105966	0.47	0.314	0.472859	other
Cap2	9.4471e-06	0.105959	0.491	0.314	0.157889	other
Dhcr7	1.03142e-06	0.105901	0.278	0.146	0.0173402	other
Ndufb6	3.4928e-05	0.105842	0.477	0.311	0.580084	other
Prkag2	5.58393e-06	0.105516	0.356	0.209	0.0934973	other
Zbtb20	0.0787504	0.10526	0.93	0.918	1	other
Enah	0.00721995	0.105199	0.905	0.812	1	other
Chtop	0.000690355	0.105105	0.64	0.482	1	other
Mc3r	3.22182e-07	0.104703	0.172	0.064	0.00542619	male specific
Tmem183a	0.000572484	0.104546	0.593	0.447	1	other
Nyap1	0.000506587	0.104463	0.652	0.508	1	other
Astn1	0.000853884	0.104261	0.928	0.807	1	other
Rpn2	1.13011e-05	0.10424	0.405	0.254	0.188717	other
Gabra2	0.00459479	0.104229	0.777	0.648	1	other
Epb41l3	0.0017686	0.10422	0.775	0.633	1	other
Pdcd7	0.000179502	0.104194	0.551	0.391	1	other
Cyc1	5.13894e-05	0.104185	0.562	0.379	0.851316	other
Prkaca	0.000284207	0.104164	0.917	0.787	1	other
Tex2	2.76276e-05	0.103731	0.527	0.357	0.459419	other
Mrps18a	7.00667e-05	0.103726	0.506	0.346	1	other
Gpd2	3.67319e-05	0.103695	0.587	0.402	0.609786	other
Tmx2	0.000664189	0.103513	0.828	0.688	1	other
Tppp	0.00442578	0.103427	0.831	0.711	1	other
C2cd2l	0.000418862	0.103364	0.479	0.332	1	other
Fam124a	7.92507e-05	0.103094	0.223	0.123	1	other
Klc2	0.00131847	0.102942	0.625	0.453	1	other
Ptpn5	0.00022011	0.102291	0.733	0.572	1	other
Dmrtc1a	3.24733e-07	0.102238	0.18	0.07	0.00546883	other
Mark4	6.75906e-06	0.102119	0.348	0.201	0.113099	other
Mrfap1	8.71038e-05	0.102106	0.998	0.969	1	other
Shisa4	1.83265e-05	0.102085	0.61	0.414	0.30543	other
Rac1	0.00838014	0.102071	0.902	0.797	1	other
Pdia6	0.000222761	0.101994	0.506	0.357	1	other
Fam217b	0.000854762	0.101953	0.527	0.385	1	other
Dock10	7.17935e-06	0.101753	0.197	0.094	0.120103	other
Scn2b	0.00158726	0.10173	0.788	0.666	1	other
Lpgat1	0.00080357	0.101485	0.752	0.592	1	other
App	0.000468045	0.101339	0.987	0.955	1	other
Col4a3bp	7.79301e-06	0.101163	0.5	0.311	0.130315	other
Tsnax	0.00150203	0.10109	0.697	0.553	1	other
Doc2b	2.2258e-05	0.101076	0.345	0.205	0.370574	other
Wrnip1	1.04578e-05	0.100383	0.407	0.246	0.174687	other
Stx1a	1.63831e-05	0.100172	0.366	0.223	0.273188	other
Nefm	3.351e-05	0.0998678	0.259	0.148	0.556568	other
Unc5b	5.81064e-05	0.0997789	0.153	0.072	0.961952	other
Pfn2	0.000129069	0.0997459	0.956	0.875	1	other
Etf1	7.64157e-06	0.0997052	0.521	0.342	0.12779	other
Smyd2	0.000304564	0.0995699	0.426	0.301	1	other
Copb2	3.17102e-06	0.0995321	0.265	0.139	0.0531843	other
Cpe	0.00156368	0.0993844	0.951	0.895	1	other
Cygb	0.000361108	0.0993133	0.631	0.461	1	other
Igf1r	0.00024868	0.0991065	0.39	0.262	1	other
Ywhaq	0.000123384	0.0989885	0.953	0.889	1	other
Ak4	0.000108407	0.09898	0.409	0.268	1	other
Sall1	0.00020134	0.0987602	0.144	0.07	1	other
Adarb1	0.000135152	0.0986666	0.456	0.311	1	other
Idh3a	0.00182473	0.098555	0.718	0.582	1	other
Reln	0.0372098	0.0985101	0.127	0.088	1	other
Ank1	3.76354e-05	0.0983691	0.278	0.162	0.624634	other
Opn3	5.972e-05	0.0982564	0.169	0.084	0.988485	other
Fam107a	9.66277e-06	0.0981385	0.309	0.174	0.161455	other
Sall2	8.57361e-05	0.0980612	0.506	0.354	1	other
Sephs2	0.000735896	0.098033	0.413	0.293	1	other
Tmem246	0.00140548	0.0979533	0.502	0.367	1	other
Glrx5	0.000853152	0.0978144	0.655	0.506	1	other
Elmo2	2.5082e-05	0.0977268	0.388	0.24	0.41734	other
Neo1	0.00248212	0.0977192	0.426	0.316	1	other
Usp46	0.000828792	0.0975163	0.525	0.385	1	other
Disp3	1.47295e-07	0.0974847	0.263	0.121	0.00248502	other
Pef1	5.95226e-05	0.0973862	0.32	0.195	0.985278	other
Cartpt	0.0158121	0.0972501	0.157	0.107	1	other
Wsb2	0.000520158	0.0971815	0.667	0.49	1	other
Trak1	0.000136457	0.096968	0.434	0.291	1	other
Cobl	8.68525e-05	0.0969623	0.326	0.203	1	other
Dlg3	3.90743e-05	0.0968195	0.415	0.266	0.648438	other
Rell2	0.000662693	0.0964398	0.561	0.408	1	other
Fbxl17	2.3832e-05	0.0963874	0.347	0.209	0.39666	other
Chpt1	0.000513459	0.0963772	0.422	0.295	1	other
Phb	0.000204895	0.0963252	0.46	0.312	1	other
Lcorl	0.00214224	0.0963006	0.309	0.211	1	other
Gria1	0.000705587	0.0962296	0.831	0.713	1	other
Endod1	0.000611362	0.0962018	0.561	0.406	1	other
Lrp11	1.97572e-05	0.0960622	0.494	0.336	0.329116	other
Trim32	0.00131866	0.0960073	0.706	0.541	1	other
Bcl2l2	6.11257e-05	0.0958717	0.456	0.295	1	other
Ncdn	0.024902	0.095857	0.79	0.715	1	other
Cops7a	1.15979e-05	0.0958542	0.485	0.312	0.193651	other
Ppp1r2	0.00100379	0.095796	0.75	0.588	1	other
Tgfb2	0.000273992	0.0957161	0.106	0.045	1	other
Gdap1l1	0.000110266	0.0950622	0.411	0.268	1	other
Sntg1	3.53274e-07	0.0948028	0.267	0.125	0.00594808	other
Emb	0.00210362	0.0947178	0.366	0.26	1	other
Spon1	0.00765192	0.094657	0.345	0.26	1	other
Sacs	2.43752e-05	0.0946216	0.328	0.193	0.405652	other
Fbxo9	0.00163974	0.0945912	0.761	0.629	1	other
Slit1	3.84565e-06	0.0944871	0.208	0.1	0.0644607	other
Serinc1	0.000461072	0.0944494	0.996	0.961	1	other
Tbc1d9b	3.97675e-05	0.0943785	0.373	0.23	0.659822	other
Mrpl20	0.000105573	0.094331	0.545	0.385	1	other
Chp1	0.000287104	0.0941575	0.797	0.627	1	other
Hcfc1r1	8.392e-05	0.0941563	0.604	0.428	1	other
Slc6a17	0.000555379	0.0940569	0.831	0.699	1	other
Pde4b	0.000585168	0.0938752	0.326	0.215	1	other
Vps13c	5.87139e-05	0.0936783	0.396	0.246	0.971949	other
Slc5a5	0.000796718	0.0936452	0.424	0.307	1	other
Whrn	0.00052038	0.0936427	0.231	0.141	1	other
Rab3a	0.00045585	0.0935586	0.949	0.869	1	other
Atp6v1g2	0.00346624	0.0935226	0.875	0.756	1	other
E2f6	0.00045436	0.0932016	0.316	0.205	1	other
Cntnap1	0.000667518	0.0931741	0.381	0.258	1	other
Dld	0.000460666	0.0930839	0.434	0.301	1	other
Fbxo45	0.000566111	0.0930603	0.381	0.252	1	other
Inpp5f	0.00556575	0.0928937	0.903	0.789	1	other
5730455P16Rik	0.001845	0.0928906	0.614	0.477	1	other
Fat3	0.00154428	0.0928372	0.405	0.289	1	other
Acot7	0.00206875	0.0925417	0.617	0.467	1	other
Pdia3	0.00030222	0.0923758	0.553	0.393	1	other
Tubb3	0.000497118	0.0923363	0.83	0.674	1	other
Aldoa	0.0042133	0.0923289	0.873	0.764	1	other
2610002M06Rik	0.000166024	0.0923083	0.405	0.268	1	other
Dscam	0.000780717	0.091989	0.617	0.455	1	other
Tmem30a	0.000737235	0.09187	0.917	0.836	1	other
Amotl1	0.000412855	0.0917796	0.633	0.449	1	other
Diaph3	1.63877e-05	0.0917003	0.237	0.125	0.273249	other
Arl2bp	0.00144171	0.0916797	0.82	0.666	1	other
Snap47	0.00474964	0.0914927	0.864	0.727	1	other
Rtn2	7.23496e-05	0.0913924	0.443	0.287	1	other
Rap1gap	0.00106002	0.091356	0.67	0.518	1	other
Edf1	0.0015201	0.0913334	0.64	0.488	1	other
Fgf13	0.00580934	0.0911372	0.392	0.297	1	other
Slc25a30	3.54745e-05	0.0909463	0.214	0.111	0.589089	other
Eif4e	0.0042096	0.0909442	0.775	0.66	1	other
Ttc39b	1.04206e-05	0.0909146	0.307	0.174	0.174076	other
Tceal9	0.00119096	0.090864	0.92	0.828	1	other
Pitpna	0.0028124	0.0908609	0.725	0.594	1	other
Krt222	5.77061e-05	0.0905359	0.284	0.166	0.955382	other
Dpp6	0.00109178	0.0905174	0.896	0.777	1	other
Odc1	0.000869007	0.0904232	0.587	0.418	1	other
Cdr2	9.52073e-06	0.0902547	0.193	0.092	0.15911	other
Elovl6	0.00286979	0.090213	0.517	0.389	1	other
Gm17018	0.000652458	0.0900043	0.788	0.631	1	other
Rtcb	0.00256182	0.089879	0.608	0.455	1	other
Strip1	0.000188918	0.0898768	0.379	0.244	1	other
Map2	0.00149525	0.0895585	0.983	0.916	1	other
Cnnm1	0.000844106	0.0895031	0.612	0.451	1	other
Ergic1	0.000538645	0.0894833	0.682	0.506	1	other
Herc2	0.00313341	0.0894488	0.659	0.506	1	other
Uqcc2	0.00271849	0.0892688	0.886	0.719	1	other
Nol6	8.85046e-05	0.0892485	0.398	0.26	1	other
Trp53inp2	4.03343e-05	0.0892291	0.383	0.23	0.669186	other
Spred2	1.08835e-05	0.0890234	0.42	0.258	0.181755	other
Cckar	0.000151066	0.0889146	0.205	0.113	1	other
Srsf12	0.000835437	0.088808	0.398	0.273	1	other
Neurl4	4.82469e-05	0.0887914	0.258	0.145	0.799548	other
Coq10b	1.26167e-05	0.088786	0.223	0.113	0.210598	other
Setd3	0.000548337	0.0886843	0.642	0.475	1	other
Cbx5	0.0099345	0.0886726	0.93	0.848	1	other
Tmem250-ps	8.51982e-05	0.0886144	0.432	0.281	1	other
Tubb2a	0.00495693	0.0884506	0.729	0.574	1	other
Psmb10	0.000127944	0.0884093	0.521	0.35	1	other
Pdxk	0.003377	0.0883519	0.794	0.668	1	other
Adpgk	1.69254e-05	0.0881781	0.259	0.141	0.282197	other
Eif4g3	0.00547477	0.0881293	0.799	0.691	1	other
Vps4a	0.00268961	0.0879201	0.47	0.342	1	other
0610010F05Rik	0.000118406	0.0877996	0.42	0.271	1	other
Sept8	0.00044496	0.0875788	0.634	0.455	1	other
Sec11c	0.000329196	0.087208	0.432	0.291	1	other
Smim13	0.00815732	0.087116	0.631	0.496	1	other
Nsdhl	1.43788e-05	0.0869348	0.157	0.068	0.239881	other
Mib1	0.000342735	0.086815	0.502	0.342	1	other
Atp5b	0.00719089	0.0866542	0.864	0.725	1	other
Tpd52	0.000339445	0.0865813	0.496	0.342	1	other
Phf24	0.00032553	0.0865709	0.492	0.344	1	other
Akt1	0.000230911	0.086492	0.551	0.379	1	other
Pafah1b2	0.00264755	0.0864544	0.877	0.762	1	other
Rab2a	0.00288387	0.0862487	0.864	0.775	1	other
Gng13	0.000564963	0.0862196	0.439	0.309	1	other
Rhou	6.44567e-06	0.0861218	0.239	0.121	0.107875	other
Pitpnc1	0.003582	0.0861089	0.578	0.439	1	other
Grsf1	2.52359e-05	0.0860058	0.574	0.377	0.419875	other
Ndfip2	0.00162128	0.0858855	0.578	0.438	1	other
E130309D02Rik	3.15196e-05	0.0858237	0.178	0.086	0.523698	other
Myo5a	0.0070334	0.0858093	0.786	0.645	1	other
Ccdc97	9.70481e-05	0.0857473	0.288	0.172	1	other
Oprl1	0.0178079	0.0857303	0.621	0.516	1	other
Cep83	0.000200823	0.085727	0.229	0.133	1	other
Smap2	0.000769474	0.0855587	0.674	0.506	1	other
Lrrfip1	0.000180777	0.0855393	0.277	0.166	1	other
H1f0	5.00024e-05	0.0854673	0.415	0.258	0.828489	other
Gpr153	3.23341e-05	0.0854212	0.235	0.127	0.537166	other
Gnptab	0.00404365	0.0853801	0.341	0.244	1	other
Bnip3	0.000320612	0.0853558	0.441	0.303	1	other
Tsr1	7.56265e-06	0.0853405	0.199	0.094	0.126478	other
Ctps	6.13287e-05	0.0852758	0.337	0.203	1	other
Mt3	0.00298275	0.0851305	0.966	0.885	1	other
Wnk3	0.000161412	0.0849677	0.449	0.299	1	other
Atp1a1	0.000732448	0.0849327	0.602	0.438	1	other
Hnrnpul2	0.00826729	0.0848799	0.767	0.645	1	other
Ankib1	0.0010116	0.0848412	0.396	0.277	1	other
Miga1	5.55204e-05	0.084817	0.652	0.457	0.919363	other
Yeats4	0.000986875	0.0846791	0.413	0.285	1	other
Tmem70	9.91793e-06	0.0846167	0.326	0.184	0.165699	other
Fdps	0.00131891	0.0846082	0.242	0.156	1	other
Luzp1	0.000124703	0.0844917	0.32	0.201	1	other
Actr3	0.00159219	0.0844876	0.752	0.609	1	other
AC101921.1	1.52361e-05	0.0842954	0.157	0.068	0.254124	other
Unc5d	0.00263131	0.0842724	0.854	0.707	1	other
Slc30a9	0.00106448	0.084057	0.826	0.664	1	other
Ube2f	0.000175666	0.0840015	0.341	0.219	1	other
Usp5	0.00523125	0.0839883	0.581	0.439	1	other
Grb2	0.00504214	0.0839763	0.79	0.652	1	other
Sema5a	0.00418999	0.0839234	0.205	0.135	1	other
Clstn3	0.00356573	0.0837976	0.826	0.707	1	other
Jph3	0.000217367	0.0835818	0.598	0.432	1	other
Tfam	3.57486e-05	0.0834274	0.322	0.189	0.593606	other
Zfyve9	0.000269852	0.0833398	0.328	0.211	1	other
Tmem59l	0.00165031	0.083258	0.72	0.562	1	other
Rdh11	1.7645e-05	0.0831546	0.155	0.068	0.294142	other
Cfl1	0.00203274	0.0830815	0.97	0.922	1	other
Pfkfb3	0.000609705	0.0829814	0.184	0.105	1	other
Rapgef4	0.0008779	0.0829242	0.347	0.23	1	other
Acsl5	1.44317e-05	0.0828543	0.182	0.086	0.240736	other
Atp5k	0.00401594	0.082798	0.884	0.771	1	other
Agfg2	4.42894e-05	0.082762	0.297	0.174	0.734408	other
9330182L06Rik	0.000166315	0.0826749	0.377	0.244	1	other
Pdcd4	0.00188571	0.082624	0.858	0.721	1	other
Pwwp2a	0.000455749	0.0826062	0.322	0.209	1	other
Dapk1	0.00109363	0.0825885	0.538	0.379	1	other
Ranbp6	6.71334e-05	0.0825871	0.4	0.252	1	other
St8sia3	0.00664907	0.0825329	0.758	0.607	1	other
Lamb3	2.217e-05	0.0824639	0.112	0.041	0.369152	other
Nuak1	0.00210428	0.0823898	0.347	0.238	1	other
Cotl1	0.0021502	0.0823887	0.428	0.312	1	other
Pkp4	0.00128393	0.0823884	0.627	0.465	1	other
Dynlt3	0.00730113	0.0823085	0.532	0.412	1	other
Efemp1	1.0615e-05	0.0821926	0.076	0.018	0.177292	other
Saraf	0.00198604	0.0821391	0.928	0.857	1	other
Acsl3	0.00330097	0.0820438	0.598	0.445	1	other
Fam84a	9.09142e-05	0.081933	0.472	0.322	1	other
Tnfrsf19	9.85161e-07	0.0819048	0.117	0.035	0.0165635	other
Arxes1	8.34904e-05	0.0818758	0.498	0.334	1	other
Snf8	0.00269376	0.0818559	0.538	0.398	1	other
Fam8a1	0.00148167	0.0816109	0.778	0.615	1	other
Paics	7.40111e-05	0.0815678	0.405	0.258	1	other
Zfand5	0.0239282	0.0814694	0.699	0.574	1	other
Hpcal4	0.00616577	0.0813862	0.828	0.705	1	other
Erich3	1.96853e-05	0.0813434	0.377	0.227	0.327957	other
Syt13	0.00932936	0.081337	0.723	0.594	1	other
Etnk1	0.00208755	0.081214	0.926	0.812	1	other
Olfm3	0.00642333	0.0811679	0.642	0.518	1	other
Fkbp2	0.0162882	0.0811481	0.744	0.613	1	other
Nkrf	7.77911e-05	0.0811385	0.237	0.131	1	other
Slc32a1	0.00317554	0.081116	0.89	0.756	1	other
Hspa5	0.00371652	0.0810731	0.727	0.578	1	other
Mllt11	0.00116454	0.0810375	0.977	0.93	1	other
Sdc3	0.00445377	0.0810268	0.697	0.539	1	other
Impact	0.00116013	0.0810077	0.998	0.986	1	other
Arl1	0.00376831	0.080973	0.576	0.428	1	other
6430548M08Rik	0.0017174	0.0807962	0.634	0.48	1	other
Gde1	0.000499808	0.0807564	0.633	0.467	1	other
Lonrf2	0.0123343	0.0807286	0.951	0.91	1	other
Atp8a1	0.0162414	0.0806645	0.826	0.709	1	other
Lrrc59	0.000221425	0.0805799	0.326	0.207	1	other
Mfsd6	0.00461886	0.0804805	0.703	0.541	1	other
Reep5	0.00120403	0.0803783	0.951	0.857	1	other
Nploc4	5.75073e-05	0.080171	0.303	0.18	0.952148	other
Myrip	0.000109264	0.0799844	0.174	0.09	1	other
Tmem41b	4.08241e-05	0.079957	0.449	0.287	0.677149	other
1810030O07Rik	0.000727325	0.0799516	0.275	0.176	1	other
Tmem9b	0.00162448	0.0798993	0.46	0.322	1	other
Coprs	0.000590593	0.0797701	0.619	0.453	1	other
Mlf2	0.00628335	0.0797283	0.82	0.674	1	other
Mindy3	8.90996e-05	0.0796709	0.364	0.227	1	other
Nxn	4.67632e-05	0.0795117	0.136	0.059	0.775241	other
Ap3m1	0.000344815	0.0795022	0.263	0.16	1	other
Rpl18	0.0121406	0.0794757	0.983	0.963	1	other
Tmem160	2.27957e-05	0.0794629	0.278	0.154	0.37948	other
Pcmtd1	0.00698613	0.0794462	0.553	0.422	1	other
Ogfod1	0.0041664	0.0793274	0.61	0.477	1	other
Camta2	0.0010506	0.0792603	0.405	0.289	1	other
Ndrg3	0.00197578	0.0791972	0.852	0.713	1	other
Bc1	0.00168277	0.0791781	0.515	0.385	1	other
Mapre1	0.00235653	0.0791372	0.682	0.537	1	other
Manea	3.70468e-05	0.0789977	0.347	0.205	0.61494	other
Cetn2	0.0018025	0.0789963	0.386	0.271	1	other
Mrps2	2.88878e-05	0.0789826	0.214	0.109	0.480144	other
Slc25a5	0.000244771	0.0789675	0.364	0.23	1	other
Aak1	0.00173694	0.0789253	0.837	0.67	1	other
Gdi2	0.00191858	0.0788857	0.837	0.684	1	other
Zyg11b	0.00342136	0.0787434	0.756	0.613	1	other
Tmem164	3.16756e-06	0.07873	0.222	0.104	0.0531295	other
Ubqln1	0.00135101	0.0787294	0.746	0.59	1	other
Aldh9a1	0.000732213	0.0785699	0.233	0.141	1	other
Fbxo2	0.000158297	0.0785136	0.352	0.219	1	other
Rab1a	0.0056192	0.0784596	0.888	0.775	1	other
Lhfpl4	0.00136145	0.0784433	0.801	0.631	1	other
Taf9b	0.00031751	0.0783669	0.256	0.156	1	other
Tbc1d30	0.000348428	0.078302	0.339	0.213	1	other
Fbxo31	0.000600301	0.0780203	0.377	0.248	1	other
Wdr26	0.00995647	0.0779855	0.631	0.488	1	other
Panx2	9.42918e-05	0.0779185	0.273	0.162	1	other
Fam81a	0.00178969	0.0778899	0.292	0.193	1	other
Mrs2	0.000267529	0.0778024	0.312	0.191	1	other
Adgrl2	0.00158825	0.0777782	0.288	0.197	1	other
Pde4dip	0.00635898	0.0777617	0.481	0.352	1	other
Mrpl13	0.000201589	0.0777231	0.297	0.184	1	other
Nrxn3	0.000674951	0.0776718	0.998	0.996	1	other
Capzb	0.00173482	0.0776096	0.733	0.578	1	other
Clint1	0.000355576	0.0775944	0.379	0.244	1	other
Dzip1	0.000916797	0.0775223	0.511	0.361	1	other
Cul1	0.00411808	0.0774708	0.492	0.367	1	other
Sc5d	0.000761262	0.0773702	0.434	0.299	1	other
Zcchc18	0.00226718	0.0773278	0.987	0.947	1	other
Pnpo	0.000956809	0.0772613	0.299	0.195	1	other
Txndc5	0.000813871	0.0771993	0.436	0.299	1	other
Phyhip	0.00958256	0.0770949	0.633	0.484	1	other
Atxn7l1	7.67414e-05	0.0770319	0.335	0.205	1	other
Ccm2	0.0012503	0.0769984	0.322	0.213	1	other
Ackr1	0.00077963	0.0769744	0.347	0.232	1	other
Gabrb3	0.00417219	0.0769402	0.858	0.721	1	other
Kcnip1	0.00174673	0.0769274	0.441	0.314	1	other
Fabp5	0.00707824	0.0768931	0.555	0.43	1	other
Tor1aip2	0.000695142	0.0768291	0.383	0.256	1	other
Arl6	0.000889228	0.0767645	0.362	0.244	1	other
Dgke	0.000612676	0.0766917	0.403	0.268	1	other
5031439G07Rik	5.05643e-05	0.0766166	0.536	0.35	0.837749	other
Lgi2	0.000136654	0.0765587	0.227	0.125	1	other
Btbd1	0.000461379	0.076389	0.562	0.398	1	other
Wars	0.00067096	0.0763305	0.411	0.281	1	other
Khdrbs3	0.00126856	0.0762793	0.479	0.334	1	other
Tmbim6	0.00105757	0.0762595	0.797	0.656	1	other
Pgd	4.05705e-05	0.0761711	0.271	0.152	0.673025	other
Asb13	4.2696e-05	0.0761345	0.259	0.141	0.70807	other
Rasgrp2	0.000202392	0.0759275	0.43	0.285	1	other
Adam11	0.0016537	0.0758778	0.326	0.221	1	other
Gdpd2	5.86909e-08	0.0758636	0.216	0.086	0.000990937	other
Tmx3	0.00165165	0.0758526	0.549	0.408	1	other
Me1	0.00594214	0.0757728	0.265	0.182	1	other
Cdc42bpa	0.00712393	0.0757459	0.688	0.531	1	other
Pim3	7.88802e-05	0.0757441	0.297	0.176	1	other
Ndufv2	0.00270716	0.0757372	0.623	0.475	1	other
Dnajc15	0.00132133	0.0757297	0.462	0.328	1	other
Glo1	0.00596092	0.0756748	0.472	0.346	1	other
Tulp4	0.00178942	0.0756507	0.896	0.762	1	other
Fdft1	0.00150038	0.0756454	0.409	0.293	1	other
Clvs1	0.000550383	0.0756448	0.379	0.256	1	other
Phf6	0.000995232	0.0755779	0.415	0.291	1	other
Mgat5b	3.93451e-05	0.0755142	0.206	0.105	0.652893	other
Ipmk	8.81657e-05	0.0754843	0.294	0.174	1	other
Atp6v1d	0.00618811	0.0754827	0.718	0.584	1	other
Eif4e2	0.000121357	0.0754175	0.367	0.229	1	other
Nipa2	0.000124822	0.0753769	0.259	0.15	1	other
Nell1	0.0155474	0.0753384	0.502	0.402	1	other
Fam199x	0.000528037	0.0751971	0.411	0.275	1	other
Eloc	0.0013206	0.0751749	0.716	0.541	1	other
Ndufs4	0.000847632	0.0751434	0.513	0.359	1	other
Rab7	0.015013	0.0750461	0.83	0.697	1	other
Fam19a5	0.025809	0.0749982	0.676	0.555	1	other
Sdha	0.0102938	0.0749712	0.824	0.723	1	other
G3bp2	0.0047253	0.0749681	0.955	0.877	1	other
Dnah1	0.000216068	0.0748699	0.237	0.137	1	other
Cspg5	0.00257518	0.0748664	0.811	0.676	1	other
Ncald	0.013818	0.0747972	0.708	0.574	1	other
Arhgef25	0.00106447	0.0747531	0.487	0.346	1	other
Nr2c2ap	0.00121539	0.0745088	0.312	0.207	1	other
Tuba1a	0.00625055	0.0744462	0.936	0.818	1	other
Fstl1	0.00092975	0.0744334	0.18	0.105	1	other
Fam69a	0.000524834	0.074427	0.233	0.141	1	other
Nudt10	0.00911352	0.074238	0.498	0.383	1	other
Kcnq5	0.00101692	0.0741763	0.17	0.096	1	other
Vdac1	0.00148455	0.0740592	0.824	0.68	1	other
Mast4	0.018378	0.0740275	0.536	0.434	1	other
Mrpl17	0.00322626	0.0739875	0.42	0.297	1	other
Fxyd2	0.0112496	0.0738533	0.326	0.238	1	other
Nrcam	0.00422399	0.073845	0.434	0.32	1	other
Nampt	0.000131788	0.0736733	0.331	0.205	1	other
Gm32014	3.08075e-06	0.0736522	0.123	0.041	0.0516766	other
Plxnc1	0.00649596	0.0736206	0.621	0.49	1	other
Akap12	0.00167676	0.0735938	0.18	0.107	1	other
Sde2	0.000171534	0.0735379	0.354	0.217	1	other
Nacc2	0.000420959	0.0734191	0.225	0.133	1	other
Trnp1	0.00111389	0.073172	0.29	0.188	1	other
B230217O12Rik	0.000399289	0.0730498	0.206	0.119	1	other
Bcl2l13	0.000113194	0.0729932	0.216	0.117	1	other
Kcnb1	0.00266885	0.0728814	0.525	0.383	1	other
Abcf1	0.00174878	0.072824	0.402	0.281	1	other
Miga2	0.000488145	0.0727179	0.352	0.23	1	other
Ddx54	3.71049e-05	0.0726915	0.17	0.08	0.615867	other
4933431E20Rik	0.000892456	0.0726886	0.352	0.24	1	other
Rps24	0.000756974	0.0726011	1	0.998	1	other
Pde12	6.70771e-05	0.072475	0.199	0.104	1	other
Hivep1	0.000886094	0.07243	0.239	0.148	1	other
Cyfip2	0.00438537	0.072408	0.896	0.842	1	other
Eif4a1	0.0286748	0.0724043	0.82	0.713	1	other
Cmpk1	0.00879063	0.0723234	0.638	0.494	1	other
Scarb2	0.00111514	0.0722854	0.581	0.41	1	other
Glrx2	0.00730072	0.0721927	0.445	0.332	1	other
Gclm	0.00116285	0.0721447	0.396	0.27	1	other
Fkbp1a	0.0164133	0.0721097	0.96	0.912	1	other
Tenm2	0.00607808	0.0720925	0.523	0.398	1	other
Naa38	0.00470306	0.0720899	0.593	0.441	1	other
Tcerg1l	0.00123907	0.0720403	0.261	0.17	1	other
Rnf208	0.00227092	0.0719992	0.761	0.635	1	other
Zbtb7a	0.00678367	0.0719931	0.744	0.59	1	other
Dyrk2	0.000220248	0.0719722	0.28	0.166	1	other
Stt3b	0.00403111	0.0719541	0.288	0.199	1	other
Coq10a	0.000270511	0.0719474	0.244	0.145	1	other
Tango2	0.00389114	0.0718445	0.634	0.488	1	other
Ric8a	4.78602e-05	0.0718317	0.275	0.154	0.793235	other
Rassf5	0.00110951	0.0718261	0.278	0.178	1	other
Surf2	0.000190026	0.071708	0.358	0.223	1	other
Baalc	0.000347437	0.0715823	0.438	0.283	1	other
Npy1r	0.0075323	0.0715278	0.237	0.164	1	other
Csnk1d	0.000828944	0.0714765	0.699	0.527	1	other
Gnl1	0.00172906	0.071447	0.54	0.381	1	other
Ppp2r5c	0.0253325	0.0713721	0.695	0.551	1	other
Plcl1	2.1394e-05	0.0713423	0.227	0.119	0.356274	other
Ppm1l	0.0270205	0.0713232	0.544	0.43	1	other
Sptbn1	0.00460346	0.0712324	0.947	0.893	1	other
Spg20	0.000956103	0.0711489	0.318	0.207	1	other
Chrnb2	0.0031479	0.0710679	0.464	0.328	1	other
Tbc1d22b	0.000129058	0.0709898	0.316	0.191	1	other
Cdh22	0.000593771	0.0709374	0.205	0.119	1	other
Mfng	0.0018914	0.0708363	0.106	0.053	1	other
Hsd17b7	4.51913e-06	0.0708027	0.104	0.031	0.0757225	other
Ggct	0.000201118	0.0707798	0.275	0.164	1	other
Kidins220	0.0064369	0.0707059	0.858	0.738	1	other
Cacul1	0.0039674	0.0705556	0.614	0.459	1	other
Dmtn	0.00525275	0.0705489	0.714	0.557	1	other
Dpy19l1	0.000274929	0.0705012	0.263	0.158	1	other
Crh	0.0801219	0.0702727	0.032	0.016	1	other
Shisa6	0.000996057	0.0702349	0.121	0.061	1	other
Wdr41	0.000485441	0.0701563	0.237	0.141	1	other
Ccdc85a	0.00107075	0.07007	0.498	0.35	1	other
Ndufab1	0.0151449	0.0700292	0.727	0.6	1	other
Slc25a3	0.00171324	0.0699787	0.888	0.799	1	other
Sqstm1	0.0352333	0.0699414	0.771	0.678	1	other
D5Ertd579e	0.000959419	0.0699129	0.542	0.387	1	other
Sgcb	0.000704104	0.0698932	0.347	0.23	1	other
Agtpbp1	0.0127707	0.0697987	0.54	0.422	1	other
Frrs1l	0.00311212	0.0697971	0.85	0.707	1	other
Psme3	0.00290318	0.0697845	0.491	0.367	1	other
Mthfd1l	2.29542e-06	0.0697477	0.114	0.035	0.0385286	other
Ugp2	5.35558e-05	0.0695462	0.229	0.123	0.887098	other
Fam168b	0.0047706	0.0695265	0.722	0.555	1	other
Fam171a2	0.00402426	0.0694512	0.468	0.344	1	other
Pgbd5	8.26333e-05	0.06932	0.275	0.158	1	other
Mrps23	0.00230558	0.0693079	0.373	0.256	1	other
Gfod1	0.000317523	0.0692737	0.259	0.156	1	other
Golga7b	0.000962559	0.0692674	0.595	0.441	1	other
Tubb4a	0.0153912	0.0692486	0.89	0.775	1	other
Sacm1l	0.00389681	0.0691059	0.441	0.32	1	other
Anks1b	0.0590194	0.0690668	0.803	0.689	1	other
Stim2	0.000132327	0.0690653	0.379	0.236	1	other
Cab39	0.00875857	0.069034	0.805	0.652	1	other
Rrn3	0.00641398	0.0689812	0.502	0.369	1	other
March9	0.00142056	0.0686969	0.244	0.156	1	other
March6	0.0107708	0.0686966	0.856	0.719	1	other
Nop58	0.00220253	0.068671	0.451	0.324	1	other
Ercc5	0.000201938	0.0685968	0.172	0.09	1	other
Kif1b	0.00475449	0.0685903	0.97	0.91	1	other
BC035947	6.40213e-05	0.0685893	0.127	0.053	1	other
Actr2	0.0148573	0.0684844	0.902	0.777	1	other
Abcb7	0.00365084	0.0684156	0.25	0.166	1	other
Kit	0.00106666	0.0684014	0.089	0.039	1	other
Arhgdig	0.00536183	0.0683688	0.735	0.592	1	other
Txndc17	0.0107045	0.0683217	0.65	0.5	1	other
Rpl13	0.00155757	0.0682366	1	0.996	1	other
Hnrnpa3	0.0123809	0.0682182	0.93	0.836	1	other
Mcfd2	0.0110754	0.0682066	0.576	0.434	1	other
Ppme1	0.00919221	0.0682035	0.744	0.578	1	other
Slitrk3	0.00142545	0.0681561	0.263	0.168	1	other
Tmem150c	0.000584939	0.0681248	0.369	0.246	1	other
Rpl29	0.0168153	0.0681235	0.996	0.973	1	other
Clmn	0.00268007	0.0680016	0.407	0.293	1	other
Snx17	0.00096172	0.0679623	0.348	0.234	1	other
Mtx2	0.00131686	0.0679621	0.254	0.162	1	other
Emc1	0.0100652	0.0679276	0.528	0.402	1	other
Sdhc	0.00175817	0.0677811	0.549	0.402	1	other
Gprasp1	0.00527941	0.0677797	0.977	0.936	1	other
Snca	0.028367	0.0677631	0.53	0.445	1	other
B4galnt1	0.0027067	0.0677396	0.284	0.191	1	other
Prelid3b	0.000905315	0.0676319	0.371	0.25	1	other
Chac2	0.000182678	0.0676314	0.17	0.086	1	other
Cacng3	0.000438363	0.0676196	0.197	0.111	1	other
Abca1	0.00516872	0.0675655	0.078	0.037	1	other
Hap1	0.00407671	0.0675445	1	0.988	1	other
Maea	0.0137276	0.0674967	0.542	0.426	1	other
B4gat1	0.00378647	0.0674433	0.46	0.34	1	other
Rplp1	0.000492431	0.0671932	1	1	1	other
Rab33a	5.1426e-06	0.0671184	0.1	0.029	0.0861386	other
Laptm4b	0.00106617	0.067004	0.21	0.127	1	other
Diras1	0.00112909	0.0669963	0.424	0.297	1	other
Rpl22	0.00454999	0.0668984	0.911	0.822	1	other
Gmfb	0.00416042	0.0668888	0.667	0.51	1	other
Ube2ql1	0.0321556	0.0668524	0.494	0.396	1	other
Rundc3a	0.034849	0.0668143	0.731	0.605	1	other
Tmem151b	0.0013657	0.0668106	0.384	0.26	1	other
Atp5a1	0.00326449	0.0667531	0.915	0.824	1	other
Osbpl2	0.000253356	0.0667464	0.434	0.287	1	other
Fundc2	0.000512183	0.0666908	0.491	0.342	1	other
E130307A14Rik	0.000431779	0.0666751	0.366	0.236	1	other
Atrnl1	0.00133484	0.0666303	0.159	0.09	1	other
Kif5b	0.00395046	0.0666015	0.896	0.75	1	other
Nectin3	0.000229193	0.0665954	0.248	0.146	1	other
Rerg	2.93222e-05	0.0665226	0.159	0.072	0.487336	other
Unc80	0.00411336	0.0664636	0.905	0.783	1	other
Canx	0.0079783	0.0663232	0.981	0.928	1	other
Elp3	0.00590202	0.0663107	0.464	0.352	1	other
Rundc1	1.28157e-05	0.0662426	0.242	0.125	0.213894	other
Fads1	0.00305042	0.0662411	0.343	0.238	1	other
Ifitm10	0.000221647	0.0662268	0.227	0.129	1	other
Stat2	5.12673e-05	0.0662025	0.15	0.066	0.849345	other
Sub1	0.0134155	0.0661987	0.96	0.875	1	other
Ndufa12	0.00655003	0.0661591	0.814	0.684	1	other
Ap2b1	0.0566666	0.066151	0.809	0.691	1	other
Tomm20	0.00219717	0.0660962	0.958	0.896	1	other
Zc3h7a	0.000427582	0.0660908	0.29	0.182	1	other
Kcna6	0.00880273	0.0660205	0.521	0.402	1	other
Pin1	0.000857982	0.065987	0.61	0.438	1	other
Gstm5	0.0251108	0.0659111	0.383	0.299	1	other
Arhgap35	0.0197782	0.0658998	0.589	0.461	1	other
Ppp1r13b	0.00146849	0.0658939	0.447	0.305	1	other
Naaa	0.00050323	0.0658877	0.278	0.172	1	other
Mob4	0.0428597	0.0658765	0.739	0.619	1	other
Gabra3	0.0389052	0.0658621	0.703	0.551	1	other
Sec23a	0.00203129	0.0658032	0.587	0.43	1	other
Fam20c	0.00150028	0.0657563	0.369	0.252	1	other
Adcy5	0.00242866	0.065674	0.559	0.412	1	other
Gm10073	0.000307487	0.0656671	0.345	0.223	1	other
Ahcyl1	0.00295328	0.0656528	0.574	0.426	1	other
Gramd1b	0.00235422	0.0656196	0.333	0.229	1	other
Gapdh	0.0166317	0.0655563	0.811	0.674	1	other
Psmd2	0.0115606	0.0655457	0.468	0.35	1	other
Map9	0.00615911	0.0653889	0.659	0.525	1	other
Rnf10	0.0265904	0.0653224	0.706	0.58	1	other
Pigs	0.00174884	0.0653015	0.362	0.242	1	other
Vps52	0.000468881	0.0652467	0.225	0.131	1	other
Rcan2	0.0155823	0.065233	0.854	0.74	1	other
Doc2a	8.71635e-05	0.0652114	0.309	0.18	1	other
Plcb1	0.00469887	0.0651333	0.485	0.381	1	other
1700001L19Rik	0.000182153	0.0651111	0.337	0.209	1	other
Vapb	0.0103525	0.0650952	0.705	0.568	1	other
Stard7	0.00102833	0.0650843	0.631	0.471	1	other
Sin3b	0.0102444	0.0650542	0.528	0.396	1	other
Chchd10	0.0166001	0.0649402	0.833	0.723	1	other
Bhlhe40	0.00035846	0.0649094	0.206	0.115	1	other
Srp72	0.0187061	0.0649093	0.699	0.561	1	other
Hspd1	0.00136712	0.0648946	0.691	0.52	1	other
Glra1	0.000505554	0.0648771	0.14	0.07	1	other
Mamld1	0.00239473	0.0648495	0.22	0.139	1	other
Ppm1f	0.00225949	0.0648285	0.4	0.281	1	other
Orai2	0.00153538	0.0648116	0.326	0.219	1	other
Abhd12	0.0344532	0.0647865	0.699	0.564	1	other
Bmpr2	0.00846146	0.0647739	0.68	0.545	1	other
Asb1	0.00482669	0.0647663	0.318	0.223	1	other
Dlgap2	5.36173e-05	0.0646503	0.165	0.078	0.888064	other
Ift88	0.000474545	0.0646418	0.186	0.102	1	other
Vdac2	0.0229015	0.064638	0.67	0.535	1	other
Daam1	0.00466644	0.0644809	0.532	0.393	1	other
Ap1s1	0.0023713	0.0644472	0.744	0.562	1	other
Olfm2	0.00539979	0.0644237	0.466	0.344	1	other
Magee2	0.000615232	0.064413	0.165	0.09	1	other
Nudt19	0.0078209	0.0643731	0.574	0.438	1	other
Zc3h7b	0.02168	0.0643162	0.547	0.436	1	other
Aplp1	0.016853	0.0641061	0.92	0.865	1	other
Slc8a2	0.00385371	0.064029	0.386	0.275	1	other
Phtf1	0.00590867	0.0639697	0.299	0.211	1	other
Acsl4	0.00324643	0.0639476	0.447	0.32	1	other
Mex3b	0.000377981	0.0637958	0.119	0.055	1	other
Lmbrd2	0.00198372	0.0636788	0.578	0.424	1	other
Dctn1	0.0158197	0.0636482	0.765	0.623	1	other
Serinc5	0.0010718	0.0636403	0.182	0.104	1	other
Mypop	0.000279875	0.0636257	0.348	0.217	1	other
Zdhhc8	0.00117283	0.0636229	0.411	0.283	1	other
Snph	0.000920037	0.0635806	0.479	0.33	1	other
2810001G20Rik	0.00207976	0.0634408	0.322	0.219	1	other
Cul3	0.00682809	0.0634276	0.532	0.404	1	other
Cep19	0.00188828	0.0634214	0.542	0.385	1	other
Coro1c	0.0114212	0.0634081	0.634	0.502	1	other
Rnf114	0.011668	0.0633569	0.335	0.242	1	other
Cops6	0.00611008	0.0633234	0.479	0.354	1	other
Cdv3	0.0178836	0.0633074	0.661	0.518	1	other
Ifngr2	0.00186146	0.0632944	0.337	0.225	1	other
Mvk	2.81889e-05	0.0632932	0.129	0.051	0.46864	other
Ppp2r2b	0.0052352	0.0631838	0.652	0.492	1	other
Rps10	0.00569238	0.0631829	0.998	0.979	1	other
Nop56	0.00823357	0.0631185	0.697	0.545	1	other
Amigo2	0.00312287	0.0630368	0.275	0.184	1	other
Samd10	0.000105001	0.0628993	0.218	0.117	1	other
Mmp14	0.00309928	0.0628361	0.027	0.004	1	other
Vps41	0.0117839	0.0627863	0.549	0.424	1	other
Ccny	0.00208508	0.0626514	0.322	0.217	1	other
Clptm1l	0.000623349	0.0626233	0.481	0.332	1	other
Eif2b3	4.05034e-05	0.0626158	0.136	0.057	0.671951	other
Rap1gap2	0.00643553	0.0626158	0.458	0.334	1	other
Borcs5	0.00376285	0.0624943	0.239	0.156	1	other
4930453N24Rik	0.00422557	0.0624528	0.174	0.107	1	other
Armc1	0.00440815	0.0624139	0.581	0.438	1	other
Rab40b	0.00079626	0.0623571	0.188	0.105	1	other
Mtor	0.00161866	0.0622928	0.356	0.242	1	other
Tmem86a	2.40927e-05	0.0622155	0.11	0.039	0.400975	other
Fem1a	0.000101667	0.0621815	0.288	0.166	1	other
Tmem14c	0.00648147	0.0621474	0.218	0.146	1	other
Sesn2	0.000162808	0.0621134	0.142	0.066	1	other
Pigq	0.00216636	0.0621117	0.301	0.201	1	other
Rps27l	0.00263683	0.0620955	0.417	0.295	1	other
Glrx3	0.00286229	0.0620572	0.402	0.283	1	other
Pkp2	0.000182522	0.0620404	0.093	0.035	1	other
Sigmar1	0.0025864	0.06198	0.271	0.18	1	other
Ctif	0.010658	0.061968	0.54	0.414	1	other
Dusp3	0.0088331	0.0619499	0.58	0.451	1	other
Rgs19	0.000635401	0.0619405	0.295	0.186	1	other
Cct2	0.00717471	0.0619022	0.752	0.586	1	other
Syt3	0.000252111	0.0618853	0.284	0.172	1	other
Atg9a	0.00116393	0.061852	0.434	0.307	1	other
Mafk	0.00169335	0.0618481	0.161	0.092	1	other
Slc35c2	0.00130094	0.0617765	0.261	0.164	1	other
Nelfcd	0.000579873	0.0617583	0.193	0.109	1	other
Calm1	0.000807219	0.0617527	0.996	0.994	1	other
Pak1ip1	0.00730993	0.0616921	0.333	0.242	1	other
2410131K14Rik	0.000320404	0.0616248	0.178	0.096	1	other
Sh3gl2	0.00187593	0.0616034	0.672	0.504	1	other
Plcxd3	0.0169965	0.0615785	0.447	0.35	1	other
Rpn1	0.011721	0.0615509	0.494	0.375	1	other
Kctd10	0.00193227	0.0614945	0.324	0.219	1	other
Igf2r	0.0115309	0.0614515	0.263	0.186	1	other
Nr2f1	0.0334854	0.0614244	0.191	0.139	1	other
Gng4	0.0520609	0.0614138	0.534	0.439	1	other
Uvrag	0.000433762	0.0613828	0.205	0.117	1	other
March2	0.000508373	0.0612943	0.61	0.445	1	other
Dnajc6	0.048734	0.0612306	0.822	0.727	1	other
Gria3	0.00360167	0.0611931	0.576	0.436	1	other
Fam189a2	0.00035	0.0611375	0.214	0.123	1	other
Slc16a7	0.000596447	0.0609802	0.136	0.068	1	other
Atmin	0.00859676	0.0608554	0.494	0.383	1	other
Llph	0.00411721	0.0608128	0.413	0.295	1	other
Larp4b	0.0104333	0.0607685	0.807	0.648	1	other
Med14	0.00893609	0.0606234	0.328	0.234	1	other
Ttll5	0.000805367	0.0606157	0.225	0.135	1	other
Usp33	0.0694207	0.0606084	0.561	0.461	1	other
Galnt13	0.00489285	0.0605746	0.489	0.361	1	other
Cep170b	0.0534659	0.0605644	0.722	0.605	1	other
Il1rap	0.00243218	0.0605331	0.39	0.275	1	other
Hexim2	0.000214639	0.0605314	0.244	0.139	1	other
Slc7a3	0.00684959	0.060525	0.222	0.15	1	other
Lsm12	0.000152367	0.0605127	0.316	0.189	1	other
Mboat2	0.000364289	0.0604926	0.284	0.172	1	other
Nsmf	0.00331062	0.0604922	0.364	0.252	1	other
2610021A01Rik	0.000134867	0.0604914	0.133	0.059	1	other
Trim2	0.0241442	0.0604786	0.909	0.842	1	other
Txnrd1	0.00762554	0.0604677	0.453	0.338	1	other
Arel1	0.00160535	0.0604448	0.299	0.197	1	other
Tor1a	9.07853e-05	0.0604371	0.295	0.17	1	other
Slc35e3	0.00269618	0.0604251	0.407	0.279	1	other
Ephb1	0.0275089	0.0604097	0.371	0.285	1	other
Fam174b	0.000776874	0.0603813	0.267	0.166	1	other
Mkl1	0.000677492	0.0602867	0.208	0.121	1	other
Agl	0.0141469	0.0602188	0.352	0.256	1	other
Tspyl3	0.0292073	0.0601262	0.449	0.355	1	other
Ehd3	0.0224081	0.0601223	0.492	0.393	1	other
Slc36a1	0.000840747	0.0601209	0.203	0.117	1	other
Akirin1	0.0141287	0.0600886	0.498	0.377	1	other
Tesk1	0.00279921	0.0600601	0.373	0.254	1	other
Cyb561	0.00761106	0.0600478	0.511	0.379	1	other
Ext1	0.00350192	0.0599981	0.155	0.092	1	other
Lpcat4	0.000440517	0.0599962	0.218	0.125	1	other
Rnd1	0.000587553	0.0598855	0.271	0.166	1	other
Rock2	0.0574453	0.059869	0.746	0.609	1	other
Snx19	0.00026781	0.0598174	0.312	0.191	1	other
Dcaf12l1	0.0141966	0.0597964	0.693	0.57	1	other
Rps20	0.00494447	0.0597901	0.996	0.982	1	other
Fgd1	0.000397857	0.0597741	0.153	0.078	1	other
Hsbp1	0.00894566	0.0596961	0.894	0.791	1	other
Mcat	0.000199622	0.0596486	0.131	0.061	1	other
Hs6st2	0.0191523	0.0594813	0.43	0.332	1	other
Rac3	0.00272609	0.0594775	0.6	0.447	1	other
Sybu	0.0324755	0.0593964	0.638	0.512	1	other
Rpl23a	0.0119827	0.059377	1	0.998	1	other
Calm2	0.00551654	0.0593435	1	0.994	1	other
Prkrip1	0.000204024	0.059302	0.258	0.148	1	other
Pnkd	0.0223422	0.0592981	0.578	0.471	1	other
Sumo3	0.0225026	0.0592473	0.78	0.646	1	other
Aven	0.000183538	0.059246	0.106	0.043	1	other
Vti1b	0.0161338	0.0592271	0.824	0.723	1	other
Ndufv3	0.021754	0.059219	0.765	0.611	1	other
Nipa1	0.000134936	0.0592165	0.225	0.123	1	other
Grin2a	0.00075349	0.059179	0.277	0.174	1	other
Arpp19	0.021017	0.0591604	0.788	0.664	1	other
Dync1i1	0.0405172	0.0590232	0.576	0.457	1	other
AW551984	0.0295034	0.0590162	0.903	0.832	1	other
Tarsl2	0.000108978	0.0589636	0.233	0.127	1	other
Csf1	0.000205337	0.0589395	0.138	0.064	1	other
Garnl3	0.00189102	0.0586128	0.392	0.271	1	other
Ldha	0.0767725	0.0585634	0.53	0.436	1	other
Rbfox3	0.0301452	0.058554	0.826	0.717	1	other
Gns	0.00122175	0.0585471	0.515	0.369	1	other
Zfp120	0.000517757	0.0585098	0.265	0.16	1	other
Rai1	0.00254232	0.0584763	0.458	0.322	1	other
Acsl6	0.00135951	0.05846	0.377	0.252	1	other
Scap	0.00305708	0.0584058	0.267	0.176	1	other
Prpf19	0.0111694	0.0583969	0.625	0.482	1	other
Tmem158	0.0588108	0.0583238	0.805	0.693	1	other
Ablim3	0.000180051	0.0582821	0.331	0.205	1	other
BC005537	0.0209723	0.0582071	0.71	0.59	1	other
Hexim1	0.0218071	0.0581996	0.256	0.189	1	other
Arsb	0.00118606	0.0581726	0.422	0.289	1	other
Atp5e	0.0423967	0.0581687	0.903	0.791	1	other
Pi4k2a	0.0235316	0.0581438	0.428	0.322	1	other
Clstn1	0.0208578	0.0581422	0.955	0.896	1	other
Tmem242	0.000984801	0.0581163	0.562	0.389	1	other
Rps2	0.0343032	0.0580936	1	0.998	1	other
Camkk1	0.0136545	0.0580931	0.371	0.283	1	other
Ndufa1	0.0101426	0.0579887	0.627	0.475	1	other
Sncb	0.0573706	0.0579762	0.803	0.713	1	other
Pard3	0.0179064	0.057965	0.358	0.27	1	other
Krt90	7.69452e-05	0.0579214	0.078	0.023	1	other
Fam193b	0.00441005	0.0578316	0.528	0.385	1	other
Eapp	0.000701951	0.0577278	0.343	0.219	1	other
Hid1	0.00670116	0.057712	0.4	0.293	1	other
Slc6a15	0.0176855	0.0576819	0.47	0.359	1	other
Plaa	0.00199969	0.0576803	0.241	0.15	1	other
Pde1a	0.0119296	0.0576609	0.21	0.146	1	other
Ppp2r2d	0.00508272	0.0576385	0.538	0.393	1	other
Arl4c	0.0317102	0.0576132	0.669	0.543	1	other
Caprin1	0.0121934	0.0576123	0.873	0.748	1	other
Ipo7	0.0138932	0.0576022	0.477	0.365	1	other
Ppm1m	0.0022444	0.0573126	0.265	0.176	1	other
Wbp4	0.0290695	0.0572869	0.758	0.635	1	other
Rab11b	0.00938743	0.0572802	0.756	0.617	1	other
Rpl23	0.00803506	0.0572605	1	1	1	other
Patz1	0.00250546	0.0572453	0.265	0.172	1	other
Gatad2b	0.0597423	0.0572411	0.739	0.652	1	other
Nedd4	0.0266388	0.056992	0.97	0.932	1	other
Cand1	0.00943803	0.0569598	0.653	0.521	1	other
Wdr47	0.0499311	0.0569267	0.72	0.594	1	other
Ralgps2	0.00671475	0.056845	0.513	0.377	1	other
St3gal3	0.000176043	0.0567089	0.225	0.127	1	other
Habp4	0.0449781	0.0567084	0.759	0.66	1	other
Nomo1	0.0132285	0.0566869	0.453	0.336	1	other
Spred3	0.00168581	0.0566796	0.265	0.17	1	other
Ctsd	0.00487806	0.0566535	0.699	0.535	1	other
Ptpa	0.0152395	0.0566527	0.684	0.557	1	other
Pomgnt1	0.00245792	0.0566237	0.373	0.254	1	other
Pik3r3	0.019553	0.056617	0.33	0.242	1	other
Trhr	0.0492613	0.0565953	0.254	0.193	1	other
Lrrc47	0.00239394	0.0565728	0.402	0.275	1	other
Acaca	0.00769339	0.0565662	0.496	0.363	1	other
Gpc1	0.00206394	0.0565365	0.309	0.205	1	other
Zfp365	0.0138459	0.0565276	0.527	0.416	1	other
Ap3m2	0.0175888	0.0565191	0.523	0.4	1	other
Ncoa7	0.0624743	0.0564893	0.886	0.775	1	other
Shisa2	0.00296742	0.056484	0.176	0.105	1	other
Slc25a39	0.00630243	0.0564596	0.358	0.26	1	other
Foxk2	0.00690455	0.0563831	0.352	0.25	1	other
Susd4	0.00508109	0.0562615	0.725	0.549	1	other
Slk	0.000580553	0.0562083	0.241	0.143	1	other
Usp9x	0.0287061	0.0561999	0.915	0.818	1	other
Aldh5a1	0.00697704	0.0561638	0.473	0.346	1	other
Pik3r4	0.000226743	0.0561353	0.188	0.098	1	other
Apba2	0.0146298	0.0561142	0.504	0.387	1	other
Nipsnap2	0.00294258	0.0560686	0.419	0.293	1	other
Zhx1	0.00962629	0.0560523	0.392	0.293	1	other
B3gat2	0.00223287	0.0560003	0.311	0.207	1	other
Slc35b4	0.00291769	0.0559899	0.29	0.193	1	other
Npm3	0.00149996	0.0559863	0.197	0.117	1	other
Ahcyl2	0.0326897	0.0559845	0.515	0.404	1	other
Zmym3	0.0338181	0.055965	0.672	0.537	1	other
Ciapin1	0.000814086	0.0559499	0.286	0.186	1	other
Cadm4	0.00378659	0.0558922	0.625	0.467	1	other
Sap130	0.00035328	0.0558876	0.172	0.092	1	other
Prrt1	0.00501691	0.0558568	0.578	0.441	1	other
Fam184b	0.000111401	0.0557696	0.097	0.035	1	other
Fam192a	0.00763374	0.0557376	0.284	0.201	1	other
Nckap1	0.0443488	0.0557361	0.828	0.701	1	other
Phf10	0.00593928	0.0557356	0.417	0.297	1	other
Mgat5	0.0148014	0.0557155	0.515	0.381	1	other
Vamp2	0.00559026	0.0556062	0.989	0.965	1	other
Ipcef1	0.00200439	0.0555954	0.227	0.143	1	other
Mad2l1	0.000124981	0.05558	0.11	0.045	1	other
Tmem170b	0.00322882	0.0555325	0.384	0.264	1	other
Bcar1	0.00152435	0.0554773	0.278	0.18	1	other
Smim10l1	0.07718	0.0554713	0.934	0.855	1	other
Gpat4	0.000331008	0.055461	0.413	0.266	1	other
Tmod2	0.0550544	0.0554143	0.903	0.838	1	other
Sucla2	0.00778235	0.0553929	0.561	0.424	1	other
Svop	0.0172819	0.055389	0.714	0.576	1	other
Mtmr4	0.00111035	0.0553708	0.523	0.367	1	other
9530068E07Rik	0.0100297	0.0553543	0.566	0.428	1	other
Gna11	0.0271438	0.0553084	0.623	0.482	1	other
Map2k7	0.00601963	0.0552854	0.545	0.402	1	other
Xrcc3	0.000161563	0.0552609	0.148	0.07	1	other
Kcnj3	0.0156381	0.0552547	0.439	0.324	1	other
Klhl32	0.000955305	0.0552424	0.322	0.205	1	other
Rab5c	0.00390783	0.0551691	0.426	0.299	1	other
Rpl15	0.0101016	0.0551418	0.996	0.998	1	other
Cradd	8.11549e-05	0.0550577	0.081	0.025	1	other
Mageh1	0.00882273	0.0550465	0.383	0.275	1	other
Ezr	0.00274577	0.0550071	0.129	0.07	1	other
Gabrb1	0.105377	0.0549689	0.926	0.857	1	other
Papd7	0.00605955	0.0549556	0.32	0.225	1	other
Ocrl	0.041917	0.0549511	0.697	0.555	1	other
Dhx40	0.00229423	0.0548815	0.231	0.143	1	other
Cdkl3	0.00183659	0.054835	0.184	0.109	1	other
Nkiras1	0.00144124	0.0547409	0.381	0.256	1	other
Gm26760	0.000164218	0.0547395	0.064	0.018	1	other
Kcnip3	0.000353354	0.0547277	0.104	0.045	1	other
Ngef	0.00532593	0.0547097	0.212	0.137	1	other
Foxj3	0.0163913	0.0546852	0.612	0.482	1	other
Rita1	0.000337256	0.0546409	0.163	0.084	1	other
Pigk	0.00804788	0.0546296	0.515	0.387	1	other
Dock4	0.00390169	0.0545774	0.35	0.25	1	other
Ublcp1	0.00432511	0.0545647	0.341	0.234	1	other
Sh3rf1	0.00463641	0.0545582	0.254	0.168	1	other
Cs	0.040411	0.0545575	0.538	0.434	1	other
Hnrnpa1	0.00708648	0.0545417	0.97	0.902	1	other
Zfp106	0.0417203	0.054522	0.733	0.602	1	other
Ank	0.00521041	0.0545126	0.383	0.271	1	other
B4galt5	0.0220579	0.0544952	0.392	0.301	1	other
Cacnb1	0.00516221	0.0544183	0.343	0.24	1	other
Vps13d	0.00217229	0.054306	0.35	0.234	1	other
Neto2	0.0262419	0.0542348	0.322	0.244	1	other
Arid1b	0.00572717	0.054224	0.456	0.322	1	other
Pex6	0.0043197	0.0542214	0.205	0.129	1	other
Srprb	0.02366	0.054178	0.377	0.287	1	other
St6galnac3	0.000172316	0.0541778	0.097	0.037	1	other
Grm4	0.00039415	0.0541352	0.076	0.027	1	other
A330069E16Rik	0.0874351	0.0541336	0.248	0.193	1	other
Klhl2	0.0186707	0.0541235	0.47	0.354	1	other
Calb2	0.0376505	0.054108	0.544	0.439	1	other
Kpna6	0.0161675	0.0540612	0.443	0.332	1	other
Wipi2	0.0344592	0.0540455	0.674	0.541	1	other
Atcay	0.0191233	0.0540362	0.714	0.564	1	other
Dda1	0.0202515	0.0539785	0.655	0.521	1	other
Usp32	0.0315052	0.0539378	0.564	0.453	1	other
Ranbp1	0.0712633	0.0539357	0.621	0.504	1	other
Ppp1r7	0.0133896	0.05388	0.326	0.238	1	other
Specc1	0.0021497	0.0538681	0.371	0.256	1	other
Pip4k2a	0.0336715	0.0538553	0.312	0.236	1	other
Aldh18a1	0.0004177	0.0538524	0.131	0.062	1	other
Zfp946	0.00171828	0.053814	0.161	0.092	1	other
Cacna1g	0.00239084	0.0537927	0.324	0.219	1	other
Tmem151a	0.0208265	0.0537716	0.525	0.408	1	other
Uspl1	0.00248406	0.0537714	0.241	0.154	1	other
Sept3	0.0275436	0.0537167	0.938	0.873	1	other
4833439L19Rik	0.0215933	0.0536857	0.616	0.477	1	other
Clmp	0.0313344	0.0536089	0.464	0.359	1	other
Dgkd	0.00455031	0.0535518	0.347	0.238	1	other
Ndufa8	0.0537318	0.0535422	0.67	0.57	1	other
Rab15	0.00465375	0.0535197	0.547	0.41	1	other
Ap3b2	0.0114267	0.0534559	0.458	0.338	1	other
Cox7a2	0.0486808	0.0533611	0.905	0.809	1	other
Zfp12	0.00194104	0.0533363	0.199	0.119	1	other
Letm1	0.00656505	0.0533024	0.271	0.186	1	other
Amz1	0.00115892	0.0533002	0.21	0.123	1	other
Sorl1	0.00539699	0.0532918	0.479	0.348	1	other
Cdk5r2	0.0384938	0.0532871	0.578	0.469	1	other
Itm2b	0.0392666	0.0532751	0.871	0.771	1	other
Calr	0.00164966	0.0532719	0.902	0.76	1	other
Setd6	0.00171812	0.0532315	0.188	0.111	1	other
Uso1	0.00478031	0.0532095	0.479	0.34	1	other
Ccdc136	0.0214856	0.0531398	0.468	0.359	1	other
Lrfn2	0.000131346	0.053133	0.138	0.062	1	other
Btbd2	0.00261222	0.0531116	0.36	0.242	1	other
Fahd1	0.00629107	0.0531057	0.148	0.09	1	other
Asb8	0.000735794	0.052994	0.339	0.215	1	other
Pip5k1c	0.00501852	0.0529491	0.57	0.426	1	other
Ppm1a	0.0297175	0.0529221	0.911	0.852	1	other
Get4	0.00642993	0.0528855	0.326	0.225	1	other
Hipk1	0.0106186	0.0528712	0.631	0.48	1	other
Klhl12	0.00472851	0.0528528	0.307	0.213	1	other
Cbln2	0.0135951	0.0528221	0.148	0.096	1	other
C1qbp	0.00172982	0.0528158	0.453	0.314	1	other
Fam98a	0.00174814	0.0527146	0.199	0.121	1	other
C1ql3	0.356226	0.0527132	0.178	0.156	1	other
Cpne6	0.0391677	0.0526974	0.343	0.275	1	other
Tigar	0.00151931	0.0525643	0.267	0.174	1	other
Man2a2	0.0967086	0.05252	0.527	0.426	1	other
Gprin3	0.00134135	0.052514	0.259	0.166	1	other
Mapt	0.0339267	0.0524611	0.985	0.969	1	other
Kif17	0.0047434	0.052426	0.203	0.131	1	other
Rragc	0.0159944	0.0523862	0.477	0.363	1	other
Kcnk9	0.25229	0.0523774	0.352	0.307	1	other
Vps11	0.0016097	0.0523613	0.25	0.154	1	other
Gpr22	0.00987321	0.0523438	0.229	0.156	1	other
Plekha3	0.00195208	0.0522943	0.343	0.223	1	other
Coa5	0.0186852	0.0521723	0.464	0.355	1	other
Large1	0.00459619	0.0521636	0.477	0.344	1	other
Akr1a1	0.0212441	0.0521026	0.903	0.775	1	other
Pclo	0.00658282	0.0520704	0.886	0.785	1	other
Tfg	0.0145518	0.0520617	0.312	0.225	1	other
Paqr9	0.0228635	0.0520368	0.483	0.373	1	other
Strip2	0.00042718	0.0520248	0.11	0.049	1	other
Pnma2	0.0513599	0.0519919	0.672	0.541	1	other
Sema6d	0.0460659	0.0519578	0.318	0.242	1	other
Crk	0.014791	0.0519489	0.688	0.531	1	other
Ece2	0.00599909	0.0519446	0.417	0.291	1	other
Vldlr	0.0426988	0.0519326	0.415	0.318	1	other
Psma4	0.0289623	0.0518384	0.354	0.271	1	other
Trappc8	0.00956709	0.0518098	0.256	0.176	1	other
Endog	0.00263436	0.0518054	0.188	0.113	1	other
Whamm	0.000860181	0.0518004	0.184	0.104	1	other
Dnaja3	0.00508181	0.0517734	0.398	0.281	1	other
Fam169a	0.0119778	0.051773	0.528	0.4	1	other
Hbs1l	0.0229372	0.0517312	0.197	0.139	1	other
Farsb	0.00423576	0.051571	0.348	0.24	1	other
Dhx9	0.00894974	0.0515695	0.458	0.338	1	other
Pnmal2	0.0562268	0.0515318	0.996	0.971	1	other
Ptpn9	0.00771242	0.0514769	0.273	0.188	1	other
D230025D16Rik	0.00443499	0.0514431	0.294	0.195	1	other
Cdc42se2	0.0145385	0.0512256	0.612	0.465	1	other
Synpo2	0.000268979	0.0512193	0.08	0.027	1	other
Taldo1	0.00154667	0.0512191	0.176	0.102	1	other
Smim1	0.0205297	0.0511919	0.244	0.176	1	other
Rpa1	0.000521017	0.051162	0.22	0.127	1	other
Abi1	0.00934168	0.0511532	0.464	0.334	1	other
Rgs7	0.0123323	0.0509656	0.402	0.289	1	other
Dlg4	0.0671295	0.0509382	0.922	0.793	1	other
Kbtbd7	0.0467627	0.0508435	0.392	0.311	1	other
Ap2m1	0.0190464	0.0508173	0.875	0.754	1	other
Bdh1	0.020127	0.0507597	0.229	0.164	1	other
Hnrnpu	0.0325503	0.050708	0.909	0.797	1	other
Fktn	0.0314918	0.0506417	0.445	0.348	1	other
Bhlhb9	0.0145463	0.0506372	0.367	0.27	1	other
Fam149a	0.00819	0.0505852	0.239	0.16	1	other
Usp22	0.0232654	0.050571	0.953	0.887	1	other
Tmem127	0.00815719	0.0505091	0.371	0.264	1	other
Nfia	0.0203153	0.0504638	0.097	0.057	1	other
Dclk1	0.116372	0.0504581	0.941	0.855	1	other
Gsr	0.00136461	0.0503451	0.256	0.158	1	other
St8sia6	0.00212169	0.0503192	0.072	0.029	1	other
Rheb	0.0377009	0.0503116	0.759	0.598	1	other
Shoc2	0.0357775	0.0503015	0.555	0.438	1	other
Fam19a4	0.000180029	0.0503004	0.042	0.006	1	other
Magee1	0.0509379	0.0502625	0.703	0.564	1	other
Mapk8ip3	0.0814819	0.0502591	0.818	0.705	1	other
Pgm2l1	0.14044	0.0502381	0.831	0.762	1	other
Abr	0.0325142	0.0502213	0.902	0.795	1	other
Ccdc124	0.0274672	0.0502154	0.544	0.424	1	other
Twf1	0.00464119	0.0502129	0.322	0.221	1	other
Ddah1	0.00377364	0.0501928	0.354	0.244	1	other
Poglut1	0.0194153	0.0501788	0.47	0.361	1	other
Ksr1	0.00237757	0.0501393	0.121	0.064	1	other
Nfat5	0.0155246	0.0501307	0.46	0.342	1	other
Ascc1	0.00321887	0.0501122	0.191	0.117	1	other
Nbeal2	0.000741314	0.0500842	0.117	0.057	1	other
Eid1	0.0179388	0.0500718	0.962	0.895	1	other
Sept6	0.00403129	0.0500696	0.314	0.217	1	other
Gprin2	0.00452701	0.0500037	0.155	0.092	1	other
Wwc1	0.0013547	0.0499851	0.222	0.135	1	other
Psmb1	0.0121158	0.0499698	0.86	0.734	1	other
Lmbrd1	0.0180122	0.0499315	0.722	0.566	1	other
Golga3	0.0145118	0.049916	0.32	0.229	1	other
Kctd17	0.00755541	0.0498967	0.432	0.314	1	other
Trim8	0.00677259	0.0498901	0.337	0.234	1	other
Tpd52l1	0.0280666	0.0498744	0.322	0.24	1	other
Tgoln1	0.0160373	0.0498696	0.926	0.846	1	other
Scamp5	0.0502723	0.0497986	0.805	0.672	1	other
4930447C04Rik	0.0187562	0.0497247	0.216	0.154	1	other
Nceh1	0.0398608	0.0496379	0.475	0.379	1	other
Pank3	0.0017888	0.0496102	0.411	0.281	1	other
Stam	0.0135014	0.0496061	0.443	0.338	1	other
Dnajc21	0.0201638	0.0495533	0.509	0.395	1	other
Mien1	0.0362294	0.0495412	0.606	0.467	1	other
Mmgt1	0.00113579	0.0495355	0.184	0.105	1	other
Cds1	0.000757072	0.0495316	0.172	0.094	1	other
Cflar	0.00387607	0.049528	0.119	0.064	1	other
Rnf14	0.0724705	0.0495253	0.884	0.77	1	other
Arhgap32	0.00532066	0.0494537	0.513	0.375	1	other
Add1	0.0679505	0.0493938	0.811	0.689	1	other
Ncs1	0.034819	0.04939	0.833	0.701	1	other
H2afy2	0.00725081	0.0493735	0.191	0.123	1	other
Sptan1	0.092448	0.0493542	0.727	0.635	1	other
Itsn1	0.0166528	0.0493494	0.458	0.344	1	other
Psmb3	0.0123925	0.0492464	0.373	0.268	1	other
Kctd1	0.011941	0.0492258	0.11	0.064	1	other
Pip5k1b	0.001787	0.0491761	0.165	0.096	1	other
1110065P20Rik	0.0222793	0.0491725	0.731	0.598	1	other
Inpp5e	0.00552866	0.0491053	0.218	0.143	1	other
Cpsf7	0.00880186	0.0490372	0.413	0.303	1	other
Ndufb8	0.0473758	0.0490044	0.812	0.684	1	other
Slc27a4	0.0374191	0.048857	0.4	0.312	1	other
Zdhhc23	0.00540837	0.0487752	0.116	0.064	1	other
Mapk8ip2	0.10235	0.0486697	0.818	0.727	1	other
Ndufa10	0.01832	0.0486143	0.659	0.516	1	other
Wbp1l	0.000121302	0.0486081	0.167	0.082	1	other
Frmd6	0.00010399	0.048538	0.074	0.021	1	other
Mturn	0.00173351	0.0485301	0.371	0.246	1	other
Hbegf	0.00164255	0.0485212	0.119	0.061	1	other
Rilpl1	0.00843988	0.0485136	0.182	0.117	1	other
Cct8	0.022045	0.0485059	0.665	0.521	1	other
Spag9	0.0941469	0.0484481	0.841	0.783	1	other
Gabarapl1	0.0277178	0.0484134	0.996	0.984	1	other
Cbarp	0.00902905	0.0484012	0.994	0.971	1	other
Atp11c	0.00190491	0.048366	0.129	0.068	1	other
Xkr4	0.000555051	0.0482869	0.131	0.062	1	other
Mtcl1	0.00474006	0.0482862	0.241	0.156	1	other
Klhl23	0.00398739	0.0482743	0.294	0.199	1	other
Stmn3	0.0140615	0.0482188	0.955	0.902	1	other
Tsc2	0.00336505	0.0481823	0.214	0.137	1	other
Skiv2l	0.00350901	0.048182	0.161	0.096	1	other
Abcf2	0.00349874	0.0481733	0.227	0.145	1	other
Arih2	0.00403745	0.0481345	0.294	0.197	1	other
Tox4	0.0552697	0.048081	0.434	0.334	1	other
Hdlbp	0.0308763	0.0480716	0.417	0.332	1	other
Wwp1	0.0127952	0.0480666	0.237	0.164	1	other
Ociad1	0.095862	0.0480444	0.845	0.783	1	other
Dcaf8	0.0310751	0.0479912	0.578	0.463	1	other
Sowahc	0.00808111	0.0479819	0.15	0.092	1	other
Vps13b	0.00829505	0.0479789	0.301	0.209	1	other
Ptchd4	0.00349562	0.047911	0.282	0.186	1	other
2310057M21Rik	0.000210093	0.0478674	0.269	0.156	1	other
Bicd1	0.132206	0.0478483	0.777	0.658	1	other
Fam208b	0.00574828	0.047846	0.208	0.135	1	other
Tm7sf3	0.00152216	0.0477764	0.186	0.107	1	other
Rpl22l1	0.00435539	0.0477255	1	1	1	other
Slc35f4	0.00721115	0.0476998	0.225	0.15	1	other
Kdelr2	0.0177252	0.0476745	0.417	0.318	1	other
Acyp2	0.00145845	0.0476662	0.233	0.143	1	other
Smim18	0.00509682	0.0476184	0.157	0.096	1	other
Snapc1	0.0217153	0.0475499	0.477	0.359	1	other
Rundc3b	0.0221903	0.0475414	0.492	0.375	1	other
Tatdn2	0.00116628	0.0474525	0.169	0.094	1	other
Ube2d3	0.0621841	0.0474482	0.902	0.828	1	other
Zc3h14	0.0102395	0.0474095	0.456	0.33	1	other
Fam222a	0.0066466	0.0473938	0.174	0.109	1	other
Armc8	0.0592996	0.0473931	0.54	0.428	1	other
Brox	0.0170915	0.0473929	0.439	0.322	1	other
Rab12	0.0779426	0.0473852	0.583	0.482	1	other
Fam78b	0.00106951	0.0473534	0.261	0.16	1	other
Gorasp2	0.00603851	0.0473436	0.513	0.371	1	other
Nectin1	0.0283678	0.0472954	0.294	0.221	1	other
Gnpda1	0.0129155	0.0472521	0.275	0.195	1	other
Srp54a	0.0311011	0.0472334	0.348	0.262	1	other
Gpr180	0.00358734	0.0472308	0.225	0.141	1	other
Fuca2	0.0146042	0.0472238	0.33	0.24	1	other
Rps12-ps3	0.00266129	0.0472168	0.129	0.07	1	other
St3gal1	0.00511959	0.0471888	0.123	0.068	1	other
Gosr2	0.0208921	0.0471771	0.405	0.301	1	other
Szt2	0.000117747	0.047151	0.184	0.092	1	other
Ap1ar	0.0381489	0.0471277	0.642	0.516	1	other
Strn4	0.0138094	0.0471132	0.456	0.336	1	other
Trpm2	0.00101439	0.0470749	0.208	0.121	1	other
Gaa	0.0192064	0.0470587	0.977	0.961	1	other
Gdi1	0.0505819	0.0470386	0.96	0.902	1	other
Mzt2	0.0052219	0.0470357	0.108	0.059	1	other
Gmds	0.00308196	0.0470352	0.089	0.043	1	other
Aptx	0.0139628	0.046989	0.222	0.15	1	other
Cops3	0.00922418	0.0469371	0.295	0.209	1	other
Tspyl5	0.0363577	0.0469219	0.472	0.361	1	other
Mettl14	0.00197517	0.0469186	0.152	0.084	1	other
Lrrc55	0.00147644	0.0469082	0.248	0.156	1	other
Scn8a	0.00739532	0.0469059	0.589	0.443	1	other
Wasf1	0.0264942	0.0468586	0.485	0.385	1	other
Uqcrq	0.0807271	0.0468497	0.835	0.725	1	other
Tk2	0.00320757	0.0468123	0.358	0.244	1	other
Srebf1	0.000792173	0.0467397	0.083	0.033	1	other
Gga3	0.00101717	0.0467278	0.341	0.219	1	other
Tmem19	0.000443476	0.0467227	0.28	0.168	1	other
Zfp597	0.0313245	0.0467118	0.252	0.182	1	other
Elp5	0.0145747	0.0467092	0.426	0.305	1	other
Cog8	0.00160021	0.0467037	0.252	0.162	1	other
Prmt7	0.012343	0.0467011	0.258	0.182	1	other
Phlda3	0.0366872	0.0466839	0.447	0.346	1	other
Slc38a10	0.00178768	0.0466804	0.273	0.176	1	other
Rps3a1	0.0149979	0.0466613	1	0.996	1	other
2610008E11Rik	0.017651	0.0466609	0.241	0.172	1	other
Apoo	0.00231601	0.0465985	0.189	0.113	1	other
Rps6ka4	0.00162122	0.0465773	0.165	0.094	1	other
Ywhab	0.0142781	0.0465467	0.989	0.984	1	other
Mpc1	0.0125562	0.0465458	0.547	0.424	1	other
Wdr7	0.301355	0.0465059	0.629	0.547	1	other
Ablim1	0.00692092	0.0464942	0.292	0.203	1	other
Kcnk1	0.00550049	0.0464934	0.237	0.156	1	other
Lrrn3	0.00795802	0.0464694	0.54	0.404	1	other
Vat1	0.0338136	0.0464467	0.945	0.842	1	other
Rnf41	0.04478	0.046443	0.557	0.43	1	other
Mpp3	0.000596112	0.0464139	0.214	0.123	1	other
B4galt2	0.00316764	0.0463877	0.318	0.217	1	other
Klf9	0.00180977	0.0463853	0.413	0.285	1	other
Zrsr1	0.0056809	0.0463761	0.545	0.408	1	other
Mmd	0.129076	0.0463693	0.684	0.584	1	other
Tfrc	0.0123237	0.0463143	0.386	0.289	1	other
Rgs11	0.00202573	0.0462533	0.216	0.135	1	other
B4galt6	0.0290895	0.0462434	0.96	0.922	1	other
Ric3	0.00839486	0.0462356	0.517	0.398	1	other
Phc2	0.00424428	0.0462156	0.333	0.229	1	other
Wipf2	0.00394982	0.0461915	0.525	0.385	1	other
Rbsn	0.00720382	0.0461315	0.377	0.268	1	other
Gars	0.00538557	0.0461051	0.182	0.113	1	other
Gtf2f2	0.00274364	0.0460453	0.104	0.053	1	other
Ammecr1l	0.00765372	0.0460072	0.339	0.234	1	other
Fbxw8	0.0101683	0.0459833	0.208	0.139	1	other
Dnajc27	0.0148878	0.045971	0.638	0.496	1	other
Gnl3l	0.0630858	0.045969	0.951	0.908	1	other
Tmem132e	0.00592269	0.0459569	0.244	0.16	1	other
Hcn2	0.00531247	0.0459494	0.239	0.156	1	other
Rfk	0.0163784	0.0458871	0.439	0.332	1	other
Snx25	0.00888552	0.0458869	0.231	0.156	1	other
Rps19	0.0892115	0.0458799	1	0.998	1	other
Ippk	0.00796997	0.0458191	0.123	0.072	1	other
Ddx3x	0.136221	0.0458165	0.814	0.717	1	other
Ppp1cb	0.0199615	0.0458015	0.869	0.771	1	other
Inafm2	0.0192368	0.0457992	0.218	0.15	1	other
Cacybp	0.082744	0.0457908	0.619	0.504	1	other
Mtrf1l	0.00252281	0.0457675	0.102	0.051	1	other
Ccdc43	0.00104238	0.0457556	0.231	0.137	1	other
Mtap	0.00131897	0.0457433	0.095	0.043	1	other
Rps9	0.015656	0.0457268	1	0.994	1	other
Gpr68	0.00121481	0.0457098	0.098	0.045	1	other
Rogdi	0.0152902	0.0457021	0.689	0.523	1	other
Aff3	0.00515272	0.0456769	0.261	0.174	1	other
Creb3l1	0.00722662	0.0456718	0.047	0.018	1	other
Mrpl47	0.00507864	0.0456672	0.165	0.1	1	other
Paqr7	0.0182057	0.0456665	0.318	0.234	1	other
Hs6st1	0.0129018	0.0456306	0.21	0.143	1	other
Cmip	0.00443376	0.045596	0.61	0.445	1	other
Mier2	0.00260481	0.0455943	0.206	0.127	1	other
Purg	0.00413147	0.0455919	0.182	0.111	1	other
Kcna1	0.00153965	0.045576	0.108	0.053	1	other
Tbcd	0.00630689	0.0455743	0.188	0.119	1	other
Ckmt1	0.00865544	0.0455288	0.576	0.439	1	other
Ralb	0.00356619	0.0455267	0.212	0.133	1	other
Tecpr1	0.0245536	0.045491	0.604	0.477	1	other
Zfp943	0.0108935	0.0454677	0.15	0.092	1	other
Rab11fip5	0.00365122	0.0454663	0.409	0.281	1	other
Akap6	0.0501207	0.0454663	0.767	0.623	1	other
Nol4	0.0164461	0.0454482	0.496	0.387	1	other
Tmem202	0.00277654	0.04543	0.07	0.029	1	other
Ap3b1	0.0405702	0.045428	0.161	0.113	1	other
Arfgef3	0.104786	0.0453141	0.913	0.859	1	other
Gm39244	0.00771008	0.0453112	0.081	0.041	1	other
Lamb1	0.00104052	0.0452927	0.072	0.027	1	other
Sel1l	0.086853	0.0452749	0.803	0.67	1	other
Polr3k	0.0155971	0.0452561	0.462	0.357	1	other
Grin1	0.0737975	0.0452319	0.799	0.68	1	other
Ranbp3	0.03294	0.0452314	0.352	0.27	1	other
Bcat1	0.0608914	0.0451984	0.513	0.408	1	other
Entpd5	0.00450913	0.0451452	0.155	0.092	1	other
Mrpl35	0.00553263	0.0451139	0.222	0.145	1	other
Dnajc10	0.00613895	0.0451105	0.547	0.404	1	other
Ubr4	0.00842894	0.0450944	0.525	0.389	1	other
Elovl5	0.00767318	0.0450252	0.333	0.232	1	other
Cds2	0.161394	0.0450049	0.947	0.846	1	other
Arf2	0.00798344	0.0449679	0.328	0.232	1	other
Chl1	0.0971935	0.0449443	0.788	0.729	1	other
Arl5a	0.131332	0.044943	0.58	0.496	1	other
Cadm3	0.161855	0.0449217	0.742	0.635	1	other
Tmem192	0.00633961	0.044914	0.402	0.295	1	other
Zfp583	0.0133116	0.0449115	0.091	0.051	1	other
Mthfd2	0.0185995	0.0448585	0.167	0.111	1	other
Sp3	0.0164723	0.0448452	0.273	0.195	1	other
Ankrd13c	0.0215315	0.0448424	0.491	0.367	1	other
Zrsr2	0.162759	0.0448209	0.659	0.543	1	other
Dst	0.0337785	0.044813	0.864	0.736	1	other
Tanc1	0.000501549	0.044735	0.066	0.021	1	other
Brs3	0.0785592	0.044712	0.222	0.172	1	other
Ube2l3	0.0945416	0.0447034	0.733	0.605	1	other
Twf2	0.00440252	0.0446904	0.11	0.059	1	other
Sema6b	0.0139597	0.0446602	0.5	0.375	1	other
Nup50	0.0259951	0.0446538	0.322	0.24	1	other
2900026A02Rik	0.00134952	0.0446462	0.161	0.09	1	other
Tmem55a	0.00344968	0.0446381	0.339	0.232	1	other
Cdh6	0.0252805	0.0446259	0.123	0.08	1	other
Dact1	0.0033812	0.0445908	0.127	0.07	1	other
Ddx55	0.0115433	0.044575	0.456	0.334	1	other
Mrrf	0.003612	0.0445449	0.169	0.1	1	other
Opa1	0.00910547	0.0445203	0.5	0.363	1	other
Slc29a4	0.00283953	0.0445114	0.254	0.166	1	other
Kpna3	0.0420953	0.0445069	0.606	0.479	1	other
Caskin1	0.00696988	0.0444805	0.572	0.426	1	other
Ankrd50	0.00447426	0.0444383	0.458	0.322	1	other
Fads3	0.0130696	0.0444288	0.138	0.086	1	other
Asic1	0.0182986	0.044421	0.415	0.318	1	other
Kifap3	0.250693	0.0443994	0.884	0.807	1	other
Taf15	0.0353654	0.0443849	0.396	0.303	1	other
Gpatch4	0.0283696	0.0443773	0.411	0.311	1	other
Rps6	0.183469	0.0443246	1	1	1	other
1110008F13Rik	0.0151171	0.0443171	0.328	0.234	1	other
Xylt1	0.000418783	0.0442706	0.098	0.041	1	other
Med30	0.00388001	0.0442493	0.201	0.123	1	other
Pom121	0.0392157	0.0441932	0.58	0.438	1	other
Dkc1	0.00848262	0.04419	0.269	0.186	1	other
Dnaja2	0.0496982	0.0441603	0.646	0.525	1	other
Mrpl51	0.0241749	0.0441032	0.496	0.377	1	other
Hnrnpk	0.172515	0.0440198	0.943	0.895	1	other
Adam10	0.0186898	0.044016	0.455	0.348	1	other
Htr1d	0.000137697	0.0439917	0.059	0.014	1	other
Tbl1xr1	0.0098944	0.0439636	0.222	0.148	1	other
Lss	0.0286671	0.0439017	0.14	0.094	1	other
Usp4	0.00322357	0.0438413	0.441	0.311	1	other
Mrpl52	0.0401675	0.043823	0.85	0.773	1	other
Znrf2	0.00825295	0.0438205	0.252	0.172	1	other
Zfp248	0.00869462	0.0437841	0.155	0.096	1	other
Neu1	0.0101538	0.0437632	0.301	0.215	1	other
Tfb2m	0.00125544	0.0437092	0.193	0.111	1	other
Rab6a	0.050934	0.043694	0.989	0.955	1	other
Metap1	0.00489167	0.0436451	0.462	0.324	1	other
Mpped1	0.0173866	0.0436243	0.208	0.145	1	other
Micall1	0.00234312	0.0436127	0.237	0.146	1	other
Abhd17b	0.0236797	0.0435685	0.348	0.258	1	other
Mettl9	0.0837506	0.0435622	0.585	0.477	1	other
Gdf11	0.0390571	0.0435613	0.242	0.18	1	other
Snrpd1	0.0301778	0.0435517	0.528	0.406	1	other
Rnf8	0.0141032	0.0435419	0.254	0.178	1	other
Nus1	0.0221057	0.0434946	0.608	0.482	1	other
Hspe1	0.0326853	0.0434535	0.907	0.793	1	other
Spata24	0.00179886	0.0434509	0.104	0.051	1	other
Prkaa1	0.00740403	0.0434359	0.318	0.221	1	other
Ttc19	0.0710964	0.0434	0.754	0.65	1	other
Yars	0.00704128	0.0433898	0.388	0.277	1	other
BC029722	0.0824511	0.0433659	0.877	0.752	1	other
Tomm70a	0.0465283	0.04336	0.831	0.711	1	other
Rps3	0.072872	0.0433303	1	0.996	1	other
Pgs1	0.0263038	0.04331	0.286	0.209	1	other
Bpnt1	0.0113137	0.0433063	0.509	0.377	1	other
Scn5a	0.0151415	0.0432961	0.174	0.115	1	other
Eny2	0.0514272	0.0432934	0.595	0.465	1	other
Tmem131	0.00633523	0.0432284	0.354	0.25	1	other
Ppp6c	0.019939	0.0432283	0.364	0.27	1	other
BC024978	0.00425053	0.04321	0.102	0.053	1	other
Zfp605	0.000980465	0.0432028	0.085	0.035	1	other
Rpl10a	0.0898351	0.0431949	0.994	0.992	1	other
Higd1a	0.088055	0.0431883	0.527	0.43	1	other
Tsc22d2	0.0182847	0.0431882	0.277	0.195	1	other
Slc7a14	0.0430725	0.0431552	0.714	0.574	1	other
Pkib	0.0013873	0.0431024	0.074	0.029	1	other
Slc25a14	0.0380884	0.0430584	0.312	0.234	1	other
9930021J03Rik	0.064508	0.0430528	0.449	0.355	1	other
Tkt	0.0223673	0.0430483	0.42	0.316	1	other
Patj	0.000415294	0.0430379	0.104	0.045	1	other
Prdm2	0.00937612	0.0430123	0.25	0.172	1	other
Etfbkmt	0.0060765	0.0429964	0.097	0.051	1	other
Shf	0.00118327	0.0429801	0.121	0.061	1	other
Fbxo33	0.0287492	0.0429107	0.636	0.492	1	other
Aars	0.0311211	0.0428914	0.341	0.258	1	other
Egln1	0.0191928	0.0428757	0.259	0.184	1	other
Mboat7	0.0574235	0.0428753	0.845	0.717	1	other
Rab43	0.00143474	0.0428467	0.083	0.035	1	other
Pusl1	0.000756503	0.0427994	0.18	0.102	1	other
Mapre2	0.0727531	0.0427857	0.841	0.725	1	other
Impa1	0.00970688	0.0427814	0.366	0.26	1	other
Ppp2r2a	0.0326376	0.0427787	0.544	0.436	1	other
Rwdd4a	0.026918	0.0427678	0.278	0.205	1	other
Fbxo25	0.00718076	0.0427642	0.509	0.373	1	other
Abcc8	0.00110282	0.0427147	0.081	0.033	1	other
Pmpca	0.00174259	0.0426922	0.347	0.227	1	other
Wdr37	0.0323968	0.0426113	0.614	0.484	1	other
Sptbn2	0.000553373	0.0426109	0.345	0.217	1	other
Them6	0.000948853	0.0426051	0.14	0.072	1	other
Tbcb	0.013811	0.0425785	0.483	0.363	1	other
Gtf2e1	0.00214899	0.0425747	0.144	0.078	1	other
Syt2	0.000408798	0.0425327	0.057	0.016	1	other
Sertm1	0.00612994	0.0425271	0.072	0.033	1	other
Ap2s1	0.0453936	0.0424885	0.517	0.414	1	other
Spryd3	0.0356454	0.0424808	0.627	0.494	1	other
Sap18	0.0136367	0.0424388	0.515	0.4	1	other
Ly6e	0.0173019	0.0423941	0.661	0.539	1	other
Eif5a2	0.00507446	0.042383	0.312	0.213	1	other
Cox8a	0.0796984	0.0423437	0.991	0.977	1	other
Vkorc1l1	0.00230296	0.042335	0.485	0.33	1	other
Aagab	0.0125377	0.0423153	0.275	0.195	1	other
Cdh15	0.00283497	0.0423054	0.121	0.064	1	other
Yipf1	0.000882353	0.0422936	0.189	0.107	1	other
Nmd3	0.0128002	0.0422621	0.29	0.205	1	other
Unc13c	0.0481662	0.0422545	0.106	0.07	1	other
Ubxn2b	0.00149297	0.0421624	0.339	0.217	1	other
Adcy7	0.0192479	0.0421224	0.206	0.143	1	other
Max	0.00789363	0.0421182	0.528	0.387	1	other
Tmem185a	0.0043923	0.0421078	0.301	0.205	1	other
Moxd1	0.00312904	0.0420799	0.038	0.01	1	other
Fkrp	0.0258133	0.0420679	0.335	0.248	1	other
Tspan13	0.182665	0.0420143	0.839	0.707	1	other
Hat1	0.00560109	0.0420091	0.078	0.037	1	other
Creg2	0.00164655	0.0420083	0.4	0.268	1	other
Phf21b	0.000762661	0.0419986	0.036	0.006	1	other
Atp6v0e2	0.0173845	0.0419873	0.896	0.799	1	other
Epb41l1	0.0901192	0.0419853	0.68	0.574	1	other
Pygb	0.02213	0.0419212	0.43	0.324	1	other
Stk32c	0.00102294	0.0419008	0.413	0.279	1	other
Mis12	0.00404751	0.0418967	0.191	0.119	1	other
Cyth3	0.0303318	0.041891	0.176	0.123	1	other
Mef2a	0.0512518	0.0418887	0.511	0.396	1	other
Cog3	0.000891623	0.0418667	0.169	0.092	1	other
Uchl5	0.00583334	0.0418667	0.335	0.23	1	other
Smarca4	0.00121832	0.0418323	0.453	0.32	1	other
Msantd4	0.0227148	0.0418282	0.519	0.393	1	other
Amz2	0.00688601	0.0418257	0.373	0.264	1	other
Ston2	0.0078625	0.0417897	0.169	0.105	1	other
Vegfb	0.142434	0.0417822	0.581	0.482	1	other
Zbtb48	0.00315665	0.0417701	0.087	0.041	1	other
Bysl	0.00262647	0.0417686	0.097	0.047	1	other
Cetn4	0.00974147	0.0417515	0.29	0.203	1	other
Abhd17a	0.0178288	0.0417253	0.475	0.348	1	other
Mief2	0.00836439	0.0417132	0.129	0.076	1	other
Rbak	0.00398599	0.0416734	0.068	0.029	1	other
Abcc1	0.00209003	0.0416141	0.14	0.076	1	other
Klhl9	0.0875441	0.0415948	0.744	0.629	1	other
Cryz	0.000462988	0.041583	0.057	0.016	1	other
Gsg1l	0.0295319	0.0415713	0.102	0.064	1	other
Rsl1d1	0.0205148	0.0415521	0.388	0.287	1	other
Rnpepl1	0.00650881	0.0415517	0.237	0.158	1	other
Ahcy	0.00530182	0.0415398	0.087	0.043	1	other
Enoph1	0.0192367	0.0415265	0.261	0.182	1	other
Dlst	0.0272679	0.0414966	0.511	0.395	1	other
Prkca	0.0161565	0.0414906	0.256	0.184	1	other
Tspan5	0.00597341	0.0414871	0.311	0.215	1	other
Cbln4	0.0427998	0.0414565	0.261	0.195	1	other
Harbi1	0.00679931	0.0414538	0.117	0.066	1	other
Ubac2	0.0283668	0.0414313	0.288	0.209	1	other
Mpnd	0.00546915	0.0414297	0.377	0.264	1	other
Gclc	0.020242	0.0414101	0.445	0.344	1	other
Dnaja1	0.0358255	0.0413885	0.898	0.797	1	other
Cycs	0.172713	0.0413689	0.693	0.58	1	other
Lrrc8b	0.019929	0.0413361	0.182	0.123	1	other
Zc3hc1	0.0273778	0.0413107	0.172	0.119	1	other
Pnpt1	0.0268199	0.0413049	0.208	0.146	1	other
Rab10	0.0245921	0.0412401	0.78	0.652	1	other
Ddx19b	0.00135717	0.0412359	0.098	0.045	1	other
Slco5a1	0.000426371	0.0412337	0.074	0.025	1	other
Rpf2	0.0238218	0.0412333	0.197	0.141	1	other
Cdk16	0.0104614	0.0411965	0.434	0.32	1	other
Armcx4	0.0153847	0.0411705	0.506	0.373	1	other
3632451O06Rik	0.00814042	0.0411447	0.189	0.119	1	other
Pprc1	0.00263292	0.0411244	0.102	0.051	1	other
Tcta	0.0409527	0.0411144	0.237	0.172	1	other
Rpgrip1l	0.000237073	0.0410766	0.223	0.123	1	other
Gm34006	0.0116892	0.0410278	0.1	0.057	1	other
Grip2	0.0318474	0.041003	0.155	0.105	1	other
Faap20	0.0142479	0.0409946	0.371	0.268	1	other
2310061I04Rik	0.0910656	0.0409784	0.447	0.354	1	other
Raly	0.0253627	0.0409577	0.299	0.223	1	other
Mcm3ap	0.00344292	0.0409559	0.186	0.113	1	other
Zfp518b	0.0157085	0.0409292	0.131	0.082	1	other
Scrn3	0.00644801	0.0409144	0.15	0.09	1	other
Kctd20	0.0240917	0.0409079	0.335	0.244	1	other
Mfsd11	0.0104758	0.0408834	0.312	0.221	1	other
Vamp4	0.0319973	0.040873	0.67	0.531	1	other
Midn	0.00336169	0.0408681	0.21	0.131	1	other
Slc31a1	0.00198199	0.0408231	0.129	0.068	1	other
Plscr4	0.000133255	0.0408216	0.062	0.016	1	other
Vps45	0.0577909	0.0407729	0.123	0.086	1	other
Zfp719	0.00769185	0.0407652	0.146	0.086	1	other
Gucy1b1	0.00867795	0.0407443	0.456	0.334	1	other
Ppp1r37	0.00543133	0.0406812	0.364	0.254	1	other
Pag1	0.0214423	0.0406735	0.191	0.131	1	other
Hectd2	0.00894949	0.0406693	0.108	0.061	1	other
Rasd2	0.0912695	0.0406396	0.316	0.25	1	other
Ehd4	0.0194758	0.0406368	0.172	0.115	1	other
Mafb	0.00294376	0.0406347	0.042	0.012	1	other
Gm49336	0.0393345	0.0406066	0.377	0.285	1	other
Mgat1	0.0109122	0.0405388	0.335	0.238	1	other
Adh7	0.00183421	0.0405254	0.044	0.012	1	other
Ccdc160	0.0010592	0.0405242	0.062	0.021	1	other
Actn4	0.00709954	0.0404988	0.312	0.219	1	other
Dcbld2	0.00243865	0.0404286	0.191	0.115	1	other
Smarca5	0.114385	0.0404164	0.686	0.568	1	other
Trpt1	0.0102691	0.0404117	0.163	0.102	1	other
Ppp1r9b	0.00798273	0.040321	0.561	0.406	1	other
Enpp4	0.0077252	0.0402868	0.125	0.072	1	other
Pithd1	0.0940187	0.0402499	0.595	0.492	1	other
Snrpa1	0.0306571	0.040245	0.352	0.266	1	other
Asb16	0.00160415	0.0402274	0.08	0.033	1	other
Zfp763	0.0033379	0.0402089	0.159	0.092	1	other
Azin1	0.0259792	0.0401681	0.479	0.365	1	other
Itpa	0.00878678	0.0400997	0.345	0.242	1	other
Flot2	0.0516342	0.0400341	0.574	0.447	1	other
Fam19a2	0.00900912	0.0400134	0.295	0.207	1	other
Eif3b	0.0158071	0.0399964	0.379	0.283	1	other
Sdccag3	0.0162202	0.0399743	0.366	0.271	1	other
Rrp7a	0.0520914	0.0399679	0.506	0.41	1	other
Dlx1	0.0339892	0.0399568	0.879	0.766	1	other
Rbfa	0.00624113	0.039866	0.212	0.139	1	other
Zscan18	0.0511038	0.0398508	0.301	0.232	1	other
Usp39	0.0160409	0.0398485	0.136	0.086	1	other
Ankrd13b	0.00619502	0.0398176	0.252	0.17	1	other
Spr	0.0399621	0.0398039	0.206	0.152	1	other
Lrguk	0.000179064	0.0397825	0.045	0.008	1	other
Nt5c3	0.0107564	0.0397719	0.428	0.307	1	other
Larp1b	0.00138536	0.0397643	0.127	0.064	1	other
Fam161b	0.000385156	0.0397368	0.21	0.117	1	other
Gpr45	0.00744345	0.0397108	0.261	0.178	1	other
Pitpnm3	0.00628203	0.039704	0.309	0.215	1	other
Wdr75	0.00428852	0.0396878	0.153	0.09	1	other
Setx	0.00273926	0.0396731	0.428	0.299	1	other
Prpf31	0.0213874	0.0396554	0.307	0.217	1	other
Hsp90aa1	0.0289821	0.0396384	0.981	0.961	1	other
Mrpl42	0.0104064	0.0396309	0.606	0.457	1	other
Mirg	0.0111515	0.0396135	0.572	0.436	1	other
Ampd2	0.108696	0.0396107	0.515	0.428	1	other
Sptb	0.0103692	0.0396076	0.248	0.17	1	other
Gys1	0.00132617	0.0395956	0.087	0.037	1	other
Mrpl33	0.0273503	0.0395832	0.591	0.457	1	other
Dstn	0.100294	0.039579	0.767	0.656	1	other
AU040320	0.0341032	0.0395041	0.263	0.195	1	other
Gm20300	0.0311642	0.039502	0.322	0.24	1	other
Ppp3cb	0.116828	0.0394987	0.845	0.754	1	other
Mapk14	0.0112291	0.0394627	0.375	0.27	1	other
Ptp4a3	0.00763086	0.0393921	0.205	0.133	1	other
Gpr137b	0.00276894	0.0393912	0.064	0.025	1	other
Rap2b	0.0158712	0.0393506	0.417	0.311	1	other
Gpr6	0.00105941	0.0393456	0.076	0.029	1	other
Tmem110	0.00284401	0.0393425	0.178	0.105	1	other
Olfr889	0.000190643	0.0392755	0.064	0.018	1	other
Ccnyl1	0.000317489	0.0392611	0.055	0.014	1	other
Nfatc3	0.0126045	0.0392218	0.134	0.084	1	other
Csrnp3	0.067075	0.0391801	0.782	0.625	1	other
Syne2	0.0123439	0.0391797	0.25	0.172	1	other
Rhot2	0.0573172	0.039143	0.324	0.25	1	other
Parp8	0.00908547	0.039138	0.212	0.139	1	other
Aifm3	0.0138866	0.0390848	0.331	0.238	1	other
Ngrn	0.019695	0.0390309	0.417	0.305	1	other
Erg28	0.00810068	0.0390151	0.438	0.305	1	other
Ganab	0.0156956	0.0390117	0.502	0.377	1	other
AC165953.2	0.0800143	0.0389971	0.277	0.211	1	other
Psap	0.049841	0.0389752	0.985	0.961	1	other
Vwa8	0.00354319	0.038973	0.138	0.078	1	other
Zfp994	0.00598524	0.0389311	0.083	0.041	1	other
Rnf185	0.0136336	0.0389198	0.188	0.125	1	other
Strap	0.0307058	0.0389137	0.669	0.529	1	other
Creg1	0.00431637	0.0388871	0.163	0.098	1	other
Lrsam1	0.00521263	0.038875	0.244	0.162	1	other
Tpgs2	0.00274184	0.0388732	0.286	0.188	1	other
Bcap29	0.0500327	0.038863	0.443	0.348	1	other
9530077C05Rik	0.00553961	0.0388563	0.15	0.088	1	other
Mak16	0.0158963	0.0388531	0.229	0.158	1	other
Bzw1	0.0262236	0.0388529	0.517	0.391	1	other
Sprn	0.00458083	0.0388387	0.269	0.178	1	other
Pcyt1a	0.00531936	0.0387909	0.182	0.113	1	other
Vwc2	0.00087951	0.0387845	0.176	0.1	1	other
Htr1a	0.0231502	0.0387656	0.072	0.039	1	other
Cklf	0.00509078	0.0387238	0.235	0.152	1	other
Gpkow	0.0114091	0.0386952	0.256	0.174	1	other
2900011O08Rik	0.1176	0.0386789	0.794	0.695	1	other
Ppp2r5b	0.00511483	0.0386774	0.494	0.354	1	other
Alyref	0.0054993	0.0386729	0.17	0.104	1	other
Uba1	0.0988782	0.038663	0.534	0.418	1	other
Hmgxb3	0.0159114	0.0386392	0.157	0.102	1	other
Nsg1	0.157343	0.0386029	0.975	0.928	1	other
Usp14	0.0188978	0.0385823	0.638	0.492	1	other
Clptm1	0.0123315	0.0385722	0.54	0.416	1	other
Selenot	0.103326	0.0385661	0.797	0.705	1	other
Kcnj6	0.000905529	0.0385628	0.116	0.055	1	other
Klhl20	0.00707065	0.0385625	0.216	0.141	1	other
Adgra1	0.0489138	0.038529	0.472	0.373	1	other
Pgp	0.0153373	0.0385261	0.371	0.271	1	other
Gstm6	0.000596116	0.0385172	0.301	0.188	1	other
Wbp11	0.0503218	0.0384194	0.695	0.574	1	other
Tnip1	0.0220238	0.0383808	0.146	0.096	1	other
Ube4b	0.0718504	0.0383504	0.597	0.488	1	other
C330007P06Rik	0.0285676	0.0383474	0.225	0.162	1	other
Arpc4	0.0831822	0.0383419	0.445	0.348	1	other
Rps7	0.184833	0.0383222	0.998	0.998	1	other
Net1	0.0668875	0.0383009	0.066	0.041	1	other
Tspan3	0.120349	0.0382628	0.792	0.695	1	other
Mpg	0.0393758	0.0382144	0.25	0.188	1	other
Jmjd1c	0.0131621	0.0381838	0.572	0.43	1	other
Chmp7	0.00821673	0.0381775	0.479	0.35	1	other
Gem	0.00288774	0.0381549	0.042	0.012	1	other
L3mbtl2	0.0200703	0.0381401	0.184	0.125	1	other
Zbtb2	0.00936654	0.0380993	0.066	0.031	1	other
Zfp711	0.00497175	0.0380291	0.148	0.086	1	other
Tmem26	0.0342396	0.0379995	0.127	0.084	1	other
Prps2	0.0134717	0.0379858	0.152	0.096	1	other
Trappc2	0.0386112	0.0379779	0.432	0.334	1	other
Idh3b	0.384122	0.0379622	0.631	0.557	1	other
Slitrk2	0.0411107	0.0379308	0.366	0.275	1	other
Dnajc3	0.0216744	0.0379299	0.322	0.238	1	other
Gm16638	0.00493891	0.0379237	0.091	0.045	1	other
Mrps21	0.0730529	0.037915	0.576	0.451	1	other
Tagap1	0.0189953	0.0378788	0.384	0.285	1	other
Garem1	0.00655293	0.0378733	0.116	0.064	1	other
Lman2	0.0735327	0.037864	0.417	0.328	1	other
Fkbp8	0.0578294	0.0378245	0.761	0.631	1	other
Tmem241	0.0043151	0.0378094	0.121	0.066	1	other
Slc22a23	0.00590906	0.037806	0.186	0.117	1	other
Trim46	0.0320092	0.0378022	0.366	0.275	1	other
Adap1	0.00622942	0.037793	0.441	0.309	1	other
Egr1	0.0071101	0.0377658	0.087	0.045	1	other
Zfp575	0.0826492	0.0377624	0.134	0.098	1	other
Pigb	0.00313208	0.0377588	0.123	0.066	1	other
Mrpl58	0.0100665	0.0377388	0.275	0.195	1	other
Pfas	0.0188466	0.0377346	0.28	0.203	1	other
Acot8	0.0224017	0.0377104	0.14	0.092	1	other
Tmem104	0.0117829	0.0376771	0.112	0.066	1	other
Zfp771	0.00745304	0.0376714	0.341	0.232	1	other
Eif2s3x	0.00644832	0.0376561	0.544	0.41	1	other
Pabpc4	0.0121869	0.0376325	0.195	0.127	1	other
Uxs1	0.00923725	0.0376291	0.254	0.17	1	other
Dcaf7	0.0587469	0.0376273	0.903	0.801	1	other
Mpc2	0.0093501	0.0375748	0.447	0.318	1	other
Ndufaf5	0.00168857	0.0375376	0.205	0.121	1	other
Homez	0.00973927	0.0375212	0.102	0.057	1	other
Mdm2	0.00781382	0.0375033	0.305	0.211	1	other
Pepd	0.0136386	0.037489	0.089	0.049	1	other
Dnajb11	0.00170067	0.0374829	0.282	0.176	1	other
Cdr2l	0.00341396	0.0374555	0.169	0.1	1	other
Rasd1	0.00151106	0.0374529	0.055	0.018	1	other
Gm42418	0.0290714	0.0374442	0.712	0.562	1	other
Fam210b	0.000450068	0.0374371	0.098	0.041	1	other
Aff4	0.225897	0.037428	0.894	0.814	1	other
Rnf216	0.0162255	0.0373956	0.25	0.174	1	other
Fam45a	0.00982553	0.037372	0.301	0.209	1	other
Lypd6b	0.040679	0.0373346	0.182	0.129	1	other
Dennd5a	0.0242045	0.0373268	0.6	0.465	1	other
6030419C18Rik	0.00768214	0.0372822	0.375	0.26	1	other
Sh3glb2	0.00488422	0.0372818	0.532	0.389	1	other
Ssr3	0.18853	0.0372577	0.729	0.604	1	other
Pigp	0.0111294	0.0372378	0.225	0.152	1	other
Tmem245	0.0776545	0.0372134	0.58	0.463	1	other
Gm28884	0.000207973	0.03721	0.049	0.01	1	other
Vars2	0.00288351	0.0371835	0.155	0.09	1	other
Celsr3	0.035797	0.0371822	0.252	0.188	1	other
Derl2	0.0163467	0.0371564	0.248	0.174	1	other
Lrp12	0.0103805	0.0371549	0.252	0.17	1	other
Cish	0.000278382	0.0371336	0.07	0.021	1	other
Wipf3	0.0165714	0.0371308	0.195	0.133	1	other
Rlim	0.0255922	0.0371232	0.506	0.381	1	other
Pou6f2	0.0231011	0.0371113	0.153	0.102	1	other
Phf20	0.0917518	0.0370817	0.483	0.402	1	other
Radil	0.00533282	0.0370704	0.146	0.086	1	other
Srrd	0.0149738	0.0370553	0.195	0.129	1	other
Rangrf	0.00199072	0.0370499	0.072	0.029	1	other
Xkr6	0.00266902	0.0370359	0.201	0.123	1	other
Mrps24	0.0680211	0.0370277	0.559	0.453	1	other
Slc46a3	0.00108916	0.0370217	0.053	0.016	1	other
Zfp668	0.00122714	0.0370006	0.153	0.084	1	other
Slc4a3	0.0308935	0.0369853	0.5	0.383	1	other
Smpd4	0.00293795	0.0369791	0.114	0.059	1	other
Mfsd4b4	0.0036214	0.0369749	0.093	0.045	1	other
Ints3	0.0311903	0.0369176	0.405	0.299	1	other
Grm1	0.0328848	0.0369165	0.189	0.133	1	other
Clip4	0.0122797	0.0369077	0.379	0.268	1	other
Polr3c	0.00411836	0.0368772	0.142	0.08	1	other
1110051M20Rik	0.0425159	0.0368598	0.438	0.34	1	other
Ssb	0.0392076	0.0368364	0.697	0.572	1	other
Rnf150	0.0229936	0.0367948	0.263	0.189	1	other
Apmap	0.003274	0.0367862	0.286	0.188	1	other
Gad1	0.127848	0.0367836	0.881	0.812	1	other
Pla2g12a	0.0405649	0.0366544	0.39	0.287	1	other
H1fx	0.00102509	0.0365931	0.301	0.189	1	other
Gm26982	0.00509305	0.0365612	0.064	0.027	1	other
Gm15952	0.0368529	0.0365159	0.066	0.037	1	other
Tram1	0.00672499	0.0364865	0.4	0.287	1	other
Lzts1	0.0281496	0.0364723	0.22	0.158	1	other
Irs1	0.00351635	0.036467	0.121	0.064	1	other
Gatad1	0.0830301	0.0364636	0.58	0.471	1	other
Zfp746	0.000519844	0.0364549	0.241	0.139	1	other
Ankrd9	0.00582314	0.0364326	0.089	0.045	1	other
Wtap	0.0221519	0.0364181	0.528	0.42	1	other
Scn2a	0.201886	0.0364007	0.966	0.91	1	other
Fam126b	0.141154	0.0363896	0.748	0.629	1	other
Ankrd34c	0.000725615	0.0363342	0.04	0.008	1	other
Lrrc3	0.00252973	0.0363165	0.119	0.062	1	other
Efhd2	0.0498092	0.0363082	0.716	0.592	1	other
Usp38	0.00467397	0.0362661	0.133	0.074	1	other
Ddb1	0.0672667	0.0362659	0.511	0.41	1	other
Ltv1	0.00613485	0.0362587	0.085	0.043	1	other
Tbk1	0.0281052	0.0361954	0.282	0.209	1	other
Rps15a	0.131015	0.036173	1	0.996	1	other
Jrkl	0.0109392	0.0361676	0.157	0.1	1	other
Copa	0.102511	0.036148	0.653	0.531	1	other
Myl12a	0.00240441	0.0361388	0.095	0.045	1	other
Clec16a	0.00813104	0.0361229	0.208	0.135	1	other
Ptdss1	0.0367288	0.03607	0.47	0.371	1	other
Fam219b	0.0037353	0.0360297	0.25	0.162	1	other
Fbn2	0.000646321	0.0360043	0.119	0.057	1	other
Spcs1	0.121231	0.0360037	0.597	0.477	1	other
Pdlim7	0.0169617	0.035988	0.413	0.305	1	other
Gdap10	0.00191304	0.0359874	0.076	0.031	1	other
Rnft2	0.0564953	0.0359805	0.348	0.268	1	other
Kbtbd4	0.00989375	0.0359519	0.195	0.127	1	other
Kcnab1	0.0352842	0.0359457	0.155	0.105	1	other
Taf12	0.00227798	0.0359207	0.146	0.08	1	other
Slc6a7	0.00855615	0.0359125	0.415	0.295	1	other
Mon1b	0.00552209	0.0359093	0.134	0.076	1	other
Mindy4	0.000315334	0.035881	0.044	0.008	1	other
Pnrc1	0.0076817	0.0358714	0.337	0.232	1	other
Slc35f1	0.0285446	0.0358685	0.356	0.268	1	other
Prdm11	0.0154113	0.0358569	0.127	0.078	1	other
C1ql2	0.0384734	0.0358067	0.047	0.023	1	other
Gatad2a	0.000972037	0.0358028	0.261	0.158	1	other
Gfpt1	0.184457	0.0357997	0.544	0.469	1	other
[truncated: 15,056 more rows]
