# Supplementary material for: Esr1-dependent signaling and transcriptional maturation in the medial preoptic area of the hypothalamus shape the development of mating behavior during adolescence
Source: eLife. 2026 Jun 19;14:RP106347. doi: 10.7554/eLife.106347 (PMC13282117; doi:10.7554/eLife.106347)
Supplement: Supplementary file 9. [file elife-106347-supp9.xlsx]

## Sheet: P50FvsEsr1KOF_VgatEsr1
	p_val	avg_logFC	pct.1	pct.2	p_val_adjust	gene_category
Rps27rt	1.88417e-93	1.17458	0.969	0.288	3.14582e-89	Other
Esr1	6.24158e-86	1.10598	0.887	0.161	1.04203e-81	Esr1
mt-Atp6	2.03918e-113	1.02588	1	1	3.40543e-109	Other
mt-Co2	2.04887e-106	0.949241	1	0.995	3.4214e-102	Other
mt-Nd4	6.84607e-97	0.850453	1	0.987	1.14309e-92	Other
Fgfr1	7.204e-24	0.816205	0.693	0.303	1.19731e-19	gene_expression
mt-Nd1	7.48233e-103	0.77774	1	1	1.2494e-98	Other
Pgr	7.46906e-57	0.731032	0.786	0.159	1.24621e-52	Other
Pdzrn4	2.5451e-47	0.688019	0.79	0.21	4.24497e-43	Other
mt-Nd2	1.21643e-77	0.684422	1	0.978	2.03035e-73	Other
Wdr89	3.45856e-62	0.675507	0.747	0.115	5.77131e-58	Other
Rpl22l1	8.15863e-76	0.672783	1	0.965	1.36168e-71	gene_expression
Lrp1b	3.60216e-41	0.67251	0.953	0.434	6.00443e-37	Other
mt-Nd3	8.92963e-53	0.652545	0.996	0.754	1.48964e-48	Other
Fstl5	3.30777e-43	0.648077	0.829	0.277	5.51505e-39	Other
Tmem35a	2.00916e-34	0.628961	0.607	0.159	3.34746e-30	Other
mt-Cytb	5.87168e-80	0.618754	1	1	9.80101e-76	Other
Nts	4.07997e-13	0.615337	0.401	0.164	6.69074e-09	Other
Tmcc3	2.78255e-34	0.613978	0.879	0.403	4.63572e-30	Other
Olfm3	6.99323e-37	0.595723	0.693	0.19	1.16535e-32	Other
Tpt1	4.48666e-42	0.589957	0.984	0.73	7.47927e-38	Other
Ogt	1.46944e-30	0.589774	0.981	0.653	2.44632e-26	gene_expression
Tmem158	5.39215e-28	0.56666	0.903	0.443	8.97361e-24	Other
Lrfn5	3.40878e-32	0.551671	0.957	0.504	5.678e-28	morphology
Pcp4	4.38696e-29	0.530291	1	0.953	7.3021e-25	morphology
Chl1	5.1669e-25	0.527952	0.778	0.358	8.59307e-21	Other
Pcdh7	5.41741e-28	0.526407	0.891	0.453	9.01511e-24	Other
Gda	9.14421e-28	0.524245	0.833	0.361	1.5215e-23	morphology
Meg3	8.87966e-43	0.512508	1	1	1.48042e-38	Other
Eif1b	1.71592e-31	0.506352	0.977	0.672	2.8577e-27	gene_expression
Rpl12	4.76882e-37	0.505384	1	0.854	7.94771e-33	gene_expression
Zbtb20	3.265e-20	0.504852	0.965	0.746	5.41631e-16	Esr1-TF
Ntng1	4.1651e-24	0.500236	0.883	0.449	6.92364e-20	morphology
Plcb4	2.38889e-25	0.495189	0.751	0.299	3.97344e-21	Other
Nrip1	2.79031e-31	0.494957	0.467	0.091	4.64642e-27	gene_expression
Nop56	9.9789e-29	0.491407	0.813	0.308	1.66089e-24	gene_expression
Rps24	7.55398e-55	0.485949	1	0.987	1.26031e-50	gene_expression
Rps12	1.67393e-42	0.484957	1	0.965	2.7906e-38	Other
Unc5d	7.71761e-19	0.478914	0.813	0.442	1.27881e-14	Other
Rpl9-ps6	2.60221e-43	0.476058	0.498	0.058	4.33892e-39	Other
Irs4	1.27675e-22	0.475325	0.934	0.628	2.12119e-18	Other
Gm9493	2.45212e-43	0.47468	0.44	0.038	4.08891e-39	Other
Rpl30	1.46193e-39	0.468376	1	0.934	2.43675e-35	gene_expression
Rpl10-ps3	1.88797e-38	0.466486	0.607	0.12	3.14667e-34	Other
Eef1b2	1.04439e-26	0.458807	0.965	0.611	1.73745e-22	gene_expression
mt-Co3	1.55662e-74	0.452895	1	1	2.59784e-70	Other
Maf	1.64695e-30	0.448832	0.342	0.038	2.74167e-26	Other
Npm1	9.62804e-26	0.443268	0.988	0.807	1.60153e-21	gene_expression
Tcaf1	7.07268e-23	0.438435	0.879	0.436	1.17527e-18	Other
Uqcrb	5.59998e-28	0.434937	0.813	0.285	9.31837e-24	energy
Eef1a1	9.12039e-48	0.434538	1	1	1.52128e-43	gene_expression
Rpl39	2.11563e-35	0.422939	1	0.949	3.52528e-31	gene_expression
Pak3	7.43031e-25	0.417793	0.992	0.807	1.23566e-20	morphology
Kcns2	1.31331e-32	0.416358	0.494	0.093	2.18771e-28	gene_expression
Nexmif	1.66038e-27	0.416182	0.584	0.161	2.76254e-23	Other
Prlr	9.00389e-15	0.408267	0.852	0.511	1.48285e-10	Other
Napb	4.26258e-13	0.398764	0.961	0.73	6.98935e-09	Other
Pgrmc1	1.92981e-21	0.395935	0.961	0.695	3.20464e-17	Other
Sez6l	1.04525e-18	0.394687	0.934	0.564	1.73156e-14	Other
Id4	3.78272e-18	0.391595	0.732	0.33	6.26229e-14	Other
Gm2000	3.97947e-34	0.391418	0.568	0.117	6.62939e-30	Other
Kcnq1ot1	4.62289e-19	0.388895	0.973	0.65	7.66059e-15	Other
Prkce	4.04251e-16	0.388284	0.778	0.396	6.67499e-12	gene_expression
Ctnna2	6.30656e-21	0.386015	0.665	0.243	1.04676e-16	morphology
Arfgef3	4.50089e-17	0.385351	0.942	0.562	7.44447e-13	Other
Spock3	8.90381e-19	0.381526	0.654	0.265	1.47518e-14	Other
Sccpdh	5.35531e-21	0.378479	0.732	0.286	8.89088e-17	Other
Unc80	4.3218e-20	0.371375	0.946	0.515	7.1677e-16	Other
Ptp4a1	1.3473e-18	0.369114	0.883	0.454	2.23153e-14	Other
Atp1b3	4.57039e-17	0.368234	0.728	0.328	7.55852e-13	gene_expression
Neo1	2.13562e-20	0.367496	0.502	0.153	3.54385e-16	Other
Ube2v2	1.29168e-22	0.366517	0.767	0.299	2.14587e-18	gene_expression
Dgkb	4.94776e-16	0.364918	0.813	0.449	8.16726e-12	Other
2010107E04Rik	2.38654e-16	0.363827	0.817	0.411	3.94233e-12	Other
Pde1c	6.77284e-21	0.362877	0.619	0.214	1.12402e-16	Other
Ralgps2	3.31748e-19	0.360538	0.541	0.182	5.49839e-15	Other
Nap1l5	1.79587e-27	0.359607	0.992	1	2.98778e-23	Other
1500009L16Rik	8.97472e-17	0.359122	0.767	0.356	1.48379e-12	Other
Scg2	1.18864e-17	0.358705	1	0.887	1.9672e-13	gene_expression
Brinp2	1.98688e-22	0.353869	0.611	0.201	3.30061e-18	morphology
Nrsn1	6.15881e-21	0.352703	0.996	0.838	1.0223e-16	morphology
Hsph1	4.23427e-17	0.351752	0.93	0.557	7.00434e-13	gene_expression
Htr1b	7.04979e-20	0.351642	0.424	0.115	1.169e-15	synapse_excitability
Rpl23	1.25437e-31	0.350776	1	0.993	2.08915e-27	gene_expression
Ets2	1.71526e-19	0.350597	0.7	0.281	2.84373e-15	Other
Elavl4	5.13179e-15	0.348344	0.918	0.571	8.45513e-11	gene_expression
Smim10l1	3.52464e-17	0.346467	0.953	0.573	5.83152e-13	Other
Enah	6.77117e-09	0.344811	0.907	0.622	0.000107878	morphology
Tcp1	2.441e-16	0.343325	0.879	0.478	4.03205e-12	gene_expression
Hs3st5	7.51381e-25	0.343059	0.436	0.095	1.24947e-20	gene_expression
Hpcal1	1.632e-19	0.340477	0.895	0.443	2.70585e-15	Other
5330434G04Rik	3.73959e-19	0.3392	0.794	0.338	6.19725e-15	Other
Tead1	4.55355e-17	0.337391	0.506	0.181	7.53112e-13	Other
Rps10	6.74883e-24	0.334803	1	0.943	1.12172e-19	Esr1-TF
Parm1	6.10358e-20	0.334022	0.451	0.131	1.01216e-15	gene_expression
Hspa5	1.56803e-16	0.333563	0.7	0.303	2.59117e-12	gene_expression
Prkacb	2.54289e-18	0.330134	0.988	0.865	4.21076e-14	Other
Rps3a1	2.37524e-31	0.32969	1	0.995	3.95549e-27	Other
Nos1ap	2.9843e-24	0.326836	0.638	0.197	4.9617e-20	gene_expression
Rbbp7	1.99839e-16	0.326705	0.584	0.232	3.30175e-12	Other
Zmat4	2.19147e-19	0.326473	0.518	0.168	3.63237e-15	Esr1-TF
Rps20	8.62554e-22	0.324655	1	0.942	1.43262e-17	gene_expression
Rpl5	2.97601e-16	0.323948	0.996	0.768	4.91548e-12	gene_expression
Ola1	9.42941e-22	0.323322	0.525	0.151	1.56604e-17	Other
Maged1	1.68965e-14	0.321977	0.977	0.717	2.78133e-10	Other
Fndc9	1.90479e-19	0.32115	0.646	0.235	3.15776e-15	Other
Gabrq	2.10586e-14	0.318972	0.708	0.354	3.46582e-10	synapse_excitability
Serinc1	2.94721e-18	0.316066	0.988	0.808	4.8797e-14	Other
Rpl36a-ps1	4.18046e-32	0.316015	0.3	0.018	6.96298e-28	Other
Gpbp1	2.36235e-20	0.314472	0.661	0.241	3.91961e-16	Other
Il1rap	2.41099e-24	0.313368	0.393	0.077	4.00875e-20	Other
mt-Nd5	8.94947e-17	0.311617	0.965	0.668	1.47971e-12	Other
Arhgef9	8.96929e-16	0.310076	0.833	0.418	1.47984e-11	Other
Rad23b	1.8801e-15	0.308681	0.798	0.405	3.10122e-11	gene_expression
Socs2	3.80832e-14	0.307159	0.475	0.181	6.26431e-10	Other
Penk	5.44936e-08	0.30388	0.401	0.195	0.000852444	synapse_excitability
Ppp3ca	3.90824e-13	0.302404	0.984	0.75	6.40951e-09	Other
Hsp90b1	1.5149e-12	0.301894	0.864	0.489	2.47913e-08	gene_expression
Apoc3	2.16763e-19	0.301616	0.455	0.131	3.59328e-15	gene_expression
Ssr3	3.27257e-15	0.296879	0.732	0.327	5.39516e-11	Other
Snn	2.24073e-24	0.296639	0.634	0.19	3.72588e-20	Other
Eif4g2	2.09588e-14	0.294736	0.984	0.785	3.44961e-10	gene_expression
Map2	2.74657e-13	0.294321	0.973	0.686	4.50657e-09	morphology
Fam46a	1.16642e-17	0.293323	0.486	0.159	1.93054e-13	Other
Snhg12	3.82655e-14	0.289985	0.817	0.389	6.2939e-10	Other
Neto2	4.34947e-16	0.28795	0.362	0.104	7.18053e-12	Other
Itfg1	6.42796e-12	0.287696	0.778	0.416	1.04943e-07	Other
Chpt1	8.6503e-19	0.28669	0.451	0.131	1.43327e-14	gene_expression
Prickle2	4.00673e-17	0.285374	0.533	0.19	6.62833e-13	Other
Pdia3	3.99589e-21	0.284702	0.584	0.182	6.63438e-17	gene_expression
Plcxd3	3.14426e-22	0.283145	0.537	0.148	5.22262e-18	Other
Polr2k	1.56616e-19	0.281337	0.646	0.226	2.59686e-15	gene_expression
Ptpro	1.91486e-15	0.281079	0.755	0.354	3.15837e-11	morphology
Hsp90aa1	1.01451e-16	0.281063	0.984	0.832	1.67709e-12	gene_expression
Odc1	2.88742e-13	0.280693	0.634	0.286	4.73711e-09	Other
Srsf3	3.69752e-13	0.27973	0.883	0.5	6.0643e-09	gene_expression
Map2k1	3.03643e-12	0.277612	0.809	0.456	4.96366e-08	gene_expression
Ccnb1ip1	1.38248e-12	0.277021	0.436	0.17	2.26297e-08	Other
Naaa	1.88534e-21	0.276867	0.377	0.082	3.13099e-17	Other
Tsr2	1.36366e-15	0.274875	0.681	0.281	2.2495e-11	gene_expression
Scml4	9.89608e-23	0.27473	0.358	0.068	1.64423e-18	Other
Khdrbs1	1.26214e-16	0.273724	0.673	0.27	2.08606e-12	gene_expression
Prrt1	4.89945e-14	0.27296	0.654	0.292	8.05567e-10	Other
Cntnap2	1.1755e-11	0.271729	0.852	0.522	1.91606e-07	morphology
2010005H15Rik	2.30746e-18	0.271725	0.401	0.108	3.82115e-14	Other
R3hdm1	1.64417e-13	0.271641	0.872	0.478	2.6994e-09	Other
Rab27b	3.19762e-15	0.271277	0.708	0.296	5.27223e-11	gene_expression
Pcdh15	3.66412e-13	0.270192	0.482	0.193	6.01025e-09	morphology
Chml	7.52382e-23	0.269029	0.319	0.051	1.25016e-18	Other
Gm26699	2.0112e-18	0.268222	0.588	0.199	3.33074e-14	Other
Cdh8	6.52118e-21	0.268043	0.385	0.088	1.08232e-16	Other
Drp2	9.32657e-19	0.26804	0.377	0.095	1.54513e-14	Other
Pard3	4.1721e-16	0.267426	0.432	0.139	6.88855e-12	morphology
Fut8	7.05211e-15	0.267196	0.568	0.219	1.16155e-10	gene_expression
Tatdn1	4.17447e-16	0.267069	0.63	0.246	6.89204e-12	Other
Large1	2.19758e-20	0.26684	0.444	0.117	3.64644e-16	gene_expression
Rps4x	2.5433e-20	0.265905	1	0.995	4.21958e-16	gene_expression
Anks1b	3.08502e-11	0.265261	0.782	0.434	5.01378e-07	Other
Tmem255a	1.51605e-10	0.264539	0.914	0.589	2.45281e-06	Other
Rpl7	1.40691e-14	0.264252	1	0.905	2.31634e-10	gene_expression
Phyhipl	3.87349e-14	0.264152	0.665	0.294	6.37034e-10	Other
Eif4a2	1.75755e-13	0.260654	1	0.96	2.8852e-09	gene_expression
Rtn4	4.1712e-11	0.260102	0.895	0.602	6.77278e-07	morphology
Bicd1	1.5428e-12	0.259876	0.794	0.403	2.52463e-08	gene_expression
Efna5	6.58324e-12	0.259607	0.895	0.526	1.07471e-07	morphology
Nos1	5.94122e-09	0.258662	0.459	0.224	9.47149e-05	Other
Astn1	2.42468e-12	0.258216	0.895	0.549	3.96484e-08	Other
Rpl22	2.25757e-10	0.257228	0.934	0.589	3.64868e-06	gene_expression
Lingo2	2.00882e-14	0.257183	0.7	0.305	3.30653e-10	morphology
Slitrk1	3.07408e-14	0.256903	0.595	0.241	5.0584e-10	morphology
Tmem30a	1.08835e-10	0.256306	0.868	0.526	1.76345e-06	Other
Rpl17	1.52911e-26	0.255371	1	1	2.54368e-22	gene_expression
Nell1	1.42142e-11	0.254751	0.475	0.199	2.31493e-07	gene_expression
Rpl27-ps3	2.32303e-22	0.254602	0.397	0.086	3.85879e-18	Other
Scoc	3.63876e-11	0.254601	0.934	0.611	5.91081e-07	gene_expression
Rps15a	7.34151e-17	0.254335	1	0.978	1.21392e-12	gene_expression
Camta1	2.29615e-12	0.254322	0.984	0.723	3.75489e-08	gene_expression
A230057D06Rik	2.73732e-15	0.254111	0.607	0.237	4.51356e-11	Other
Nap1l1	4.48602e-10	0.253146	0.907	0.549	7.23281e-06	gene_expression
Zfp462	8.16241e-14	0.252816	0.805	0.394	1.34117e-09	Other
Eif3e	1.00888e-12	0.25061	0.84	0.429	1.65213e-08	gene_expression
Galnt14	3.87852e-21	0.250545	0.432	0.104	6.4399e-17	gene_expression
Nectin3	5.15748e-18	0.249811	0.3	0.062	8.53769e-14	Other
Arpc5	3.71697e-16	0.246761	0.767	0.323	6.13858e-12	gene_expression
Slitrk6	3.50103e-20	0.246399	0.214	0.02	5.8075e-16	morphology
Ptpn5	5.77976e-10	0.246217	0.735	0.381	9.30715e-06	Other
Zfp292	3.147e-16	0.245585	0.553	0.197	5.19758e-12	Other
Synj1	1.41186e-08	0.245243	0.949	0.71	0.00022368	gene_expression
Rpl21	8.24006e-24	0.244988	1	1	1.36942e-19	gene_expression
Rps25	4.21767e-20	0.244252	1	0.995	6.99543e-16	gene_expression
Stk19	2.48346e-13	0.243394	0.584	0.243	4.07511e-09	Other
Trappc6b	3.17268e-11	0.242943	0.837	0.438	5.15561e-07	gene_expression
Zfp157	1.39882e-14	0.2424	0.502	0.184	2.30315e-10	Other
Clmp	1.70565e-17	0.242336	0.502	0.161	2.82268e-13	Other
Pdyn	4.62237e-13	0.242037	0.253	0.064	7.57837e-09	synapse_excitability
Nedd4	1.48585e-09	0.241353	0.965	0.675	2.38569e-05	gene_expression
St8sia3	6.45832e-15	0.240973	0.732	0.307	1.06394e-10	gene_expression
Tspan7	2.00234e-10	0.240909	0.992	0.863	3.23758e-06	Other
Dnaja1	5.06724e-10	0.239605	0.922	0.544	8.16433e-06	gene_expression
Klhl7	5.27845e-14	0.239466	0.642	0.261	8.6783e-10	gene_expression
Polr1d	9.49033e-11	0.239007	0.825	0.456	1.5381e-06	Other
Rps27a	5.81116e-21	0.238935	1	0.998	9.64711e-17	gene_expression
Mettl9	1.32581e-12	0.23862	0.63	0.277	2.17035e-08	Other
Gfra1	6.92818e-14	0.238088	0.506	0.192	1.13865e-09	morphology
Rpl9	4.97341e-24	0.237774	1	0.998	8.2668e-20	gene_expression
Lrrtm2	8.94485e-16	0.237674	0.506	0.175	1.4759e-11	Other
Rngtt	1.22725e-18	0.237523	0.405	0.106	2.03281e-14	gene_expression
Rprm	3.97757e-09	0.235914	0.233	0.078	6.35417e-05	Other
Bcl11a	1.58479e-11	0.232298	0.576	0.259	2.58036e-07	Esr1-TF
Rap1gap	2.34015e-09	0.232289	0.759	0.42	3.74939e-05	gene_expression
Rplp2	6.88711e-16	0.231889	1	0.985	1.13658e-11	gene_expression
AW551984	4.0814e-10	0.231275	0.887	0.52	6.58329e-06	Other
Kif5b	1.85646e-09	0.230952	0.911	0.558	2.97739e-05	Other
Rps2	6.05161e-15	0.22962	1	0.962	9.97002e-11	gene_expression
Mfsd6	1.96904e-11	0.229052	0.58	0.265	3.20343e-07	Other
Dynlt3	2.24189e-17	0.22793	0.498	0.159	3.70943e-13	Other
Bclaf1	2.6279e-09	0.227558	0.805	0.469	4.20674e-05	Other
Swi5	2.04574e-09	0.227383	0.895	0.558	3.27912e-05	gene_expression
Gabra3	2.11122e-10	0.227071	0.7	0.339	3.41342e-06	synapse_excitability
Araf	2.54805e-10	0.226205	0.977	0.726	4.11638e-06	gene_expression
Cers4	5.1265e-10	0.226067	0.817	0.469	8.25931e-06	Other
Dlx2	3.52197e-19	0.226058	0.553	0.173	5.83697e-15	morphology
Cnbp	4.65171e-12	0.224682	0.782	0.392	7.5995e-08	Other
Hsp90ab1	3.43306e-10	0.223373	1	0.916	5.54027e-06	gene_expression
Ddc	1.72927e-12	0.223264	0.323	0.102	2.82943e-08	Other
Negr1	4.04741e-08	0.222799	0.981	0.77	0.000634918	Other
Txndc17	7.22677e-13	0.222716	0.724	0.334	1.18403e-08	Other
Naa50	3.98894e-16	0.222001	0.661	0.252	6.58694e-12	Other
Cdh13	1.66514e-12	0.221785	0.498	0.204	2.72467e-08	gene_expression
Npy1r	2.59756e-15	0.221719	0.311	0.078	4.28337e-11	synapse_excitability
Gm47283	4.93748e-13	0.221716	0.595	0.245	8.094e-09	Other
Vma21	3.93637e-12	0.219981	0.58	0.252	6.43203e-08	gene_expression
Arsb	4.46667e-17	0.219669	0.521	0.172	7.38832e-13	gene_expression
Commd8	1.97675e-17	0.219362	0.479	0.146	3.27112e-13	Other
St3gal1	9.51025e-17	0.219349	0.261	0.049	1.57224e-12	gene_expression
Cacybp	1.06313e-16	0.219254	0.634	0.234	1.75735e-12	Other
Serpini1	3.42391e-13	0.219203	0.576	0.241	5.61659e-09	morphology
Mtpn	1.59314e-10	0.218323	0.93	0.617	2.57706e-06	gene_expression
Ptprk	2.92374e-12	0.218304	0.545	0.228	4.77973e-08	Other
Smc5	1.33728e-16	0.218253	0.455	0.142	2.21013e-12	Other
Rplp1	1.09109e-13	0.218164	1	0.996	1.79211e-09	gene_expression
Phactr1	1.0839e-13	0.218112	0.63	0.265	1.78041e-09	Other
Rtraf	4.57223e-10	0.218059	0.899	0.511	7.37134e-06	Other
Gdi2	3.06867e-11	0.217624	0.821	0.414	4.9875e-07	gene_expression
Mmd	7.81615e-09	0.21735	0.735	0.401	0.000124394	morphology
Zcchc18	1.89242e-08	0.216667	0.973	0.766	0.000298908	Other
Plekhb1	1.43425e-10	0.216417	0.498	0.221	2.32105e-06	Other
Bub3	2.60033e-10	0.215565	0.747	0.385	4.20057e-06	gene_expression
Marcksl1	3.80344e-08	0.215218	0.93	0.651	0.000596987	Other
Fam8a1	8.07655e-12	0.214852	0.704	0.338	1.31761e-07	Other
Mfn2	6.24102e-13	0.214671	0.607	0.257	1.02278e-08	Other
Rit2	1.19802e-11	0.21447	0.778	0.385	1.95254e-07	gene_expression
Crtac1	8.20663e-16	0.213859	0.276	0.06	1.35418e-11	Other
Vps35	6.39503e-13	0.213593	0.634	0.268	1.04795e-08	gene_expression
Zcchc12	1.06149e-09	0.211121	0.992	0.823	1.70592e-05	Other
Rprd1a	5.27292e-13	0.210784	0.615	0.257	8.64179e-09	Other
Rps6ka6	5.01403e-15	0.210498	0.268	0.06	8.26212e-11	gene_expression
Rps7	1.17774e-14	0.209509	1	0.991	1.93939e-10	gene_expression
Lnpk	5.93415e-14	0.209409	0.626	0.25	9.75455e-10	Other
Sfr1	4.22226e-13	0.208845	0.634	0.27	6.92366e-09	Other
Sdhaf4	2.60719e-18	0.208149	0.451	0.126	4.31699e-14	Other
Cct8	3.61557e-14	0.208061	0.619	0.248	5.94797e-10	gene_expression
B230334C09Rik	5.8828e-16	0.208022	0.514	0.175	9.70897e-12	Other
Plxnc1	1.79382e-12	0.206693	0.693	0.307	2.93469e-08	morphology
Mblac2	1.22731e-13	0.20651	0.611	0.246	2.01561e-09	Other
Eif5	1.80551e-08	0.205352	0.907	0.588	0.000285361	gene_expression
Dlgap1	7.63018e-12	0.205206	0.529	0.223	1.24509e-07	synapse_excitability
Ap1s2	2.53736e-09	0.205036	0.65	0.33	4.06231e-05	gene_expression
Nr3c1	4.97086e-08	0.204052	0.661	0.332	0.000778039	gene_expression
Ormdl1	2.35505e-15	0.203549	0.261	0.055	3.88395e-11	gene_expression
Chst11	3.48696e-15	0.203364	0.374	0.109	5.74825e-11	gene_expression
Rack1	1.15344e-07	0.203097	0.899	0.557	0.0017928	gene_expression
Dgkd	3.21714e-14	0.203035	0.416	0.137	5.29315e-10	Other
Irs2	3.91168e-15	0.202895	0.502	0.175	6.44762e-11	gene_expression
Snx16	4.76057e-15	0.202663	0.502	0.173	7.84495e-11	gene_expression
Rpsa	2.27665e-10	0.202574	1	0.953	3.67906e-06	gene_expression
Paip2	1.36362e-09	0.202516	0.833	0.46	2.18983e-05	gene_expression
Zfp622	3.51842e-14	0.200601	0.63	0.248	5.78851e-10	Other
H2-Q2	2.11218e-10	0.200325	0.253	0.078	3.41476e-06	Other
Glra3	6.37056e-12	0.199937	0.288	0.086	1.04012e-07	synapse_excitability
Pdha1	1.69117e-13	0.199936	0.545	0.212	2.77639e-09	gene_expression
Opn3	3.0699e-20	0.199322	0.175	0.007	5.09297e-16	Other
Slitrk5	1.379e-13	0.199202	0.525	0.199	2.26459e-09	morphology
Hspe1	1.40787e-08	0.19819	0.949	0.661	0.000223077	gene_expression
Syne2	6.1107e-18	0.19806	0.323	0.071	1.0115e-13	gene_expression
Fhad1	7.80775e-14	0.198029	0.471	0.168	1.28297e-09	Other
Tmem29	2.79405e-13	0.197994	0.56	0.219	4.5842e-09	Other
Rab9b	3.927e-11	0.197935	0.747	0.358	6.37824e-07	Other
Mgat5	3.80985e-12	0.197434	0.58	0.241	6.22568e-08	gene_expression
Pds5b	1.05293e-11	0.196651	0.732	0.336	1.7168e-07	Other
Emc2	1.07944e-16	0.196615	0.311	0.071	1.78421e-12	Other
Tcf4	1.39199e-08	0.19637	0.564	0.283	0.000220589	Esr1-TF
Hmgcs1	3.16335e-08	0.196297	0.751	0.418	0.000497373	Other
Galnt13	5.05839e-16	0.195878	0.467	0.15	8.34937e-12	gene_expression
Gmps	1.16609e-09	0.195561	0.825	0.422	1.87355e-05	Other
Snrpd1	6.73056e-14	0.195376	0.545	0.204	1.10623e-09	gene_expression
Stxbp5l	3.58303e-17	0.194765	0.459	0.137	5.92777e-13	Other
B230209E15Rik	6.62102e-08	0.193541	0.875	0.549	0.0010344	Other
Hprt	9.02839e-10	0.193143	0.782	0.381	1.45167e-05	Other
Rps17	5.13352e-11	0.193028	0.996	0.964	8.3317e-07	gene_expression
Fam92a	1.95903e-11	0.192795	0.475	0.192	3.18734e-07	Other
Fbxo11	1.30772e-11	0.19237	0.626	0.283	2.13054e-07	gene_expression
Plxna2	4.48832e-11	0.192349	0.704	0.334	7.28633e-07	morphology
Mcfd2	2.5597e-11	0.192315	0.584	0.255	4.16155e-07	Other
Rps6kb1	1.6054e-13	0.191993	0.553	0.214	2.63591e-09	gene_expression
Cnot7	3.15692e-11	0.191881	0.63	0.285	5.13032e-07	gene_expression
Tspyl4	8.7531e-07	0.191735	0.949	0.728	0.0132758	Other
Pcnp	2.05528e-08	0.190581	0.961	0.661	0.000324446	Other
Rpl7a	3.51379e-08	0.190168	0.992	0.872	0.000551982	gene_expression
Gosr2	3.29734e-12	0.189936	0.479	0.184	5.38984e-08	gene_expression
Gm16485	2.12914e-21	0.189678	0.272	0.036	3.53544e-17	Other
Ank3	1.87718e-07	0.189455	0.942	0.693	0.00290268	morphology
Rpl23a	1.4652e-12	0.189431	1	0.993	2.39795e-08	gene_expression
Lrif1	5.0953e-13	0.189418	0.447	0.161	8.35221e-09	Other
Ube2e1	4.00706e-11	0.189186	0.693	0.312	6.50747e-07	gene_expression
Tmod2	1.00871e-07	0.188861	0.914	0.58	0.00157006	morphology
Gabre	3.20235e-10	0.18885	0.603	0.286	5.16923e-06	synapse_excitability
Cdkl2	9.00933e-14	0.188785	0.626	0.259	1.48014e-09	Other
Rpl26	4.38422e-16	0.188344	1	1	7.23748e-12	gene_expression
Ak4	1.08477e-15	0.187706	0.432	0.133	1.78955e-11	gene_expression
Pcdh20	8.52337e-13	0.187533	0.405	0.142	1.39621e-08	Other
Cops2	8.84905e-13	0.187092	0.584	0.235	1.44939e-08	morphology
Ccdc85a	2.1975e-13	0.18658	0.37	0.119	3.60631e-09	Other
Cacul1	1.75869e-12	0.186047	0.572	0.234	2.87739e-08	gene_expression
Kpnb1	1.58625e-10	0.185783	0.72	0.338	2.56608e-06	Other
Mal2	6.3419e-12	0.185585	0.514	0.208	1.03551e-07	Other
Saraf	1.36489e-07	0.185076	0.899	0.62	0.00211763	Other
Eif1a	9.67965e-12	0.184431	0.521	0.212	1.57846e-07	Other
Med28	2.11874e-08	0.1844	0.887	0.511	0.000334274	Other
Alg10b	1.16385e-12	0.184356	0.424	0.151	1.90558e-08	gene_expression
Sucla2	8.76562e-13	0.184346	0.599	0.243	1.43581e-08	Other
H3f3b	8.86048e-09	0.184227	0.984	0.79	0.000140917	Other
Nbea	1.05483e-08	0.184162	0.829	0.443	0.000167527	gene_expression
2610301B20Rik	1.93786e-15	0.184107	0.51	0.172	3.19612e-11	Other
Hs2st1	1.30685e-11	0.183966	0.533	0.219	2.12925e-07	gene_expression
Ccar1	2.42703e-12	0.182647	0.564	0.224	3.96843e-08	Other
Ralgapa1	5.96248e-10	0.182483	0.545	0.246	9.59959e-06	Other
Rbms3	3.38187e-11	0.181325	0.475	0.195	5.49486e-07	Other
Wdr7	9.77807e-11	0.181302	0.603	0.268	1.58454e-06	Other
Tmem106b	1.54316e-08	0.18085	0.72	0.37	0.000244298	morphology
A730046J19Rik	1.09832e-11	0.180602	0.113	0.009	1.7907e-07	Other
Zfp120	6.21377e-18	0.180595	0.268	0.047	1.0285e-13	Other
Il1rapl2	1.71037e-16	0.180495	0.163	0.013	2.82621e-12	morphology
Tmem184c	4.1744e-14	0.180486	0.319	0.088	6.86479e-10	Other
Nrp1	8.87588e-11	0.180416	0.358	0.131	1.43878e-06	morphology
Rpl19	7.56567e-14	0.179992	1	0.995	1.24327e-09	gene_expression
Vcpip1	2.42832e-13	0.179924	0.455	0.161	3.98487e-09	Other
Eef1g	1.78513e-09	0.179526	1	0.958	2.86371e-05	gene_expression
Itm2c	1.28753e-09	0.179202	0.996	0.954	2.06803e-05	gene_expression
Tmx2	2.35262e-08	0.178904	0.833	0.473	0.000370797	Other
Reep5	4.04541e-08	0.178873	0.973	0.703	0.000634644	Other
Hnrnpa2b1	1.80494e-07	0.178848	0.953	0.682	0.00279206	gene_expression
Kl	2.94387e-09	0.177293	0.241	0.078	4.71048e-05	Other
Rcn1	9.55307e-13	0.176334	0.432	0.153	1.5646e-08	gene_expression
Vdac2	1.41046e-11	0.17622	0.693	0.301	2.29722e-07	Other
Gprasp1	2.17098e-07	0.175777	0.988	0.808	0.00335199	gene_expression
Rassf8	4.55649e-11	0.175691	0.467	0.186	7.39654e-07	Other
Cdkl5	4.25817e-12	0.175347	0.541	0.217	6.95743e-08	morphology
Mrap2	1.52545e-08	0.17513	0.401	0.181	0.000241524	Other
Dcaf12l1	1.2014e-10	0.174909	0.7	0.323	1.94543e-06	Other
Mbd5	1.82599e-16	0.1749	0.455	0.139	3.01708e-12	morphology
Rasd1	3.39487e-12	0.174866	0.148	0.02	5.54858e-08	Other
Arl5a	1.17771e-12	0.173932	0.634	0.263	1.92815e-08	Other
Tspan2	1.44024e-14	0.17375	0.514	0.182	2.37107e-10	Other
Peg3	1.21058e-11	0.173728	1	0.991	1.97288e-07	Other
Psd3	8.80253e-10	0.173716	0.634	0.299	1.41545e-05	Other
Pitpnm3	3.78604e-16	0.173339	0.381	0.106	6.25227e-12	Other
Adarb2	5.46786e-14	0.172843	0.549	0.201	8.98916e-10	Other
Rpl35a	1.43066e-13	0.17245	1	0.998	2.34929e-09	gene_expression
Sv2c	2.74468e-08	0.171274	0.521	0.257	0.000432041	Other
Tnxb	2.09432e-16	0.171256	0.179	0.018	3.46002e-12	Other
Gm10036	3.23523e-18	0.171001	0.195	0.018	5.35625e-14	Other
Acvr2a	4.35379e-14	0.170976	0.342	0.097	7.15936e-10	Other
Rps8	6.67746e-15	0.170695	1	1	1.09998e-10	gene_expression
Znrf2	2.41629e-15	0.170419	0.304	0.073	3.9847e-11	Other
BC005561	3.56229e-12	0.170339	0.599	0.248	5.8215e-08	Other
Rpl31	3.30136e-10	0.169761	1	0.991	5.32807e-06	gene_expression
Sox5	1.09747e-12	0.169677	0.327	0.099	1.7971e-08	Esr1-TF
Rps13	1.19934e-08	0.169657	1	0.98	0.000190299	gene_expression
Pcmtd1	2.96342e-10	0.169478	0.611	0.281	4.78474e-06	Other
Nrcam	1.2896e-12	0.168726	0.486	0.182	2.11121e-08	morphology
Efnb3	5.25903e-08	0.168435	0.79	0.445	0.000822933	morphology
Bmi1	5.19353e-13	0.168368	0.401	0.135	8.51271e-09	Other
A730017C20Rik	2.23293e-06	0.168202	0.895	0.62	0.0334068	Other
Necap1	5.95799e-08	0.167754	0.879	0.507	0.000931353	Other
Krr1	6.90556e-15	0.167571	0.37	0.106	1.13748e-10	gene_expression
Ikzf2	3.75241e-14	0.166982	0.245	0.053	6.17272e-10	Other
Igip	2.02565e-08	0.166919	0.755	0.389	0.00031983	Other
Epm2aip1	9.57207e-07	0.166719	0.86	0.538	0.0145017	gene_expression
Kdm5a	2.10859e-12	0.166506	0.498	0.192	3.44882e-08	gene_expression
Twistnb	4.7839e-12	0.166454	0.397	0.141	7.81498e-08	Other
Abce1	2.83196e-12	0.166441	0.447	0.162	4.62997e-08	gene_expression
Pgrmc2	4.98149e-11	0.166366	0.673	0.303	8.08545e-07	Other
Zyg11b	9.66642e-10	0.166313	0.704	0.336	1.55417e-05	gene_expression
Susd4	3.50358e-07	0.166233	0.572	0.299	0.00538115	Other
Pds5a	4.50078e-14	0.166063	0.389	0.12	7.40064e-10	Other
Luc7l2	1.00473e-06	0.166012	0.934	0.644	0.0152136	gene_expression
Tnpo3	5.30566e-12	0.165786	0.564	0.23	8.66679e-08	Other
Gm42851	3.37953e-13	0.165616	0.381	0.122	5.54411e-09	Other
Ncl	1.81097e-08	0.165258	0.86	0.491	0.000286206	gene_expression
Ggnbp2	1.90163e-07	0.165012	0.763	0.423	0.00294011	Other
Arhgap24	8.36946e-12	0.164806	0.327	0.106	1.36531e-07	Other
Abi2	3.28009e-09	0.164555	0.813	0.42	5.24486e-05	Other
Med21	1.76261e-11	0.164522	0.393	0.142	2.86829e-07	Other
Sec22a	9.88502e-15	0.164469	0.257	0.055	1.62787e-10	Other
Dhx9	8.84904e-12	0.164258	0.475	0.186	1.44345e-07	gene_expression
Spag9	1.32805e-06	0.164181	0.86	0.546	0.020031	Other
Nsg2	1.51807e-07	0.163682	0.988	0.861	0.00235271	synapse_excitability
6330403K07Rik	1.26265e-08	0.163675	1	0.978	0.000200257	Other
Pclo	7.83668e-07	0.163654	0.883	0.568	0.0119031	Other
2610044O15Rik8	4.65604e-17	0.162988	0.226	0.033	7.6997e-13	Other
Uba3	1.11074e-13	0.162981	0.436	0.148	1.82429e-09	gene_expression
Arid4a	1.19286e-08	0.1623	0.778	0.416	0.000189283	Other
Rps6ka3	3.30152e-12	0.161879	0.23	0.055	5.39634e-08	gene_expression
Gadd45a	1.46849e-13	0.161665	0.179	0.027	2.41127e-09	Other
Mrpl32	3.68554e-15	0.161415	0.475	0.155	6.07524e-11	gene_expression
Fsd1l	7.17327e-13	0.161269	0.537	0.206	1.17534e-08	Other
Cnrip1	1.13906e-08	0.160994	0.763	0.394	0.000180804	Other
Ube2d2a	2.87938e-07	0.160894	0.856	0.493	0.0044305	Other
Zfp280d	3.01753e-14	0.160889	0.494	0.172	4.96564e-10	Esr1-TF
Trim44	4.41244e-08	0.160745	0.864	0.478	0.000691253	gene_expression
Nlgn1	4.475e-10	0.160247	0.471	0.201	7.21549e-06	synapse_excitability
Fgfr1op2	3.28715e-08	0.160228	0.661	0.339	0.000516609	Other
Mttp	2.26698e-12	0.160099	0.58	0.234	3.70741e-08	Other
Ube2r2	2.36981e-07	0.160077	0.778	0.427	0.00365425	Other
Pnmal1	2.5789e-07	0.159756	0.895	0.513	0.00397332	Other
Jam3	8.90146e-12	0.159554	0.475	0.181	1.45192e-07	Other
Btbd11	5.83793e-12	0.159461	0.502	0.195	9.53451e-08	gene_expression
Trove2	2.1302e-11	0.158966	0.556	0.234	3.46434e-07	Other
Hspd1	7.54325e-09	0.158453	0.681	0.336	0.000120081	gene_expression
Gtf2a2	5.41524e-11	0.158186	0.537	0.221	8.78786e-07	Other
Lin7c	4.64823e-10	0.157957	0.58	0.257	7.49295e-06	Other
Fgf12	1.43574e-12	0.15785	0.432	0.153	2.34987e-08	morphology
Spata7	1.60977e-11	0.15751	0.72	0.312	2.62086e-07	Other
Dars	4.93676e-13	0.15751	0.319	0.093	8.09332e-09	gene_expression
Rybp	9.71932e-11	0.157472	0.572	0.245	1.57511e-06	Other
Adgrb3	7.28275e-08	0.157021	0.739	0.396	0.00113662	Other
Cadps	1.64848e-07	0.156342	0.833	0.462	0.0025525	Other
Pts	3.09916e-14	0.156195	0.335	0.093	5.09935e-10	morphology
Rab39b	2.44889e-12	0.156106	0.354	0.115	4.00393e-08	gene_expression
Sorcs3	1.28952e-08	0.155993	0.506	0.235	0.000204466	Other
Rps3	3.41585e-11	0.155993	1	0.996	5.54973e-07	gene_expression
Lpp	1.49674e-14	0.155833	0.315	0.082	2.46393e-10	gene_expression
Pip4k2a	8.81556e-09	0.1557	0.23	0.077	0.000140212	Other
Hmgcr	8.94853e-09	0.155669	0.568	0.272	0.000142291	Other
Dopey1	7.39925e-13	0.15558	0.502	0.188	1.21222e-08	gene_expression
Ttpal	7.99155e-15	0.155353	0.307	0.077	1.31621e-10	Other
Eif1	1.31601e-09	0.155315	1	0.989	2.11364e-05	gene_expression
Taf15	1.19086e-11	0.155261	0.506	0.199	1.94099e-07	Other
Arfgef1	2.58452e-09	0.154308	0.494	0.217	4.13756e-05	gene_expression
Cobl	4.14909e-15	0.15415	0.307	0.077	6.83854e-11	Other
mt-Co1	5.70664e-16	0.153366	1	1	9.41881e-12	Other
Eloc	6.80211e-11	0.153359	0.693	0.316	1.1033e-06	gene_expression
Trnt1	6.94501e-13	0.153314	0.358	0.113	1.13801e-08	Other
Eny2	2.69426e-09	0.153155	0.65	0.312	4.31271e-05	Other
Kcnk2	2.31992e-06	0.153095	0.755	0.422	0.0346922	Other
Gm10073	1.3714e-11	0.153026	0.249	0.068	2.23374e-07	Other
Tub	7.61575e-07	0.153001	0.883	0.515	0.0115752	Other
Jmjd1c	1.35471e-10	0.152796	0.591	0.254	2.19301e-06	Other
Ptprm	1.12946e-11	0.152736	0.245	0.066	1.84125e-07	gene_expression
Slitrk4	1.61973e-10	0.152491	0.292	0.095	2.61991e-06	morphology
Rnf7	1.68982e-06	0.152304	0.805	0.464	0.0253913	gene_expression
Nap1l2	1.69209e-11	0.152269	0.44	0.164	2.7537e-07	Other
Hap1	1.4195e-07	0.151998	1	0.964	0.00220164	Other
Frmd4a	3.11411e-09	0.151993	0.564	0.257	4.98102e-05	Other
Ankrd12	4.10564e-07	0.151206	0.848	0.509	0.00629066	Other
Dstn	1.31173e-08	0.15119	0.817	0.427	0.000207949	Other
Tab2	1.93917e-10	0.151136	0.432	0.173	3.13583e-06	Other
Pcm1	9.02097e-11	0.15009	0.665	0.294	1.46212e-06	Other
Pbrm1	2.65681e-08	0.149909	0.817	0.427	0.000418288	Other
Papola	1.38512e-07	0.149692	0.724	0.38	0.00214874	gene_expression
Nxn	8.08333e-11	0.149682	0.187	0.042	1.31087e-06	gene_expression
Sumo2	5.07239e-07	0.149609	0.969	0.745	0.00775112	gene_expression
Oxct1	4.10355e-10	0.148893	0.611	0.277	6.61821e-06	Other
Zfp365	1.41067e-12	0.148723	0.572	0.226	2.30898e-08	Other
Btbd1	1.30122e-10	0.14861	0.541	0.23	2.10667e-06	gene_expression
Morn2	4.71252e-10	0.147999	0.518	0.223	7.59612e-06	Other
Ctnnb1	1.73835e-06	0.147999	0.751	0.436	0.0261118	morphology
Nudcd2	1.11708e-12	0.147954	0.362	0.115	1.8291e-08	Other
Arhgap5	2.42166e-09	0.147782	0.591	0.274	3.87804e-05	Other
Ilf2	2.15808e-13	0.147447	0.56	0.212	3.54185e-09	gene_expression
Sgsm1	1.80384e-07	0.147328	0.848	0.447	0.00279054	Other
Trhr	6.88877e-12	0.147322	0.218	0.051	1.12432e-07	Other
Msmo1	2.63051e-10	0.147179	0.529	0.232	4.24906e-06	Other
Cabin1	9.63174e-14	0.147082	0.49	0.172	1.5823e-09	Other
Rev3l	1.39915e-10	0.147031	0.486	0.199	2.2648e-06	Other
Mut	2.12412e-11	0.146628	0.237	0.062	3.45467e-07	Other
Gpr83	5.44715e-07	0.146515	0.21	0.078	0.00831617	Other
Rps16	1.8872e-09	0.146496	1	0.996	3.0265e-05	gene_expression
Prpsap2	9.83521e-12	0.146327	0.296	0.089	1.60373e-07	Other
N4bp2l2	6.76149e-10	0.146275	0.595	0.266	1.08806e-05	Other
Dcp2	7.18253e-10	0.145939	0.518	0.221	1.1556e-05	gene_expression
Rpl8	4.64439e-08	0.145753	1	0.996	0.000727266	gene_expression
Ssb	2.63698e-08	0.145609	0.619	0.318	0.000415193	gene_expression
Cdv3	2.17823e-09	0.145342	0.708	0.349	3.49039e-05	Other
Rab40b	7.92903e-12	0.145336	0.202	0.044	1.29378e-07	gene_expression
Scn9a	1.89357e-09	0.14528	0.572	0.257	3.03653e-05	Other
Mtus1	6.31796e-11	0.145257	0.304	0.099	1.02496e-06	gene_expression
Snhg11	1.65532e-11	0.145188	1	1	2.69437e-07	Other
Slc7a1	2.17957e-10	0.144663	0.506	0.214	3.52328e-06	Other
Slc32a1	2.32273e-06	0.144555	0.782	0.46	0.0347319	synapse_excitability
Hapln4	2.14428e-11	0.144303	0.377	0.133	3.48703e-07	morphology
Psma3	2.2863e-06	0.144122	0.852	0.509	0.0341985	gene_expression
5730455P16Rik	1.09029e-10	0.144073	0.615	0.266	1.76649e-06	Other
Eid1	1.46439e-06	0.143592	0.953	0.672	0.0220508	Other
Fut9	5.80176e-10	0.143525	0.591	0.263	9.342e-06	gene_expression
Vps50	2.03565e-11	0.143336	0.514	0.197	3.31139e-07	Other
Esf1	1.36005e-11	0.143073	0.409	0.15	2.21551e-07	Other
Edil3	1.35079e-07	0.143027	0.638	0.336	0.00209588	Other
Dpp10	1.27151e-07	0.142985	0.63	0.338	0.00197427	Other
Cntnap4	5.6552e-10	0.142222	0.428	0.173	9.10769e-06	Other
Amd1	3.67208e-13	0.142056	0.245	0.057	6.02295e-09	Other
Esyt3	2.26893e-10	0.141268	0.249	0.075	3.66682e-06	Other
Rps15	1.66124e-07	0.140772	1	0.995	0.00257176	gene_expression
Ipo7	8.47555e-11	0.140751	0.506	0.208	1.37414e-06	Other
Fbxw11	1.70633e-09	0.140732	0.576	0.265	2.73798e-05	gene_expression
Tnik	1.80666e-06	0.140723	0.833	0.509	0.0271306	morphology
Il13ra1	7.94578e-12	0.140723	0.366	0.122	1.29635e-07	Other
Selenof	1.96196e-08	0.140618	0.685	0.336	0.000309832	Other
Slc18a2	3.03445e-09	0.140584	0.518	0.241	4.8542e-05	synapse_excitability
Tmsb4x	1.82528e-08	0.140521	1	0.998	0.000288413	gene_expression
Gm11361	3.26552e-15	0.140316	0.148	0.011	5.38387e-11	Other
Snx5	2.90599e-10	0.140001	0.389	0.15	4.69259e-06	Other
Smim26	1.64472e-07	0.13994	0.716	0.378	0.00254701	Other
Mpped1	6.784e-11	0.139705	0.241	0.068	1.10043e-06	Other
Trp53inp1	5.89322e-11	0.139479	0.21	0.051	9.56233e-07	Other
Matr3	1.55072e-06	0.13936	0.988	0.761	0.0233368	Other
Park2	8.26729e-10	0.139202	0.284	0.097	1.32963e-05	Other
Srp9	4.38162e-08	0.138967	0.786	0.416	0.000686513	gene_expression
Mrpl42	2.58881e-11	0.138714	0.529	0.214	4.20863e-07	gene_expression
Sptssa	7.10068e-10	0.13866	0.588	0.266	1.1425e-05	Other
Ttc21b	7.7722e-13	0.138481	0.276	0.073	1.27324e-08	Other
Rap1a	8.99145e-12	0.138381	0.346	0.113	1.46651e-07	gene_expression
Kmt2e	7.524e-08	0.138365	0.84	0.443	0.00117389	Other
Rps11	5.17104e-09	0.138278	1	0.998	8.25039e-05	gene_expression
H3f3a	7.2938e-07	0.138142	0.802	0.436	0.011091	gene_expression
Tomm22	3.00718e-09	0.137879	0.665	0.318	4.81119e-05	Other
Esd	2.34795e-07	0.137607	0.568	0.288	0.00362172	Other
Snrpe	1.64538e-08	0.137546	0.669	0.332	0.000260315	gene_expression
Zrsr1	2.08371e-09	0.137416	0.494	0.221	3.33936e-05	Other
Phf3	3.6336e-08	0.137056	0.681	0.343	0.00057062	Other
Cul2	1.62639e-11	0.136945	0.327	0.106	2.6476e-07	gene_expression
Grsf1	4.28012e-11	0.136928	0.529	0.212	6.94921e-07	gene_expression
D3Ertd751e	1.51748e-11	0.136882	0.3	0.091	2.47091e-07	Other
Hspa13	1.22613e-08	0.136571	0.665	0.319	0.000194489	gene_expression
Auh	3.19753e-08	0.136113	0.335	0.137	0.000502684	Other
Larp4b	2.43957e-06	0.136073	0.774	0.434	0.0364471	gene_expression
Mpp5	1.21507e-11	0.136003	0.385	0.135	1.98008e-07	Other
Cadm2	7.44838e-09	0.13562	0.634	0.305	0.000118578	Other
Pappa	1.10751e-10	0.135194	0.105	0.009	1.79416e-06	gene_expression
Eif2a	5.98598e-12	0.13455	0.447	0.166	9.77511e-08	gene_expression
Gm15446	1.02845e-13	0.134523	0.152	0.016	1.68944e-09	Other
Rpl4	2.55594e-06	0.134497	1	0.969	0.0381577	gene_expression
Uri1	7.95185e-10	0.134474	0.529	0.224	1.27898e-05	Other
Cspg5	1.03937e-06	0.134349	0.778	0.447	0.0157278	morphology
Cdr2	9.3726e-12	0.134307	0.218	0.051	1.52858e-07	Other
Mpv17l	6.40876e-11	0.134156	0.436	0.166	1.03963e-06	Other
2810474O19Rik	7.23392e-12	0.134113	0.362	0.12	1.18058e-07	Other
Zfp638	6.89772e-09	0.134101	0.568	0.261	0.000109888	Other
Naa15	7.24436e-09	0.133635	0.623	0.292	0.000115367	gene_expression
Pcf11	4.00373e-10	0.133604	0.335	0.119	6.45921e-06	gene_expression
Tmem178b	9.9544e-11	0.133484	0.529	0.221	1.61301e-06	Other
Rbmxl1	2.17832e-12	0.133429	0.311	0.091	3.56264e-08	Other
Srp72	6.28751e-09	0.133141	0.72	0.345	0.00010021	gene_expression
Npepps	2.07046e-06	0.132785	0.829	0.484	0.0310197	Other
Gabrg1	1.70074e-08	0.132534	0.549	0.268	0.000269006	synapse_excitability
Actr10	4.99551e-08	0.132486	0.603	0.294	0.000781797	Other
Mafa	2.45519e-08	0.132412	0.109	0.018	0.000386766	Other
Zfp811	3.87156e-14	0.132346	0.237	0.049	6.36756e-10	Other
Mllt10	2.45803e-10	0.132336	0.502	0.204	3.97168e-06	Other
Tmem50b	1.01629e-07	0.13225	0.556	0.276	0.00158165	gene_expression
Dcun1d5	4.12543e-11	0.132146	0.572	0.234	6.69887e-07	Other
Mfap3l	4.05144e-11	0.131995	0.183	0.038	6.57914e-07	Other
Rragd	2.15542e-11	0.131831	0.331	0.108	3.50492e-07	Other
Mindy2	1.16254e-08	0.131719	0.568	0.268	0.000184495	Other
Sbds	5.4013e-12	0.131353	0.377	0.128	8.82194e-08	gene_expression
Lhfpl3	2.04074e-09	0.130923	0.268	0.091	3.2713e-05	Other
Dhx40	7.933e-12	0.130912	0.261	0.071	1.29435e-07	gene_expression
Ctxn3	2.25967e-07	0.130802	0.195	0.066	0.00348713	Other
Gtpbp4	1.72055e-10	0.13053	0.529	0.224	2.78264e-06	gene_expression
Fam45a	5.21028e-13	0.130494	0.331	0.097	8.53966e-09	Other
Maoa	1.25158e-10	0.130346	0.389	0.146	2.02644e-06	Other
Atraid	2.18797e-11	0.129884	0.479	0.186	3.55764e-07	gene_expression
B4gat1	6.12758e-09	0.129629	0.389	0.161	9.76798e-05	gene_expression
Grik1	5.662e-09	0.129282	0.366	0.151	9.03089e-05	synapse_excitability
Poglut1	3.48172e-11	0.12925	0.486	0.188	5.65641e-07	Other
Fgd4	1.25138e-11	0.129091	0.432	0.159	2.039e-07	gene_expression
Cap2	2.06569e-07	0.129008	0.467	0.226	0.00319169	Other
Ptbp3	1.42543e-10	0.128906	0.253	0.075	2.30692e-06	Other
Zdhhc23	1.96493e-12	0.128425	0.187	0.035	3.21404e-08	Other
Zfp846	7.39052e-08	0.128151	0.591	0.292	0.00115336	Other
Wnt4	3.79843e-10	0.12778	0.152	0.029	6.12915e-06	gene_expression
Creb1	1.58585e-09	0.127445	0.346	0.13	2.5456e-05	gene_expression
Mga	1.04124e-07	0.127417	0.619	0.299	0.00161996	Other
Rps21	2.65951e-07	0.127298	1	0.998	0.00409591	gene_expression
Mzt1	2.56681e-07	0.127282	0.677	0.358	0.00395494	Other
Nmd3	9.71466e-13	0.127081	0.3	0.084	1.59097e-08	gene_expression
Becn1	3.78975e-09	0.126803	0.603	0.274	6.05527e-05	gene_expression
Creb3l1	6.66669e-12	0.126674	0.121	0.011	1.0882e-07	Esr1-TF
B3galt6	2.11049e-13	0.126377	0.284	0.073	3.46395e-09	gene_expression
Sh3bgrl	4.64655e-09	0.126373	0.389	0.159	7.41728e-05	Other
Anp32b	4.01367e-09	0.126308	0.537	0.245	6.41104e-05	gene_expression
Zfp322a	2.75036e-10	0.126135	0.479	0.197	4.44183e-06	Other
Slc39a6	8.5318e-11	0.126078	0.533	0.221	1.38318e-06	Other
Rchy1	1.22082e-08	0.126038	0.661	0.312	0.000193659	gene_expression
Socs4	4.45702e-11	0.125245	0.195	0.044	7.23597e-07	Other
Rpl27a	2.89977e-07	0.124892	1	0.998	0.004461	gene_expression
Sephs2	5.61301e-10	0.124843	0.432	0.173	9.04088e-06	Other
Ppa2	1.66146e-11	0.124687	0.288	0.086	2.7042e-07	gene_expression
Lhx5	1.36632e-11	0.124396	0.296	0.089	2.2256e-07	Other
Sntg1	8.45048e-10	0.123916	0.237	0.071	1.35892e-05	Other
BC030500	1.89275e-11	0.123914	0.374	0.13	3.07969e-07	Other
Timm9	1.03588e-06	0.123745	0.77	0.422	0.015677	Other
Nek7	1.28904e-08	0.123604	0.296	0.111	0.000204402	gene_expression
Fam76a	3.52117e-09	0.122948	0.553	0.246	5.62859e-05	Other
Myh10	1.68721e-08	0.122874	0.7	0.339	0.000266883	gene_expression
Cfap36	3.10794e-10	0.122747	0.525	0.224	5.01715e-06	Other
Ppp2r3a	6.76744e-12	0.12262	0.276	0.077	1.10458e-07	Other
Acsl3	4.38718e-09	0.122437	0.521	0.232	7.00501e-05	gene_expression
Cetn2	4.92484e-11	0.122255	0.471	0.184	7.994e-07	gene_expression
Pnpt1	5.32213e-11	0.122202	0.218	0.055	8.63729e-07	gene_expression
Strap	2.18467e-08	0.12207	0.646	0.308	0.000344501	gene_expression
Rnmt	1.32001e-10	0.122068	0.514	0.208	2.13696e-06	Other
Psmd9	6.32444e-10	0.122024	0.432	0.172	1.01804e-05	gene_expression
Dock3	1.71541e-08	0.12197	0.51	0.235	0.000271293	Other
Mex3b	2.04304e-13	0.121941	0.16	0.02	3.35345e-09	gene_expression
Lig4	1.1522e-10	0.121909	0.187	0.042	1.86622e-06	morphology
Atxn10	4.45637e-08	0.121707	0.588	0.285	0.000698091	gene_expression
Rps23	3.76265e-07	0.121592	1	0.996	0.00577492	gene_expression
Fundc1	2.07778e-08	0.121435	0.486	0.221	0.000327915	Other
Gpr22	9.40429e-12	0.121434	0.206	0.046	1.53365e-07	Other
Rab9	1.22766e-10	0.121355	0.276	0.086	1.98782e-06	Other
Fam161b	4.00907e-09	0.121335	0.226	0.069	6.40409e-05	Other
Pls3	1.21538e-11	0.121252	0.385	0.133	1.98046e-07	Other
Pdk1	5.82518e-08	0.121033	0.428	0.195	0.000910825	gene_expression
Ppt1	1.81386e-09	0.120977	0.638	0.283	2.90925e-05	Other
Gm39244	1.12831e-09	0.120914	0.148	0.029	1.81297e-05	Other
Tmed7	1.60388e-09	0.12087	0.689	0.319	2.57439e-05	gene_expression
Puf60	7.75606e-08	0.120834	0.424	0.192	0.00120971	gene_expression
Snrpb2	1.46131e-11	0.120808	0.475	0.181	2.37975e-07	Other
Tcerg1l	1.62828e-09	0.120673	0.272	0.091	2.61339e-05	Other
Agps	2.8425e-10	0.120519	0.296	0.097	4.59035e-06	gene_expression
N6amt1	4.56728e-13	0.120481	0.358	0.109	7.48852e-09	gene_expression
Kcnq3	1.76712e-09	0.120259	0.455	0.19	2.83498e-05	synapse_excitability
Phyh	1.9734e-11	0.120139	0.261	0.073	3.21032e-07	Other
Nfkbia	1.5817e-08	0.1199	0.249	0.086	0.000250335	gene_expression
Dmtf1	1.16641e-10	0.119514	0.374	0.135	1.88912e-06	Other
Camk4	6.37646e-07	0.119138	0.311	0.139	0.00971134	Other
Gtf2a1	5.84548e-10	0.118973	0.436	0.173	9.4118e-06	Other
Atrx	2.97805e-06	0.118816	0.681	0.38	0.0443223	gene_expression
Zfp934	1.90811e-12	0.118759	0.136	0.015	3.12148e-08	Other
Tram1l1	1.40885e-08	0.118662	0.556	0.259	0.000223218	Other
Ncoa4	6.54285e-10	0.118616	0.436	0.173	1.05314e-05	gene_expression
Bend5	1.64926e-11	0.118513	0.233	0.058	2.68466e-07	Other
Krt222	1.47237e-10	0.118455	0.222	0.058	2.38229e-06	Other
Cnih1	3.68779e-08	0.11841	0.564	0.274	0.000579057	Other
Atxn7l1	1.91428e-09	0.118355	0.276	0.093	3.06936e-05	Other
AC101921.1	2.86759e-11	0.118278	0.121	0.013	4.66126e-07	Other
Gm9844	4.62901e-12	0.118064	0.222	0.051	7.56287e-08	Other
Tmem237	3.93458e-11	0.118049	0.412	0.15	6.39015e-07	Other
Smim20	1.44539e-08	0.118019	0.346	0.139	0.00022895	Other
Ccdc88a	2.71722e-06	0.118016	0.677	0.369	0.040511	Other
Hnrnpul2	1.46881e-08	0.117903	0.743	0.369	0.000232645	Other
Zfpm2	2.54155e-10	0.117705	0.179	0.04	4.10613e-06	Other
Amy1	5.59717e-10	0.117691	0.311	0.108	9.01592e-06	Other
Nono	6.89204e-08	0.117585	0.759	0.385	0.00107599	Other
Hpgds	6.04515e-10	0.117579	0.132	0.022	9.73208e-06	Other
Manea	3.83051e-08	0.11755	0.257	0.093	0.000601199	gene_expression
Mfap1a	5.58775e-10	0.117457	0.304	0.104	9.0013e-06	Other
Carf	1.45747e-07	0.117421	0.374	0.164	0.00225981	Other
Mast4	1.17893e-06	0.117353	0.634	0.341	0.0178089	Other
Nemf	5.0571e-10	0.117352	0.451	0.181	8.14851e-06	gene_expression
Chid1	4.79243e-10	0.117315	0.362	0.133	7.72348e-06	gene_expression
Polr3k	8.43502e-11	0.117284	0.424	0.161	1.36774e-06	Other
Ddx10	2.86009e-09	0.116992	0.191	0.051	4.57757e-05	gene_expression
Rps27l	4.31197e-08	0.116729	0.533	0.245	0.000675816	gene_expression
Usp4	2.29639e-10	0.116462	0.455	0.181	3.71074e-06	gene_expression
Tax1bp1	4.72339e-07	0.116397	0.409	0.192	0.00722301	Other
Fam222a	1.94673e-12	0.115956	0.218	0.047	3.18447e-08	Other
Trip11	2.57204e-08	0.11581	0.463	0.206	0.000405045	gene_expression
Sowaha	3.25044e-09	0.11542	0.171	0.042	5.19811e-05	Other
Sesn3	6.17736e-07	0.115089	0.794	0.436	0.00941492	Other
Zhx1	4.32096e-08	0.114844	0.37	0.155	0.000677182	Other
Bhlhb9	1.11917e-10	0.114812	0.405	0.151	1.81294e-06	morphology
Nudt21	2.81327e-09	0.114801	0.611	0.272	4.50292e-05	gene_expression
Cetn3	1.48889e-08	0.114705	0.728	0.35	0.000235796	Other
Cfap97	2.3457e-08	0.114704	0.455	0.203	0.000369729	Other
Cnot6l	1.14624e-10	0.11454	0.545	0.224	1.85668e-06	gene_expression
Myrip	2.49755e-10	0.114475	0.179	0.04	4.03529e-06	gene_expression
Senp2	5.91188e-09	0.114451	0.518	0.234	9.42531e-05	gene_expression
Gfod1	5.66943e-10	0.114285	0.272	0.088	9.13006e-06	Other
4833439L19Rik	1.72502e-08	0.114204	0.607	0.296	0.000272743	Other
Mesd	3.81319e-07	0.114166	0.603	0.308	0.00585133	Other
Iqcb1	5.22111e-09	0.113937	0.366	0.144	8.32923e-05	Other
Trappc2	7.75506e-09	0.113937	0.432	0.181	0.000123429	gene_expression
Cebpzos	6.51211e-09	0.113922	0.475	0.206	0.000103764	Other
Armcx5	5.36719e-12	0.113836	0.272	0.075	8.76676e-08	Other
Mcts1	1.68771e-11	0.113771	0.327	0.104	2.74675e-07	gene_expression
Spopl	1.43912e-10	0.11376	0.292	0.093	2.32878e-06	gene_expression
Vbp1	5.2189e-07	0.113283	0.786	0.407	0.00797187	gene_expression
Omg	3.15653e-08	0.113212	0.354	0.146	0.000496332	morphology
Phf20l1	2.49125e-07	0.113187	0.634	0.321	0.00383951	Other
Shisa2	1.17079e-10	0.113185	0.179	0.038	1.8961e-06	Other
Idnk	8.73739e-08	0.112968	0.467	0.214	0.00136164	Other
Cmpk2	6.01245e-11	0.11294	0.28	0.084	9.7552e-07	gene_expression
Ndufaf4	2.97243e-09	0.11287	0.467	0.199	4.75589e-05	Other
Spg20	3.23077e-10	0.112835	0.311	0.108	5.21479e-06	Other
Ostc	5.71858e-09	0.11275	0.51	0.221	9.11999e-05	Other
Fhl1	2.04239e-07	0.112498	0.638	0.323	0.0031561	gene_expression
Chac2	2.726e-10	0.112498	0.195	0.047	4.40276e-06	Other
Gm6710	1.12932e-11	0.112486	0.21	0.047	1.84114e-07	Other
Txlng	2.21199e-09	0.112415	0.292	0.102	3.54428e-05	Other
Usp48	3.53614e-09	0.11233	0.424	0.177	5.65217e-05	Other
Crk	2.67001e-08	0.112312	0.591	0.281	0.000420339	gene_expression
Atp6v1h	2.4252e-09	0.112133	0.553	0.243	3.88348e-05	gene_expression
Tyms	3.9283e-08	0.112089	0.144	0.035	0.000616351	gene_expression
Rsph4a	6.9772e-09	0.111955	0.136	0.027	0.000111147	gene_expression
Jtb	9.90987e-09	0.111918	0.521	0.235	0.000157418	Other
Hook2	4.75412e-10	0.111801	0.409	0.159	7.66269e-06	gene_expression
Nudt10	4.28083e-09	0.111454	0.424	0.177	6.83606e-05	Other
Cct4	6.51368e-08	0.111441	0.564	0.268	0.0010177	gene_expression
Kif3a	3.91941e-07	0.111411	0.759	0.416	0.00600963	morphology
3110043O21Rik	5.81434e-09	0.111241	0.323	0.122	9.27039e-05	Other
Tspan6	1.18925e-08	0.111236	0.381	0.157	0.000188721	Other
Flrt2	3.74053e-08	0.110951	0.323	0.13	0.000587225	gene_expression
Sema3a	8.65472e-09	0.110837	0.206	0.062	0.000137688	morphology
Abcc1	6.28915e-10	0.110767	0.179	0.042	1.01243e-05	Other
Syt6	2.61683e-06	0.110742	0.23	0.095	0.0390431	gene_expression
Abraxas2	3.13585e-08	0.110742	0.42	0.184	0.000493144	Other
Rnf165	7.36012e-09	0.110677	0.467	0.201	0.000117188	Other
Cntn6	5.58177e-10	0.11063	0.16	0.033	8.99223e-06	morphology
Rnf6	8.7591e-08	0.110582	0.475	0.219	0.00136493	morphology
Sltm	7.67815e-07	0.110566	0.677	0.358	0.0116669	Other
Ermp1	3.74418e-09	0.110437	0.23	0.071	5.98358e-05	Other
Zfp92	3.09983e-10	0.110396	0.385	0.142	5.00436e-06	Other
Zfp329	2.3612e-09	0.109997	0.564	0.252	3.78217e-05	Other
Enc1	1.74199e-07	0.109855	0.72	0.372	0.00269591	morphology
Erich3	6.44883e-08	0.109757	0.35	0.146	0.00100769	Other
Ahcyl1	4.93724e-07	0.109686	0.588	0.294	0.00754607	gene_expression
Fnbp1l	2.85898e-06	0.109422	0.611	0.341	0.0425787	Other
Arpc3	4.29093e-08	0.109418	0.603	0.277	0.000672646	gene_expression
Tmem170b	1.0864e-08	0.109182	0.35	0.139	0.000172499	Other
Rrm2b	1.68909e-09	0.108891	0.354	0.133	2.71048e-05	Other
Gtf2h5	8.06411e-07	0.108812	0.689	0.352	0.0122421	gene_expression
Ppp1r17	2.27146e-06	0.108773	0.265	0.113	0.0339788	Other
Cycs	3.32125e-06	0.108673	0.747	0.405	0.0493505	energy
Exosc9	6.09774e-11	0.108642	0.195	0.044	9.89297e-07	gene_expression
Csnk2a2	4.66667e-09	0.108625	0.518	0.223	7.44848e-05	Other
Dock11	9.0367e-08	0.108547	0.14	0.035	0.00140765	Other
Psma6	7.74679e-10	0.108523	0.311	0.108	1.24615e-05	gene_expression
Zfp266	3.40213e-09	0.108397	0.51	0.215	5.43898e-05	Other
Sdk2	1.65678e-08	0.108333	0.401	0.17	0.000262087	morphology
Npbwr1	1.51928e-09	0.108245	0.101	0.011	2.4392e-05	synapse_excitability
BC022687	2.91223e-10	0.107999	0.175	0.038	4.70238e-06	Other
Slc35e3	6.54766e-10	0.107995	0.424	0.166	1.05385e-05	Other
March8	1.17703e-07	0.1079	0.494	0.234	0.00182911	Other
Kit	1.29889e-06	0.107895	0.148	0.046	0.019595	gene_expression
Tmed10	1.53566e-06	0.107841	0.774	0.458	0.0231132	gene_expression
Srsf12	2.48562e-09	0.10779	0.393	0.157	3.97973e-05	Other
Dpysl3	3.2973e-08	0.107772	0.455	0.204	0.00051817	morphology
Spcs1	2.07454e-07	0.107449	0.654	0.323	0.00320516	gene_expression
AI987944	8.42083e-11	0.107422	0.163	0.031	1.36552e-06	Other
Akirin1	2.07105e-08	0.107346	0.533	0.239	0.000326873	Other
Nicn1	1.9733e-06	0.107288	0.696	0.367	0.0295837	Other
Specc1	4.75771e-10	0.107256	0.346	0.124	7.668e-06	Other
E130307A14Rik	1.93364e-10	0.107036	0.389	0.146	3.12708e-06	Other
Clvs2	4.17209e-10	0.106932	0.311	0.106	6.72791e-06	gene_expression
Mgat1	1.84534e-08	0.106887	0.409	0.173	0.000291546	gene_expression
Pigp	7.5954e-11	0.106345	0.292	0.091	1.23182e-06	Other
Pnrc2	1.79595e-09	0.106228	0.401	0.161	2.88089e-05	gene_expression
Daam1	1.82215e-08	0.105907	0.467	0.203	0.000287954	Other
Psmd10	8.09602e-09	0.10564	0.296	0.108	0.000128824	gene_expression
Vamp7	4.44989e-07	0.105526	0.358	0.157	0.00680966	gene_expression
Mmp16	1.73115e-09	0.105251	0.319	0.115	2.77762e-05	Other
Cand1	1.58626e-07	0.105241	0.591	0.29	0.00245759	Other
Aph1b	2.61092e-08	0.105101	0.249	0.088	0.000411142	gene_expression
Irak1bp1	1.80227e-09	0.105058	0.389	0.153	2.89084e-05	Other
Ufl1	4.39129e-09	0.105008	0.265	0.089	7.01113e-05	gene_expression
Diaph3	1.61998e-08	0.104787	0.148	0.035	0.000256346	Other
Rbm7	8.85362e-11	0.104732	0.374	0.133	1.43526e-06	Other
Sf3b6	1.14593e-11	0.104706	0.424	0.15	1.86798e-07	Other
Cmpk1	5.82793e-08	0.104675	0.634	0.303	0.000911197	gene_expression
Fam183b	2.07799e-11	0.104649	0.342	0.113	3.38006e-07	Other
Nanos1	5.89423e-12	0.104378	0.35	0.111	9.62587e-08	gene_expression
Ehd3	1.61523e-07	0.104259	0.494	0.234	0.00250183	gene_expression
Lrrfip1	1.40106e-09	0.10424	0.272	0.089	2.24981e-05	Esr1-TF
Acbd5	1.13901e-07	0.104226	0.405	0.181	0.00177059	Other
Slbp	1.77066e-11	0.104027	0.444	0.162	2.88121e-07	gene_expression
D1Ertd622e	2.21815e-08	0.103984	0.342	0.137	0.000349736	Other
Abhd17b	4.1572e-10	0.103974	0.381	0.142	6.70431e-06	Other
Zcchc7	2.15288e-08	0.103898	0.584	0.268	0.000339595	gene_expression
4930430F08Rik	1.00098e-09	0.10389	0.253	0.078	1.60927e-05	Other
Ggct	3.73217e-11	0.103875	0.311	0.099	6.06217e-07	Other
Rps19bp1	2.17327e-08	0.103557	0.272	0.099	0.000342747	gene_expression
Ankrd46	1.33635e-07	0.103458	0.685	0.338	0.00207361	Other
Chordc1	6.68501e-09	0.103229	0.626	0.288	0.000106512	gene_expression
Tmem135	8.46133e-11	0.103227	0.358	0.124	1.37192e-06	Other
Csmd2	6.05453e-08	0.10309	0.323	0.131	0.000946262	Other
Foxg1	1.12685e-07	0.103081	0.623	0.314	0.00175181	Other
Wdr47	7.24221e-09	0.102666	0.65	0.303	0.00011534	Other
3110035E14Rik	2.271e-11	0.102378	0.249	0.068	3.69241e-07	Other
Fgd3	1.20197e-06	0.102122	0.101	0.022	0.018151	gene_expression
Smc3	1.0219e-09	0.102066	0.549	0.232	1.64271e-05	Other
9930021J03Rik	2.82791e-08	0.101936	0.514	0.235	0.000445056	Other
Rsf1	1.84675e-07	0.10187	0.673	0.338	0.002856	gene_expression
Lpin1	8.29299e-10	0.101816	0.44	0.173	1.33368e-05	Other
Sgpp1	4.31132e-07	0.101692	0.584	0.288	0.00660062	Other
Arl1	5.79238e-09	0.101604	0.584	0.257	9.23653e-05	gene_expression
Pdhb	1.19022e-07	0.10157	0.642	0.323	0.00184948	Other
Kcnd2	1.1706e-07	0.101485	0.475	0.226	0.00181934	synapse_excitability
Homer1	3.68432e-08	0.101407	0.307	0.12	0.000578549	synapse_excitability
Myo9a	8.06327e-08	0.101399	0.553	0.259	0.00125747	Other
Tug1	4.20254e-07	0.100927	0.696	0.365	0.00643745	Other
Sdhaf1	2.64063e-10	0.100859	0.405	0.151	4.26515e-06	Other
Syncrip	1.37743e-08	0.100813	0.451	0.195	0.000218295	gene_expression
Jakmip2	1.57005e-08	0.100685	0.362	0.146	0.000248523	Other
Nifk	1.65316e-10	0.10068	0.233	0.064	2.67383e-06	gene_expression
Zfp664	4.00119e-07	0.100457	0.545	0.266	0.00613342	Other
Zfp810	2.2216e-10	0.100406	0.163	0.033	3.59099e-06	Other
B3glct	6.75255e-10	0.100384	0.128	0.02	1.08669e-05	Other
Tmem132b	1.21593e-09	0.10034	0.424	0.168	1.9534e-05	Other
Oprk1	2.53892e-06	0.100203	0.451	0.23	0.0379137	synapse_excitability
Cyld	1.65641e-07	0.100084	0.72	0.367	0.00256446	Other
Cept1	2.13157e-10	0.100077	0.354	0.124	3.4459e-06	Other

## Sheet: P50MvsEsr1KOM_VgatEsr1
	p_val	avg_logFC	pct.1	pct.2	p_val_adj	p_val_adjust	gene_category
mt-Co2	1.06358e-108	1.17593	1	0.987	2.17097e-104	1.76022e-104	energy
mt-Atp6	7.67957e-112	1.14357	1	0.998	1.56755e-107	1.27105e-107	energy
mt-Nd4	1.17703e-101	0.92072	1	0.995	2.40255e-97	1.94775e-97	energy
mt-Nd1	1.09761e-106	0.894661	1	0.998	2.24045e-102	1.81644e-102	energy
Rpl22l1	9.45622e-80	0.754947	1	0.979	1.9302e-75	1.56434e-75	gene_expression
Gm47283	6.84215e-93	0.750384	0.63	0.016	1.39662e-88	1.13217e-88	Other
mt-Nd2	5.56834e-80	0.742267	1	0.966	1.13661e-75	9.21227e-76	energy
mt-Nd3	1.3757e-55	0.728434	0.987	0.685	2.80808e-51	2.27554e-51	energy
Nts	8.46566e-22	0.709726	0.553	0.228	1.72801e-17	1.39599e-17	Other
mt-Cytb	6.31177e-81	0.636159	1	0.998	1.28836e-76	1.04428e-76	Other
Napb	2.03137e-22	0.616577	0.983	0.78	4.14644e-18	3.35034e-18	synapse_excitability
mt-Co3	9.35023e-92	0.607894	1	1	1.90857e-87	1.54709e-87	energy
Pgr	1.64633e-44	0.586755	0.817	0.242	3.3605e-40	2.72287e-40	Other
Tpt1	2.05534e-40	0.578324	0.983	0.762	4.19537e-36	3.39851e-36	gene_expression
Rps24	5.24602e-59	0.57279	1	0.992	1.07082e-54	8.67797e-55	gene_expression
Gm10076	3.90796e-36	0.563626	0.898	0.403	7.97693e-32	6.45947e-32	Other
mt-Nd5	1.87473e-34	0.557992	0.957	0.626	3.8267e-30	3.09855e-30	energy
Uqcrb	1.92327e-36	0.549029	0.817	0.287	3.92577e-32	3.17916e-32	energy
Npm1	3.11176e-38	0.544905	0.991	0.817	6.35172e-34	5.14405e-34	gene_expression
Pdzrn4	1.09543e-29	0.542737	0.847	0.398	2.236e-25	1.80932e-25	Other
Fstl5	6.62419e-30	0.532017	0.889	0.446	1.35213e-25	1.09425e-25	Other
Kcnq1ot1	7.35192e-32	0.529533	0.979	0.66	1.50067e-27	1.21483e-27	Other
mt-Nd4l	6.21134e-33	0.522123	0.915	0.411	1.26786e-28	1.02649e-28	energy
Tmem35a	1.18896e-24	0.479937	0.702	0.287	2.4269e-20	1.96226e-20	Other
Rpl39	2.75789e-38	0.476347	0.996	0.936	5.6294e-34	4.55934e-34	gene_expression
2010107E04Rik	9.94906e-26	0.46235	0.847	0.396	2.0308e-21	1.64229e-21	Other
Ptp4a1	9.35645e-25	0.458672	0.928	0.51	1.90984e-20	1.54428e-20	Other
Esr1	5.79473e-29	0.45651	0.664	0.217	1.18282e-24	9.57058e-25	Esr1
Nrip1	8.24306e-29	0.446088	0.545	0.149	1.68257e-24	1.36134e-24	gene_expression
Nos1	1.52755e-17	0.444968	0.6	0.266	3.11804e-13	2.51451e-13	Other
Vsnl1	2.27291e-17	0.442981	0.821	0.486	4.63947e-13	3.74076e-13	Other
Cntnap2	4.02099e-22	0.442352	0.932	0.621	8.20764e-18	6.63141e-18	morphology
Tcaf1	7.41138e-26	0.44196	0.898	0.509	1.51281e-21	1.22347e-21	synapse_excitability
Pak3	8.05509e-28	0.432177	0.996	0.849	1.64421e-23	1.33022e-23	morphology
Prkce	1.94574e-20	0.428441	0.906	0.589	3.97165e-16	3.20756e-16	gene_expression
Nexmif	1.63884e-26	0.416775	0.736	0.265	3.34521e-22	2.70573e-22	Other
Eif1b	1.82344e-22	0.41619	0.962	0.719	3.722e-18	3.00758e-18	gene_expression
Id4	6.55781e-17	0.414624	0.787	0.448	1.33858e-12	1.07889e-12	Other
Ap1s2	7.27318e-09	0.411844	0.532	0.319	0.00014846	0.000117266	gene_expression
Unc5d	1.67258e-16	0.410604	0.838	0.493	3.41406e-12	2.75055e-12	Other
Eef1b2	5.22679e-25	0.406906	0.979	0.721	1.06689e-20	8.62734e-21	gene_expression
Rpl12	1.82044e-23	0.402707	1	0.931	3.71589e-19	3.00337e-19	gene_expression
Gm9493	1.71242e-42	0.397099	0.413	0.039	3.49539e-38	2.83183e-38	Other
Lrp1b	1.03114e-18	0.390069	0.94	0.579	2.10477e-14	1.6986e-14	Other
Chl1	5.87749e-16	0.387327	0.791	0.474	1.19971e-11	9.65966e-12	Other
Grik1	5.32127e-18	0.386596	0.643	0.276	1.08618e-13	8.76094e-14	synapse_excitability
Ctnna2	2.56483e-20	0.386341	0.757	0.348	5.23533e-16	4.22787e-16	morphology
5330434G04Rik	1.63165e-19	0.377585	0.796	0.387	3.33053e-15	2.68896e-15	Other
Parm1	1.12614e-18	0.37624	0.609	0.247	2.29868e-14	1.85487e-14	Other
Smim10l1	5.13823e-19	0.374806	0.94	0.565	1.04881e-14	8.46471e-15	Other
Slc32a1	1.23615e-18	0.366385	0.894	0.533	2.52322e-14	2.03593e-14	synapse_excitability
Phyhipl	2.56818e-21	0.358638	0.681	0.265	5.24217e-17	4.23442e-17	Other
Rpl30	4.70425e-24	0.358562	0.991	0.953	9.60231e-20	7.76295e-20	gene_expression
Ndufa4	1.81156e-17	0.352742	0.851	0.435	3.69775e-13	2.98164e-13	energy
Rpl7	1.3089e-18	0.351143	0.991	0.949	2.67172e-14	2.15562e-14	gene_expression
Gda	3.74463e-09	0.348081	0.638	0.39	7.64354e-05	6.05058e-05	synapse_excitability
Khdrbs1	3.28976e-17	0.346366	0.723	0.334	6.71506e-13	5.41396e-13	gene_expression
Irs4	2.14663e-15	0.343266	0.983	0.77	4.3817e-11	3.52563e-11	Other
Prlr	2.12836e-14	0.342829	0.885	0.62	4.3444e-10	3.49157e-10	gene_expression
Meg3	1.21988e-39	0.340042	1	1	2.49003e-35	2.01683e-35	Other
Map2	2.35714e-19	0.33929	0.991	0.745	4.81139e-15	3.88409e-15	morphology
Cnbp	4.46769e-17	0.337929	0.787	0.384	9.11946e-13	7.35159e-13	gene_expression
Psd3	1.44954e-15	0.335983	0.766	0.396	2.95881e-11	2.38102e-11	Other
Rpl23	1.049e-30	0.332941	1	0.99	2.14122e-26	1.73316e-26	gene_expression
Gdi2	4.24601e-16	0.331913	0.864	0.477	8.66696e-12	6.97917e-12	gene_expression
Tmsb4x	6.94586e-24	0.329957	1	0.986	1.41779e-19	1.14614e-19	Other
Camk4	5.63781e-20	0.329821	0.515	0.175	1.15079e-15	9.29224e-16	Other
Tbca	4.4371e-18	0.329205	0.966	0.681	9.05701e-14	7.30569e-14	gene_expression
Pcdh7	2.63667e-13	0.328588	0.881	0.583	5.38197e-09	4.31992e-09	synapse_excitability
Rps15a	9.862e-28	0.32666	1	0.982	2.01303e-23	1.62841e-23	gene_expression
Zbtb20	5.87439e-07	0.324929	0.936	0.856	0.0119908	0.00926568	Esr1-TF
Nrp1	1.75723e-20	0.316887	0.489	0.151	3.58686e-16	2.89697e-16	morphology
Gad2	1.79435e-13	0.31669	0.987	0.859	3.66264e-09	2.94077e-09	synapse_excitability
Pdha1	6.26228e-18	0.316156	0.655	0.265	1.27826e-13	1.03096e-13	energy
Rpl17	1.8233e-31	0.31615	1	1	3.72172e-27	3.01264e-27	gene_expression
Rps4x	6.92795e-23	0.31367	1	0.994	1.41413e-18	1.14283e-18	gene_expression
Ankrd46	1.69241e-13	0.312837	0.813	0.453	3.45454e-09	2.77385e-09	Other
Cox5a	1.41869e-16	0.312507	0.774	0.364	2.89582e-12	2.33331e-12	energy
Nefl	6.2785e-13	0.311472	0.677	0.345	1.28157e-08	1.02792e-08	morphology
Plcb4	1.41994e-15	0.310827	0.672	0.31	2.89839e-11	2.33254e-11	Other
Prkacb	4.77433e-17	0.310315	1	0.913	9.74535e-13	7.8552e-13	Other
Spock3	1.73291e-11	0.304899	0.74	0.429	3.53721e-07	2.82915e-07	Other
Pcp4	1.09598e-08	0.304563	0.991	0.944	0.000223712	0.000176409	Other
Zmat4	1.29556e-12	0.304508	0.481	0.212	2.6445e-08	2.12005e-08	Esr1-TF
Eif4g2	1.9801e-13	0.301279	0.974	0.787	4.04177e-09	3.24478e-09	gene_expression
Pgrmc1	2.3857e-13	0.297472	0.97	0.761	4.8697e-09	3.90922e-09	Other
Rps27rt	3.54983e-13	0.29597	0.868	0.522	7.24591e-09	5.81498e-09	Other
Ube2v2	3.33624e-15	0.294121	0.779	0.38	6.80994e-11	5.47778e-11	Other
Slitrk1	9.57872e-17	0.292037	0.638	0.274	1.95521e-12	1.5757e-12	morphology
Pcdh17	9.94319e-17	0.291964	0.996	0.904	2.0296e-12	1.63555e-12	synapse_excitability
Fut9	1.35376e-15	0.290145	0.711	0.326	2.76329e-11	2.22409e-11	gene_expression
Drp2	2.41766e-19	0.289152	0.489	0.157	4.93493e-15	3.98358e-15	Other
Il1rap	1.78291e-24	0.28904	0.438	0.103	3.63927e-20	2.94233e-20	synapse_excitability
Rps3a1	1.65303e-23	0.288539	1	0.997	3.37416e-19	2.72733e-19	Other
Rplp1	1.74362e-27	0.287926	1	0.997	3.55907e-23	2.87889e-23	gene_expression
Rps12	2.38402e-16	0.286559	0.996	0.971	4.86627e-12	3.92005e-12	Other
Tmcc3	4.86756e-12	0.285609	0.838	0.507	9.93567e-08	7.95603e-08	Other
Rpl21	3.50235e-26	0.283366	1	0.995	7.149e-22	5.78203e-22	gene_expression
Slitrk5	3.52948e-13	0.283202	0.643	0.3	7.20438e-09	5.782e-09	morphology
Fgfr1	5.40641e-12	0.282924	0.638	0.313	1.10356e-07	8.83624e-08	gene_expression
Snn	2.65131e-15	0.282282	0.638	0.276	5.41186e-11	4.35425e-11	Other
Atp5f1	5.26843e-15	0.282229	0.774	0.363	1.07539e-10	8.64918e-11	energy
Rps20	9.39651e-18	0.280252	0.996	0.97	1.91801e-13	1.54685e-13	gene_expression
Rps10	2.9043e-16	0.278375	0.996	0.966	5.92825e-12	4.77496e-12	Esr1-TF
Mllt11	1.58382e-13	0.278346	0.966	0.796	3.23289e-09	2.59619e-09	Other
Eef1a1	3.26391e-23	0.275133	1	0.997	6.6623e-19	5.38448e-19	gene_expression
Chpt1	3.37762e-16	0.274802	0.438	0.148	6.8944e-12	5.55247e-12	gene_expression
Polr2k	2.92746e-20	0.273538	0.583	0.194	5.97554e-16	4.82534e-16	gene_expression
Cadm2	5.53371e-12	0.273479	0.63	0.316	1.12954e-07	9.04374e-08	Other
Snhg12	9.05593e-10	0.269595	0.8	0.47	1.8485e-05	1.46851e-05	Other
Hmgcs1	1.80003e-10	0.269533	0.809	0.491	3.67422e-06	2.92883e-06	Other
Gfra1	4.70372e-14	0.269222	0.566	0.247	9.60124e-10	7.71269e-10	Other
Greb1	7.50688e-23	0.2684	0.298	0.048	1.5323e-18	1.23826e-18	Other
Fut8	7.61781e-17	0.267545	0.579	0.217	1.55495e-12	1.25321e-12	gene_expression
Ubl3	7.39209e-10	0.267174	0.787	0.459	1.50887e-05	1.19885e-05	Other
Mblac2	1.07229e-16	0.266463	0.723	0.297	2.18875e-12	1.7637e-12	Other
Ola1	2.85375e-18	0.266183	0.617	0.228	5.82507e-14	4.69898e-14	gene_expression
Ogt	3.20243e-10	0.263077	0.957	0.726	6.5368e-06	5.20619e-06	gene_expression
Hpcal1	4.73669e-10	0.262574	0.902	0.668	9.66852e-06	7.69238e-06	Other
Eif3e	6.85558e-11	0.261651	0.855	0.515	1.39936e-06	1.11712e-06	gene_expression
Maged1	5.9541e-11	0.258807	0.966	0.796	1.21535e-06	9.70637e-07	Other
Large1	2.89864e-19	0.257884	0.498	0.154	5.91671e-15	4.77581e-15	gene_expression
Gpbp1	4.11767e-16	0.257714	0.638	0.252	8.40499e-12	6.76863e-12	Other
Hs3st5	1.75406e-16	0.256716	0.519	0.185	3.5804e-12	2.88438e-12	gene_expression
Pdcd7	4.80946e-12	0.252729	0.6	0.281	9.81708e-08	7.86155e-08	Other
Scoc	4.61974e-12	0.252717	0.962	0.705	9.42982e-08	7.55189e-08	gene_expression
Minos1	1.21059e-10	0.249274	0.919	0.631	2.47105e-06	1.97096e-06	energy
Actg1	6.32183e-11	0.248668	0.996	0.846	1.29041e-06	1.03033e-06	morphology
Impact	3.44449e-14	0.247645	1	0.97	7.0309e-10	5.64931e-10	gene_expression
Tsr2	4.55687e-12	0.246907	0.745	0.374	9.30149e-08	7.44958e-08	Other
Dynlt3	1.82204e-15	0.246776	0.562	0.218	3.71915e-11	2.99271e-11	Other
Rps25	1.5139e-18	0.246327	1	0.99	3.09018e-14	2.4931e-14	gene_expression
Sptbn1	6.7897e-12	0.246099	0.953	0.713	1.38591e-07	1.10937e-07	morphology
mt-Co1	1.50482e-32	0.244541	1	1	3.07165e-28	2.48672e-28	energy
Arfgef3	8.50279e-09	0.243185	0.919	0.636	0.000173559	0.000137031	Other
Rplp2	3.02571e-14	0.242683	0.996	0.986	6.17607e-10	4.96306e-10	gene_expression
Fam92a	1.89843e-18	0.242232	0.54	0.178	3.87508e-14	3.12615e-14	Other
Rtraf	9.31873e-11	0.242184	0.894	0.602	1.90214e-06	1.51756e-06	Other
Tcp1	1.41981e-09	0.241568	0.872	0.557	2.89811e-05	2.30051e-05	gene_expression
Cops2	1.70884e-14	0.24133	0.698	0.303	3.48809e-10	2.80421e-10	synapse_excitability
Atp5e	6.4607e-09	0.240196	0.911	0.657	0.000131876	0.000104237	energy
Phactr1	6.06909e-12	0.238636	0.638	0.316	1.23882e-07	9.9175e-08	Other
Nrsn1	3.15919e-11	0.238391	0.996	0.913	6.44853e-07	5.15484e-07	synapse_excitability
Polr3k	3.50694e-19	0.238075	0.502	0.159	7.15837e-15	5.77769e-15	Other
Snca	6.37511e-07	0.237818	0.494	0.286	0.0130129	0.0100465	synapse_excitability
Paip2	1.23541e-10	0.236683	0.83	0.482	2.52173e-06	2.01126e-06	gene_expression
Gm10073	2.02137e-21	0.236471	0.332	0.066	4.12601e-17	3.33303e-17	Other
Rpl22	4.57359e-10	0.235582	0.919	0.639	9.3356e-06	7.42796e-06	gene_expression
Olfm3	3.43293e-10	0.234131	0.609	0.313	7.0073e-06	5.5792e-06	Other
Rpl18	1.36631e-10	0.233998	0.983	0.884	2.78892e-06	2.22395e-06	gene_expression
Lamp5	3.78662e-13	0.23292	0.43	0.164	7.72924e-09	6.20172e-09	synapse_excitability
Serinc1	6.52143e-09	0.232352	0.991	0.854	0.000133115	0.00010521	Other
Abat	5.43254e-10	0.232284	0.928	0.689	1.10889e-05	8.81919e-06	energy
Zfp638	2.76837e-15	0.231999	0.562	0.217	5.65079e-11	4.54621e-11	Other
Dlgap1	7.26405e-09	0.231292	0.647	0.358	0.000148274	0.000117126	Other
Rpl9-ps6	7.74045e-22	0.230626	0.383	0.085	1.57998e-17	1.27648e-17	Other
Adra2a	1.88224e-12	0.229937	0.294	0.091	3.84203e-08	3.07935e-08	synapse_excitability
Epm2aip1	1.59219e-07	0.229742	0.881	0.632	0.00324999	0.00253143	gene_expression
Pts	4.66295e-17	0.22886	0.362	0.098	9.51802e-13	7.67243e-13	Other
Prkcb	2.2434e-10	0.228298	0.698	0.364	4.57923e-06	3.64845e-06	Other
Unc80	1.99962e-10	0.225756	0.915	0.596	4.08163e-06	3.25298e-06	Other
Hspa4l	3.1569e-08	0.224561	0.834	0.528	0.000644387	0.000506304	gene_expression
Hsp90b1	2.14136e-09	0.224316	0.817	0.536	4.37094e-05	3.466e-05	gene_expression
Tspyl4	4.9454e-09	0.224063	0.97	0.809	0.000100945	7.98583e-05	Other
Eloc	2.44354e-12	0.22319	0.757	0.368	4.98776e-08	3.99666e-08	Other
Tmem30a	2.81866e-09	0.222452	0.919	0.613	5.75345e-05	4.55777e-05	Other
Rbbp7	1.52919e-11	0.221803	0.574	0.26	3.12138e-07	2.49686e-07	Other
Nap1l5	1.66315e-13	0.221447	1	0.998	3.39482e-09	2.72607e-09	Other
Rps2	4.51259e-11	0.221207	1	0.984	9.21109e-07	7.35913e-07	gene_expression
Atp2b1	1.79458e-09	0.220241	0.843	0.552	3.66309e-05	2.90578e-05	Other
Ptprm	8.56811e-16	0.220159	0.374	0.114	1.74892e-11	1.408e-11	morphology
Rps13	2.01421e-12	0.22011	1	0.973	4.1114e-08	3.29504e-08	gene_expression
Tmem178b	9.98349e-12	0.219872	0.574	0.263	2.03783e-07	1.6308e-07	Other
Rps27a	5.87313e-15	0.219384	1	0.998	1.19882e-10	9.64134e-11	gene_expression
A830018L16Rik	1.05083e-15	0.219318	0.396	0.122	2.14495e-11	1.72672e-11	Other
Rps17	1.73302e-14	0.218674	1	0.99	3.53744e-10	2.84372e-10	gene_expression
Zfp365	1.01413e-12	0.218052	0.579	0.244	2.07005e-08	1.65973e-08	Other
Spon1	1.6063e-06	0.216526	0.315	0.157	0.0327879	0.0251386	Other
Rtn4	7.86635e-09	0.216184	0.923	0.661	0.000160568	0.000126798	morphology
Rpl31	3.8121e-14	0.215964	1	0.987	7.78125e-10	6.25146e-10	gene_expression
Cdh4	3.68804e-13	0.215881	0.443	0.167	7.52804e-09	6.04102e-09	morphology
Swi5	1.95355e-10	0.215702	0.889	0.544	3.98759e-06	3.17843e-06	Other
Arhgap36	1.02588e-06	0.215403	0.34	0.173	0.0209403	0.0161156	Other
Smap1	6.65012e-12	0.215009	0.553	0.244	1.35742e-07	1.08663e-07	Other
Umad1	2.12153e-14	0.214897	0.54	0.209	4.33048e-10	3.48059e-10	Other
Dnaja1	5.00629e-08	0.214333	0.872	0.575	0.00102188	0.000801306	gene_expression
Grin2a	2.77569e-15	0.214211	0.328	0.093	5.66573e-11	4.55795e-11	Other
Tenm2	1.44272e-11	0.212894	0.532	0.241	2.94488e-07	2.35582e-07	synapse_excitability
Mcts1	1.76081e-19	0.212564	0.451	0.127	3.59418e-15	2.90165e-15	gene_expression
Selenof	1.23225e-11	0.212514	0.668	0.332	2.51526e-07	2.01251e-07	gene_expression
Camta1	8.84292e-12	0.211676	0.983	0.849	1.80502e-07	1.44467e-07	gene_expression
1500009L16Rik	7.66218e-07	0.211504	0.817	0.536	0.01564	0.0120564	Other
Cfl1	1.05914e-09	0.211434	0.979	0.809	2.16192e-05	1.71708e-05	morphology
Btf3	9.27393e-08	0.211293	0.928	0.65	0.00189299	0.0014791	gene_expression
Gnai1	9.72959e-08	0.211286	0.711	0.414	0.001986	0.00155109	gene_expression
Zyg11b	3.14386e-09	0.211242	0.774	0.427	6.41725e-05	5.08205e-05	Other
Eif2s3y	6.25215e-16	0.210825	0.46	0.152	1.27619e-11	1.02748e-11	Other
Zcchc18	6.9161e-11	0.210449	0.987	0.846	1.41171e-06	1.12691e-06	Other
Tiparp	1.57219e-16	0.210322	0.289	0.067	3.20916e-12	2.58563e-12	Other
Tatdn1	3.46415e-14	0.209367	0.6	0.242	7.07102e-10	5.6812e-10	Other
Eif4g3	3.32307e-10	0.209359	0.821	0.464	6.78305e-06	5.40099e-06	gene_expression
Hspa5	5.55013e-10	0.209323	0.677	0.35	1.13289e-05	9.00896e-06	gene_expression
Oxct1	3.74057e-09	0.208594	0.677	0.36	7.63526e-05	6.04439e-05	energy
Nbdy	2.19784e-09	0.208123	0.753	0.422	4.48624e-05	3.55721e-05	gene_expression
Shisa2	1.07327e-15	0.207874	0.196	0.03	2.19076e-11	1.76349e-11	Other
Pgm2l1	1.81286e-08	0.20777	0.826	0.525	0.000370041	0.000291308	Other
Itfg1	2.00906e-08	0.206889	0.804	0.486	0.000410089	0.000322735	Other
Nap1l1	1.39143e-08	0.20643	0.923	0.626	0.000284018	0.000223783	gene_expression
Syt6	1.96981e-10	0.205903	0.421	0.181	4.02077e-06	3.20468e-06	gene_expression
Glra2	1.6704e-12	0.205763	0.345	0.119	3.40963e-08	2.73295e-08	Other
Pgk1	3.59113e-10	0.205398	0.672	0.348	7.33021e-06	5.83522e-06	energy
Dld	4.44371e-14	0.204966	0.468	0.172	9.07051e-10	7.2868e-10	energy
Nudt4	2.73024e-13	0.204733	0.536	0.215	5.57296e-09	4.47295e-09	gene_expression
Tmem215	3.3571e-16	0.204243	0.272	0.061	6.8525e-12	5.51907e-12	Other
Stim2	6.27039e-15	0.204046	0.387	0.124	1.27991e-10	1.02928e-10	Other
Arl5a	2.25566e-11	0.203331	0.617	0.284	4.60425e-07	3.68169e-07	Other
Sytl4	1.61921e-10	0.201916	0.14	0.026	3.30514e-06	2.63495e-06	synapse_excitability
Rbms3	6.35048e-07	0.199649	0.451	0.236	0.0129626	0.010009	Other
Pcmt1	4.51779e-09	0.199503	0.8	0.464	9.22171e-05	7.29758e-05	gene_expression
Ncl	6.62568e-08	0.199407	0.86	0.555	0.00135243	0.00105905	gene_expression
Rpl5	3.98663e-09	0.199071	0.97	0.817	8.1375e-05	6.44079e-05	gene_expression
Fth1	4.28532e-16	0.198651	1	0.998	8.74721e-12	7.04336e-12	gene_expression
Pdia3	1.01199e-13	0.198227	0.54	0.212	2.06568e-09	1.65906e-09	gene_expression
Epm2a	2.7488e-16	0.197626	0.426	0.133	5.61085e-12	4.51957e-12	Other
Astn1	5.56959e-07	0.19728	0.932	0.652	0.0113686	0.0087877	Other
Idi1	1.32769e-12	0.196962	0.362	0.127	2.71008e-08	2.1725e-08	Other
Nop56	2.23017e-09	0.19669	0.732	0.384	4.55222e-05	3.60886e-05	gene_expression
Ccdc85a	1.76634e-14	0.19638	0.472	0.172	3.60546e-10	2.89822e-10	Other
Vps50	3.97772e-15	0.195948	0.498	0.177	8.11931e-11	6.53061e-11	Other
Sh3gl2	9.53099e-08	0.195351	0.689	0.377	0.00194546	0.00151981	synapse_excitability
Apoc3	6.90932e-15	0.195162	0.485	0.173	1.41033e-10	1.1341e-10	Other
Brinp2	3.82713e-10	0.194857	0.609	0.299	7.81194e-06	6.21794e-06	synapse_excitability
Srsf3	5.39607e-08	0.19463	0.877	0.583	0.00110145	0.00086348	gene_expression
Hspe1	3.36892e-08	0.194122	0.945	0.652	0.000687665	0.000540173	gene_expression
Neto2	4.2376e-10	0.193793	0.345	0.136	8.64979e-06	6.88314e-06	Other
Ntng1	9.3045e-07	0.193198	0.736	0.51	0.0189924	0.0146276	morphology
Dnajc19	2.78776e-12	0.192742	0.532	0.217	5.69037e-08	4.55798e-08	gene_expression
Tmod2	1.02038e-08	0.19174	0.915	0.608	0.00020828	0.000164312	synapse_excitability
Irs2	4.83933e-09	0.190867	0.566	0.281	9.87804e-05	7.81503e-05	gene_expression
Armcx1	1.36087e-10	0.190099	0.515	0.234	2.77781e-06	2.21523e-06	Other
B4gat1	1.28011e-12	0.189884	0.502	0.202	2.61296e-08	2.0949e-08	gene_expression
Pgam1	1.44755e-06	0.189003	0.906	0.663	0.0295475	0.0226658	gene_expression
Scml4	2.76621e-12	0.18895	0.362	0.125	5.64638e-08	4.5233e-08	Other
Nedd4	3.07733e-09	0.188506	0.962	0.746	6.28145e-05	4.97512e-05	gene_expression
Sacs	5.56857e-14	0.188256	0.357	0.112	1.13666e-09	9.12967e-10	morphology
Pip4k2a	2.31965e-07	0.187589	0.294	0.13	0.00473488	0.00367874	Other
Atp1b3	2.4617e-07	0.187484	0.74	0.425	0.00502481	0.00390154	synapse_excitability
Adgrb3	6.3013e-09	0.18695	0.762	0.427	0.000128622	0.000101678	synapse_excitability
Gm16485	5.99552e-13	0.186717	0.26	0.069	1.2238e-08	9.81646e-09	Other
Rpl7a	2.30124e-07	0.186553	0.996	0.907	0.00469729	0.00365045	gene_expression
Lrrfip2	7.60855e-11	0.186408	0.421	0.173	1.55306e-06	1.23943e-06	Other
Lancl2	1.14836e-15	0.186144	0.443	0.143	2.34404e-11	1.88676e-11	Other
Hprt	1.73304e-08	0.185986	0.77	0.433	0.000353748	0.000278551	Other
Ube2e1	5.12626e-09	0.185898	0.672	0.358	0.000104637	8.27686e-05	Other
Fndc9	1.73022e-11	0.185611	0.502	0.21	3.53172e-07	2.82492e-07	Other
Pappa	1.42947e-12	0.18497	0.187	0.039	2.91784e-08	2.3389e-08	gene_expression
Cd83	2.42967e-09	0.184705	0.515	0.249	4.95945e-05	3.93048e-05	Other
Dock4	3.27067e-10	0.183157	0.387	0.159	6.67609e-06	5.3168e-06	morphology
Hcn1	7.54495e-08	0.182684	0.557	0.292	0.00154008	0.00120478	Other
Vdac2	3.67485e-09	0.18231	0.647	0.337	7.50111e-05	5.93856e-05	energy
Krt222	2.85026e-15	0.182226	0.34	0.096	5.81795e-11	4.68013e-11	Other
Slitrk6	1.84563e-13	0.182014	0.196	0.039	3.76731e-09	3.02462e-09	morphology
Kcnd2	3.50594e-07	0.181698	0.638	0.369	0.00715632	0.00554674	synapse_excitability
Mindy3	7.39602e-15	0.181512	0.379	0.119	1.50968e-10	1.21391e-10	Other
Npy1r	5.47286e-09	0.181191	0.234	0.08	0.000111712	8.83484e-05	Other
Eif1	3.62184e-11	0.181045	0.991	0.989	7.39289e-07	5.90866e-07	gene_expression
Htr1b	9.54237e-08	0.18035	0.357	0.164	0.00194779	0.00152153	synapse_excitability
Nrcam	4.66189e-11	0.180107	0.451	0.191	9.51585e-07	7.60214e-07	morphology
Myh10	1.49917e-07	0.179538	0.728	0.427	0.0030601	0.00238487	Other
Atxn2	1.81215e-08	0.179351	0.596	0.313	0.000369896	0.000291212	gene_expression
Rbfox3	2.86821e-06	0.179339	0.855	0.594	0.0585458	0.0446723	gene_expression
Plcxd3	2.24632e-11	0.17911	0.451	0.189	4.58518e-07	3.66666e-07	Other
Cdh8	4.09411e-11	0.178424	0.315	0.109	8.35689e-07	6.67708e-07	morphology
Hspa8	3.30389e-08	0.177575	0.979	0.931	0.000674389	0.000529811	gene_expression
Cct4	5.92914e-10	0.177473	0.638	0.316	1.21026e-05	9.62239e-06	gene_expression
Ece2	5.83449e-13	0.176974	0.447	0.165	1.19094e-08	9.5534e-09	gene_expression
Galnt13	4.5854e-13	0.176902	0.502	0.194	9.35971e-09	7.50904e-09	gene_expression
Adarb2	5.23526e-09	0.176866	0.413	0.186	0.000106862	8.45233e-05	gene_expression
Sccpdh	2.55695e-09	0.176752	0.672	0.36	5.21925e-05	4.13561e-05	energy
Polr1d	2.42397e-07	0.174922	0.821	0.507	0.00494782	0.00384273	Other
Rpl26	2.77486e-12	0.174834	1	1	5.66405e-08	4.53718e-08	gene_expression
Gria3	3.41198e-11	0.174491	0.587	0.268	6.96454e-07	5.56699e-07	synapse_excitability
Fgf12	6.81907e-10	0.174475	0.557	0.263	1.39191e-05	1.10633e-05	synapse_excitability
Sec61g	3.53664e-07	0.174289	0.906	0.618	0.00721898	0.00559496	gene_expression
Larp4b	1.09101e-07	0.174108	0.826	0.494	0.00222697	0.00173842	gene_expression
Dnajc21	2.71028e-10	0.174043	0.536	0.247	5.53223e-06	4.40665e-06	gene_expression
Rps7	1.95379e-11	0.173676	0.996	0.994	3.98808e-07	3.18956e-07	gene_expression
Snx10	1.64711e-07	0.173557	0.766	0.448	0.00336209	0.00261858	gene_expression
Rpl23a	5.78953e-12	0.173124	1	0.997	1.18176e-07	9.46125e-08	gene_expression
Idnk	7.78723e-11	0.172528	0.481	0.204	1.58953e-06	1.26838e-06	Other
Bclaf1	7.34038e-08	0.172329	0.881	0.543	0.00149832	0.00117248	gene_expression
Ube2d2a	2.0519e-07	0.172287	0.826	0.538	0.00418833	0.00325739	Other
Crk	6.22666e-11	0.17215	0.668	0.313	1.27099e-06	1.01488e-06	Other
Rad23b	4.71219e-07	0.171253	0.8	0.501	0.00961852	0.00744385	Other
Ssb	8.9966e-12	0.171053	0.681	0.323	1.83639e-07	1.46968e-07	gene_expression
Hs2st1	4.80531e-08	0.170988	0.711	0.395	0.000980861	0.000769283	gene_expression
Chst11	5.9627e-11	0.170854	0.4	0.159	1.21711e-06	9.7192e-07	gene_expression
Ets2	4.66254e-07	0.170593	0.689	0.404	0.00951717	0.00736634	Other
Mettl9	1.59697e-09	0.169661	0.647	0.321	3.25974e-05	2.58678e-05	Other
Vps35	7.29845e-10	0.169087	0.651	0.323	1.48976e-05	1.18374e-05	gene_expression
Synj1	1.23355e-06	0.168975	0.966	0.793	0.0251793	0.0193421	gene_expression
Erich3	6.5122e-11	0.168665	0.396	0.152	1.32927e-06	1.06129e-06	Other
Ppia	1.90198e-07	0.168435	0.983	0.849	0.00388232	0.0030213	gene_expression
Tnpo3	5.25067e-10	0.168372	0.574	0.271	1.07177e-05	8.52499e-06	Other
Frmd4a	4.05023e-11	0.167704	0.613	0.274	8.26733e-07	6.60593e-07	Other
Bcl2l2	3.67299e-11	0.167069	0.545	0.236	7.49731e-07	5.99138e-07	Other
Rnf7	1.72048e-07	0.167055	0.774	0.446	0.00351184	0.0027347	Other
Gabra3	8.10835e-08	0.166481	0.715	0.395	0.00165508	0.00129425	synapse_excitability
Lingo2	7.15858e-09	0.16491	0.723	0.4	0.000146121	0.000115446	morphology
Snrpd1	2.43846e-09	0.164863	0.536	0.249	4.97738e-05	3.94445e-05	gene_expression
Hnrnpa3	1.9497e-06	0.164754	0.932	0.708	0.0397973	0.0304602	gene_expression
Cacybp	2.66631e-11	0.164482	0.591	0.258	5.44248e-07	4.35143e-07	Other
Ankrd13c	8.48916e-11	0.164177	0.528	0.231	1.73281e-06	1.38263e-06	gene_expression
Vldlr	6.87306e-13	0.1641	0.455	0.167	1.40293e-08	1.12519e-08	morphology
Cacul1	1.2125e-09	0.164069	0.613	0.297	2.47496e-05	1.96546e-05	Other
Eif1a	3.30626e-09	0.163892	0.583	0.286	6.74873e-05	5.3439e-05	Other
Mrpl42	2.85809e-11	0.162991	0.54	0.231	5.83393e-07	4.66383e-07	energy
Wnt4	1.85358e-06	0.162803	0.268	0.124	0.0378353	0.0289752	Other
Sdhaf3	8.81512e-13	0.162648	0.277	0.077	1.79934e-08	1.44295e-08	energy
Ywhab	4.11024e-07	0.162618	0.987	0.95	0.00838982	0.00649706	gene_expression
Nos1ap	4.23729e-10	0.162158	0.596	0.273	8.64916e-06	6.88306e-06	Other
Fam8a1	6.05711e-08	0.161987	0.774	0.425	0.00123638	0.000968531	Other
Snx5	9.51644e-13	0.161879	0.404	0.143	1.9425e-08	1.55756e-08	gene_expression
Hapln4	7.62799e-09	0.161054	0.472	0.218	0.000155703	0.000122971	synapse_excitability
Gpd2	1.02694e-09	0.15964	0.6	0.291	2.09618e-05	1.66497e-05	energy
5730455P16Rik	1.60944e-09	0.159479	0.63	0.31	3.28519e-05	2.60681e-05	Other
Rpl28	7.29207e-07	0.159262	0.987	0.889	0.0148846	0.0114777	gene_expression
Syndig1l	1.20797e-08	0.158912	0.272	0.104	0.000246571	0.000194363	Other
Phyh	5.4373e-13	0.158555	0.285	0.08	1.10986e-08	8.90358e-09	Other
Plxnc1	9.03046e-07	0.158522	0.617	0.358	0.018433	0.0141977	morphology
A230057D06Rik	5.15949e-08	0.158145	0.557	0.291	0.00105316	0.000825673	Other
Nt5c3	1.37195e-13	0.157713	0.477	0.17	2.80043e-09	2.24904e-09	Other
Cycs	1.06331e-07	0.157643	0.728	0.392	0.00217044	0.00169439	energy
Kif5b	9.87266e-07	0.157638	0.881	0.576	0.0201521	0.0155119	Other
Rpl9	5.69876e-11	0.157584	1	0.998	1.16323e-06	9.29126e-07	gene_expression
Cand1	4.81833e-08	0.157486	0.668	0.35	0.000983517	0.000771318	gene_expression
Ctnnb1	1.94624e-06	0.157049	0.817	0.535	0.0397266	0.030408	gene_expression
Ankib1	2.25379e-10	0.156715	0.404	0.162	4.60044e-06	3.66512e-06	Other
Ankrd12	2.08766e-06	0.156351	0.855	0.53	0.0426134	0.0326031	Other
Zfp120	8.0657e-15	0.155796	0.281	0.069	1.64637e-10	1.32374e-10	Other
Dmtf1	7.37105e-12	0.155147	0.383	0.136	1.50458e-07	1.20428e-07	Other
Fbxo33	8.47617e-09	0.155069	0.655	0.331	0.000173016	0.00013661	Other
Ncbp2	1.37138e-09	0.154974	0.511	0.23	2.79926e-05	2.22246e-05	gene_expression
Cckar	2.60549e-09	0.154241	0.209	0.064	5.31832e-05	4.21359e-05	Other
Lpgat1	6.69184e-07	0.154151	0.74	0.446	0.0136594	0.010543	gene_expression
Ndufb5	9.62786e-07	0.154048	0.919	0.692	0.0196524	0.0151321	energy
Clvs1	1.30667e-10	0.153956	0.37	0.141	2.66718e-06	2.12713e-06	gene_expression
Mrps12	4.17985e-08	0.153685	0.609	0.31	0.00085319	0.000669402	energy
Atxn7l1	7.20066e-11	0.153626	0.362	0.133	1.4698e-06	1.17306e-06	Other
Acvr1c	2.40583e-14	0.153613	0.179	0.027	4.91077e-10	3.94652e-10	Other
Pcp4l1	1.97216e-09	0.153285	0.255	0.088	4.02557e-05	3.19273e-05	Other
Park2	4.81066e-11	0.153261	0.374	0.14	9.81951e-07	7.84378e-07	Other
Rpl36a-ps1	1.66225e-17	0.153245	0.221	0.034	3.39298e-13	2.73606e-13	Other
Gtf2a2	5.80056e-11	0.152762	0.472	0.194	1.18401e-06	9.45666e-07	Other
Cox8a	3.62e-07	0.152536	0.996	0.963	0.00738914	0.00572575	energy
Wdr47	2.45976e-07	0.152343	0.698	0.393	0.00502086	0.00389871	Other
Daam1	9.41235e-09	0.152245	0.54	0.26	0.000192125	0.000151614	Other
Ggps1	3.66617e-08	0.15139	0.591	0.302	0.000748339	0.00058754	Other
Got1	2.0963e-06	0.151284	0.698	0.409	0.0427896	0.0327337	Other
Txnl1	1.71195e-09	0.151166	0.6	0.292	3.49444e-05	2.77251e-05	energy
Thoc1	2.6941e-11	0.151059	0.243	0.069	5.49919e-07	4.3965e-07	gene_expression
Ephb1	2.61652e-06	0.150928	0.34	0.17	0.0534084	0.0407732	morphology
Rtn3	6.11314e-07	0.150826	0.996	0.95	0.0124781	0.00963676	Other
Snrpb2	7.09785e-09	0.150368	0.523	0.25	0.000144881	0.000114481	Other
Ift81	2.49469e-12	0.150203	0.413	0.148	5.09216e-08	4.08006e-08	Other
Ndufs4	1.05572e-10	0.149633	0.562	0.244	2.15493e-06	1.71913e-06	energy
Atg3	6.96657e-11	0.149414	0.306	0.104	1.42202e-06	1.13506e-06	gene_expression
Pclo	1.21339e-06	0.148857	0.868	0.636	0.0247678	0.0190321	Other
Vps13a	1.9674e-09	0.148763	0.489	0.223	4.01586e-05	3.18522e-05	gene_expression
Cep19	1.52143e-08	0.147651	0.553	0.265	0.000310555	0.000244586	Other
Shisa6	3.63477e-11	0.147438	0.157	0.03	7.41929e-07	5.9294e-07	Other
Rps6ka6	3.44204e-14	0.146985	0.289	0.075	7.02589e-10	5.64564e-10	gene_expression
Rpl27a	3.08559e-07	0.146961	1	0.998	0.0062983	0.0048851	gene_expression
Mfsd6	5.51069e-08	0.146903	0.677	0.355	0.00112484	0.000881656	Other
Chml	4.30824e-12	0.145998	0.221	0.055	8.79398e-08	7.04354e-08	Other
St8sia3	1.36982e-08	0.145961	0.779	0.419	0.000279608	0.000220336	gene_expression
Hecw1	6.97699e-10	0.145829	0.553	0.252	1.42414e-05	1.13188e-05	synapse_excitability
Gpr22	3.99132e-11	0.145287	0.221	0.059	8.14708e-07	6.51024e-07	Other
Ikzf2	7.29265e-10	0.144766	0.243	0.077	1.48858e-05	1.18287e-05	Other
Nemf	2.0722e-10	0.14454	0.455	0.188	4.22978e-06	3.37085e-06	gene_expression
Dync1li1	3.37918e-08	0.144271	0.63	0.329	0.000689758	0.000541783	gene_expression
Rps21	9.07888e-08	0.143736	1	0.995	0.00185318	0.00144817	gene_expression
Snx16	2.7628e-10	0.143652	0.498	0.217	5.63943e-06	4.49176e-06	gene_expression
Nap1l3	2.08953e-09	0.143627	0.647	0.319	4.26515e-05	3.38232e-05	Other
Atxn10	1.37982e-09	0.14351	0.655	0.324	2.81648e-05	2.23599e-05	gene_expression
Spcs1	1.92714e-07	0.143346	0.621	0.327	0.00393369	0.00306069	gene_expression
Enpp2	6.00709e-07	0.143229	0.204	0.077	0.0122617	0.00947078	Other
Tspan3	2.61127e-06	0.142896	0.774	0.469	0.0533013	0.0406967	Other
Phf6	2.7737e-09	0.142616	0.443	0.194	5.66167e-05	4.48534e-05	gene_expression
Chst2	1.51239e-07	0.14227	0.387	0.178	0.00308708	0.00240545	gene_expression
Dnaja2	4.6961e-07	0.141911	0.689	0.388	0.00958567	0.00741889	gene_expression
Pfdn4	6.65994e-10	0.141646	0.511	0.226	1.35943e-05	1.08064e-05	energy
Gm10036	5.39219e-14	0.14143	0.145	0.016	1.10065e-09	8.84103e-10	Other
Nell1	7.11491e-07	0.141338	0.477	0.252	0.014523	0.0112038	gene_expression
Eps15	2.15312e-08	0.141019	0.528	0.255	0.000439495	0.000345769	morphology
Usp51	2.40388e-13	0.140511	0.306	0.087	4.90679e-09	3.93875e-09	Other
Ipo7	9.99289e-09	0.140411	0.485	0.23	0.000203975	0.000160936	Other
Paics	6.97896e-10	0.140226	0.391	0.157	1.42454e-05	1.13213e-05	gene_expression
Trappc6b	2.45783e-06	0.139653	0.834	0.499	0.0501692	0.0383298	gene_expression
C1qbp	1.38083e-09	0.139286	0.506	0.228	2.81856e-05	2.2375e-05	energy
Rps16	1.19125e-07	0.138984	1	0.995	0.00243158	0.00189742	gene_expression
Dpy30	2.6534e-12	0.138584	0.409	0.146	5.41613e-08	4.33911e-08	gene_expression
Sucla2	2.57689e-09	0.138473	0.583	0.273	5.25996e-05	4.16761e-05	energy
Rala	1.77765e-09	0.138042	0.498	0.218	3.62853e-05	2.87854e-05	gene_expression
Ggct	1.1209e-11	0.137974	0.281	0.085	2.28798e-07	1.83077e-07	Other
Eif4a2	1.20968e-06	0.137955	1	0.978	0.024692	0.0189751	gene_expression
Cdr2	7.75448e-11	0.137499	0.243	0.071	1.58284e-06	1.26313e-06	Other
2010005H15Rik	1.4633e-07	0.137441	0.209	0.075	0.00298689	0.00232811	Other
Sec22a	1.74068e-10	0.137397	0.247	0.075	3.55307e-06	2.83243e-06	Other
Rprm	4.12796e-08	0.137321	0.451	0.22	0.000842598	0.000661175	Other
Cisd1	3.26152e-07	0.137083	0.634	0.343	0.00665742	0.00516169	energy
Ptcd3	1.15051e-10	0.137055	0.319	0.111	2.34842e-06	1.87326e-06	gene_expression
Snx2	7.25502e-09	0.136834	0.383	0.164	0.000148089	0.000116987	morphology
Glra3	1.56561e-07	0.136624	0.434	0.212	0.00319572	0.00248947	Other
Arfgef1	2.13513e-08	0.136266	0.506	0.239	0.000435822	0.000342902	gene_expression
Ndufa1	3.7967e-07	0.136099	0.685	0.361	0.00774983	0.00600335	energy
Txndc15	3.69852e-08	0.135579	0.451	0.212	0.000754943	0.000592651	Other
Nop10	5.93264e-07	0.135381	0.8	0.451	0.0121097	0.00935517	gene_expression
Rheb	9.60403e-07	0.135264	0.728	0.406	0.0196037	0.0150956	Other
Dstn	6.3563e-07	0.135153	0.791	0.457	0.0129745	0.0100175	Other
Mrps21	9.83885e-08	0.134264	0.647	0.331	0.00200831	0.00156831	energy
Cfap36	8.07704e-10	0.13422	0.506	0.223	1.64868e-05	1.30985e-05	Other
Htatsf1	2.092e-10	0.133824	0.37	0.141	4.27019e-06	3.40285e-06	gene_expression
Plcb1	2.23499e-06	0.133375	0.464	0.252	0.0456205	0.0348859	gene_expression
Specc1	7.79391e-09	0.133334	0.409	0.177	0.000159089	0.000125638	Other
Stk19	8.62154e-07	0.132979	0.515	0.274	0.0175983	0.0135574	Other
Sacm1l	4.2403e-09	0.132844	0.477	0.212	8.6553e-05	6.85021e-05	gene_expression
H3f3a	7.69831e-07	0.132664	0.74	0.421	0.0157138	0.0121125	gene_expression
Taf9b	5.50198e-10	0.132477	0.302	0.106	1.12306e-05	8.93136e-06	Other
Ryr3	1.43431e-10	0.13235	0.281	0.091	2.92772e-06	2.33434e-06	synapse_excitability
Wnk3	7.24541e-08	0.132155	0.443	0.205	0.00147893	0.00115745	synapse_excitability
Krtcap2	9.55918e-08	0.132071	0.643	0.323	0.00195122	0.00152412	Other
Pak1ip1	1.13078e-09	0.131406	0.391	0.159	2.30814e-05	1.8331e-05	gene_expression
Mfn2	1.79426e-07	0.131303	0.664	0.361	0.00366245	0.00285126	energy
Cap2	6.73032e-11	0.131192	0.506	0.209	1.37379e-06	1.09677e-06	Other
Cobl	3.30977e-10	0.131115	0.349	0.132	6.7559e-06	5.37969e-06	morphology
Rnf11	2.50836e-06	0.131023	0.987	0.825	0.0512007	0.0391054	Other
Tmem50b	2.65805e-06	0.13091	0.596	0.335	0.0542561	0.0414177	gene_expression
Kcnb1	2.50205e-06	0.13082	0.57	0.318	0.0510719	0.0390145	synapse_excitability
Cnih1	8.36425e-09	0.130737	0.583	0.283	0.000170731	0.000134815	Other
BC003331	2.55299e-09	0.130651	0.413	0.177	5.21116e-05	4.12946e-05	Other
Ezr	2.6316e-08	0.130221	0.149	0.039	0.000537162	0.00042224	morphology
Unc13c	1.71808e-08	0.13019	0.14	0.034	0.000350694	0.000276164	synapse_excitability
Myo9a	1.94739e-07	0.129597	0.502	0.254	0.00397502	0.00309207	Other
Agtpbp1	1.95753e-07	0.129489	0.587	0.303	0.0039957	0.00310796	gene_expression
Ap4s1	6.96044e-08	0.129458	0.434	0.204	0.00142076	0.00111228	gene_expression
Rcn1	1.26146e-07	0.129332	0.494	0.25	0.0025749	0.00200837	gene_expression
Tmem150c	1.90935e-08	0.129184	0.421	0.189	0.000389736	0.000306756	Other
Ublcp1	3.97404e-09	0.129122	0.336	0.133	8.1118e-05	6.42085e-05	gene_expression
Commd3	2.32166e-09	0.129008	0.434	0.186	4.73897e-05	3.75621e-05	gene_expression
Pim3	7.00952e-09	0.128899	0.315	0.124	0.000143078	0.000113064	Other
Ralgps2	7.14556e-09	0.128822	0.536	0.252	0.000145855	0.000115244	Other
Pwwp2a	9.35648e-09	0.128775	0.357	0.149	0.000190984	0.000150733	Other
Lhfpl3	1.13814e-10	0.128754	0.409	0.161	2.32317e-06	1.85323e-06	Other
Ppid	4.83667e-10	0.128714	0.409	0.162	9.87261e-06	7.85427e-06	gene_expression
Nhs	8.84331e-11	0.128698	0.323	0.112	1.8051e-06	1.44022e-06	Other
Ncor1	1.6991e-06	0.128557	0.838	0.499	0.0346819	0.0265739	Other
Ncam2	2.37888e-10	0.127957	0.387	0.151	4.85576e-06	3.86805e-06	Other
Kif2a	7.65881e-08	0.127882	0.583	0.294	0.00156332	0.00122288	gene_expression
Gm26782	8.44748e-08	0.127624	0.574	0.299	0.0017243	0.00134822	Other
D3Ertd751e	5.93183e-10	0.12755	0.315	0.114	1.2108e-05	9.62617e-06	Other
Tpd52l1	1.31092e-09	0.127275	0.319	0.119	2.67586e-05	2.12462e-05	gene_expression
Stk39	7.19242e-09	0.127207	0.396	0.167	0.000146812	0.000115985	synapse_excitability
Dnajc15	3.52845e-10	0.126941	0.519	0.228	7.20228e-06	5.73409e-06	energy
Bcap29	6.31217e-08	0.126903	0.468	0.22	0.00128844	0.00100906	Other
Htr7	1.682e-09	0.126878	0.213	0.064	3.43329e-05	2.72416e-05	synapse_excitability
Cript	3.23503e-07	0.126727	0.523	0.265	0.00660334	0.00512041	synapse_excitability
Taf11	1.81089e-08	0.126362	0.443	0.197	0.000369638	0.000291028	Other
Psmc6	3.92904e-08	0.126278	0.549	0.268	0.000801995	0.00062951	gene_expression
Phkb	4.7847e-11	0.126268	0.264	0.08	9.76653e-07	7.80193e-07	Other
Manea	4.07257e-10	0.125823	0.336	0.124	8.31294e-06	6.6159e-06	gene_expression
Cct8	1.15251e-07	0.125645	0.626	0.323	0.0023525	0.00183606	gene_expression
Exoc5	5.46431e-08	0.125434	0.557	0.274	0.00111538	0.000874345	Other
Tmeff1	3.82028e-10	0.125071	0.498	0.212	7.79795e-06	6.20719e-06	Other
Bbip1	2.31268e-12	0.124641	0.464	0.177	4.72064e-08	3.78308e-08	Other
Gtf2h5	7.06825e-08	0.124413	0.638	0.331	0.00144277	0.00112936	Other
Hars	6.06633e-09	0.124058	0.417	0.177	0.000123826	9.79045e-05	gene_expression
Armcx4	2.62813e-08	0.123486	0.468	0.217	0.000536453	0.000421709	Other
Pcbd1	1.14718e-06	0.12313	0.719	0.406	0.0234163	0.0180004	Other
Hspa12a	1.04023e-08	0.12275	0.523	0.244	0.000212332	0.000167477	Other
Ryr2	7.45656e-08	0.122744	0.502	0.244	0.00152203	0.00119081	synapse_excitability
Mpc1	6.69375e-09	0.122605	0.6	0.283	0.000136633	0.000107984	energy
Dlat	9.56673e-08	0.121702	0.523	0.26	0.00195276	0.00152522	energy
Lrrtm2	5.27222e-10	0.121601	0.502	0.215	1.07617e-05	8.55945e-06	Other
Ret	7.2746e-09	0.121569	0.255	0.09	0.000148489	0.000117281	Other
Lancl3	3.54714e-11	0.121076	0.174	0.037	7.24042e-07	5.78716e-07	Other
Mfap1a	6.02575e-09	0.120907	0.306	0.117	0.000122998	9.72556e-05	Other
Macrod2	2.2736e-08	0.120858	0.566	0.27	0.000464087	0.000365049	gene_expression
Elovl5	2.11395e-10	0.120684	0.349	0.128	4.315e-06	3.43835e-06	gene_expression
Vps13b	6.26185e-09	0.120667	0.349	0.14	0.000127817	0.000101047	Other
Ppa2	5.15123e-10	0.120523	0.234	0.071	1.05147e-05	8.36456e-06	gene_expression
Wdr89	2.2248e-09	0.120496	0.498	0.217	4.54126e-05	3.60061e-05	Other
Cntnap4	2.04057e-08	0.120233	0.545	0.263	0.000416521	0.000327756	Other
Pitpnc1	2.20955e-06	0.120216	0.583	0.318	0.0451014	0.0344911	Other
Mthfd2l	6.6806e-10	0.120182	0.387	0.152	1.36364e-05	1.08393e-05	energy
H2-Q2	1.17553e-08	0.120104	0.234	0.08	0.000239949	0.000189178	Other
Fam91a1	3.08823e-09	0.119269	0.562	0.26	6.3037e-05	4.99244e-05	gene_expression
Pstk	9.68116e-09	0.118824	0.438	0.196	0.000197612	0.000155925	Other
Nuak1	1.49951e-07	0.118627	0.379	0.172	0.00306079	0.00238526	Other
Wwp1	3.48948e-08	0.118414	0.277	0.108	0.000712272	0.000559363	synapse_excitability
Pard3	1.87436e-08	0.118363	0.362	0.152	0.000382594	0.000301153	morphology
Rpl35a	9.87108e-07	0.118287	1	0.998	0.0201489	0.0155104	gene_expression
Tnr	5.65183e-09	0.118143	0.298	0.109	0.000115365	9.12319e-05	morphology
Gm15446	4.1124e-13	0.11811	0.123	0.011	8.39422e-09	6.73487e-09	Other
Wrnip1	1.02972e-08	0.117655	0.413	0.178	0.000210187	0.000165796	gene_expression
Zc3h14	2.1678e-10	0.117608	0.46	0.188	4.42492e-06	3.52572e-06	gene_expression
Zfp946	7.24555e-13	0.117102	0.187	0.035	1.47896e-08	1.1861e-08	Other
Zfp385b	9.2304e-10	0.116166	0.319	0.117	1.88411e-05	1.49662e-05	Other
Klhl7	1.1796e-07	0.116046	0.6	0.302	0.0024078	0.00187899	gene_expression
Gm2000	8.74006e-08	0.116024	0.494	0.238	0.00178402	0.00139448	Other
Clstn2	1.86087e-06	0.115829	0.281	0.125	0.0379842	0.0290873	synapse_excitability
Diaph3	1.9736e-09	0.115733	0.221	0.067	4.02852e-05	3.19487e-05	morphology
Ufc1	7.29734e-08	0.115701	0.434	0.202	0.00148953	0.00116568	Other
Pdcd10	6.97165e-07	0.115281	0.328	0.149	0.0142305	0.0109824	Other
Nipsnap2	5.09775e-08	0.114865	0.434	0.199	0.00104055	0.000815844	energy
Stt3b	2.02047e-08	0.11479	0.345	0.144	0.000412418	0.000324547	gene_expression
Bnip3	1.02418e-08	0.114632	0.434	0.191	0.000209056	0.000164914	energy
Fabp5	1.87766e-06	0.114598	0.574	0.3	0.0383268	0.0293441	Other
Mrpl33	7.84535e-07	0.114475	0.596	0.318	0.0160139	0.0123423	energy
Scn8a	3.63056e-07	0.114196	0.63	0.332	0.0074107	0.0057421	synapse_excitability
Bex4	1.46393e-06	0.114036	0.664	0.358	0.0298817	0.0229207	Other
Tmem164	6.32606e-10	0.113871	0.23	0.069	1.29128e-05	1.02653e-05	Other
Hcrtr1	8.65819e-08	0.11382	0.17	0.051	0.00176731	0.0013815	Other
BC005561	1.41575e-08	0.113642	0.57	0.266	0.000288983	0.000227681	Other
Nyap1	1.10771e-06	0.113485	0.681	0.382	0.0226106	0.017391	morphology
Uba3	5.96163e-11	0.113248	0.421	0.161	1.21689e-06	9.71805e-07	gene_expression
Aig1	1.05335e-08	0.113162	0.545	0.255	0.00021501	0.000169568	Other
Scd1	1.43441e-08	0.112767	0.174	0.05	0.000292791	0.000230639	Other
Tmem167	9.40972e-09	0.112269	0.498	0.223	0.000192071	0.000151581	Other
Galnt14	2.50433e-08	0.112173	0.23	0.079	0.000511184	0.00040197	gene_expression
Trim32	1.73288e-06	0.112055	0.694	0.392	0.0353716	0.0270953	gene_expression
Clmp	2.66745e-07	0.111803	0.481	0.236	0.00544479	0.00422657	Other
2810001G20Rik	4.84306e-08	0.111794	0.332	0.138	0.000988566	0.000775229	Other
Dlx6	3.49744e-09	0.111739	0.345	0.135	7.13897e-05	5.65221e-05	synapse_excitability
Nmd3	1.30475e-09	0.111673	0.306	0.111	2.66326e-05	2.11474e-05	gene_expression
Nyap2	3.29021e-10	0.111513	0.277	0.091	6.71598e-06	5.34824e-06	morphology
Tmem237	3.38448e-08	0.111508	0.391	0.17	0.000690839	0.000542599	Other
Rgs19	8.52638e-08	0.111351	0.294	0.119	0.0017404	0.00136064	Other
Pam16	1.41596e-08	0.111198	0.468	0.213	0.000289025	0.0002277	energy
Zrsr1	6.15463e-07	0.110929	0.557	0.283	0.0125628	0.00970154	Other
Mal2	1.51545e-07	0.110768	0.477	0.23	0.00309334	0.00241003	Other
4833439L19Rik	2.26373e-06	0.110758	0.587	0.316	0.0462073	0.0353301	Other
Haus2	1.42351e-09	0.110748	0.332	0.125	2.90567e-05	2.30637e-05	Other
Robo2	1.65485e-08	0.110648	0.213	0.069	0.000337788	0.000266017	synapse_excitability
Rpl27-ps3	4.76065e-09	0.11061	0.328	0.125	9.71743e-05	7.68845e-05	Other
Lrrcc1	6.50988e-08	0.110596	0.34	0.144	0.0013288	0.0010406	Other
Gskip	3.34292e-08	0.110437	0.409	0.181	0.000682358	0.000536038	gene_expression
Adss	2.60939e-08	0.110061	0.468	0.215	0.000532628	0.000418728	gene_expression
Mast4	5.21993e-07	0.109904	0.626	0.331	0.0106549	0.00824123	Other
Nus1	5.5079e-07	0.10985	0.613	0.321	0.0112427	0.00869202	Other
Tomm5	2.88306e-06	0.109764	0.732	0.413	0.058849	0.0448979	energy
Yae1d1	6.09156e-08	0.109391	0.374	0.165	0.00124341	0.000973918	gene_expression
Dock7	2.32241e-07	0.108877	0.417	0.196	0.0047405	0.00368288	morphology
Cklf	3.61419e-08	0.108778	0.251	0.091	0.000737728	0.000579246	Other
Grsf1	8.08744e-08	0.108635	0.57	0.273	0.00165081	0.001291	gene_expression
Rims2	2.14847e-07	0.108633	0.609	0.319	0.00438546	0.00340962	Other
B3galt6	4.29345e-09	0.108145	0.281	0.101	8.7638e-05	6.93565e-05	gene_expression
Hspa9	8.50028e-07	0.107902	0.643	0.347	0.0173508	0.0133675	gene_expression
Stum	3.7236e-08	0.107747	0.374	0.165	0.000760062	0.000596633	Other
Fbn2	2.72817e-07	0.107717	0.145	0.042	0.00556873	0.00432223	Other
Acp2	2.29551e-07	0.107644	0.604	0.303	0.00468559	0.00364159	Other
Gadd45a	1.25427e-11	0.107628	0.187	0.04	2.56021e-07	2.04822e-07	Other
Fat3	1.67723e-06	0.107396	0.409	0.207	0.0342356	0.0262386	Other
Tipin	3.55984e-10	0.107256	0.234	0.069	7.26635e-06	5.78475e-06	gene_expression
Arxes1	8.63405e-09	0.107072	0.447	0.193	0.000176238	0.000139129	Other
Dock3	1.75365e-07	0.106658	0.626	0.323	0.00357956	0.00278708	Other
Ndufb6	3.07765e-07	0.106551	0.506	0.252	0.00628209	0.00487284	energy
Zfyve9	2.79969e-06	0.106461	0.315	0.148	0.0571473	0.0436164	Other
Pcdh20	9.91914e-08	0.106293	0.511	0.257	0.00202469	0.00158091	gene_expression
Cstf2	9.77554e-08	0.106058	0.549	0.263	0.00199538	0.00155832	Esr1-TF
Cthrc1	2.31047e-07	0.105239	0.187	0.063	0.00471614	0.00366487	Other
Mrps36	2.36291e-07	0.105203	0.421	0.196	0.00482317	0.00374686	energy
Slc35e3	7.42312e-08	0.105161	0.481	0.225	0.00151521	0.00118555	Other
Ajap1	4.85561e-07	0.105084	0.251	0.103	0.00991126	0.00766749	Other
Fxr2	1.42521e-06	0.104808	0.57	0.291	0.0290914	0.0223174	gene_expression
Lrrn3	4.3158e-07	0.104705	0.528	0.265	0.00880941	0.00681983	Other
Tax1bp1	3.9534e-08	0.104466	0.46	0.21	0.000806968	0.000633334	Other
Exoc4	2.22919e-09	0.104454	0.472	0.205	4.55021e-05	3.60749e-05	gene_expression
Tbc1d30	7.19044e-07	0.104361	0.353	0.164	0.0146771	0.0113213	Other
Miga1	4.38455e-07	0.104247	0.634	0.327	0.00894975	0.00692759	Other
Fgd5	5.99148e-08	0.104189	0.136	0.034	0.00122298	0.000958097	Other
Jmjd1c	1.23612e-08	0.10407	0.596	0.279	0.000252318	0.00019888	Other
Glrx5	1.23435e-06	0.103954	0.711	0.403	0.0251955	0.0193533	energy
Actr10	3.23044e-07	0.10371	0.723	0.363	0.00659397	0.00511346	gene_expression
Pou6f2	4.15604e-07	0.103282	0.145	0.042	0.00848331	0.00656863	Esr1-TF
Gm11837	2.59989e-08	0.103209	0.174	0.05	0.000530689	0.000417256	Other
Erg28	1.3761e-07	0.102914	0.468	0.223	0.0028089	0.00218993	Other
Cmpk2	1.07456e-08	0.102585	0.311	0.119	0.000219339	0.000172971	energy
Zadh2	4.24556e-10	0.102084	0.157	0.034	8.66604e-06	6.89564e-06	Other
5930430L01Rik	4.22204e-07	0.102082	0.196	0.069	0.00861802	0.0066725	Other
Fam69a	3.15186e-09	0.101597	0.23	0.072	6.43358e-05	5.09467e-05	Other
Med30	5.89324e-08	0.101441	0.209	0.071	0.00120293	0.000942565	Other
Zfp74	1.93362e-08	0.101424	0.174	0.05	0.000394691	0.000310637	Esr1-TF
Cbx4	7.08858e-10	0.101308	0.302	0.108	1.44692e-05	1.14984e-05	Other
Plekha7	1.00847e-08	0.101103	0.234	0.079	0.000205849	0.000162404	Other
Tnxb	1.19925e-08	0.100721	0.102	0.016	0.000244791	0.000192972	Other
Ufm1	1.51399e-09	0.100626	0.285	0.1	3.09035e-05	2.45281e-05	Other
Lsm5	4.64102e-08	0.100593	0.37	0.161	0.000947324	0.000743073	gene_expression
B230334C09Rik	7.9302e-07	0.100268	0.498	0.257	0.0161871	0.012475	Other
Pnma3	3.10039e-06	0.10005	0.672	0.38	0.0632852	0.0482576	Other

## Sheet: P50FvsEsr1KOF_Vgathormone_low
	p_val	avg_logFC	pct.1	pct.2	p_val_adjust
mt-Atp6	1.16624e-33	2.12067	1	1	1.68638e-29
mt-Co2	2.4911e-33	1.811	1	0.99	3.60188e-29
mt-Nd1	3.81869e-32	1.70418	1	1	5.52067e-28
mt-Nd4	4.15317e-31	1.69544	1	0.99	6.00341e-27
mt-Nd3	6.1167e-26	1.60857	0.958	0.792	8.83434e-22
mt-Nd2	1.8131e-32	1.51671	1	0.98	2.62137e-28
Gm26699	3.39018e-15	1.43493	0.677	0.198	4.87203e-11
mt-Co3	6.6225e-31	1.40668	1	1	9.57216e-27
mt-Cytb	7.42219e-29	1.33055	1	0.99	1.07258e-24
Pgrmc1	1.13917e-21	1.29512	0.938	0.703	1.64348e-17
Ube3a	2.21445e-24	1.23199	1	0.99	3.19744e-20
mt-Nd5	1.5219e-15	1.17805	0.865	0.723	2.18727e-11
Tmem255a	1.51235e-08	1.1188	0.594	0.287	0.00021309
Ogt	2.12682e-16	1.08259	0.885	0.762	3.05858e-12
Gm47283	1.73013e-09	1.08053	0.521	0.178	2.45091e-05
Rsrp1	4.97564e-16	1.04668	0.927	0.802	7.15398e-12
Rbm4b	1.00393e-10	1.03655	0.75	0.525	1.4286e-06
Gabrg2	5.34175e-10	1.01332	0.646	0.366	7.58369e-06
Itfg1	4.71769e-11	0.995381	0.74	0.554	6.72412e-07
Zfhx3	3.23778e-06	0.97072	0.354	0.099	0.0444968
Fut9	1.28598e-07	0.968224	0.646	0.455	0.00179909
mt-Co1	2.26881e-29	0.962269	1	1	3.27888e-25
Serinc1	4.45615e-15	0.952669	0.906	0.881	6.40304e-11
Kcnq1ot1	9.12795e-12	0.935224	0.844	0.723	1.30356e-07
5330434G04Rik	8.93069e-07	0.9326	0.604	0.396	0.012377
Xist	1.52535e-14	0.902839	0.99	0.99	2.19025e-10
Gabra1	8.36357e-09	0.892693	0.76	0.564	0.000117985
Fam8a1	1.07936e-06	0.880184	0.552	0.327	0.0149416
Pcdh17	3.75104e-10	0.861221	0.875	0.832	5.33023e-06
Igf2bp3	1.27701e-07	0.858369	0.625	0.465	0.00178692
Ttc14	2.83887e-10	0.848871	0.812	0.703	4.03546e-06
Atp6ap2	3.61562e-07	0.838072	0.698	0.554	0.00503728
Tmem30a	2.79528e-08	0.819396	0.74	0.614	0.000393184
Tmx2	1.93211e-08	0.764951	0.74	0.703	0.000272041
Ly6h	5.67681e-11	0.759932	0.927	0.881	8.08775e-07
Scamp1	4.11019e-08	0.757428	0.729	0.653	0.000577277
Rtn4	5.36597e-08	0.74913	0.812	0.723	0.000752952
Gria2	4.24443e-10	0.740618	0.938	0.941	6.02836e-06
Tmx4	5.16228e-09	0.723247	0.854	0.842	7.29326e-05
Slc12a5	2.27657e-08	0.713337	0.833	0.881	0.000320404
Cpe	3.52362e-07	0.712743	0.76	0.802	0.00490981
Reep5	2.00651e-08	0.689763	0.844	0.851	0.000282497
Atp2a2	7.17103e-07	0.677352	0.771	0.782	0.00994981
Gpm6a	4.11665e-13	0.67198	0.979	0.97	5.89752e-09
Prnp	2.73481e-06	0.654873	0.729	0.743	0.0376201
App	1.62288e-08	0.646209	0.875	0.96	0.000228599
Nrxn1	4.89615e-07	0.590083	0.812	0.693	0.0068076
Snrnp70	2.63935e-06	0.58899	0.812	0.812	0.0363174
Cntn1	2.2703e-06	0.579309	0.865	0.901	0.0312733
Canx	6.46405e-08	0.578391	0.917	0.921	0.000906648
Atp1b1	2.16882e-07	0.572518	0.969	0.941	0.00302854
Ncam1	1.44281e-06	0.561763	0.99	0.98	0.0199324
Clstn1	4.24519e-08	0.558119	0.885	0.891	0.00059611
Meg3	2.60625e-19	0.503714	1	1	3.75717e-15
Snhg11	1.87309e-07	0.343322	1	1	0.0026169

## Sheet: P50MvsEsr1KOM_Vgathormone_low
	p_val	avg_logFC	pct.1	pct.2	p_val_adjust
Fam19a1	2.90193e-06	1.51245	0.347	0.031	0.0374
Penk	2.62774e-06	1.27221	0.469	0.109	0.0338873
Grm1	1.4974e-10	1.23859	0.541	0.031	1.94497e-06
Spon1	3.21308e-06	1.18743	0.286	0	0.0413942
Abat	2.64764e-10	1.18241	0.5	0.016	3.43876e-06
2900055J20Rik	3.58421e-07	1.15056	0.459	0.062	0.00463976
Meg3	5.06214e-24	1.13126	1	1	6.57977e-20
Frmpd3	1.2226e-06	1.11608	0.306	0	0.0158008
Mpped2	1.59566e-08	1.09855	0.429	0.016	0.000206925
Gm47283	2.05504e-08	1.09532	0.388	0	0.000266457
Mir124-2hg	6.97565e-09	1.08851	0.408	0	9.04952e-05
Timm9	3.59342e-11	1.06375	0.612	0.047	4.66785e-07
Cplx1	1.63708e-07	1.04583	0.418	0.031	0.0021205
Cadm2	2.47175e-06	1.02238	0.449	0.078	0.0318807
Pid1	2.33445e-08	1.00511	0.459	0.031	0.000302662
Slc6a1	4.00953e-09	0.996031	0.786	0.219	5.20357e-05
Coro6	1.98718e-06	0.978585	0.296	0	0.0256466
3110021N24Rik	9.93012e-08	0.962801	0.357	0	0.00128675
Scn8a	1.08521e-08	0.959103	0.51	0.047	0.000140741
Pou3f3	4.55397e-07	0.927916	0.327	0	0.00589283
Rpl22l1	3.62026e-08	0.923402	0.765	0.219	0.000469295
Fut9	2.09889e-06	0.922753	0.49	0.094	0.0270841
Ppt1	1.6383e-06	0.921321	0.337	0.016	0.0211538
Spock1	8.67139e-09	0.897799	0.551	0.062	0.000112485
Mirg	2.34099e-09	0.895409	0.541	0.047	3.0386e-05
Rsrp1	1.02185e-08	0.891549	0.949	0.453	0.000132534
mt-Co2	2.4135e-14	0.879697	0.99	0.969	3.13634e-10
Slc24a2	9.64518e-07	0.872932	0.418	0.047	0.0124712
Rpl28	6.31578e-09	0.866463	0.684	0.125	8.1941e-05
Cntn5	3.05528e-06	0.854454	0.327	0.016	0.0393734
St6galnac5	1.52433e-06	0.843027	0.337	0.016	0.0196913
Rps10	5.17235e-08	0.842492	0.592	0.109	0.00067044
Chl1	1.16469e-07	0.838723	0.429	0.031	0.00150909
Ube2d2a	2.55034e-07	0.831907	0.408	0.031	0.00330244
Purb	1.41322e-07	0.830148	0.52	0.078	0.00183082
Hspe1	1.71879e-06	0.826352	0.337	0.016	0.0221896
Sulf2	1.65921e-07	0.823347	0.347	0	0.00214884
Ptprd	3.38633e-08	0.815722	0.643	0.125	0.000439004
Mpc1	4.55261e-07	0.811465	0.398	0.031	0.00589153
Cacna2d2	4.01475e-09	0.805403	0.755	0.172	5.20993e-05
Dhx30	4.69806e-07	0.802587	0.52	0.094	0.00607881
Ssbp2	6.63389e-07	0.789209	0.459	0.062	0.00858226
Eif2s3y	6.4706e-08	0.788068	0.51	0.062	0.00083859
Tenm4	1.33331e-07	0.787666	0.602	0.125	0.00172744
Scn1a	1.18257e-06	0.781449	0.5	0.094	0.0152847
Usp32	7.48195e-07	0.779178	0.316	0	0.00967716
Fhl1	7.88097e-07	0.777162	0.388	0.031	0.0101925
Got2	1.88397e-07	0.773058	0.49	0.062	0.00243974
Eif5a	2.55775e-07	0.765447	0.449	0.047	0.00331177
Swi5	4.00187e-07	0.763903	0.439	0.047	0.00518001
Ogdh	1.08331e-06	0.762767	0.347	0.016	0.0140051
Ank3	1.65143e-07	0.758068	0.694	0.172	0.00213893
Dnajc27	1.25022e-06	0.743361	0.378	0.031	0.0161566
Tpt1	3.11168e-07	0.742102	0.48	0.062	0.00402838
Phactr1	3.20433e-06	0.728295	0.357	0.031	0.0412846
Gad2	1.42657e-06	0.722529	0.735	0.25	0.0184327
Tmeff2	1.89131e-06	0.721812	0.337	0.016	0.0244112
Scn2b	3.84454e-06	0.720104	0.786	0.297	0.0495062
Slc32a1	2.29986e-06	0.715461	0.612	0.156	0.0296705
Rps7	2.70106e-06	0.711246	0.694	0.219	0.0348275
Gm17018	1.62292e-06	0.692707	0.408	0.047	0.0209584
B4galt5	6.95949e-07	0.687395	0.357	0.016	0.00900279
Sirt3	1.58759e-06	0.684783	0.408	0.047	0.0205037
Cycs	4.48013e-07	0.678231	0.439	0.047	0.00579819
Rpl3	6.51649e-08	0.675677	0.959	0.422	0.000844472
Rell2	1.659e-06	0.672231	0.408	0.047	0.0214194
Slc22a23	1.98718e-06	0.668313	0.296	0	0.0256446
Atp5b	1.87853e-06	0.666482	0.48	0.078	0.024248
Ndufb10	3.05528e-06	0.66274	0.327	0.016	0.0393704
B3gat1	2.59329e-06	0.660859	0.429	0.062	0.0334456
Cox7a2l	1.53163e-07	0.659323	0.622	0.125	0.00198408
Mff	3.83756e-06	0.6572	0.357	0.031	0.0494201
Rufy3	4.29007e-07	0.651888	0.633	0.141	0.00555263
Slc25a3	2.40592e-06	0.646249	0.531	0.109	0.0310339
Psmc5	1.12662e-06	0.633585	0.418	0.047	0.0145638
Psma1	2.67254e-06	0.630471	0.633	0.172	0.0344623
mt-Nd3	7.47737e-07	0.629538	0.867	0.422	0.00967197
Rab6b	1.529e-06	0.621425	0.48	0.078	0.0197501
Uqcr11	4.79307e-07	0.61717	0.439	0.047	0.00620128
Rps2	7.92519e-07	0.613931	0.847	0.297	0.0102489
Atp5j2	2.27744e-06	0.612217	0.571	0.125	0.0293836
Ndufc2	1.85124e-06	0.605767	0.408	0.047	0.0238977
Eef1a1	1.57204e-06	0.599633	0.959	0.469	0.0203044
Igf2bp3	2.87399e-06	0.597967	0.612	0.156	0.0370457
Pclo	3.23188e-06	0.586652	0.5	0.094	0.0416298
Elavl4	8.70355e-07	0.577608	0.429	0.047	0.0112546
Atp5g1	1.63386e-06	0.574276	0.449	0.062	0.021098
mt-Atp6	5.01856e-09	0.573353	0.99	1	6.51158e-05
Ddhd2	3.22558e-06	0.572127	0.398	0.047	0.0415519
Sncb	2.8841e-06	0.563476	0.439	0.062	0.0371732
Gabarapl1	2.10647e-06	0.563134	0.694	0.188	0.0271798
Ndufa4	2.37841e-06	0.562514	0.663	0.172	0.0306815
Cdc37l1	1.49771e-06	0.547789	0.48	0.078	0.0193489
Polr2m	2.75895e-06	0.544949	0.5	0.094	0.0355712
Snhg11	2.27627e-09	0.541019	1	1	2.95483e-05
Cisd2	2.81128e-06	0.533105	0.531	0.109	0.0362402
Sdha	3.41046e-06	0.530693	0.469	0.078	0.0439268
Cisd1	3.80198e-06	0.52596	0.673	0.188	0.0489657
2010107E04Rik	1.02133e-06	0.520403	0.459	0.062	0.0132048
Smim10l1	3.14598e-06	0.508615	0.469	0.078	0.040536
Eef2	2.76203e-06	0.490924	0.714	0.203	0.035608
Psmd7	1.153e-06	0.367898	0.52	0.094	0.0149036
