# Supplementary material for: Esr1-dependent signaling and transcriptional maturation in the medial preoptic area of the hypothalamus shape the development of mating behavior during adolescence
Source: eLife. 2026 Jun 19;14:RP106347. doi: 10.7554/eLife.106347 (PMC13282117; doi:10.7554/eLife.106347)
Supplement: Supplementary file 10. [file elife-106347-supp10.xlsx]

## Sheet: female_branch1
	p_val	avg_logFC	pct.1	pct.2	p_val_adjust
Nts	1.42993e-34	0.977764	0.699	0.26	2.43059e-30
Pcp4	5.31754e-43	0.758218	1	0.963	9.04247e-39
Esr1	2.70766e-40	0.725204	0.908	0.385	4.60411e-36
Spock3	2.05336e-39	0.703178	0.908	0.422	3.49113e-35
Rprm	1.48353e-32	0.698074	0.503	0.124	2.52111e-28
Fgfr1	3.46521e-20	0.657714	0.734	0.356	5.87665e-16
Tmem35a	1.00699e-32	0.65401	0.711	0.268	1.71148e-28
Pcdh7	5.69404e-31	0.619878	0.971	0.585	9.6753e-27
Tpt1	1.27776e-36	0.608196	0.994	0.8	2.17219e-32
Rps27rt	1.01439e-29	0.601575	0.913	0.513	1.72334e-25
Chl1	2.08385e-31	0.600802	0.936	0.52	3.54108e-27
Spon1	2.67955e-17	0.590024	0.405	0.137	4.53863e-13
Pdzrn4	2.27398e-28	0.551556	0.775	0.319	3.86259e-24
Rpl22l1	8.82753e-46	0.5469	1	0.977	1.50121e-41
Drp2	1.73482e-39	0.54508	0.613	0.144	2.94972e-35
Nrp1	8.36048e-38	0.538342	0.624	0.154	1.42136e-33
Fstl5	1.27439e-21	0.532667	0.757	0.385	2.16226e-17
Lypd6	1.06794e-23	0.505268	0.543	0.174	1.81304e-19
Ecel1	2.27793e-23	0.500527	0.879	0.457	3.86679e-19
Pou2f2	1.08409e-18	0.48626	0.85	0.432	1.83775e-14
Gda	9.83413e-17	0.485971	0.769	0.403	1.66511e-12
Nrip1	1.35909e-26	0.485544	0.468	0.123	2.30786e-22
mt-Atp6	3.39324e-36	0.484684	1	1	5.76817e-32
Pip4k2a	6.96778e-29	0.482155	0.462	0.111	1.18362e-24
Apoc3	6.50228e-30	0.47726	0.486	0.109	1.1048e-25
Nrsn1	2.61782e-29	0.465206	0.994	0.887	4.44716e-25
Mrap2	6.2401e-19	0.464706	0.584	0.243	1.05801e-14
Mef2c	8.33364e-19	0.463572	0.457	0.154	1.4128e-14
Penk	4.4125e-07	0.463086	0.41	0.217	0.00735123
Olfm3	4.29316e-21	0.460623	0.636	0.251	7.28248e-17
Ntng1	3.92027e-17	0.455855	0.896	0.545	6.63858e-13
mt-Co2	5.55031e-34	0.450886	1	0.996	9.43387e-30
Coch	1.02408e-27	0.450165	0.434	0.099	1.7393e-23
Unc5d	3.983e-19	0.450008	0.89	0.561	6.75437e-15
Rps12	1.01485e-32	0.449638	1	0.973	1.72475e-28
Nos1	1.70061e-17	0.446945	0.572	0.239	2.88083e-13
Serpini1	2.71869e-17	0.432374	0.676	0.32	4.60464e-13
Mafa	3.1245e-27	0.430736	0.272	0.033	5.30633e-23
Vat1l	6.79645e-16	0.427737	0.936	0.672	1.15044e-11
Lrp1b	7.33629e-16	0.427595	0.884	0.554	1.24174e-11
Rpl39	3.00686e-26	0.40326	1	0.967	5.10566e-22
Eef1b2	3.77236e-18	0.401393	0.942	0.716	6.3934e-14
Neo1	7.47754e-16	0.400747	0.543	0.233	1.26557e-11
2010005H15Rik	2.3228e-21	0.398044	0.543	0.178	3.9404e-17
Pak3	2.71972e-20	0.394495	0.977	0.86	4.61264e-16
Wnt4	2.42574e-28	0.389119	0.399	0.08	4.12011e-24
Rps24	7.74562e-30	0.380661	1	0.992	1.31598e-25
Ptpro	5.07189e-18	0.380267	0.827	0.449	8.59533e-14
Nell1	2.57236e-17	0.378635	0.711	0.328	4.35732e-13
mt-Nd4	4.75806e-26	0.378167	1	0.992	8.0787e-22
Nectin3	5.29548e-19	0.376934	0.41	0.125	8.97902e-15
mt-Nd1	4.27537e-27	0.37095	1	1	7.26043e-23
Rpl30	2.0364e-21	0.368659	0.994	0.952	3.45475e-17
Rpl12	1.43143e-17	0.36531	0.994	0.9	2.42512e-13
Gad2	9.7232e-18	0.363381	1	0.877	1.6475e-13
Pgr	5.98796e-18	0.361513	0.63	0.254	1.01472e-13
Gabrg1	8.00607e-16	0.358084	0.711	0.366	1.35495e-11
Ppp1r17	6.16667e-18	0.355227	0.376	0.105	1.04494e-13
Rpl23	1.13924e-23	0.354782	1	0.995	1.93398e-19
Rpl9-ps6	9.83378e-23	0.351987	0.52	0.16	1.66909e-18
Ddc	7.49067e-19	0.347068	0.376	0.1	1.26997e-14
Rps10	2.56445e-18	0.346911	1	0.962	4.34649e-14
Lrfn5	1.39498e-12	0.346563	0.954	0.652	2.35682e-08
Efna5	2.92526e-11	0.343669	0.873	0.572	4.9352e-07
Wdr89	3.89905e-17	0.342897	0.624	0.261	6.60304e-13
mt-Nd3	1.58179e-14	0.33663	0.954	0.823	2.67497e-10
Slc18a2	3.8892e-10	0.33005	0.422	0.181	6.54746e-06
Tmcc3	2.2838e-10	0.326997	0.711	0.422	3.84752e-06
Scml4	1.40188e-21	0.32697	0.393	0.099	2.37843e-17
Rasgrf1	2.26377e-13	0.321575	0.746	0.4	3.82668e-09
Rps20	7.70874e-17	0.319771	0.988	0.957	1.30532e-12
Chml	1.06724e-22	0.318291	0.347	0.074	1.81132e-18
Nexmif	9.85595e-12	0.310427	0.532	0.264	1.66369e-07
Glra3	2.78227e-11	0.310096	0.48	0.217	4.69425e-07
Dlgap1	3.04072e-10	0.308545	0.491	0.241	5.12179e-06
Vstm2a	3.59143e-09	0.304825	0.751	0.5	6.03432e-05
Vat1	1.98742e-12	0.30452	0.942	0.742	3.35736e-08
Marcks	4.02599e-11	0.303693	0.96	0.857	6.79104e-07
Rbbp7	4.36515e-11	0.302557	0.601	0.305	7.3627e-07
Maged1	1.42859e-11	0.302195	0.954	0.773	2.4109e-07
Anks1b	4.84148e-12	0.3021	0.884	0.554	8.17532e-08
Gm2000	1.95594e-13	0.301417	0.543	0.241	3.3067e-09
Rps4x	2.29906e-22	0.300581	1	0.996	3.90151e-18
Opn3	5.68125e-25	0.298499	0.254	0.032	9.64562e-21
Ly6e	5.69055e-09	0.29754	0.769	0.48	9.55444e-05
Rpl7	3.69117e-15	0.29598	0.988	0.925	6.24509e-11
Rpl5	4.81676e-12	0.295779	0.948	0.832	8.13406e-08
Gm9493	2.23019e-18	0.295758	0.422	0.132	3.78016e-14
mt-Nd2	1.69257e-17	0.294078	1	0.986	2.86738e-13
Eef1a1	4.12391e-22	0.293442	1	1	6.99787e-18
Tcp1	9.11768e-09	0.288708	0.827	0.555	0.000152958
Rpl7a	7.56289e-12	0.287921	0.983	0.895	1.27669e-07
Rps3a1	2.15633e-20	0.286225	1	0.996	3.65734e-16
Npm1	4.77548e-11	0.283649	0.954	0.859	8.05385e-07
Tead1	4.78002e-09	0.282093	0.399	0.183	8.02853e-05
Npy2r	4.46615e-11	0.281317	0.74	0.389	7.5326e-07
Ikzf2	9.72978e-21	0.278059	0.283	0.053	1.65037e-16
Ccdc85a	7.96794e-14	0.275138	0.48	0.19	1.34714e-09
Rpl22	1.15859e-09	0.274427	0.931	0.681	1.94863e-05
Arfgef3	8.47076e-07	0.271885	0.884	0.668	0.0140886
Fndc9	4.90432e-12	0.269328	0.63	0.307	8.28095e-08
Tcerg1l	1.71208e-10	0.269203	0.399	0.173	2.88537e-06
Rpl10-ps3	2.39431e-13	0.267888	0.578	0.253	4.0471e-09
Tcaf1	1.48536e-08	0.264576	0.908	0.619	0.00024905
2010107E04Rik	2.03354e-08	0.262659	0.838	0.541	0.00034078
Rplp2	1.35958e-15	0.261828	1	0.99	2.30068e-11
Pcdh20	1.78638e-07	0.26147	0.486	0.267	0.00298218
AW551984	3.38535e-09	0.26118	0.908	0.615	5.68841e-05
Meg3	5.2856e-13	0.261063	1	1	8.93373e-09
Camta1	6.3756e-11	0.260038	0.994	0.815	1.07512e-06
Rpl17	7.3304e-22	0.258679	1	1	1.24382e-17
Pgr15l	3.09778e-07	0.257387	0.509	0.279	0.00516586
Plcb4	4.3642e-07	0.257301	0.572	0.338	0.00727163
Brinp2	4.88678e-11	0.255647	0.578	0.28	8.24107e-07
Rit2	1.21429e-08	0.2554	0.809	0.512	0.000203649
Glra2	6.83578e-09	0.254848	0.526	0.276	0.000114732
Tmem255a	1.35942e-08	0.249113	0.936	0.686	0.000227961
Camk4	6.46419e-12	0.248318	0.532	0.241	1.09128e-07
Phyhipl	6.44567e-09	0.24827	0.659	0.372	0.000108197
Akap7	2.99691e-12	0.247499	0.618	0.29	5.06148e-08
Slitrk5	2.93428e-09	0.246015	0.607	0.32	4.93136e-05
Rps27a	1.21765e-15	0.244835	1	0.998	2.06063e-11
Rack1	8.84599e-07	0.243555	0.867	0.641	0.0147082
Fgf13	5.52675e-10	0.24269	0.607	0.317	9.29986e-06
Adarb2	3.02483e-12	0.241118	0.538	0.232	5.10833e-08
Rps25	1.25173e-14	0.240642	1	0.996	2.11705e-10
Rpl21	1.26552e-16	0.238949	1	1	2.14265e-12
Hspa5	7.68554e-08	0.238871	0.699	0.427	0.00128556
Elavl4	8.74296e-08	0.237194	0.89	0.662	0.00146217
Rps15a	1.15379e-12	0.23718	1	0.986	1.94945e-08
Nrcam	2.26904e-11	0.235526	0.613	0.301	3.82901e-07
Galnt13	2.63927e-11	0.235364	0.491	0.211	4.45324e-07
mt-Cytb	3.12818e-15	0.234114	1	1	5.29288e-11
Arhgef9	5.00174e-09	0.233498	0.844	0.527	8.39941e-05
A230057D06Rik	8.15826e-08	0.232782	0.642	0.364	0.00136455
Sptssa	9.66992e-09	0.232681	0.613	0.337	0.000162213
H2-Q2	6.45042e-11	0.230494	0.254	0.079	1.08767e-06
Fhad1	6.26166e-15	0.230104	0.48	0.173	1.05929e-10
Tsr2	2.95062e-09	0.230038	0.676	0.372	4.95851e-05
Prkacb	3.64168e-08	0.229937	0.994	0.914	0.000609836
Iqsec3	4.87181e-08	0.229629	0.694	0.416	0.000815492
Rtn4	2.74692e-07	0.229392	0.908	0.706	0.00458131
Eif4a2	1.10532e-07	0.228234	0.994	0.971	0.00184765
Txndc17	2.00075e-10	0.227774	0.723	0.397	3.37146e-06
Plxnc1	8.74898e-09	0.227219	0.659	0.365	0.000146782
March11	1.00014e-12	0.227217	0.272	0.079	1.68993e-08
Pid1	3.53405e-10	0.225411	0.543	0.261	5.95099e-06
Npbwr1	2.20165e-13	0.224667	0.197	0.042	3.72189e-09
Ezr	1.01264e-17	0.224631	0.243	0.045	1.71571e-13
Cacng5	6.79301e-08	0.224472	0.329	0.146	0.00113674
1190002N15Rik	8.87995e-11	0.223892	0.376	0.148	1.49698e-06
Rps2	1.66598e-12	0.222445	1	0.973	2.81451e-08
Hpcal1	2.95807e-09	0.221461	0.769	0.432	4.97074e-05
Tenm2	1.01203e-08	0.220374	0.659	0.368	0.000169757
Eif1b	9.61854e-08	0.220047	0.948	0.761	0.00160841
Trhr	8.70884e-11	0.218664	0.318	0.116	1.46822e-06
As3mt	4.54708e-15	0.214102	0.405	0.131	7.69275e-11
Eif3e	3.19555e-07	0.212736	0.815	0.554	0.00532826
Plxdc2	1.20669e-07	0.212728	0.399	0.193	0.00201638
Fgf12	2.37821e-07	0.212185	0.491	0.268	0.00396827
Mcfd2	7.6124e-09	0.211765	0.601	0.322	0.000127728
Hsph1	7.51596e-07	0.210764	0.879	0.667	0.0125035
Cxxc5	1.31504e-10	0.210389	0.422	0.174	2.2165e-06
Atp1b3	1.32523e-07	0.210296	0.711	0.432	0.00221367
Hspa8	2.30309e-07	0.209692	0.988	0.924	0.00384317
Kl	8.30816e-13	0.208945	0.249	0.064	1.40408e-08
Aldh9a1	2.24879e-10	0.208434	0.295	0.104	3.78899e-06
App	1.16024e-07	0.207649	0.988	0.918	0.00193933
Rpl31	7.83669e-13	0.207429	1	0.992	1.32448e-08
Chodl	1.97844e-08	0.207034	0.329	0.134	0.000331567
Rpl9	1.35531e-14	0.206867	1	0.999	2.29211e-10
Elovl5	2.96976e-11	0.206816	0.353	0.129	5.00998e-07
Dhx40	2.91573e-12	0.206565	0.295	0.092	4.92466e-08
Scg2	1.57334e-07	0.206556	1	0.919	0.00262732
Unc5c	7.18904e-10	0.206094	0.462	0.215	1.20948e-05
Sema3c	1.01347e-09	0.206028	0.173	0.044	1.70476e-05
Rpl23a	6.81635e-11	0.205784	1	0.995	1.14924e-06
Gabre	2.42223e-08	0.2056	0.607	0.328	0.000405821
Rps6ka6	3.34996e-10	0.205243	0.283	0.099	5.64167e-06
Fam183b	5.8102e-12	0.204798	0.329	0.11	9.80936e-08
Tmem29	9.24587e-07	0.20427	0.572	0.337	0.0153713
Rpl26	2.71408e-14	0.203367	1	1	4.58897e-10
Rmst	2.19235e-07	0.203049	0.757	0.439	0.00365903
Uqcrb	1.36308e-06	0.202937	0.717	0.458	0.0226135
Rps17	2.25901e-09	0.202884	1	0.975	3.79785e-05
Klhl7	3.70726e-07	0.202704	0.653	0.37	0.00617925
Stmn2	7.47997e-09	0.202668	1	0.93	0.000125514
Snx16	2.31166e-08	0.202343	0.555	0.283	0.000387341
Tmsb4x	3.7429e-09	0.201887	1	0.998	6.28807e-05
Slitrk1	1.72529e-08	0.201029	0.642	0.341	0.000289193
Nos1ap	2.57784e-10	0.199793	0.509	0.229	4.34237e-06
Gpbp1	4.7456e-07	0.199108	0.613	0.359	0.00790426
Bmi1	2.62431e-08	0.198526	0.382	0.173	0.000439624
Rnf152	2.91675e-06	0.197792	0.237	0.104	0.0482635
Tle4	1.79478e-07	0.19762	0.59	0.327	0.00299603
Kcnq1ot1	1.04976e-06	0.197275	0.948	0.752	0.0174418
mt-Co3	2.15868e-15	0.197087	1	1	3.65271e-11
Rps7	1.13659e-10	0.196224	1	0.994	1.91583e-06
Fndc3a	1.89094e-08	0.195846	0.85	0.527	0.000316922
Morn2	2.5438e-08	0.195088	0.532	0.267	0.000426162
Slco3a1	4.99804e-07	0.194089	0.405	0.211	0.00832274
Rgmb	1.21264e-06	0.191925	0.532	0.308	0.020131
Celf6	1.89524e-06	0.190018	0.867	0.61	0.0314023
Dlx2	1.50061e-09	0.189976	0.503	0.235	2.52342e-05
Tmem158	2.55893e-07	0.189919	0.786	0.49	0.00426881
Gm16485	3.71598e-16	0.189065	0.231	0.045	6.29041e-12
Tmem132c	4.11678e-07	0.188321	0.197	0.072	0.00686062
Scn9a	1.04727e-07	0.187935	0.555	0.3	0.00175072
Ptpn5	6.21806e-07	0.187679	0.751	0.457	0.0103481
Efnb2	6.9206e-08	0.187456	0.306	0.129	0.00115802
Cntnap4	5.50089e-07	0.187071	0.491	0.267	0.00915844
Cthrc1	4.37403e-09	0.186551	0.301	0.118	7.34705e-05
Gfra1	4.69088e-07	0.186055	0.457	0.232	0.00781359
B3glct	9.82033e-13	0.18533	0.191	0.041	1.65944e-08
Rps3	1.34746e-11	0.184011	1	0.998	2.27411e-07
Ywhah	4.23721e-07	0.183769	0.988	0.951	0.00706088
Nop56	9.93482e-07	0.18226	0.665	0.385	0.0165117
Maoa	4.31705e-07	0.181775	0.503	0.27	0.00719349
Cstf2	4.65896e-07	0.181143	0.584	0.327	0.00776089
Rplp1	7.59977e-08	0.180504	1	0.998	0.00127129
Rngtt	4.83772e-08	0.179842	0.353	0.16	0.000809835
Rps6	5.16289e-09	0.179559	1	0.996	8.66953e-05
Ptprm	4.86118e-10	0.177796	0.283	0.099	8.18185e-06
Sox4	8.01841e-07	0.17765	0.572	0.323	0.013337
Hsp90aa1	2.49008e-06	0.177339	0.977	0.887	0.0412233
Grid2	6.85059e-07	0.177258	0.584	0.337	0.0113994
Gm9866	1.17819e-09	0.1771	0.486	0.221	1.98147e-05
Rfx3	4.34555e-10	0.177005	0.41	0.166	7.31486e-06
5330434G04Rik	5.57448e-07	0.176982	0.775	0.475	0.00927983
Cd59a	1.24499e-07	0.175787	0.249	0.098	0.00208014
Rpl19	4.75246e-10	0.175722	1	0.996	7.99935e-06
Galnt14	3.94487e-10	0.175387	0.347	0.132	6.64079e-06
Ube2e1	4.1035e-07	0.174363	0.723	0.416	0.00683889
Rpl36a-ps1	3.46113e-10	0.174104	0.26	0.087	5.82854e-06
Cdh8	1.62506e-07	0.173885	0.416	0.206	0.00271336
Jmjd1c	2.98965e-06	0.173115	0.572	0.326	0.0494607
Lsamp	1.36356e-06	0.173041	0.965	0.866	0.0226201
Rpl27a	2.39323e-08	0.172929	1	0.999	0.000400986
Slit2	7.1196e-08	0.171813	0.341	0.149	0.00119111
Tubb2b	7.18398e-08	0.171646	0.474	0.235	0.00120181
Krt222	3.73249e-10	0.170557	0.295	0.106	6.28477e-06
Tln2	1.05431e-06	0.169017	0.555	0.305	0.0175163
Gfod1	1.85486e-10	0.16896	0.329	0.121	3.12581e-06
Rragd	5.89632e-10	0.168846	0.376	0.15	9.92115e-06
Sec11a	1.54691e-06	0.168607	0.399	0.203	0.0256555
Dgkd	1.54934e-08	0.167866	0.393	0.173	0.000259747
Rps13	1.31619e-06	0.167363	1	0.982	0.0218422
Foxg1	6.13695e-07	0.167138	0.676	0.388	0.0102137
Rpl29	1.29503e-06	0.166858	1	0.961	0.0214923
Rims2	2.59911e-06	0.166213	0.705	0.443	0.0430231
Hs3st5	2.21853e-07	0.166026	0.306	0.132	0.0037025
Wrnip1	6.99116e-08	0.165964	0.405	0.189	0.00116976
Pdia3	2.74801e-07	0.165714	0.532	0.288	0.00458286
Palmd	1.0706e-11	0.164613	0.197	0.047	1.80706e-07
Plekhb1	8.81177e-07	0.164523	0.468	0.252	0.0146522
Vps50	1.00445e-06	0.16422	0.503	0.268	0.0166929
Mtus1	2.51454e-07	0.164151	0.329	0.148	0.00419525
Esyt3	1.43868e-10	0.163961	0.249	0.075	2.42476e-06
Plcxd3	9.62812e-08	0.163505	0.497	0.243	0.00160992
Utrn	6.47926e-11	0.163504	0.289	0.095	1.09247e-06
Kcns2	1.17273e-07	0.162869	0.329	0.146	0.00195999
Pde1c	3.49712e-08	0.162495	0.538	0.27	0.000585663
Dock4	2.427e-09	0.162289	0.387	0.162	4.07978e-05
Maob	1.00332e-07	0.161766	0.237	0.088	0.00167746
Sccpdh	8.79345e-07	0.161593	0.613	0.348	0.0146235
Rpl35a	5.22017e-10	0.160675	1	0.999	8.78554e-06
Dhx9	3.14459e-07	0.160428	0.486	0.249	0.0052436
Whrn	3.88215e-10	0.160401	0.208	0.058	6.53599e-06
Cct4	3.47493e-07	0.160317	0.636	0.347	0.00579235
Gstm7	4.87953e-09	0.159498	0.387	0.162	8.19467e-05
St3gal1	4.34594e-08	0.158595	0.208	0.069	0.000727597
Slc25a14	1.09985e-06	0.158047	0.41	0.206	0.0182697
Tppp3	3.21231e-07	0.157994	0.52	0.286	0.00535556
Enox2	3.91662e-09	0.156929	0.231	0.078	6.57953e-05
Rps8	5.43834e-10	0.156501	1	1	9.15218e-06
Sstr1	9.44153e-15	0.155354	0.156	0.021	1.59694e-10
Zfp68	1.60402e-09	0.154948	0.295	0.107	2.69683e-05
C130060K24Rik	7.15691e-09	0.153592	0.116	0.023	0.000120114
Rps16	3.25303e-08	0.15314	1	0.996	0.000544817
Rps21	1.55772e-08	0.152325	1	0.995	0.000261136
Nanos1	1.41688e-07	0.151493	0.353	0.162	0.00236647
Ctnnbip1	1.18744e-06	0.150279	0.578	0.322	0.0197174
Syne2	2.67e-12	0.147974	0.295	0.088	4.50989e-08
Msantd4	2.25079e-07	0.147736	0.584	0.307	0.00375611
Mrpl24	4.13963e-09	0.147586	0.364	0.148	6.95375e-05
Polr2k	1.04608e-06	0.147584	0.613	0.342	0.0173817
Clmp	1.66793e-07	0.147443	0.399	0.186	0.00278478
Klhl1	7.04724e-07	0.146989	0.341	0.159	0.0117252
Rpl10	4.82745e-07	0.146578	1	0.995	0.00804011
Sema6d	2.75287e-08	0.146459	0.451	0.208	0.000461106
Pitpnm3	5.5206e-10	0.146035	0.353	0.134	9.29007e-06
Lpp	3.77959e-10	0.145925	0.272	0.089	6.36369e-06
Snn	2.62134e-06	0.145744	0.543	0.303	0.0433884
Hipk2	8.59761e-07	0.145079	0.289	0.126	0.0142987
Ptprg	1.61865e-07	0.144278	0.642	0.345	0.00270281
Zfp462	1.74537e-06	0.144112	0.775	0.468	0.028933
Sdf2l1	1.47756e-07	0.143489	0.249	0.095	0.00246753
Ablim3	7.10561e-08	0.143323	0.387	0.179	0.00118884
Spg20	1.71489e-08	0.143312	0.335	0.141	0.000287467
Emc2	5.15189e-08	0.143047	0.306	0.126	0.000862272
Rab9	1.84215e-06	0.142741	0.301	0.138	0.030528
Eif2ak3	1.51258e-08	0.141899	0.162	0.044	0.000253599
Slitrk4	1.16968e-06	0.1407	0.364	0.18	0.0194249
Pappa	2.28468e-09	0.139208	0.162	0.041	3.84078e-05
Ttc9c	2.7449e-09	0.138127	0.324	0.125	4.61335e-05
Arhgap36	1.12811e-06	0.137867	0.497	0.265	0.0187378
Snrpb2	1.27788e-06	0.137706	0.468	0.249	0.0212102
Zfp667	1.62415e-06	0.136179	0.353	0.173	0.02693
Fbn2	3.56606e-16	0.136017	0.139	0.013	6.03734e-12
Phyh	1.15705e-08	0.134608	0.283	0.106	0.000194072
Arhgap24	9.66387e-07	0.134584	0.26	0.109	0.0160633
Cnksr2	9.76317e-08	0.133752	0.312	0.131	0.0016324
Tvp23a	1.09301e-06	0.133295	0.387	0.185	0.0181571
Zfp120	9.06707e-07	0.131689	0.231	0.093	0.0150749
Col25a1	7.71701e-10	0.130965	0.364	0.143	1.29823e-05
Rps6ka3	4.22823e-08	0.128829	0.191	0.06	0.000707974
Sdhaf4	2.65471e-07	0.128209	0.405	0.192	0.00442805
Mad2l2	1.67486e-07	0.128096	0.237	0.088	0.00279618
Mfap3l	3.23e-07	0.127383	0.179	0.06	0.00538473
Rab27a	1.04658e-09	0.127287	0.266	0.088	1.76035e-05
Daam1	2.07646e-06	0.12544	0.543	0.298	0.0343986
4833420G17Rik	7.3841e-09	0.125312	0.376	0.158	0.00012392
Washc5	1.45547e-07	0.125092	0.243	0.092	0.00243078
Gucy1a1	1.26097e-07	0.12502	0.277	0.112	0.0021067
Slc41a2	1.20623e-06	0.124322	0.26	0.11	0.0200258
Etnk2	2.41556e-06	0.124313	0.312	0.146	0.0399945
Fsd1l	1.65175e-06	0.124166	0.451	0.232	0.027386
AC118542.1	5.02029e-08	0.124137	0.22	0.075	0.000840296
Sntg1	4.92362e-07	0.124081	0.266	0.11	0.00819979
Fam222a	2.09445e-10	0.123671	0.208	0.056	3.52915e-06
Lsm2	1.16868e-07	0.123316	0.22	0.078	0.00195333
Gm10036	6.2762e-09	0.122979	0.208	0.064	0.000105365
Parm1	1.34291e-08	0.122756	0.358	0.15	0.000225207
Gsg1l	7.45118e-09	0.12133	0.179	0.05	0.000125038
Pnoc	4.75868e-08	0.121035	0.48	0.235	0.000796651
Gspt2	2.49465e-06	0.120843	0.289	0.131	0.0412964
Hpgds	1.16326e-08	0.119705	0.133	0.03	0.000195101
Ttll5	2.97429e-06	0.119529	0.249	0.106	0.0492097
March1	6.93791e-07	0.119396	0.445	0.22	0.011544
Ltbp4	1.56988e-06	0.119102	0.249	0.104	0.0260334
Stbd1	7.10282e-10	0.118448	0.087	0.01	1.19505e-05
Drg2	1.21294e-06	0.118249	0.249	0.104	0.0201347
Cdkl2	1.04408e-06	0.118107	0.572	0.315	0.0173495
Gm27199	1.01725e-07	0.118027	0.399	0.183	0.00170063
AC101921.1	3.64331e-08	0.117813	0.127	0.03	0.000610072
Klhdc8b	2.70002e-07	0.116019	0.376	0.171	0.00450336
Hadha	1.90448e-06	0.115838	0.358	0.169	0.0315535
Rif1	1.61134e-06	0.113669	0.382	0.185	0.0267192
2810402E24Rik	2.28915e-06	0.113523	0.121	0.035	0.037906
Sema3a	9.19406e-08	0.113311	0.214	0.074	0.00153752
Pgd	4.40214e-07	0.113231	0.341	0.155	0.00733441
Hrasls	1.40573e-06	0.112709	0.335	0.155	0.0233183
Zfp277	1.56527e-06	0.112093	0.168	0.057	0.0259584
Gm12371	2.35729e-06	0.112009	0.191	0.072	0.0390321
Afg3l1	2.6665e-06	0.11089	0.474	0.245	0.0441332
Phf6	6.10112e-08	0.110377	0.434	0.197	0.00102108
Fam78b	1.35409e-06	0.108848	0.225	0.088	0.0224657
Mcee	1.85792e-06	0.108239	0.382	0.186	0.0307875
Htr1f	1.1653e-11	0.108237	0.098	0.01	1.96679e-07
Anxa6	6.30537e-09	0.105947	0.335	0.13	0.000105848
Cckar	2.56131e-11	0.105649	0.104	0.012	4.32196e-07
Gm6710	5.54147e-07	0.105343	0.231	0.089	0.00922545
Zc3h4	1.75521e-06	0.10457	0.341	0.159	0.0290909
C330007P06Rik	1.19293e-06	0.104046	0.277	0.121	0.0198074
Aifm3	3.78295e-07	0.103782	0.405	0.187	0.00630504
Mbd5	2.22938e-06	0.101057	0.41	0.204	0.0369207
Hsd17b10	1.41e-06	0.100073	0.295	0.13	0.0233877

## Sheet: female_branch2
	p_val	avg_logFC	pct.1	pct.2	p_val_adjust
Fgfr1	2.01989e-53	0.97376	0.691	0.354	3.5334e-49
Slc18a2	3.03669e-67	0.678718	0.674	0.208	5.31361e-63
Gda	9.15003e-63	0.65628	0.878	0.48	1.60089e-58
Tmcc3	1.01955e-68	0.650766	0.896	0.522	1.78411e-64
Zbtb20	2.20018e-66	0.610292	0.98	0.805	3.84966e-62
Scg2	5.168e-84	0.609813	1	0.939	9.04452e-80
Irs4	2.87938e-72	0.594579	0.972	0.76	5.03891e-68
Plcb4	5.7726e-53	0.588286	0.757	0.381	1.00969e-48
Tmem158	4.03798e-53	0.585688	0.878	0.559	7.06324e-49
Olfm3	1.18783e-47	0.562973	0.663	0.29	2.0774e-43
Penk	6.37758e-26	0.547831	0.478	0.219	1.11295e-21
Esr1	3.67783e-52	0.521647	0.878	0.493	6.43253e-48
Pgr	1.65258e-38	0.516208	0.615	0.292	2.88821e-34
Chodl	3.17289e-45	0.512336	0.498	0.158	5.54811e-41
Dgkb	1.1119e-46	0.509399	0.885	0.566	1.94448e-42
Pcp4	5.19015e-58	0.508021	0.998	0.966	9.08018e-54
Htr1b	5.09481e-46	0.497847	0.496	0.158	8.90929e-42
Maf	2.3217e-57	0.46899	0.339	0.049	4.06159e-53
Kcns2	5.74073e-42	0.467677	0.491	0.172	1.00359e-37
Pdzrn4	5.8996e-34	0.43554	0.607	0.287	1.03084e-29
Nop56	1.26853e-30	0.430813	0.704	0.4	2.21587e-26
Hpcal1	7.82588e-40	0.429959	0.867	0.517	1.36796e-35
Odc1	8.64828e-27	0.412788	0.639	0.374	1.50947e-22
Ctxn3	1.43701e-39	0.410992	0.289	0.055	2.51161e-35
Fam46a	3.46631e-24	0.39423	0.459	0.216	6.04594e-20
Mast4	2.05817e-23	0.39378	0.624	0.363	3.58863e-19
Tmem35a	1.4773e-17	0.386965	0.42	0.225	2.56725e-13
Enah	4.4969e-15	0.376546	0.835	0.68	7.79268e-11
Fstl5	3.46775e-30	0.374294	0.761	0.458	6.05678e-26
Tpt1	2.28401e-33	0.371815	0.963	0.849	3.99061e-29
Pdyn	1.5665e-27	0.371646	0.32	0.104	2.73495e-23
Rasgrf2	1.39024e-24	0.370726	0.763	0.509	2.42514e-20
Pcdh15	6.88478e-18	0.365417	0.437	0.236	1.19671e-13
Pde1c	4.03567e-33	0.364426	0.689	0.341	7.05071e-29
Oprk1	9.99518e-21	0.363127	0.589	0.335	1.74026e-16
Tead1	5.68878e-24	0.355462	0.496	0.236	9.92066e-20
Sccpdh	3.64363e-19	0.355048	0.572	0.346	6.33774e-15
Plekhb1	1.08155e-20	0.353433	0.47	0.239	1.88299e-16
Sv2c	9.82688e-19	0.351974	0.463	0.243	1.70889e-14
Ptp4a1	8.32858e-22	0.350453	0.774	0.549	1.45084e-17
Tcf4	2.83127e-20	0.346687	0.591	0.335	4.92811e-16
AW551984	5.52768e-23	0.344112	0.883	0.654	9.63586e-19
Clmp	1.51831e-27	0.339851	0.474	0.204	2.65097e-23
Maged1	3.88671e-24	0.339731	0.937	0.783	6.77881e-20
Gabre	1.39252e-21	0.339472	0.637	0.37	2.42564e-17
Id4	7.28709e-20	0.336023	0.696	0.445	1.26803e-15
Ucp2	4.34026e-24	0.335509	0.367	0.143	7.56941e-20
Eif1b	1.38479e-25	0.332086	0.941	0.81	2.41646e-21
Rps27rt	1.87878e-25	0.332008	0.904	0.645	3.2781e-21
Arhgef9	1.64305e-20	0.330255	0.757	0.511	2.86023e-16
Ogt	6.40425e-21	0.329721	0.939	0.809	1.11511e-16
Ctnna2	2.53963e-17	0.327813	0.604	0.398	4.41209e-13
Stum	3.19924e-23	0.327804	0.463	0.209	5.57755e-19
Itm2c	9.01645e-40	0.327493	0.996	0.97	1.57598e-35
Lrp1b	6.18676e-20	0.326831	0.837	0.619	1.07668e-15
Ddc	1.91669e-30	0.324138	0.324	0.092	3.34788e-26
Sez6l	2.3771e-23	0.323782	0.889	0.683	4.14448e-19
mt-Atp6	1.6268e-43	0.322701	1	1	2.8443e-39
Nos1ap	2.00207e-27	0.318097	0.576	0.271	3.49501e-23
1500009L16Rik	5.59447e-19	0.317394	0.704	0.48	9.73046e-15
Prickle2	3.15427e-21	0.317087	0.53	0.294	5.49316e-17
Cacna2d1	1.38951e-25	0.31578	0.55	0.262	2.42455e-21
Apoc3	4.41971e-26	0.313527	0.376	0.133	7.71328e-22
Rxfp3	6.49135e-31	0.309904	0.207	0.034	1.13397e-26
Rap1gap	2.23878e-18	0.303752	0.7	0.473	3.89278e-14
Ets2	4.55827e-20	0.301887	0.672	0.411	7.93366e-16
Lbhd2	2.27203e-18	0.301443	0.259	0.096	3.95038e-14
Ntng1	1.45542e-24	0.299513	0.911	0.592	2.5387e-20
Nrsn1	7.55517e-29	0.297593	0.987	0.909	1.31928e-24
Kl	1.40239e-22	0.295805	0.233	0.065	2.44423e-18
mt-Co2	1.41706e-37	0.292738	1	0.998	2.47646e-33
Slc17a8	1.18171e-19	0.290046	0.241	0.076	2.05606e-15
Sox4	5.60538e-16	0.289808	0.57	0.334	9.72758e-12
Ppp1r17	3.18789e-21	0.288668	0.276	0.092	5.55139e-17
Th	1.3353e-20	0.285608	0.283	0.097	2.32463e-16
Il13ra1	6.03279e-24	0.285377	0.465	0.209	1.052e-19
Pcsk2	3.98921e-14	0.283181	0.693	0.492	6.90812e-10
Ak4	1.50013e-21	0.279671	0.463	0.219	2.61292e-17
Pgr15l	2.32941e-13	0.278778	0.5	0.303	4.02965e-09
Efna5	5.29607e-22	0.278561	0.876	0.629	9.22628e-18
Klf9	7.98173e-18	0.276387	0.459	0.237	1.3873e-13
Eif4g2	1.79379e-22	0.27632	0.972	0.871	3.12604e-18
Parm1	4.67187e-22	0.275215	0.333	0.125	8.14027e-18
Vstm2b	1.41838e-15	0.273144	0.409	0.218	2.45961e-11
Hs3st5	2.34783e-20	0.272171	0.376	0.162	4.08687e-16
Adarb2	1.38125e-24	0.271539	0.524	0.231	2.4096e-20
Slitrk1	1.23327e-15	0.270639	0.539	0.322	2.13899e-11
Meg3	1.57737e-35	0.269395	1	1	2.75645e-31
Nrip1	1.32996e-19	0.266936	0.278	0.102	2.31386e-15
Negr1	5.13587e-17	0.266846	0.965	0.858	8.92153e-13
Elmo1	3.24968e-13	0.266812	0.62	0.42	5.62097e-09
Msi2	4.10157e-13	0.26479	0.604	0.413	7.09284e-09
Rps12	1.83153e-27	0.263264	0.996	0.977	3.19749e-23
Ngb	5.62741e-11	0.260959	0.62	0.441	9.6904e-07
Fndc9	1.34252e-15	0.259691	0.541	0.324	2.3282e-11
Elavl4	4.97613e-14	0.256691	0.857	0.684	8.61518e-10
Unc80	1.68975e-16	0.254097	0.839	0.661	2.93408e-12
Rpl22	1.47406e-13	0.252955	0.889	0.736	2.55086e-09
Gm1673	2.10186e-13	0.251554	0.92	0.808	3.63644e-09
Prkce	3.27817e-11	0.251419	0.652	0.473	5.64796e-07
Ptpro	2.81244e-15	0.249637	0.704	0.484	4.87536e-11
Zmat4	1.0479e-15	0.248244	0.524	0.303	1.81779e-11
Wdr89	6.13864e-16	0.24608	0.596	0.366	1.06518e-11
Ogfrl1	8.12415e-16	0.245856	0.728	0.503	1.40954e-11
Mmd	5.79173e-12	0.243477	0.659	0.473	9.99479e-08
Bcl11a	1.0673e-15	0.242996	0.687	0.424	1.85134e-11
Rps6ka6	6.22681e-21	0.241495	0.274	0.094	1.08428e-16
Rps24	3.42662e-32	0.240751	1	0.995	5.98631e-28
Mxra7	4.85345e-22	0.240629	0.343	0.13	8.45616e-18
Slitrk6	1.38155e-22	0.239861	0.193	0.046	2.40805e-18
Rplp2	9.59751e-30	0.239848	1	0.994	1.6762e-25
Enpp2	5.79962e-17	0.239418	0.309	0.128	1.00739e-12
Galnt14	5.19125e-22	0.238933	0.4	0.161	9.0442e-18
Gm9493	4.48314e-13	0.238517	0.374	0.211	7.7518e-09
Tmod1	7.09697e-17	0.238454	0.387	0.183	1.2326e-12
Lrfn5	2.59969e-12	0.236419	0.848	0.686	4.48836e-08
Tspan2	5.20874e-16	0.23631	0.507	0.283	9.03977e-12
mt-Nd3	1.56706e-16	0.233859	0.967	0.859	2.7212e-12
Reep5	1.91255e-16	0.232689	0.933	0.791	3.32039e-12
Htr2c	4.11508e-13	0.230103	0.409	0.221	7.1158e-09
Rpl5	3.07673e-15	0.229565	0.954	0.865	5.3329e-11
Rplp0	2.16081e-14	0.226971	0.948	0.856	3.74296e-10
Atp1b3	1.64566e-08	0.226792	0.589	0.439	0.00028131
Drp2	6.20542e-20	0.226708	0.293	0.108	1.07987e-15
Syt6	2.97543e-08	0.224303	0.224	0.121	0.000508204
Eef1a1	9.14166e-29	0.224246	1	1	1.59623e-24
Sox5	3.05025e-21	0.223699	0.341	0.125	5.31232e-17
Saraf	2.49159e-14	0.220612	0.883	0.735	4.31568e-10
Per3	1.84492e-13	0.219968	0.554	0.334	3.19208e-09
mt-Nd4	7.18588e-24	0.219858	1	0.995	1.253e-19
Ralgps2	1.23433e-09	0.219059	0.448	0.289	2.11847e-05
Plxnc1	6.06947e-12	0.21878	0.589	0.388	1.04729e-07
Rack1	8.44617e-12	0.217893	0.85	0.696	1.45696e-07
Stk19	5.44159e-11	0.217408	0.472	0.293	9.37095e-07
Hlf	1.62066e-15	0.21718	0.652	0.392	2.8099e-11
Mgat5	1.40321e-12	0.216652	0.502	0.3	2.42348e-08
Arpc5	8.87169e-13	0.216423	0.698	0.484	1.53303e-08
Socs2	4.97521e-08	0.216342	0.28	0.164	0.00084892
H2-Q2	2.98115e-17	0.216075	0.209	0.067	5.17886e-13
Map2	1.06903e-13	0.215594	0.948	0.817	1.85038e-09
Irs2	2.66347e-14	0.213535	0.465	0.261	4.61313e-10
Zcchc12	1.15496e-16	0.21189	0.989	0.913	2.0057e-12
Rbbp7	5.46811e-08	0.210878	0.463	0.325	0.000932641
Arhgap24	2.71448e-16	0.210688	0.32	0.139	4.71207e-12
Chpt1	5.80548e-12	0.209879	0.333	0.177	1.00179e-07
2010107E04Rik	7.22517e-10	0.208803	0.759	0.596	1.24114e-05
Rps4x	3.49938e-23	0.208744	1	0.998	6.10047e-19
Rpl12	1.49001e-17	0.208431	0.987	0.927	2.58918e-13
Nkx2-1	6.71495e-18	0.206585	0.393	0.169	1.16733e-13
Rpl30	1.20122e-17	0.206233	0.998	0.966	2.0876e-13
Gfra1	6.27702e-12	0.20474	0.426	0.245	1.08304e-07
Nap1l5	1.40374e-22	0.204054	0.998	0.998	2.44643e-18
Hmgn2	5.90393e-09	0.202316	0.776	0.62	0.000101081
Hspa5	2.09793e-09	0.201788	0.609	0.426	3.59859e-05
Sowaha	7.98778e-20	0.201121	0.222	0.066	1.38987e-15
Rps10	1.77532e-16	0.199231	0.987	0.967	3.0823e-12
Pik3r3	3.95898e-16	0.198587	0.326	0.142	6.8712e-12
Polr1d	3.31428e-11	0.197565	0.774	0.595	5.70984e-07
Dbpht2	1.63438e-13	0.196701	0.759	0.526	2.82797e-09
Shisa2	6.8486e-18	0.19652	0.165	0.041	1.19049e-13
Egr2	3.04026e-27	0.196349	0.117	0.007	5.30677e-23
Plxna2	7.88403e-13	0.195406	0.63	0.399	1.36252e-08
Fut8	3.10693e-10	0.194986	0.515	0.329	5.34393e-06
Scml4	6.57741e-15	0.194511	0.246	0.098	1.13967e-10
Gabra3	2.82561e-09	0.194383	0.65	0.459	4.84536e-05
Gm16485	3.09521e-22	0.193901	0.207	0.051	5.3934e-18
Galnt13	4.82816e-10	0.193833	0.37	0.218	8.30154e-06
Trp53inp1	1.3571e-22	0.193541	0.207	0.05	2.36557e-18
Rpl9-ps6	2.72267e-11	0.193438	0.389	0.225	4.69115e-07
Cdkl2	7.55284e-12	0.192694	0.561	0.356	1.30294e-07
Slc7a1	6.13081e-11	0.192645	0.448	0.274	1.05566e-06
Rpl22l1	2.18465e-19	0.191558	1	0.985	3.80042e-15
Pop5	5.2817e-08	0.190621	0.557	0.391	0.000900953
Sptssa	3.33622e-11	0.190223	0.572	0.374	5.7473e-07
Eef1b2	2.99836e-10	0.18966	0.926	0.773	5.15748e-06
Prrt1	1.32749e-07	0.189599	0.543	0.397	0.00225872
Rpl10-ps3	1.13932e-09	0.189509	0.502	0.335	1.95552e-05
Usp51	6.35822e-12	0.189347	0.272	0.129	1.09698e-07
Zfp462	4.99482e-11	0.189292	0.724	0.529	8.60309e-07
Mettl9	3.34361e-10	0.187864	0.6	0.41	5.75067e-06
Rps15a	7.65355e-19	0.187831	1	0.991	1.33111e-14
Ssr3	8.05866e-10	0.187739	0.663	0.483	1.38407e-05
Npy2r	7.83024e-13	0.187267	0.743	0.478	1.3533e-08
Pak3	2.04427e-11	0.186541	0.963	0.872	3.5231e-07
mt-Nd2	1.74963e-18	0.186404	0.993	0.991	3.04244e-14
Nr3c1	1.74888e-08	0.186153	0.637	0.441	0.000298936
Rev3l	1.80597e-09	0.186118	0.467	0.3	3.0985e-05
Scn9a	1.15499e-11	0.185764	0.539	0.329	1.99143e-07
Sdhaf4	8.78386e-12	0.185132	0.365	0.202	1.51495e-07
Baiap2	2.48908e-09	0.185009	0.502	0.335	4.26903e-05
Crtac1	1.30349e-13	0.184214	0.233	0.095	2.25595e-09
Astn1	1.02811e-09	0.183664	0.835	0.682	1.76496e-05
Rbms3	1.23455e-08	0.183661	0.393	0.253	0.000211157
Rgma	4.18718e-15	0.183178	0.2	0.067	7.25639e-11
Prlr	5.66527e-07	0.18289	0.815	0.68	0.00961057
Rps13	6.72404e-17	0.182515	0.996	0.986	1.1679e-12
Klhl24	4.57601e-08	0.18244	0.561	0.41	0.000780896
Rad23b	5.50187e-10	0.182179	0.735	0.559	9.45882e-06
Bmp3	5.63336e-15	0.182088	0.17	0.051	9.76148e-11
Sphkap	1.26872e-09	0.180158	0.487	0.314	2.17738e-05
Tmem255a	2.74442e-08	0.178677	0.87	0.74	0.000468803
Naaa	4.86712e-13	0.178574	0.304	0.147	8.41477e-09
Sema3a	7.47477e-16	0.17785	0.18	0.055	1.29695e-11
Dlx1	9.55603e-08	0.177639	0.8	0.647	0.00162796
Pls3	6.91356e-09	0.176828	0.372	0.23	0.000118332
Hsbp1	4.99047e-08	0.176057	0.861	0.714	0.000851474
5330417C22Rik	6.70535e-13	0.175849	0.498	0.285	1.15909e-08
Peg3	1.61561e-15	0.174832	1	0.995	2.8013e-11
Fhad1	1.64655e-12	0.174598	0.363	0.186	2.84342e-08
Pdia3	2.60461e-09	0.173909	0.483	0.322	4.46665e-05
Chml	5.95072e-16	0.172303	0.198	0.065	1.03263e-11
Anp32b	1.07054e-08	0.171888	0.528	0.356	0.000183127
Neto2	4.42767e-09	0.17144	0.257	0.135	7.58459e-05
Npm1	3.08379e-09	0.169224	0.963	0.899	5.28747e-05
Rps20	3.32899e-14	0.169189	0.996	0.97	5.76515e-10
Rpl7a	2.40384e-11	0.169091	0.985	0.925	4.14206e-07
Tmem132b	1.14756e-07	0.168224	0.452	0.303	0.00195407
Hsp90b1	8.31035e-07	0.168182	0.776	0.608	0.0140719
Snhg11	1.44536e-29	0.167933	1	1	2.52404e-25
Pnmal1	8.37025e-08	0.167428	0.826	0.667	0.00142629
Rpl39	4.9792e-14	0.166966	0.998	0.977	8.61999e-10
Snrpb	5.80274e-10	0.166928	0.337	0.189	9.9726e-06
Sema6a	1.01687e-11	0.166821	0.415	0.226	1.75359e-07
Gm2000	1.11514e-07	0.166032	0.461	0.312	0.00189919
Hap1	1.16894e-13	0.165805	0.996	0.977	2.0232e-09
Alg10b	1.4888e-10	0.165791	0.398	0.233	2.56222e-06
Pds5b	6.06662e-09	0.164091	0.672	0.475	0.000103861
mt-Nd1	9.724e-15	0.16385	1	1	1.68468e-10
Rpl29	1.50051e-13	0.163325	0.998	0.969	2.59649e-09
Tesc	1.52361e-11	0.163163	0.215	0.09	2.6264e-07
Rps3a1	9.6477e-17	0.162922	1	0.998	1.67552e-12
Herc3	5.59957e-10	0.162857	0.783	0.602	9.62567e-06
Slc4a8	2.13424e-09	0.161568	0.404	0.244	3.66065e-05
Esyt3	1.70516e-12	0.161262	0.215	0.087	2.94448e-08
Hsph1	7.63426e-07	0.161104	0.83	0.678	0.0129332
Rps2	1.48465e-15	0.16083	1	0.978	2.57438e-11
5330434G04Rik	3.59467e-07	0.16033	0.696	0.538	0.00610411
Znrf2	1.24187e-12	0.160276	0.241	0.103	2.14496e-08
Hspa8	4.68626e-09	0.159962	0.974	0.938	8.02615e-05
Tnxb	2.76199e-27	0.159651	0.122	0.009	4.82132e-23
Etnk2	6.42911e-10	0.159612	0.278	0.141	1.10465e-05
Rasd1	1.01552e-15	0.159117	0.113	0.022	1.76173e-11
Il1rap	8.41416e-08	0.159061	0.272	0.155	0.00143369
Taf15	5.99003e-10	0.158967	0.452	0.278	1.02939e-05
Zfp157	6.98339e-08	0.15882	0.461	0.31	0.00119046
Ptprk	3.42403e-08	0.158662	0.541	0.373	0.000584688
Ralgapa1	1.99674e-07	0.157825	0.472	0.325	0.00339427
Rps7	3.2911e-16	0.157697	1	0.996	5.71237e-12
Rpl17	5.92653e-20	0.157501	1	1	1.03145e-15
Lin7a	3.8355e-09	0.157355	0.548	0.367	6.57214e-05
Cnot7	1.50844e-07	0.157327	0.574	0.417	0.00256586
4833439L19Rik	3.13295e-08	0.15713	0.561	0.395	0.000535076
Brinp2	5.16463e-07	0.156844	0.417	0.279	0.00876438
Cers5	7.18124e-09	0.15589	0.32	0.183	0.000122907
Mpped2	3.88414e-12	0.155872	0.307	0.147	6.7052e-08
Cap2	2.09386e-08	0.154107	0.417	0.26	0.000357862
Rpl18	3.68358e-08	0.154076	0.957	0.909	0.00062875
Ncam1	1.50671e-10	0.153472	1	0.982	2.5929e-06
Morn2	3.64801e-08	0.153333	0.459	0.301	0.000622715
Kcnk2	1.94784e-07	0.152646	0.635	0.452	0.00331153
Tspan6	3.32839e-09	0.152077	0.396	0.238	5.70453e-05
Txndc17	6.43084e-08	0.150972	0.626	0.455	0.00109646
Cdkl5	1.52676e-08	0.150939	0.459	0.296	0.00026103
Rtn4	2.46826e-06	0.150348	0.846	0.727	0.0416766
Cnih1	2.24405e-07	0.150087	0.511	0.368	0.00381376
Rpl23	4.95526e-14	0.149208	1	0.997	8.57954e-10
Abhd17b	6.09309e-10	0.148888	0.35	0.195	1.04704e-05
Pdcd4	1.1116e-06	0.148759	0.791	0.645	0.018815
Lpp	4.30176e-12	0.148579	0.235	0.101	7.42527e-08
Kcnq1ot1	1.94096e-06	0.14822	0.907	0.788	0.0328041
Rpl7	8.66638e-10	0.147966	0.983	0.944	1.48836e-05
Rps3	1.4654e-14	0.147669	0.998	0.998	2.53865e-10
Arfgef3	1.79919e-06	0.147419	0.857	0.706	0.0304154
Tcp1	1.28541e-06	0.14726	0.78	0.619	0.0217504
Ormdl1	9.89652e-11	0.147164	0.215	0.097	1.70349e-06
Pard3	7.27776e-07	0.146979	0.298	0.184	0.0123336
Npy1r	2.40007e-08	0.146888	0.287	0.161	0.000410124
Rpl31	1.46715e-12	0.146526	1	0.995	2.53377e-08
Acvr2a	1.5815e-09	0.146473	0.307	0.168	2.71369e-05
Ly6h	7.16028e-08	0.146379	0.976	0.928	0.00122054
Tmem209	3.27357e-13	0.145977	0.27	0.118	5.66197e-09
Edil3	8.5519e-09	0.145182	0.654	0.438	0.000146332
Npy5r	3.7297e-13	0.14496	0.217	0.084	6.45052e-09
Mcfd2	3.61447e-08	0.14492	0.496	0.337	0.000617062
Sorcs3	3.38951e-07	0.144893	0.5	0.337	0.00575708
Dlx2	2.05861e-11	0.144837	0.472	0.277	3.54761e-07
Dstn	1.24489e-07	0.144733	0.733	0.548	0.00211893
Cetn2	1.26188e-08	0.144665	0.409	0.253	0.00021582
Plppr4	1.44658e-06	0.144567	0.796	0.653	0.0244689
Rpl23a	2.90719e-16	0.144217	1	0.997	5.0463e-12
Sytl4	2.81868e-14	0.143779	0.067	0.006	4.88168e-10
Rps9	7.93682e-10	0.143267	1	0.984	1.36323e-05
Gm42851	1.21771e-07	0.142426	0.328	0.198	0.00207279
Ola1	1.15123e-07	0.142395	0.476	0.327	0.0019602
Prnp	6.72201e-09	0.14178	0.972	0.921	0.000115067
Usp48	1.33849e-08	0.140973	0.361	0.218	0.000228882
Mfng	6.77186e-09	0.14092	0.189	0.087	0.000115914
Uqcrb	6.30975e-07	0.140678	0.683	0.509	0.0106982
Mtpn	6.02498e-07	0.14053	0.904	0.754	0.0102184
Gpbp1	1.12821e-06	0.140404	0.565	0.409	0.019095
Trp53i11	1.00799e-09	0.140399	0.276	0.141	1.73053e-05
Lin7c	3.31462e-07	0.139577	0.524	0.361	0.00563021
Med13	1.60451e-08	0.138716	0.346	0.204	0.000274308
H3f3a	9.40703e-07	0.138516	0.746	0.553	0.0159261
Smim10l1	1.55321e-06	0.138028	0.887	0.732	0.0262695
Fam171b	2.59661e-06	0.137545	0.841	0.722	0.0438335
Dcp2	1.84227e-07	0.137472	0.446	0.293	0.00313241
Rps27a	4.13363e-15	0.136039	1	0.998	7.16399e-11
Mal2	2.11972e-06	0.135669	0.472	0.339	0.0358127
Tmem50a	1.19984e-07	0.135501	0.646	0.469	0.00204261
Chst11	4.78296e-09	0.135378	0.272	0.147	8.1913e-05
Arsb	1.90536e-07	0.135219	0.428	0.281	0.0032395
Syne2	6.2428e-09	0.13466	0.215	0.105	0.000106871
Spint2	8.1177e-07	0.13461	0.541	0.383	0.0137489
Rpl36a-ps1	8.28636e-07	0.134342	0.228	0.133	0.0140329
Cdr2	1.34026e-13	0.133477	0.157	0.048	2.31946e-09
Bok	9.47814e-08	0.133402	0.257	0.14	0.00161479
Smc5	1.46863e-07	0.131349	0.337	0.206	0.00249829
Tspan7	9.55839e-08	0.130803	0.987	0.924	0.00162827
Dapk1	6.36414e-07	0.130482	0.491	0.331	0.0107898
mt-Cytb	9.22655e-13	0.129932	1	1	1.59416e-08
Fam183b	2.17477e-10	0.129758	0.283	0.14	3.74148e-06
Nek7	2.84906e-08	0.129541	0.287	0.159	0.000486648
Rufy3	1.92995e-06	0.129074	0.907	0.8	0.03262
Snn	2.4598e-07	0.128882	0.489	0.336	0.00417994
Fsd1l	1.57734e-06	0.128459	0.387	0.256	0.0266728
Nudt4	1.6571e-06	0.127613	0.322	0.205	0.0280199
As3mt	7.33066e-12	0.127022	0.27	0.122	1.26469e-07
Nyap2	4.3412e-07	0.126014	0.267	0.152	0.00737049
Hrk	6.22725e-07	0.125855	0.241	0.137	0.0105595
Airn	1.75327e-16	0.125536	0.093	0.012	3.04421e-12
Btbd11	2.68129e-08	0.125075	0.422	0.254	0.000458072
Spg20	1.98193e-07	0.123652	0.267	0.154	0.00336927
Twsg1	5.2998e-12	0.12359	0.213	0.087	9.14692e-08
A730046J19Rik	8.76193e-19	0.12315	0.076	0.004	1.52379e-14
4930570G19Rik	5.69541e-10	0.121569	0.211	0.095	9.78927e-06
Icam5	2.99256e-10	0.11964	0.146	0.053	5.14781e-06
Rpl27-ps3	7.91469e-07	0.119374	0.298	0.184	0.0134067
March8	2.33077e-06	0.119367	0.422	0.288	0.0393598
Amy1	7.84982e-08	0.119324	0.263	0.145	0.00133792
1110017D15Rik	3.24284e-09	0.118404	0.202	0.094	5.55887e-05
Rpl19	1.14305e-11	0.118392	1	0.998	1.97107e-07
Cntn2	8.07625e-08	0.118326	0.42	0.266	0.00137635
Fjx1	4.99721e-10	0.117983	0.143	0.051	8.5917e-06
Rab40b	1.03435e-09	0.117869	0.163	0.066	1.77557e-05
Rpl34	2.10657e-10	0.117752	1	0.995	3.62435e-06
Il1rapl2	7.39567e-10	0.117642	0.139	0.051	1.27035e-05
Gadd45a	4.50536e-10	0.117193	0.124	0.041	7.74697e-06
Cetn3	7.3481e-07	0.116566	0.63	0.457	0.0124514
Focad	5.12617e-08	0.116318	0.183	0.087	0.000874525
Hmgn1	2.24311e-06	0.115606	0.907	0.785	0.0378861
Rps21	2.09289e-09	0.11289	1	0.997	3.59014e-05
Eif1	2.60346e-09	0.112783	1	0.991	4.46494e-05
Sgcb	1.56761e-06	0.11253	0.33	0.208	0.0265113
Snx6	5.50167e-07	0.111761	0.278	0.165	0.00933413
Cetn4	2.74578e-06	0.11148	0.267	0.162	0.0463378
Rasl11b	4.07498e-11	0.111405	0.157	0.054	7.01957e-07
Rpl35a	8.76636e-12	0.111328	1	0.999	1.51202e-07
Fam19a1	6.20607e-07	0.111131	0.209	0.109	0.0105242
Pnrc2	4.89638e-07	0.111011	0.361	0.225	0.00831014
Prok2	2.82018e-07	0.110617	0.322	0.19	0.0047912
Tmsb4x	7.8521e-07	0.110186	1	0.998	0.0133015
Pnpt1	1.80172e-07	0.109918	0.18	0.089	0.00306383
Gpr158	3.59292e-07	0.109701	0.32	0.193	0.0061015
Me1	5.31118e-07	0.109594	0.233	0.129	0.00901202
Tgfbr1	1.64118e-08	0.109371	0.154	0.065	0.000280559
Rpl9	9.2338e-13	0.108748	1	0.999	1.59532e-08
Smim7	1.31698e-07	0.108658	0.424	0.269	0.00224097
Slc29a4	6.68955e-08	0.108521	0.27	0.147	0.0011405
2810474O19Rik	2.48699e-06	0.108447	0.287	0.178	0.0419854
Stk32a	3.7621e-10	0.108424	0.274	0.132	6.46969e-06
Ccp110	8.45344e-08	0.108176	0.357	0.211	0.0014403
Insm2	8.24526e-13	0.108012	0.185	0.065	1.42486e-08
Rps6ka3	1.51858e-09	0.107906	0.135	0.048	2.60587e-05
Dusp18	1.20362e-07	0.107369	0.235	0.126	0.00204893
Kit	1.42496e-08	0.106672	0.111	0.038	0.000243653
Enox2	2.48063e-06	0.106614	0.159	0.081	0.0418804
Spag6l	2.02991e-08	0.106547	0.133	0.052	0.000346953
Ptk2b	1.46902e-10	0.106501	0.128	0.041	2.52833e-06
Rpl26	7.20104e-11	0.106484	1	1	1.23973e-06
Rps8	9.19757e-13	0.106444	1	1	1.58925e-08
Sumo2	2.68452e-06	0.106393	0.933	0.838	0.0453148
Kcnmb4	1.2963e-08	0.105931	0.228	0.112	0.00022168
Pmepa1	2.09427e-06	0.105891	0.241	0.14	0.0353868
mt-Co3	1.36249e-11	0.104772	1	1	2.34893e-07
Elovl5	1.29155e-06	0.103319	0.224	0.123	0.021853
Nxn	6.99781e-10	0.103273	0.109	0.033	1.20222e-05
Cldn1	3.48078e-08	0.101961	0.126	0.048	0.000594309
Bid	1.26252e-08	0.101756	0.172	0.076	0.000215917
Cux1	2.13306e-06	0.101578	0.378	0.245	0.0360316
Rps17	1.71222e-06	0.101492	0.996	0.98	0.0289485
Ikzf2	1.06458e-08	0.101406	0.139	0.055	0.000182139
Rps16	7.78064e-09	0.101374	1	0.998	0.000133158
Lima1	1.37742e-06	0.101187	0.17	0.085	0.0233045
Tekt1	5.33253e-09	0.100126	0.141	0.054	9.13196e-05

## Sheet: female late trajectory
genes	p_val	avg_logFC	pct.1	pct.2	p_val_adjust	type
Fgfr1	1.36405e-62	0.902546	0.703	0.354	2.40524e-58	shared
Pcp4	1.18707e-85	0.592698	0.998	0.966	2.09351e-81	shared
Gda	7.35874e-62	0.590576	0.848	0.48	1.29749e-57	other
Slc18a2	3.2784e-59	0.586551	0.605	0.208	5.78014e-55	female specific
Penk	4.32066e-27	0.542114	0.46	0.219	7.59788e-23	female specific
Tmcc3	9.0311e-57	0.540624	0.845	0.522	1.59218e-52	shared
Olfm3	2.66185e-53	0.527711	0.656	0.29	4.69258e-49	shared
Esr1	4.96369e-66	0.527284	0.886	0.493	8.75297e-62	other
Scg2	2.80948e-69	0.505564	1	0.939	4.95451e-65	female specific
Plcb4	8.29162e-46	0.49686	0.706	0.381	1.46132e-41	shared
Tmem35a	6.89995e-38	0.491842	0.499	0.225	1.21522e-33	shared
Pdzrn4	1.9522e-52	0.491107	0.652	0.287	3.44134e-48	shared
Zbtb20	4.22698e-44	0.480243	0.945	0.805	7.44793e-40	shared
Tmem158	3.34937e-44	0.474312	0.853	0.559	5.90192e-40	other
Pgr	2.51768e-43	0.46688	0.619	0.292	4.4359e-39	shared
Irs4	4.50989e-49	0.460977	0.93	0.76	7.94959e-45	shared
Chodl	1.83319e-40	0.433397	0.452	0.158	3.22935e-36	other
Fstl5	1.67979e-38	0.397332	0.76	0.458	2.95877e-34	shared
Kcns2	4.56858e-37	0.38511	0.447	0.172	8.04482e-33	shared
Tpt1	3.57495e-46	0.383315	0.972	0.849	6.30084e-42	shared
Htr1b	1.14406e-32	0.371983	0.412	0.158	2.01377e-28	shared
Nts	7.48102e-08	0.368594	0.325	0.221	0.00128621	shared
Nop56	5.80874e-30	0.365604	0.694	0.4	1.02199e-25	shared
Dgkb	4.6279e-27	0.364497	0.796	0.566	8.13724e-23	other
Maf	1.37897e-42	0.362531	0.269	0.049	2.42933e-38	shared
Hpcal1	5.78394e-36	0.35904	0.84	0.517	1.01826e-31	shared
Apoc3	1.28301e-36	0.345897	0.406	0.133	2.259e-32	shared
Nrip1	2.56038e-34	0.343669	0.33	0.102	4.50729e-30	shared
Nrsn1	7.23167e-47	0.343364	0.989	0.909	1.27465e-42	shared
Drp2	6.79495e-43	0.341085	0.381	0.108	1.19713e-38	shared
Ctxn3	4.21367e-31	0.339451	0.239	0.055	7.41565e-27	female specific
Ddc	4.318e-38	0.336105	0.338	0.092	7.6053e-34	other
Maged1	7.96832e-31	0.333373	0.942	0.783	1.40219e-26	shared
Lrp1b	5.7727e-26	0.330456	0.85	0.619	1.01449e-21	shared
Ntng1	5.71807e-32	0.329497	0.907	0.592	1.00638e-27	other
Enah	4.97844e-17	0.32864	0.848	0.68	8.71128e-13	other
Tead1	1.65947e-23	0.323865	0.469	0.236	2.91435e-19	female specific
Arhgef9	7.77196e-27	0.321479	0.78	0.511	1.36639e-22	other
Rps27rt	2.54278e-30	0.320827	0.907	0.645	4.47428e-26	shared
Ppp1r17	2.90981e-30	0.318317	0.303	0.092	5.11982e-26	female specific
AW551984	5.2168e-26	0.315505	0.889	0.654	9.16852e-22	shared
Mast4	2.72969e-20	0.315471	0.597	0.363	4.78679e-16	other
Plekhb1	4.34441e-23	0.313163	0.469	0.239	7.62878e-19	other
Odc1	4.71129e-19	0.313141	0.589	0.374	8.25559e-15	other
Ptp4a1	1.57281e-22	0.308479	0.773	0.549	2.76138e-18	shared
Sccpdh	1.10536e-21	0.308334	0.583	0.346	1.94035e-17	shared
Fam46a	4.30442e-21	0.306464	0.427	0.216	7.55297e-17	female specific
mt-Atp6	1.23389e-45	0.29802	1	1	2.17449e-41	shared
Sv2c	6.87461e-20	0.294956	0.458	0.243	1.20526e-15	shared
Gabre	2.27822e-22	0.292579	0.629	0.37	3.99964e-18	female specific
Pcdh15	3.46446e-17	0.289105	0.428	0.236	6.0635e-13	female specific
Clmp	7.67698e-27	0.287011	0.453	0.204	1.34977e-22	other
mt-Co2	1.2811e-45	0.285759	1	0.998	2.25756e-41	shared
Pde1c	1.33578e-28	0.284896	0.648	0.341	2.34963e-24	other
Efna5	2.94191e-25	0.280739	0.875	0.629	5.16894e-21	female specific
Itm2c	1.14101e-37	0.279395	0.995	0.97	2.00932e-33	shared
Ptpro	8.91097e-24	0.27632	0.738	0.484	1.56512e-19	other
Eif1b	1.04765e-23	0.276162	0.943	0.81	1.83999e-19	shared
Kl	2.41337e-26	0.275735	0.237	0.065	4.24198e-22	female specific
Nos1ap	1.55678e-27	0.272776	0.558	0.271	2.73791e-23	other
Pdyn	3.39887e-19	0.270053	0.262	0.104	5.95653e-15	female specific
Rps12	1.94817e-36	0.268012	0.997	0.977	3.42994e-32	shared
Slitrk1	4.6992e-21	0.267899	0.567	0.322	8.24522e-17	shared
Unc5d	1.92268e-12	0.26601	0.744	0.589	3.34643e-08	shared
Prkce	1.13113e-15	0.263414	0.678	0.473	1.97709e-11	shared
Ogt	1.30428e-16	0.2625	0.937	0.809	2.28185e-12	other
Rap1gap	1.91086e-17	0.262469	0.69	0.473	3.34496e-13	other
Spon1	9.15536e-17	0.262228	0.242	0.096	1.60191e-12	shared
Fndc9	4.08453e-21	0.262049	0.566	0.324	7.16753e-17	other
Spock3	1.16228e-13	0.260985	0.572	0.391	2.0276e-09	shared
Msi2	1.13618e-14	0.260582	0.608	0.413	1.98378e-10	female specific
Adarb2	3.18316e-29	0.260253	0.528	0.231	5.5995e-25	other
Lbhd2	7.98543e-21	0.259125	0.261	0.096	1.40096e-16	other
Sox4	5.64068e-18	0.258854	0.57	0.334	9.87852e-14	female specific
Pak3	4.09327e-24	0.257554	0.967	0.872	7.19024e-20	shared
Lrfn5	2.05076e-18	0.257226	0.877	0.686	3.59272e-14	shared
Pgr15l	2.94017e-15	0.256819	0.502	0.303	5.13677e-11	female specific
Rasgrf2	1.75151e-15	0.256607	0.706	0.509	3.06093e-11	other
Meg3	9.83712e-38	0.255305	1	1	1.73242e-33	shared
Id4	3.25862e-16	0.254862	0.664	0.445	5.69867e-12	shared
Ngb	1.49723e-14	0.253957	0.641	0.441	2.61402e-10	other
Prickle2	2.75704e-18	0.253134	0.504	0.294	4.8295e-14	female specific
Parm1	2.26936e-26	0.25267	0.34	0.125	3.98909e-22	shared
Pcdh7	4.69712e-15	0.252391	0.823	0.639	8.20492e-11	shared
Elavl4	1.02368e-17	0.250488	0.866	0.684	1.79247e-13	other
Sez6l	1.16953e-17	0.246791	0.88	0.683	2.04773e-13	shared
Nrp1	3.10923e-23	0.243947	0.302	0.112	5.46012e-19	shared
Ets2	3.81125e-17	0.241147	0.648	0.411	6.67008e-13	shared
Rpl22l1	1.56175e-33	0.23905	1	0.985	2.74915e-29	shared
Rps24	1.65044e-39	0.238652	1	0.995	2.90725e-35	shared
Eif4g2	2.39183e-21	0.238187	0.976	0.871	4.19791e-17	shared
Elmo1	1.65109e-13	0.238184	0.607	0.42	2.87999e-09	other
Hs3st5	6.55019e-20	0.237258	0.357	0.162	1.14844e-15	shared
Rbbp7	3.37719e-13	0.236839	0.501	0.325	5.88677e-09	shared
Ucp2	1.33004e-16	0.235019	0.308	0.143	2.32678e-12	female specific
Scml4	5.96393e-25	0.233144	0.286	0.098	1.0478e-20	shared
Atp1b3	6.03402e-13	0.232308	0.622	0.439	1.05113e-08	shared
Rps6ka6	2.6891e-24	0.232299	0.276	0.094	4.72422e-20	shared
Rpl22	1.86003e-15	0.231371	0.9	0.736	3.25039e-11	shared
mt-Nd3	1.71654e-20	0.229504	0.964	0.859	3.01081e-16	shared
H2-Q2	2.84498e-22	0.229455	0.221	0.067	4.99436e-18	shared
Wdr89	2.64608e-18	0.228269	0.603	0.366	4.6354e-14	shared
Rxfp3	3.61982e-21	0.224137	0.156	0.034	6.35279e-17	other
1500009L16Rik	1.76085e-13	0.223851	0.667	0.48	3.07128e-09	shared
Ctnna2	1.72175e-11	0.222989	0.564	0.398	2.99188e-07	shared
Rprm	1.22675e-09	0.222811	0.212	0.11	2.12437e-05	shared
Rpl5	1.7584e-18	0.222492	0.953	0.865	3.08071e-14	other
Chml	4.51843e-27	0.219647	0.239	0.065	7.9452e-23	shared
Plxnc1	9.41711e-16	0.219389	0.608	0.388	1.64611e-11	shared
Hspa5	6.46263e-14	0.219222	0.633	0.426	1.12786e-09	shared
Gm9493	3.98437e-16	0.217544	0.387	0.211	6.96747e-12	shared
Eef1b2	2.44583e-16	0.216707	0.93	0.773	4.278e-12	shared
Rplp2	7.65417e-30	0.212283	1	0.994	1.3466e-25	other
Unc80	9.01664e-16	0.210794	0.845	0.661	1.57629e-11	shared
Oprk1	2.07735e-09	0.210318	0.488	0.335	3.59445e-05	female specific
mt-Nd4	1.85637e-27	0.209452	1	0.995	3.26462e-23	shared
Tcf4	3.3858e-11	0.208197	0.512	0.335	5.87978e-07	female specific
Rpl9-ps6	1.8386e-17	0.208182	0.425	0.225	3.21866e-13	shared
Galnt13	2.15202e-15	0.20776	0.403	0.218	3.76022e-11	shared
2010107E04Rik	1.49324e-12	0.207711	0.78	0.596	2.59958e-08	shared
Galnt14	1.0474e-22	0.205061	0.385	0.161	1.83914e-18	other
Rps10	3.83476e-21	0.2038	0.991	0.967	6.72961e-17	shared
Gfra1	1.12067e-14	0.203293	0.434	0.245	1.9568e-10	shared
Ak4	9.25363e-16	0.203209	0.409	0.219	1.61763e-11	other
Rpl12	2.51304e-20	0.202933	0.989	0.927	4.40737e-16	shared
Neo1	1.2133e-10	0.202649	0.378	0.233	2.10471e-06	shared
Negr1	1.77764e-12	0.202406	0.961	0.858	3.09417e-08	other
Reep5	4.50451e-17	0.202193	0.935	0.791	7.88289e-13	other
Rack1	2.07157e-12	0.200375	0.855	0.696	3.60536e-08	other
Rps4x	4.23034e-28	0.199567	1	0.998	7.44074e-24	shared
Gm1673	2.10449e-12	0.198993	0.913	0.808	3.66224e-08	female specific
Rpl30	5.97632e-21	0.198888	0.997	0.966	1.04855e-16	shared
Slitrk6	1.84209e-20	0.196893	0.174	0.046	3.23083e-16	shared
Vstm2b	9.84247e-12	0.19615	0.368	0.218	1.71092e-07	other
Stk19	3.69257e-11	0.195867	0.464	0.293	6.41214e-07	shared
Mmd	3.83589e-12	0.194031	0.67	0.473	6.67254e-08	other
Eef1a1	4.91883e-28	0.192326	1	1	8.65124e-24	other
Nexmif	9.03786e-11	0.191499	0.423	0.273	1.56834e-06	shared
Ralgps2	1.98139e-10	0.191174	0.447	0.289	3.43513e-06	shared
Gm16485	1.48673e-26	0.190976	0.213	0.051	2.61367e-22	shared
Sptssa	7.13645e-14	0.190343	0.583	0.374	1.24531e-09	other
Kcnk2	1.66826e-10	0.189574	0.656	0.452	2.89276e-06	other
Brinp2	1.14047e-12	0.189087	0.461	0.279	1.98601e-08	shared
Klf9	4.8087e-13	0.18871	0.412	0.237	8.3782e-09	other
Chpt1	3.61842e-13	0.187999	0.329	0.177	6.30691e-09	shared
Tspan2	2.70569e-16	0.187384	0.502	0.283	4.73198e-12	other
Ly6e	1.61435e-09	0.186552	0.654	0.477	2.79492e-05	other
Il13ra1	3.25144e-15	0.186491	0.392	0.209	5.67994e-11	female specific
Stum	2.67076e-11	0.186226	0.363	0.209	4.63884e-07	other
Chl1	8.57561e-06	0.185922	0.63	0.544	0.144533	other
Mgat5	4.06451e-13	0.18508	0.496	0.3	7.08282e-09	other
Fhad1	7.81006e-19	0.185	0.395	0.186	1.3684e-14	female specific
Rpl39	2.57206e-20	0.183793	0.998	0.977	4.51062e-16	shared
Rplp0	1.48676e-12	0.183519	0.953	0.856	2.58844e-08	other
Arhgap24	4.54192e-16	0.183473	0.303	0.139	7.94154e-12	female specific
Map2	4.64798e-12	0.179497	0.953	0.817	8.08469e-08	shared
Gm2000	4.74673e-11	0.17921	0.483	0.312	8.24032e-07	other
2010005H15Rik	6.66936e-15	0.178706	0.348	0.172	1.16494e-10	other
Tmem255a	4.72417e-11	0.178705	0.888	0.74	8.20163e-07	female specific
Scn9a	5.81573e-14	0.178563	0.543	0.329	1.01502e-09	female specific
Npy2r	8.71592e-15	0.178366	0.742	0.478	1.52232e-10	female specific
Arpc5	2.2717e-12	0.177323	0.689	0.484	3.95299e-08	other
Hsph1	1.60146e-10	0.177274	0.844	0.678	2.77726e-06	shared
Rpl10-ps3	3.3196e-12	0.177155	0.523	0.335	5.77511e-08	other
Rad23b	5.17601e-13	0.177073	0.758	0.559	9.01765e-09	shared
Sox5	4.86916e-17	0.175559	0.297	0.125	8.52054e-13	female specific
Polr1d	1.58702e-11	0.173835	0.782	0.595	2.75808e-07	other
Cacna2d1	2.83569e-13	0.173667	0.449	0.262	4.94373e-09	female specific
Saraf	1.92275e-11	0.173586	0.878	0.735	3.34039e-07	other
Plxna2	3.05294e-13	0.173231	0.613	0.399	5.32188e-09	other
Gabra3	9.69191e-10	0.173165	0.649	0.459	1.67893e-05	shared
mt-Nd1	4.37839e-20	0.172922	1	1	7.67707e-16	shared
Arfgef3	4.25743e-09	0.172654	0.864	0.706	7.35769e-05	shared
Rtn4	5.09258e-10	0.172347	0.863	0.727	8.82492e-06	shared
Hsp90b1	4.85698e-09	0.171784	0.785	0.608	8.39286e-05	shared
Slc17a8	1.75461e-11	0.171606	0.183	0.076	3.04881e-07	female specific
Prrt1	6.50687e-09	0.171394	0.559	0.397	0.0001124	other
Astn1	2.62809e-11	0.170977	0.837	0.682	4.56499e-07	shared
Sema3a	1.02444e-19	0.170413	0.19	0.055	1.79585e-15	other
Rps20	2.10233e-17	0.170274	0.994	0.97	3.67971e-13	shared
mt-Nd2	8.61127e-20	0.169027	0.995	0.991	1.50964e-15	shared
Rps15a	3.43509e-19	0.169009	1	0.991	6.01965e-15	shared
Mef2c	2.49891e-11	0.168889	0.259	0.132	4.34086e-07	other
Ogfrl1	1.16599e-12	0.168775	0.701	0.503	2.03034e-08	other
Fut8	9.30163e-11	0.167836	0.51	0.329	1.61402e-06	shared
Sdhaf4	3.36341e-14	0.16763	0.376	0.202	5.87083e-10	other
Irs2	1.70186e-12	0.166432	0.438	0.261	2.9626e-08	shared
Ecel1	4.4507e-08	0.165937	0.515	0.384	0.000765876	other
Usp51	1.18876e-12	0.164988	0.267	0.129	2.06986e-08	other
Zmat4	6.29734e-09	0.164497	0.447	0.303	0.000108786	shared
Mcfd2	2.08713e-12	0.164106	0.524	0.337	3.63223e-08	other
Pdia3	1.69814e-11	0.163837	0.496	0.322	2.95103e-07	shared
Rpl7a	2.62288e-13	0.16356	0.984	0.925	4.57325e-09	other
Egr2	3.18094e-24	0.163457	0.103	0.007	5.58795e-20	other
Enpp2	5.40917e-12	0.162776	0.262	0.128	9.4071e-08	other
Rpl23	7.08363e-19	0.16265	1	0.997	1.24119e-14	shared
Zfp462	7.80365e-12	0.162512	0.738	0.529	1.35682e-07	other
Rps3a1	8.14086e-21	0.161837	1	0.998	1.42815e-16	shared
Th	4.27429e-11	0.161627	0.212	0.097	7.42145e-07	female specific
Esyt3	8.04218e-16	0.161158	0.224	0.087	1.40601e-11	other
Txndc17	1.51198e-11	0.159826	0.652	0.455	2.62782e-07	other
As3mt	1.10204e-19	0.159609	0.306	0.122	1.93166e-15	other
Rpl17	1.25724e-25	0.159406	1	1	2.20922e-21	shared
Morn2	5.42102e-11	0.158823	0.479	0.301	9.41036e-07	other
Iqsec3	2.20236e-09	0.158364	0.569	0.41	3.81052e-05	other
Cdkl2	1.00196e-12	0.158029	0.564	0.356	1.74502e-08	shared
Ssr3	4.3908e-10	0.157512	0.664	0.483	7.60969e-06	other
Pou2f2	8.92162e-08	0.157212	0.561	0.392	0.00153291	female specific
Hsbp1	2.05762e-08	0.156808	0.872	0.714	0.000354589	shared
Syt6	1.44966e-06	0.156547	0.204	0.121	0.0246776	shared
Slc7a1	3.09121e-11	0.156469	0.444	0.274	5.36851e-07	female specific
Tcp1	1.23505e-08	0.156041	0.793	0.619	0.000213096	other
Rps13	1.55511e-15	0.155847	0.997	0.986	2.71786e-11	other
Peg3	6.57465e-16	0.15557	1	0.995	1.14951e-11	shared
Ptpn5	1.47402e-07	0.154844	0.607	0.454	0.00252941	other
Dlx1	2.94472e-08	0.154523	0.812	0.647	0.000507286	other
Rpl7	1.58187e-13	0.154326	0.984	0.944	2.75941e-09	other
Naaa	7.66496e-13	0.154179	0.291	0.147	1.33508e-08	other
Ikzf2	1.94621e-17	0.153466	0.179	0.055	3.40665e-13	other
Trp53inp1	1.17503e-19	0.1524	0.182	0.05	2.05947e-15	other
Neto2	1.66963e-10	0.151973	0.259	0.135	2.89497e-06	other
Etnk2	1.41983e-12	0.151229	0.288	0.141	2.47206e-08	other
Crtac1	5.74389e-13	0.15061	0.218	0.095	1.00064e-08	other
Nos1	4.92418e-08	0.149907	0.357	0.227	0.000847106	shared
Rufy3	3.27532e-09	0.149849	0.921	0.8	5.6627e-05	female specific
Snhg11	2.18929e-26	0.149685	1	1	3.84855e-22	female specific
Map2k1	2.67399e-08	0.148742	0.733	0.569	0.000460729	shared
Kcnq1ot1	1.59953e-08	0.148546	0.918	0.788	0.00027579	shared
Rpl29	7.00832e-14	0.148395	0.998	0.969	1.22302e-09	other
Mafa	1.35248e-10	0.148114	0.115	0.038	2.34601e-06	female specific
Hspa8	4.34202e-10	0.14803	0.978	0.938	7.52558e-06	other
Slitrk5	4.6057e-10	0.147736	0.477	0.3	7.98169e-06	shared
Lpp	2.02374e-15	0.147034	0.245	0.101	3.53628e-11	other
Uqcrb	5.02085e-09	0.146701	0.692	0.509	8.67553e-05	shared
Dlx2	5.34699e-14	0.145872	0.48	0.277	9.33263e-10	other
Rps2	1.65692e-16	0.145546	1	0.978	2.89829e-12	other
Dbpht2	3.79211e-11	0.145207	0.727	0.526	6.58462e-07	female specific
5330434G04Rik	1.10335e-08	0.144492	0.717	0.538	0.000190384	shared
Shisa2	3.35481e-14	0.144123	0.139	0.041	5.85616e-10	shared
Coch	9.69414e-11	0.144083	0.183	0.081	1.68203e-06	other
Gpbp1	1.44782e-08	0.143564	0.578	0.409	0.000249705	shared
Mxra7	4.55437e-13	0.143445	0.273	0.13	7.93554e-09	female specific
Znrf2	1.85774e-13	0.143325	0.235	0.103	3.23991e-09	other
Rps7	9.23199e-17	0.143213	1	0.996	1.61523e-12	other
Socs2	4.11125e-06	0.143099	0.256	0.164	0.0695952	other
Cdkl5	1.17059e-10	0.143074	0.472	0.296	2.03074e-06	shared
Tnxb	1.96165e-25	0.142827	0.111	0.009	3.44682e-21	shared
Pds5b	6.20766e-10	0.142349	0.686	0.475	1.07548e-05	other
Rpl23a	2.79262e-18	0.142314	1	0.997	4.89155e-14	other
Rev3l	1.90899e-08	0.142028	0.452	0.3	0.000328996	other
Pls3	2.98137e-09	0.141387	0.37	0.23	5.15538e-05	other
Rpl31	1.3745e-15	0.141027	1	0.995	2.40236e-11	shared
Cnih1	2.87693e-09	0.140593	0.529	0.368	4.97537e-05	other
Fam183b	7.69672e-14	0.140568	0.295	0.14	1.343e-09	other
Il1rap	1.53135e-09	0.13966	0.28	0.155	2.65154e-05	shared
Syne2	2.54458e-13	0.138816	0.237	0.105	4.43698e-09	other
Sowaha	1.84071e-13	0.138281	0.177	0.066	3.21039e-09	female specific
Tmod1	1.89955e-09	0.137965	0.316	0.183	3.28737e-05	female specific
Phyhipl	1.29958e-08	0.137085	0.521	0.356	0.000224191	shared
Elovl5	2.96341e-12	0.13699	0.259	0.123	5.15574e-08	other
Mpped2	1.89977e-13	0.13644	0.303	0.147	3.313e-09	female specific
Rps27a	9.50398e-18	0.135738	1	0.998	1.66424e-13	other
Camta1	2.46327e-09	0.135303	0.961	0.847	4.26121e-05	shared
Npm1	8.28517e-09	0.135272	0.961	0.899	0.000143019	shared
Pip4k2a	1.14389e-07	0.134941	0.185	0.098	0.00196394	shared
Slc4a8	6.55232e-09	0.133383	0.389	0.244	0.000113178	female specific
Pop5	1.2271e-06	0.133253	0.542	0.391	0.0209085	other
Lhfpl3	1.05895e-07	0.133007	0.246	0.144	0.00181843	shared
Pik3r3	3.67169e-12	0.132977	0.286	0.142	6.38727e-08	other
Hlf	3.15548e-09	0.132192	0.575	0.392	5.45582e-05	female specific
Opn3	1.60209e-17	0.131716	0.125	0.027	2.80479e-13	shared
Rpl18	3.02839e-08	0.131436	0.961	0.909	0.00052161	shared
Cnot7	8.72865e-08	0.131071	0.577	0.417	0.00149984	other
Minos1	9.41846e-07	0.130824	0.861	0.705	0.0160698	shared
Rgma	1.00856e-10	0.130659	0.164	0.067	1.74985e-06	female specific
Dlgap1	1.66995e-06	0.130479	0.398	0.28	0.0284092	shared
Snrpb	2.579e-09	0.130178	0.322	0.189	4.46115e-05	female specific
4833439L19Rik	7.68049e-09	0.13015	0.57	0.395	0.000132604	other
Tmem29	9.74891e-08	0.130107	0.548	0.386	0.00167457	other
Rps3	2.30089e-15	0.129875	0.998	0.998	4.02012e-11	female specific
Tcaf1	1.31411e-06	0.128931	0.817	0.676	0.0223859	shared
Foxg1	5.21438e-08	0.128321	0.596	0.42	0.000896978	female specific
Klhl24	1.07372e-06	0.127975	0.55	0.41	0.0183037	female specific
Dgkd	1.06988e-09	0.127865	0.318	0.183	1.85304e-05	other
Kif5b	4.535e-06	0.126786	0.799	0.672	0.0767049	other
Mettl9	8.59534e-08	0.12652	0.572	0.41	0.00147702	other
Ccnb1ip1	0.00022909	0.126477	0.412	0.32	1	other
Rpl36a-ps1	1.42552e-08	0.125728	0.237	0.133	0.000245874	other
5330417C22Rik	8.63626e-11	0.125462	0.464	0.285	1.49874e-06	female specific
Taf15	1.6612e-09	0.125104	0.439	0.278	2.87588e-05	other
Per3	1.9071e-08	0.124577	0.501	0.334	0.000328688	female specific
Spg20	1.45197e-10	0.124469	0.286	0.154	2.5183e-06	other
Rbms3	9.567e-07	0.124172	0.37	0.253	0.0163203	shared
Nectin3	2.1938e-07	0.123329	0.205	0.115	0.00375951	other
Fsd1l	1.04811e-08	0.123273	0.404	0.256	0.000180872	other
Tsr2	3.46608e-07	0.123041	0.547	0.388	0.00593011	shared
Tspan6	3.88376e-09	0.122955	0.387	0.238	6.71231e-05	other
Ola1	4.74058e-08	0.122418	0.476	0.327	0.000815569	shared
Selenof	7.80522e-07	0.121938	0.603	0.445	0.0133266	shared
Trp53i11	1.47388e-10	0.121832	0.272	0.141	2.55616e-06	other
Rps6ka3	9.21073e-14	0.121816	0.15	0.048	1.607e-09	other
Pnmal1	2.77454e-06	0.121724	0.829	0.667	0.0470757	other
Nfasc	1.21364e-06	0.121534	0.603	0.439	0.0206828	other
Srsf3	2.62697e-07	0.121018	0.817	0.651	0.00449921	other
Enox2	4.13139e-10	0.120967	0.179	0.081	7.16094e-06	other
Rps9	1.78149e-09	0.120921	1	0.984	3.08359e-05	other
Cers5	1.05866e-08	0.120647	0.31	0.183	0.000182683	female specific
Hmgn2	2.52557e-05	0.120153	0.75	0.62	0.422401	other
Ube2r2	1.00427e-06	0.12015	0.727	0.556	0.0171259	other
Cap2	7.54021e-08	0.12002	0.403	0.26	0.00129624	shared
Hmgcr	2.89458e-06	0.119957	0.476	0.349	0.0490921	other
Cacul1	7.69546e-07	0.119885	0.51	0.365	0.01314	shared
Pdcd4	7.13592e-07	0.119531	0.795	0.645	0.0121867	female specific
Rasd1	1.77506e-12	0.119107	0.093	0.022	3.08985e-08	female specific
Chst11	5.15278e-10	0.119008	0.272	0.147	8.92874e-06	shared
Snn	6.63829e-09	0.11884	0.504	0.336	0.00011465	shared
R3hdm1	4.6787e-06	0.118208	0.768	0.612	0.0791261	other
Fndc3a	9.63834e-09	0.118124	0.73	0.545	0.000166339	female specific
H3f3a	1.44057e-06	0.11788	0.736	0.553	0.0245258	other
Ralgapa1	6.74429e-07	0.117459	0.466	0.325	0.0115193	other
1110008P14Rik	6.26722e-06	0.117129	0.698	0.537	0.105822	other
Cdr2	2.53177e-14	0.116883	0.152	0.048	4.41972e-10	other
Cstf2	3.32919e-07	0.116402	0.468	0.321	0.00569692	shared
Dhx9	1.22557e-06	0.116375	0.406	0.278	0.0208837	other
Lin7c	5.56359e-08	0.116273	0.531	0.361	0.000956882	female specific
Me1	2.61225e-09	0.116115	0.243	0.129	4.51815e-05	other
Rngtt	1.63279e-08	0.116045	0.313	0.19	0.000281492	other
Rps27l	4.09591e-08	0.115973	0.417	0.264	0.000705029	other
Tesc	7.96989e-09	0.11547	0.186	0.09	0.000137584	female specific
Abhd17b	1.88362e-09	0.115143	0.336	0.195	3.25998e-05	other
Rmst	2.02551e-07	0.115136	0.681	0.488	0.00347274	other
Alg10b	8.58957e-08	0.114567	0.362	0.233	0.00147612	female specific
Mat2a	3.17439e-05	0.114487	0.793	0.644	0.529965	other
Hap1	1.34434e-08	0.114364	0.995	0.977	0.000231899	female specific
mt-Cytb	6.51703e-13	0.114358	1	1	1.1352e-08	shared
Prlr	6.8765e-05	0.114309	0.807	0.68	1	other
Jmjd1c	3.40468e-07	0.113833	0.518	0.359	0.00582541	other
Pard3	2.08246e-07	0.11309	0.299	0.184	0.00356996	other
Mtpn	1.65795e-06	0.112804	0.907	0.754	0.0282067	other
Hmgcs1	9.32382e-05	0.112452	0.615	0.489	1	other
Gm42851	2.45553e-07	0.111886	0.318	0.198	0.00420607	female specific
Btbd11	3.02627e-09	0.111692	0.42	0.254	5.23273e-05	other
Bmp3	4.82911e-09	0.111666	0.128	0.051	8.34518e-05	other
Tmsb4x	1.4745e-08	0.11145	1	0.998	0.000254292	shared
Rpl19	9.24651e-13	0.111343	1	0.998	1.61046e-08	other
9530068E07Rik	1.35438e-06	0.110894	0.548	0.396	0.0230678	female specific
Zcchc12	1.21558e-06	0.110885	0.984	0.913	0.0207147	female specific
Smim10l1	7.47239e-06	0.110719	0.889	0.732	0.126022	other
Arsb	1.19467e-07	0.110613	0.423	0.281	0.00205089	other
Anp32b	4.94557e-06	0.110566	0.491	0.356	0.0836049	other
Sgcb	1.23796e-08	0.110514	0.346	0.208	0.000213585	other
Nudt4	5.45886e-08	0.110239	0.332	0.205	0.000938924	shared
Dapk1	1.79622e-07	0.109867	0.493	0.331	0.00308071	other
Ncam1	1.17674e-07	0.109655	1	0.982	0.00202023	female specific
Eif1	7.93805e-11	0.109646	1	0.991	1.37765e-06	other
Rps25	6.22705e-11	0.109611	1	0.997	1.08089e-06	other
Abat	8.33674e-05	0.109552	0.806	0.69	1	other
Sphkap	1.66489e-07	0.109442	0.463	0.314	0.00285612	other
March11	7.5598e-09	0.109275	0.188	0.092	0.000130528	other
Gpr158	8.56432e-10	0.109242	0.336	0.193	1.48368e-05	other
Rpl26	1.06984e-13	0.109044	1	1	1.86644e-09	other
Zfp157	1.93754e-06	0.10896	0.442	0.31	0.0329363	other
Anks1b	1.47545e-06	0.108635	0.716	0.566	0.0251151	other
Ccdc85a	1.49511e-08	0.108515	0.305	0.182	0.000257832	shared
Ube2e1	2.92305e-07	0.108432	0.61	0.428	0.00500397	shared
Smc5	3.67418e-08	0.108365	0.336	0.206	0.00063262	other
Apc	1.58744e-07	0.108223	0.6	0.427	0.00272341	female specific
1110017D15Rik	2.59617e-10	0.108136	0.201	0.094	4.50047e-06	female specific
Bicd1	4.71842e-05	0.107888	0.698	0.549	0.784956	other
Zfp292	2.88535e-06	0.107857	0.487	0.35	0.0489384	other
Mfsd6	0.000941014	0.107586	0.491	0.409	1	other
Rpl9	9.35595e-15	0.107423	1	0.999	1.63392e-10	other
Papola	1.17038e-05	0.107219	0.633	0.491	0.196729	other
Krt222	2.02548e-09	0.107115	0.193	0.094	3.5049e-05	shared
Ormdl1	8.76032e-09	0.106819	0.193	0.097	0.000151212	other
Usp48	3.85682e-08	0.10673	0.349	0.218	0.000664029	other
Pbrm1	1.84451e-06	0.106603	0.731	0.558	0.0313621	other
Fam92a	2.33968e-06	0.106151	0.427	0.299	0.0397417	shared
Sytl4	6.78294e-11	0.105809	0.052	0.006	1.17732e-06	shared
Nap1l5	4.38247e-08	0.105797	0.997	0.998	0.00075418	shared
Plcxd3	2.67594e-07	0.105789	0.417	0.273	0.00458282	shared
Gadd45a	1.37133e-10	0.105472	0.12	0.041	2.37857e-06	other
Ap1s2	1.14588e-05	0.104943	0.619	0.459	0.192657	other
Tmx2	8.99162e-06	0.104912	0.773	0.601	0.1515	other
Large1	1.0875e-07	0.104832	0.359	0.228	0.00186725	shared
Rpl27-ps3	7.74895e-08	0.104342	0.302	0.184	0.00133189	other
Reps2	4.23266e-05	0.104134	0.542	0.427	0.704653	other
Rps21	2.01149e-10	0.104031	1	0.997	3.48713e-06	other
Klhl7	4.79143e-06	0.103928	0.583	0.417	0.0810134	other
Hspa13	2.62883e-06	0.103918	0.591	0.427	0.0446218	female specific
Vat1	6.60414e-06	0.103208	0.87	0.75	0.111465	other
Hspa4	1.63426e-05	0.103155	0.615	0.484	0.274147	other
N4bp2l2	9.11933e-07	0.102777	0.534	0.385	0.0155631	female specific
Cetn2	6.79785e-08	0.102751	0.395	0.253	0.00116903	other
Tmem50a	2.39742e-07	0.102659	0.645	0.469	0.0041075	female specific
Airn	1.0098e-14	0.102647	0.082	0.012	1.76342e-10	other
Gt(ROSA)26Sor	1.67623e-07	0.10239	0.294	0.179	0.00287541	female specific
Ywhah	2.78308e-06	0.10217	0.987	0.953	0.0472177	shared
St3gal1	5.31085e-08	0.102124	0.163	0.079	0.00091352	other
Rnf152	2.16489e-06	0.102072	0.158	0.084	0.0367836	other
Bmi1	1.08482e-06	0.102029	0.295	0.186	0.0184897	other
Sema6a	3.40655e-08	0.101916	0.37	0.226	0.000586642	female specific
Serinc1	1.36743e-06	0.101513	0.975	0.899	0.0232873	shared
Nell1	1.13725e-05	0.101353	0.423	0.302	0.191252	other
Snx6	7.57067e-08	0.101045	0.278	0.165	0.0013014	other
Rab40b	1.77348e-09	0.100963	0.153	0.066	3.06989e-05	other
Fyn	1.35453e-05	0.100796	0.471	0.344	0.227479	other
Tspan17	9.26833e-07	0.100793	0.359	0.235	0.0158146	other
2300009A05Rik	6.55457e-06	0.100488	0.589	0.434	0.110635	other
Itfg1	0.00167483	0.100182	0.678	0.576	1	other
2810474O19Rik	1.06231e-06	0.100052	0.283	0.178	0.0181102	female specific
Wnt4	1.40157e-07	0.0999085	0.13	0.059	0.00240552	other
Htr2c	3.29119e-06	0.0997237	0.333	0.221	0.0557627	other
Nbea	6.70844e-05	0.0995969	0.758	0.58	1	other
Pcsk2	0.00102627	0.0992959	0.585	0.492	1	other
Lypd6	7.01926e-05	0.0988736	0.253	0.168	1	other
Cetn3	1.39925e-07	0.0986094	0.645	0.457	0.00240167	other
Aldh9a1	2.96382e-08	0.0985024	0.19	0.096	0.000510517	other
Sept11	1.56182e-05	0.0984846	0.524	0.382	0.262074	other
Rpl35a	2.42591e-11	0.0984014	1	0.999	4.21429e-07	other
Rpl34	6.62743e-09	0.0982562	1	0.995	0.000114469	other
Mal2	6.86245e-06	0.0979898	0.466	0.339	0.115797	other
Rps8	2.86209e-13	0.0978926	1	1	4.98949e-09	other
Rps17	1.68265e-07	0.0978736	0.997	0.98	0.00288607	other
Pcdh10	1.78893e-06	0.0978122	0.765	0.574	0.0304207	other
Maob	1.08418e-07	0.0978106	0.15	0.071	0.00186165	other
Med13	1.55942e-07	0.0975184	0.329	0.204	0.0026755	other
Nfkbia	2.92535e-07	0.0974816	0.204	0.112	0.00500733	other
Ndufaf4	2.73018e-06	0.0974673	0.433	0.298	0.0463284	other
Sorcs3	5.32539e-06	0.097286	0.482	0.337	0.0899992	other
Gabrg1	3.38487e-06	0.0972347	0.521	0.384	0.0573363	other
Nap1l1	0.000293653	0.0971137	0.874	0.733	1	other
Hipk2	7.35855e-08	0.0970328	0.254	0.143	0.00126523	other
Mfap3l	6.6514e-09	0.0968575	0.15	0.066	0.00011487	other
Zfp120	2.92391e-06	0.0967892	0.212	0.127	0.0495807	other
Npy5r	1.00229e-09	0.0963422	0.185	0.084	1.73607e-05	other
Rassf8	1.02692e-05	0.0962859	0.404	0.282	0.172831	other
Nrcam	6.3657e-07	0.0960575	0.42	0.285	0.0108771	other
Eloc	1.86967e-06	0.0956363	0.626	0.456	0.0317863	other
Zfp667	4.42667e-07	0.0951052	0.306	0.193	0.00756872	other
Polr2k	2.89722e-06	0.0950287	0.564	0.411	0.049134	other
Dnaja1	0.00027164	0.0947884	0.845	0.698	1	other
Gfod1	1.04387e-07	0.0946351	0.24	0.137	0.00179264	other
Gpc5	1.33279e-09	0.0945891	0.15	0.062	2.30785e-05	other
Arpc3	1.85042e-06	0.0944994	0.524	0.367	0.0314608	other
Krtcap2	1.33701e-06	0.0941959	0.566	0.406	0.0227732	other
mt-Co3	7.08883e-12	0.0941423	1	1	1.23268e-07	other
Mbd5	2.82745e-07	0.0940755	0.354	0.229	0.00484087	other
Hnrnpa2b1	1.16788e-05	0.0939157	0.921	0.814	0.196333	other
Nkx2-1	4.11443e-08	0.0939055	0.299	0.169	0.000708176	other
Spag9	0.000140006	0.0938001	0.809	0.665	1	other
Cd59a	2.35961e-06	0.0937763	0.177	0.1	0.0400756	other
Stbd1	1.01715e-14	0.0935926	0.081	0.012	1.77614e-10	other
Amy1	2.35255e-07	0.0935178	0.25	0.145	0.00403086	other
Nek7	1.98354e-07	0.0934333	0.27	0.159	0.00340097	other
Nudt21	9.28469e-06	0.0932902	0.536	0.39	0.15641	other
AF529169	4.35843e-07	0.0929584	0.114	0.05	0.00745248	other
Srsf6	2.8124e-06	0.0929245	0.548	0.384	0.0477039	other
4930570G19Rik	9.98856e-10	0.092879	0.201	0.095	1.73022e-05	other
Sos1	1.03411e-06	0.0924743	0.501	0.353	0.0176325	other
Atrx	0.000139745	0.0922737	0.619	0.483	1	other
Lrrtm2	1.18224e-05	0.0921426	0.403	0.285	0.198699	other
Cisd3	8.96676e-07	0.0921133	0.37	0.243	0.0153036	other
Baiap2	0.000152329	0.0920258	0.439	0.335	1	other
A730046J19Rik	1.99105e-14	0.0920054	0.058	0.004	3.47598e-10	other
Mical2	1.68028e-08	0.0919392	0.245	0.132	0.000289664	other
Dstn	1.32015e-05	0.0918106	0.72	0.548	0.221772	other
Slco3a1	1.71807e-06	0.091756	0.267	0.167	0.0292176	other
Pnma3	7.23035e-06	0.0917314	0.49	0.359	0.121969	other
Zfp664	9.83687e-06	0.091587	0.493	0.36	0.165643	other
Tmem209	1.58039e-09	0.0913785	0.232	0.118	2.73628e-05	other
Ddost	3.59426e-07	0.0913694	0.395	0.255	0.00614835	other
March8	1.3953e-06	0.0913476	0.422	0.288	0.0237591	other
Bid	3.4018e-09	0.0911765	0.167	0.076	5.88035e-05	other
Sucla2	6.90658e-06	0.091175	0.499	0.363	0.116535	other
B4gat1	4.29116e-06	0.0908685	0.362	0.25	0.0726108	other
Oaz2	0.000138149	0.0907617	0.897	0.764	1	other
Paip2	0.000133116	0.0907183	0.79	0.637	1	other
Tax1bp1	3.89912e-05	0.0906438	0.384	0.277	0.649749	other
Ezr	1.96722e-09	0.0906403	0.131	0.051	3.40428e-05	other
Eif3e	2.39048e-05	0.0905783	0.788	0.637	0.400071	other
Rpsa	4.21402e-06	0.0905004	0.986	0.968	0.0713223	other
Tor1aip2	3.25255e-07	0.0903391	0.352	0.223	0.00556642	other
Cfap36	8.61278e-07	0.0902347	0.458	0.314	0.014702	other
Cisd2	1.01989e-05	0.090048	0.543	0.399	0.171657	other
Ddx10	7.49903e-08	0.0899689	0.15	0.071	0.00128923	other
Focad	4.58596e-08	0.089924	0.175	0.087	0.00078906	other
Srp72	9.21732e-06	0.0899156	0.66	0.484	0.155284	other
Tbca	0.000502732	0.0898793	0.896	0.781	1	other
Icam5	2.70118e-08	0.0898734	0.126	0.053	0.000465387	other
Slc29a4	2.97556e-09	0.0894167	0.273	0.147	5.14564e-05	other
Plppr4	0.00015024	0.0893225	0.79	0.653	1	other
Ppa1	2.25359e-06	0.0890659	0.341	0.229	0.0382862	other
Immp1l	1.62359e-06	0.0890083	0.313	0.203	0.0276269	other
Ly6h	9.45266e-05	0.0889563	0.968	0.928	1	other
Tyms	1.87228e-07	0.0887818	0.125	0.055	0.00321078	other
Mad2l2	1.84116e-08	0.0885251	0.193	0.096	0.000317343	other
Arfgef1	8.93478e-05	0.0883292	0.422	0.316	1	other
Fry	0.00024991	0.0882888	0.667	0.53	1	other
Rragd	1.88886e-07	0.0882463	0.256	0.148	0.00323902	other
Eef1g	9.58414e-07	0.0881328	0.998	0.977	0.0163486	other
Cct8	1.32184e-05	0.0881265	0.555	0.421	0.22203	other
Fkbp2	9.42941e-05	0.0880514	0.657	0.518	1	other
Tmem184c	5.63569e-06	0.087889	0.278	0.179	0.0952262	other
Arl1	8.26875e-06	0.0878646	0.513	0.366	0.139378	other
Gdf11	3.91303e-08	0.0878644	0.227	0.123	0.000673668	other
App	0.000121698	0.0878388	0.965	0.916	1	other
Nr3c1	0.000364515	0.0878115	0.583	0.441	1	other
Napb	0.0451052	0.0876483	0.93	0.865	1	other
Jpt1	5.75182e-05	0.0875944	0.637	0.484	0.954802	other
Rbm18	2.72299e-07	0.0875787	0.398	0.261	0.00466284	other
Cxxc5	1.40566e-07	0.0874569	0.251	0.144	0.00241239	other
Msantd4	1.99982e-05	0.0874385	0.453	0.325	0.33509	other
Smim7	1.44751e-07	0.0874148	0.414	0.269	0.00248408	other
Chrna3	9.3282e-15	0.087146	0.101	0.02	1.62917e-10	other
Bok	2.56547e-06	0.0870078	0.235	0.14	0.043554	other
Rpl4	6.61226e-07	0.0869171	0.998	0.982	0.0112944	other
Nxn	1.82326e-10	0.0868817	0.106	0.033	3.16117e-06	other
Acvr2a	3.03565e-06	0.0864978	0.267	0.168	0.0514604	other
Tmem50b	0.000263113	0.0863756	0.479	0.365	1	other
Nanos1	3.96648e-07	0.0863514	0.305	0.19	0.00678387	other
Cep19	1.50596e-07	0.086349	0.472	0.315	0.00258408	other
Idnk	1.1273e-06	0.0862683	0.357	0.232	0.0192126	other
Pcbd1	1.32059e-05	0.0860356	0.627	0.471	0.221833	other
Twsg1	2.31159e-09	0.0859997	0.185	0.087	3.99929e-05	other
2610301B20Rik	1.70213e-06	0.0858479	0.423	0.286	0.0289499	other
Phyh	7.93492e-09	0.085835	0.24	0.128	0.000136988	other
Pcdhb7	5.35257e-05	0.0858264	0.114	0.061	0.889062	other
Emc2	3.6227e-08	0.0857067	0.276	0.159	0.000623792	other
Dtx1	3.56049e-05	0.0855346	0.438	0.316	0.593748	other
Gosr2	9.69206e-06	0.0854761	0.381	0.261	0.163234	other
Fem1b	0.000179964	0.0854226	0.686	0.538	1	other
Hprt	2.14095e-05	0.0854143	0.667	0.502	0.35861	other
Med9	3.93809e-05	0.0851718	0.201	0.125	0.656086	other
Cdv3	0.000122004	0.0850948	0.564	0.434	1	other
Raph1	4.46262e-05	0.0850408	0.592	0.45	0.74267	other
Tubb5	0.00224048	0.084934	0.907	0.809	1	other
Rps16	1.8394e-08	0.084902	1	0.998	0.000317057	other
Igsf1	3.3154e-06	0.0848922	0.164	0.09	0.0561695	other
Rpl8	2.92498e-07	0.0847103	1	0.998	0.00500698	other
Fam222a	1.18466e-09	0.0844492	0.163	0.07	2.05159e-05	other
Cspg5	0.000223078	0.0843811	0.706	0.565	1	other
Prnp	5.14242e-05	0.0842355	0.972	0.921	0.85467	other
Actl6a	1.15966e-05	0.0840745	0.302	0.199	0.194961	other
6330403K07Rik	9.25374e-07	0.0840545	0.995	0.991	0.0157906	other
Myo10	2.6022e-06	0.0838962	0.167	0.09	0.044175	other
Rps15	1.4369e-06	0.0836128	1	0.997	0.0244647	other
Ccp110	1.04904e-06	0.083597	0.333	0.211	0.0178862	other
Dusp18	4.21952e-07	0.0835255	0.221	0.126	0.00721537	other
Gprasp1	7.25026e-05	0.0834138	0.965	0.888	1	other
Dcp2	8.95665e-06	0.0832141	0.422	0.293	0.15092	other
Kbtbd11	5.13252e-06	0.0831627	0.42	0.3	0.0867499	other
Swi5	0.000189391	0.0829362	0.804	0.68	1	other
Mgat1	5.67514e-05	0.082866	0.318	0.222	0.94213	other
Klhdc8b	1.90066e-07	0.0827812	0.299	0.178	0.00325907	other
Anxa6	3.67995e-09	0.0827371	0.248	0.13	6.3608e-05	other
Ube2d2a	0.000698952	0.0826727	0.769	0.63	1	other
Sntg1	9.24175e-08	0.0825947	0.197	0.104	0.00158773	other
Wnk1	1.13867e-05	0.082589	0.577	0.416	0.191478	other
Zfp622	4.70698e-05	0.0825034	0.521	0.382	0.783101	other
Smap1	1.12972e-05	0.082477	0.458	0.324	0.190007	other
Pdik1l	7.20597e-07	0.082365	0.254	0.151	0.0123056	other
Kpnb1	0.000166868	0.0823334	0.551	0.423	1	other
Gstm7	6.40855e-07	0.082183	0.267	0.158	0.010949	other
Palmd	3.29653e-07	0.0820087	0.114	0.049	0.00564136	other
Kcnip4	1.01556e-06	0.0817933	0.235	0.14	0.0173172	other
Synj1	0.00208908	0.0816982	0.899	0.81	1	other
Rab27a	6.37746e-08	0.0816452	0.229	0.125	0.0010968	other
Gspt2	6.47536e-06	0.0816402	0.235	0.145	0.109317	other
Jtb	0.00013	0.0816069	0.447	0.332	1	other
Lin7a	7.62156e-06	0.0815262	0.506	0.367	0.128515	other
Sec23b	9.78862e-06	0.0814651	0.179	0.105	0.16484	other
Psd3	1.56244e-05	0.081317	0.539	0.39	0.262161	other
B3glct	3.32916e-09	0.0812122	0.095	0.03	5.75545e-05	other
Fktn	7.72041e-05	0.0811855	0.374	0.27	1	other
A230057D06Rik	0.00034256	0.0809069	0.515	0.392	1	other
Ppa2	1.71698e-06	0.0809021	0.202	0.115	0.0292008	other
Wdr6	0.000211035	0.0808539	0.924	0.842	1	other
Npy1r	1.68271e-05	0.0808415	0.251	0.161	0.282225	other
Dopey1	4.56395e-06	0.0808347	0.406	0.279	0.0771901	other
Cmpk1	1.32839e-05	0.0808245	0.564	0.413	0.223117	other
Rmnd5a	0.000127967	0.0808125	0.368	0.268	1	other
Arid4a	1.51114e-05	0.0808098	0.684	0.526	0.253629	other
Pdk1	3.50618e-05	0.0807714	0.346	0.243	0.584866	other
Rpl10a	6.93793e-06	0.0807128	0.991	0.971	0.117057	other
Rpl6	2.18045e-07	0.080678	1	1	0.00373685	other
Tmem30a	0.00264044	0.0806538	0.815	0.693	1	other
Rpl14	4.18964e-07	0.0806266	1	1	0.0071647	other
Fndc3b	2.63828e-06	0.0806144	0.321	0.207	0.0447769	other
Ube2v2	0.000100472	0.0805603	0.678	0.532	1	other
Eif4g3	0.000558352	0.0805376	0.717	0.587	1	other
Atat1	0.000225063	0.0804963	0.455	0.333	1	other
Cux1	2.25513e-06	0.0804626	0.37	0.245	0.0383101	other
Gnpda2	2.73225e-06	0.0803998	0.227	0.135	0.0463608	other
Lima1	6.41825e-06	0.0801744	0.156	0.085	0.108359	other
Sec61a1	2.38427e-05	0.0800949	0.455	0.325	0.399056	other
Zfp68	6.82115e-06	0.079954	0.22	0.133	0.115107	other
Smc6	6.94031e-05	0.0799471	0.64	0.492	1	other
Slbp	6.9536e-07	0.0799357	0.392	0.257	0.0118761	other
Zdhhc22	1.27129e-06	0.0797123	0.393	0.263	0.0216578	other
Rprd1a	0.000399229	0.0796876	0.501	0.388	1	other
Rpl21	9.2215e-08	0.0796851	1	1	0.00158435	other
Rpl15	0.000106739	0.0796315	0.994	0.969	1	other
Timm8b	0.00319903	0.079589	0.91	0.81	1	other
Ergic2	3.14414e-06	0.0792372	0.401	0.271	0.0532932	other
Slitrk4	3.34028e-05	0.0791761	0.248	0.163	0.557359	other
Fam171b	0.000385345	0.0791692	0.844	0.722	1	other
Hrk	1.86122e-05	0.0790284	0.22	0.137	0.311978	other
Pnpt1	4.91873e-07	0.0789454	0.171	0.089	0.00840807	other
Eif1a	0.000115509	0.0788997	0.45	0.335	1	other
Sumo2	1.53208e-05	0.0787847	0.932	0.838	0.257099	other
Gtf2a2	3.03128e-06	0.0787656	0.48	0.338	0.0513893	other
Irak1	2.00476e-05	0.078517	0.436	0.312	0.335897	other
Scrn1	0.000761523	0.0784548	0.78	0.672	1	other
Disp2	0.000136064	0.0782654	0.91	0.769	1	other
Il1rapl2	1.96073e-06	0.0782344	0.111	0.051	0.0333265	other
Trp53inp2	1.67988e-05	0.0778738	0.316	0.214	0.281767	other
Ybx1	0.00095641	0.0778629	0.592	0.471	1	other
Chic1	1.57217e-06	0.0778354	0.431	0.293	0.0267568	other
Nedd4	0.00264689	0.0777021	0.923	0.817	1	other
Snrpd1	8.94878e-05	0.077553	0.464	0.348	1	other
Rps6	2.51315e-06	0.0775404	1	0.998	0.0426683	other
Ptprm	6.58515e-07	0.0774132	0.182	0.098	0.0112488	other
Slc39a6	6.17714e-05	0.0773045	0.477	0.346	1	other
Fam8a1	0.000974454	0.0772841	0.649	0.509	1	other
Tor1b	1.07436e-05	0.0771608	0.259	0.165	0.180761	other
Pts	2.43127e-06	0.0769779	0.283	0.178	0.041283	other
Trappc6b	0.00045736	0.076967	0.76	0.604	1	other
Tmem132b	0.00188592	0.0768459	0.39	0.303	1	other
Sqle	6.65167e-06	0.076667	0.269	0.168	0.112254	other
Zfp944	1.86768e-07	0.076632	0.133	0.061	0.00320306	other
Pgrmc2	0.000229164	0.0766248	0.589	0.45	1	other
Rhoc	9.73644e-12	0.0764891	0.093	0.023	1.69258e-07	other
Hs2st1	0.000126745	0.076188	0.449	0.331	1	other
Commd8	1.65793e-05	0.0761219	0.414	0.295	0.278101	other
Imp3	2.49881e-05	0.0761134	0.395	0.278	0.418076	other
Irak1bp1	3.51988e-05	0.0758921	0.363	0.254	0.587115	other
Gm27199	1.41616e-05	0.0758136	0.338	0.228	0.237787	other
Erc1	7.7959e-06	0.0757342	0.374	0.253	0.131447	other
Spag6l	9.59029e-07	0.0757089	0.115	0.052	0.0163582	other
Rnf115	0.00012985	0.075599	0.327	0.232	1	other
Them4	3.79904e-05	0.0755317	0.348	0.238	0.633224	other
Tub	0.00287297	0.0755164	0.834	0.688	1	other
Tnik	0.00175208	0.0754174	0.788	0.661	1	other
Creb3l1	1.14291e-10	0.075332	0.068	0.013	1.98284e-06	other
Uba3	1.88948e-05	0.0752812	0.363	0.254	0.316677	other
Pds5a	1.67568e-06	0.0751979	0.295	0.185	0.0285033	other
Aff4	0.000830951	0.0750358	0.833	0.686	1	other
Spcs1	2.24891e-05	0.0748495	0.589	0.436	0.376535	other
Gm11361	3.311e-05	0.07481	0.114	0.06	0.55254	other
Gdi2	0.000762533	0.0747882	0.725	0.59	1	other
3110043O21Rik	3.19587e-07	0.074786	0.294	0.179	0.00546973	other
Bax	0.000177563	0.0747102	0.449	0.337	1	other
Fbxo10	0.000355783	0.0745878	0.536	0.402	1	other
Dpp6	0.000238175	0.0745868	0.807	0.665	1	other
Ttc9	0.000398709	0.0745341	0.403	0.294	1	other
Fam98b	6.61184e-06	0.0744367	0.295	0.19	0.111588	other
Tgfbr1	7.25991e-07	0.0743135	0.136	0.065	0.012397	other
Kcnmb4	1.01746e-07	0.0742614	0.212	0.112	0.00174739	other
Plppr3	7.08813e-05	0.0742416	0.466	0.347	1	other
Srsf12	1.12066e-05	0.0741851	0.346	0.234	0.188494	other
Phf3	0.000144636	0.0741741	0.621	0.465	1	other
Cox20	0.000137821	0.0740855	0.463	0.338	1	other
Armc6	4.12605e-06	0.0740312	0.171	0.096	0.0698416	other
Poglut1	9.87742e-06	0.0739912	0.404	0.28	0.166306	other
Acss3	1.38252e-08	0.0739847	0.047	0.008	0.00023847	other
Ppig	0.00167127	0.0739199	0.807	0.677	1	other
Sdf2l1	8.21009e-07	0.0738609	0.163	0.083	0.0140171	other
Fez2	5.1309e-07	0.0738009	0.204	0.112	0.00876974	other
Grik1	0.000365371	0.0737549	0.276	0.2	1	other
Lypd6b	1.06571e-05	0.0736176	0.104	0.05	0.179317	other
Zfp92	4.76526e-05	0.0733494	0.346	0.242	0.792653	other
Pgbd5	0.000417054	0.0732214	0.207	0.14	1	other
Gck	1.44589e-06	0.0732136	0.308	0.191	0.0246148	other
Chfr	0.000107098	0.0731947	0.33	0.234	1	other
Grik3	4.72752e-06	0.0730665	0.517	0.372	0.0799424	other
Lrrn3	1.04945e-05	0.0730606	0.428	0.3	0.176602	other
Mical3	0.000246808	0.0728622	0.512	0.388	1	other
Kcnj3	0.00118913	0.0726762	0.305	0.228	1	other
Mfng	0.000463715	0.0726523	0.141	0.087	1	other
Cldn1	4.26181e-06	0.0725372	0.106	0.048	0.0721226	other
Bend7	3.5283e-07	0.0724823	0.155	0.076	0.00603586	other
Epb41l4aos	2.3537e-06	0.0724795	0.335	0.216	0.0399777	other
Mageh1	1.69575e-06	0.0724762	0.371	0.243	0.0288429	other
Prkacb	0.000642896	0.0723615	0.976	0.936	1	other
Fgfr1op2	0.00257349	0.0723599	0.559	0.448	1	other
Mpped1	0.000207991	0.0723315	0.201	0.133	1	other
Hmgn1	0.000151241	0.0722772	0.907	0.785	1	other
Thnsl1	2.15062e-06	0.0722533	0.194	0.11	0.0365454	other
Rbfox3	0.000415978	0.0722325	0.714	0.583	1	other
Arhgef28	1.5034e-06	0.0722146	0.158	0.082	0.0255893	other
Dhx40	1.107e-05	0.0720888	0.171	0.098	0.186209	other
Ttc21b	6.88172e-05	0.0720805	0.197	0.126	1	other
Fam78b	3.17985e-06	0.0720721	0.148	0.077	0.053889	other
Bcam	2.92795e-05	0.072007	0.147	0.082	0.489086	other
Ankrd39	3.75793e-06	0.0718771	0.275	0.171	0.0636255	other
Gm10073	0.000230507	0.0718142	0.237	0.165	1	other
AC101921.1	3.50063e-08	0.0718023	0.081	0.026	0.000602808	other
Gosr1	2.38683e-06	0.0716548	0.251	0.153	0.0405355	other
Acaca	6.8339e-05	0.0716342	0.434	0.312	1	other
Dbn1	0.000132576	0.0715948	0.537	0.403	1	other
Elk1	0.000166177	0.0715813	0.223	0.148	1	other
Etf1	4.2627e-06	0.0715761	0.458	0.315	0.0721334	other
Kit	4.52991e-06	0.0714079	0.09	0.038	0.0766234	other
Ttc39c	4.11676e-07	0.0713436	0.122	0.055	0.00704048	other
Rtraf	0.000657036	0.071322	0.815	0.676	1	other
Irgq	0.000850077	0.0712806	0.398	0.303	1	other
Nptxr	0.000201027	0.0712064	0.801	0.661	1	other
Inpp5f	0.000941946	0.0711564	0.791	0.658	1	other
Rnf7	0.00195512	0.0711208	0.712	0.587	1	other
Ndufs4	8.71737e-06	0.0711206	0.441	0.309	0.146905	other
Rasl11b	1.29221e-07	0.0710519	0.126	0.054	0.0022182	other
Polr2g	3.92455e-05	0.0710463	0.564	0.421	0.653909	other
Vat1l	0.0701451	0.0710136	0.749	0.697	1	other
Col11a1	3.59613e-06	0.0709247	0.09	0.038	0.0608897	other
Plcg1	8.03328e-06	0.0708587	0.253	0.161	0.135441	other
Mttp	4.39433e-05	0.070769	0.485	0.36	0.731437	other
Tram1l1	6.49733e-05	0.0706827	0.499	0.368	1	other
Srxn1	3.16483e-08	0.0705461	0.376	0.226	0.000545046	other
Vma21	0.000258284	0.0704836	0.518	0.395	1	other
Gpr27	8.57543e-05	0.0704262	0.397	0.287	1	other
Fam90a1b	3.92448e-13	0.0703553	0.049	0.002	6.83919e-09	other
Nyap2	3.47298e-05	0.0702896	0.24	0.152	0.579431	other
Zc3h15	6.21414e-05	0.0702629	0.701	0.534	1	other
Lsm2	2.70502e-06	0.0702077	0.158	0.083	0.0459042	other
Usp22	0.011595	0.0701188	0.905	0.792	1	other
Bcl11a	0.000815772	0.0700447	0.537	0.424	1	other
Aplp1	0.00236523	0.069943	0.9	0.801	1	other
Cacng5	0.000205271	0.0699167	0.196	0.126	1	other
Ptpn12	3.22334e-06	0.0699115	0.286	0.178	0.0546195	other
Gse1	3.85585e-06	0.0698488	0.555	0.392	0.0652795	other
Retreg1	0.000179765	0.0698313	0.452	0.337	1	other
Gatad2b	5.22779e-05	0.0698306	0.728	0.559	0.86865	other
Slc35e3	2.61743e-05	0.0697767	0.341	0.234	0.43753	other
Dhdh	5.53152e-07	0.0697285	0.147	0.072	0.00945281	other
Rasgrf1	9.8965e-05	0.0697133	0.45	0.328	1	other
Chid1	0.000118904	0.0696545	0.297	0.209	1	other
Tmed10	0.000285042	0.0695924	0.738	0.606	1	other
Scamp3	3.20568e-05	0.0693991	0.201	0.123	0.535124	other
Sh3gl3	7.5138e-05	0.0693764	0.479	0.356	1	other
Zdhhc2	5.28168e-05	0.0693709	0.615	0.459	0.877445	other
Ankrd13c	1.73265e-05	0.0692824	0.393	0.271	0.290531	other
Dpy19l1	8.03283e-05	0.06927	0.264	0.176	1	other
Ppp4r3b	0.000150394	0.0692436	0.299	0.207	1	other
Ssbp4	0.00370263	0.0692326	0.664	0.551	1	other
9530034E10Rik	4.54651e-07	0.0691811	0.06	0.017	0.00777271	other
Tekt1	9.44118e-08	0.0691372	0.126	0.054	0.00162181	other
Cep120	0.000110191	0.0691208	0.306	0.211	1	other
Ccar1	8.68099e-05	0.0691115	0.453	0.329	1	other
Ifnar1	5.12998e-05	0.0690999	0.209	0.133	0.852654	other
Casp3	5.79893e-06	0.0690697	0.185	0.107	0.0979671	other
Scd2	0.00270059	0.0690613	0.861	0.754	1	other
Setd1b	5.44243e-05	0.0688199	0.341	0.239	0.903879	other
Fjx1	2.957e-06	0.0687972	0.112	0.051	0.0501389	other
Zfp329	3.81714e-05	0.0687106	0.512	0.367	0.636202	other
Eif2s1	5.81122e-06	0.0686486	0.186	0.106	0.0981689	other
Cetn4	2.90385e-05	0.0686468	0.251	0.162	0.485146	other
Fam135b	1.43493e-05	0.0685907	0.234	0.147	0.240911	other
Fgd1	7.64783e-08	0.0685762	0.139	0.062	0.00131459	other
Hdac2	0.000215255	0.0685213	0.458	0.348	1	other
Lpin1	0.000201004	0.0683371	0.376	0.273	1	other
Mtus1	0.000166987	0.0682785	0.248	0.168	1	other
Sec61b	0.00617967	0.0682761	0.659	0.541	1	other
Vps35	0.000988944	0.0682027	0.547	0.426	1	other
Gm10036	2.30287e-05	0.068201	0.155	0.088	0.385524	other
Ebf4	0.000106893	0.0681827	0.161	0.098	1	other
Creb1	0.000188675	0.0681485	0.281	0.195	1	other
Zdhhc23	2.22653e-06	0.0681158	0.115	0.054	0.0378287	other
Rab36	5.03704e-06	0.0680919	0.453	0.313	0.0851411	other
Srp9	0.00218426	0.0680471	0.697	0.574	1	other
Atraid	2.50906e-05	0.0680368	0.411	0.29	0.419741	other
Ssbp1	0.000494578	0.0679641	0.284	0.204	1	other
Pxylp1	9.60256e-07	0.0677009	0.229	0.131	0.0163772	other
Nosip	0.000127365	0.0675841	0.174	0.108	1	other
Ptk2b	2.7201e-07	0.0675805	0.103	0.041	0.00465817	other
Rnf149	3.97284e-05	0.0675763	0.393	0.281	0.661756	other
Igdcc4	2.16189e-06	0.0675573	0.3	0.187	0.0367348	other
Hspd1	0.000281178	0.0675361	0.61	0.473	1	other
Dnajc2	3.50528e-06	0.0674316	0.245	0.148	0.0593585	other
Zfand3	6.9491e-05	0.0673195	0.237	0.156	1	other
Ptprr	4.38783e-06	0.0673003	0.18	0.101	0.0742421	other
Gpatch2	7.21517e-06	0.0672922	0.24	0.149	0.12172	other
Por	7.91379e-05	0.0672607	0.392	0.28	1	other
Ftl1-ps1	0.000253551	0.0671892	0.237	0.161	1	other
Ggct	9.79213e-07	0.0671743	0.237	0.137	0.0166995	other
Sfr1	0.000615005	0.0670914	0.536	0.418	1	other
Snrpb2	5.41707e-05	0.066966	0.434	0.315	0.899721	other
Efemp1	1.57943e-08	0.0669554	0.051	0.009	0.000272341	other
Phactr1	4.23177e-05	0.0668875	0.498	0.366	0.704547	other
Pim3	8.2426e-07	0.0668597	0.199	0.11	0.0140718	other
Rbm5	0.00133427	0.0668083	0.75	0.612	1	other
Cd82	7.37634e-09	0.0667947	0.115	0.043	0.000127375	other
Dzip1	6.69984e-05	0.0667167	0.427	0.302	1	other
St8sia3	4.65526e-05	0.0666978	0.641	0.477	0.774542	other
Park2	9.47014e-05	0.0666577	0.213	0.139	1	other
Ostc	2.92968e-05	0.0665462	0.427	0.295	0.489344	other
Tox4	0.000124352	0.0663925	0.376	0.264	1	other
Ptprk	0.00045476	0.0663693	0.482	0.373	1	other
Suz12	5.50034e-05	0.0662047	0.324	0.222	0.913387	other
Hadha	3.49778e-07	0.0660786	0.316	0.189	0.00598401	other
Smc3	1.1424e-05	0.066002	0.428	0.299	0.192094	other
Aifm3	4.63506e-07	0.0659838	0.273	0.161	0.00792363	other
Ndfip2	0.00015525	0.0659474	0.504	0.378	1	other
Hinfp	9.69307e-06	0.065865	0.163	0.091	0.163241	other
Sec22a	7.87069e-05	0.0658118	0.188	0.117	1	other
Cdc42se2	0.000189465	0.0657933	0.566	0.424	1	other
Rtca	9.55316e-05	0.0656083	0.221	0.145	1	other
Anxa5	5.12097e-05	0.0655461	0.169	0.101	0.851207	other
Mesd	0.0076311	0.0655393	0.539	0.441	1	other
Tmed3	0.00163841	0.0654477	0.3	0.228	1	other
Mex3b	2.09788e-07	0.0653729	0.109	0.045	0.00359618	other
Thoc1	0.00029983	0.0653488	0.231	0.158	1	other
Whrn	2.59291e-05	0.0653445	0.115	0.059	0.433482	other
Btbd1	0.000829016	0.0653442	0.461	0.356	1	other
Gfod2	0.00668021	0.06525	0.21	0.152	1	other
Hnrnpa3	0.0086608	0.0652491	0.864	0.756	1	other
Rab30	5.3305e-05	0.0652488	0.19	0.116	0.88545	other
Lrrc3b	6.21924e-06	0.065247	0.212	0.126	0.105018	other
Kdm3a	3.88895e-07	0.0652202	0.152	0.074	0.00665166	other
Myh10	0.000192904	0.0652138	0.613	0.458	1	other
Dgke	0.000138322	0.0651741	0.34	0.241	1	other
N6amt1	4.98974e-05	0.0651397	0.306	0.207	0.829594	other
Krr1	4.79324e-05	0.0650963	0.276	0.183	0.797259	other
Cadm1	2.9642e-05	0.0650932	0.954	0.892	0.494992	other
Med10	5.2458e-05	0.0650071	0.295	0.198	0.871589	other
Gm10037	2.60776e-06	0.0649768	0.122	0.059	0.0442667	other
Rpl10	9.9929e-06	0.0649662	1	0.997	0.16822	other
Slc16a2	1.0993e-05	0.0649266	0.172	0.098	0.184946	other
Pnrc2	1.79952e-05	0.0649192	0.336	0.225	0.30169	other
Tsc22d1	0.00977852	0.0649069	0.863	0.751	1	other
Paics	2.51259e-05	0.0648631	0.351	0.242	0.420306	other
Eif5	0.00377591	0.0648451	0.84	0.722	1	other
Orc2	4.3786e-05	0.0647378	0.186	0.113	0.728862	other
Setd2	1.46653e-05	0.0645566	0.436	0.301	0.246187	other
Arl6	2.40381e-05	0.064526	0.292	0.192	0.402277	other
Gm48682	9.42311e-08	0.0645132	0.062	0.016	0.0016188	other
Fam136a	3.17814e-05	0.0645014	0.357	0.246	0.530559	other
Megf9	9.65695e-05	0.064418	0.321	0.225	1	other
Nrsn2	0.00202182	0.0644103	0.954	0.905	1	other
Sema4c	5.57741e-05	0.064407	0.085	0.041	0.925961	other
Nipa1	1.3905e-05	0.0642855	0.161	0.091	0.233507	other
Lin7b	0.000112347	0.0639923	0.294	0.2	1	other
Top3b	1.03946e-05	0.0639669	0.183	0.105	0.17493	other
H2afv	0.00159019	0.063909	0.433	0.326	1	other
Unc5c	8.89595e-07	0.063859	0.368	0.239	0.0151836	other
Stxbp4	5.01841e-07	0.0638386	0.161	0.082	0.00857797	other
Mkrn1	0.000549553	0.063746	0.449	0.333	1	other
Osbp2	0.00033878	0.0635747	0.22	0.148	1	other
Cacfd1	6.07267e-05	0.0635489	0.415	0.293	1	other
Hebp2	4.18976e-08	0.0635194	0.133	0.057	0.0007211	other
Slc25a3	0.00390941	0.0634349	0.804	0.682	1	other
Wbp1	0.00028328	0.0634153	0.259	0.179	1	other
Sem1	0.010857	0.0634147	0.916	0.839	1	other
Mrps33	0.000797566	0.0632663	0.602	0.463	1	other
D3Ertd751e	3.2632e-05	0.0632183	0.278	0.186	0.544694	other
Scp2	7.40615e-05	0.0631157	0.351	0.249	1	other
Cldn12	2.86412e-05	0.0630551	0.169	0.099	0.478565	other
Snx16	0.000213496	0.0630264	0.428	0.31	1	other
Capns1	0.0420398	0.0629887	0.618	0.528	1	other
Zfp365	0.00094979	0.0629749	0.477	0.371	1	other
Fbxo11	0.000277354	0.062951	0.58	0.448	1	other
Slmap	2.84057e-05	0.0629436	0.275	0.181	0.47466	other
Immt	0.0024082	0.062814	0.371	0.282	1	other
Fam161b	8.01566e-05	0.0627191	0.18	0.111	1	other
Klf10	9.4281e-07	0.0626609	0.093	0.037	0.0160853	other
Polr3k	8.95741e-05	0.0626158	0.368	0.261	1	other
Spata7	1.4087e-05	0.0625578	0.588	0.419	0.23655	other
Rdh14	0.000156196	0.0624849	0.24	0.16	1	other
Fam189a2	1.39491e-06	0.062467	0.128	0.06	0.0237539	other
Ago1	9.59273e-07	0.0624121	0.332	0.204	0.0163614	other
Tmem132c	0.000230541	0.0623854	0.112	0.062	1	other
Vdac2	0.00049422	0.0623691	0.613	0.46	1	other
Tmed8	0.000125069	0.0623364	0.502	0.374	1	other
Clk4	0.000129613	0.0622431	0.336	0.238	1	other
Mtfr1l	2.58117e-05	0.0622308	0.291	0.196	0.431545	other
Neu1	0.000773437	0.0622094	0.264	0.187	1	other
Rplp1	0.000257403	0.0621107	1	0.998	1	other
Sdk2	0.000605712	0.0620606	0.321	0.232	1	other
Agps	2.15265e-05	0.0620297	0.229	0.144	0.360547	other
Klf5	2.43439e-07	0.0620246	0.088	0.032	0.00417011	other
Rab9b	0.00115041	0.061994	0.694	0.551	1	other
Pigp	3.93235e-05	0.0619453	0.232	0.148	0.655169	other
Arpc5l	0.00054811	0.0618551	0.703	0.57	1	other
Tubb2b	3.5052e-05	0.0617844	0.357	0.247	0.584738	other
Efnb3	0.00465791	0.0617327	0.747	0.619	1	other
Nhlrc1	3.57982e-05	0.0615606	0.196	0.119	0.596934	other
Pcnx	0.00013409	0.0614812	0.273	0.187	1	other
Fkbp5	4.69158e-06	0.0614117	0.183	0.103	0.0793393	other
Sall1	2.59095e-08	0.0613826	0.062	0.015	0.000446446	other
Reep1	0.00268673	0.0613709	0.641	0.514	1	other
Eef2	0.00397021	0.0611472	0.929	0.854	1	other
Nsg2	0.000919277	0.0610251	0.984	0.932	1	other
Mettl27	5.55522e-05	0.0609485	0.111	0.058	0.922444	other
Stk32a	2.42584e-07	0.0607793	0.239	0.132	0.00415571	other
Gabrg3	0.00398361	0.0607781	0.562	0.455	1	other
Lims1	2.13005e-05	0.0607147	0.273	0.178	0.356804	other
Tab2	0.000361138	0.0607042	0.371	0.274	1	other
Hook2	0.00125642	0.060689	0.325	0.242	1	other
Fgd3	9.17031e-07	0.0606616	0.062	0.019	0.0156491	other
Ttpal	2.26532e-05	0.0604302	0.224	0.139	0.379259	other
Gm28884	7.41994e-11	0.0603363	0.046	0.004	1.2878e-06	other
Mrpl24	2.32024e-05	0.0603354	0.305	0.201	0.388408	other
Pitpnm3	8.76498e-06	0.0602722	0.226	0.137	0.147699	other
Hpgds	6.21447e-06	0.0601205	0.087	0.037	0.104944	other
Mapk3	2.24028e-05	0.060066	0.507	0.36	0.375112	other
Bnip3	8.5919e-05	0.0600207	0.365	0.254	1	other
Mfsd14a	5.177e-05	0.0599543	0.303	0.203	0.860366	other
Slc30a10	6.52759e-06	0.0599402	0.183	0.104	0.110186	other
Churc1	0.000921285	0.0599343	0.483	0.371	1	other
Sf3a1	0.000245785	0.059927	0.333	0.236	1	other
Mmp16	0.000233594	0.0599167	0.258	0.175	1	other
Abi2	0.00316985	0.0598942	0.725	0.578	1	other
Nipsnap2	0.000121568	0.0598562	0.349	0.244	1	other
Gtf3c2	0.000232787	0.0598067	0.335	0.238	1	other
Stt3b	5.55737e-05	0.0596263	0.286	0.191	0.922747	other
D430042O09Rik	0.000162128	0.0595929	0.278	0.19	1	other
Hspe1	0.00122971	0.0595807	0.893	0.775	1	other
Bcas2	0.00196701	0.0595796	0.599	0.473	1	other
Fam210a	8.21635e-06	0.059574	0.221	0.133	0.138503	other
Mrpl52	0.0040871	0.0595728	0.844	0.728	1	other
Prpsap2	0.000246042	0.0595492	0.232	0.158	1	other
Snx30	0.000189801	0.0595216	0.423	0.303	1	other
Fam214a	5.95626e-05	0.0594783	0.264	0.173	0.988502	other
Nudt10	0.000250696	0.0594123	0.397	0.289	1	other
C330007P06Rik	8.53046e-05	0.0593811	0.212	0.135	1	other
Lrrc3	2.2111e-05	0.0593285	0.111	0.055	0.370293	other
Qrfpr	3.81897e-09	0.0592946	0.039	0.004	6.60071e-05	other
Kctd13	0.000106969	0.0592792	0.37	0.264	1	other
Lsm8	0.000113963	0.0592695	0.199	0.126	1	other
Pafah1b3	6.16664e-05	0.0591425	0.348	0.24	1	other
Prkab2	0.000167657	0.0591234	0.201	0.129	1	other
Exoc4	0.00081464	0.0590992	0.355	0.261	1	other
Ttll5	1.97883e-05	0.059045	0.185	0.108	0.331593	other
Washc5	4.05874e-05	0.0589939	0.18	0.108	0.675861	other
Spint2	0.000223241	0.0589538	0.513	0.383	1	other
Rsph4a	4.43296e-05	0.0589419	0.114	0.059	0.737778	other
Selenot	0.00550221	0.0589079	0.682	0.558	1	other
Prr7	0.000372034	0.0588611	0.302	0.213	1	other
Cacybp	0.000353162	0.0588346	0.528	0.407	1	other
Mbd6	7.77787e-05	0.0587451	0.218	0.14	1	other
Drg2	0.000116177	0.058724	0.175	0.108	1	other
Cdc5l	0.000173153	0.0586986	0.256	0.172	1	other
Naa50	6.69897e-05	0.0586295	0.548	0.404	1	other
R3hcc1l	1.75567e-05	0.0586027	0.115	0.059	0.294373	other
1110059G10Rik	7.08678e-05	0.058593	0.161	0.096	1	other
Cntn2	2.53021e-05	0.0585347	0.382	0.266	0.423152	other
Tmem87b	0.00204481	0.0584957	0.284	0.211	1	other
Gm26699	1.0578e-05	0.058485	0.442	0.307	0.177997	other
Vbp1	0.000630372	0.0584601	0.659	0.53	1	other
Fstl4	9.56434e-07	0.0584496	0.07	0.023	0.0163168	other
Cct4	0.000432139	0.0583687	0.521	0.394	1	other
2010315B03Rik	3.99532e-05	0.0581633	0.207	0.129	0.665421	other
Araf	0.0109795	0.0581185	0.93	0.842	1	other
Senp2	0.000472882	0.058067	0.42	0.319	1	other
C130060K24Rik	7.32576e-06	0.0579796	0.055	0.018	0.123564	other
Usp14	0.000564846	0.0579654	0.558	0.42	1	other
Rrm2b	0.000101826	0.0579618	0.288	0.197	1	other
Gm6133	6.14542e-05	0.0577438	0.118	0.064	1	other
Cops2	0.00122017	0.0577024	0.555	0.431	1	other
Ext1	7.10592e-05	0.0575944	0.161	0.095	1	other
Ralyl	0.000582024	0.0575853	0.507	0.386	1	other
Naa35	0.000246038	0.0574351	0.439	0.324	1	other
Smim1	2.55498e-05	0.0574088	0.294	0.193	0.427193	other
Bhlhe41	6.89357e-05	0.0574002	0.412	0.295	1	other
4930447C04Rik	9.9311e-06	0.0573631	0.205	0.12	0.16719	other
Lig4	6.55144e-05	0.0573595	0.118	0.064	1	other
Mtcl1	2.81182e-06	0.0573208	0.193	0.108	0.0476969	other
Mei4	6.48253e-06	0.0572618	0.068	0.025	0.109432	other
Fkbp14	2.94948e-05	0.0571876	0.122	0.064	0.492563	other
Mien1	0.00424384	0.0571574	0.575	0.463	1	other
Trhr	0.00217679	0.0571411	0.166	0.115	1	other
Foxk1	2.42954e-05	0.057095	0.194	0.116	0.406535	other
Oard1	0.00010692	0.057067	0.147	0.086	1	other
Tmod2	0.0160109	0.0570578	0.84	0.713	1	other
Rbmxl1	0.000134985	0.0570083	0.258	0.173	1	other
Eif3b	4.79743e-05	0.0568019	0.365	0.25	0.797908	other
Snrpe	0.00190584	0.0567361	0.605	0.477	1	other
Ykt6	0.00146927	0.0566294	0.332	0.247	1	other
Grm4	1.60839e-05	0.0566291	0.09	0.041	0.269855	other
4930402H24Rik	0.00152752	0.0565793	0.637	0.507	1	other
Stk32c	0.000413907	0.0565739	0.318	0.229	1	other
Ret	4.96938e-06	0.0564805	0.122	0.059	0.0840024	other
Zfp943	0.000214978	0.0563233	0.123	0.071	1	other
Alkbh2	5.66957e-06	0.056238	0.117	0.056	0.0957931	other
Brdt	0.000701903	0.0562345	0.169	0.11	1	other
Akirin1	0.000351014	0.0562019	0.445	0.33	1	other
Fam69a	3.38802e-06	0.0560825	0.174	0.094	0.0573829	other
1810022K09Rik	2.52359e-05	0.0560659	0.463	0.331	0.422095	other
Cacna1b	0.0132355	0.0560643	0.681	0.55	1	other
Nol9	6.47815e-05	0.0560525	0.117	0.062	1	other
Cntnap2	0.0112637	0.0560503	0.78	0.664	1	other
P2rx4	9.0222e-05	0.0558051	0.174	0.106	1	other
Polr3f	0.000267903	0.0558033	0.223	0.15	1	other
Abcb7	0.000678496	0.0557831	0.16	0.103	1	other
Rit2	0.00154361	0.0557688	0.676	0.546	1	other
Tvp23b	0.000339853	0.0556483	0.286	0.202	1	other
Npepps	0.00525948	0.0556164	0.725	0.617	1	other
Ltbp3	1.29241e-05	0.0556098	0.226	0.139	0.217138	other
Sertad4	1.01721e-05	0.0555976	0.141	0.074	0.171216	other
Lysmd2	2.01025e-05	0.0555876	0.471	0.333	0.336798	other
Hint1	0.00651778	0.0555477	0.942	0.869	1	other
Npbwr1	7.36991e-05	0.0555134	0.081	0.037	1	other
Khdrbs1	0.000695378	0.0554971	0.597	0.466	1	other
Ctnnb1	0.0159728	0.0554679	0.728	0.6	1	other
Rbbp9	0.000174184	0.0553742	0.213	0.14	1	other
Omg	0.00440381	0.0553645	0.327	0.255	1	other
Atp6v1c2	1.1428e-05	0.0553598	0.057	0.02	0.192151	other
Fbxo3	0.00195156	0.0553394	0.66	0.525	1	other
Zfp280b	1.67067e-06	0.0552723	0.209	0.118	0.0284197	other
Rnf145	0.000323731	0.0552443	0.411	0.303	1	other
Fbxo25	5.08326e-05	0.0550978	0.433	0.301	0.84499	other
A730017C20Rik	0.024808	0.0550963	0.825	0.731	1	other
Timm29	0.00272489	0.0550843	0.39	0.301	1	other
Gm45159	1.9339e-05	0.0550831	0.237	0.147	0.324103	other
Mrpl32	0.000288471	0.0550796	0.346	0.246	1	other
Ermp1	0.000487879	0.0550302	0.158	0.101	1	other
Arhgap1	0.0017469	0.055015	0.352	0.264	1	other
Med28	0.00984175	0.054988	0.795	0.672	1	other
Cdh11	1.52673e-05	0.0549598	0.256	0.159	0.256216	other
Zfp446	2.20808e-05	0.0549273	0.152	0.085	0.36981	other
Rps18	0.000329079	0.0548848	0.998	0.998	1	other
Ap3m1	7.58736e-06	0.0547559	0.243	0.151	0.127946	other
Tmem246	0.00147519	0.0546964	0.389	0.293	1	other
Rpf1	2.80396e-06	0.0546746	0.163	0.087	0.0475692	other
Cabin1	2.52344e-05	0.0546729	0.387	0.261	0.422096	other
Cand2	6.47793e-07	0.0546658	0.085	0.032	0.0110663	other
Rpgr	0.000414671	0.0545847	0.215	0.146	1	other
Clock	0.000515093	0.0545842	0.589	0.454	1	other
Cdh8	0.00157179	0.0545137	0.294	0.216	1	other
Gm45716	0.000416675	0.0544128	0.133	0.08	1	other
Opa1	0.000452234	0.0543756	0.441	0.326	1	other
Nefh	4.65023e-05	0.0543235	0.212	0.131	0.773752	other
Ccdc189	2.46843e-05	0.0542474	0.09	0.041	0.413018	other
Fam149b	0.00135852	0.0542197	0.215	0.151	1	other
Fam171a1	0.000334228	0.054213	0.221	0.149	1	other
Actr10	0.00215017	0.0541656	0.523	0.41	1	other
Pmpca	9.51142e-05	0.0541218	0.291	0.198	1	other
Ank3	0.0112858	0.0541158	0.897	0.825	1	other
Arntl2	0.000110954	0.054109	0.115	0.063	1	other
Rpl24	0.000211622	0.0540584	1	0.999	1	other
Riiad1	3.15526e-05	0.0539462	0.327	0.218	0.526833	other
Nono	0.00065891	0.0539424	0.684	0.539	1	other
Rcn1	0.000128885	0.0539369	0.36	0.257	1	other
Cmpk2	0.000175572	0.0539347	0.24	0.158	1	other
Afg3l1	0.000247178	0.0538304	0.359	0.254	1	other
Pmepa1	0.000271662	0.0538015	0.212	0.14	1	other
Eif3l	4.40146e-05	0.0537661	0.224	0.142	0.73258	other
Exoc5	0.00168958	0.0537309	0.483	0.372	1	other
Prkag2	0.000819713	0.0536715	0.275	0.198	1	other
Tekt2	1.83097e-05	0.053615	0.109	0.054	0.306944	other
Ephx4	2.24925e-07	0.0535622	0.054	0.013	0.00385432	other
Sat2	0.000492831	0.0535139	0.177	0.115	1	other
Med13l	5.25242e-05	0.0535027	0.439	0.314	0.872638	other
Twistnb	0.000615747	0.0532977	0.305	0.217	1	other
Gm48715	0.000505049	0.0532968	0.093	0.051	1	other
Serpini1	0.00165108	0.0532068	0.458	0.358	1	other
Oxct1	0.000939793	0.053175	0.526	0.402	1	other
Pld5	1.33547e-05	0.0531532	0.131	0.069	0.224292	other
Vwa5b2	0.00800948	0.0531048	0.299	0.237	1	other
Psmf1	0.000321976	0.0530978	0.18	0.115	1	other
Tcerg1l	0.00323944	0.0530683	0.246	0.183	1	other
Krcc1	2.35031e-05	0.0530497	0.145	0.08	0.393395	other
Dnajc14	0.000233119	0.0529856	0.215	0.142	1	other
Ggh	4.39956e-06	0.0529569	0.104	0.048	0.0744361	other
Map2k7	0.000227655	0.0529137	0.477	0.351	1	other
Sdhaf3	8.11324e-06	0.0528635	0.239	0.146	0.136781	other
Agpat4	0.00120544	0.0528528	0.542	0.406	1	other
Slc12a7	1.53924e-07	0.0528347	0.077	0.025	0.00264104	other
Jkamp	0.000296888	0.0527183	0.479	0.36	1	other
Stx7	0.0128783	0.0526588	0.664	0.547	1	other
Phf6	2.59945e-05	0.0526496	0.306	0.201	0.43455	other
Zfp811	0.00132852	0.052644	0.212	0.147	1	other
Ptbp3	1.32371e-06	0.0526403	0.204	0.113	0.0225481	other
Abca1	6.18443e-05	0.0526089	0.079	0.036	1	other
Gde1	0.00168954	0.0525984	0.491	0.37	1	other
Ssb	0.00202475	0.0525828	0.573	0.463	1	other
Ttc9c	1.97761e-05	0.0525675	0.25	0.158	0.331408	other
Klf16	2.78325e-05	0.0525536	0.161	0.092	0.465137	other
Myrip	0.000171513	0.0525486	0.114	0.063	1	other
Tusc3	0.00306242	0.0525236	0.599	0.466	1	other
Traip	0.000205847	0.0525203	0.125	0.072	1	other
0610010F05Rik	0.000130422	0.0524979	0.318	0.222	1	other
Rasgef1a	0.0249646	0.0524927	0.752	0.641	1	other
Mindy2	9.81465e-05	0.0524853	0.45	0.323	1	other
Map2k4	0.0118862	0.0523962	0.728	0.623	1	other
Akr1e1	3.97121e-05	0.05236	0.118	0.062	0.661525	other
Tmem114	2.90238e-07	0.0523265	0.077	0.026	0.00496888	other
Cotl1	0.000859113	0.0523227	0.43	0.323	1	other
Erlin2	4.5117e-05	0.0522844	0.362	0.247	0.750747	other
Hapln4	0.000521606	0.0522447	0.276	0.195	1	other
Actr3	0.0161052	0.0522431	0.66	0.545	1	other
Net1	9.34333e-06	0.0521289	0.07	0.027	0.157388	other
Rif1	6.41495e-05	0.0521188	0.305	0.205	1	other
Mfn1	0.000482413	0.0520835	0.273	0.191	1	other
Snx5	0.00525849	0.0520696	0.305	0.235	1	other
Rps14	0.00233016	0.0520514	1	1	1	other
Commd10	7.19918e-05	0.0520314	0.134	0.076	1	other
Rnf138rt1	3.40273e-06	0.0519823	0.112	0.051	0.0576286	other
Pdss2	0.000131595	0.0519597	0.139	0.08	1	other
Csgalnact1	2.4604e-07	0.0519137	0.063	0.018	0.00421418	other
Insr	0.000636299	0.051833	0.242	0.166	1	other
Nob1	0.00029943	0.0518137	0.231	0.157	1	other
2810402E24Rik	0.00010438	0.0517721	0.09	0.044	1	other
Med21	0.000313896	0.0517215	0.329	0.236	1	other
Kcnmb4os2	2.63363e-05	0.0517183	0.07	0.028	0.440159	other
Rybp	0.000836729	0.0516744	0.472	0.359	1	other
Nek9	9.042e-05	0.0516521	0.164	0.098	1	other
Rhou	1.84504e-05	0.0516267	0.207	0.124	0.309284	other
Gas2	0.000142447	0.0515954	0.088	0.044	1	other
Seh1l	0.000150538	0.051538	0.265	0.179	1	other
Gna13	0.000293088	0.0515294	0.254	0.174	1	other
Lman2l	0.00044772	0.0514953	0.534	0.402	1	other
Larp4b	0.00638825	0.05149	0.692	0.572	1	other
Zrsr1	0.000718472	0.051423	0.431	0.331	1	other
Amd1	0.000155216	0.0512097	0.18	0.112	1	other
Rps23	1.10297e-05	0.0512092	1	0.998	0.185541	other
Gdap1	0.0133352	0.0511586	0.695	0.576	1	other
Scaf8	0.000885955	0.0511536	0.207	0.142	1	other
Rps12-ps3	3.71122e-05	0.0511164	0.107	0.055	0.618698	other
Scg5	0.0168762	0.0510785	0.6	0.5	1	other
Banp	0.000839452	0.0509921	0.253	0.179	1	other
Arcn1	0.00209399	0.0509821	0.502	0.39	1	other
Taf13	0.000709982	0.0509573	0.167	0.108	1	other
Cep164	0.000483036	0.0509511	0.349	0.253	1	other
Rfx3	7.40665e-05	0.0509504	0.306	0.204	1	other
Rpl27a	0.00157768	0.0509232	1	0.999	1	other
Idi1	0.00768405	0.0508897	0.221	0.167	1	other
Ak6	9.91198e-06	0.0508515	0.237	0.144	0.166878	other
Wee1	0.000299001	0.0508261	0.131	0.077	1	other
Ppp1r1a	0.000475258	0.0507846	0.577	0.439	1	other
Ddhd1	0.00038274	0.0507666	0.397	0.288	1	other
Nabp1	2.03137e-06	0.0507522	0.096	0.041	0.0345231	other
Iqcb1	0.000702973	0.0507463	0.316	0.228	1	other
Mthfsl	0.000751196	0.050736	0.232	0.161	1	other
Gpr137c	5.9202e-05	0.0506407	0.283	0.188	0.982575	other
Pcmtd1	0.000770694	0.0506287	0.499	0.381	1	other
Mfn2	0.00540405	0.05062	0.477	0.387	1	other
Tef	0.0300409	0.0506157	0.61	0.506	1	other
Cnot11	0.00106895	0.0505723	0.155	0.101	1	other
Rsf1	0.00840076	0.0505713	0.573	0.466	1	other
Mospd2	7.32045e-06	0.0505174	0.128	0.064	0.123481	other
Cdk4	0.000220976	0.0504979	0.303	0.208	1	other
Flvcr1	0.000920345	0.0504718	0.172	0.113	1	other
Mkl1	0.00131865	0.050455	0.13	0.082	1	other
Dnajc15	0.000282071	0.0504219	0.362	0.259	1	other
Isoc1	7.96916e-05	0.0503839	0.085	0.041	1	other
Cpsf2	0.000143799	0.0503388	0.295	0.202	1	other
Timm8a1	5.56664e-05	0.0503097	0.109	0.056	0.924229	other
Ghr	0.000610782	0.0503063	0.103	0.059	1	other
Micu3	0.0918356	0.0502956	0.773	0.688	1	other
4930453N24Rik	0.000206544	0.0502284	0.175	0.109	1	other
Htr1f	1.25358e-08	0.0501455	0.046	0.007	0.000216268	other
Foxo1	3.54362e-05	0.0501343	0.136	0.073	0.591005	other
Tpd52	0.00603763	0.0500779	0.385	0.305	1	other
Lgalsl	0.000154788	0.0500134	0.295	0.204	1	other
Zcchc2	5.18782e-05	0.0499907	0.117	0.062	0.862111	other
Insm2	1.34254e-07	0.0499803	0.142	0.065	0.00230447	other
Vamp7	0.00108963	0.0499546	0.31	0.221	1	other
2610044O15Rik8	0.0003239	0.0499282	0.163	0.102	1	other
Nkap	0.000422695	0.0498264	0.188	0.123	1	other
Klf11	5.81723e-06	0.0497509	0.077	0.03	0.0982646	other
Kcnj6	0.000576804	0.0497487	0.087	0.047	1	other
Snhg12	0.00104074	0.0497422	0.708	0.572	1	other
Eif2ak3	0.00022336	0.049655	0.088	0.045	1	other
Pigs	0.000673223	0.0496496	0.297	0.209	1	other
Eny2	0.00130332	0.0496257	0.539	0.422	1	other
Nucb2	0.000188127	0.0495754	0.248	0.168	1	other
Cbln4	0.000599166	0.0495598	0.196	0.129	1	other
Rb1	4.84786e-05	0.0494831	0.136	0.075	0.806248	other
Oxtr	9.76314e-08	0.0494563	0.036	0.005	0.00167692	other
Chrna1os	8.70633e-06	0.0493474	0.076	0.03	0.146728	other
Pmpcb	0.000275738	0.0493322	0.216	0.144	1	other
Cnksr2	1.65091e-06	0.0493301	0.202	0.112	0.0280886	other
Tmem107	0.0014911	0.0493221	0.242	0.172	1	other
Flywch2	0.000275032	0.0492225	0.289	0.203	1	other
Dock11	0.004965	0.0491985	0.133	0.09	1	other
Chuk	0.00053111	0.0491742	0.381	0.275	1	other
Fam102b	2.21592e-05	0.0491219	0.207	0.124	0.371079	other
Mad2l1	2.98115e-06	0.0491176	0.062	0.02	0.0505455	other
Ctsl	0.00378537	0.0491001	0.226	0.165	1	other
Nell2	0.0011502	0.0490814	0.46	0.353	1	other
Chac2	2.5308e-05	0.0489859	0.134	0.073	0.423226	other
Nrxn3	0.00700892	0.0489798	0.991	0.978	1	other
Pcf11	0.00162716	0.048951	0.283	0.209	1	other
Necab3	0.000386921	0.0488879	0.114	0.065	1	other
4933406B17Rik	2.41098e-07	0.0488798	0.046	0.009	0.0041305	other
Zranb1	0.000160335	0.0488563	0.529	0.393	1	other
Top2b	0.000138178	0.0488346	0.45	0.323	1	other
Gm32014	0.000220756	0.0488088	0.071	0.034	1	other
Prkra	0.00154511	0.0488088	0.24	0.174	1	other
BC022687	7.28192e-05	0.048799	0.122	0.066	1	other
Pdia6	0.0009972	0.0487204	0.439	0.334	1	other
B230354K17Rik	0.000629098	0.0486161	0.156	0.1	1	other
Zfp442	8.56116e-05	0.0486076	0.12	0.066	1	other
Zfp277	0.00121932	0.0486037	0.107	0.064	1	other
Moxd1	6.82045e-08	0.0485399	0.041	0.006	0.00117284	other
Klhl13	9.65639e-05	0.0485293	0.308	0.208	1	other
Ern2	2.30496e-06	0.0484505	0.068	0.023	0.0391544	other
Plxna3	5.84875e-05	0.0484231	0.209	0.129	0.970834	other
Fhod3	0.000790351	0.0484134	0.106	0.062	1	other
Tmem9	0.000680182	0.0483248	0.45	0.344	1	other
Gm20342	0.00101253	0.0482927	0.21	0.144	1	other
Tmed7	0.000169917	0.0482734	0.594	0.447	1	other
Tmem164	0.000135166	0.0482307	0.111	0.059	1	other
Rhoq	6.88513e-05	0.0482141	0.136	0.076	1	other
Nipsnap3b	7.93204e-05	0.0481862	0.147	0.084	1	other
Bub3	0.024036	0.0481647	0.692	0.569	1	other
Ddx28	1.44106e-05	0.0481578	0.076	0.031	0.241924	other
Tmc4	3.54925e-05	0.0481096	0.183	0.109	0.591908	other
Atf5	0.00556571	0.0480975	0.134	0.091	1	other
Nceh1	0.000905508	0.0479418	0.379	0.284	1	other
Tvp23a	0.000300772	0.0479077	0.288	0.196	1	other
Nphp1	3.84254e-05	0.0479015	0.196	0.119	0.640397	other
Vti1a	0.000991349	0.04776	0.209	0.143	1	other
Mturn	0.000249469	0.0477192	0.314	0.219	1	other
Srsf10	0.000593539	0.0476936	0.63	0.488	1	other
Txn2	0.00116408	0.0476488	0.479	0.365	1	other
Cited4	3.19557e-06	0.0476228	0.062	0.02	0.0541522	other
Ncor1	0.0348048	0.0475909	0.728	0.604	1	other
Smoc1	3.66951e-05	0.0475814	0.111	0.056	0.61178	other
Zfp945	0.00911574	0.0475154	0.112	0.076	1	other
Manba	0.000181085	0.047499	0.103	0.055	1	other
Atad5	3.52603e-05	0.0474558	0.074	0.032	0.588107	other
Ptprg	6.66609e-05	0.0474353	0.466	0.334	1	other
Fam19a1	0.000845073	0.0474318	0.169	0.109	1	other
Tbcel	0.000756227	0.0473961	0.313	0.227	1	other
Pcyox1	0.00297394	0.0473909	0.524	0.412	1	other
Mpv17l	0.000751178	0.0473846	0.359	0.262	1	other
Plgrkt	0.00040759	0.0473382	0.191	0.125	1	other
Susd2	0.00584402	0.0473257	0.166	0.118	1	other
Cgref1	0.000175049	0.0473102	0.231	0.15	1	other
Gm45051	0.000105372	0.0472116	0.131	0.074	1	other
Tunar	0.00649478	0.0472108	0.239	0.18	1	other
Snx25	0.00132624	0.0472016	0.182	0.122	1	other
Gm42722	0.00030243	0.0471087	0.103	0.056	1	other
Mblac2	0.00067562	0.0470984	0.494	0.373	1	other
Pik3ca	0.000360689	0.0470826	0.55	0.412	1	other
Zfp65	1.59786e-06	0.0470465	0.082	0.031	0.0271908	other
Dennd5b	0.00640688	0.0469747	0.638	0.52	1	other
Atf6b	0.000121088	0.0469692	0.174	0.105	1	other
Hsp90ab1	0.0062154	0.0469529	0.997	0.959	1	other
Nit1	0.00074364	0.0469506	0.278	0.196	1	other
D430036J16Rik	6.7584e-05	0.0469478	0.079	0.036	1	other
Lsm1	0.00210452	0.0469464	0.332	0.249	1	other
Kctd5	0.00010968	0.0469178	0.118	0.065	1	other
Atf4	0.00791244	0.0469167	0.556	0.445	1	other
Zfp827	0.000659523	0.0468792	0.186	0.121	1	other
Akap7	0.00355568	0.046867	0.376	0.291	1	other
Pi16	1.26042e-05	0.0467313	0.134	0.069	0.211788	other
Derl1	0.00772274	0.0466772	0.506	0.399	1	other
Grik4	8.70748e-05	0.0466468	0.185	0.112	1	other
BC005561	0.000430833	0.0465692	0.501	0.373	1	other
Hsp90aa1	0.0311726	0.0465449	0.967	0.909	1	other
Plec	0.000441051	0.0465195	0.237	0.161	1	other
Tmem86a	2.53715e-05	0.0464927	0.1	0.048	0.424236	other
Zfp72	8.82192e-05	0.046467	0.095	0.048	1	other
Nudcd2	0.00111184	0.0464617	0.27	0.193	1	other
Chchd3	0.000393905	0.0464428	0.205	0.137	1	other
Spcs3	0.00155473	0.0464374	0.246	0.173	1	other
Abcc1	0.00126189	0.0464368	0.103	0.061	1	other
Sephs2	3.78655e-05	0.0464299	0.34	0.229	0.631181	other
Gucy1b1	0.00266101	0.0463613	0.365	0.275	1	other
Rprml	0.000793104	0.0462602	0.09	0.05	1	other
Smim18	0.000322018	0.0462336	0.128	0.076	1	other
Gprin2	0.00388603	0.0462289	0.123	0.081	1	other
Galnt7	6.03864e-05	0.046148	0.133	0.073	1	other
Atp6v1h	0.00218665	0.0461143	0.461	0.353	1	other
Fgd4	0.000788397	0.046042	0.36	0.264	1	other
Tmem170b	0.00298483	0.0459913	0.303	0.226	1	other
Gigyf2	0.00284515	0.0459739	0.521	0.41	1	other
Gab2	5.67607e-06	0.0458818	0.191	0.108	0.0958972	other
Sf3a3	0.00145699	0.0458681	0.16	0.105	1	other
Disp3	0.00187141	0.0458476	0.156	0.104	1	other
Unkl	0.00319642	0.0458279	0.319	0.242	1	other
Rpl13	0.000156186	0.0458018	1	1	1	other
Bag3	9.84763e-06	0.0457598	0.082	0.034	0.165814	other
Dars	0.00243984	0.0457535	0.275	0.204	1	other
Btf3	0.0637553	0.0457523	0.833	0.734	1	other
Srsf11	0.0197708	0.0457127	0.749	0.64	1	other
Rpl11	0.0060512	0.0456256	1	0.999	1	other
Caprin1	0.0326792	0.0456144	0.78	0.655	1	other
Tspan3	0.00480544	0.0456091	0.7	0.569	1	other
Rbm28	0.000315759	0.0456026	0.292	0.201	1	other
Mef2a	0.000250584	0.0455457	0.431	0.311	1	other
Nav1	0.00438728	0.0455447	0.774	0.644	1	other
Faxc	4.00494e-05	0.0454939	0.07	0.029	0.666982	other
Atp5g2	0.0123334	0.0454086	0.749	0.633	1	other
Cdh24	0.000954249	0.0453585	0.107	0.063	1	other
Hddc2	0.00135905	0.0453337	0.262	0.188	1	other
Rsl1d1	0.00782568	0.0453103	0.338	0.262	1	other
H2afx	0.00010751	0.0452951	0.24	0.156	1	other
Marcksl1	0.0170297	0.0452601	0.904	0.799	1	other
Cfl1	0.0304655	0.0452295	0.956	0.878	1	other
Grb2	0.029336	0.0451852	0.694	0.565	1	other
Sobp	0.00546346	0.0451619	0.578	0.462	1	other
Slc7a6	0.00205814	0.0451103	0.103	0.062	1	other
Jakmip1	8.84151e-05	0.0450923	0.553	0.404	1	other
Timm9	0.00560853	0.0450558	0.649	0.53	1	other
AC118542.1	0.000373517	0.0450157	0.18	0.115	1	other
Wdr7	0.0165259	0.0449194	0.521	0.427	1	other
Zfp788	0.000589994	0.0449175	0.243	0.169	1	other
Map1b	0.028507	0.0448714	0.992	0.963	1	other
Grsf1	0.00184752	0.0448676	0.427	0.328	1	other
Isyna1	3.32889e-05	0.0448666	0.231	0.144	0.555491	other
Lancl2	0.00671384	0.0448212	0.313	0.242	1	other
1700037H04Rik	0.000109155	0.0448033	0.543	0.405	1	other
Tmed2	0.00273289	0.044795	0.665	0.529	1	other
Slc25a14	0.0118092	0.04479	0.278	0.213	1	other
Nol8	0.00146426	0.0447892	0.191	0.133	1	other
Eloa	0.00462488	0.0447847	0.115	0.075	1	other
Arl6ip6	0.000199801	0.0447578	0.204	0.129	1	other
Uhrf1bp1l	0.00226666	0.0447412	0.349	0.264	1	other
Rps11	0.00104583	0.0447395	0.998	0.999	1	other
Numa1	0.000101756	0.0447188	0.427	0.303	1	other
Mrpl9	0.00108311	0.0446714	0.239	0.167	1	other
Eaf1	0.000468188	0.044667	0.142	0.087	1	other
Nol4l	3.88835e-05	0.0446225	0.264	0.175	0.647993	other
Fbn2	4.03144e-08	0.04454	0.047	0.009	0.000693972	other
Scoc	0.0222653	0.0445153	0.87	0.767	1	other
Mllt10	0.000862963	0.0444701	0.398	0.294	1	other
Fam206a	0.0036297	0.0444622	0.128	0.084	1	other
Trps1	0.000658011	0.0444475	0.223	0.151	1	other
Ints6	0.00061982	0.0444273	0.4	0.295	1	other
Relt	0.000123921	0.0444211	0.174	0.105	1	other
Slc1a1	0.0013827	0.0444108	0.299	0.222	1	other
Lnpk	0.00173542	0.0444028	0.515	0.392	1	other
Hibch	0.000832849	0.044379	0.145	0.092	1	other
1110051M20Rik	0.00404809	0.0443702	0.336	0.261	1	other
Yif1b	6.01766e-05	0.0443425	0.114	0.06	0.998511	other
Ppp2r3d	8.20194e-05	0.0443373	0.22	0.14	1	other
D930020B18Rik	0.000746882	0.0442563	0.055	0.025	1	other
Lrrc55	0.0054515	0.0442058	0.148	0.104	1	other
Unc5a	8.3861e-05	0.0441829	0.322	0.223	1	other
Fam199x	0.000908369	0.0441043	0.3	0.217	1	other
Cycs	0.0034177	0.0440403	0.64	0.502	1	other
Trmt11	0.000498698	0.0440242	0.145	0.09	1	other
Ssr4	0.00354594	0.0439871	0.626	0.491	1	other
Slc35b1	0.000232401	0.0439103	0.253	0.168	1	other
Mrap2	0.135686	0.0439049	0.3	0.261	1	other
Sf3b6	9.80191e-05	0.0438883	0.335	0.233	1	other
Dusp26	0.0399309	0.0438438	0.725	0.613	1	other
Ccz1	0.00160327	0.0438414	0.227	0.161	1	other
Psma6	4.08658e-05	0.0438199	0.258	0.165	0.680415	other
Phf20l1	0.00433564	0.0438152	0.566	0.459	1	other
Aqp5	3.34096e-09	0.0438105	0.03	0.001	5.77552e-05	other
Ncl	0.00237452	0.0437976	0.79	0.653	1	other
Qser1	0.000179399	0.0437426	0.107	0.058	1	other
S100a9	0.215392	0.0437339	0.003	0.001	1	other
Epm2a	0.00106442	0.0437267	0.237	0.167	1	other
Gdpd1	0.000780203	0.043702	0.379	0.278	1	other
Cckar	1.42337e-06	0.0436861	0.049	0.012	0.0242358	other
Socs4	0.00174761	0.0436565	0.131	0.083	1	other
Mcts1	0.000940675	0.0436384	0.294	0.211	1	other
Psmb5	0.000948776	0.04363	0.338	0.247	1	other
Klhl12	0.000138944	0.0436103	0.276	0.185	1	other
Zbtb7c	7.55915e-06	0.0436037	0.194	0.111	0.127477	other
Arid2	0.000121172	0.0435891	0.333	0.229	1	other
Lsm11	0.000110475	0.043586	0.147	0.086	1	other
Maoa	0.00126554	0.0434932	0.39	0.293	1	other
Fam124a	7.38405e-05	0.0434766	0.134	0.075	1	other
Mmaa	0.000167988	0.0434549	0.172	0.106	1	other
Rhobtb2	0.00399788	0.0433859	0.297	0.227	1	other
Tspyl4	0.0354496	0.0432424	0.904	0.828	1	other
Tmtc2	0.00157441	0.0432389	0.112	0.069	1	other
Gm15446	0.00245885	0.0431943	0.107	0.066	1	other
Ahcyl1	0.00699988	0.0431923	0.479	0.381	1	other
Poc1b	3.95286e-05	0.0431877	0.07	0.029	0.658507	other
Stmn4	0.0100201	0.0431851	0.513	0.418	1	other
Pgls	0.000315506	0.0431222	0.275	0.189	1	other
Rab37	2.33528e-09	0.0431141	0.033	0.002	4.04004e-05	other
Manf	0.00351399	0.0430964	0.397	0.304	1	other
Carf	0.00966776	0.0430812	0.292	0.227	1	other
Esf1	0.00370038	0.0430507	0.294	0.222	1	other
BC030500	0.000135297	0.0430344	0.305	0.209	1	other
Rdh12	3.2863e-05	0.0429865	0.052	0.018	0.548483	other
Plcl1	0.000526555	0.0429802	0.142	0.087	1	other
Zadh2	0.00167356	0.0429648	0.112	0.069	1	other
Lasp1	0.000897366	0.0429286	0.403	0.296	1	other
Clasp1	0.00735972	0.0429105	0.518	0.428	1	other
Jade3	2.8058e-06	0.0428946	0.101	0.044	0.0475976	other
Rasa4	0.000153872	0.0428822	0.106	0.056	1	other
Herc3	0.00307888	0.0428577	0.725	0.602	1	other
Gm973	2.91419e-05	0.0428313	0.057	0.02	0.486845	other
Erich3	0.00187378	0.0426979	0.278	0.203	1	other
Zfp706	0.045783	0.0426914	0.777	0.673	1	other
Gm37494	0.000495918	0.0426854	0.134	0.081	1	other
Creld1	8.36392e-05	0.0426521	0.365	0.255	1	other
Ankrd13a	0.000179238	0.0425842	0.175	0.108	1	other
Rin2	1.2313e-05	0.0425622	0.074	0.03	0.20692	other
Pcsk2os1	0.000644756	0.042555	0.133	0.08	1	other
Tmem126a	0.00146954	0.0425258	0.299	0.218	1	other
Stk3	0.000845532	0.0425153	0.167	0.11	1	other
Ppdpf	0.00579332	0.0425029	0.615	0.488	1	other
Dkkl1	4.17597e-06	0.0424138	0.071	0.026	0.0706825	other
Ptms	0.0390842	0.0423748	0.904	0.788	1	other
C1galt1c1	0.000148938	0.0423673	0.183	0.114	1	other
Cdk7	0.000819765	0.0423186	0.155	0.1	1	other
Foxr2	7.2812e-05	0.0423034	0.055	0.021	1	other
Rnf150	0.000199294	0.0422671	0.239	0.157	1	other
Idh2	0.00204276	0.0422582	0.183	0.125	1	other
Msrb2	8.92427e-05	0.042245	0.139	0.079	1	other
Fam214b	0.000932373	0.0422242	0.248	0.175	1	other
Pyurf	0.000134238	0.0422171	0.161	0.097	1	other
Ppib	0.0285976	0.042119	0.235	0.186	1	other
Fnta	0.00921697	0.0421112	0.36	0.286	1	other
Rab9	0.00196315	0.0420216	0.234	0.165	1	other
Paqr8	0.000744619	0.0419998	0.122	0.073	1	other
Ankfy1	5.96528e-05	0.0419943	0.289	0.19	0.989938	other
Sstr1	1.26188e-05	0.0419732	0.047	0.014	0.212022	other
Pno1	0.000420294	0.0419137	0.109	0.062	1	other
B4galt6	0.0625499	0.0418983	0.913	0.85	1	other
Rbm7	7.15965e-05	0.0418743	0.294	0.197	1	other
Exosc9	0.00133883	0.0417964	0.134	0.085	1	other
Adgb	3.34741e-07	0.0417816	0.036	0.005	0.00572775	other
Tmeff2	4.48443e-05	0.0417792	0.441	0.307	0.746254	other
Med22	3.91931e-05	0.0417699	0.166	0.095	0.653075	other
Nsmce4a	0.00167264	0.04172	0.161	0.107	1	other
Lrif1	0.00243669	0.0416758	0.381	0.293	1	other
Mylip	0.00186537	0.0416489	0.096	0.057	1	other
Matr3	0.0629073	0.0416335	0.938	0.856	1	other
Cfl2	0.00731054	0.0416149	0.741	0.625	1	other
Scfd1	0.00145977	0.0416097	0.302	0.222	1	other
Tmem266	0.000860277	0.0415994	0.07	0.035	1	other
Irf2bpl	0.0190012	0.0415978	0.457	0.371	1	other
Ppp5c	0.00153608	0.0415899	0.348	0.26	1	other
Lysmd1	0.000518795	0.0415603	0.141	0.087	1	other
Rbms1	0.000584301	0.0415412	0.118	0.069	1	other
Fam83a	0.0754669	0.0413502	0.008	0.002	1	other
Rnf112	0.00452969	0.0413387	0.603	0.474	1	other
Arl16	0.0060178	0.0413074	0.357	0.275	1	other
H1f0	0.000146148	0.0412804	0.33	0.23	1	other
Hsd17b10	0.000475778	0.0412611	0.245	0.167	1	other
Csgalnact2	0.000133193	0.0412611	0.111	0.059	1	other
Mcrip1	0.00358018	0.0412071	0.635	0.501	1	other
Tmem245	0.00085438	0.0411961	0.518	0.395	1	other
Snd1	0.000557729	0.0411948	0.254	0.178	1	other
Banf1	0.00337387	0.0411382	0.346	0.261	1	other
Rps6ka5	0.00109554	0.0411374	0.163	0.107	1	other
Jarid2	0.000324977	0.0411295	0.352	0.254	1	other
Stk38l	7.4682e-05	0.041124	0.109	0.057	1	other
Tsen15	0.000214308	0.0411209	0.177	0.111	1	other
Dcun1d5	0.00122368	0.0411097	0.499	0.381	1	other
Dpysl3	0.00449762	0.0410853	0.381	0.296	1	other
Fbxw5	0.0031599	0.0410425	0.308	0.229	1	other
Rnf139	0.00196123	0.0409439	0.144	0.094	1	other
Rsph1	0.000423853	0.0408862	0.085	0.044	1	other
Mrpl54	0.000628257	0.0408749	0.463	0.339	1	other
Adgrb3	0.0324571	0.0408679	0.629	0.53	1	other
E130307A14Rik	0.000102611	0.0408646	0.311	0.211	1	other
Lpcat1	0.000286918	0.0408582	0.367	0.264	1	other
Xpo6	0.00357293	0.0408419	0.351	0.269	1	other
Cidea	6.38812e-07	0.040816	0.047	0.011	0.0109147	other
Pcp4l1	0.000740002	0.0408053	0.118	0.071	1	other
Usp27x	0.000609335	0.0407872	0.338	0.245	1	other
Fam117a	3.03655e-06	0.0407829	0.051	0.014	0.0514726	other
Ccdc88a	0.0196495	0.04077	0.592	0.484	1	other
Rapgef5	0.000697115	0.0407562	0.134	0.082	1	other
Mthfd2	7.49111e-05	0.0407526	0.145	0.083	1	other
Ythdc2	0.000414896	0.0407356	0.267	0.185	1	other
Gm3448	1.22416e-05	0.0407067	0.118	0.059	0.205732	other
Dnal1	0.00100814	0.0407042	0.414	0.31	1	other
Armcx5	0.000573414	0.0406952	0.209	0.14	1	other
Zfp729b	0.00108554	0.0406678	0.063	0.031	1	other
Ankrd27	0.00666598	0.0406511	0.118	0.079	1	other
Frmd5	0.00025611	0.0406496	0.142	0.083	1	other
Zfp90	0.000799246	0.04063	0.152	0.096	1	other
9030624J02Rik	0.00196538	0.0406273	0.242	0.172	1	other
Pnmal2	0.0149788	0.0405104	0.975	0.953	1	other
Stxbp5l	0.00016607	0.0404966	0.34	0.237	1	other
Acbd7	2.22368e-05	0.0404597	0.049	0.016	0.372356	other
Lman2	0.00259006	0.0404407	0.374	0.286	1	other
Tomm20	0.0277074	0.0403988	0.923	0.835	1	other
Ptk2	0.00158096	0.0403919	0.251	0.178	1	other
Nup62cl	1.07824e-06	0.0403416	0.028	0.003	0.0183797	other
Dhx32	0.000303221	0.0403293	0.183	0.116	1	other
Dpy19l4	0.000144778	0.0403228	0.344	0.24	1	other
Cnep1r1	0.000831499	0.0403188	0.291	0.205	1	other
Nemf	0.00250941	0.0403081	0.352	0.264	1	other
Dmrtc1a	0.000558904	0.0403049	0.145	0.09	1	other
Rps19bp1	0.00310346	0.0403005	0.229	0.164	1	other
Foxk2	0.00483838	0.0402957	0.294	0.222	1	other
Mterf2	0.00888377	0.0402771	0.098	0.064	1	other
Zranb2	0.0473219	0.0402329	0.828	0.715	1	other
Ccnd3	0.000980528	0.0402244	0.095	0.053	1	other
Gm26894	2.10072e-05	0.0402002	0.06	0.022	0.351934	other
Dgkz	0.00205293	0.0401887	0.261	0.188	1	other
Rraga	0.00600861	0.0401108	0.531	0.421	1	other
1700016K19Rik	1.13572e-05	0.0400858	0.076	0.03	0.191005	other
Sybu	0.00229853	0.0400236	0.548	0.43	1	other
Gmps	0.0104097	0.0399433	0.708	0.577	1	other
Ppp2ca	0.0135887	0.0399317	0.812	0.677	1	other
Adk	0.00546395	0.039926	0.145	0.099	1	other
Krtcap3	0.000298199	0.0399219	0.087	0.044	1	other
Tubgcp4	0.000213469	0.039886	0.183	0.115	1	other
Spata6	0.000564754	0.0398824	0.054	0.023	1	other
Kat2a	0.00111537	0.039879	0.245	0.171	1	other
Serf1	0.00538141	0.0398537	0.468	0.374	1	other
Adamts19	7.82901e-08	0.0398443	0.025	0.001	0.00134557	other
1700001L19Rik	0.00200687	0.0398184	0.201	0.139	1	other
Sema3c	0.00254787	0.0397736	0.063	0.033	1	other
Myg1	0.000748339	0.03974	0.207	0.14	1	other
Mir9-3hg	0.00165702	0.0397194	0.073	0.039	1	other
Rnf170	0.00530937	0.0397131	0.354	0.272	1	other
Polr2b	0.00123051	0.039693	0.174	0.115	1	other
Actr3b	0.00165979	0.0396622	0.295	0.22	1	other
Tmem131	0.00123156	0.0396316	0.297	0.218	1	other
Bpifb1	3.24395e-06	0.0396004	0.041	0.009	0.0549655	other
Mgea5	0.00144326	0.0395947	0.621	0.475	1	other
Cdkl4	0.00304428	0.0395778	0.095	0.057	1	other
Pank4	0.000553892	0.0395262	0.147	0.09	1	other
Sgce	0.000975394	0.0395222	0.231	0.158	1	other
Asic2	0.00052769	0.0394984	0.406	0.296	1	other
Enc1	0.00726933	0.0394935	0.645	0.512	1	other
Lap3	0.000244985	0.0394832	0.115	0.064	1	other
Cnbp	0.0038891	0.0394754	0.694	0.569	1	other
Cul2	0.00501174	0.0394667	0.256	0.191	1	other
Rbm11	0.0207101	0.0394538	0.098	0.068	1	other
Vps9d1	0.000166689	0.0394147	0.306	0.213	1	other
Angptl6	0.000368856	0.0393696	0.166	0.104	1	other
Prpf38a	0.00101885	0.0393537	0.172	0.113	1	other
Nsmce3	0.00675202	0.0393296	0.311	0.239	1	other
C2cd5	0.0179764	0.0392978	0.482	0.392	1	other
Ralgds	0.00186852	0.039296	0.313	0.23	1	other
Cep126	0.000175926	0.0392758	0.218	0.14	1	other
Cdc14a	0.000249748	0.039175	0.087	0.044	1	other
Rpusd3	9.0183e-05	0.0391709	0.076	0.034	1	other
Pfdn5	0.0125687	0.0391664	0.998	0.988	1	other
1810044D09Rik	0.000118206	0.0391192	0.049	0.018	1	other
Mid1ip1	0.000758402	0.0390924	0.39	0.286	1	other
Bpnt1	0.000202751	0.0390912	0.483	0.351	1	other
Zfp449	0.000312878	0.0390865	0.09	0.047	1	other
Xkr4	0.000619379	0.0390784	0.062	0.029	1	other
Tbc1d30	0.000127491	0.0390758	0.264	0.174	1	other
Ptpn2	0.00094409	0.0390643	0.1	0.057	1	other
Tug1	0.00305762	0.0390573	0.608	0.482	1	other
Stx6	5.90827e-05	0.0390225	0.289	0.192	0.980655	other
Lppos	0.00181795	0.0390006	0.111	0.067	1	other
Trappc2	0.00593912	0.0389773	0.393	0.305	1	other
Enpp4	0.00018362	0.0389743	0.122	0.068	1	other
Mbtps1	0.000394314	0.0389656	0.318	0.226	1	other
Pappa	0.00159583	0.0389381	0.063	0.032	1	other
Tm2d2	0.00232936	0.0389182	0.321	0.236	1	other
Xpr1	0.00353221	0.0389047	0.727	0.605	1	other
Csk	0.000657899	0.0389026	0.232	0.158	1	other
Agl	0.00464669	0.0388969	0.299	0.223	1	other
Oxnad1	0.00080476	0.0388962	0.104	0.06	1	other
Map3k5	0.00217756	0.0388673	0.232	0.166	1	other
Tmco1	0.00571658	0.0388614	0.336	0.26	1	other
Gm44644	0.0183088	0.0388409	0.807	0.684	1	other
Cbfb	2.10685e-05	0.0388075	0.286	0.184	0.352939	other
Tmem64	0.000545984	0.0387859	0.34	0.243	1	other
Coq10b	0.000760848	0.038779	0.177	0.115	1	other
Mcee	0.00129808	0.038771	0.28	0.201	1	other
Fam227a	0.00147386	0.0387255	0.131	0.082	1	other
Zfc3h1	0.00075942	0.03872	0.207	0.139	1	other
Ankrd12	0.021357	0.0386869	0.758	0.637	1	other
Tdg	0.00145185	0.0386558	0.223	0.155	1	other
Rad17	0.00017114	0.0386501	0.207	0.132	1	other
Psmb7	0.00406466	0.0386472	0.445	0.346	1	other
Mto1	0.00506177	0.0386069	0.196	0.142	1	other
Lyrm9	0.00472254	0.0385639	0.452	0.36	1	other
Zfp652	0.000687105	0.0385329	0.199	0.132	1	other
Map1a	0.011209	0.0384736	0.701	0.573	1	other
Naf1	0.00179098	0.038458	0.147	0.096	1	other
Wiz	0.000354398	0.0384573	0.156	0.096	1	other
Ooep	3.00129e-06	0.0384522	0.039	0.009	0.0508838	other
Fam155a	0.0104005	0.0384139	0.586	0.479	1	other
Zfp941	0.000524335	0.0384115	0.414	0.304	1	other
Cwc27	0.000249248	0.0384077	0.137	0.08	1	other
Gm39244	0.00260657	0.0383848	0.084	0.048	1	other
Ipo5	0.000733577	0.0383453	0.428	0.314	1	other
Gskip	0.00355255	0.0383345	0.367	0.275	1	other
Cct2	0.0124123	0.0383026	0.648	0.526	1	other
Lingo2	0.0204657	0.0382949	0.537	0.447	1	other
Gtf2h5	0.0218064	0.0382944	0.58	0.463	1	other
Bex2	0.0972289	0.0382866	0.964	0.907	1	other
Vmp1	0.00878035	0.0382665	0.303	0.236	1	other
Arel1	0.00349005	0.0382212	0.227	0.162	1	other
Gm45495	0.000104104	0.0382087	0.133	0.075	1	other
Psmd10	0.00311037	0.0381873	0.234	0.168	1	other
Exoc7	0.000516746	0.0381683	0.152	0.094	1	other
Capn7	0.0090121	0.0381673	0.27	0.209	1	other
Mmp2	2.15569e-07	0.0381338	0.043	0.008	0.00369507	other
Trim44	0.0139433	0.0381256	0.742	0.61	1	other
Shisa6	2.80886e-07	0.0381148	0.035	0.005	0.00480932	other
Sdc3	0.0269476	0.0380913	0.562	0.467	1	other
Rad21	0.000750545	0.0380743	0.536	0.404	1	other
Slc25a51	0.00379397	0.0380727	0.615	0.482	1	other
Tshz1	0.0123024	0.0380566	0.27	0.212	1	other
B3galt6	0.000517653	0.0380305	0.205	0.137	1	other
Commd7	0.00377389	0.0380233	0.294	0.221	1	other
Vps50	0.00269084	0.0380212	0.442	0.332	1	other
Gtf2a1	0.0013662	0.0380135	0.336	0.249	1	other
Slc25a20	0.000691881	0.0380099	0.131	0.08	1	other
Ift74	0.000565311	0.0379789	0.123	0.073	1	other
Keap1	0.000463574	0.0379747	0.452	0.332	1	other
Enox1	0.00427395	0.0379651	0.096	0.059	1	other
Edil3	0.00130668	0.0379471	0.577	0.438	1	other
Yeats2	0.00658479	0.0378974	0.314	0.24	1	other
B4galt2	0.00267466	0.0378576	0.276	0.205	1	other
Zdhhc6	0.017201	0.0378312	0.224	0.173	1	other
Sgsm1	0.0151097	0.0378146	0.703	0.568	1	other
Gnptg	0.00224322	0.0377707	0.384	0.289	1	other
Zbtb41	0.000129511	0.0377433	0.202	0.128	1	other
Hbb-bs	0.000413908	0.0377303	0.046	0.018	1	other
Trp53bp1	0.0132059	0.037705	0.61	0.501	1	other
Greb1	0.00190109	0.0375833	0.044	0.02	1	other
Ccdc187	0.000128499	0.037552	0.068	0.03	1	other
Atp5s	0.00629959	0.0375342	0.144	0.099	1	other
Rnf2	0.00121196	0.0375077	0.275	0.197	1	other
Uqcrh	0.0829061	0.037476	0.991	0.963	1	other
Shprh	0.00226605	0.0374566	0.28	0.203	1	other
Stk11	0.00172775	0.0374511	0.278	0.202	1	other
Rpl32	0.00796313	0.0374443	1	1	1	other
Zfp934	0.000484058	0.0374306	0.088	0.047	1	other
Gm3636	0.000475994	0.0374303	0.084	0.044	1	other
Lemd2	0.00227861	0.0374086	0.164	0.111	1	other
Nsg1	0.139942	0.037408	0.94	0.858	1	other
Dyrk3	0.00348434	0.0373871	0.058	0.03	1	other
Alkbh7	0.000863045	0.0373368	0.185	0.121	1	other
Nfs1	0.000616499	0.0373276	0.221	0.15	1	other
Zkscan3	0.00460896	0.0373026	0.276	0.206	1	other
Ddx19a	0.000903651	0.0372831	0.096	0.055	1	other
Ebp	0.000771901	0.0372768	0.085	0.046	1	other
Ints3	0.00161009	0.0372712	0.292	0.214	1	other
Psma1	0.0324566	0.0372313	0.69	0.572	1	other
Zfp760	0.000552854	0.0372251	0.117	0.068	1	other
L1cam	0.0842886	0.0372226	0.698	0.611	1	other
Chmp6	0.0062364	0.0372086	0.185	0.133	1	other
Vps13b	0.000834137	0.0371806	0.275	0.192	1	other
Fbxo8	0.000390763	0.0371769	0.197	0.129	1	other
Tacc2	0.000757248	0.0371417	0.438	0.323	1	other
Rab39b	0.001568	0.0370899	0.297	0.215	1	other
Atp6ap1	0.0128342	0.0370724	0.706	0.575	1	other
Shank2	0.000381736	0.0370582	0.235	0.158	1	other
Ifngr2	0.0191391	0.0370221	0.259	0.204	1	other
Zfp781	6.06381e-06	0.0369867	0.035	0.007	0.102406	other
Krt26	0.00112176	0.0369487	0.041	0.016	1	other
Pak7	0.00422138	0.0369282	0.37	0.285	1	other
Pex7	0.00449791	0.0369043	0.223	0.161	1	other
Wdr83	0.0184033	0.0368869	0.183	0.136	1	other
6430571L13Rik	0.000111404	0.0368771	0.051	0.019	1	other
Ubxn2b	9.2323e-05	0.0368738	0.272	0.18	1	other
Zfp235	0.00286989	0.0368721	0.087	0.051	1	other
Zfp524	0.000329938	0.0368557	0.055	0.023	1	other
Dcp1b	0.000182135	0.0368445	0.112	0.061	1	other
Snrpf	0.0195842	0.0368082	0.769	0.661	1	other
Dap	0.00054754	0.0367676	0.076	0.038	1	other
Taok2	0.00150303	0.0367655	0.295	0.215	1	other
Papd5	0.000503469	0.0367647	0.305	0.216	1	other
Cherp	0.00173141	0.0367304	0.269	0.192	1	other
Lcmt2	0.000195869	0.036727	0.071	0.033	1	other
Tctn1	0.000117917	0.0366607	0.141	0.08	1	other
Prag1	0.0023089	0.0366316	0.092	0.054	1	other
Rsl1	0.00015451	0.0366045	0.046	0.016	1	other
Taf4	0.00150284	0.0366027	0.117	0.072	1	other
Zfp518b	0.0403726	0.0365259	0.101	0.073	1	other
Uqcc2	0.0105642	0.0365037	0.829	0.725	1	other
Stard7	0.00193261	0.0364895	0.515	0.406	1	other
Dhcr7	0.00289018	0.036475	0.201	0.14	1	other
Slc38a2	0.0222739	0.0364714	0.551	0.443	1	other
Echdc1	0.00104028	0.0364702	0.123	0.075	1	other
Stx2	0.0109894	0.0364616	0.098	0.065	1	other
Mapre1	0.0144719	0.0364084	0.585	0.477	1	other
Atp8a2	0.000554916	0.0363895	0.368	0.264	1	other
Slc25a39	0.0118382	0.036379	0.303	0.236	1	other
Tmem169	0.007708	0.0362842	0.142	0.098	1	other
D630045J12Rik	0.00268332	0.03622	0.137	0.09	1	other
Leprotl1	0.000629492	0.036214	0.42	0.306	1	other
Zfp647	0.00028745	0.0362107	0.057	0.024	1	other
Ypel1	0.00209365	0.0361828	0.155	0.102	1	other
Dbr1	0.0103636	0.0361757	0.062	0.036	1	other
Socs7	0.00502296	0.0361712	0.378	0.29	1	other
AI987944	0.00121206	0.0361694	0.112	0.067	1	other
Sox2	0.0208592	0.0361672	0.483	0.394	1	other
Zfp383	0.000292187	0.0360908	0.177	0.11	1	other
Psma4	0.000532749	0.0360814	0.327	0.232	1	other
Zfp668	0.00350423	0.0360742	0.107	0.067	1	other
Psmd9	0.00219606	0.0360732	0.349	0.255	1	other
Ptpn1	0.000327392	0.0360061	0.227	0.151	1	other
Pdhx	0.00329697	0.0359983	0.216	0.157	1	other
Entpd5	6.24457e-05	0.0359304	0.137	0.076	1	other
Drc1	0.00165072	0.0359057	0.175	0.117	1	other
Trappc11	0.00140746	0.0358955	0.207	0.142	1	other
2900026A02Rik	8.29383e-05	0.0358927	0.118	0.063	1	other
Eif4a2	0.0910544	0.0358242	0.997	0.979	1	other
Epm2aip1	0.0313587	0.0358057	0.79	0.69	1	other
Rcbtb1	0.000946935	0.0358004	0.258	0.182	1	other
Gm17354	0.005902	0.0357882	0.13	0.087	1	other
Invs	0.00849235	0.0357694	0.145	0.102	1	other
Lrfn2	0.000186722	0.0357432	0.12	0.067	1	other
Zbtb2	0.0022666	0.035714	0.055	0.027	1	other
Catsperg1	2.93504e-05	0.0357138	0.07	0.028	0.49021	other
Pstk	0.00104669	0.0357078	0.354	0.261	1	other
Ccdc167	0.00228163	0.0356955	0.144	0.094	1	other
Sec22b	0.00739182	0.0356267	0.318	0.244	1	other
Tmem147	0.00110543	0.0355404	0.385	0.282	1	other
Prmt2	0.0476849	0.0355168	0.795	0.668	1	other
Efcab10	0.00525208	0.0354717	0.07	0.04	1	other
Rev1	0.00252348	0.0354601	0.352	0.264	1	other
Guf1	0.00560103	0.0354296	0.387	0.299	1	other
Snx12	0.00583494	0.0354293	0.147	0.101	1	other
Ube2e3	0.000279317	0.0353882	0.419	0.303	1	other
Gm44257	0.00210055	0.0353629	0.065	0.034	1	other
Ccnl1	0.0159775	0.035356	0.461	0.371	1	other
Ctr9	0.00113562	0.0353479	0.24	0.167	1	other
Lin9	0.00342095	0.0353285	0.058	0.03	1	other
Tdrp	0.00120898	0.0353165	0.174	0.115	1	other
Srsf7	0.0101415	0.035309	0.626	0.499	1	other
Kif9	0.000941911	0.0352886	0.1	0.056	1	other
Ago3	0.00401894	0.0352715	0.329	0.253	1	other
Epdr1	0.00804326	0.0352614	0.52	0.425	1	other
Mkl2	0.0386405	0.0352516	0.671	0.575	1	other
Alkbh1	0.0189324	0.0352479	0.423	0.34	1	other
Pkig	0.0224361	0.035247	0.769	0.641	1	other
Psma3	0.0310875	0.0351863	0.763	0.659	1	other
Vps13d	0.00119749	0.0351851	0.24	0.166	1	other
Nipsnap1	0.0147495	0.0351437	0.34	0.264	1	other
Coq3	0.00338579	0.0351253	0.197	0.139	1	other
Cntnap4	0.00938334	0.0350949	0.349	0.273	1	other
Eapp	0.00258537	0.0350764	0.286	0.209	1	other
C920006O11Rik	0.0018149	0.0350656	0.073	0.039	1	other
Bag2	0.000581115	0.0350472	0.139	0.083	1	other
Trmt13	0.00055771	0.0350383	0.213	0.142	1	other
Pak1ip1	0.00347915	0.0350007	0.284	0.21	1	other
Ttc13	0.000478922	0.0349662	0.275	0.192	1	other
Cul4a	0.00221045	0.0348713	0.325	0.243	1	other
Ssbp3	0.0140975	0.0348449	0.73	0.608	1	other
Mark1	0.00482691	0.0348359	0.25	0.183	1	other
Cdo1	0.0162261	0.0348294	0.134	0.097	1	other
Acsl1	0.0024478	0.03482	0.265	0.192	1	other
Mrps30	0.00757976	0.0348044	0.096	0.062	1	other
AW554918	0.00676812	0.0347975	0.103	0.066	1	other
Pgk1	0.00169435	0.0347848	0.529	0.406	1	other
Gm47512	0.00212896	0.0347805	0.093	0.055	1	other
Cep85l	0.00201924	0.0347544	0.088	0.051	1	other
B9d1	0.00462436	0.0347038	0.147	0.099	1	other
Slc7a8	0.000183395	0.0346121	0.251	0.165	1	other
Ophn1	0.00607327	0.0345935	0.196	0.141	1	other
Ascc3	0.00087821	0.0345571	0.239	0.164	1	other
Elmsan1	0.00487971	0.0345501	0.085	0.051	1	other
Ubqln1	0.00545304	0.0345372	0.613	0.481	1	other
Fkrp	0.00330122	0.03452	0.281	0.207	1	other
Rarb	0.00020231	0.0344977	0.068	0.03	1	other
Dock9	0.0213598	0.0344873	0.333	0.268	1	other
Btaf1	0.00313322	0.0344739	0.076	0.043	1	other
Vwc2	0.00343634	0.0344631	0.114	0.073	1	other
Fam189a1	0.00815014	0.0344471	0.088	0.055	1	other
Ulk4	0.000279453	0.0343981	0.179	0.112	1	other
Map3k15	9.94313e-05	0.0343477	0.044	0.015	1	other
1110032A03Rik	0.00952754	0.0343434	0.471	0.374	1	other
Glce	0.00082167	0.0343108	0.284	0.202	1	other
Srsf1	0.0432155	0.034274	0.78	0.656	1	other
Mzt1	0.0114319	0.0342716	0.605	0.504	1	other
Gm32856	3.98732e-05	0.0342657	0.06	0.023	0.664129	other
Gpd1	0.000344326	0.0342327	0.043	0.016	1	other
Gm29543	0.000383	0.0342216	0.054	0.023	1	other
Ccdc115	0.00128751	0.0342089	0.177	0.116	1	other
Clns1a	0.00975617	0.0342078	0.354	0.273	1	other
Sbf2	0.00526655	0.034201	0.393	0.303	1	other
Hk1	0.011662	0.0341303	0.543	0.431	1	other
4632404H12Rik	0.0176807	0.0341297	0.087	0.058	1	other
Igsf9	4.85264e-06	0.0341251	0.175	0.095	0.0820387	other
Pgf	0.00561682	0.0341241	0.126	0.083	1	other
Ltbp4	0.00174981	0.0341131	0.174	0.116	1	other
Snx10	0.0146	0.0341024	0.556	0.455	1	other
Kdm6a	0.000433722	0.0340633	0.212	0.141	1	other
Megf11	0.000350422	0.034045	0.043	0.016	1	other
Cox18	0.00157187	0.0340344	0.155	0.101	1	other
Pcnp	0.0767626	0.0340326	0.872	0.785	1	other
Bmpr1a	0.0181241	0.0340308	0.229	0.179	1	other
Cwf19l1	0.00299379	0.0340282	0.087	0.051	1	other
Zdhhc14	0.00232391	0.0340019	0.197	0.137	1	other
Dock10	0.00851151	0.0339949	0.09	0.057	1	other
Alg13	6.05635e-05	0.0339902	0.06	0.023	1	other
Axin1	0.000280854	0.0339856	0.128	0.074	1	other
Mov10	0.0064111	0.0339749	0.088	0.055	1	other
Arhgef4	0.0184736	0.0339719	0.626	0.52	1	other
Fam91a1	0.00308705	0.0339589	0.441	0.333	1	other
Rcor2	0.000759494	0.0339425	0.057	0.026	1	other
Mrpl20	0.000816302	0.0339147	0.498	0.367	1	other
1700113A16Rik	0.00262468	0.0338917	0.046	0.021	1	other
Srek1	0.0237442	0.033887	0.561	0.454	1	other
Homez	0.00108867	0.0338669	0.09	0.05	1	other
Med8	0.00233627	0.0338474	0.224	0.158	1	other
Acox1	0.0205897	0.0338074	0.513	0.422	1	other
Acvr1	0.00360941	0.0337949	0.096	0.059	1	other
Ptp4a3	0.000824811	0.0337941	0.218	0.147	1	other
Parl	0.00126339	0.0337902	0.212	0.146	1	other
Mfsd8	0.000483658	0.0337655	0.084	0.044	1	other
Pin4	0.0242609	0.0337043	0.401	0.331	1	other
Slain2	0.0378378	0.033683	0.169	0.13	1	other
Nsd2	0.00896645	0.033679	0.529	0.42	1	other
Erlin1	0.0191338	0.0336727	0.144	0.105	1	other
Mrpl3	0.00494717	0.0336599	0.273	0.204	1	other
Ctdnep1	0.00542752	0.0336439	0.297	0.224	1	other
Chic2	0.00197949	0.0336401	0.348	0.261	1	other
Lsm12	0.00185299	0.0336256	0.237	0.168	1	other
Ctsz	0.00245852	0.0336236	0.117	0.073	1	other
Adal	0.00442003	0.0336215	0.109	0.069	1	other
Shc2	0.000565911	0.0336136	0.174	0.111	1	other
Etfrf1	0.00491747	0.0335993	0.227	0.165	1	other
Xrcc5	0.00178796	0.033578	0.13	0.082	1	other
Zfp141	0.000542223	0.0335273	0.104	0.059	1	other
Ccdc84	0.000836185	0.0335194	0.177	0.115	1	other
Klhl42	0.00561919	0.0335018	0.161	0.112	1	other
D130020L05Rik	0.00441679	0.0334787	0.118	0.076	1	other
BC049715	0.00463968	0.0334488	0.047	0.023	1	other
Pigf	0.00824753	0.0334377	0.106	0.069	1	other
Sppl2a	0.00229164	0.0334194	0.186	0.127	1	other
9930104L06Rik	0.000499781	0.0334113	0.111	0.063	1	other
C1qbp	0.00379665	0.0334005	0.362	0.275	1	other
Brd8	0.00490321	0.0333904	0.513	0.403	1	other
Cfap161	2.50809e-05	0.0333786	0.049	0.016	0.419604	other
Acadm	8.48763e-05	0.0333761	0.172	0.101	1	other
9430060I03Rik	0.0078313	0.0333713	0.123	0.083	1	other
Gyg	0.00201602	0.0333588	0.18	0.122	1	other
Ndufab1	0.108806	0.0333567	0.637	0.539	1	other
Polr3b	0.000199922	0.0333554	0.09	0.045	1	other
Gtpbp3	0.0139552	0.0333067	0.085	0.055	1	other
1810043G02Rik	0.00370973	0.0332728	0.344	0.261	1	other
Agfg2	0.00243863	0.0332665	0.19	0.131	1	other
Stx8	0.00151121	0.0332499	0.095	0.055	1	other
2310040G07Rik	0.000179332	0.0332386	0.032	0.009	1	other
Atf1	0.00152893	0.0332364	0.167	0.111	1	other
Taf1	0.00162734	0.0332265	0.414	0.31	1	other
Erich1	0.00828707	0.0332136	0.079	0.048	1	other
Commd3	0.0064374	0.0331262	0.338	0.259	1	other
Mrpl33	0.0502878	0.0331224	0.616	0.516	1	other
Man2c1	0.000382023	0.0330957	0.19	0.121	1	other
Galnt10	0.000245784	0.0330909	0.15	0.09	1	other
Adgra3	5.48933e-05	0.0330619	0.062	0.024	0.911613	other
Gm20696	0.000856097	0.0330556	0.066	0.033	1	other
Rab8b	0.00552672	0.0330218	0.319	0.243	1	other
Gm16701.1	0.000291355	0.0330173	0.084	0.042	1	other
Hacd3	0.0110477	0.0330082	0.6	0.494	1	other
Pcdhga12	0.00141918	0.0330003	0.158	0.104	1	other
Gm12258	0.00446395	0.0329754	0.125	0.083	1	other
Khsrp	0.0167223	0.0329413	0.22	0.167	1	other
Rsph9	0.0138417	0.0329385	0.155	0.112	1	other
Ccdc43	0.0167219	0.0329131	0.18	0.134	1	other
Cc2d2a	0.0155509	0.0328961	0.082	0.053	1	other
Etfa	0.00283252	0.0328832	0.117	0.074	1	other
Cdh4	0.00305312	0.0328816	0.126	0.081	1	other
Nipal2	0.0678029	0.0328408	0.172	0.139	1	other
Pacrg	0.000606192	0.0328393	0.063	0.03	1	other
Smurf2	0.00247656	0.0328106	0.16	0.107	1	other
Gem	0.0014135	0.0328029	0.044	0.019	1	other
Zfp942	0.000864602	0.0327969	0.196	0.131	1	other
Fbxo9	0.0215529	0.0327807	0.622	0.521	1	other
Fmn2	0.00252868	0.032762	0.4	0.3	1	other
Zbtb33	0.00247004	0.0327503	0.166	0.112	1	other
Sgip1	0.0872058	0.03274	0.791	0.68	1	other
Zfp85	3.29476e-05	0.0326995	0.039	0.011	0.549863	other
Ap3b2	0.00422789	0.0326833	0.382	0.293	1	other
Tatdn1	0.0431819	0.0326335	0.476	0.391	1	other
Prmt8	0.0257967	0.0326246	0.117	0.083	1	other
Wdr66	0.000916427	0.0326228	0.076	0.039	1	other
Cox5a	0.00788556	0.032614	0.572	0.456	1	other
Chmp3	0.000198483	0.0325992	0.531	0.391	1	other
Wdr82	0.00278388	0.0325685	0.615	0.474	1	other
Mmadhc	0.00128357	0.0325423	0.182	0.122	1	other
Atf7ip	0.00107571	0.0325229	0.351	0.256	1	other
Arxes1	0.0125934	0.0325212	0.322	0.253	1	other
Ttc9b	0.0102862	0.0325205	0.553	0.44	1	other
Cyb5r4	0.0090318	0.0324815	0.167	0.12	1	other
Rnf11	0.0479282	0.032475	0.918	0.829	1	other
Rgs11	0.000236501	0.0324696	0.186	0.118	1	other
Mfsd11	0.0126227	0.0324657	0.258	0.197	1	other
Fbxw11	0.0101772	0.032461	0.494	0.389	1	other
Trmt10b	0.0151852	0.032455	0.147	0.106	1	other
Kiz	0.00200443	0.0324196	0.088	0.051	1	other
Pnma1	0.00899049	0.032407	0.093	0.06	1	other
Prcp	0.00039228	0.0323863	0.148	0.09	1	other
Eif3d	0.0130637	0.0323801	0.294	0.228	1	other
Rbm34	0.00386191	0.0323684	0.286	0.211	1	other
Trpm7	0.000413666	0.0323234	0.267	0.184	1	other
Zfp316	0.00284897	0.0323073	0.12	0.076	1	other
Ncoa6	0.00841228	0.032306	0.182	0.131	1	other
Chmp1b	0.00335841	0.032271	0.167	0.115	1	other
5330413P13Rik	0.00863976	0.0322656	0.058	0.033	1	other
Kif22	0.00732372	0.0322578	0.19	0.137	1	other
Wdr3	0.00430894	0.0322494	0.118	0.076	1	other
Rnmt	0.00174474	0.0322417	0.409	0.308	1	other
Bbip1	0.00741429	0.0322384	0.385	0.3	1	other
Zxdc	0.00187603	0.0321819	0.141	0.09	1	other
Rassf4	0.000478363	0.0321073	0.052	0.022	1	other
Vamp4	0.0158447	0.0320927	0.534	0.437	1	other
Tmem19	0.0119723	0.03203	0.205	0.154	1	other
Snapc2	0.00235381	0.0320229	0.13	0.083	1	other
Fut9	0.00217296	0.0320208	0.491	0.374	1	other
Mrm3	0.00460689	0.0320134	0.131	0.087	1	other
Inpp1	0.00528906	0.0319353	0.229	0.167	1	other
Tiparp	0.0163368	0.031924	0.076	0.048	1	other
Pnrc1	0.00452727	0.0319168	0.302	0.23	1	other
Fbxl20	0.0124442	0.0319054	0.242	0.185	1	other
Comt	0.000999565	0.0318866	0.472	0.355	1	other
Atxn7l1	0.00966982	0.031827	0.232	0.176	1	other
Ldah	0.00419553	0.0318073	0.229	0.167	1	other
Zmym2	0.0015677	0.0317468	0.308	0.225	1	other
Cox7b	0.0342425	0.0317385	0.717	0.601	1	other
Tmem43	0.00555003	0.0317214	0.197	0.143	1	other
Garem1	0.000573776	0.0317027	0.071	0.035	1	other
Chd2	0.000768798	0.0316104	0.384	0.276	1	other
Luc7l2	0.0813974	0.0316045	0.842	0.761	1	other
Cyb5r3	0.0126818	0.0315984	0.433	0.343	1	other
Ccdc40	0.00291056	0.0315759	0.057	0.029	1	other
Ggnbp2	0.0928605	0.0315669	0.66	0.574	1	other
Mettl16	0.00236278	0.0315658	0.288	0.211	1	other
Mbd1	0.00536495	0.0315488	0.253	0.186	1	other
Pcid2	0.00216293	0.0315458	0.098	0.059	1	other
Arrdc4	5.06477e-05	0.0315423	0.093	0.044	0.841968	other
Wrnip1	0.00149353	0.0315339	0.292	0.211	1	other
Mrps18b	0.00363269	0.0315283	0.126	0.082	1	other
Tprkb	0.00238859	0.0315085	0.371	0.277	1	other
Gm14295	0.0121559	0.0315054	0.196	0.146	1	other
Vps37a	0.00270998	0.0314612	0.258	0.186	1	other
Zfp426	0.0058699	0.0313901	0.161	0.112	1	other
4930522L14Rik	0.000151288	0.0313842	0.022	0.004	1	other
Tcf12	0.000559643	0.0313735	0.212	0.138	1	other
Bcap29	0.00108684	0.0313476	0.368	0.27	1	other
Lars2	0.0416712	0.0313069	0.1	0.072	1	other
Gm5868	3.72246e-05	0.0312929	0.033	0.008	0.620533	other
Tiam2	1.23776e-06	0.0312813	0.024	0.002	0.0210889	other
Col18a1	0.0019839	0.0312712	0.025	0.008	1	other
Snx2	0.0125054	0.0312196	0.295	0.23	1	other
Aste1	0.0180177	0.0312075	0.088	0.059	1	other
Ar	0.0691693	0.0311683	0.75	0.662	1	other
Cstf3	0.0130077	0.0311527	0.531	0.422	1	other
Sgsm2	0.00548643	0.0311492	0.471	0.368	1	other
Fzd7	0.000199867	0.0311373	0.027	0.006	1	other
Bcat1	0.00772706	0.0311087	0.455	0.357	1	other
Cthrc1	0.0198163	0.0311056	0.16	0.119	1	other
Npr2	0.0104509	0.0310937	0.227	0.171	1	other
Ttll7	0.00878891	0.0310876	0.482	0.38	1	other
Mtmr12	0.00145505	0.0310273	0.076	0.041	1	other
Lrrc40	0.00214319	0.0310227	0.145	0.095	1	other
Rrp9	0.0226248	0.0310188	0.106	0.073	1	other
Parvb	0.00357777	0.0309798	0.172	0.118	1	other
Orai3	0.0109481	0.0309635	0.093	0.06	1	other
Dtd2	0.0308994	0.0308917	0.204	0.16	1	other
Lamb3	1.69528e-05	0.0308725	0.036	0.009	0.284299	other
Hibadh	0.0114387	0.0308669	0.237	0.179	1	other
Uso1	0.00138586	0.0308559	0.415	0.31	1	other
Fgf12	0.0362107	0.0308554	0.338	0.273	1	other
B230209E15Rik	0.0468131	0.0308137	0.793	0.68	1	other
Pea15a	0.0248292	0.0308049	0.902	0.805	1	other
BC004004	0.0210844	0.0307996	0.256	0.2	1	other
Arhgef3	0.000732184	0.0307916	0.148	0.092	1	other
Svbp	0.00356549	0.0307872	0.371	0.283	1	other
Cdk13	0.0063423	0.0307632	0.275	0.207	1	other
Gch1	0.000121495	0.0307521	0.051	0.019	1	other
Cpe	0.155133	0.0307246	0.891	0.824	1	other
Tspyl3	0.00396571	0.0307095	0.395	0.304	1	other
Dmtf1	0.000677677	0.030675	0.329	0.235	1	other
Zfp451	0.0112858	0.0306575	0.52	0.419	1	other
Zfp810	0.00174475	0.0306226	0.123	0.076	1	other
Setx	0.00139233	0.0306147	0.321	0.231	1	other
Cst6	0.00330473	0.030609	0.128	0.083	1	other
Gm17322	3.10538e-05	0.0305999	0.044	0.013	0.518536	other
Kansl2	0.00793122	0.030588	0.341	0.262	1	other
P3h4	0.0025074	0.0305681	0.179	0.122	1	other
Nup93	0.000264481	0.0305646	0.058	0.025	1	other
Nfya	0.00436568	0.0305559	0.066	0.037	1	other
Gpn3	0.00742512	0.0305402	0.088	0.055	1	other
Slc8a3	0.0049341	0.030526	0.175	0.123	1	other
Prdx1	0.00596368	0.0304923	0.466	0.368	1	other
Fam104a	0.0177143	0.0304549	0.545	0.435	1	other
Eif4e	0.0482259	0.0304292	0.657	0.565	1	other
Tmem185a	0.00108158	0.0304263	0.235	0.163	1	other
Spopl	0.00516536	0.030417	0.242	0.179	1	other
Caml	0.0114503	0.0304095	0.218	0.163	1	other
Phkb	0.00113693	0.0303793	0.158	0.102	1	other
Col25a1	1.08318e-06	0.0303406	0.202	0.111	0.0184628	other
Ampd2	0.00920151	0.0303198	0.433	0.332	1	other
Lrriq1	0.000318558	0.0303146	0.035	0.011	1	other
Fkbp4	0.00967358	0.0302675	0.532	0.422	1	other
Lonrf2	0.0516037	0.0302515	0.926	0.855	1	other
Fkbp9	0.00260311	0.0302447	0.041	0.018	1	other
Efcab1	0.000243317	0.0301795	0.223	0.146	1	other
Tmem14a	0.00202412	0.0301726	0.231	0.161	1	other
Siae	0.0423135	0.0301629	0.106	0.078	1	other
D6Wsu163e	0.00431391	0.030155	0.114	0.073	1	other
Celf3	0.00685036	0.0301463	0.626	0.49	1	other
Gm3667	0.00617353	0.0300998	0.066	0.037	1	other
6720489N17Rik	3.28499e-05	0.0300842	0.041	0.012	0.548297	other
Gng10	0.00341491	0.0300084	0.033	0.013	1	other
Il6st	0.0024247	0.0299951	0.272	0.196	1	other
Prr14l	0.0037076	0.0299945	0.133	0.087	1	other
Pnn	0.0518657	0.0299843	0.615	0.519	1	other
Rps6kb1	0.00406552	0.0299841	0.439	0.344	1	other
Fahd1	0.00118994	0.0299756	0.13	0.08	1	other
Gnl3	0.0165744	0.0299676	0.398	0.326	1	other
Zfp24	0.00741708	0.0299482	0.235	0.176	1	other
Pex12	0.00351623	0.0299426	0.084	0.049	1	other
Pitrm1	0.0282764	0.0299196	0.112	0.08	1	other
Tmem206	0.00491235	0.0299105	0.062	0.034	1	other
Fbxo17	6.9184e-05	0.0298909	0.071	0.03	1	other
Agtpbp1	0.00852081	0.0298823	0.487	0.374	1	other
[truncated: 15,637 more rows]

## Sheet: male_branch1
	p_val	avg_logFC	pct.1	pct.2	p_val_adjust
Nts	3.18545e-66	1.09328	0.807	0.274	5.51307e-62
Napb	1.41384e-63	0.816459	1	0.839	2.44651e-59
Ap1s2	4.73436e-53	0.805213	0.856	0.382	8.1895e-49
mt-Co2	2.1243e-99	0.764651	1	0.992	3.6776e-95
mt-Atp6	3.19437e-89	0.661572	1	0.999	5.52977e-85
Vsnl1	2.70826e-49	0.65804	0.963	0.581	4.6842e-45
Sv2c	9.31967e-45	0.639129	0.823	0.369	1.61137e-40
mt-Nd4	1.3177e-85	0.62674	1	0.996	2.28081e-81
Pdzrn4	3.45016e-48	0.616504	0.942	0.474	5.96705e-44
Cntnap2	1.45742e-43	0.601103	0.955	0.661	2.51959e-39
mt-Nd1	6.31594e-86	0.596806	1	0.999	1.09329e-81
Adra2a	7.73347e-60	0.556901	0.547	0.098	1.33804e-55
Cadps2	1.17606e-39	0.55104	0.667	0.222	2.03234e-35
Pgr	3.00048e-45	0.544637	0.819	0.302	5.18813e-41
Snca	1.02414e-34	0.539717	0.778	0.35	1.7692e-30
mt-Nd2	8.92883e-68	0.534191	1	0.977	1.5454e-63
Camk4	6.99377e-41	0.526276	0.675	0.225	1.2088e-36
mt-Nd3	5.94819e-47	0.524231	0.988	0.797	1.02856e-42
Hmgcs1	3.78755e-30	0.519046	0.901	0.542	6.53996e-26
Gpr101	1.66106e-26	0.506288	0.654	0.282	2.86632e-22
Nexmif	1.43475e-34	0.505179	0.782	0.331	2.47839e-30
Lamp5	3.10604e-42	0.498139	0.527	0.129	5.36879e-38
Pak3	1.75177e-44	0.485109	0.996	0.888	3.02863e-40
Grin3a	1.25304e-28	0.461378	0.716	0.291	2.16312e-24
Nefl	1.3503e-28	0.455772	0.819	0.419	2.33089e-24
Gad2	1.28346e-38	0.444862	0.996	0.9	2.21781e-34
Aldoc	1.02892e-29	0.442961	0.687	0.278	1.77654e-25
mt-Nd5	1.63796e-33	0.442259	0.992	0.728	2.82908e-29
Tmem215	3.63888e-47	0.43477	0.428	0.072	6.29308e-43
Pappa	3.47806e-54	0.434211	0.383	0.043	6.01669e-50
mt-Cytb	1.21685e-62	0.433196	1	0.999	2.10552e-58
Cplx1	1.65205e-25	0.415003	0.663	0.282	2.84979e-21
Id4	1.13357e-22	0.409805	0.868	0.505	1.95257e-18
mt-Co3	5.01742e-66	0.40247	1	1	8.68316e-62
Rap1gds1	5.79435e-27	0.400538	0.868	0.454	9.99988e-23
Pid1	1.9469e-23	0.40005	0.704	0.325	3.35529e-19
Pgam1	1.37941e-25	0.398218	0.967	0.697	2.37962e-21
Ptp4a1	3.26235e-20	0.392378	0.872	0.568	5.60668e-16
Uqcrb	5.96979e-25	0.391979	0.856	0.436	1.02961e-20
Pdha1	4.84017e-27	0.391774	0.77	0.341	8.35365e-23
Tmem35a	7.31601e-29	0.39093	0.798	0.36	1.26311e-24
Kcnq1ot1	7.25093e-25	0.387525	1	0.765	1.25042e-20
Bend6	2.54303e-23	0.38503	0.897	0.581	4.38214e-19
Slc32a1	5.57088e-23	0.382623	0.938	0.63	9.59695e-19
Nell1	3.17512e-23	0.381942	0.687	0.319	5.47073e-19
Cd83	4.0256e-26	0.380819	0.675	0.281	6.94577e-22
Zfhx4	5.7451e-21	0.378141	0.852	0.485	9.8856e-17
Gfra1	4.49409e-28	0.378099	0.671	0.266	7.7568e-24
Chl1	3.34284e-21	0.372804	0.93	0.582	5.75336e-17
Pcdh7	5.58187e-17	0.369208	0.955	0.699	9.56788e-13
Phyhipl	9.99553e-24	0.367828	0.733	0.347	1.72313e-19
Ankrd46	2.76652e-20	0.367377	0.856	0.494	4.75537e-16
Gpr83	2.65839e-20	0.365617	0.35	0.106	4.57005e-16
Thy1	1.4361e-20	0.364614	0.963	0.74	2.4698e-16
Cdh4	1.66595e-30	0.363817	0.535	0.167	2.87675e-26
Gnai1	8.43745e-17	0.362171	0.778	0.459	1.44576e-12
Fut9	5.68881e-21	0.358422	0.794	0.413	9.7893e-17
Pgm2l1	7.04309e-21	0.357007	0.938	0.628	1.21162e-16
mt-Nd4l	2.50328e-25	0.354064	0.942	0.549	4.31766e-21
Prkce	1.81941e-21	0.353435	0.951	0.612	3.13174e-17
Tspyl4	1.35455e-26	0.352747	0.992	0.846	2.33754e-22
Impact	4.42245e-36	0.352673	1	0.976	7.6411e-32
Scoc	2.31537e-24	0.35241	0.967	0.777	3.99217e-20
Snap25	2.23098e-23	0.351033	0.996	0.877	3.84465e-19
2010107E04Rik	2.50563e-19	0.349905	0.856	0.524	4.30417e-15
Cnr1	3.81292e-17	0.348291	0.84	0.525	6.53726e-13
Kif5c	2.61473e-19	0.347986	0.93	0.656	4.49107e-15
Atp2b1	1.82369e-18	0.343601	0.934	0.635	3.13055e-14
Spock1	1.05469e-19	0.33996	0.951	0.626	1.81195e-15
Dhcr24	6.10039e-25	0.33991	0.638	0.254	1.05207e-20
Ube2v2	1.71488e-20	0.338974	0.852	0.466	2.94907e-16
Syn2	1.04035e-19	0.334638	0.975	0.787	1.78742e-15
Nsf	2.25758e-25	0.333136	0.988	0.894	3.8941e-21
Idi1	4.05768e-28	0.33251	0.481	0.146	7.00396e-24
Crim1	3.29589e-12	0.331956	0.765	0.497	5.60894e-08
Rspo1	4.16667e-26	0.330568	0.539	0.191	7.18875e-22
Khdrbs1	1.57042e-22	0.326225	0.852	0.429	2.70458e-18
Nrip1	3.08955e-20	0.323544	0.523	0.21	5.31e-16
Map1a	2.54627e-19	0.323066	0.914	0.601	4.37373e-15
Got1	4.55853e-17	0.323062	0.798	0.457	7.81468e-13
Fut8	8.74717e-21	0.322685	0.683	0.303	1.50469e-16
Tenm2	5.31222e-21	0.322216	0.691	0.309	9.14179e-17
Dnm3	7.22306e-18	0.321379	0.938	0.668	1.23926e-13
Ctnna2	2.67503e-14	0.319564	0.7	0.402	4.56815e-10
Calb2	7.14843e-20	0.319481	0.778	0.388	1.22824e-15
Lrp1b	6.67653e-17	0.318729	0.947	0.688	1.14436e-12
Ntng1	5.68532e-15	0.316501	0.885	0.626	9.72076e-11
Ina	3.51589e-15	0.315978	0.947	0.731	6.01638e-11
Zmat4	8.02884e-19	0.315799	0.593	0.267	1.37847e-14
Ppp3r1	7.54668e-22	0.315303	0.996	0.812	1.29924e-17
Msmo1	9.21819e-21	0.31501	0.704	0.33	1.58562e-16
Fxyd7	1.252e-22	0.314197	0.691	0.301	2.15644e-18
Scd2	3.14126e-17	0.313943	0.955	0.794	5.38663e-13
Hcn1	2.86212e-17	0.312591	0.663	0.32	4.90824e-13
Ets2	3.63214e-20	0.31205	0.823	0.439	6.24184e-16
Hs6st2	8.99321e-13	0.311243	0.568	0.299	1.53199e-08
Tcaf1	1.53933e-17	0.311165	0.947	0.627	2.64041e-13
Lynx1	3.30277e-16	0.308915	0.815	0.466	5.65731e-12
Drp2	1.17471e-21	0.306936	0.527	0.203	2.02226e-17
Ncdn	6.98209e-16	0.304307	0.926	0.68	1.19533e-11
Ptprm	2.81842e-24	0.30353	0.461	0.15	4.85923e-20
Ecel1	7.02394e-18	0.30221	0.905	0.527	1.20517e-13
Ubl3	9.24586e-14	0.301951	0.823	0.505	1.57744e-09
Mllt11	9.55707e-21	0.301388	0.992	0.85	1.64372e-16
Actg1	1.32e-17	0.301339	0.992	0.871	2.26432e-13
Psd3	2.4848e-15	0.300907	0.79	0.464	4.25274e-11
Irs4	5.14096e-14	0.297198	0.975	0.827	8.77511e-10
Nova1	1.56982e-17	0.297162	0.798	0.427	2.69255e-13
Maged1	3.4046e-17	0.296818	0.975	0.825	5.83753e-13
AF529169	1.89902e-35	0.296474	0.399	0.08	3.28093e-31
Ephb1	5.7077e-18	0.295216	0.519	0.218	9.79384e-14
Pou6f2	3.28598e-23	0.294317	0.292	0.067	5.66141e-19
Stard4	4.37752e-33	0.292953	0.486	0.123	7.55998e-29
Serinc1	4.91148e-20	0.292876	0.996	0.9	8.43989e-16
Acsl3	3.69459e-18	0.29192	0.741	0.355	6.34102e-14
Tmem30a	1.81389e-16	0.291172	0.947	0.711	3.10756e-12
Reln	1.21062e-14	0.290719	0.251	0.08	2.06872e-10
Hspa12a	7.55669e-19	0.29035	0.609	0.268	1.29748e-14
Oxct1	1.46359e-15	0.289646	0.77	0.439	2.50538e-11
Prkcb	3.6999e-15	0.287733	0.786	0.428	6.33089e-11
Syt1	4.84585e-10	0.286998	0.86	0.642	8.17834e-06
Slitrk5	4.07057e-15	0.286078	0.72	0.376	6.96353e-11
Irs2	7.51298e-17	0.2845	0.601	0.275	1.28757e-12
Ajap1	4.83422e-26	0.28282	0.395	0.107	8.34e-22
Cntn1	5.0035e-15	0.282751	0.979	0.827	8.55599e-11
Slc12a5	8.43537e-16	0.280709	0.988	0.822	1.44405e-11
Vamp1	3.15104e-19	0.280425	0.469	0.178	5.4119e-15
Ogdh	3.71967e-15	0.280311	0.844	0.492	6.36436e-11
Idh3a	4.50454e-15	0.279881	0.815	0.497	7.70456e-11
Arf1	6.72721e-16	0.278368	0.971	0.807	1.15177e-11
1190002N15Rik	4.00712e-18	0.278224	0.387	0.136	6.87622e-14
Cox5a	6.49673e-15	0.277793	0.77	0.436	1.11062e-10
Hapln4	6.10036e-21	0.277558	0.556	0.219	1.04963e-16
Atp6v1a	4.18976e-19	0.276983	0.984	0.881	7.19549e-15
Cbln4	2.19885e-20	0.276849	0.449	0.156	3.78092e-16
Ywhab	7.11209e-24	0.27663	1	0.967	1.22612e-19
Atp1b3	1.55803e-12	0.27435	0.786	0.481	2.65379e-08
Pcdh17	5.8131e-19	0.274301	0.996	0.943	9.98284e-15
Hs3st2	1.85022e-40	0.273418	0.309	0.037	3.19774e-36
Rtn3	3.44672e-23	0.272445	1	0.96	5.93801e-19
Tpt1	4.14975e-16	0.272055	1	0.833	7.10769e-12
Adgrl2	3.41899e-22	0.271733	0.461	0.159	5.88749e-18
Hprt	1.55721e-13	0.270671	0.819	0.495	2.65505e-09
Gap43	2.11054e-21	0.270138	1	0.98	3.63266e-17
Epm2aip1	7.04776e-14	0.270133	0.914	0.698	1.20277e-09
Eps15	1.18255e-17	0.269594	0.667	0.306	2.02879e-13
D430041D05Rik	3.2461e-17	0.268088	0.646	0.304	5.56608e-13
Spock3	7.28369e-11	0.267619	0.807	0.521	1.23429e-06
Acvr1c	3.10507e-35	0.267266	0.222	0.019	5.36432e-31
Abat	3.06035e-12	0.266808	0.947	0.722	5.20902e-08
Rpl22l1	1.08057e-23	0.266573	1	0.988	1.86268e-19
Rnf157	9.99955e-14	0.265867	0.728	0.411	1.70592e-09
Atp2a2	7.74242e-15	0.264711	0.967	0.73	1.32333e-10
Arxes2	3.14305e-12	0.264595	0.856	0.559	5.34947e-08
Cd24a	1.59704e-15	0.263531	0.362	0.134	2.73349e-11
Kifap3	1.42429e-11	0.263195	0.926	0.702	2.41945e-07
Sncb	1.86491e-13	0.262926	0.914	0.681	3.1793e-09
Gabra5	1.07462e-19	0.262538	0.576	0.231	1.84608e-15
Hspa4l	2.62114e-11	0.262412	0.864	0.613	4.44938e-07
App	3.95024e-18	0.262305	1	0.939	6.779e-14
Lpgat1	3.36419e-14	0.262115	0.848	0.51	5.74402e-10
Dynll2	5.00521e-22	0.260392	0.996	0.971	8.61797e-18
Fstl5	6.85676e-12	0.259954	0.844	0.562	1.16579e-07
Dynlt3	3.43358e-15	0.259372	0.621	0.303	5.87589e-11
Tppp	1.28423e-13	0.259174	0.905	0.637	2.19012e-09
Glra2	5.84148e-16	0.258633	0.502	0.214	1.00024e-11
Map2k4	5.08853e-12	0.257413	0.926	0.627	8.65507e-08
Rab6b	2.57345e-12	0.257021	0.947	0.734	4.38129e-08
Tsr2	7.33197e-15	0.256071	0.77	0.414	1.25333e-10
Grik1	7.91773e-14	0.255725	0.646	0.323	1.35108e-09
Rab6a	2.28607e-16	0.253795	1	0.894	3.91604e-12
Ldlr	3.4355e-26	0.253187	0.461	0.135	5.92796e-22
5330434G04Rik	5.18525e-13	0.252854	0.86	0.52	8.83567e-09
Parm1	4.15932e-14	0.251772	0.527	0.244	7.10079e-10
Gabrg2	3.73742e-12	0.250402	0.802	0.47	6.35848e-08
Nat8l	1.59282e-13	0.249509	0.794	0.476	2.71561e-09
Grin2a	6.88106e-21	0.248913	0.399	0.127	1.18382e-16
Ppp2ca	8.22089e-13	0.247978	0.922	0.687	1.40051e-08
Ndufa4	1.54729e-13	0.246392	0.914	0.561	2.63844e-09
Kif5a	2.11438e-14	0.245977	0.967	0.742	3.61157e-10
Hsp90b1	2.32937e-10	0.245643	0.831	0.612	3.93757e-06
Clstn2	1.2233e-13	0.245296	0.342	0.136	2.08634e-09
Synj1	1.72269e-14	0.24374	0.975	0.835	2.94287e-10
Smim13	9.58411e-13	0.243682	0.761	0.427	1.63256e-08
Epm2a	2.49069e-20	0.241598	0.486	0.172	4.28225e-16
mt-Co1	1.75169e-43	0.239425	1	1	3.02815e-39
Gpr22	2.97255e-20	0.238905	0.346	0.103	5.10922e-16
Trim32	2.38877e-12	0.237928	0.77	0.458	4.06759e-08
Ubqln2	6.09197e-11	0.237612	0.872	0.612	1.03259e-06
Epha10	3.0851e-22	0.237596	0.44	0.138	5.31284e-18
Lrrtm3	5.70853e-13	0.237152	0.712	0.37	9.72677e-09
Dzank1	2.00313e-10	0.236625	0.947	0.742	3.3875e-06
Ppp2r2c	3.86145e-12	0.236059	0.901	0.661	6.56909e-08
Scml4	8.41002e-17	0.235333	0.436	0.165	1.44114e-12
Pcdh20	1.54863e-13	0.233048	0.663	0.344	2.64056e-09
Plcb1	1.44631e-11	0.232909	0.568	0.304	2.45671e-07
Ids	1.10764e-10	0.232269	0.951	0.748	1.87579e-06
Sema6d	4.53502e-15	0.231905	0.436	0.179	7.75624e-11
Sall1	4.27916e-22	0.231717	0.247	0.051	7.36829e-18
Anks1b	4.95341e-08	0.231152	0.881	0.627	0.000822267
Ywhah	1.97211e-14	0.231111	0.992	0.956	3.36876e-10
Mapk9	2.45879e-10	0.230973	0.815	0.549	4.15536e-06
Rab9b	3.01242e-12	0.230263	0.856	0.531	5.12775e-08
Fgf12	3.34716e-14	0.230106	0.638	0.313	5.71528e-10
Arfgef3	3.92359e-09	0.230082	0.938	0.735	6.57986e-05
Inpp5f	4.32152e-09	0.229343	0.942	0.702	7.2446e-05
Fgf13	9.88862e-12	0.229193	0.523	0.267	1.68037e-07
Smim10l1	1.43952e-10	0.228745	0.942	0.693	2.43668e-06
Ctxn2	2.17298e-09	0.228234	0.807	0.557	3.65322e-05
Dnaja1	1.41131e-10	0.22745	0.93	0.671	2.3892e-06
Slc24a2	1.16168e-13	0.226973	0.58	0.269	1.98159e-09
Pfn2	1.79976e-12	0.226239	0.984	0.831	3.06518e-08
Paip2	2.53899e-11	0.225788	0.918	0.599	4.31045e-07
Nudt4	5.96658e-16	0.225736	0.539	0.232	1.0216e-11
Trhr	5.04541e-09	0.225594	0.325	0.154	8.45105e-05
Hsp90aa1	4.1278e-15	0.224744	0.988	0.921	7.06101e-11
Fam126b	3.94297e-10	0.224414	0.835	0.515	6.6581e-06
Tuba1b	1.56122e-11	0.223922	0.971	0.833	2.65157e-07
Nos1	2.10286e-10	0.223608	0.568	0.316	3.55552e-06
Calm3	1.19132e-13	0.222999	0.992	0.922	2.03191e-09
Tpi1	4.32497e-09	0.221967	0.897	0.704	7.24995e-05
Dcun1d4	1.12339e-09	0.221702	0.782	0.491	1.8928e-05
Cntnap1	2.04329e-13	0.221126	0.523	0.239	3.4832e-09
Hspa5	2.62204e-11	0.220725	0.765	0.454	4.45065e-07
Scn8a	2.42451e-14	0.219648	0.745	0.381	4.14081e-10
Cycs	3.90537e-10	0.218813	0.778	0.474	6.59499e-06
Fam217b	1.11169e-13	0.218267	0.646	0.321	1.89643e-09
Zwint	6.02725e-15	0.217328	1	0.978	1.03048e-10
Galnt16	1.53009e-10	0.217327	0.897	0.633	2.58891e-06
Magi1	1.71954e-10	0.21696	0.868	0.57	2.90877e-06
Lancl3	1.74698e-23	0.21607	0.259	0.052	3.01109e-19
Manea	2.01439e-18	0.214289	0.444	0.158	3.45751e-14
Gm16485	1.86486e-24	0.213766	0.313	0.071	3.21558e-20
Necab1	8.05398e-13	0.212528	0.313	0.117	1.37216e-08
Limk1	2.92014e-14	0.212288	0.56	0.256	4.98643e-10
Pde4b	6.17703e-15	0.212233	0.449	0.186	1.05603e-10
Disp2	1.90917e-11	0.212025	0.984	0.847	3.24177e-07
Brinp3	7.63606e-12	0.211893	0.551	0.281	1.29805e-07
Ndrg4	4.85993e-13	0.21154	0.996	0.931	8.28181e-09
Amigo2	5.604e-15	0.211196	0.403	0.156	9.58227e-11
Hecw1	1.36304e-11	0.21119	0.626	0.333	2.31553e-07
Cpe	1.66171e-09	0.210804	0.967	0.824	2.79665e-05
Ccnb1ip1	4.0838e-11	0.210703	0.432	0.207	6.92735e-07
Fth1	9.64029e-23	0.210523	1	0.999	1.66064e-18
Lypd6b	3.65548e-21	0.210441	0.309	0.08	6.29107e-17
Pcmt1	3.90818e-08	0.21016	0.84	0.544	0.000649461
Fam8a1	2.71591e-09	0.209966	0.79	0.507	4.56055e-05
Dnajc5	7.4749e-13	0.209819	0.996	0.902	1.27357e-08
Kcnip1	4.85454e-12	0.209743	0.568	0.281	8.25758e-08
Bzw1	2.45573e-12	0.209265	0.626	0.317	4.18137e-08
Ywhag	5.87611e-19	0.20833	1	0.987	1.00905e-14
Tspan3	4.24358e-09	0.207602	0.856	0.565	7.11479e-05
Timp2	3.56478e-12	0.207413	0.988	0.895	6.06511e-08
Ywhaq	1.56912e-09	0.20721	0.979	0.823	2.64114e-05
Ppm1m	3.88791e-18	0.207147	0.399	0.137	6.67243e-14
Zcchc18	8.38314e-11	0.205942	0.996	0.892	1.42019e-06
Ppia	1.84405e-12	0.205146	1	0.883	3.14041e-08
Mc3r	5.21473e-22	0.204901	0.243	0.048	8.9782e-18
Gabrb1	8.94649e-09	0.204738	0.963	0.82	0.000149567
Chchd10	2.34083e-09	0.204345	0.885	0.651	3.93423e-05
Cox8a	1.24529e-14	0.204149	0.992	0.969	2.12782e-10
Rbfox3	1.18394e-08	0.204052	0.905	0.651	0.000197658
Srebf2	1.11823e-08	0.203865	0.728	0.453	0.000186744
Ublcp1	2.58073e-14	0.203349	0.432	0.175	4.40737e-10
Megf9	4.76155e-14	0.202526	0.51	0.227	8.12844e-10
Vdac2	8.83886e-10	0.202385	0.733	0.422	1.4897e-05
2900097C17Rik	8.42747e-14	0.201729	1	0.981	1.43798e-09
Tnr	1.53646e-15	0.201659	0.407	0.152	2.62996e-11
Elovl6	2.85733e-12	0.201561	0.646	0.335	4.86404e-08
Sv2a	7.86811e-14	0.201327	1	0.928	1.34269e-09
Prkar1b	1.17422e-11	0.201184	1	0.931	1.99523e-07
Robo2	1.47121e-16	0.201077	0.321	0.103	2.52077e-12
Atp6v1g2	1.52106e-09	0.200952	0.947	0.736	2.56071e-05
Grid2	2.77519e-11	0.200785	0.675	0.372	4.71006e-07
Rac1	1.38188e-08	0.20042	0.934	0.73	0.000230566
Atp5f1	5.06023e-10	0.199824	0.786	0.462	8.53863e-06
Zyg11b	9.6701e-09	0.199721	0.79	0.508	0.000161616
Ackr1	1.51523e-13	0.19967	0.519	0.235	2.58392e-09
Eif1b	2.1071e-09	0.199404	0.967	0.794	3.54351e-05
Mblac2	3.34988e-11	0.199269	0.687	0.37	5.68375e-07
Lsamp	9.23438e-11	0.199145	0.988	0.873	1.56403e-06
Hspa4	3.89635e-09	0.198369	0.765	0.477	6.53457e-05
Got2	1.71089e-09	0.198308	0.848	0.571	2.87874e-05
Endod1	5.9942e-11	0.19804	0.679	0.377	1.01608e-06
Susd4	7.66413e-09	0.197825	0.819	0.498	0.00012819
Hrasls	1.16809e-13	0.19777	0.383	0.151	1.99242e-09
Scn2b	6.87675e-07	0.197414	0.889	0.701	0.0112504
Cntnap4	2.80549e-10	0.197161	0.588	0.31	4.74016e-06
Apba2	3.02607e-11	0.197127	0.646	0.34	5.13494e-07
Chn1	4.75103e-08	0.196986	0.823	0.546	0.000788861
Ryr2	5.38693e-11	0.196648	0.535	0.277	9.13462e-07
Nbea	4.36853e-09	0.196367	0.856	0.619	7.32209e-05
Pgk1	1.07012e-09	0.195493	0.671	0.401	1.80315e-05
Pdcd7	9.3509e-10	0.194935	0.601	0.33	1.57581e-05
Myh10	5.68971e-10	0.194552	0.786	0.465	9.59854e-06
Opn3	6.71325e-19	0.194147	0.247	0.06	1.15273e-14
Htr7	2.64883e-17	0.194106	0.267	0.074	4.54274e-13
Insig1	4.09893e-11	0.194083	0.601	0.309	6.95261e-07
Sqle	1.29732e-14	0.193991	0.416	0.165	2.21659e-10
Nefm	6.8764e-14	0.193747	0.358	0.137	1.1736e-09
Atxn2	4.27011e-09	0.193604	0.654	0.403	7.15883e-05
Tatdn1	2.79694e-12	0.193586	0.617	0.304	4.76151e-08
Tuba4a	4.21864e-10	0.193452	0.86	0.552	7.12191e-06
Nacc2	1.45354e-14	0.193324	0.354	0.13	2.48323e-10
Nrcam	3.87905e-10	0.193184	0.486	0.251	6.55093e-06
Pkp4	5.67591e-10	0.193109	0.724	0.424	9.57583e-06
Stxbp1	6.93212e-12	0.193005	1	0.947	1.17853e-07
Tcf25	2.48797e-09	0.192849	0.992	0.882	4.17929e-05
Cox7a2	5.08777e-08	0.192808	0.942	0.731	0.000844366
Rtn4	5.01102e-08	0.192664	0.942	0.75	0.000831729
Stx1b	1.05372e-07	0.192517	0.938	0.684	0.0017417
Minos1	8.12207e-08	0.192378	0.893	0.708	0.00134445
Nap1l2	4.06978e-13	0.192144	0.572	0.275	6.93612e-09
Ttyh3	7.0953e-10	0.191412	0.675	0.389	1.19655e-05
Ppp3ca	5.67702e-09	0.191339	0.992	0.895	9.50334e-05
Scd1	1.29882e-23	0.191177	0.255	0.05	2.23878e-19
Myo5a	2.43368e-09	0.191107	0.889	0.576	4.08907e-05
Cfl1	5.75167e-09	0.190909	0.979	0.86	9.62657e-05
Fkbp2	6.51229e-08	0.190886	0.782	0.516	0.00107922
Sult4a1	5.31624e-08	0.190291	0.901	0.677	0.000881964
Pnkd	7.13057e-10	0.189679	0.7	0.42	1.20243e-05
Epb41l3	1.77676e-09	0.189479	0.909	0.592	2.98922e-05
Sptbn1	1.37216e-09	0.189014	0.951	0.792	2.31072e-05
Snx10	4.0603e-09	0.188742	0.798	0.508	6.80832e-05
Rnf14	3.28137e-08	0.188554	0.938	0.704	0.000545724
Ube2j1	2.27548e-08	0.188358	0.704	0.456	0.000379049
Hcrtr1	2.68941e-20	0.188168	0.206	0.038	4.6231e-16
Eno2	3.02415e-08	0.187774	0.979	0.832	0.000503249
Acly	5.6106e-09	0.187006	0.691	0.401	9.39327e-05
Ran	6.74924e-08	0.186311	0.947	0.728	0.00111821
Camk2b	1.8145e-08	0.186279	0.971	0.834	0.000302495
Chst2	3.37999e-12	0.185169	0.403	0.169	5.75139e-08
Cacybp	1.30902e-09	0.18444	0.646	0.364	2.20479e-05
Ogfod1	3.17809e-08	0.184372	0.7	0.447	0.000528643
Usp46	1.15932e-10	0.184246	0.65	0.348	1.96318e-06
Cadm2	1.00555e-06	0.184176	0.667	0.429	0.0164026
Caln1	2.65622e-11	0.184161	0.473	0.224	4.50841e-07
Npy1r	4.88316e-10	0.183936	0.276	0.113	8.24034e-06
Pcp4l1	2.32927e-17	0.183722	0.276	0.076	3.99493e-13
Stk39	6.13459e-14	0.183537	0.453	0.189	1.04705e-09
5730455P16Rik	7.55247e-10	0.183337	0.683	0.384	1.2732e-05
Cib2	3.58754e-07	0.18312	0.77	0.52	0.00589396
Acat2	2.22671e-11	0.182865	0.494	0.237	3.78051e-07
Camk2n2	2.57168e-08	0.182466	0.926	0.665	0.000428235
Nipsnap2	1.69639e-11	0.182368	0.502	0.24	2.88081e-07
Ndufb6	7.06186e-11	0.18231	0.547	0.275	1.19677e-06
Dld	1.82844e-11	0.182189	0.477	0.226	3.10488e-07
Atp5b	1.83063e-07	0.182148	0.93	0.684	0.00301908
Ttbk2	1.27566e-07	0.182133	0.819	0.552	0.00210714
Dnajc27	2.55099e-09	0.182032	0.761	0.44	4.28464e-05
Eif4g2	2.81558e-09	0.181933	0.979	0.853	4.72735e-05
Tnfrsf21	1.54122e-09	0.181744	0.667	0.377	2.5945e-05
Tfrc	2.89676e-10	0.181434	0.457	0.227	4.89408e-06
Hnrnpa3	3.60987e-08	0.181393	0.963	0.765	0.000600178
Dner	4.34963e-08	0.180707	0.897	0.648	0.000722604
Sall2	5.51527e-11	0.180352	0.584	0.303	9.35169e-07
Rab2a	1.00023e-07	0.180343	0.914	0.698	0.00165399
Cygb	2.45391e-09	0.180119	0.745	0.438	4.12232e-05
Pgrmc1	8.90334e-09	0.18004	0.975	0.84	0.000148864
St8sia3	2.17102e-09	0.179816	0.823	0.505	3.65014e-05
Chml	4.98419e-16	0.179805	0.288	0.089	8.53593e-12
Copg1	1.15646e-06	0.179797	0.84	0.609	0.0188422
Ola1	1.64062e-11	0.179399	0.584	0.291	2.78626e-07
Scn2a	3.2466e-08	0.178934	0.988	0.838	0.000540008
Pdia3	6.6752e-12	0.178397	0.584	0.291	1.13498e-07
Pclo	1.30737e-09	0.178296	0.918	0.703	2.20213e-05
Ubqln1	9.02586e-09	0.178163	0.802	0.506	0.000150885
Cisd1	9.42837e-10	0.177666	0.72	0.418	1.58877e-05
Crk	1.51047e-10	0.177512	0.728	0.405	2.55602e-06
Mbnl2	1.56815e-08	0.177177	0.86	0.6	0.00026152
Wnk3	2.5587e-11	0.176966	0.514	0.247	4.34365e-07
Sorcs3	3.83157e-09	0.176856	0.597	0.329	6.42707e-05
Kif1b	1.28655e-08	0.176562	0.979	0.836	0.000214725
Kcnb1	3.03523e-09	0.176436	0.63	0.347	5.09464e-05
Lgi2	2.72782e-15	0.176188	0.329	0.111	4.6684e-11
Nars	2.37129e-07	0.176142	0.84	0.562	0.00390623
Hs3st5	2.45376e-09	0.176045	0.461	0.232	4.12231e-05
Rgs2	2.80454e-11	0.175443	0.617	0.337	4.75958e-07
Atp6v1d	4.55106e-09	0.175114	0.782	0.507	7.62667e-05
Mfn2	1.09966e-08	0.174869	0.683	0.407	0.000183665
1500009L16Rik	1.80341e-06	0.174473	0.765	0.521	0.0292459
Eef1b2	5.81402e-08	0.174425	0.959	0.778	0.000963906
Wrnip1	1.70576e-12	0.174133	0.469	0.206	2.90525e-08
Snn	4.55709e-09	0.173894	0.642	0.364	7.63631e-05
Mageh1	1.53203e-10	0.173854	0.502	0.245	2.59204e-06
Greb1	6.55407e-21	0.173822	0.218	0.041	1.12763e-16
9330182L06Rik	3.43679e-11	0.173083	0.424	0.193	5.83052e-07
Slc7a14	4.99833e-08	0.172805	0.811	0.515	0.000829672
Amotl1	1.46966e-07	0.171893	0.7	0.419	0.00242582
Wipf2	5.78258e-11	0.171709	0.65	0.343	9.80321e-07
Sez6l	6.85758e-07	0.17134	0.93	0.751	0.0112204
Mrpl42	3.44442e-10	0.171004	0.621	0.328	5.81832e-06
Cdh2	2.09525e-07	0.170672	0.86	0.597	0.00345361
Atp5g3	6.77825e-07	0.170439	0.807	0.56	0.0110919
Wdr47	1.44584e-07	0.1704	0.757	0.483	0.00238665
Cyp51	1.10911e-14	0.170263	0.457	0.184	1.89547e-10
Fam20b	3.63386e-08	0.17004	0.683	0.412	0.000604093
Gng4	1.02453e-07	0.169285	0.621	0.374	0.00169374
Phlda3	2.37374e-09	0.169101	0.547	0.29	3.98884e-05
Neo1	4.76719e-09	0.168892	0.486	0.259	7.98743e-05
Rab1a	7.49509e-07	0.168845	0.889	0.681	0.0122567
Kcna6	1.83915e-08	0.16868	0.683	0.398	0.000306586
Kcnab2	7.9797e-12	0.168442	0.461	0.209	1.35631e-07
Zrsr2	4.59795e-08	0.168199	0.774	0.478	0.000763582
Atp5e	2.56644e-06	0.16795	0.926	0.714	0.041484
Ube2ql1	3.36178e-08	0.167947	0.609	0.344	0.000559064
Gdi2	2.71875e-07	0.167917	0.852	0.569	0.00447452
Fbxo33	7.19038e-09	0.167614	0.7	0.401	0.000120295
Tmx2	1.03682e-06	0.167288	0.848	0.627	0.0169084
Rnd2	9.00526e-10	0.167139	0.733	0.407	1.51766e-05
Ghitm	1.00506e-06	0.167004	0.844	0.589	0.0163955
Cnbp	1.12277e-06	0.166836	0.786	0.514	0.0183
Atp5a1	1.22127e-07	0.166053	0.942	0.755	0.00201754
Nbdy	1.47736e-07	0.165626	0.835	0.538	0.00243837
Tango2	1.00453e-07	0.165615	0.749	0.472	0.0016609
Adss	2.56721e-09	0.165461	0.531	0.281	4.31137e-05
Mycbp2	1.63194e-08	0.165411	0.996	0.871	0.00027211
Ndufs4	2.19153e-11	0.165267	0.597	0.293	3.721e-07
Abce1	2.56264e-09	0.165169	0.506	0.266	4.30395e-05
Slc5a5	5.16948e-09	0.165011	0.56	0.312	8.65732e-05
Epb41	5.16377e-10	0.164768	0.539	0.273	8.71283e-06
Bcl2l2	8.67998e-11	0.164568	0.539	0.264	1.4703e-06
Kazn	1.68204e-09	0.164425	0.481	0.247	2.83054e-05
Kalrn	7.07264e-10	0.164412	0.782	0.448	1.1928e-05
Slc35f1	1.17208e-08	0.164164	0.432	0.22	0.000195703
Fat3	8.48761e-09	0.164102	0.453	0.238	0.000141921
Vps41	1.06417e-08	0.163695	0.667	0.375	0.000177749
Robo1	3.29486e-10	0.163675	0.407	0.194	5.56601e-06
Ssb	5.73175e-09	0.163629	0.716	0.433	9.59381e-05
Ipo7	6.72398e-09	0.163108	0.535	0.289	0.000112506
Cand1	1.32784e-07	0.162997	0.7	0.43	0.00219306
Peg3	4.25581e-12	0.162526	1	0.992	7.23956e-08
Pde1a	2.64277e-10	0.162392	0.342	0.152	4.46575e-06
Map1b	1.26279e-10	0.162302	1	0.977	2.13803e-06
Csnk1g2	5.67549e-11	0.162148	0.621	0.313	9.62222e-07
Cstf2	2.71827e-08	0.161937	0.58	0.326	0.000452511
Pafah1b1	3.41475e-08	0.161698	0.996	0.872	0.000567805
Fam168b	5.91431e-07	0.161691	0.798	0.523	0.00968646
AI504432	4.05292e-08	0.161373	0.7	0.426	0.000673433
Syndig1	1.42993e-14	0.161311	0.313	0.105	2.44303e-10
Pik3ca	7.92265e-08	0.161301	0.675	0.401	0.00131159
Fads1	1.96343e-09	0.160902	0.424	0.207	3.30268e-05
Fam168a	5.44366e-08	0.160647	0.79	0.496	0.000902886
Slco3a1	3.86515e-09	0.160509	0.374	0.18	6.48302e-05
Ube2n	9.8551e-07	0.160492	0.872	0.641	0.0160825
Ndufv2	3.51492e-09	0.160257	0.733	0.415	5.89839e-05
Gm9493	4.04611e-13	0.160191	0.387	0.155	6.89619e-09
Fgfr1	2.87404e-09	0.15999	0.646	0.372	4.82522e-05
Dtd1	1.0773e-07	0.159962	0.539	0.308	0.00178057
Larp4b	4.05125e-07	0.159894	0.856	0.563	0.00665094
Tpd52l1	2.40222e-09	0.159605	0.37	0.175	4.03646e-05
Nsdhl	2.02674e-16	0.159527	0.247	0.065	3.472e-12
Sucla2	6.31506e-10	0.159382	0.626	0.335	1.06522e-05
Tubb4b	3.88937e-09	0.159341	0.638	0.365	6.52326e-05
Meg3	2.13351e-14	0.159176	1	1	3.64403e-10
Cadps	2.24628e-06	0.159102	0.893	0.649	0.0363695
Kidins220	2.49996e-07	0.159	0.909	0.638	0.00411719
Sept8	7.53573e-10	0.158721	0.72	0.393	1.27045e-05
Rasgrp2	1.4041e-10	0.15858	0.531	0.259	2.37714e-06
Ryr3	5.40556e-12	0.158557	0.3	0.113	9.19378e-08
Vps13d	7.48195e-11	0.158416	0.428	0.193	1.26782e-06
Vps35	2.16534e-09	0.157955	0.724	0.405	3.6408e-05
Mir124-2hg	6.61319e-12	0.157718	0.416	0.183	1.12451e-07
Nrsn1	3.70018e-07	0.157684	0.996	0.944	0.00607791
Mapk1	5.59822e-08	0.157647	0.963	0.808	0.000928297
B4gat1	5.58834e-09	0.157615	0.494	0.258	9.35656e-05
Rad23b	4.21693e-07	0.157353	0.819	0.591	0.00691998
Rab11fip5	8.52963e-12	0.15732	0.556	0.259	1.44961e-07
3632451O06Rik	1.11224e-14	0.156945	0.296	0.094	1.90071e-10
Zfyve9	4.33352e-11	0.156833	0.395	0.173	7.35009e-07
2610002M06Rik	3.19341e-11	0.156394	0.486	0.228	5.41857e-07
Glud1	1.27472e-08	0.156235	0.786	0.469	0.000212764
Pitpna	1.8315e-06	0.155898	0.786	0.55	0.0296978
Kcnc1	1.55436e-07	0.15551	0.835	0.532	0.00256469
Inpp4b	4.44076e-11	0.155251	0.272	0.102	7.53153e-07
Pou3f2	3.70455e-09	0.155107	0.218	0.083	6.21513e-05
Prkar1a	2.79406e-08	0.154572	0.996	0.954	0.000465071
3110035E14Rik	1.12858e-09	0.154075	0.28	0.116	1.90143e-05
Igip	1.06477e-06	0.154072	0.856	0.58	0.0173578
Fbxo9	1.24621e-06	0.153856	0.815	0.542	0.0202934
Vdac1	9.65698e-07	0.153562	0.885	0.656	0.0157612
Ndfip2	9.93591e-09	0.153369	0.658	0.373	0.000166049
Lgi1	3.35802e-12	0.1529	0.506	0.228	5.71434e-08
Tiparp	5.03719e-16	0.152812	0.243	0.065	8.62618e-12
Nt5dc3	4.35078e-09	0.152733	0.584	0.317	7.29279e-05
Lrfn5	2.48458e-06	0.152721	0.942	0.721	0.0401856
Shroom2	2.43501e-09	0.152492	0.486	0.25	4.09107e-05
Brinp2	1.69407e-09	0.152371	0.605	0.325	2.85061e-05
Pfkp	2.20738e-08	0.151748	0.543	0.302	0.00036775
Kcnh1	1.23678e-09	0.151736	0.428	0.212	2.08335e-05
Miga1	9.98968e-09	0.151728	0.687	0.385	0.000166938
Rgs17	1.31256e-06	0.151531	0.951	0.761	0.0213659
Cfap36	2.02225e-10	0.151425	0.547	0.268	3.41962e-06
Dnm1l	1.67642e-06	0.151386	0.914	0.652	0.0272166
Clip4	8.5734e-11	0.151095	0.494	0.231	1.45233e-06
Calm2	1.43849e-09	0.151006	1	0.988	2.42213e-05
Mbnl1	5.52779e-08	0.150955	0.712	0.42	0.000916673
Fstl1	8.30167e-12	0.15082	0.3	0.114	1.41095e-07
Wdr1	6.92691e-08	0.150599	0.745	0.449	0.00114744
Hmgcr	2.58118e-08	0.150579	0.687	0.397	0.000429792
Ank1	8.66239e-12	0.150363	0.333	0.134	1.47209e-07
Tnfrsf19	6.03661e-20	0.150243	0.181	0.029	1.03727e-15
Zrsr1	7.31819e-09	0.150159	0.617	0.34	0.000122419
Snx5	4.14774e-10	0.149917	0.44	0.21	7.00263e-06
Idh1	5.80931e-11	0.149739	0.486	0.229	9.84794e-07
Pnma3	8.9435e-09	0.149691	0.691	0.396	0.000149526
Vps4a	1.93875e-08	0.149196	0.576	0.31	0.000323151
Aplp2	1.37325e-06	0.149193	0.934	0.748	0.0223414
Mob4	2.55586e-06	0.149144	0.811	0.536	0.0413154
Umad1	5.44236e-08	0.148987	0.543	0.301	0.000902724
Slc36a4	2.74369e-07	0.148776	0.638	0.391	0.0045153
Large1	3.18786e-10	0.148762	0.49	0.239	5.38558e-06
Tspyl3	4.65078e-08	0.148451	0.523	0.289	0.000772263
Rab3a	2.67087e-06	0.147816	0.979	0.846	0.0431532
Glra3	2.43569e-08	0.147648	0.531	0.289	0.00040564
Gpbp1	9.2267e-08	0.147444	0.638	0.372	0.00152619
Ppid	1.56163e-09	0.147295	0.465	0.229	2.62869e-05
Rps24	3.56201e-09	0.147266	1	0.995	5.9767e-05
Gpd2	4.82153e-09	0.146931	0.63	0.34	8.0775e-05
Sacm1l	8.99523e-08	0.146684	0.481	0.266	0.00148808
Lhfpl3	3.26955e-12	0.1465	0.444	0.194	5.56444e-08
Usp34	9.22652e-07	0.146435	0.942	0.731	0.0150641
Cacng3	7.35985e-12	0.146433	0.292	0.108	1.25117e-07
Unc80	1.8031e-06	0.146382	0.909	0.675	0.0292427
Krt222	7.83596e-12	0.146087	0.321	0.126	1.33196e-07
Luzp1	6.20248e-12	0.146036	0.428	0.187	1.05486e-07
Ube2d2a	9.31397e-07	0.145862	0.872	0.637	0.015206
Lypd6	4.17427e-13	0.145693	0.362	0.14	7.11379e-09
Fam171b	4.0272e-07	0.145413	0.942	0.762	0.00661186
Ndufb8	2.3631e-06	0.145393	0.893	0.639	0.0382444
Spcs3	2.40339e-10	0.145337	0.412	0.186	4.06244e-06
Rnd1	6.37666e-11	0.145221	0.379	0.165	1.08078e-06
Rerg	3.81033e-15	0.145208	0.243	0.068	6.5191e-11
Eloc	3.83545e-08	0.145182	0.737	0.439	0.000637452
Hspd1	7.58179e-08	0.144787	0.724	0.426	0.00125554
Cs	1.1915e-06	0.144454	0.621	0.392	0.0194096
Rabgap1l	3.85982e-07	0.14435	0.691	0.411	0.00633898
Txnl1	2.10161e-09	0.144333	0.642	0.346	3.53449e-05
Smap1	3.09758e-08	0.144265	0.551	0.303	0.000515376
Mfsd6	8.26022e-07	0.143996	0.712	0.439	0.0134989
Mff	5.64412e-07	0.143873	0.848	0.558	0.00924845
Prkacb	2.96895e-06	0.143784	1	0.94	0.0479366
Fam84a	2.07436e-10	0.143502	0.551	0.277	3.50754e-06
Nudt10	6.33101e-08	0.143443	0.576	0.324	0.0010493
Klc2	1.59284e-07	0.143415	0.737	0.429	0.00262786
Psmc6	1.0219e-08	0.143298	0.621	0.344	0.000170739
Zfp638	1.33948e-08	0.143012	0.601	0.325	0.000223532
Arxes1	1.9316e-10	0.14281	0.527	0.256	3.26692e-06
Fundc2	4.54079e-09	0.142588	0.527	0.276	7.60991e-05
Gm9866	2.77461e-10	0.142584	0.457	0.216	4.68825e-06
Nfe2l1	1.75794e-06	0.142173	0.905	0.675	0.0285208
Nrxn3	8.65364e-08	0.141419	1	0.992	0.00143209
Cobl	4.08519e-09	0.141336	0.354	0.165	6.84964e-05
Ctnnb1	1.13181e-06	0.141312	0.815	0.574	0.0184451
Ptcd3	1.58859e-10	0.141236	0.333	0.139	2.68757e-06
Ddah1	8.71523e-11	0.140883	0.465	0.215	1.47619e-06
Armcx1	6.6857e-08	0.140825	0.551	0.309	0.00110782
Ypel5	6.95514e-07	0.140816	0.584	0.346	0.0113765
Enox2	5.84111e-08	0.140672	0.276	0.127	0.000968339
Copg2	1.71049e-07	0.140575	0.56	0.317	0.00282129
Nhs	5.55049e-10	0.140481	0.374	0.168	9.36479e-06
Chp1	1.31101e-06	0.140323	0.86	0.568	0.0213419
Unc13c	4.87174e-10	0.140173	0.165	0.05	8.22155e-06
Sc5d	1.67446e-09	0.140074	0.502	0.252	2.81795e-05
Wwp1	1.32936e-09	0.139862	0.305	0.13	2.2389e-05
Slc4a10	4.58187e-07	0.139831	0.675	0.409	0.0075161
Rgs8	4.66634e-10	0.139791	0.329	0.143	7.87631e-06
Nedd4	1.64418e-06	0.139742	0.975	0.829	0.0267014
Cyb5b	5.81284e-07	0.139715	0.765	0.486	0.00952144
Pdia6	2.67672e-08	0.13957	0.58	0.317	0.000445673
Pwwp2a	7.47605e-10	0.139472	0.379	0.172	1.26046e-05
Rims2	1.76359e-06	0.139325	0.695	0.437	0.0286089
Sdhc	3.39085e-07	0.139215	0.621	0.369	0.00557218
Rheb	1.06144e-06	0.13848	0.798	0.49	0.0173057
Adcy7	2.48529e-08	0.138438	0.313	0.146	0.000413875
Cbx4	8.30913e-11	0.138319	0.354	0.151	1.40773e-06
Ndufa1	4.33044e-07	0.138226	0.7	0.41	0.00710581
Adam11	1.17056e-07	0.138132	0.42	0.22	0.00193411
Klhl7	9.92678e-07	0.137943	0.658	0.396	0.0161985
Rassf5	1.71541e-09	0.137778	0.337	0.149	2.88617e-05
Strap	9.98177e-07	0.137755	0.716	0.432	0.0162863
Scn1b	6.14719e-07	0.137471	0.683	0.424	0.0100648
Col4a3bp	4.82315e-11	0.137077	0.556	0.264	8.17957e-07
Armc1	3.58598e-07	0.137007	0.642	0.384	0.00589177
Nus1	3.09682e-07	0.136964	0.658	0.388	0.00509147
Stc1	1.79631e-10	0.136953	0.305	0.125	3.03846e-06
Htr1b	4.56988e-08	0.136884	0.399	0.203	0.000758966
Uqcrq	2.08804e-06	0.136848	0.893	0.652	0.0338242
Camta1	2.95222e-07	0.136271	0.996	0.897	0.00485669
Exoc5	4.52084e-07	0.136089	0.588	0.345	0.00741689
Glrx	2.59659e-10	0.135892	0.325	0.137	4.38799e-06
Erich3	8.70655e-10	0.135789	0.403	0.185	1.46758e-05
Sacs	2.22237e-10	0.135715	0.342	0.146	3.75692e-06
Tex2	1.1348e-08	0.13528	0.605	0.33	0.0001895
Fuca2	3.66816e-10	0.135117	0.403	0.184	6.19516e-06
Tshz1	1.0443e-08	0.134716	0.366	0.175	0.00017445
Tnpo3	9.48145e-08	0.134453	0.613	0.348	0.00156823
Atp5o.1	2.60037e-06	0.133829	0.741	0.492	0.0420297
Gabra1	4.81141e-07	0.133363	0.728	0.462	0.00788976
Txndc5	2.90153e-09	0.133238	0.531	0.271	4.87109e-05
Slc25a5	1.44201e-10	0.133162	0.453	0.205	2.44075e-06
Kcnq3	4.55375e-07	0.133153	0.634	0.385	0.00747042
Garnl3	2.68327e-08	0.132928	0.481	0.25	0.000446738
Dnajc15	9.06475e-08	0.132824	0.494	0.268	0.00149949
Paics	5.0912e-09	0.132365	0.42	0.203	8.52725e-05
Doc2b	3.79715e-09	0.132174	0.424	0.203	6.3701e-05
Ss18l2	2.62757e-07	0.131968	0.695	0.408	0.0043263
Rprm	1.23265e-08	0.131933	0.527	0.29	0.000205766
Hspa9	1.30853e-06	0.13182	0.695	0.434	0.0213029
Frmd4a	3.94097e-08	0.131756	0.634	0.356	0.000654871
Diaph3	2.21081e-10	0.131742	0.251	0.093	3.73759e-06
Mpc1	3.23628e-07	0.131442	0.588	0.343	0.00531948
Dgkq	1.71347e-10	0.13136	0.49	0.227	2.89868e-06
Idnk	9.80238e-08	0.131332	0.436	0.231	0.00162122
Cox6b1	2.19063e-06	0.131329	0.963	0.761	0.0354729
Lrrfip2	3.71383e-08	0.13128	0.42	0.213	0.000617275
Ptpn5	1.67808e-06	0.131036	0.802	0.537	0.0272402
Chst11	4.97557e-11	0.130814	0.387	0.165	8.43756e-07
Cbln2	1.2637e-07	0.130697	0.202	0.083	0.00208751
Slc35e3	2.06642e-08	0.130523	0.481	0.247	0.000344348
Snrpd1	3.60102e-07	0.130473	0.564	0.316	0.00591575
0610010F05Rik	1.46615e-09	0.130353	0.469	0.226	2.46842e-05
Picalm	5.616e-07	0.130292	0.597	0.354	0.00920294
Sez6	1.0994e-07	0.130199	0.457	0.238	0.00181698
Diras1	5.38438e-08	0.12988	0.531	0.289	0.000893161
Polr3k	4.4228e-10	0.129837	0.494	0.243	7.46613e-06
Armcx4	1.3724e-07	0.129815	0.527	0.288	0.00226625
Kif2a	6.99071e-07	0.129617	0.609	0.364	0.0114333
Nuak1	2.33973e-07	0.129291	0.387	0.2	0.00385517
Brcc3	4.0562e-11	0.12901	0.432	0.19	6.88094e-07
Cdkl2	1.32793e-06	0.128936	0.626	0.372	0.0216134
Pcmtd1	9.48965e-07	0.128839	0.593	0.349	0.0154909
Myo9a	3.01345e-07	0.128276	0.576	0.327	0.00495623
Agtpbp1	1.1528e-06	0.128239	0.597	0.35	0.0187837
Slc36a1	3.37796e-11	0.128204	0.267	0.097	5.73105e-07
Gm10419	1.17709e-08	0.127991	0.523	0.273	0.000196527
Atxn7l1	1.24015e-10	0.127677	0.374	0.16	2.09982e-06
Tmsb4x	4.59049e-07	0.12763	1	0.991	0.00752978
Mien1	7.71174e-07	0.127363	0.667	0.4	0.0126072
Nap1l3	2.29147e-06	0.126975	0.63	0.382	0.0370967
Tmem164	1.89265e-10	0.126269	0.239	0.085	3.20123e-06
Cmpk2	6.16306e-10	0.126202	0.379	0.167	1.03965e-05
Fasn	6.30868e-09	0.126176	0.617	0.327	0.000105563
Clvs1	3.51495e-09	0.126172	0.403	0.192	5.89809e-05
Emc8	1.21439e-09	0.126143	0.428	0.202	2.04589e-05
Mthfd2l	2.19601e-08	0.126055	0.428	0.217	0.000365877
Zfp385b	5.51832e-11	0.125936	0.333	0.136	9.35632e-07
Wnt4	2.7106e-07	0.125859	0.288	0.138	0.00446165
Ccdc85a	1.39822e-07	0.125178	0.469	0.25	0.00230874
Lrrfip1	4.73867e-10	0.125155	0.333	0.143	7.99792e-06
Mib1	1.67805e-06	0.125104	0.547	0.321	0.0272415
Cmpk1	1.8337e-06	0.124975	0.72	0.438	0.0297297
Arl6	2.31804e-09	0.124923	0.395	0.184	3.89615e-05
Arf2	1.04802e-07	0.12481	0.383	0.192	0.00173238
Arhgef7	3.45482e-07	0.1248	0.646	0.374	0.00567696
Il1rap	2.36195e-08	0.12451	0.362	0.176	0.000393429
Tmem150c	2.52277e-09	0.124363	0.44	0.21	4.2375e-05
Lrrc59	8.27044e-09	0.124259	0.391	0.189	0.000138307
Pde11a	3.15278e-13	0.12409	0.177	0.043	5.37391e-09
Arfgef1	8.91697e-08	0.123976	0.576	0.318	0.00147531
Sephs2	1.40422e-06	0.123945	0.469	0.268	0.0228341
Adarb1	1.66224e-07	0.123772	0.543	0.295	0.00274219
Fam92a	1.39114e-08	0.123348	0.531	0.275	0.000232098
Gnptab	5.98523e-08	0.123322	0.399	0.203	0.000992113
Opa1	2.4936e-06	0.123279	0.551	0.315	0.0403266
Nrgn	2.29841e-09	0.123229	0.63	0.352	3.8634e-05
Selenof	5.72582e-07	0.123172	0.675	0.41	0.00938061
Mpped1	3.38083e-07	0.122975	0.247	0.113	0.00555606
Pnpo	9.35702e-09	0.122747	0.395	0.19	0.000156412
Ifitm10	3.42819e-09	0.122519	0.313	0.137	5.75353e-05
Dbndd2	2.46358e-07	0.122171	0.506	0.276	0.00405776
Spred2	3.14883e-09	0.121689	0.477	0.24	5.28499e-05
Lancl2	1.15744e-08	0.121534	0.449	0.221	0.00019327
Arhgap5	9.55221e-07	0.121267	0.654	0.392	0.0155921
A230057D06Rik	1.66602e-06	0.121247	0.617	0.376	0.0270512
H1f0	3.48384e-09	0.121108	0.502	0.246	5.84658e-05
Fdps	1.87989e-07	0.120701	0.313	0.153	0.00310012
Scn5a	1.7777e-09	0.120612	0.243	0.094	2.99063e-05
Eef1e1	3.08005e-07	0.120496	0.535	0.297	0.00506484
Cntnap5a	1.37869e-06	0.120479	0.687	0.413	0.0224286
Fam124a	2.63075e-09	0.120366	0.28	0.115	4.41783e-05
Cthrc1	1.62206e-06	0.120331	0.23	0.108	0.0263438
Cops6	4.06479e-07	0.120292	0.58	0.33	0.00667276
Atp1b1	5.77385e-07	0.120125	1	0.967	0.00945814
Hcn2	2.97573e-08	0.119974	0.317	0.146	0.000495221
Klhl32	7.33645e-09	0.119919	0.37	0.173	0.000122717
Ndufaf4	4.48213e-08	0.119626	0.543	0.288	0.000744527
Cep19	8.30485e-07	0.119609	0.551	0.315	0.0135701
Ank	2.69886e-08	0.119601	0.465	0.24	0.000449307
Tmed8	1.67122e-06	0.119466	0.621	0.371	0.027134
Slitrk1	6.55454e-07	0.119352	0.654	0.391	0.0107285
Rell2	2.39485e-06	0.119284	0.642	0.382	0.0387534
Camkk1	1.55335e-07	0.119077	0.469	0.254	0.00256318
Nt5c3	1.64097e-09	0.118876	0.473	0.226	2.76191e-05
Kcna1	1.17514e-11	0.118865	0.177	0.049	1.99668e-07
Vps50	2.366e-09	0.118699	0.519	0.261	3.97631e-05
Akirin1	1.75679e-06	0.118232	0.568	0.33	0.0285039
Lyrm9	5.6643e-07	0.118232	0.667	0.392	0.00928095
Kcnq5	9.43328e-11	0.118015	0.243	0.085	1.59762e-06
Rnf114	9.11309e-07	0.117793	0.428	0.232	0.0148798
Psmd5	8.47175e-08	0.117771	0.527	0.284	0.00140216
Ehd3	2.22537e-06	0.117714	0.58	0.346	0.0360333
Plcxd2	2.07276e-06	0.117628	0.477	0.269	0.0335787
Gm32014	4.6271e-15	0.117608	0.152	0.028	7.91327e-11
Aldh5a1	5.24548e-09	0.117239	0.605	0.309	8.78408e-05
Dip2a	8.01408e-08	0.117086	0.35	0.168	0.00132665
Fdft1	3.01044e-07	0.117047	0.523	0.29	0.00495157
Snph	5.63624e-08	0.11698	0.58	0.318	0.000934489
Dock3	1.3579e-06	0.116925	0.638	0.383	0.0220958
Dlat	2.03181e-08	0.116632	0.572	0.306	0.000338622
Fam81a	1.37224e-07	0.116575	0.35	0.174	0.00226611
Grik2	1.23447e-08	0.116548	0.44	0.219	0.000206058
Gm10073	7.29088e-09	0.116501	0.305	0.135	0.000121969
1810030O07Rik	6.19967e-09	0.116496	0.309	0.136	0.000103745
Unc13a	7.85023e-07	0.116466	0.576	0.327	0.0128312
Baalc	7.70361e-08	0.116279	0.514	0.269	0.00127564
Cdh12	8.42903e-09	0.11621	0.243	0.097	0.00014095
Tmem127	7.03107e-08	0.116165	0.424	0.216	0.00116456
Sept6	1.362e-09	0.115642	0.436	0.205	2.29375e-05
Nectin3	3.57375e-10	0.115509	0.296	0.12	6.03607e-06
Phf6	3.08022e-07	0.115168	0.44	0.238	0.00506481
Pim3	1.38064e-09	0.115029	0.329	0.142	2.32485e-05
Dhcr7	6.60151e-12	0.115001	0.366	0.146	1.12259e-07
Cdh8	1.33751e-06	0.114818	0.35	0.185	0.0217667
Ndufaf5	4.60371e-10	0.114726	0.267	0.102	7.77107e-06
Ece2	3.61165e-08	0.114687	0.44	0.22	0.000600437
Cacul1	1.54426e-06	0.114404	0.65	0.371	0.0250864
Mindy3	1.50505e-10	0.114376	0.379	0.163	2.54715e-06
Acp2	6.02322e-07	0.114253	0.646	0.374	0.00986362
Slc4a3	1.3674e-06	0.114145	0.568	0.334	0.0222489
Chpt1	3.7054e-08	0.114101	0.412	0.207	0.000615949
AC101921.1	7.18993e-10	0.113119	0.169	0.052	1.21229e-05
Hars	1.21074e-08	0.113083	0.412	0.196	0.000202121
Dnajc21	7.05893e-08	0.113039	0.56	0.305	0.0011691
Prdm16	7.83763e-08	0.112777	0.226	0.095	0.00129768
Clvs2	3.81497e-09	0.112728	0.362	0.164	6.39961e-05
Mypop	5.62434e-08	0.112564	0.412	0.204	0.000932572
Zdhhc6	8.8693e-07	0.112214	0.342	0.176	0.0144836
Tmem70	1.02666e-08	0.111368	0.354	0.164	0.000171513
C330007P06Rik	6.79247e-10	0.111093	0.296	0.12	1.14562e-05
Lsm12	9.41685e-09	0.110265	0.337	0.153	0.000157403
BC003331	8.84569e-08	0.110218	0.42	0.217	0.0014637
Gas6	4.78551e-07	0.110173	0.366	0.187	0.00784776
Mrpl20	1.48251e-06	0.109974	0.597	0.35	0.0240968
Adgra1	1.05811e-06	0.10984	0.547	0.315	0.0172525
Slc27a4	2.92169e-06	0.109828	0.486	0.278	0.0471853
Pfdn4	5.26975e-07	0.109713	0.551	0.31	0.00863818
2810001G20Rik	3.42549e-08	0.109685	0.362	0.173	0.000569555
Mrps36	6.84217e-07	0.109607	0.461	0.248	0.0111958
Gprin3	2.38671e-08	0.109577	0.325	0.15	0.00039753
Hs3st4	1.34051e-07	0.109564	0.23	0.098	0.00221386
Cep83	8.18112e-09	0.109522	0.267	0.111	0.000136821
Nampt	2.97734e-07	0.109368	0.354	0.178	0.00489772
Ddx1	1.72324e-06	0.109115	0.469	0.258	0.0279647
Lrrtm4	3.10109e-07	0.108959	0.276	0.13	0.00509819
Rplp1	1.85832e-06	0.108844	1	0.998	0.0301233
Copb2	5.2623e-09	0.108701	0.28	0.118	8.81173e-05
Sema4a	7.52807e-08	0.107961	0.44	0.225	0.00124672
Oat	1.50466e-07	0.107772	0.416	0.213	0.0024833
Vps13b	1.10799e-07	0.107747	0.346	0.167	0.00183106
Ctps	5.13863e-09	0.107718	0.379	0.175	8.60617e-05
Borcs5	8.40438e-08	0.107295	0.313	0.146	0.00139109
Nemf	1.43141e-08	0.107114	0.502	0.255	0.000238802
Rgs7	3.283e-07	0.106948	0.436	0.229	0.00539561
Cul3	6.91348e-07	0.106763	0.617	0.354	0.0113091
Fahd1	6.93213e-08	0.106728	0.173	0.063	0.00114824
Slc35a2	6.66344e-10	0.106578	0.333	0.139	1.12392e-05
Nipsnap1	2.0777e-08	0.10655	0.502	0.257	0.000346207
Cdc5l	1.58126e-08	0.106376	0.313	0.14	0.000263692
Ostm1	2.53567e-06	0.106239	0.354	0.188	0.0409916
Mgat5b	2.36631e-09	0.105959	0.272	0.108	3.97658e-05
Fam107a	1.64222e-08	0.105333	0.333	0.153	0.000273808
Bcap29	2.68649e-07	0.105187	0.51	0.276	0.00442304
Taf9b	2.2644e-08	0.104783	0.288	0.126	0.000377226
Lrtm2	1.56453e-08	0.104635	0.391	0.186	0.000260933
Snx2	4.90399e-07	0.104508	0.399	0.209	0.00804008
Ap3s1	2.81721e-06	0.104284	0.646	0.388	0.0455064
Cnksr2	3.90637e-07	0.104102	0.305	0.147	0.00641465
Slc22a23	2.91615e-09	0.104098	0.263	0.105	4.89534e-05
Htatsf1	4.11197e-07	0.103885	0.379	0.194	0.00674979
Bnip3	2.62064e-07	0.103452	0.457	0.241	0.00431514
Tsr1	2.10527e-08	0.103385	0.235	0.094	0.000350781
Tmem135	3.95964e-09	0.103172	0.449	0.214	6.63992e-05
Zdhhc8	6.31494e-08	0.103132	0.49	0.254	0.0010467
Nefh	1.85029e-09	0.102633	0.354	0.155	3.11256e-05
Xkr4	1.50882e-10	0.102613	0.165	0.046	2.55338e-06
Rwdd2a	4.15278e-07	0.10255	0.42	0.222	0.00681637
Pcdh8	5.71719e-09	0.102411	0.329	0.146	9.57e-05
Pip4k2a	3.76358e-07	0.102154	0.354	0.178	0.00618167
Wscd1	4.19218e-07	0.101767	0.28	0.133	0.00687978
Hspb11	3.11571e-08	0.101722	0.354	0.166	0.000518361
Sort1	6.22298e-07	0.101214	0.453	0.241	0.0101876
Tekt5	6.73244e-09	0.101151	0.202	0.073	0.00011264
Ubap1	1.62268e-08	0.101107	0.3	0.131	0.000270581
Gpr158	3.40604e-08	0.100895	0.449	0.225	0.00056639
Slc7a3	1.53517e-06	0.100776	0.251	0.119	0.0249404
Fam69a	1.23858e-06	0.100762	0.226	0.103	0.0201728
Ufm1	7.14268e-10	0.100621	0.337	0.142	1.2044e-05
Kit	1.66476e-08	0.100444	0.14	0.042	0.000277549
Med14	2.99709e-06	0.100443	0.37	0.202	0.048382
Gm2721	1.94486e-10	0.100326	0.132	0.032	3.28914e-06
Rcn1	1.14588e-06	0.100236	0.486	0.276	0.0186732
Sec22a	2.5267e-06	0.100157	0.239	0.115	0.0408491
2310057M21Rik	4.08555e-10	0.10009	0.313	0.127	6.89845e-06
Prdx1	4.4849e-07	0.100029	0.609	0.343	0.00735883

## Sheet: male_branch2
	p_val	avg_logFC	pct.1	pct.2	p_val_adjust
mt-Co2	2.22576e-112	0.733087	1	0.992	3.8599e-108
mt-Atp6	1.06903e-111	0.719566	1	0.999	1.85381e-107
Pgr	1.18357e-57	0.623732	0.809	0.302	2.0516e-53
mt-Nd4	3.19364e-83	0.559421	1	0.996	5.53777e-79
Zbtb20	8.31056e-43	0.552444	0.99	0.885	1.4403e-38
Parm1	2.46169e-38	0.532462	0.634	0.244	4.26537e-34
mt-Nd1	1.79757e-81	0.518372	1	0.999	3.11681e-77
mt-Nd2	1.0559e-69	0.510962	1	0.977	1.83062e-65
Ctnna2	4.14683e-41	0.502259	0.828	0.402	7.18605e-37
Ptp4a1	2.81707e-36	0.495154	0.927	0.568	4.8803e-32
Prkce	4.48037e-31	0.493857	0.86	0.612	7.75866e-27
Tmem35a	7.93285e-22	0.486327	0.627	0.36	1.37024e-17
Nos1	2.45236e-19	0.479786	0.586	0.316	4.23277e-15
Id4	2.88444e-25	0.479523	0.818	0.505	4.98748e-21
Grik1	2.40877e-30	0.470924	0.694	0.323	4.17006e-26
Pcp4	5.16441e-22	0.467505	0.997	0.958	8.92099e-18
Fstl5	1.97201e-30	0.463954	0.885	0.562	3.41413e-26
Rpl22l1	2.90921e-57	0.452745	1	0.988	5.04253e-53
Rpl12	3.19611e-46	0.445162	0.997	0.952	5.53949e-42
Gda	6.92195e-25	0.438162	0.831	0.478	1.19681e-20
Tpt1	2.3306e-38	0.4303	0.971	0.833	4.03846e-34
Olfm3	1.16682e-28	0.430297	0.768	0.4	2.0193e-24
Irs4	6.76718e-28	0.425885	0.978	0.827	1.17072e-23
Rps24	3.64632e-58	0.425149	1	0.995	6.32126e-54
mt-Nd3	3.0338e-37	0.422805	0.994	0.797	5.25636e-33
Nrip1	1.08335e-31	0.419392	0.548	0.21	1.87626e-27
Fgfr1	7.9112e-15	0.417471	0.634	0.372	1.36255e-10
Tmcc3	5.99297e-26	0.402074	0.895	0.59	1.03642e-21
mt-Co3	1.26793e-70	0.401481	1	1	2.19833e-66
Eif1b	2.21653e-31	0.394442	0.975	0.794	3.83859e-27
mt-Cytb	8.68702e-58	0.390081	1	0.999	1.5059e-53
Pdzrn4	3.05194e-21	0.387718	0.771	0.474	5.2707e-17
Unc5d	1.13901e-16	0.379018	0.828	0.584	1.96434e-12
Plcb4	8.44834e-21	0.371847	0.736	0.418	1.45869e-16
Apoc3	8.89528e-30	0.364253	0.551	0.198	1.53977e-25
Hpcal1	7.77661e-24	0.360731	0.949	0.688	1.34403e-19
mt-Nd5	6.50636e-28	0.356411	0.952	0.728	1.12573e-23
Eif4g2	6.31795e-28	0.354016	0.994	0.853	1.0932e-23
Rpl39	4.40123e-36	0.353139	0.997	0.962	7.62425e-32
Npm1	3.78509e-28	0.350476	0.987	0.883	6.54972e-24
Rbms3	4.02818e-15	0.347701	0.503	0.264	6.94016e-11
Eef1b2	1.82504e-24	0.344201	0.971	0.778	3.15476e-20
Syt6	7.36934e-23	0.334284	0.478	0.19	1.2732e-18
Nexmif	1.99123e-20	0.332888	0.65	0.331	3.43727e-16
Pak3	2.31022e-25	0.331504	0.987	0.888	3.99484e-21
1500009L16Rik	7.83718e-16	0.322798	0.806	0.521	1.35121e-11
Kcnq1ot1	1.43291e-20	0.321919	0.971	0.765	2.47363e-16
Rpl23	6.18702e-42	0.32061	1	0.995	1.07221e-37
Tcaf1	8.87386e-21	0.316669	0.901	0.627	1.53207e-16
Dlgap1	1.55583e-17	0.311626	0.717	0.4	2.68381e-13
Rps10	3.70156e-29	0.311511	0.997	0.971	6.40704e-25
Prkacb	1.05743e-24	0.308375	0.994	0.94	1.82819e-20
Galnt13	1.24283e-18	0.306537	0.551	0.26	2.14488e-14
Sytl4	8.882e-29	0.30088	0.182	0.019	1.53721e-24
Greb1	1.32702e-36	0.295351	0.28	0.041	2.29907e-32
Rps12	6.40824e-29	0.293058	0.997	0.977	1.10914e-24
Rpl30	4.4358e-30	0.292648	0.994	0.969	7.67881e-26
Napb	2.07971e-07	0.291155	0.965	0.839	0.00352324
Phactr1	1.13429e-15	0.290981	0.653	0.377	1.95529e-11
Rps3a1	5.06708e-36	0.289713	1	0.996	8.77719e-32
Rps4x	1.28361e-30	0.287941	1	0.995	2.22257e-26
Nrp1	1.34511e-17	0.285334	0.478	0.216	2.32046e-13
Rps20	1.71005e-24	0.28504	0.994	0.975	2.95616e-20
Uqcrb	3.18989e-15	0.281694	0.729	0.436	5.49619e-11
Prlr	3.08966e-13	0.280052	0.908	0.696	5.3139e-09
Shisa2	2.108e-22	0.278534	0.252	0.06	3.64156e-18
Cntnap2	5.1772e-14	0.278361	0.882	0.661	8.91048e-10
Zmat4	2.00517e-12	0.277851	0.478	0.267	3.44529e-08
Rmst	5.61238e-12	0.275517	0.72	0.479	9.63869e-08
Hs3st5	6.04377e-18	0.272115	0.51	0.232	1.04273e-13
Rps15a	2.43323e-28	0.270353	1	0.988	4.2107e-24
Rasgrf2	2.30776e-10	0.26672	0.742	0.546	3.9525e-06
Rps2	1.51641e-24	0.266658	1	0.99	2.62156e-20
Spon1	7.90958e-10	0.266248	0.376	0.203	1.35309e-05
Gm16485	6.37951e-27	0.264504	0.303	0.071	1.10346e-22
AW551984	2.96203e-15	0.264169	0.924	0.723	5.10418e-11
Brinp2	1.14617e-15	0.261417	0.618	0.325	1.97566e-11
Rpl18	5.4863e-18	0.26085	0.99	0.918	9.46607e-14
Lrp1b	1.74318e-11	0.259378	0.898	0.688	2.99147e-07
Rps27rt	4.73424e-15	0.257364	0.889	0.604	8.15568e-11
Rpl17	1.2258e-30	0.255874	1	0.998	2.1226e-26
Chst11	3.64956e-20	0.254604	0.427	0.165	6.2995e-16
Chpt1	2.14779e-14	0.253671	0.436	0.207	3.69699e-10
Psd3	4.9403e-12	0.252779	0.71	0.464	8.48547e-08
Rpl21	6.0758e-33	0.252459	1	0.996	1.05233e-28
Rpl7	2.77839e-15	0.250452	0.99	0.962	4.78827e-11
Ctnnb1	3.66557e-11	0.248442	0.818	0.574	6.28829e-07
Sccpdh	1.12796e-13	0.248358	0.669	0.401	1.94078e-09
Eef1a1	6.64291e-28	0.246961	1	0.998	1.14929e-23
Gm9493	5.60343e-21	0.246761	0.42	0.155	9.676e-17
Maged1	1.67399e-13	0.246104	0.955	0.825	2.88011e-09
Map2	1.19068e-14	0.244683	0.978	0.822	2.05011e-10
Smim10l1	2.82796e-11	0.244123	0.917	0.693	4.85222e-07
mt-Nd4l	1.9465e-14	0.242879	0.834	0.549	3.35071e-10
Syndig1l	1.67272e-18	0.239383	0.303	0.099	2.88644e-14
Phyhipl	3.23398e-13	0.237893	0.615	0.347	5.5618e-09
Enpp2	1.19112e-10	0.237007	0.28	0.125	2.04135e-06
Slitrk6	5.18437e-23	0.23664	0.226	0.047	8.95807e-19
Stk19	3.08258e-13	0.234997	0.554	0.296	5.30204e-09
Pcdh7	6.80722e-09	0.233096	0.857	0.699	0.000116118
Snhg12	2.16792e-09	0.232896	0.818	0.562	3.70433e-05
Rplp2	7.31322e-21	0.229753	0.997	0.991	1.26277e-16
Spock3	6.1449e-07	0.227547	0.697	0.521	0.0103671
Drp2	4.85519e-16	0.227239	0.452	0.203	8.37131e-12
Htr1b	3.34663e-10	0.226482	0.392	0.203	5.73011e-06
Chodl	3.10223e-11	0.225142	0.389	0.191	5.32219e-07
Minos1	9.70404e-12	0.222142	0.911	0.708	1.66599e-07
Rpl7a	7.72819e-14	0.220967	0.99	0.929	1.33002e-09
Rps6ka6	3.81983e-16	0.220941	0.35	0.136	6.58653e-12
Rbbp7	8.7735e-12	0.220626	0.589	0.323	1.50641e-07
Clmp	1.35461e-12	0.218478	0.541	0.288	2.32803e-08
Rpl26	4.68617e-27	0.217737	1	0.999	8.10613e-23
Rpl31	6.09378e-23	0.216714	1	0.993	1.05288e-18
2010107E04Rik	5.57649e-10	0.215126	0.774	0.524	9.5436e-06
Rpl23a	3.22687e-23	0.215099	1	0.997	5.57604e-19
Kcnd2	2.65286e-09	0.215025	0.646	0.429	4.53215e-05
Khdrbs1	1.3303e-10	0.214531	0.682	0.429	2.2796e-06
Hmgcs1	3.99981e-08	0.213896	0.768	0.542	0.000680047
Rpl29	8.65082e-16	0.213468	0.997	0.962	1.4914e-11
Rps27a	1.76147e-22	0.213384	1	0.998	3.04312e-18
Gnai1	1.25939e-11	0.212895	0.723	0.459	2.16187e-07
Ddhd1	3.01861e-08	0.212616	0.475	0.297	0.000513496
Pts	2.67188e-15	0.210873	0.35	0.14	4.60498e-11
Kcnj3	3.24496e-13	0.20914	0.51	0.25	5.58035e-09
Cdkl2	1.29291e-09	0.208345	0.599	0.372	2.21023e-05
Astn1	6.1389e-09	0.208092	0.92	0.719	0.000104748
Plxnc1	6.64557e-10	0.207521	0.646	0.42	1.13712e-05
Rplp1	1.50383e-21	0.20714	1	0.998	2.59741e-17
Nop56	1.21939e-09	0.206062	0.72	0.45	2.08478e-05
Actg1	1.39791e-11	0.205858	0.997	0.871	2.39937e-07
Rps7	3.23829e-21	0.205744	0.997	0.995	5.59221e-17
Rps25	1.20507e-20	0.205583	1	0.995	2.08043e-16
Sez6l	1.20557e-08	0.204827	0.908	0.751	0.000205441
Il1rap	6.12876e-15	0.202602	0.408	0.176	1.05568e-10
Rpl5	4.46522e-13	0.201763	0.971	0.865	7.67749e-09
Gm10073	1.34216e-17	0.20172	0.363	0.135	2.3155e-13
Trp53i11	1.30734e-09	0.200681	0.424	0.229	2.23477e-05
Eif1a	1.23473e-10	0.200607	0.608	0.352	2.11595e-06
Arhgef9	3.92063e-09	0.200428	0.764	0.545	6.69369e-05
Ankrd46	5.23495e-08	0.200402	0.701	0.494	0.000889628
Nudt4	8.90592e-15	0.199858	0.503	0.232	1.5336e-10
Selenof	1.70924e-11	0.199727	0.685	0.41	2.93341e-07
Rpl22	3.6549e-10	0.199643	0.914	0.721	6.25718e-06
Scml4	6.74312e-12	0.198588	0.36	0.165	1.15793e-07
Tmsb4x	1.30807e-12	0.198069	1	0.991	2.24817e-08
Cdkl5	8.57669e-10	0.197954	0.589	0.349	1.46713e-05
Tcp1	3.52526e-09	0.196527	0.857	0.633	6.02043e-05
Rps17	3.46044e-16	0.196029	1	0.992	5.96719e-12
Cstf2	1.37268e-10	0.195451	0.576	0.326	2.35209e-06
5330434G04Rik	6.6776e-09	0.195282	0.748	0.52	0.000113913
Rack1	3.04196e-08	0.192967	0.885	0.693	0.000517437
Tgfb2	3.03211e-15	0.191502	0.169	0.04	5.22463e-11
Efemp1	4.69232e-26	0.191326	0.131	0.007	8.11537e-22
Map2k1	1.01875e-08	0.190371	0.815	0.591	0.000173656
Plxna2	1.31069e-09	0.189849	0.643	0.395	2.24037e-05
Pitpnc1	7.65717e-09	0.189104	0.611	0.374	0.000130593
Ogt	8.83987e-08	0.188617	0.943	0.816	0.00150074
Dgkb	6.95323e-08	0.187361	0.717	0.498	0.00118094
Park2	3.74106e-12	0.187243	0.347	0.155	6.4264e-08
Ppp3ca	5.89096e-08	0.186134	0.978	0.895	0.00100093
Lcorl	7.4934e-11	0.185809	0.369	0.177	1.28489e-06
Maf	4.70505e-15	0.185325	0.201	0.055	8.10586e-11
Wnt4	2.5891e-08	0.184814	0.274	0.138	0.000440535
Gfra1	6.24238e-10	0.184667	0.475	0.266	1.0682e-05
Unc80	3.23643e-09	0.184608	0.898	0.675	5.52782e-05
Mrap2	2.52616e-06	0.184575	0.465	0.31	0.0424017
Syne2	2.27856e-10	0.184234	0.303	0.136	3.90272e-06
Ccdc85a	6.43305e-13	0.183292	0.503	0.25	1.10591e-08
Idnk	1.12778e-10	0.183042	0.443	0.231	1.93302e-06
Tbca	1.16485e-09	0.182729	0.92	0.76	1.99165e-05
Rpl27a	2.89479e-17	0.182541	1	0.998	4.99264e-13
Lamp5	2.10105e-13	0.182478	0.322	0.129	3.61464e-09
Snn	1.13746e-08	0.182377	0.596	0.364	0.000193846
mt-Co1	3.20999e-27	0.18184	1	1	5.55295e-23
Plcxd3	1.49316e-12	0.181479	0.5	0.254	2.56585e-08
Abat	8.08918e-09	0.180423	0.914	0.722	0.000137937
Slitrk1	1.05563e-09	0.180299	0.624	0.391	1.80512e-05
Cartpt	1.8784e-07	0.180168	0.201	0.092	0.00318313
Tnxb	5.26944e-24	0.180038	0.156	0.017	9.1077e-20
Esr1	1.77781e-10	0.178622	0.697	0.434	3.04556e-06
Wdr89	2.48577e-10	0.178602	0.567	0.315	4.25714e-06
Epm2a	2.99706e-13	0.177906	0.385	0.172	5.15525e-09
Ube2v2	3.4278e-08	0.17783	0.701	0.466	0.000582931
Gdi2	1.73897e-08	0.177475	0.806	0.569	0.000296163
R3hdm1	1.86779e-07	0.176454	0.812	0.608	0.00316534
Ipo5	1.14728e-09	0.174826	0.589	0.349	1.96174e-05
Sipa1l1	4.35247e-10	0.174697	0.545	0.307	7.45056e-06
Rps13	4.84152e-13	0.174178	0.997	0.982	8.32402e-09
Tiparp	3.101e-18	0.173906	0.242	0.065	5.35078e-14
Eif4g3	2.90126e-07	0.17347	0.774	0.562	0.00491241
Mast4	6.33663e-09	0.173225	0.608	0.378	0.000108103
Mettl9	4.733e-08	0.172994	0.621	0.385	0.000804421
Rplp0	3.32256e-07	0.1726	0.971	0.871	0.00562145
Pard3	1.9184e-12	0.17223	0.427	0.202	3.29639e-08
Hsp90b1	1.98901e-07	0.171956	0.79	0.612	0.00336998
Nap1l1	8.29353e-07	0.171452	0.911	0.71	0.0139746
Whrn	8.99044e-10	0.170673	0.271	0.12	1.53763e-05
A830018L16Rik	9.27413e-12	0.170548	0.411	0.196	1.59228e-07
Ggct	2.80026e-15	0.170288	0.315	0.116	4.82568e-11
Kif5b	1.99889e-08	0.170144	0.892	0.648	0.000340331
Dcp2	2.98964e-09	0.169882	0.532	0.304	5.1069e-05
Shisa6	2.40023e-16	0.169221	0.185	0.044	4.13919e-12
Mrpl42	7.31592e-11	0.168719	0.586	0.328	1.25453e-06
Cckar	6.12441e-11	0.168477	0.223	0.086	1.0504e-06
Hsbp1	2.17582e-08	0.168267	0.908	0.695	0.000370324
Pdha1	3.13026e-08	0.167252	0.567	0.341	0.000532394
Smap1	1.03917e-08	0.167177	0.51	0.303	0.000177116
Rpl9-ps6	4.19563e-13	0.167045	0.379	0.165	7.21438e-09
Cfap36	2.19247e-12	0.166978	0.532	0.268	3.76666e-08
Stk39	2.31887e-13	0.166285	0.42	0.189	3.98892e-09
Ezr	1.70496e-14	0.165454	0.182	0.048	2.93525e-10
Ola1	2.93001e-10	0.164376	0.535	0.291	5.01734e-06
Stim2	9.98013e-13	0.164246	0.389	0.175	1.71558e-08
Ildr2	1.79581e-08	0.163289	0.605	0.375	0.000305827
Serinc1	6.8861e-08	0.162467	0.997	0.9	0.00116967
Rpl10a	6.08926e-11	0.162085	0.994	0.978	1.04443e-06
Pik3r3	1.66532e-08	0.162031	0.357	0.187	0.000283638
Polr1d	7.88157e-07	0.161854	0.796	0.589	0.013282
Hspa5	1.86561e-06	0.161331	0.669	0.454	0.0313423
Hspa8	2.2758e-08	0.160655	0.981	0.938	0.000387273
Cacna2d1	1.50633e-07	0.159686	0.452	0.271	0.00255488
Gabra3	1.80066e-07	0.158861	0.713	0.462	0.00305247
Ssr3	4.64988e-07	0.158082	0.748	0.503	0.00785504
Myh10	3.78371e-08	0.158048	0.717	0.465	0.000643382
Rpl8	5.93766e-13	0.157454	1	0.999	1.0208e-08
Rtraf	1.69523e-07	0.156105	0.86	0.675	0.00287427
Rps15	8.26777e-14	0.155275	1	0.999	1.4228e-09
Rps16	5.61428e-15	0.155043	1	0.995	9.67115e-11
Rps6	1.53759e-11	0.154756	1	0.999	2.63897e-07
Polr3k	6.32506e-09	0.154399	0.436	0.243	0.000107912
Fgf12	9.64618e-09	0.153613	0.538	0.313	0.000164448
Idh1	1.25372e-08	0.153583	0.414	0.229	0.000213635
Scoc	1.28755e-06	0.15339	0.939	0.777	0.0216669
Meg3	1.43864e-14	0.152817	0.994	1	2.47691e-10
Crk	6.27029e-08	0.152636	0.653	0.405	0.00106526
Rps8	8.87636e-16	0.152095	1	0.998	1.5302e-11
Idi1	7.02456e-09	0.151993	0.299	0.146	0.000119818
Unc5b	2.34952e-11	0.150954	0.204	0.071	4.03154e-07
Stx7	7.48984e-07	0.150705	0.764	0.575	0.0126249
Fam183b	8.50079e-15	0.150489	0.376	0.149	1.46401e-10
Trp53inp1	7.91592e-11	0.150476	0.223	0.084	1.35726e-06
Abca1	1.84219e-10	0.150167	0.121	0.031	3.15567e-06
Rpl9	6.62149e-15	0.150106	1	0.999	1.14048e-10
Ankib1	1.05363e-09	0.149758	0.404	0.208	1.80182e-05
Lrrfip2	6.21365e-09	0.149425	0.401	0.213	0.000106017
Ret	1.86811e-09	0.149334	0.242	0.103	3.1926e-05
Dock4	2.82603e-08	0.148683	0.363	0.196	0.000480821
Nedd4	1.89945e-07	0.147752	0.955	0.829	0.00321862
Slitrk5	6.73781e-07	0.147216	0.583	0.376	0.011364
Pgrmc1	1.38933e-06	0.147082	0.981	0.84	0.0233686
Map1a	1.49918e-06	0.146157	0.818	0.601	0.0252102
Rpl19	1.37124e-11	0.145971	1	0.999	2.35373e-07
Neto2	2.50467e-07	0.145901	0.331	0.183	0.00424241
Tmem26	4.67753e-11	0.145592	0.175	0.057	8.02337e-07
Bmp3	3.9555e-07	0.145527	0.143	0.056	0.00668796
Socs2	4.36461e-09	0.145499	0.188	0.071	7.45083e-05
Serinc5	1.19769e-11	0.145117	0.239	0.089	2.05607e-07
Slitrk2	7.78667e-10	0.143966	0.417	0.21	1.33214e-05
Mal2	5.21921e-07	0.143016	0.487	0.301	0.0088116
Rpl15	1.91123e-08	0.142663	1	0.98	0.000325425
Mblac2	8.97223e-09	0.142566	0.64	0.37	0.000152977
Scg2	1.4504e-07	0.142476	1	0.964	0.00246018
Sema5a	4.45168e-08	0.142094	0.258	0.123	0.000756651
Rpl13	1.73424e-14	0.14209	1	0.998	2.9855e-10
Cct4	7.15778e-08	0.141402	0.618	0.383	0.00121561
H2-Q2	4.07366e-12	0.141369	0.248	0.092	6.99733e-08
Ywhah	6.71905e-08	0.141331	0.997	0.956	0.00114137
Znrf2	1.63362e-10	0.14123	0.296	0.129	2.79889e-06
Chml	3.83308e-09	0.141168	0.213	0.089	6.54498e-05
Cap2	7.78614e-10	0.141058	0.484	0.259	1.33213e-05
Tmem50b	7.97747e-07	0.141016	0.589	0.381	0.0134428
Rpl35a	1.45989e-12	0.14073	1	0.999	2.50882e-08
Ralgps2	4.62712e-07	0.140352	0.513	0.303	0.00781706
Cacybp	8.70258e-08	0.140263	0.592	0.364	0.00147752
Ikzf2	1.35989e-07	0.139844	0.255	0.125	0.00230719
Rps9	2.78222e-09	0.139436	1	0.992	4.75287e-05
Nxn	2.18222e-11	0.139305	0.175	0.055	3.7447e-07
Vps35	1.17569e-07	0.139222	0.646	0.405	0.00199527
Zcchc18	1.20961e-06	0.138467	0.971	0.892	0.0203602
Eef1g	5.45077e-10	0.138081	1	0.987	9.32899e-06
Ppia	3.02565e-07	0.137692	0.978	0.883	0.00512153
Pgk1	1.25792e-06	0.136047	0.621	0.401	0.0211708
Pdia3	1.64499e-08	0.135522	0.513	0.291	0.000280191
Adarb2	3.98883e-07	0.13548	0.446	0.262	0.00674351
Mindy3	8.45615e-11	0.135316	0.35	0.163	1.44972e-06
Mllt11	2.50778e-06	0.135153	0.978	0.85	0.0420981
Large1	5.70144e-09	0.134894	0.449	0.239	9.72951e-05
Camta1	1.36779e-07	0.134321	0.971	0.897	0.00232045
Nrsn1	8.67098e-07	0.13415	0.984	0.944	0.0146063
Fut9	6.00229e-07	0.134006	0.637	0.413	0.0101289
Flrt2	1.02925e-08	0.13379	0.392	0.203	0.000175436
Rpf2	3.19829e-09	0.133094	0.21	0.087	5.46299e-05
Polr2k	1.26753e-08	0.132749	0.586	0.339	0.000215974
Rybp	4.24873e-08	0.132733	0.599	0.365	0.000722284
Sptbn1	2.0693e-06	0.132124	0.936	0.792	0.0347518
Lamb3	9.17489e-15	0.131577	0.169	0.041	1.57982e-10
Nipsnap3b	6.01803e-10	0.131313	0.21	0.08	1.02987e-05
Ssb	1.41842e-07	0.130856	0.666	0.433	0.00240621
Sacs	1.3957e-09	0.130555	0.312	0.146	2.38552e-05
Rab40b	1.14011e-10	0.130461	0.223	0.083	1.95403e-06
Rps3	3.76685e-10	0.129363	1	0.995	6.44847e-06
Vldlr	1.28587e-07	0.129283	0.417	0.236	0.00218186
Gpbp1	1.16953e-07	0.129038	0.621	0.372	0.00198493
Csgalnact1	1.25048e-15	0.128368	0.127	0.021	2.15533e-11
Bhlhb9	3.07528e-08	0.128345	0.376	0.199	0.000523075
Nyap2	1.02941e-10	0.128035	0.309	0.135	1.76461e-06
Cops2	1.96269e-06	0.126707	0.627	0.403	0.0329692
Hspd1	1.28861e-06	0.126531	0.669	0.426	0.0216834
Mrpl33	7.90622e-08	0.126514	0.621	0.373	0.00134256
Frmd5	2.78206e-10	0.126284	0.229	0.09	4.76427e-06
Galnt14	2.09279e-09	0.126193	0.255	0.11	3.57616e-05
Fktn	1.99392e-07	0.12597	0.465	0.271	0.0033781
Eloc	5.33768e-07	0.125737	0.701	0.439	0.00901
Cetn2	3.74458e-07	0.125229	0.392	0.223	0.00633208
Chtop	2.31693e-06	0.12491	0.637	0.42	0.038899
Nap1l3	8.5737e-07	0.124572	0.599	0.382	0.0144433
Gm10076	1.25822e-12	0.124506	0.86	0.552	2.16263e-08
Vps13a	3.16409e-07	0.123994	0.471	0.279	0.00535459
Ddc	2.21477e-08	0.123993	0.299	0.146	0.000376931
Snrpe	1.3433e-06	0.123944	0.669	0.439	0.0225983
Zhx1	6.2903e-08	0.123417	0.404	0.224	0.0010686
Rpl14	1.41396e-08	0.123144	1	0.999	0.000240869
Ube2e1	2.78731e-06	0.123125	0.666	0.447	0.0467683
Lrrn3	4.35241e-07	0.122639	0.532	0.323	0.00735644
Dock10	4.6844e-10	0.122512	0.217	0.084	8.01829e-06
Rps14	1.04087e-09	0.122313	1	1	1.7801e-05
Zfp120	9.64983e-11	0.121822	0.268	0.109	1.65427e-06
Mgat5	4.62442e-07	0.121359	0.535	0.318	0.00781342
Sqle	3.35566e-09	0.121293	0.341	0.165	5.73113e-05
March1	2.55745e-06	0.12115	0.43	0.263	0.0429243
Irs2	1.52384e-07	0.120945	0.475	0.275	0.00258444
Fam161b	5.80329e-09	0.120849	0.22	0.091	9.90274e-05
Rpl36a-ps1	7.30998e-11	0.119655	0.242	0.094	1.25359e-06
Arl6	8.69941e-08	0.119608	0.35	0.184	0.00147707
Pnrc1	2.00942e-09	0.119302	0.379	0.185	3.4339e-05
Fbn2	9.71876e-14	0.119067	0.178	0.048	1.67231e-09
Mcts1	8.76742e-10	0.118919	0.401	0.197	1.49958e-05
Gpd2	2.03032e-06	0.118429	0.535	0.34	0.0340992
Rev3l	3.63816e-07	0.118087	0.494	0.295	0.00615322
Lhfpl3	3.15026e-07	0.117979	0.354	0.194	0.00533181
Ppid	1.15298e-07	0.117556	0.414	0.229	0.00195707
Rpl32	2.58223e-07	0.117171	1	0.999	0.004373
Clvs1	3.52514e-07	0.11699	0.347	0.192	0.00596278
Cnot7	2.13794e-07	0.116837	0.682	0.42	0.00362166
Igf1r	6.72525e-07	0.116522	0.417	0.241	0.0113435
Itm2c	6.74661e-07	0.116415	0.997	0.971	0.0113782
Dld	4.42953e-07	0.116386	0.395	0.226	0.00748546
Rapgef4	5.19509e-07	0.11625	0.36	0.2	0.00877139
Mrfap1	7.05776e-07	0.115994	0.997	0.958	0.0119008
Rps12-ps3	8.59957e-10	0.115452	0.146	0.046	1.47096e-05
Sdhaf4	3.71077e-09	0.115279	0.385	0.191	6.3365e-05
Rps11	8.87203e-08	0.115083	0.997	0.995	0.00150612
Ppp1r17	1.08001e-07	0.115079	0.328	0.168	0.00183332
Sphkap	1.80774e-07	0.115032	0.468	0.27	0.00306431
Diaph3	4.27182e-08	0.114737	0.213	0.093	0.000726166
Sptssa	2.9814e-07	0.114423	0.586	0.354	0.00504691
Arxes1	7.186e-08	0.112896	0.455	0.256	0.00122033
Ncbp2	1.65396e-06	0.112646	0.497	0.302	0.0277948
Mfng	3.15412e-07	0.112606	0.153	0.061	0.00533803
Rps23	7.05187e-10	0.112363	1	1	1.20657e-05
Vps50	1.94457e-06	0.111968	0.439	0.261	0.0326668
Efcab1	6.94183e-08	0.111937	0.255	0.119	0.00117907
Insm2	1.17238e-06	0.111676	0.169	0.073	0.0197346
Hprt	1.26427e-06	0.111332	0.761	0.495	0.0212763
Rpl34	1.3696e-08	0.111305	1	0.999	0.000233325
Fam92a	1.35009e-06	0.110724	0.462	0.275	0.0227112
Col4a3bp	4.43824e-07	0.110717	0.459	0.264	0.00749973
Dhx40	5.57765e-09	0.110674	0.255	0.11	9.51882e-05
Fam163b	6.664e-07	0.110633	0.312	0.165	0.0112408
B4gat1	8.39545e-07	0.110304	0.439	0.258	0.0141438
Zc3h14	2.9409e-07	0.110176	0.439	0.252	0.00497924
Etfbkmt	1.16686e-12	0.109866	0.146	0.036	2.00571e-08
Cep19	6.06037e-07	0.108964	0.529	0.315	0.0102257
Pstk	1.60281e-06	0.107775	0.427	0.256	0.0269432
BC003331	3.6657e-07	0.107605	0.389	0.217	0.00619942
Tmem167	7.32003e-07	0.107435	0.503	0.306	0.0123408
Fam78b	4.78243e-09	0.10705	0.268	0.118	8.16313e-05
Frmd4a	1.52219e-06	0.106741	0.58	0.356	0.0255927
Klhl12	9.9487e-07	0.106607	0.318	0.174	0.0167526
Acvr2a	3.31431e-07	0.106307	0.331	0.176	0.00560782
Specc1	1.90936e-07	0.106179	0.379	0.206	0.00323521
Bnip3	7.21239e-07	0.10611	0.414	0.241	0.0121601
Nap1l2	1.24806e-07	0.105897	0.478	0.275	0.00211796
Erich3	6.97797e-07	0.10557	0.341	0.185	0.011767
Cdh4	2.34809e-08	0.104831	0.334	0.167	0.00039955
Zfp638	1.44934e-06	0.10465	0.535	0.325	0.0243735
Plp1	2.36289e-06	0.104545	0.592	0.381	0.0396682
Lrrc55	4.81233e-10	0.104405	0.268	0.113	8.23679e-06
Gfod1	1.8531e-07	0.103737	0.287	0.144	0.00314082
Atxn7l1	2.71312e-07	0.10366	0.309	0.16	0.0045944
Grsf1	7.61982e-07	0.10291	0.545	0.323	0.0128424
Tbc1d30	7.57932e-07	0.102658	0.338	0.183	0.012775
Pde12	1.61634e-08	0.102548	0.201	0.082	0.000275327
Rps21	2.28541e-06	0.102222	1	0.995	0.0383721
Ppa2	8.01878e-08	0.102149	0.229	0.103	0.00136159
Sema6a	9.51225e-09	0.101913	0.427	0.222	0.000162174
Fndc3b	4.36633e-07	0.101342	0.379	0.207	0.00737954
Samd5	3.39958e-07	0.101277	0.433	0.244	0.00575141
Dapk1	7.3913e-07	0.101195	0.538	0.322	0.0124603
Ece2	1.54722e-06	0.100582	0.389	0.22	0.0260118
E130307A14Rik	3.98477e-07	0.1004	0.382	0.21	0.00673705
Zfp62	1.30147e-08	0.100245	0.178	0.068	0.000221732
Rpl6	5.68032e-07	0.100132	1	0.999	0.00958611
Hipk2	1.97909e-06	0.1001	0.331	0.184	0.0332428

## Sheet: male late trajectory
genes	p_val	avg_logFC	pct.1	pct.2	p_val_adjust	type
mt-Co2	3.26213e-175	0.74698	1	0.992	5.73025e-171	shared
mt-Atp6	1.90704e-166	0.694678	1	0.999	3.34971e-162	shared
Nts	1.40977e-31	0.665964	0.544	0.274	2.47034e-27	shared
Pgr	1.55922e-78	0.589992	0.813	0.302	2.73783e-74	shared
mt-Nd4	9.27327e-139	0.589349	1	0.996	1.62876e-134	shared
Napb	3.45419e-42	0.554633	0.98	0.839	6.05969e-38	other
mt-Nd1	2.01367e-137	0.553349	1	0.999	3.5366e-133	shared
mt-Nd2	4.97676e-113	0.521163	1	0.977	8.74018e-109	shared
Pdzrn4	4.99028e-51	0.494015	0.846	0.474	8.75944e-47	shared
mt-Nd3	9.21609e-68	0.468324	0.991	0.797	1.61816e-63	shared
Ptp4a1	4.04384e-45	0.451609	0.903	0.568	7.09572e-41	shared
Id4	5.65811e-38	0.449704	0.84	0.505	9.92093e-34	shared
Tmem35a	1.84076e-38	0.445823	0.702	0.36	3.22777e-34	shared
Prkce	2.86289e-42	0.435004	0.899	0.612	5.02295e-38	shared
Cntnap2	5.54952e-41	0.432093	0.914	0.661	9.73329e-37	other
Ctnna2	4.35718e-42	0.426623	0.772	0.402	7.64336e-38	shared
Parm1	1.67755e-38	0.41955	0.587	0.244	2.94192e-34	shared
Nexmif	1.7354e-40	0.411725	0.707	0.331	3.04355e-36	shared
mt-Cytb	2.01191e-98	0.40912	1	0.999	3.53291e-94	shared
mt-Co3	1.74296e-112	0.401913	1	1	3.06082e-108	other
Pak3	1.792e-54	0.401434	0.991	0.888	3.14568e-50	shared
mt-Nd5	3.3155e-49	0.394773	0.969	0.728	5.81903e-45	other
Grik1	2.01263e-33	0.382672	0.673	0.323	3.52733e-29	other
Fstl5	6.75659e-33	0.380021	0.867	0.562	1.18402e-28	shared
Nrip1	1.74597e-38	0.378702	0.537	0.21	3.06173e-34	shared
Nos1	1.43645e-22	0.375986	0.578	0.316	2.51192e-18	shared
Rpl22l1	4.48893e-65	0.375747	1	0.988	7.88121e-61	shared
Irs4	1.53827e-33	0.371767	0.977	0.827	2.69613e-29	shared
Tpt1	1.98049e-43	0.364319	0.984	0.833	3.47497e-39	shared
Hmgcs1	7.79679e-26	0.358578	0.826	0.542	1.3653e-21	other
Pcp4	1.19223e-19	0.356998	0.996	0.958	2.08222e-15	shared
Kcnq1ot1	3.50019e-36	0.351071	0.984	0.765	6.13619e-32	shared
Ap1s2	1.46369e-13	0.346278	0.573	0.382	2.54127e-09	other
Lamp5	4.18614e-35	0.332557	0.411	0.129	7.33789e-31	male specific
Uqcrb	3.75921e-30	0.33131	0.785	0.436	6.58614e-26	shared
Vsnl1	6.95159e-19	0.325249	0.785	0.581	1.21354e-14	male specific
Sv2c	4.16908e-22	0.325013	0.634	0.369	7.2888e-18	shared
Tcaf1	1.36075e-30	0.314271	0.921	0.627	2.38417e-26	shared
Eif1b	2.61677e-31	0.313986	0.971	0.794	4.5851e-27	shared
Rps24	1.04012e-48	0.313273	1	0.995	1.82542e-44	shared
Fgfr1	2.13931e-18	0.313184	0.639	0.372	3.73374e-14	shared
Camk4	7.21667e-25	0.297792	0.494	0.225	1.26342e-20	male specific
Phyhipl	5.4947e-27	0.296665	0.666	0.347	9.62231e-23	shared
Pcdh7	2.68003e-19	0.294766	0.899	0.699	4.68013e-15	shared
Zmat4	8.44359e-23	0.294584	0.528	0.267	1.47687e-18	shared
mt-Nd4l	4.52442e-30	0.292912	0.882	0.549	7.92588e-26	male specific
Lrp1b	7.4188e-22	0.285705	0.919	0.688	1.29695e-17	shared
Eif4g2	8.72696e-29	0.282552	0.987	0.853	1.5287e-24	shared
Gnai1	1.73128e-21	0.280774	0.747	0.459	3.02611e-17	male specific
Rpl12	3.16639e-27	0.279804	0.998	0.952	5.54561e-23	shared
Ankrd46	4.79571e-20	0.276697	0.768	0.494	8.37763e-16	male specific
2010107E04Rik	1.20924e-21	0.27617	0.81	0.524	2.11387e-17	shared
Psd3	6.873e-21	0.274061	0.745	0.464	1.20106e-16	other
Gfra1	1.08053e-25	0.273686	0.56	0.266	1.89201e-21	shared
Eef1b2	7.10462e-25	0.273649	0.966	0.778	1.24388e-20	shared
Pdha1	1.40023e-23	0.271449	0.655	0.341	2.44983e-19	other
Maged1	4.22013e-24	0.268546	0.964	0.825	7.38606e-20	shared
Khdrbs1	5.70907e-24	0.2648	0.756	0.429	9.99144e-20	other
Chl1	2.38241e-16	0.26473	0.79	0.582	4.15278e-12	other
Unc5d	3.96496e-17	0.263934	0.851	0.584	6.91727e-13	shared
Drp2	3.63491e-27	0.262791	0.485	0.203	6.36582e-23	shared
1500009L16Rik	6.45276e-17	0.260775	0.788	0.521	1.12543e-12	shared
Npm1	7.36088e-24	0.257588	0.984	0.883	1.28815e-19	shared
Adra2a	7.83514e-25	0.256407	0.303	0.098	1.37162e-20	male specific
Ube2v2	2.7805e-20	0.251344	0.767	0.466	4.85809e-16	other
Actg1	1.53493e-22	0.248638	0.995	0.871	2.68397e-18	other
Spock3	3.4823e-13	0.245227	0.745	0.521	6.04353e-09	shared
Scoc	5.04681e-21	0.24512	0.952	0.777	8.81981e-17	other
Greb1	6.81832e-37	0.244138	0.253	0.041	1.19546e-32	other
Gm16485	2.00465e-34	0.242685	0.307	0.071	3.51375e-30	shared
Prkacb	4.19207e-23	0.239874	0.996	0.94	7.33318e-19	other
Tspyl4	1.49638e-21	0.239173	0.971	0.846	2.61567e-17	other
Slc32a1	6.72976e-18	0.238211	0.883	0.63	1.17441e-13	other
Fut9	5.29284e-19	0.23815	0.706	0.413	9.24183e-15	other
Smim10l1	4.16395e-17	0.237443	0.928	0.693	7.26402e-13	other
Idi1	1.15356e-23	0.234779	0.379	0.146	2.01861e-19	other
Hs3st5	3.45215e-20	0.231333	0.488	0.232	6.03125e-16	shared
Hpcal1	7.04318e-15	0.230313	0.887	0.688	1.22587e-10	shared
Rpl39	5.00432e-25	0.229537	0.996	0.962	8.76207e-21	shared
Tmem215	1.69931e-24	0.228813	0.257	0.072	2.97448e-20	male specific
Prlr	1.8344e-14	0.228008	0.89	0.696	3.19057e-10	other
Map1a	5.83042e-18	0.227209	0.86	0.601	1.01752e-13	other
Gad2	1.21376e-15	0.22702	0.971	0.9	2.114e-11	male specific
Zbtb20	1.18686e-06	0.226578	0.925	0.885	0.0197446	shared
Cdh4	1.77484e-24	0.226134	0.422	0.167	3.10651e-20	other
Nefl	2.32186e-15	0.22245	0.67	0.419	4.04236e-11	male specific
Serinc1	3.75861e-20	0.221461	0.996	0.9	6.5663e-16	shared
Syt6	1.82241e-18	0.221347	0.411	0.19	3.18083e-14	shared
5330434G04Rik	1.74638e-16	0.220807	0.797	0.52	3.04447e-12	shared
Ubl3	2.02843e-12	0.220013	0.734	0.505	3.51466e-08	male specific
Abat	4.16492e-16	0.219031	0.928	0.722	7.25862e-12	other
Apoc3	2.50876e-22	0.216866	0.46	0.198	4.38657e-18	shared
Brinp2	4.97167e-19	0.215299	0.612	0.325	8.68153e-15	shared
Scml4	2.6124e-20	0.214785	0.393	0.165	4.56465e-16	shared
Tmem30a	5.79873e-16	0.213205	0.912	0.711	1.01049e-11	other
Dnm3	1.26871e-14	0.212916	0.896	0.668	2.20717e-10	male specific
Nudt4	1.31725e-22	0.21123	0.519	0.232	2.30373e-18	shared
Olfm3	1.313e-13	0.211162	0.641	0.4	2.28002e-09	shared
Mllt11	1.14202e-18	0.211094	0.984	0.85	1.9935e-14	male specific
Pgam1	1.26302e-14	0.210335	0.908	0.697	2.19741e-10	male specific
Slitrk5	1.6185e-15	0.21018	0.643	0.376	2.81846e-11	shared
Gm9493	1.14364e-24	0.209911	0.406	0.155	2.00194e-20	shared
Atp1b3	3.99326e-13	0.209283	0.731	0.481	6.9283e-09	shared
Minos1	2.79625e-15	0.209266	0.903	0.708	4.86771e-11	shared
Phactr1	1.98896e-15	0.209088	0.636	0.377	3.46337e-11	other
mt-Co1	1.03511e-55	0.207371	1	1	1.81714e-51	male specific
Epm2a	1.28608e-23	0.206193	0.429	0.172	2.25026e-19	other
Hsp90b1	2.05718e-13	0.204773	0.808	0.612	3.57147e-09	shared
Ctnnb1	1.01603e-13	0.203109	0.817	0.574	1.76485e-09	other
Aldoc	4.35524e-14	0.203024	0.496	0.278	7.57159e-10	male specific
Chst11	1.26052e-22	0.202472	0.409	0.165	2.20465e-18	shared
Snca	1.19163e-10	0.202411	0.537	0.35	2.05342e-06	male specific
Fut8	3.86548e-17	0.202066	0.573	0.303	6.74411e-13	shared
Ets2	4.6017e-16	0.200643	0.722	0.439	8.01938e-12	shared
Map2	1.06204e-15	0.200493	0.975	0.822	1.85017e-11	shared
Atp2b1	3.85077e-13	0.198591	0.856	0.635	6.68147e-09	male specific
Pappa	2.89566e-22	0.198534	0.192	0.043	5.06278e-18	other
Crim1	1.38596e-10	0.198232	0.715	0.497	2.38746e-06	male specific
Hcn1	1.87106e-12	0.197503	0.54	0.32	3.24255e-08	male specific
Scd2	2.81657e-12	0.196435	0.948	0.794	4.87801e-08	other
Irs2	6.70712e-17	0.195607	0.53	0.275	1.16972e-12	shared
Chpt1	1.41722e-16	0.195161	0.425	0.207	2.47079e-12	shared
Rpl23	1.3876e-22	0.191855	1	0.995	2.42664e-18	shared
Oxct1	2.20243e-12	0.191833	0.679	0.439	3.81571e-08	other
Gpr83	1.12216e-10	0.190845	0.232	0.106	1.93382e-06	male specific
Sez6l	5.25125e-12	0.190356	0.917	0.751	9.08834e-08	shared
Galnt13	2.23566e-15	0.18951	0.496	0.26	3.8925e-11	shared
Ppp3ca	4.92652e-13	0.188408	0.984	0.895	8.54555e-09	male specific
Htr1b	2.12665e-13	0.188376	0.395	0.203	3.69186e-09	shared
Map2k4	1.24334e-12	0.187964	0.88	0.627	2.15545e-08	other
Fgf12	1.32176e-16	0.187706	0.582	0.313	2.30449e-12	other
Hspa5	6.97294e-13	0.187677	0.711	0.454	1.20932e-08	shared
Tmcc3	2.08893e-10	0.187309	0.81	0.59	3.5963e-06	shared
Pcdh17	2.09704e-16	0.187261	0.995	0.943	3.65557e-12	male specific
Plcb4	6.31238e-11	0.187197	0.636	0.418	1.08857e-06	shared
Msmo1	9.98368e-15	0.184954	0.576	0.33	1.73706e-10	other
Hprt	1.79933e-14	0.183986	0.786	0.495	3.12975e-10	other
Tsr2	6.8307e-14	0.183862	0.688	0.414	1.1869e-09	shared
Cox5a	4.72648e-14	0.183675	0.702	0.436	8.21604e-10	other
Astn1	2.93467e-11	0.1835	0.923	0.719	5.06642e-07	shared
Nrp1	1.13277e-13	0.183298	0.415	0.216	1.96729e-09	shared
Epm2aip1	9.39098e-11	0.183073	0.878	0.698	1.6191e-06	other
Sytl4	6.59079e-19	0.182094	0.124	0.019	1.15062e-14	shared
Kif5c	4.08463e-12	0.182022	0.853	0.656	7.07131e-08	male specific
Ywhah	1.0558e-16	0.181493	0.995	0.956	1.841e-12	shared
Cstf2	3.43937e-14	0.180968	0.578	0.326	5.98004e-10	shared
Rbms3	5.18219e-08	0.180262	0.413	0.264	0.00087833	shared
Snn	2.84147e-13	0.178685	0.616	0.364	4.9325e-09	shared
Rap1gds1	1.6063e-11	0.178153	0.686	0.454	2.77616e-07	male specific
Spon1	2.60324e-08	0.177122	0.338	0.203	0.000442446	shared
Dnaja1	1.4375e-11	0.176233	0.894	0.671	2.485e-07	other
Hapln4	8.96928e-16	0.174803	0.438	0.219	1.56272e-11	other
Cdkl2	3.45101e-12	0.174474	0.61	0.372	5.97508e-08	shared
Myh10	1.30543e-13	0.174137	0.747	0.465	2.26701e-09	other
Stk39	7.88069e-20	0.173848	0.434	0.189	1.3766e-15	male specific
Gdi2	4.50431e-12	0.173316	0.826	0.569	7.79651e-08	other
Gda	3.13586e-06	0.173139	0.63	0.478	0.0517668	other
Sccpdh	1.09547e-12	0.172238	0.639	0.401	1.89943e-08	shared
Snap25	2.26217e-11	0.17099	0.977	0.877	3.90767e-07	male specific
Ola1	4.02055e-16	0.170958	0.557	0.291	7.00742e-12	shared
Pcmt1	2.2157e-10	0.170788	0.801	0.544	3.8141e-06	male specific
Got1	1.46744e-11	0.170524	0.698	0.457	2.53662e-07	male specific
Arxes2	5.9489e-10	0.169847	0.788	0.559	1.02238e-05	male specific
Mrpl42	8.21006e-16	0.169717	0.601	0.328	1.43052e-11	other
Il1rap	5.73529e-17	0.16928	0.388	0.176	1.00035e-12	shared
Prkcb	1.88172e-11	0.169232	0.673	0.428	3.25143e-07	male specific
Rps20	6.95811e-14	0.168898	0.996	0.975	1.20897e-09	shared
Rbbp7	2.84647e-12	0.168745	0.558	0.323	4.92922e-08	shared
Zcchc18	4.82063e-13	0.168465	0.982	0.892	8.36235e-09	other
Unc80	4.34969e-12	0.168111	0.903	0.675	7.52975e-08	shared
Tmsb4x	2.34101e-15	0.167947	1	0.991	4.07546e-11	shared
Mblac2	8.15243e-15	0.1677	0.661	0.37	1.41877e-10	other
Ppia	9.61426e-15	0.167681	0.987	0.883	1.67298e-10	other
Rps10	2.40062e-12	0.16729	0.998	0.971	4.15836e-08	shared
Ptprm	9.49764e-16	0.167084	0.338	0.15	1.65468e-11	other
Selenof	5.45351e-14	0.167047	0.68	0.41	9.47875e-10	shared
Eif1a	1.82581e-12	0.165774	0.598	0.352	3.16432e-08	other
Rps3a1	4.2866e-17	0.165714	1	0.996	7.47754e-13	shared
Rtn4	6.65549e-10	0.165448	0.934	0.75	1.14355e-05	shared
Rplp1	3.31374e-21	0.16544	1	0.998	5.79142e-17	other
Gm10073	6.2377e-19	0.165432	0.338	0.135	1.08904e-14	other
Slitrk6	1.15931e-19	0.165102	0.187	0.047	2.02497e-15	shared
Tiparp	3.77171e-23	0.164758	0.242	0.065	6.59823e-19	other
Crk	1.0713e-13	0.163565	0.686	0.405	1.86063e-09	other
Shisa2	7.21789e-14	0.163259	0.18	0.06	1.25404e-09	shared
Pts	1.07237e-15	0.162682	0.323	0.14	1.86807e-11	other
Ppp2ca	1.24984e-10	0.162649	0.889	0.687	2.15322e-06	other
Pgk1	6.07628e-12	0.162417	0.643	0.401	1.0512e-07	other
Pgrmc1	1.31414e-11	0.161594	0.978	0.84	2.27201e-07	other
Idnk	1.36764e-13	0.160811	0.44	0.231	2.37463e-09	other
Hspa12a	6.25185e-13	0.160498	0.487	0.268	1.08438e-08	male specific
Kcnd2	5.49855e-10	0.160443	0.643	0.429	9.45036e-06	male specific
Atp5f1	9.85343e-12	0.160334	0.738	0.462	1.70386e-07	other
Rps12	2.52928e-14	0.160313	0.996	0.977	4.39817e-10	shared
Cfap36	5.49781e-17	0.160222	0.539	0.268	9.58984e-13	other
Arfgef3	3.13438e-09	0.160221	0.907	0.735	5.36198e-05	shared
Cd83	2.78555e-12	0.159946	0.492	0.281	4.82458e-08	male specific
Cacybp	7.0917e-13	0.159776	0.616	0.364	1.22984e-08	other
Wnt4	3.40737e-11	0.15952	0.28	0.138	5.88045e-07	other
Hs3st2	1.21264e-23	0.159335	0.189	0.037	2.12188e-19	male specific
Dhcr24	1.63876e-14	0.15881	0.487	0.254	2.85062e-10	male specific
Dlgap1	1.92803e-08	0.158678	0.596	0.4	0.000328092	shared
Cnbp	2.75679e-09	0.158441	0.754	0.514	4.71796e-05	other
Ccdc85a	3.52937e-15	0.158353	0.488	0.25	6.14322e-11	shared
Eif4g3	6.3059e-10	0.158227	0.795	0.562	1.08361e-05	other
Chml	8.36969e-17	0.158208	0.246	0.089	1.45951e-12	shared
Rab6b	1.0705e-09	0.158137	0.917	0.734	1.83698e-05	male specific
Sptbn1	5.503e-12	0.157342	0.943	0.792	9.52294e-08	other
Smap1	1.35974e-12	0.157246	0.528	0.303	2.3571e-08	other
Map2k1	3.60274e-10	0.15679	0.828	0.591	6.19743e-06	shared
Meg3	4.86977e-23	0.155596	0.996	1	8.51821e-19	shared
Pdia3	7.36398e-15	0.154453	0.544	0.291	1.28163e-10	shared
Slitrk1	1.55749e-12	0.154166	0.637	0.391	2.6996e-08	shared
Fam8a1	4.66834e-11	0.154161	0.772	0.507	8.05381e-07	other
Pgm2l1	7.24926e-09	0.153874	0.828	0.628	0.000123752	other
Kif5a	1.19212e-10	0.153721	0.93	0.742	2.05414e-06	male specific
Sqle	1.19633e-16	0.15366	0.373	0.165	2.08592e-12	other
Ina	3.62489e-08	0.153445	0.887	0.731	0.000615326	male specific
Dynlt3	5.78383e-12	0.153391	0.526	0.303	1.00078e-07	other
Cpe	2.15188e-09	0.15339	0.953	0.824	3.68553e-05	other
Rps15a	7.59403e-14	0.153055	1	0.988	1.31931e-09	shared
Stk19	1.91224e-10	0.153028	0.497	0.296	3.29231e-06	shared
Gabra5	1.05026e-13	0.152953	0.445	0.231	1.82419e-09	male specific
Bend6	1.692e-08	0.152672	0.772	0.581	0.000288013	male specific
Idh1	3.50655e-14	0.151908	0.445	0.229	6.09649e-10	male specific
AF529169	7.12968e-18	0.150427	0.242	0.08	1.24406e-13	other
Ndufa4	1.72179e-10	0.15021	0.806	0.561	2.96492e-06	male specific
Hsph1	1.22983e-08	0.150145	0.874	0.684	0.00020965	shared
Npy1r	1.43248e-10	0.149675	0.241	0.113	2.46731e-06	other
Snx10	8.01648e-10	0.149653	0.74	0.508	1.37667e-05	other
Rpl30	9.0477e-14	0.148794	0.995	0.969	1.57168e-09	shared
Vdac2	4.91316e-10	0.14833	0.666	0.422	8.44572e-06	other
Plcb1	8.73226e-10	0.148065	0.488	0.304	1.49942e-05	male specific
Impact	5.8128e-12	0.147978	0.998	0.976	1.00573e-07	male specific
Nsf	5.38812e-11	0.147958	0.973	0.894	9.29397e-07	male specific
Ddhd1	1.34996e-08	0.147891	0.463	0.297	0.000230007	other
Vps35	1.15559e-12	0.147438	0.68	0.405	2.00344e-08	other
Rps27rt	3.25266e-11	0.147092	0.873	0.604	5.61377e-07	shared
Kif5b	3.67244e-10	0.146839	0.896	0.648	6.31659e-06	other
Kifap3	5.07422e-07	0.14679	0.876	0.702	0.00849474	male specific
Ywhaq	1.55848e-09	0.146786	0.95	0.823	2.67202e-05	other
Dld	4.0349e-13	0.145627	0.431	0.226	7.00014e-09	other
Ssb	2.31295e-12	0.145286	0.688	0.433	4.00696e-08	other
Hspa4	7.94648e-10	0.144612	0.711	0.477	1.36473e-05	other
Chn1	9.64265e-09	0.144589	0.777	0.546	0.000164504	male specific
Trim32	4.96587e-10	0.144511	0.697	0.458	8.53583e-06	other
Nrsn1	1.2118e-10	0.144485	0.989	0.944	2.08794e-06	shared
Nap1l2	9.12244e-15	0.144441	0.519	0.275	1.58749e-10	other
Nedd4	1.0303e-10	0.144265	0.964	0.829	1.77593e-06	other
Nop56	2.09248e-09	0.144076	0.697	0.45	3.58442e-05	shared
Polr3k	6.67438e-14	0.143757	0.461	0.243	1.15981e-09	other
Inpp5f	5.19314e-07	0.143558	0.892	0.702	0.00869228	other
Cdkl5	3.86184e-10	0.14355	0.571	0.349	6.64198e-06	shared
Rpl17	1.31928e-14	0.143128	1	0.998	2.29502e-10	shared
Atp5e	6.4948e-08	0.142408	0.899	0.714	0.00109983	male specific
Lrrfip2	1.71393e-12	0.14155	0.409	0.213	2.97059e-08	other
Arhgap36	9.00713e-06	0.141469	0.361	0.241	0.146924	other
Cadps2	1.25826e-07	0.141197	0.357	0.222	0.00212381	male specific
Tenm2	1.4193e-10	0.141122	0.517	0.309	2.44474e-06	male specific
Grin3a	4.59968e-06	0.141028	0.429	0.291	0.0755774	other
Large1	5.39878e-14	0.140968	0.467	0.239	9.38416e-10	shared
Tbca	1.45639e-09	0.140622	0.928	0.76	2.4977e-05	other
Ephb1	5.33777e-09	0.140542	0.372	0.218	9.11958e-05	male specific
Clstn2	2.68816e-12	0.140403	0.291	0.136	4.65616e-08	male specific
Fth1	1.66886e-18	0.139449	1	0.999	2.913e-14	male specific
Rpl22	3.39095e-09	0.139427	0.903	0.721	5.80022e-05	shared
Eps15	3.86366e-12	0.139262	0.542	0.306	6.68915e-08	male specific
Atp2a2	8.32149e-09	0.13884	0.903	0.73	0.000142031	male specific
Atp6v1a	8.50208e-09	0.138669	0.978	0.881	0.000145097	male specific
Lpgat1	3.56758e-09	0.137826	0.743	0.51	6.10055e-05	male specific
Syndig1l	9.15084e-12	0.137704	0.23	0.099	1.58255e-07	male specific
Gpbp1	1.79791e-11	0.13711	0.628	0.372	3.10678e-07	shared
Rad23b	1.87405e-08	0.13699	0.79	0.591	0.000318945	shared
Hcrtr1	5.53894e-19	0.136973	0.167	0.038	9.67099e-15	other
Rtn3	3.5773e-11	0.136737	0.995	0.96	6.17299e-07	male specific
Tmod2	1.47738e-08	0.136485	0.905	0.706	0.000251627	other
Tatdn1	1.04782e-12	0.13634	0.553	0.304	1.81692e-08	other
Fkbp2	3.74158e-08	0.136254	0.74	0.516	0.000635058	other
Synj1	1.7753e-09	0.136127	0.962	0.835	3.04251e-05	other
AW551984	6.24188e-09	0.136095	0.898	0.723	0.000106593	shared
Acvr1c	1.97712e-19	0.135948	0.127	0.019	3.45284e-15	male specific
Rpl9-ps6	1.27516e-15	0.135847	0.37	0.165	2.2207e-11	shared
Tspan3	1.30726e-08	0.135729	0.792	0.565	0.000222784	other
Cntn1	2.84336e-07	0.135472	0.944	0.827	0.00477771	male specific
Camta1	2.00864e-11	0.135172	0.982	0.897	3.47053e-07	shared
Acsl3	2.35849e-10	0.135106	0.592	0.355	4.05943e-06	male specific
Gabrb3	1.99198e-07	0.134702	0.847	0.629	0.0033543	male specific
Hspd1	1.06738e-10	0.134537	0.693	0.426	1.83963e-06	other
Ttbk2	8.35029e-09	0.134514	0.774	0.552	0.000142514	male specific
Eloc	2.93884e-11	0.134267	0.716	0.439	5.07331e-07	other
Ywhab	2.03671e-11	0.13384	0.986	0.967	3.51883e-07	other
Rpl18	5.6048e-08	0.132952	0.984	0.918	0.000949677	shared
Sacs	3.11103e-14	0.132809	0.325	0.146	5.40946e-10	other
Glra3	1.85657e-09	0.13275	0.476	0.289	3.18141e-05	other
Ldlr	8.63175e-18	0.132066	0.336	0.135	1.50607e-13	other
Rps4x	9.16787e-09	0.131502	1	0.995	0.000156422	shared
Nell1	2.57462e-08	0.131493	0.494	0.319	0.000437634	other
Zyg11b	1.19184e-08	0.131393	0.749	0.508	0.000203184	other
B4gat1	2.23387e-11	0.13122	0.463	0.258	3.85901e-07	other
Gpd2	3.23718e-11	0.130964	0.576	0.34	5.58738e-07	male specific
Ppid	2.07678e-12	0.130639	0.436	0.229	3.59823e-08	other
Lhfpl3	1.3519e-13	0.130522	0.393	0.194	2.34744e-09	shared
Gpr101	4.84465e-06	0.130471	0.415	0.282	0.0795733	other
Mfsd6	1.72387e-09	0.130323	0.689	0.439	2.95471e-05	other
Tceal9	1.44104e-07	0.129974	0.919	0.762	0.00243017	male specific
Stim2	6.22491e-14	0.129814	0.368	0.175	1.08183e-09	other
Rpl21	3.55263e-13	0.129675	1	0.996	6.16523e-09	other
Ubqln2	4.4399e-07	0.129627	0.792	0.612	0.00743905	male specific
Ran	2.57374e-07	0.129505	0.91	0.728	0.00432748	male specific
Herc2	2.21625e-08	0.128188	0.662	0.439	0.000376983	other
Plcxd3	1.66148e-11	0.127914	0.452	0.254	2.87137e-07	shared
Ppp3r1	1.98088e-08	0.127689	0.957	0.812	0.000337047	male specific
Rab6a	6.36119e-09	0.127415	0.984	0.894	0.000108624	male specific
Ppp2r2c	5.78929e-08	0.127171	0.853	0.661	0.000980822	male specific
Ogdh	1.85453e-08	0.127069	0.729	0.492	0.000315641	male specific
Ube2e1	3.04363e-09	0.126863	0.684	0.447	5.20734e-05	shared
Rprm	4.1602e-10	0.126718	0.483	0.29	7.1543e-06	shared
5730455P16Rik	1.80708e-09	0.126459	0.603	0.384	3.09679e-05	other
Cfl1	2.05183e-08	0.126449	0.964	0.86	0.000349098	other
Rps6ka6	3.12722e-12	0.12624	0.293	0.136	5.41477e-08	shared
Mindy3	2.19386e-15	0.126235	0.363	0.163	3.81996e-11	other
Arxes1	3.06638e-13	0.126057	0.487	0.256	5.32231e-09	other
Pdcd7	2.81165e-09	0.125968	0.54	0.33	4.8113e-05	male specific
Nap1l3	9.31855e-10	0.125621	0.612	0.382	1.59981e-05	male specific
Nbea	1.79295e-07	0.125512	0.813	0.619	0.00302076	other
Ankib1	8.85235e-12	0.125375	0.399	0.208	1.5311e-07	other
Ryr2	3.9961e-11	0.124975	0.485	0.277	6.89448e-07	male specific
Tmem50b	1.31584e-08	0.124307	0.591	0.381	0.000224232	other
Ggct	6.16546e-14	0.123975	0.276	0.116	1.07156e-09	other
Arf1	1.34173e-07	0.123624	0.939	0.807	0.0022635	male specific
Larp4b	9.06424e-08	0.123449	0.795	0.563	0.00153294	other
Park2	3.50579e-11	0.12337	0.314	0.155	6.04994e-07	other
Enah	7.43846e-05	0.123226	0.907	0.754	1	other
Hnrnpa3	1.47202e-06	0.12315	0.923	0.765	0.0244502	other
Umad1	8.10682e-10	0.122849	0.506	0.301	1.3921e-05	male specific
Dnajc21	3.66331e-10	0.122436	0.517	0.305	6.30125e-06	other
Col4a3bp	6.36268e-13	0.122302	0.501	0.264	1.10354e-08	male specific
A830018L16Rik	2.83218e-12	0.122202	0.388	0.196	4.90477e-08	male specific
Diaph3	1.01101e-12	0.122191	0.23	0.093	1.75319e-08	other
Sall2	1.49833e-09	0.122052	0.503	0.303	2.56919e-05	male specific
Arl6	2.90129e-12	0.12193	0.37	0.184	5.02388e-08	other
Kidins220	1.00962e-07	0.121868	0.853	0.638	0.00170637	male specific
Nap1l5	7.34564e-08	0.121701	1	0.999	0.00124318	shared
Paip2	1.38243e-07	0.121662	0.82	0.599	0.00233189	other
Zfp638	5.04904e-11	0.121568	0.564	0.325	8.71009e-07	other
Fam171b	3.5447e-07	0.121552	0.907	0.762	0.005948	other
Cckar	2.09232e-10	0.121149	0.199	0.086	3.60193e-06	other
Clvs1	1.12179e-11	0.121006	0.372	0.192	1.93969e-07	other
Fat3	1.95674e-09	0.120822	0.409	0.238	3.35248e-05	male specific
Fbxo9	1.83072e-07	0.120783	0.763	0.542	0.00308385	other
Hrasls	7.09482e-12	0.120736	0.316	0.151	1.22726e-07	other
Itfg1	1.48353e-06	0.120143	0.788	0.591	0.02464	other
Wrnip1	5.97265e-12	0.119807	0.402	0.206	1.03333e-07	other
Nrcam	6.65877e-09	0.119735	0.42	0.251	0.000113698	other
Mc3r	2.94715e-15	0.11961	0.169	0.048	5.13011e-11	other
St8sia3	1.40241e-08	0.119456	0.741	0.505	0.000238887	other
Erich3	9.06876e-12	0.118866	0.368	0.185	1.56844e-07	other
Wdr89	1.83877e-10	0.118817	0.546	0.315	3.16599e-06	shared
Klhl7	2.25988e-09	0.11872	0.641	0.396	3.87005e-05	other
Lancl3	2.09425e-14	0.11864	0.171	0.052	3.6419e-10	male specific
Ccnb1ip1	4.86986e-10	0.118383	0.37	0.207	8.37178e-06	other
Pid1	1.31584e-07	0.118072	0.496	0.325	0.00222022	male specific
Krt222	2.02807e-12	0.118012	0.28	0.126	3.51425e-08	shared
Neo1	1.13813e-08	0.117905	0.431	0.259	0.000194062	shared
Rab9b	1.66526e-08	0.117878	0.763	0.531	0.000283478	other
Kcns2	2.24562e-08	0.117846	0.346	0.201	0.000381957	shared
Frmd4a	9.76898e-11	0.117731	0.603	0.356	1.68398e-06	other
Rab1a	2.25971e-06	0.117719	0.874	0.681	0.0374139	male specific
Hsp90aa1	4.86628e-09	0.117539	0.977	0.921	8.31648e-05	other
Dcp2	9.41684e-10	0.117533	0.519	0.304	1.61659e-05	other
Ralgps2	3.70184e-09	0.117308	0.513	0.303	6.32978e-05	shared
Efemp1	3.01278e-16	0.117077	0.083	0.007	5.25128e-12	other
Lrfn5	1.26898e-06	0.116751	0.903	0.721	0.0211018	shared
Cntnap4	1.90089e-09	0.11666	0.517	0.31	3.25699e-05	other
Idh3a	1.33153e-07	0.116511	0.715	0.497	0.00224642	male specific
Fam126b	8.14264e-07	0.116422	0.74	0.515	0.0135892	male specific
Fam92a	5.90459e-11	0.116251	0.492	0.275	1.01836e-06	shared
Syn2	1.30464e-05	0.115989	0.925	0.787	0.211835	other
Rasgrf2	0.000210541	0.115941	0.67	0.546	1	other
Cyp51	8.0562e-12	0.115752	0.366	0.184	1.39348e-07	other
Scd1	7.48628e-16	0.115332	0.174	0.05	1.30448e-11	male specific
Map1b	6.74241e-10	0.115247	1	0.977	1.15835e-05	other
Vps50	2.75309e-11	0.11491	0.474	0.261	4.75375e-07	other
Manea	3.09091e-13	0.114881	0.341	0.158	5.36458e-09	male specific
9330182L06Rik	2.78069e-11	0.114759	0.372	0.193	4.80114e-07	male specific
Ublcp1	1.03297e-10	0.114618	0.341	0.175	1.78042e-06	other
Rheb	7.13088e-08	0.114573	0.75	0.49	0.00120704	other
Stard4	3.73014e-13	0.114436	0.284	0.123	6.47254e-09	male specific
Csnk1g2	3.48375e-10	0.1143	0.54	0.313	5.99379e-06	other
Atxn7l1	1.4854e-12	0.114209	0.338	0.16	2.57479e-08	other
Polr2k	2.53862e-11	0.114054	0.598	0.339	4.38444e-07	other
Tnxb	1.09186e-15	0.113965	0.106	0.017	1.9018e-11	shared
Cep19	4.1797e-10	0.113622	0.539	0.315	7.18741e-06	other
H2-Q2	6.35232e-12	0.113574	0.223	0.092	1.09889e-07	shared
Txnl1	1.10169e-09	0.113292	0.573	0.346	1.8904e-05	male specific
Rpf2	1.70416e-11	0.112831	0.208	0.087	2.94496e-07	other
Rspo1	2.98312e-10	0.112777	0.35	0.191	5.13336e-06	male specific
Atxn2	6.25664e-08	0.11269	0.607	0.403	0.00105969	male specific
Plp1	4.0554e-09	0.112329	0.598	0.381	6.9327e-05	male specific
Ptcd3	2.09409e-11	0.112144	0.294	0.139	3.61775e-07	male specific
Fam217b	1.53772e-09	0.112135	0.537	0.321	2.63657e-05	male specific
Opn3	1.41919e-11	0.112048	0.165	0.06	2.45349e-07	shared
Cops2	9.24241e-09	0.111998	0.637	0.403	0.000157685	other
Rpl31	2.37323e-09	0.111925	1	0.993	4.06321e-05	shared
Fbxo33	3.32399e-08	0.111915	0.63	0.401	0.000564414	male specific
Kif1b	8.85e-07	0.111911	0.961	0.836	0.01476	male specific
Vamp1	1.11534e-10	0.111766	0.345	0.178	1.92217e-06	male specific
Htr7	2.51058e-11	0.111258	0.189	0.074	4.33627e-07	male specific
Paics	2.28644e-11	0.111253	0.393	0.203	3.94936e-07	other
Araf	3.27215e-06	0.111245	0.962	0.846	0.0539806	other
Fxyd7	5.16056e-09	0.111178	0.497	0.301	8.81785e-05	male specific
Hs2st1	7.06025e-07	0.110914	0.666	0.443	0.0117956	other
Abce1	1.75838e-09	0.110804	0.456	0.266	3.01369e-05	other
Rac1	7.69513e-05	0.110501	0.894	0.73	1	other
Hsbp1	3.49289e-07	0.110147	0.894	0.695	0.00586177	shared
Nus1	1.4253e-08	0.110044	0.609	0.388	0.000242771	male specific
Maf	2.63995e-11	0.110018	0.158	0.055	4.55867e-07	shared
Pip4k2a	2.9939e-07	0.109832	0.305	0.178	0.00502915	shared
Sucla2	6.08895e-10	0.109535	0.562	0.335	1.04639e-05	other
Cap2	1.52102e-11	0.10931	0.474	0.259	2.62908e-07	shared
Mal2	1.01109e-08	0.109238	0.494	0.301	0.000172481	other
Nap1l1	2.50367e-05	0.109122	0.907	0.71	0.40294	other
Pcp4l1	3.18993e-11	0.108838	0.192	0.076	5.50614e-07	other
Ryr3	5.25298e-12	0.108768	0.259	0.113	9.0908e-08	male specific
BC003331	8.41588e-11	0.108746	0.402	0.217	1.45107e-06	male specific
Ajap1	3.65071e-11	0.108582	0.241	0.107	6.29929e-07	male specific
Tppp	1.15837e-05	0.108128	0.817	0.637	0.188328	other
Itm2c	2.13371e-09	0.107957	0.998	0.971	3.65483e-05	shared
Magi1	9.98428e-07	0.107735	0.777	0.57	0.0166348	male specific
Fgfr1op2	2.44271e-08	0.107581	0.63	0.394	0.000415359	other
Snrpd1	1.6165e-08	0.107489	0.524	0.316	0.000275241	other
Rab27b	1.08718e-06	0.107223	0.731	0.517	0.0181016	other
Ar	0.000234869	0.107131	0.829	0.698	1	other
Mfn2	1.32196e-08	0.106948	0.627	0.407	0.000225262	other
Peg3	4.15966e-09	0.106886	0.998	0.992	7.11052e-05	shared
Tmem164	5.51512e-12	0.10685	0.214	0.085	9.54336e-08	other
Pclo	6.49633e-08	0.106842	0.876	0.703	0.00110002	other
Dock4	4.56192e-09	0.10678	0.35	0.196	7.79724e-05	male specific
Lrrn3	2.13699e-09	0.106763	0.539	0.323	3.66023e-05	other
Ece2	1.60933e-10	0.10676	0.411	0.22	2.77159e-06	male specific
Cacul1	1.13736e-08	0.106704	0.6	0.371	0.000193942	shared
Plxnc1	1.04991e-06	0.106641	0.607	0.42	0.0174863	shared
Chtop	1.28456e-07	0.106628	0.634	0.42	0.00216783	male specific
Grin2a	3.17849e-11	0.106411	0.273	0.127	5.4867e-07	male specific
Pcmtd1	7.69464e-08	0.106266	0.549	0.349	0.00130186	other
Sel1l	4.30026e-06	0.106226	0.808	0.573	0.0707178	other
R3hdm1	1.44518e-05	0.106178	0.803	0.608	0.23435	other
Wdr47	3.95652e-07	0.105983	0.709	0.483	0.0066343	male specific
Acly	7.0897e-07	0.105773	0.607	0.401	0.0118441	other
Camk2b	5.23382e-06	0.105664	0.944	0.834	0.0859027	other
Pnma3	1.06594e-09	0.105508	0.645	0.396	1.82926e-05	other
Rabep1	1.36843e-06	0.105039	0.745	0.521	0.022742	other
Eef1e1	1.18175e-08	0.104976	0.49	0.297	0.000201476	male specific
Wnk3	7.04097e-10	0.104961	0.44	0.247	1.2095e-05	male specific
Bnip3	2.80002e-10	0.104951	0.433	0.241	4.81856e-06	other
Tmem158	7.5308e-06	0.104647	0.795	0.595	0.123121	other
Scn2a	3.53224e-05	0.104577	0.964	0.838	0.565405	other
Aatk	3.79045e-07	0.104517	0.783	0.554	0.00635734	male specific
Dcaf7	2.23302e-06	0.104305	0.898	0.705	0.0369789	other
Caln1	3.41681e-09	0.104158	0.395	0.224	5.84412e-05	male specific
Cadm2	8.20389e-06	0.104131	0.61	0.429	0.133978	other
Dzank1	3.83138e-05	0.103884	0.899	0.742	0.612714	other
Zfp120	1.11685e-12	0.103693	0.259	0.109	1.93639e-08	other
Rpl7	7.95803e-05	0.103686	0.991	0.962	1	other
Tuba1b	3.16351e-06	0.10362	0.943	0.833	0.0522137	other
Trim44	1.13569e-05	0.103213	0.817	0.607	0.184721	other
Rab2a	6.60216e-06	0.10298	0.862	0.698	0.108124	other
Socs2	2.27992e-09	0.102974	0.172	0.071	3.90413e-05	other
Whrn	1.32144e-07	0.102946	0.23	0.12	0.00222953	other
Cycs	3.50272e-06	0.10279	0.688	0.474	0.0577143	other
Ipo7	3.85194e-08	0.102731	0.47	0.289	0.000653636	male specific
Nme1	1.73011e-05	0.102523	0.82	0.609	0.28	other
Dcun1d4	2.71405e-06	0.102454	0.693	0.491	0.0448552	male specific
Zfp385b	2.60961e-11	0.102451	0.287	0.136	4.50654e-07	male specific
Gabra3	3.47698e-07	0.10243	0.697	0.462	0.00583541	shared
Cct8	8.25131e-09	0.102427	0.655	0.41	0.000140842	other
Fundc2	1.30773e-09	0.10217	0.479	0.276	2.24302e-05	male specific
Zfyve9	1.59621e-09	0.102087	0.327	0.173	2.73622e-05	male specific
Fam84a	8.83481e-10	0.102084	0.476	0.277	1.51694e-05	male specific
Disp2	3.70474e-06	0.101936	0.957	0.847	0.061017	other
Dynll2	1.09896e-07	0.10189	0.996	0.971	0.00185637	male specific
Ubqln1	3.3198e-07	0.101801	0.732	0.506	0.00557362	other
Pwwp2a	1.70023e-09	0.101686	0.323	0.172	2.91437e-05	other
Ank1	7.56643e-11	0.101576	0.28	0.134	1.30476e-06	male specific
Vps13a	5.81981e-09	0.101482	0.469	0.279	9.94198e-05	other
Srsf3	1.10233e-05	0.101273	0.856	0.656	0.179382	other
Elmo1	2.76791e-05	0.100914	0.646	0.468	0.444803	other
Miga1	6.64469e-10	0.100837	0.639	0.385	1.14176e-05	male specific
Limk1	3.50655e-10	0.100698	0.456	0.256	6.03267e-06	male specific
Bhlhb9	3.4618e-09	0.100565	0.361	0.199	5.92072e-05	other
Stx7	4.59824e-06	0.100171	0.77	0.575	0.0755583	other
Gpr22	9.76581e-10	0.100107	0.223	0.103	1.6763e-05	male specific
Usp34	3.49162e-06	0.100097	0.923	0.731	0.0575348	other
2610002M06Rik	3.30919e-09	0.10008	0.4	0.228	5.6607e-05	other
Zfp365	2.66749e-08	0.099999	0.519	0.32	0.000453314	other
Pfn2	1.51625e-05	0.0998883	0.952	0.831	0.245799	other
Sh3gl2	2.38196e-07	0.0998282	0.661	0.434	0.00400694	other
Armcx4	3.92601e-09	0.0997745	0.492	0.288	6.71229e-05	other
Rpl36a-ps1	2.00627e-12	0.0995625	0.232	0.094	3.47666e-08	other
Ndufs4	9.7895e-10	0.099387	0.508	0.293	1.68027e-05	other
Arhgef9	3.83297e-06	0.0991653	0.732	0.545	0.0630946	other
Caprin1	3.4321e-06	0.0990833	0.865	0.654	0.0565781	other
Fam69a	4.55125e-10	0.0990715	0.226	0.103	7.82496e-06	other
4833439L19Rik	2.47779e-07	0.0989008	0.603	0.389	0.00416641	other
Tmem183a	6.17975e-09	0.0988852	0.591	0.37	0.000105538	other
Ogt	4.97272e-05	0.098865	0.946	0.816	0.792005	other
Mettl9	7.05957e-07	0.0988457	0.587	0.385	0.0117951	other
Tgfb2	1.13026e-07	0.098842	0.108	0.04	0.00190889	other
Atp6v1d	3.86555e-07	0.0987815	0.722	0.507	0.00648292	other
Ube2d2a	1.98867e-06	0.0984332	0.833	0.637	0.0329681	other
Adgrl2	1.66058e-08	0.098427	0.291	0.159	0.000282698	other
Strap	1.37313e-07	0.0984019	0.664	0.432	0.00231633	other
Eef1a1	1.68113e-06	0.0982344	1	0.998	0.0278967	other
Glyr1	2.05815e-05	0.0980985	0.767	0.561	0.332185	other
Zhx1	2.30347e-09	0.0980429	0.397	0.224	3.94423e-05	other
Rpl7a	2.32179e-05	0.0980179	0.991	0.929	0.374016	other
Pim3	2.55264e-11	0.0978788	0.3	0.142	4.40841e-07	other
Cobl	1.20741e-09	0.097867	0.316	0.165	2.07118e-05	other
Ret	2.83101e-08	0.0978479	0.212	0.103	0.000481017	other
Gria1	2.58145e-05	0.0976557	0.824	0.656	0.415277	other
Rps25	4.01325e-08	0.0975756	1	0.995	0.000680808	other
Ndufb6	3.06434e-09	0.0974799	0.474	0.275	5.24247e-05	other
Pfdn4	2.58351e-08	0.0974514	0.51	0.31	0.000439119	other
Hspa4l	0.000162235	0.0974051	0.803	0.613	1	other
Lancl2	1.19627e-09	0.0972273	0.404	0.221	2.0522e-05	other
Esr1	1.58527e-09	0.096909	0.682	0.434	2.71778e-05	other
Agtpbp1	3.46646e-07	0.0967822	0.544	0.35	0.0058181	other
Nt5c3	5.4374e-11	0.0967421	0.429	0.226	9.37843e-07	other
Mbnl2	2.77632e-06	0.096612	0.794	0.6	0.0458759	other
Myo9a	5.52176e-08	0.096582	0.526	0.327	0.000935663	other
Arl5a	1.50284e-06	0.0964927	0.566	0.382	0.0249546	other
Pik3r3	3.5696e-08	0.0964722	0.332	0.187	0.000605975	other
Reep5	1.56797e-05	0.0962844	0.944	0.804	0.254058	other
Grsf1	1.47419e-09	0.0962588	0.555	0.323	2.52793e-05	other
Tpd52l1	4.44015e-08	0.0959444	0.312	0.175	0.00075296	other
Exoc5	4.11169e-08	0.0959224	0.558	0.345	0.000697425	other
Glra2	3.87529e-08	0.0958972	0.368	0.214	0.000657558	other
Hmgcr	9.15526e-07	0.0957018	0.589	0.397	0.0152636	other
Pstk	4.47758e-09	0.095692	0.44	0.256	7.65353e-05	other
Syne2	5.8539e-07	0.0956789	0.248	0.136	0.00979298	other
A230057D06Rik	1.26938e-07	0.0954465	0.58	0.376	0.00214233	other
Mrap2	0.00064076	0.0954037	0.415	0.31	1	other
Ecel1	1.91277e-07	0.0951767	0.727	0.527	0.00322167	other
Rnf157	1.13444e-06	0.0951409	0.612	0.411	0.0188806	other
Neto2	1.07164e-07	0.0950739	0.32	0.183	0.00181065	other
Polr1d	2.29072e-05	0.0950677	0.779	0.589	0.369172	other
Rims2	1.59747e-06	0.0950471	0.636	0.437	0.0265165	other
Ezr	1.15597e-09	0.0949642	0.135	0.048	1.98341e-05	other
Elavl4	4.88307e-05	0.0946868	0.908	0.73	0.778019	other
Nell2	7.88017e-07	0.0945481	0.594	0.4	0.0131544	other
Tcf25	4.7137e-05	0.0944435	0.977	0.882	0.751458	other
Tspan13	9.61072e-05	0.0944348	0.828	0.618	1	other
Mcts1	1.59143e-11	0.0943057	0.39	0.197	2.75062e-07	other
Phf6	2.43668e-08	0.0941514	0.406	0.238	0.000414357	other
Pcdh20	7.54522e-08	0.0941509	0.535	0.344	0.00127665	other
Calm3	1.54168e-05	0.0941121	0.984	0.922	0.249876	other
Ncoa7	5.736e-05	0.0940918	0.882	0.696	0.910705	other
Kcnj3	2.583e-09	0.0939423	0.447	0.25	4.42133e-05	other
Ube2n	2.11984e-05	0.0939132	0.829	0.641	0.341994	other
Rpl26	7.16885e-08	0.0938028	1	0.999	0.0012134	other
Calm2	4.32963e-07	0.0935526	1	0.988	0.00725473	other
0610010F05Rik	1.17073e-09	0.093528	0.413	0.226	2.00862e-05	other
Dclk1	8.57698e-05	0.0934995	0.935	0.761	1	other
Scrn1	0.000113616	0.0934734	0.874	0.732	1	other
Dgkb	4.75673e-07	0.0932491	0.716	0.498	0.00796704	other
Specc1	2.25366e-09	0.0931965	0.375	0.206	3.85961e-05	other
1810030O07Rik	1.59396e-09	0.0931518	0.271	0.136	2.73253e-05	other
Hspa9	3.57517e-07	0.0930899	0.655	0.434	0.00599878	other
Daam1	8.22848e-08	0.0929273	0.521	0.32	0.00139185	other
Frmd5	4.68474e-10	0.092854	0.206	0.09	8.05401e-06	other
Copb2	3.67046e-11	0.092777	0.26	0.118	6.333e-07	other
Rpl23a	1.99487e-06	0.0926986	1	0.997	0.0330649	other
Map1lc3a	1.92246e-05	0.0926523	0.93	0.806	0.310516	other
Ssr3	5.94129e-06	0.0926427	0.732	0.503	0.0973838	other
Rabgap1l	7.56732e-07	0.0924857	0.632	0.411	0.0126359	other
Chchd10	4.27465e-05	0.0924084	0.82	0.651	0.682406	other
Trappc6b	5.06296e-05	0.092124	0.808	0.618	0.806074	other
Ccdc92	1.1624e-05	0.0920998	0.657	0.461	0.188971	other
Rbfox3	0.000128871	0.0919604	0.813	0.651	1	other
Vldlr	3.98831e-08	0.0918906	0.404	0.236	0.000676657	other
Cartpt	0.000110876	0.0918491	0.158	0.092	1	other
Susd4	1.24893e-05	0.0918433	0.709	0.498	0.202914	other
Camk2n2	2.3404e-05	0.0918333	0.855	0.665	0.376991	other
Fabp5	4.0925e-07	0.0918088	0.553	0.354	0.00685943	other
Ccdc88a	1.11364e-06	0.0917684	0.729	0.493	0.0185377	other
Nipsnap3b	6.67827e-10	0.0914653	0.19	0.08	1.14739e-05	other
Slc25a3	1.74686e-05	0.0914285	0.883	0.717	0.282573	other
Tnfrsf21	6.2261e-07	0.0913654	0.58	0.377	0.0104125	other
Cetn2	6.44821e-08	0.0912449	0.379	0.223	0.00109207	other
Kalrn	5.61554e-08	0.0910658	0.689	0.448	0.000951441	other
Cand1	1.73585e-06	0.0910354	0.636	0.43	0.0287978	other
Hars	7.33276e-10	0.0909574	0.373	0.196	1.25947e-05	other
Sall1	5.86159e-09	0.0909463	0.135	0.051	0.000100128	other
Hspa8	9.96644e-06	0.0909054	0.984	0.938	0.162393	other
Armcx1	2.41034e-07	0.0906989	0.485	0.309	0.00405419	other
Aak1	1.73137e-05	0.0905187	0.819	0.607	0.280188	other
Dynll1	0.00036308	0.0904936	0.896	0.732	1	other
Nop10	8.30634e-06	0.0904039	0.779	0.549	0.135601	other
Uvssa	7.48321e-09	0.090389	0.257	0.129	0.000127738	other
Nipsnap2	2.77523e-08	0.0901476	0.413	0.24	0.000471567	other
Rps17	5.01734e-06	0.0901197	0.998	0.992	0.0823848	other
Dnajc15	2.54205e-09	0.0901037	0.463	0.268	4.35149e-05	other
Nova1	1.36671e-06	0.0900443	0.632	0.427	0.0227148	other
Pou6f2	1.10127e-07	0.0897261	0.153	0.067	0.00186016	other
Ankrd13c	1.26652e-07	0.089688	0.478	0.294	0.00213763	other
Asb13	3.08269e-10	0.0896472	0.257	0.118	5.30408e-06	other
Fam78b	1.28232e-10	0.0896294	0.259	0.118	2.20905e-06	other
Capzb	4.86795e-06	0.0895964	0.729	0.513	0.0799513	other
Sec22a	3.20552e-08	0.0894795	0.226	0.115	0.000544393	other
Chst2	6.44929e-08	0.0894428	0.309	0.169	0.00109219	other
Gap43	4.9705e-05	0.0894316	0.995	0.98	0.79175	other
Zrsr1	2.59539e-07	0.0893804	0.533	0.34	0.00436337	other
Sorbs2	2.78049e-06	0.0892483	0.528	0.349	0.0459421	other
Cdr2	1.24105e-10	0.089233	0.192	0.078	2.13821e-06	other
Pafah1b1	5.69939e-06	0.0891332	0.978	0.872	0.0934586	other
Tspyl3	8.18525e-07	0.0890668	0.452	0.289	0.0136595	other
Smim13	5.95729e-06	0.0889271	0.627	0.427	0.0976399	other
Ube2j1	2.49241e-05	0.088874	0.628	0.456	0.401153	other
Stard7	1.90602e-08	0.088784	0.63	0.392	0.000324366	other
Hnrnpa1	5.4321e-06	0.0886988	0.969	0.854	0.0891354	other
Tmem26	1.22109e-07	0.0886418	0.135	0.057	0.0020612	other
Elovl6	3.67954e-07	0.0886337	0.519	0.335	0.0061728	other
Mgat5	1.20464e-07	0.0886208	0.519	0.318	0.00203355	other
A730017C20Rik	8.2372e-05	0.0886199	0.885	0.741	1	other
Nefh	3.99187e-10	0.0885916	0.309	0.155	6.86521e-06	other
Rab39b	2.09517e-08	0.0885824	0.33	0.183	0.000356409	other
Clmp	3.35e-07	0.0885526	0.463	0.288	0.00562397	other
Tubb4b	5.29796e-07	0.0884854	0.557	0.365	0.00886719	other
Enpp2	0.000542192	0.0884474	0.194	0.125	1	other
Rplp2	2.79384e-05	0.0884175	0.998	0.991	0.448886	other
Rybp	7.0454e-08	0.0883744	0.575	0.365	0.00119265	other
Tcp1	0.000220416	0.0883555	0.813	0.633	1	other
Lcorl	1.90606e-07	0.0883357	0.312	0.177	0.00321056	other
Rps2	0.000338898	0.0882067	1	0.99	1	other
Bicd1	9.76261e-06	0.0880127	0.779	0.552	0.159101	other
Shisa6	6.08298e-08	0.0879864	0.117	0.044	0.00103046	other
Acat2	2.52768e-08	0.0878215	0.408	0.237	0.00042968	other
Elovl5	2.447e-09	0.0878108	0.329	0.174	4.18903e-05	other
Lypd6b	3.97983e-09	0.0877926	0.183	0.08	6.80392e-05	other
AC101921.1	1.45522e-10	0.0877885	0.147	0.052	2.50632e-06	other
Snx5	2.92682e-08	0.0877495	0.368	0.21	0.000497237	other
Hnrnpul2	6.9196e-06	0.087513	0.761	0.567	0.113246	other
Dock10	2.35646e-10	0.0874923	0.199	0.084	4.05617e-06	other
Dpp6	3.20344e-05	0.087479	0.892	0.731	0.513576	other
Tmx2	4.87155e-05	0.087335	0.813	0.627	0.776232	other
Igip	3.9147e-05	0.087081	0.79	0.58	0.625725	other
Ube2r2	5.10292e-05	0.0870183	0.718	0.537	0.812334	other
AI504432	8.90009e-06	0.086945	0.628	0.426	0.145187	other
Gm32014	3.66726e-13	0.0867486	0.118	0.028	6.3638e-09	other
Cib2	0.000131701	0.0866961	0.706	0.52	1	other
Cadps	0.000271589	0.08669	0.837	0.649	1	other
Pard3	2.52747e-08	0.0865138	0.357	0.202	0.000429671	other
Mien1	2.49207e-06	0.0864308	0.601	0.4	0.0412188	other
Tpp2	1.6039e-08	0.0864201	0.346	0.189	0.000273128	other
Rit2	3.74897e-05	0.0863963	0.774	0.559	0.599835	other
Mapk9	8.49242e-05	0.0863054	0.724	0.549	1	other
Ndufab1	8.44728e-05	0.0862438	0.722	0.541	1	other
Arfgef1	6.09016e-08	0.086104	0.517	0.318	0.00103161	other
Nxn	6.11737e-09	0.0860988	0.142	0.055	0.000104479	other
Fam107a	2.68044e-10	0.0858915	0.307	0.153	4.6133e-06	other
Cox8a	2.05164e-05	0.0857854	0.989	0.969	0.331155	other
Fkbp5	2.93655e-13	0.0857618	0.302	0.13	5.09726e-09	other
Mapk10	8.74572e-06	0.0857567	0.671	0.477	0.142695	other
Dlat	1.03525e-07	0.0856518	0.497	0.306	0.00174946	other
Spcs1	1.65498e-05	0.0853463	0.587	0.394	0.267991	other
Zc3h14	2.64926e-09	0.0853283	0.445	0.252	4.53448e-05	other
Mrps36	4.30367e-07	0.0851905	0.411	0.248	0.00721166	other
Srebf2	9.17163e-06	0.0850084	0.661	0.453	0.14958	other
Tbc1d30	1.10116e-08	0.085004	0.338	0.183	0.000187791	other
Mrpl33	7.72761e-08	0.0847688	0.594	0.373	0.00130736	other
Ids	0.000683359	0.0847509	0.892	0.748	1	other
Gucy1b1	2.25642e-07	0.0847499	0.449	0.276	0.00379665	other
Dcaf12l1	1.7352e-05	0.0846512	0.695	0.501	0.280738	other
Sphkap	4.81753e-09	0.0845967	0.463	0.27	8.23364e-05	other
Tspan17	3.47089e-09	0.0843712	0.447	0.257	5.93592e-05	other
Tnr	2.26302e-08	0.0843449	0.289	0.152	0.000384895	other
Reln	0.00529072	0.0843396	0.122	0.08	1	other
Rpl29	5.31556e-05	0.0841977	0.995	0.962	0.845226	other
Slitrk2	1.18149e-07	0.084185	0.363	0.21	0.00199459	other
Snhg12	0.000475827	0.0840915	0.772	0.562	1	other
Zfhx4	0.000519911	0.0838309	0.628	0.485	1	other
Sema6d	2.33328e-07	0.083727	0.312	0.179	0.00392528	other
2610021A01Rik	6.27154e-11	0.0835019	0.133	0.042	1.08159e-06	other
Bzw1	1.81768e-07	0.0834827	0.51	0.317	0.00306207	other
Rps12-ps3	2.36916e-09	0.0834294	0.129	0.046	4.05647e-05	other
Pitpnc1	3.4863e-06	0.0834131	0.564	0.374	0.0574508	other
Pde12	1.00106e-09	0.083326	0.192	0.082	1.71801e-05	other
2810001G20Rik	2.29686e-08	0.0832861	0.318	0.173	0.000390627	other
Spcs3	5.75458e-09	0.0832712	0.348	0.186	9.83112e-05	other
Dapk1	1.40087e-08	0.0832443	0.539	0.322	0.000238638	other
Ssx2ip	1.80026e-06	0.0831887	0.61	0.398	0.0298645	other
Tmem178b	3.33939e-06	0.0831611	0.562	0.376	0.0550698	other
1190002N15Rik	1.09479e-05	0.0830003	0.232	0.136	0.178189	other
Mpc1	9.6005e-08	0.0829317	0.544	0.343	0.00162316	other
Nuak1	2.74118e-07	0.0828662	0.343	0.2	0.00460682	other
Trp53i11	2.78518e-05	0.0828462	0.35	0.229	0.44755	other
Ntng1	4.26874e-07	0.0825689	0.824	0.626	0.00715399	other
Ndufaf4	1.49055e-08	0.0824718	0.488	0.288	0.000253841	other
Gm15446	1.8681e-09	0.082399	0.133	0.048	3.20099e-05	other
Armc8	9.7691e-07	0.0823565	0.531	0.346	0.0162783	other
Gnptab	4.93466e-07	0.082346	0.343	0.203	0.00826309	other
Tnpo3	2.44766e-07	0.0823205	0.549	0.348	0.00411623	other
Trhr	2.3841e-05	0.0823148	0.251	0.154	0.383887	other
Ipo5	1.39393e-06	0.0822973	0.53	0.349	0.0231643	other
Amotl1	4.33995e-06	0.0822854	0.627	0.419	0.0713618	other
Ncbp2	2.42811e-07	0.0821398	0.49	0.302	0.00408384	other
Cdc42	6.11794e-05	0.0821207	0.876	0.699	0.970061	other
Mthfd2l	3.29231e-08	0.0820285	0.379	0.217	0.0005591	other
Snrpe	1.30507e-06	0.0819518	0.655	0.439	0.0216968	other
Ttc3	1.1568e-06	0.0818285	1	0.996	0.0192492	other
Nars	0.000116707	0.0816846	0.756	0.562	1	other
Sept8	1.0829e-07	0.0816619	0.628	0.393	0.00182945	other
Tfrc	4.01695e-07	0.0815802	0.373	0.227	0.00673482	other
Epha10	1.60426e-08	0.0815487	0.269	0.138	0.000273174	other
Mpped1	3.44387e-06	0.0815034	0.205	0.113	0.0567584	other
Cnih1	4.21766e-06	0.0814129	0.539	0.354	0.0693805	other
Snx16	3.06198e-07	0.0813675	0.47	0.292	0.0051426	other
Zfp329	1.24563e-05	0.0810899	0.521	0.354	0.20239	other
Lrrc55	9.61757e-11	0.0810627	0.25	0.113	1.65797e-06	other
Kcnh1	8.805e-06	0.081037	0.332	0.212	0.143654	other
Rcn1	1.64223e-07	0.0810241	0.443	0.276	0.00276831	other
Anks1b	0.00124639	0.0810038	0.794	0.627	1	other
Rapgef4	2.12725e-07	0.0809748	0.345	0.2	0.00358144	other
Jmjd1c	1.3784e-08	0.0809024	0.567	0.344	0.000234837	other
Taf9b	5.11324e-09	0.0808932	0.255	0.126	8.73751e-05	other
Pak1ip1	4.28543e-08	0.080858	0.338	0.191	0.000726767	other
Kdm7a	4.23504e-10	0.0808144	0.357	0.186	7.28215e-06	other
Rps27a	1.8545e-05	0.0806988	1	0.998	0.299687	other
Nhs	2.76403e-10	0.0806665	0.332	0.168	4.75689e-06	other
Rgs19	1.26186e-08	0.0805475	0.287	0.149	0.000215058	other
Lyrm9	4.97723e-07	0.0804909	0.6	0.392	0.00833338	other
Znrf2	1.08995e-08	0.0804854	0.257	0.129	0.000185891	other
Ctps	1.30262e-09	0.080397	0.336	0.175	2.23438e-05	other
Dstn	1.34449e-05	0.0803213	0.758	0.546	0.218223	other
Bcl2l2	6.78761e-08	0.0803073	0.443	0.264	0.00114914	other
Robo2	2.35566e-08	0.0802854	0.214	0.103	0.000400604	other
Spock1	6.15926e-05	0.0802465	0.776	0.626	0.976551	other
Tmem150c	2.48688e-08	0.0802204	0.372	0.21	0.000422819	other
Cdh8	7.77457e-06	0.0801997	0.3	0.185	0.127075	other
Ppm1m	6.75801e-09	0.0801939	0.269	0.137	0.000115373	other
Fktn	5.77477e-07	0.0801458	0.436	0.271	0.00966293	other
Txndc15	6.09207e-07	0.0801416	0.434	0.269	0.0101896	other
Lrrtm2	1.32838e-08	0.0799697	0.485	0.287	0.000226342	other
Cbx5	0.000691986	0.0798246	0.923	0.79	1	other
Med30	2.70339e-09	0.0797802	0.203	0.09	4.62686e-05	other
Sfpq	6.92564e-07	0.0796271	0.655	0.44	0.0115727	other
Zfp62	4.51158e-10	0.0796251	0.172	0.068	7.75721e-06	other
Rpl28	0.00011109	0.0796005	0.982	0.919	1	other
Aff4	0.000434839	0.0795894	0.892	0.731	1	other
Nkrf	9.07211e-10	0.0794512	0.23	0.105	1.55759e-05	other
Fam161b	1.47014e-09	0.079446	0.206	0.091	2.52114e-05	other
Snx2	7.41765e-08	0.0794417	0.364	0.209	0.00125529	other
Kcnc1	0.000180084	0.0793741	0.725	0.532	1	other
Agfg2	4.14794e-08	0.0793261	0.296	0.158	0.000703532	other
Gria3	1.17133e-07	0.0792446	0.551	0.35	0.00197768	other
Nrxn1	0.000308497	0.0791991	0.975	0.853	1	other
Ggnbp2	6.65908e-05	0.0791862	0.772	0.592	1	other
Atxn10	1.54976e-06	0.0791194	0.641	0.433	0.0257275	other
Cisd1	2.07794e-06	0.0788439	0.621	0.418	0.0344294	other
Mrps12	2.14975e-06	0.0788022	0.587	0.389	0.0356063	other
Foxj3	1.31156e-05	0.0787744	0.612	0.419	0.212932	other
Nampt	1.1481e-08	0.0787602	0.329	0.178	0.000195751	other
Disp3	3.55125e-10	0.0786271	0.253	0.117	6.10922e-06	other
Ikzf2	6.59634e-07	0.0785086	0.232	0.125	0.0110278	other
Me1	2.29893e-07	0.0784915	0.271	0.148	0.00386772	other
Cbx4	2.06163e-08	0.078473	0.284	0.151	0.000350744	other
Ppp2r2b	2.21903e-06	0.0782189	0.641	0.432	0.0367494	other
Cct2	5.13703e-06	0.0781359	0.745	0.516	0.0843294	other
Chmp2b	1.21038e-06	0.0781141	0.343	0.206	0.0201334	other
Gm14296	2.08033e-09	0.0780221	0.26	0.128	3.56382e-05	other
Rab3c	0.000423149	0.0780161	0.914	0.774	1	other
Mmgt1	1.62562e-10	0.0779079	0.183	0.072	2.79949e-06	other
Rps7	4.15746e-05	0.0778964	0.998	0.995	0.663946	other
Emb	2.62088e-06	0.0778706	0.359	0.222	0.0433336	other
Sept7	0.000269773	0.0777418	0.824	0.636	1	other
Psmc6	2.21862e-07	0.0776816	0.549	0.344	0.00373417	other
Hspe1	2.90671e-05	0.0776716	0.907	0.711	0.466701	other
Hs6st2	0.000151602	0.0776333	0.427	0.299	1	other
Rassf5	4.974e-08	0.077603	0.28	0.149	0.000843292	other
E130307A14Rik	9.39635e-08	0.0775654	0.364	0.21	0.00158892	other
Atp6v1h	4.07921e-07	0.0775348	0.539	0.339	0.00683758	other
Nefm	5.34441e-08	0.077514	0.26	0.137	0.00090577	other
Cox7a2	0.000422657	0.0775119	0.896	0.731	1	other
Sipa1l1	1.49094e-06	0.0775021	0.478	0.307	0.02476	other
Phf20	2.6867e-06	0.0772974	0.487	0.322	0.0444112	other
Kcnma1	0.0001201	0.0772932	0.632	0.456	1	other
Fgf13	0.000152799	0.0771257	0.382	0.267	1	other
Slc12a5	0.00171908	0.0770694	0.926	0.822	1	other
Dmtf1	8.56609e-09	0.0770492	0.361	0.198	0.00014618	other
Rps13	0.000117142	0.0769529	0.998	0.982	1	other
Hpgds	4.00009e-06	0.0768364	0.117	0.052	0.0658334	other
Prkar1b	0.000169383	0.0766162	0.987	0.931	1	other
Rdh14	9.40853e-11	0.0765547	0.284	0.133	1.62203e-06	other
Galnt17	1.10624e-06	0.076501	0.458	0.293	0.0184155	other
Sos1	2.8965e-06	0.0764525	0.601	0.394	0.0478472	other
Mob4	0.000254799	0.0762216	0.731	0.536	1	other
Cct4	2.43824e-06	0.0759411	0.58	0.383	0.0403432	other
Rack1	0.00170919	0.0759233	0.871	0.693	1	other
Pnrc1	1.64615e-08	0.0758975	0.341	0.185	0.000280258	other
Nemf	3.9041e-08	0.0758442	0.434	0.255	0.000662409	other
Atp5g1	0.00598564	0.0757937	0.833	0.655	1	other
Gabrb1	0.00231291	0.0757065	0.914	0.82	1	other
Hras	0.000109408	0.0756734	0.867	0.682	1	other
Fam19a2	2.53616e-06	0.0756342	0.284	0.167	0.041938	other
Tmem246	9.76198e-06	0.0755149	0.492	0.325	0.159101	other
Srsf12	6.96736e-08	0.0755098	0.395	0.23	0.0011795	other
Klhl12	2.25459e-07	0.0754611	0.309	0.174	0.00379402	other
Dgkd	3.79615e-08	0.0753328	0.348	0.193	0.000644245	other
Iqsec3	8.15327e-06	0.0753155	0.688	0.486	0.133175	other
Unc5b	8.52514e-07	0.0751508	0.151	0.071	0.0142225	other
Yae1d1	1.27637e-06	0.0749471	0.368	0.219	0.0212223	other
Rpl5	2.90944e-05	0.0749342	0.959	0.865	0.467111	other
Lsm12	5.07661e-10	0.0747305	0.309	0.153	8.72568e-06	other
Mrps21	2.84198e-06	0.0746783	0.582	0.377	0.0469523	other
Abca1	4.48655e-06	0.074669	0.083	0.031	0.0737544	other
Pde4b	2.69741e-07	0.0745648	0.323	0.186	0.00453462	other
Lrrfip1	1.05479e-08	0.074428	0.276	0.143	0.000179915	other
Map9	2.40318e-06	0.074387	0.671	0.453	0.0397751	other
Dcun1d5	8.01664e-06	0.0740242	0.533	0.359	0.13096	other
Hecw1	7.97977e-06	0.0739413	0.501	0.333	0.130373	other
Sdhaf3	5.03578e-08	0.0738961	0.253	0.132	0.000853715	other
Tfg	1.07822e-06	0.0738129	0.311	0.182	0.0179546	other
Gng4	6.8e-05	0.0737135	0.524	0.374	1	other
Vps13d	5.39679e-08	0.0735208	0.348	0.193	0.000914594	other
Tnfrsf19	9.19814e-12	0.0734272	0.113	0.029	1.59063e-07	other
Fahd1	8.55217e-08	0.0733965	0.147	0.063	0.00144651	other
Ppp3cb	0.000756034	0.0732658	0.84	0.658	1	other
Glud1	7.89108e-06	0.073089	0.679	0.469	0.12894	other
Nipa2	5.12327e-08	0.0730874	0.255	0.132	0.000868497	other
Tuba1a	5.24339e-05	0.0730618	0.928	0.76	0.834171	other
Atp5g3	0.000296541	0.0730528	0.743	0.56	1	other
Lgi2	1.80128e-07	0.0728511	0.219	0.111	0.00303461	other
Dhx9	1.17771e-07	0.0728195	0.456	0.273	0.00198833	other
Wbp4	8.67328e-05	0.0728048	0.752	0.552	1	other
Gprasp1	0.00014352	0.0727282	0.977	0.888	1	other
Cab39	0.00011283	0.0725993	0.792	0.577	1	other
Mrps2	6.66712e-09	0.0725593	0.212	0.099	0.000113834	other
Sms	0.00173992	0.0725579	0.882	0.725	1	other
Gclc	1.89403e-05	0.0723573	0.442	0.296	0.305943	other
Sdha	0.000356936	0.0723494	0.822	0.644	1	other
Eid1	0.000178905	0.0722611	0.955	0.825	1	other
Vps13b	1.67295e-07	0.0721942	0.302	0.167	0.00281943	other
Plcl1	2.49683e-08	0.0720934	0.224	0.11	0.000424486	other
Ube2f	2.47941e-08	0.0719427	0.334	0.184	0.000421574	other
Samd5	1.68673e-07	0.071938	0.411	0.244	0.00284248	other
Ngb	0.000175576	0.071925	0.772	0.583	1	other
Btbd1	1.70782e-07	0.0719207	0.549	0.345	0.00287784	other
Fads1	3.01564e-06	0.0719037	0.341	0.207	0.0498003	other
Aldh9a1	4.74448e-07	0.0718986	0.223	0.117	0.007947	other
Gorasp2	1.01808e-07	0.0718582	0.506	0.306	0.00172056	other
Zfp943	3.09676e-08	0.0717011	0.149	0.061	0.000525954	other
Thy1	0.00385416	0.0716882	0.847	0.74	1	other
Slc35a2	7.22296e-10	0.0716391	0.287	0.139	1.24069e-05	other
Fndc9	1.35473e-05	0.0716326	0.44	0.288	0.219845	other
Cep83	4.24452e-08	0.0716015	0.224	0.111	0.000719871	other
Fbxo11	7.77572e-06	0.0715491	0.652	0.429	0.127086	other
Ptpn5	8.2223e-05	0.0715142	0.729	0.537	1	other
D430041D05Rik	3.59048e-06	0.0714895	0.47	0.304	0.0591459	other
Ak4	6.66031e-08	0.0714586	0.409	0.239	0.00112766	other
Mpp5	2.16861e-06	0.0714566	0.399	0.249	0.0359166	other
Wdr7	0.000125984	0.071447	0.625	0.441	1	other
Myo5a	0.000146399	0.0713574	0.777	0.576	1	other
Eif1	1.21197e-05	0.0713296	0.998	0.992	0.19697	other
Uba3	9.81911e-10	0.0712005	0.4	0.216	1.68525e-05	other
Mff	2.93673e-05	0.0711842	0.774	0.558	0.471404	other
Prdx1	2.25584e-07	0.0711479	0.555	0.343	0.00379589	other
Gtf2a2	2.73764e-07	0.0711332	0.49	0.3	0.00460143	other
Wwp1	1.12003e-06	0.0710724	0.237	0.13	0.0186418	other
Tmem237	3.31229e-08	0.0708676	0.391	0.22	0.000562459	other
Atrnl1	4.72661e-08	0.0707518	0.16	0.07	0.000801445	other
Pik3ca	1.28011e-05	0.070691	0.592	0.401	0.207915	other
Hnrnpu	0.000287605	0.0706876	0.899	0.725	1	other
Gpatch2	1.15428e-07	0.0706678	0.282	0.153	0.00194912	other
Ppa2	1.74034e-08	0.0705767	0.217	0.103	0.000296224	other
Dhx40	1.10722e-08	0.0704348	0.232	0.11	0.000188814	other
Abcb7	2.01686e-06	0.0704216	0.244	0.137	0.0334254	other
Arl4c	2.50512e-05	0.0703994	0.664	0.471	0.403149	other
Lingo2	2.38613e-05	0.0703587	0.711	0.509	0.384191	other
AC165953.2	1.73141e-05	0.0702456	0.271	0.164	0.280176	other
Prrt1	4.39442e-06	0.0702118	0.582	0.391	0.0722487	other
Ptpro	0.000148588	0.0701022	0.722	0.527	1	other
Gnl1	5.7544e-06	0.0700739	0.528	0.342	0.0943492	other
Slc35f4	1.6646e-06	0.0699999	0.232	0.129	0.0276257	other
Tax1bp1	3.93606e-07	0.0699986	0.469	0.285	0.00660078	other
Smoc1	2.8392e-08	0.0699558	0.165	0.072	0.00048238	other
Tmem29	1.11687e-05	0.069802	0.551	0.372	0.181704	other
Nyap1	5.54525e-06	0.0696054	0.639	0.439	0.0909698	other
Copg1	0.00452659	0.0695986	0.763	0.609	1	other
Galnt16	9.70663e-05	0.0695368	0.817	0.633	1	other
Ndfip2	4.54233e-06	0.0695019	0.567	0.373	0.0746622	other
Zfp322a	1.32623e-06	0.0694327	0.524	0.331	0.022046	other
Gm10036	9.7513e-08	0.0693286	0.138	0.058	0.00164846	other
Csrnp3	3.22831e-05	0.0693113	0.77	0.542	0.517499	other
Osbpl2	1.0358e-08	0.069292	0.427	0.243	0.000176686	other
Rtraf	0.000219385	0.0692918	0.842	0.675	1	other
Fam168a	1.99498e-05	0.0691865	0.698	0.496	0.322129	other
Myrip	7.78048e-08	0.069068	0.176	0.081	0.00131615	other
Nbdy	0.000149772	0.0690003	0.738	0.538	1	other
Htatsf1	4.88583e-07	0.0689949	0.334	0.194	0.0081823	other
Lamb3	2.05844e-07	0.0689832	0.108	0.041	0.0034658	other
Abi1	3.17708e-07	0.0689557	0.461	0.278	0.00533496	other
Megf9	4.67794e-06	0.0688948	0.364	0.227	0.0768538	other
Slc7a3	4.88066e-07	0.0688384	0.224	0.119	0.00817412	other
Nsdhl	3.43632e-08	0.0687318	0.154	0.065	0.000583418	other
Arf2	1.96501e-06	0.0686876	0.323	0.192	0.0325779	other
Lsm5	6.04295e-09	0.0685955	0.384	0.21	0.000103214	other
Plxna2	3.24749e-05	0.0685454	0.576	0.395	0.520475	other
Mis12	3.50248e-09	0.0685448	0.192	0.084	5.98959e-05	other
Arcn1	0.000224885	0.0685402	0.576	0.42	1	other
Coprs	2.26726e-06	0.0684985	0.618	0.405	0.0375367	other
Mad2l1	1.17417e-09	0.0684935	0.106	0.032	2.0144e-05	other
D3Ertd751e	1.05035e-07	0.0684738	0.305	0.166	0.00177478	other
Sc5d	2.70028e-07	0.068433	0.424	0.252	0.00453917	other
Tmem70	5.87476e-09	0.0684289	0.314	0.164	0.000100347	other
Ap3s1	4.48851e-06	0.068426	0.589	0.388	0.0737822	other
2610008E11Rik	2.43219e-07	0.0684056	0.235	0.124	0.00409047	other
Oxr1	1.09058e-06	0.068389	0.517	0.327	0.018157	other
H3f3a	0.000316846	0.0683341	0.738	0.544	1	other
Sacm1l	3.44273e-06	0.0682384	0.422	0.266	0.0567466	other
Taf1	1.13403e-05	0.0682162	0.474	0.316	0.184461	other
Pdia6	6.66618e-07	0.0681667	0.504	0.317	0.0111419	other
Tmem167	1.6029e-07	0.0681113	0.497	0.306	0.00270217	other
Slc39a6	6.49688e-05	0.0680991	0.515	0.357	1	other
Tsr1	1.03743e-07	0.0680802	0.196	0.094	0.00175305	other
Tigd2	3.36658e-05	0.0680457	0.438	0.294	0.539259	other
Rab40b	2.65881e-08	0.0679946	0.185	0.083	0.000451865	other
Phf3	0.000116677	0.0679853	0.65	0.445	1	other
Ndufa1	1.68029e-05	0.0679532	0.619	0.41	0.272022	other
Gabrq	0.000108552	0.0679062	0.745	0.571	1	other
Poglut1	3.60463e-06	0.0678198	0.467	0.303	0.0593754	other
Pkp4	1.76573e-05	0.0677116	0.623	0.424	0.285553	other
Tmeff1	1.94626e-07	0.0676788	0.479	0.29	0.0032777	other
Glrx5	7.81989e-06	0.0676409	0.646	0.448	0.1278	other
Efcab1	2.91329e-07	0.0674751	0.23	0.119	0.00489432	other
Sv2a	0.000105792	0.0674679	0.989	0.928	1	other
Eapp	1.25475e-08	0.0674303	0.339	0.184	0.00021386	other
Phlda3	7.56968e-06	0.0674148	0.454	0.29	0.123749	other
Mrpl51	5.71649e-07	0.0673649	0.492	0.307	0.00956597	other
Mrpl35	3.66479e-07	0.0673501	0.224	0.117	0.00614843	other
Ddx3x	0.00109077	0.0673125	0.824	0.632	1	other
Ccdc97	6.54357e-08	0.0672429	0.282	0.151	0.00110796	other
Rgs7bp	2.53498e-06	0.0672137	0.312	0.185	0.0419209	other
Ufm1	1.06769e-08	0.0671646	0.278	0.142	0.000182105	other
Dbndd2	1.82619e-05	0.0670363	0.429	0.276	0.295185	other
Gdpd2	9.5954e-10	0.0670119	0.206	0.089	1.64715e-05	other
Marcksl1	0.000585093	0.067005	0.948	0.825	1	other
Cplx1	0.000528882	0.0670037	0.397	0.282	1	other
Ypel5	3.45856e-05	0.0669766	0.519	0.346	0.553749	other
Lrrc3b	2.88533e-07	0.0669764	0.291	0.163	0.00484764	other
Psmd12	2.10741e-06	0.0669549	0.539	0.354	0.0349134	other
Fbxl17	9.79913e-08	0.0669232	0.339	0.191	0.00165644	other
Fam81a	2.7088e-06	0.0669186	0.294	0.174	0.044771	other
Clvs2	5.78321e-07	0.0668895	0.291	0.164	0.00967647	other
Nyap2	5.17794e-09	0.0667857	0.271	0.135	8.84703e-05	other
Synpo2	5.15699e-11	0.0667169	0.081	0.015	8.89581e-07	other
Nipa1	3.00332e-09	0.0666788	0.215	0.098	5.13869e-05	other
Zfp40	4.00662e-08	0.0666507	0.149	0.062	0.000679723	other
Tmem184c	6.07685e-08	0.0666235	0.329	0.183	0.00102948	other
Slco3a1	1.52103e-05	0.0666137	0.293	0.18	0.246543	other
Lss	2.95911e-07	0.0666094	0.142	0.062	0.004971	other
Kif2a	3.7753e-06	0.0665644	0.557	0.364	0.0621565	other
Sh3gl3	0.000427763	0.0665584	0.53	0.373	1	other
Nop58	6.97028e-07	0.0665502	0.438	0.269	0.0116466	other
Cul4a	1.21701e-06	0.0663263	0.406	0.246	0.0202426	other
D430036J16Rik	2.71374e-08	0.0662961	0.093	0.029	0.000461146	other
Adcy3	5.15675e-08	0.0662905	0.406	0.231	0.000874121	other
Slc36a4	2.10616e-05	0.0662653	0.571	0.391	0.339807	other
Cyth3	4.95471e-06	0.0662594	0.178	0.094	0.0813663	other
Tpi1	0.00349305	0.0662364	0.837	0.704	1	other
Mbnl1	1.43236e-05	0.0661983	0.618	0.42	0.232286	other
Nectin3	6.70594e-09	0.0661898	0.244	0.12	0.000114491	other
Csgalnact1	1.93743e-08	0.0659621	0.079	0.021	0.000329674	other
Snrpb2	2.58695e-05	0.0659543	0.467	0.315	0.416111	other
Trp53inp2	3.80892e-08	0.0659347	0.384	0.215	0.000646373	other
Cdc5l	2.12884e-07	0.0659087	0.26	0.14	0.00358389	other
1110051M20Rik	9.38767e-07	0.0659056	0.44	0.269	0.0156483	other
Oprl1	0.00068244	0.065904	0.618	0.457	1	other
Spag9	0.00281815	0.0658152	0.835	0.686	1	other
Spg20	1.28571e-07	0.0657825	0.312	0.173	0.00216964	other
Gpc1	5.1569e-08	0.065775	0.314	0.17	0.000874095	other
Tmem179	0.00223062	0.0656842	0.831	0.663	1	other
Lrrcc1	5.45994e-08	0.0655552	0.334	0.184	0.000925242	other
Stt3b	2.40537e-06	0.0654469	0.285	0.167	0.0398089	other
Mef2c	0.00147464	0.0653472	0.226	0.155	1	other
Mthfd1l	8.39234e-11	0.0653152	0.113	0.032	1.44709e-06	other
Sgcb	5.70802e-07	0.0652624	0.338	0.196	0.00955237	other
Zfp248	3.94293e-07	0.0652517	0.16	0.074	0.0066119	other
Tcerg1l	1.56256e-05	0.0651694	0.25	0.149	0.253212	other
Mcfd2	5.87907e-05	0.0651656	0.557	0.379	0.932773	other
Sephs2	2.78929e-05	0.0651549	0.406	0.268	0.448182	other
Nudt10	1.67253e-05	0.065094	0.487	0.324	0.270799	other
Dync1li1	8.26314e-06	0.065029	0.589	0.396	0.13492	other
Adarb2	4.01218e-05	0.0650115	0.395	0.262	0.640986	other
Bcap29	6.0354e-06	0.0649532	0.438	0.276	0.0989142	other
Dnajc5	0.000511362	0.0649241	0.959	0.902	1	other
Usp14	1.86205e-05	0.0648001	0.634	0.432	0.300871	other
Phlda1	8.19178e-06	0.0646846	0.215	0.123	0.133788	other
Armc1	7.2186e-06	0.0645576	0.576	0.384	0.118082	other
Dtd1	2.74993e-05	0.0645054	0.465	0.308	0.441995	other
Klhl23	1.41336e-07	0.0644706	0.294	0.163	0.00238377	other
Ndufb2	0.0003349	0.0644518	0.772	0.581	1	other
Ywhag	3.46666e-05	0.06442	1	0.987	0.555012	other
5930430L01Rik	9.48139e-05	0.0643087	0.136	0.073	1	other
Mycbp2	0.000558508	0.0642977	0.964	0.871	1	other
Cklf	4.04615e-07	0.0642142	0.228	0.119	0.00678297	other
Dnm1l	0.000547192	0.0641791	0.84	0.652	1	other
Arhgap5	3.3032e-06	0.0640868	0.596	0.392	0.0544829	other
Adss	1.42011e-06	0.063952	0.449	0.281	0.0235937	other
Dnajb4	1.27091e-06	0.0639485	0.686	0.463	0.0211327	other
Tspan6	6.62242e-07	0.0639404	0.413	0.25	0.0110707	other
Psma3	0.00497132	0.0639345	0.853	0.663	1	other
Rab5a	0.000366426	0.0638197	0.725	0.534	1	other
Cnr1	0.0040538	0.0638166	0.63	0.525	1	other
Inpp4b	2.58229e-05	0.0638129	0.183	0.102	0.415388	other
Cspg5	0.000169891	0.0638085	0.808	0.609	1	other
Brinp3	3.21297e-06	0.0638012	0.436	0.281	0.0530141	other
Mapre1	9.15349e-06	0.0637245	0.668	0.464	0.149293	other
Rbfox1	4.58883e-07	0.0637021	0.345	0.201	0.00768767	other
Kcnk1	1.00723e-07	0.0636764	0.239	0.123	0.00170243	other
Ddx55	6.39789e-06	0.063575	0.447	0.284	0.104804	other
Tacr1	2.35177e-06	0.0635583	0.151	0.073	0.0389289	other
Atmin	1.13093e-05	0.063518	0.501	0.332	0.183969	other
Ndufv2	6.98106e-06	0.0634028	0.619	0.415	0.114231	other
Srp54a	6.08907e-06	0.0633166	0.348	0.212	0.0997755	other
Rwdd2a	1.57638e-07	0.0632838	0.384	0.222	0.00265778	other
Jak1	6.8634e-06	0.0631129	0.592	0.382	0.112347	other
Laptm4a	1.71604e-05	0.0630957	0.65	0.439	0.277741	other
Gm9844	5.94356e-07	0.0630213	0.212	0.11	0.00994239	other
Dnajc27	0.00011068	0.0629919	0.632	0.44	1	other
Tmem14c	5.86009e-06	0.0629822	0.219	0.123	0.0960645	other
Limch1	4.04671e-07	0.0628571	0.487	0.293	0.00678351	other
Rnd2	4.56344e-06	0.062819	0.625	0.407	0.0750048	other
Ggps1	3.23338e-05	0.062797	0.553	0.371	0.518279	other
Trappc2	1.27705e-06	0.0627547	0.425	0.261	0.0212322	other
Sdhaf4	9.71947e-08	0.06271	0.343	0.191	0.00164317	other
Atp5a1	0.000300777	0.0627036	0.91	0.755	1	other
Galnt14	9.50135e-07	0.0626995	0.21	0.11	0.0158359	other
Tmeff2	1.04087e-06	0.0626821	0.461	0.286	0.0173368	other
Serinc5	4.09356e-06	0.062599	0.172	0.089	0.0673554	other
Zfp946	9.58875e-08	0.0625634	0.149	0.064	0.00162127	other
Rmst	0.0109721	0.0624365	0.598	0.479	1	other
Phkb	2.24021e-07	0.0624313	0.224	0.115	0.00377006	other
Endod1	1.42164e-05	0.0624237	0.56	0.377	0.230591	other
Hk1	0.000303742	0.0623355	0.652	0.473	1	other
Ap3m1	1.29505e-07	0.0623026	0.264	0.139	0.00218527	other
Ppp1r7	2.21663e-07	0.0622772	0.33	0.191	0.00373103	other
Mthfd2	1.15164e-05	0.0622653	0.162	0.085	0.187245	other
Rala	1.11999e-06	0.0622361	0.485	0.297	0.0186422	other
Gdap1	0.00264526	0.0622361	0.758	0.596	1	other
Amigo2	1.03574e-06	0.0622293	0.276	0.156	0.0172544	other
Swi5	9.23053e-05	0.0621582	0.851	0.651	1	other
Ndufb5	0.000408688	0.0621401	0.916	0.755	1	other
Rnf14	0.00144595	0.0621217	0.88	0.704	1	other
Vamp4	2.54676e-05	0.0621216	0.668	0.46	0.409799	other
Klhl32	1.65446e-07	0.0620915	0.312	0.173	0.00278877	other
Slc36a1	1.50016e-07	0.0620826	0.199	0.097	0.00252956	other
Ubl5	0.00253802	0.0620558	0.849	0.664	1	other
Arl1	1.05852e-05	0.0617545	0.569	0.376	0.172358	other
Vps26b	1.94598e-07	0.0616374	0.449	0.272	0.00327742	other
Fam20b	0.000164741	0.0616352	0.592	0.412	1	other
Gabrg2	0.000287128	0.0615747	0.657	0.47	1	other
Dhcr7	1.24127e-08	0.0614948	0.284	0.146	0.000211586	other
Slc35e3	2.23523e-06	0.0614504	0.404	0.247	0.0370109	other
Pip5k1b	4.92759e-07	0.0614361	0.171	0.082	0.00825175	other
Sestd1	3.41317e-07	0.0614229	0.172	0.082	0.0057297	other
Mtmr6	1.93377e-06	0.0613549	0.655	0.43	0.0320639	other
Pdxp	0.000381283	0.0613417	0.889	0.706	1	other
Gskip	3.36433e-06	0.0612162	0.411	0.259	0.0554744	other
Sobp	5.31767e-05	0.0612085	0.68	0.471	0.845509	other
Med13l	4.03878e-06	0.0611593	0.463	0.296	0.0664582	other
Ppp2r2a	3.61249e-06	0.0609939	0.537	0.355	0.0595013	other
Zscan18	2.44907e-06	0.0609895	0.298	0.175	0.0405199	other
Rgs17	0.000337163	0.0609491	0.923	0.761	1	other
Tomm5	2.80283e-05	0.0609484	0.702	0.487	0.450303	other
Dscam	8.9123e-05	0.0609204	0.601	0.419	1	other
Nmd3	1.60245e-07	0.0609158	0.282	0.154	0.00270157	other
Pnpt1	6.90718e-07	0.0608748	0.205	0.106	0.0115426	other
Xkr4	3.50315e-08	0.0608496	0.124	0.046	0.00059473	other
Jakmip2	8.76147e-07	0.0607189	0.408	0.248	0.0146133	other
Opa1	1.47867e-05	0.0606625	0.492	0.315	0.239737	other
Bclaf1	0.000716378	0.060587	0.853	0.646	1	other
Sbds	6.12426e-06	0.0605019	0.314	0.188	0.100346	other
Mkl1	1.15188e-07	0.0604814	0.208	0.102	0.00194518	other
Eif4e	0.000258861	0.0603355	0.772	0.581	1	other
Ptp4a2	0.00106097	0.060307	0.817	0.62	1	other
Gabrg1	6.53544e-05	0.0602581	0.625	0.427	1	other
Dhx29	1.38471e-08	0.0602497	0.169	0.072	0.000235899	other
Emc4	1.00947e-05	0.0602211	0.397	0.25	0.164453	other
Cox6b1	0.000345533	0.0601879	0.925	0.761	1	other
1110008P14Rik	9.90895e-05	0.0601533	0.804	0.584	1	other
Arsb	1.17974e-06	0.0600415	0.42	0.256	0.0196273	other
Unc13c	5.16094e-05	0.0600216	0.104	0.05	0.821416	other
Haus2	3.75728e-07	0.059905	0.282	0.156	0.00630247	other
Rgs7	5.81403e-07	0.0598601	0.388	0.229	0.00972746	other
Radil	2.23392e-07	0.0598066	0.14	0.061	0.00375969	other
Mapre2	0.000314359	0.0596981	0.831	0.632	1	other
Cmpk2	2.45389e-07	0.059685	0.303	0.167	0.00412646	other
Rab10	0.00019193	0.0596776	0.774	0.575	1	other
Tipin	3.76828e-08	0.0595941	0.197	0.092	0.000639553	other
Gm10076	2.32267e-12	0.0595902	0.853	0.552	4.02356e-08	other
Scn3b	6.54939e-05	0.0595575	0.661	0.459	1	other
Dnaja2	0.000283468	0.0595255	0.632	0.452	1	other
Cldnd1	0.00116592	0.0594977	0.517	0.37	1	other
Tppp3	0.000441909	0.0594143	0.463	0.324	1	other
Dip2a	6.65259e-07	0.0593601	0.3	0.168	0.0111198	other
Ube2d3	0.00172267	0.0592619	0.894	0.757	1	other
App	0.00296488	0.0592354	0.984	0.939	1	other
Clptm1l	3.08206e-06	0.0592324	0.476	0.302	0.0508849	other
Tfam	2.95168e-08	0.0592306	0.318	0.171	0.000501402	other
Mrfap1	0.000300457	0.0592292	0.996	0.958	1	other
Lynx1	0.00010212	0.0591965	0.648	0.466	1	other
Pja1	0.000630381	0.0591765	0.698	0.511	1	other
Pcyox1	0.000684373	0.0591524	0.625	0.457	1	other
Setd6	7.60758e-07	0.0591357	0.189	0.095	0.0127024	other
Timm8a1	2.66853e-06	0.0591101	0.122	0.054	0.0441161	other
Naa50	9.61242e-05	0.0591035	0.625	0.433	1	other
Rnf168	9.04782e-09	0.0590067	0.269	0.135	0.000154383	other
Pdcd10	5.75378e-06	0.0590039	0.355	0.218	0.0943448	other
Pnmal1	0.000537273	0.0589458	0.856	0.679	1	other
1700001L19Rik	2.39049e-09	0.0589268	0.33	0.171	4.09252e-05	other
Crh	0.215455	0.0589136	0.031	0.021	1	other
Vps4a	5.59217e-05	0.0588646	0.467	0.31	0.888093	other
Kcnb1	5.1218e-05	0.0588117	0.515	0.347	0.815288	other
Trip11	0.000551728	0.0587861	0.427	0.301	1	other
Ube2z	1.59499e-05	0.0587274	0.575	0.382	0.258373	other
Arhgef7	5.49879e-05	0.0584774	0.549	0.374	0.873648	other
Adpgk	5.0443e-09	0.0584733	0.255	0.125	8.6202e-05	other
E2f6	1.57099e-05	0.0583704	0.314	0.193	0.254532	other
Kcnq5	7.89006e-06	0.0583491	0.165	0.085	0.128931	other
Cntnap1	2.26772e-05	0.058185	0.375	0.239	0.365556	other
Ttc39c	3.22675e-07	0.0581395	0.136	0.059	0.00541803	other
Tubb2a	0.000360041	0.0580775	0.724	0.516	1	other
Got2	0.00163601	0.0580248	0.734	0.571	1	other
Ston2	2.56774e-06	0.0579922	0.171	0.086	0.0424576	other
Ccny	5.54096e-06	0.0579729	0.32	0.193	0.0909049	other
Anapc10	1.15936e-06	0.0579675	0.174	0.087	0.0192905	other
Acp2	6.33367e-06	0.0579395	0.582	0.374	0.103758	other
Zfp397	1.53157e-07	0.0579106	0.284	0.153	0.00258238	other
Pcyt1a	7.4612e-08	0.05787	0.185	0.086	0.00126258	other
Nrxn3	0.000610209	0.0577993	0.998	0.992	1	other
Kcnip1	1.24926e-05	0.0577186	0.438	0.281	0.202956	other
Lsamp	0.00298606	0.0577101	0.946	0.873	1	other
Gpatch4	4.57194e-06	0.0576601	0.413	0.257	0.0751399	other
Mpc2	2.09605e-06	0.057652	0.434	0.266	0.0347273	other
Tmem41b	1.62291e-08	0.0575861	0.445	0.254	0.000276317	other
Sult4a1	0.00137661	0.0575773	0.84	0.677	1	other
Akap6	0.000450475	0.0575377	0.75	0.549	1	other
Chac2	2.7741e-07	0.0574335	0.163	0.075	0.00466188	other
Ncoa4	1.53429e-06	0.0573475	0.454	0.282	0.0254738	other
Rasgrp2	1.85921e-06	0.0571552	0.425	0.259	0.0308331	other
Taldo1	3.05256e-07	0.0571481	0.171	0.08	0.00512739	other
Cdc27	8.87192e-06	0.0568923	0.42	0.266	0.144736	other
Adarb1	1.41589e-05	0.0568682	0.458	0.295	0.229671	other
Rell2	7.74143e-05	0.0567951	0.555	0.382	1	other
2310057M21Rik	3.71016e-09	0.056787	0.262	0.127	6.34363e-05	other
Ivns1abp	3.73199e-06	0.0567852	0.364	0.222	0.0614547	other
Vdac3	0.00037996	0.0567773	0.677	0.486	1	other
Jph4	0.000335713	0.0567653	0.806	0.619	1	other
Syndig1	2.04705e-07	0.0567122	0.21	0.105	0.00344682	other
Scn8a	3.72803e-06	0.0567114	0.582	0.381	0.0613932	other
Rnf145	7.14457e-06	0.0566989	0.463	0.299	0.116885	other
Rerg	2.20137e-07	0.056672	0.153	0.068	0.00370557	other
Slc7a14	0.000731676	0.0565755	0.702	0.515	1	other
Mbd5	1.16796e-05	0.0565694	0.384	0.24	0.18984	other
Fasn	6.19135e-07	0.0565307	0.53	0.327	0.010355	other
Sema3a	9.9723e-07	0.0565122	0.126	0.055	0.0166158	other
Mrpl20	5.50364e-06	0.0564948	0.535	0.35	0.0902983	other
Tex2	1.8378e-06	0.0564713	0.517	0.33	0.0304799	other
Yeats4	8.0346e-05	0.0563975	0.395	0.259	1	other
Fuca2	7.20137e-07	0.0562799	0.32	0.184	0.0120299	other
Smad2	4.93321e-05	0.0562647	0.18	0.101	0.78586	other
Zrsr2	0.00235783	0.0562474	0.652	0.478	1	other
Chp1	0.00012657	0.0562257	0.788	0.568	1	other
Thoc1	5.81492e-06	0.0561686	0.241	0.137	0.0953298	other
Jagn1	9.64911e-06	0.0560953	0.293	0.175	0.15729	other
Sugp2	2.17033e-05	0.0560607	0.443	0.288	0.350032	other
Fam91a1	9.73099e-07	0.0560503	0.524	0.331	0.0162167	other
Mef2a	3.0312e-05	0.0560103	0.504	0.333	0.486326	other
Ppig	0.0021551	0.0559732	0.855	0.667	1	other
Usp51	3.03394e-08	0.0559192	0.251	0.124	0.000515314	other
Creg2	1.88063e-06	0.0558645	0.395	0.238	0.0311865	other
Magi3	0.000123111	0.0558349	0.355	0.231	1	other
Gm20604	2.8557e-06	0.0557717	0.494	0.314	0.0471762	other
Plcxd2	4.59594e-05	0.0557407	0.409	0.269	0.73296	other
Mrpl50	7.49527e-07	0.055676	0.32	0.184	0.0125179	other
Rev3l	8.33175e-06	0.0555698	0.456	0.295	0.135999	other
C330007P06Rik	7.97936e-07	0.055488	0.226	0.12	0.0133192	other
Apoo	1.43223e-07	0.0554492	0.196	0.094	0.00241546	other
Cdh6	7.53722e-05	0.0554369	0.122	0.063	1	other
Wdr75	1.97207e-07	0.055316	0.156	0.07	0.00332097	other
D930016D06Rik	9.58964e-06	0.0552624	0.282	0.167	0.15634	other
Mast4	0.000231275	0.0552448	0.526	0.378	1	other
Insig2	1.5277e-06	0.0552055	0.542	0.344	0.0253659	other
Zfp672	7.05937e-06	0.0551112	0.259	0.149	0.115505	other
Ercc5	3.43877e-06	0.055056	0.167	0.085	0.0566847	other
Krr1	2.76531e-06	0.0550098	0.325	0.193	0.0456967	other
Dock7	2.96516e-05	0.0549815	0.399	0.255	0.475849	other
Prkar2b	1.41029e-06	0.0548841	0.443	0.273	0.0234335	other
Gm34006	1.86019e-05	0.0548599	0.099	0.043	0.300588	other
Cbln4	3.08067e-05	0.0548573	0.255	0.156	0.49414	other
Rtn1	0.000458018	0.0548316	1	0.996	1	other
Gm6133	8.41054e-07	0.0548238	0.122	0.052	0.014033	other
Rb1cc1	1.00912e-05	0.0547884	0.551	0.361	0.164406	other
Net1	3.97455e-05	0.054773	0.068	0.026	0.635094	other
Gcsh	6.39284e-07	0.0547656	0.408	0.244	0.0106888	other
Med28	0.00104858	0.0547249	0.826	0.643	1	other
Slc24a2	4.5405e-05	0.0546595	0.417	0.269	0.724346	other
Clint1	2.35016e-05	0.0545888	0.359	0.224	0.378517	other
Cr1l	3.20154e-06	0.0545776	0.144	0.069	0.0528319	other
Syngr3	0.00192066	0.0545381	0.838	0.646	1	other
Col25a1	4.13234e-05	0.0545325	0.395	0.262	0.660059	other
Psma4	3.23635e-05	0.0545155	0.35	0.225	0.518723	other
Tmem127	2.69768e-06	0.0544127	0.361	0.216	0.0445899	other
Fam168b	0.00119563	0.054368	0.716	0.523	1	other
Cript	0.000591053	0.0543578	0.499	0.358	1	other
Aff3	3.5072e-07	0.0543395	0.259	0.139	0.00588543	other
Fzd3	0.000129077	0.0542929	0.549	0.377	1	other
Fmn2	8.22386e-07	0.0542739	0.483	0.288	0.0137223	other
C1qbp	9.48757e-07	0.0542422	0.44	0.269	0.0158139	other
Cdh12	6.28989e-05	0.0542145	0.172	0.097	0.996759	other
Cbln2	0.000200047	0.0542082	0.145	0.083	1	other
2310009B15Rik	3.54248e-06	0.054182	0.427	0.267	0.0583623	other
Ank	3.01852e-06	0.054146	0.391	0.24	0.0498448	other
Zadh2	1.17432e-06	0.0541409	0.136	0.061	0.0195384	other
Gm20300	3.16587e-06	0.05402	0.325	0.193	0.0522495	other
Ipcef1	2.06654e-08	0.0539401	0.228	0.11	0.00035156	other
Tlnrd1	2.38718e-07	0.0539297	0.278	0.151	0.00401548	other
Fam124a	6.2591e-07	0.0538603	0.221	0.115	0.0104671	other
Aven	2.73622e-07	0.0538602	0.099	0.035	0.00459932	other
Ano3	1.09535e-05	0.0538416	0.099	0.042	0.178269	other
Sema5a	0.000568972	0.0537774	0.194	0.123	1	other
Fndc3b	8.55254e-07	0.0537324	0.355	0.207	0.0142673	other
Snx25	5.62553e-06	0.053732	0.233	0.132	0.0922644	other
Gm2000	1.08809e-05	0.0536235	0.442	0.287	0.177119	other
Nalcn	6.2225e-05	0.0535942	0.679	0.463	0.986391	other
Fbn2	6.28588e-07	0.0535816	0.117	0.048	0.0105113	other
Coa4	9.0339e-07	0.0535774	0.086	0.03	0.015064	other
1110008F13Rik	3.85267e-05	0.0535082	0.321	0.2	0.616003	other
Ube2ql1	0.000352711	0.0534765	0.494	0.344	1	other
Eif5	0.0109966	0.0533923	0.896	0.748	1	other
Gmps	0.000754286	0.0533361	0.763	0.571	1	other
Ipmk	5.05741e-07	0.0533356	0.284	0.157	0.00846711	other
Chchd1	3.80487e-06	0.0532922	0.494	0.309	0.0626357	other
Ash1l	0.000227874	0.0532515	0.768	0.543	1	other
Dner	0.00180376	0.0532435	0.81	0.648	1	other
Nfasc	0.00166675	0.0530573	0.652	0.475	1	other
Ubxn2b	8.95078e-08	0.0530132	0.343	0.187	0.00151385	other
Rnf169	1.71217e-05	0.0529675	0.291	0.176	0.277131	other
Wdr17	8.2431e-06	0.0529524	0.126	0.06	0.13461	other
Kpna6	1.48485e-06	0.0529484	0.447	0.278	0.0246605	other
Gpr85	2.8719e-05	0.0529009	0.463	0.307	0.461227	other
Doc2b	4.12018e-06	0.0528774	0.341	0.203	0.0677851	other
Zfp850	1.14012e-07	0.0528662	0.086	0.027	0.00192543	other
Zfp65	1.0387e-06	0.0528275	0.099	0.038	0.0173016	other
Ctnnd2	2.84876e-05	0.0528077	0.58	0.385	0.457597	other
Hddc2	2.95274e-06	0.052786	0.285	0.165	0.0487705	other
Hpcal4	0.00414475	0.0527537	0.815	0.643	1	other
Mtmr4	1.07836e-07	0.0527511	0.517	0.311	0.00182188	other
Lmbrd2	3.93338e-06	0.0527369	0.567	0.373	0.0647395	other
Pnpla8	0.000297615	0.0526876	0.61	0.428	1	other
Gm32585	3.2095e-06	0.0526102	0.092	0.035	0.05296	other
Capn7	3.29535e-06	0.0526038	0.338	0.199	0.0543602	other
Slc1a2	3.93871e-05	0.052592	0.355	0.229	0.629484	other
Tmem64	4.10199e-06	0.0525835	0.417	0.256	0.0674901	other
Vwc2	7.33858e-07	0.0525779	0.172	0.084	0.0122576	other
Pabpc4	5.4468e-06	0.052572	0.199	0.107	0.089371	other
Arhgdia	0.00262264	0.0525573	0.815	0.646	1	other
Cygb	0.000121389	0.0525341	0.627	0.438	1	other
Prdm16	1.30257e-05	0.0525294	0.176	0.095	0.211512	other
Zmym4	0.000214134	0.0525247	0.54	0.373	1	other
Slc35f1	2.76522e-05	0.052504	0.35	0.22	0.444398	other
Srxn1	3.40797e-06	0.0525007	0.442	0.276	0.0561839	other
Commd10	6.89561e-06	0.0524575	0.131	0.062	0.11286	other
Atg10	3.07164e-07	0.0524395	0.162	0.074	0.00515851	other
Spred2	4.70428e-08	0.0523422	0.415	0.24	0.000797705	other
Gpr158	1.49229e-06	0.0522853	0.377	0.225	0.0247809	other
Etfbkmt	4.28317e-06	0.052274	0.092	0.036	0.0704497	other
Ccdc186	9.5614e-07	0.0522597	0.35	0.205	0.015935	other
Echdc1	1.41349e-05	0.0522434	0.149	0.076	0.229297	other
Aen	1.01232e-06	0.052196	0.223	0.118	0.0168652	other
Skiv2l2	6.56916e-07	0.0521475	0.212	0.108	0.010983	other
Cpsf7	8.76082e-07	0.0521123	0.406	0.245	0.014613	other
Mrpl13	2.57942e-07	0.0520837	0.291	0.162	0.00433678	other
Sf3b6	4.74987e-06	0.0520684	0.321	0.194	0.0780262	other
Kcnj6	3.39631e-08	0.0520261	0.113	0.04	0.00057666	other
Cmas	0.000729297	0.0520228	0.731	0.538	1	other
Uri1	2.29978e-05	0.0520094	0.478	0.31	0.370586	other
Cthrc1	0.000319733	0.0519995	0.18	0.108	1	other
Ttc39b	8.22262e-07	0.051985	0.296	0.168	0.0137211	other
Surf2	2.84336e-07	0.0518777	0.352	0.199	0.00477798	other
Cstb	5.81326e-06	0.0518756	0.192	0.102	0.0953084	other
Iars	4.00131e-06	0.0518749	0.259	0.147	0.0658496	other
Ift88	7.51416e-07	0.0518748	0.183	0.09	0.0125487	other
Eif5a2	1.66794e-06	0.0518395	0.303	0.175	0.0276794	other
Usp47	0.000242257	0.0518164	0.513	0.351	1	other
Akirin1	7.60276e-05	0.0518062	0.49	0.33	1	other
Pcnx4	1.55825e-05	0.0517948	0.345	0.215	0.252545	other
Ndufb3	0.000426286	0.0517901	0.747	0.556	1	other
Fpgt	1.73966e-05	0.0517882	0.145	0.074	0.281442	other
Spata24	5.6048e-07	0.0517498	0.102	0.039	0.0093802	other
Rsl1d1	5.80028e-05	0.0517491	0.377	0.241	0.920679	other
Sh3kbp1	0.000225174	0.0516476	0.312	0.207	1	other
Mib1	2.94024e-05	0.0515308	0.496	0.321	0.471909	other
St3gal1	1.1065e-05	0.0514857	0.117	0.053	0.180038	other
Dnajc19	4.28519e-07	0.0514087	0.49	0.291	0.00718113	other
Ubap1	2.93303e-06	0.0513659	0.237	0.131	0.0484478	other
Cyb5b	0.000378406	0.0512372	0.677	0.486	1	other
Dcdc2a	1.95097e-05	0.0511562	0.178	0.097	0.315062	other
Pnma2	0.000129852	0.0510732	0.661	0.459	1	other
Actr3	0.000426449	0.0510142	0.738	0.547	1	other
Mtx2	1.11199e-05	0.0510082	0.25	0.146	0.18092	other
Gpr68	1.99065e-06	0.050991	0.101	0.04	0.032997	other
Wdr35	7.66202e-07	0.0509118	0.325	0.184	0.0127917	other
Dyrk2	6.34607e-07	0.050889	0.273	0.149	0.0106113	other
Fam49b	0.000241045	0.0508541	0.616	0.444	1	other
Taf15	8.00765e-05	0.0508397	0.391	0.257	1	other
Gclm	2.06151e-05	0.0508161	0.384	0.242	0.332686	other
Ippk	9.28288e-07	0.0507662	0.12	0.051	0.0154755	other
Vps13c	4.03741e-06	0.0507479	0.384	0.231	0.0664396	other
Mysm1	9.08976e-08	0.0507368	0.359	0.203	0.00153717	other
Zfp292	0.000166263	0.0506936	0.521	0.358	1	other
Gm28884	2.12845e-06	0.0506021	0.05	0.012	0.0352577	other
B3galt6	1.75249e-07	0.0505511	0.242	0.127	0.00295276	other
Pip4k2b	9.17738e-06	0.0505479	0.573	0.368	0.149665	other
Uchl5	1.05704e-06	0.0505173	0.332	0.192	0.0176029	other
Zfx	8.70387e-06	0.0504803	0.189	0.102	0.14203	other
Usp9x	0.00290104	0.0503648	0.907	0.761	1	other
Stc1	7.4423e-05	0.0503408	0.208	0.125	1	other
Fam76a	0.000507294	0.0503279	0.575	0.401	1	other
Trpc5	0.000202547	0.0502123	0.409	0.283	1	other
Mtfr1l	7.39901e-06	0.050163	0.368	0.225	0.120981	other
Strip2	2.29464e-07	0.0501137	0.104	0.038	0.00386073	other
Gm14419	1.09064e-07	0.0500853	0.111	0.041	0.00184243	other
5031439G07Rik	8.56085e-07	0.0500031	0.533	0.326	0.0142804	other
Siae	3.90499e-06	0.0499629	0.142	0.068	0.0642762	other
Sgsm1	0.0019277	0.0499605	0.808	0.622	1	other
Cops7a	3.23436e-06	0.0498724	0.476	0.299	0.0533637	other
Pgrmc2	0.000861761	0.0498633	0.65	0.462	1	other
Fbxo25	1.57152e-06	0.0498311	0.503	0.315	0.0260872	other
Acaca	6.55804e-06	0.049803	0.496	0.316	0.107414	other
Mmadhc	1.2222e-05	0.0497889	0.23	0.131	0.19862	other
Spryd7	0.00157634	0.0497583	0.625	0.458	1	other
Xpot	1.25116e-06	0.0496823	0.488	0.299	0.020808	other
Plgrkt	1.79148e-05	0.0495908	0.194	0.108	0.289647	other
Gprin3	1.16539e-05	0.0495651	0.255	0.15	0.189445	other
Zfp746	3.32136e-05	0.0495508	0.226	0.13	0.532081	other
Mrpl17	0.000145664	0.0494754	0.408	0.27	1	other
Sowahc	1.46266e-06	0.0494734	0.145	0.068	0.0242962	other
Nudt19	5.19731e-06	0.0494608	0.571	0.376	0.0853086	other
Adgrl1	0.000960364	0.0494464	0.944	0.824	1	other
Igf1r	1.38759e-05	0.0494251	0.384	0.241	0.225151	other
Synj2bp	7.0961e-05	0.0493955	0.539	0.366	1	other
Nat8l	0.000196334	0.0493928	0.655	0.476	1	other
Vwa8	3.51441e-06	0.049376	0.131	0.061	0.0579035	other
H1f0	1.70561e-06	0.0493562	0.413	0.246	0.0282994	other
Txndc5	1.0904e-05	0.0493181	0.425	0.271	0.177485	other
Slc25a5	5.13214e-07	0.0492199	0.361	0.205	0.00859068	other
Tac2	0.0140072	0.0492029	0.09	0.057	1	other
Flrt2	3.105e-06	0.0491899	0.341	0.203	0.0512604	other
Rnf13	7.76046e-07	0.0490984	0.321	0.184	0.0129553	other
Scfd1	2.85579e-05	0.0490908	0.291	0.181	0.458698	other
Acsl6	8.24673e-06	0.0490893	0.363	0.222	0.134661	other
Cnot7	1.14783e-05	0.0490469	0.639	0.42	0.186637	other
Slmap	3.74536e-06	0.0490442	0.338	0.204	0.0616673	other
Usp33	0.00167798	0.0489572	0.551	0.397	1	other
Btbd10	4.96828e-07	0.0489521	0.325	0.184	0.00831889	other
Rpl10-ps3	4.27786e-06	0.0488798	0.496	0.312	0.0703666	other
Galnt11	6.74198e-06	0.0488434	0.284	0.166	0.11038	other
Drg1	0.000110805	0.0488367	0.338	0.221	1	other
Pou2f1	9.21043e-06	0.0488346	0.276	0.165	0.150195	other
Dcbld2	2.49965e-06	0.0486937	0.192	0.099	0.0413417	other
Ift81	1.43893e-06	0.0486733	0.364	0.213	0.023905	other
Mapk1	0.00222124	0.048661	0.917	0.808	1	other
Usp46	7.43485e-05	0.0486454	0.513	0.348	1	other
Scrn3	5.40746e-05	0.0486403	0.142	0.075	0.85957	other
Gsg1l	7.37094e-05	0.0485958	0.104	0.051	1	other
Trub1	1.47209e-05	0.0485924	0.214	0.12	0.238699	other
Fam149a	5.47527e-05	0.0485238	0.237	0.142	0.870021	other
Sptssa	1.31154e-06	0.0484794	0.569	0.354	0.021803	other
Rxfp1	9.88162e-06	0.0484707	0.045	0.011	0.161021	other
Lyrm2	1.90013e-06	0.0484432	0.244	0.133	0.0315079	other
Wipf2	1.32277e-05	0.0484328	0.521	0.343	0.214725	other
Slc16a7	2.13405e-06	0.0483918	0.129	0.058	0.0353484	other
Prpsap2	1.03698e-06	0.0483858	0.268	0.15	0.0172741	other
Bmpr2	0.000822959	0.0483554	0.677	0.488	1	other
Picalm	5.83109e-05	0.0483229	0.521	0.354	0.925335	other
Rnf112	0.000248498	0.0482985	0.724	0.516	1	other
Pfkfb3	4.00971e-05	0.0482722	0.174	0.097	0.640631	other
2010315B03Rik	3.80124e-06	0.0482619	0.201	0.108	0.0625797	other
Tro	0.0109165	0.0481108	0.831	0.665	1	other
Bbip1	7.35539e-07	0.0480652	0.411	0.25	0.012285	other
Ttll5	1.71503e-06	0.0479815	0.217	0.115	0.0284541	other
Mapt	0.0283206	0.0478652	0.986	0.946	1	other
Trnt1	9.33283e-07	0.047799	0.352	0.206	0.0155578	other
Adgrb3	0.000891012	0.047782	0.732	0.543	1	other
Mettl14	3.05783e-07	0.0476557	0.147	0.064	0.00513594	other
Zdhhc6	3.82517e-05	0.0476201	0.285	0.176	0.611759	other
Poc5	2.46959e-06	0.0475979	0.215	0.116	0.0408494	other
Rap1gap	0.000704921	0.0475977	0.668	0.484	1	other
Nacc2	5.25968e-05	0.0475831	0.219	0.13	0.836605	other
Spred3	1.58093e-05	0.0475491	0.264	0.156	0.256111	other
Efcab10	4.57896e-06	0.047549	0.102	0.042	0.0752461	other
Ss18l2	2.71476e-05	0.0475466	0.614	0.408	0.436425	other
Zdhhc13	3.33532e-06	0.0475394	0.144	0.068	0.0550061	other
Wdr82	0.000311896	0.0474498	0.671	0.474	1	other
Ehd3	0.000236513	0.0473439	0.496	0.346	1	other
Trp53inp1	0.000515653	0.0473367	0.144	0.084	1	other
Tsc22d1	0.0149731	0.0472808	0.917	0.775	1	other
Ncl	0.0077095	0.0472467	0.831	0.66	1	other
Tmem185a	9.65045e-06	0.0472262	0.294	0.176	0.157302	other
Zfp354c	3.57677e-07	0.0472082	0.309	0.174	0.0060011	other
Far2	5.56474e-06	0.0472032	0.138	0.066	0.0912728	other
Rpl27a	0.0161452	0.0471872	1	0.998	1	other
Invs	1.57832e-05	0.0471205	0.167	0.089	0.255703	other
Fam183b	2.9737e-08	0.0471124	0.287	0.149	0.000505113	other
Ing1	1.5655e-05	0.0471005	0.524	0.345	0.253674	other
Dst	0.00454737	0.0470365	0.871	0.68	1	other
Psma6	7.35798e-06	0.0470146	0.311	0.186	0.120325	other
Kif1bp	2.14852e-05	0.0470075	0.429	0.273	0.346557	other
Bbc3	9.45016e-06	0.0469992	0.124	0.058	0.154085	other
Gde1	1.20686e-05	0.0469892	0.623	0.412	0.196152	other
Lrrc59	2.5053e-06	0.0469866	0.32	0.189	0.0414326	other
Cops3	1.10527e-05	0.0469858	0.287	0.173	0.179849	other
Eif3e	0.00554534	0.0469597	0.794	0.608	1	other
Baalc	8.26652e-06	0.0468906	0.433	0.269	0.134967	other
Htr1d	9.47123e-08	0.046838	0.061	0.014	0.00160149	other
Timp2	0.00587099	0.0468134	0.961	0.895	1	other
Rdh11	6.81056e-06	0.0468056	0.144	0.071	0.111489	other
Calb2	0.000351568	0.0467848	0.535	0.388	1	other
G6pdx	2.1802e-05	0.046755	0.171	0.092	0.3516	other
Fam208b	2.45818e-06	0.0467439	0.208	0.111	0.0406632	other
Mrpl10	3.0514e-05	0.0466501	0.366	0.231	0.489506	other
Med21	6.84714e-07	0.0466404	0.359	0.21	0.0114429	other
Stum	1.98909e-06	0.0466257	0.321	0.188	0.0329732	other
Irak1bp1	1.28523e-05	0.0466005	0.39	0.248	0.208734	other
Mrpl18	0.000248792	0.0465815	0.623	0.44	1	other
Zfp942	2.73999e-07	0.0465543	0.246	0.127	0.0046051	other
Nr2c2ap	5.55171e-06	0.0464826	0.302	0.18	0.0910703	other
Pds5b	0.000677072	0.0464817	0.688	0.493	1	other
Tmem86a	3.31958e-07	0.0464649	0.106	0.04	0.00557357	other
Psmd5	7.07194e-05	0.0464596	0.429	0.284	1	other
Ppm1a	0.0107696	0.0464277	0.901	0.809	1	other
Chuk	0.000292993	0.046378	0.431	0.296	1	other
Lrp11	7.25494e-06	0.0463643	0.485	0.314	0.118669	other
Ltv1	8.99037e-07	0.0463471	0.083	0.028	0.0149923	other
Plaa	7.55607e-07	0.0463242	0.239	0.127	0.0126179	other
Gm26691	5.41593e-05	0.0462669	0.149	0.08	0.860808	other
Trove2	0.000234378	0.0461845	0.555	0.384	1	other
Prkag2	5.09182e-07	0.0461183	0.357	0.205	0.0085237	other
Zfp426	0.000494842	0.0460466	0.201	0.127	1	other
Brcc3	1.10249e-06	0.0459871	0.329	0.19	0.0183543	other
Pfkfb4	3.25465e-06	0.0459571	0.219	0.119	0.0536952	other
Map3k15	1.47464e-05	0.0459221	0.059	0.019	0.239099	other
Enoph1	1.08078e-05	0.0459175	0.257	0.147	0.175951	other
Mageh1	0.000172811	0.0458832	0.372	0.245	1	other
Pitpnm3	8.98077e-07	0.0458356	0.318	0.181	0.0149772	other
Hrh1	2.89924e-05	0.0458028	0.158	0.085	0.46553	other
Parp8	8.2681e-06	0.0457887	0.199	0.108	0.134985	other
Vat1l	0.00727682	0.0457719	0.885	0.727	1	other
Pcnx	3.34734e-06	0.0457482	0.32	0.187	0.0551977	other
Ppfia2	1.02363e-05	0.0456871	0.408	0.257	0.166718	other
Gfod1	5.6845e-06	0.0456538	0.251	0.144	0.0932202	other
Sntg1	6.16799e-08	0.0456279	0.26	0.131	0.00104473	other
Dlgap2	3.70107e-07	0.0456151	0.154	0.07	0.00620855	other
Fam169a	3.78883e-05	0.0456131	0.524	0.346	0.606023	other
Ubr5	0.000154445	0.045608	0.487	0.332	1	other
Rph3al	1.41604e-06	0.0456048	0.074	0.024	0.0235276	other
Mafk	1.01315e-05	0.0455688	0.16	0.082	0.165042	other
Grid2	0.000112677	0.0455463	0.53	0.372	1	other
Stat2	3.4243e-07	0.0455077	0.145	0.063	0.00574802	other
Tspan2	9.62475e-06	0.0455066	0.449	0.284	0.156903	other
Chmp5	0.000881304	0.0454899	0.564	0.392	1	other
Ankrd50	1.00714e-07	0.0454759	0.467	0.269	0.00170236	other
Garem1	6.76546e-07	0.0454525	0.113	0.045	0.0113071	other
Smarca5	0.0007201	0.0453843	0.686	0.496	1	other
Ncam2	3.9138e-05	0.0453834	0.397	0.259	0.625621	other
Kcnk2	0.00256845	0.0453732	0.781	0.622	1	other
Luzp1	1.1487e-06	0.0453673	0.32	0.187	0.0191155	other
Slc31a1	4.03076e-07	0.0453319	0.131	0.055	0.00675758	other
Stxbp5l	5.25072e-05	0.0452918	0.332	0.211	0.835233	other
Nudt11	6.44675e-05	0.0452868	0.616	0.428	1	other
Kcnab2	7.98667e-05	0.0452774	0.325	0.209	1	other
Sike1	1.5163e-05	0.0452141	0.282	0.171	0.245793	other
Pcdhb17	4.9725e-05	0.0451532	0.122	0.061	0.79202	other
BC035947	9.10857e-06	0.0451183	0.126	0.059	0.14857	other
Plekha8	5.23121e-05	0.0449456	0.127	0.065	0.83239	other
Acsl5	9.76751e-07	0.0449118	0.18	0.088	0.0162766	other
3632451O06Rik	2.27276e-06	0.0448891	0.187	0.094	0.0376256	other
Atg3	0.000140524	0.0448681	0.235	0.146	1	other
Ccng1	1.81861e-06	0.0448614	0.264	0.147	0.0301653	other
Pgm2	2.20942e-05	0.0448326	0.354	0.221	0.356269	other
Gmfb	0.000233292	0.0448294	0.654	0.467	1	other
St3gal2	1.7493e-05	0.0447372	0.348	0.214	0.282949	other
Fam45a	4.79811e-06	0.0447303	0.3	0.176	0.0788138	other
Fxr2	3.83476e-05	0.0447235	0.537	0.348	0.613217	other
Fam199x	7.3135e-06	0.0446475	0.409	0.255	0.119605	other
Yipf1	6.03515e-07	0.044591	0.187	0.091	0.010095	other
Ncor1	0.000961097	0.0444295	0.799	0.59	1	other
Zdhhc20	0.00653149	0.0443491	0.779	0.624	1	other
Cryz	7.72894e-08	0.0443323	0.057	0.012	0.0013075	other
Ccar1	0.000496913	0.0442885	0.469	0.321	1	other
Gspt2	4.39321e-06	0.0442141	0.282	0.163	0.0722331	other
Pkp2	3.55976e-06	0.044207	0.09	0.034	0.0586435	other
BC002059	2.04695e-05	0.0441676	0.092	0.039	0.330418	other
Ndufaf5	3.44423e-06	0.0441615	0.196	0.102	0.056761	other
Spopl	6.34465e-05	0.0440982	0.271	0.169	1	other
H3f3b	0.00121081	0.0440966	0.968	0.87	1	other
Klhl20	3.1496e-06	0.0440163	0.212	0.114	0.0519873	other
Xkr6	1.328e-06	0.0440081	0.203	0.105	0.0220739	other
Uqcrh	0.00851688	0.0439863	0.996	0.957	1	other
Lgalsl	2.2808e-05	0.0439817	0.341	0.215	0.367597	other
Uqcr11	0.00142696	0.0439466	0.835	0.636	1	other
Ube4b	0.000388256	0.0439325	0.589	0.42	1	other
2610037D02Rik	5.07723e-06	0.0439245	0.215	0.118	0.083358	other
Rab33a	3.65801e-08	0.0438703	0.095	0.03	0.000620911	other
Zfp944	7.26526e-05	0.0437807	0.118	0.06	1	other
Sfr1	0.00403889	0.0437199	0.591	0.439	1	other
Snx7	0.00015513	0.043588	0.095	0.046	1	other
Hnmt	2.84432e-05	0.0435321	0.118	0.057	0.456911	other
Bex3	0.0366661	0.0435216	0.944	0.803	1	other
Bdh1	3.60684e-05	0.0435207	0.232	0.138	0.577311	other
Txn1	5.50524e-05	0.0434656	0.544	0.363	0.874507	other
Coro1c	0.00342131	0.0433346	0.636	0.47	1	other
Gm26760	2.00848e-06	0.0433	0.063	0.018	0.0332886	other
Fam120a	0.000104614	0.0432483	0.388	0.259	1	other
Vps52	4.95142e-06	0.0432016	0.219	0.12	0.0813171	other
2010005H15Rik	0.000160334	0.0431655	0.163	0.094	1	other
Rpgrip1l	1.39709e-07	0.0431479	0.217	0.107	0.00235647	other
Stxbp1	0.0283488	0.0431365	0.991	0.947	1	other
Mark3	7.43085e-05	0.0430651	0.461	0.298	1	other
Vps41	0.000577926	0.0430556	0.539	0.375	1	other
D430042O09Rik	0.000608795	0.0430183	0.302	0.204	1	other
Tmem241	1.22877e-06	0.0429576	0.12	0.051	0.020437	other
Utrn	2.30058e-05	0.0429318	0.239	0.141	0.370692	other
Pag1	3.75888e-05	0.0429309	0.185	0.103	0.601383	other
B230334C09Rik	0.000108306	0.0429122	0.508	0.353	1	other
Sub1	0.00781057	0.0428782	0.962	0.836	1	other
Gadd45a	4.14865e-07	0.0428624	0.126	0.052	0.00695314	other
Pls3	3.01152e-05	0.0428478	0.341	0.215	0.483228	other
Fam192a	3.72637e-06	0.042813	0.284	0.165	0.0613695	other
Akap7	0.00029231	0.0427476	0.494	0.342	1	other
Bmp3	0.0129208	0.0427471	0.09	0.056	1	other
Erg28	1.16795e-05	0.0426815	0.422	0.263	0.189851	other
Phf10	1.8234e-05	0.0425513	0.417	0.262	0.294752	other
Dnajc3	1.87802e-05	0.0425316	0.314	0.196	0.303394	other
Scn5a	3.93122e-05	0.0425192	0.171	0.094	0.628327	other
Ppp2r1a	0.00353227	0.0424805	0.803	0.618	1	other
Cog8	8.55638e-06	0.0424783	0.246	0.143	0.139632	other
Ap3b2	5.28247e-05	0.0424759	0.458	0.301	0.840071	other
Itm2b	0.0101882	0.0424135	0.853	0.712	1	other
Hat1	1.65494e-07	0.042395	0.083	0.025	0.00278941	other
Tor1aip2	6.45594e-06	0.0423251	0.379	0.231	0.105748	other
Nipsnap1	3.17893e-06	0.0423155	0.42	0.257	0.0524619	other
Arhgap20	0.000715467	0.0422976	0.531	0.376	1	other
Rps6ka3	2.06658e-05	0.0422719	0.111	0.052	0.333485	other
Paxip1	1.13587e-05	0.0422651	0.3	0.18	0.184738	other
Arhgef3	0.000206352	0.0422578	0.124	0.066	1	other
Ranbp9	0.000303924	0.0422531	0.345	0.227	1	other
Psip1	0.00141706	0.0422424	0.763	0.569	1	other
Snx6	9.27868e-05	0.0422412	0.275	0.171	1	other
Suclg1	0.000914584	0.0422332	0.424	0.292	1	other
Gm26782	4.67594e-05	0.0422099	0.533	0.357	0.745485	other
Dgkq	8.51286e-07	0.0422058	0.39	0.227	0.0142029	other
Gnb5	3.12867e-05	0.0422057	0.47	0.302	0.501744	other
Acacb	0.000228864	0.0421993	0.106	0.054	1	other
Sertm1	8.15476e-05	0.0421522	0.07	0.028	1	other
Mypop	1.80089e-06	0.0420719	0.35	0.204	0.0298732	other
Pnpo	9.13877e-05	0.042002	0.3	0.19	1	other
Uqcrq	0.00245866	0.0419979	0.831	0.652	1	other
Gpr180	1.65842e-06	0.0419925	0.223	0.118	0.0275248	other
Lig4	2.02074e-06	0.0419887	0.14	0.064	0.0334876	other
Pla2g12a	8.12678e-06	0.0419361	0.39	0.235	0.132751	other
Rab43	6.58659e-06	0.0419083	0.081	0.03	0.107875	other
Gpatch2l	2.78707e-06	0.0418884	0.215	0.116	0.046048	other
Lncpint	5.55565e-06	0.0418736	0.158	0.079	0.0911294	other
Tmem19	4.69074e-07	0.0418091	0.273	0.147	0.00785746	other
Eif2s1	1.79055e-05	0.0418056	0.158	0.082	0.289514	other
Zscan21	8.31925e-05	0.0417435	0.126	0.065	1	other
Chn2	0.000675092	0.0417337	0.28	0.19	1	other
Apba2	0.000351323	0.0416746	0.494	0.34	1	other
Srp19	7.20095e-05	0.0416507	0.51	0.339	1	other
Msl1	0.00270377	0.0416506	0.765	0.57	1	other
Dlx6	7.665e-05	0.0416214	0.294	0.184	1	other
Harbi1	1.0236e-05	0.0416059	0.11	0.049	0.166725	other
Cnot1	8.43013e-05	0.0416032	0.436	0.288	1	other
Ndrg4	0.0302164	0.041599	0.968	0.931	1	other
Uspl1	2.2914e-05	0.0415621	0.242	0.142	0.369259	other
Tceal1	0.000229971	0.0415596	0.567	0.386	1	other
Sybu	0.000943124	0.0415027	0.627	0.446	1	other
Psma1	0.00192976	0.0414937	0.776	0.581	1	other
Coq10b	8.12459e-07	0.0414818	0.217	0.113	0.0135599	other
Plscr4	2.19194e-07	0.0413581	0.059	0.014	0.00368992	other
Kctd1	0.000219218	0.0413173	0.108	0.055	1	other
Zfp605	1.08508e-06	0.0412062	0.083	0.028	0.0180677	other
H2afy2	6.58643e-05	0.0411717	0.187	0.107	1	other
Hcfc1r1	1.53648e-06	0.0411669	0.598	0.38	0.0255087	other
C2cd2l	0.000175148	0.0411237	0.472	0.317	1	other
Chic1	6.2292e-05	0.0411176	0.474	0.313	0.987327	other
Lpp	3.31944e-05	0.0410221	0.253	0.152	0.531808	other
Ksr1	9.54845e-06	0.0410002	0.126	0.059	0.155678	other
Cacnb2	5.23541e-05	0.0409946	0.28	0.174	0.833005	other
Clmn	4.28952e-06	0.0409943	0.399	0.249	0.0705497	other
Aacs	1.22945e-05	0.0409204	0.162	0.083	0.199785	other
Cog3	7.46057e-06	0.0409169	0.163	0.082	0.12198	other
Ufl1	3.45611e-05	0.0408822	0.235	0.139	0.553392	other
Lrrtm3	0.000453993	0.0408432	0.533	0.37	1	other
Stau2	0.0023212	0.0408166	0.704	0.515	1	other
Ppp1r21	1.7411e-05	0.0407846	0.478	0.311	0.281658	other
Msh2	2.00856e-05	0.0407769	0.253	0.149	0.324302	other
Pde4dip	0.000212937	0.0407322	0.472	0.314	1	other
Fibin	0.00205377	0.0406861	0.041	0.016	1	other
Sdhc	8.68085e-05	0.0406597	0.548	0.369	1	other
5730409E04Rik	0.000162913	0.0406142	0.388	0.255	1	other
Pkia	0.00561719	0.0406004	0.783	0.598	1	other
Agap1	0.00343764	0.040549	0.677	0.501	1	other
Dars	4.90624e-05	0.0405456	0.296	0.184	0.781662	other
C1galt1c1	3.78156e-05	0.0405427	0.189	0.106	0.604899	other
Hccs	2.75522e-05	0.0405336	0.275	0.165	0.442819	other
Srpk2	0.0243238	0.0405315	0.851	0.693	1	other
Zfp617	9.96668e-06	0.0405108	0.289	0.169	0.162387	other
Mrps30	0.000173555	0.0404875	0.12	0.063	1	other
Mllt10	4.5735e-06	0.0404786	0.454	0.284	0.0751608	other
Hspb11	6.93132e-06	0.0404331	0.285	0.166	0.113431	other
Arhgap26	0.00343615	0.040423	0.469	0.335	1	other
Kcna1	1.85121e-05	0.0404195	0.108	0.049	0.299175	other
Tspyl5	4.60516e-05	0.0404046	0.467	0.305	0.734339	other
Cep164	3.74401e-06	0.0403933	0.47	0.288	0.0616489	other
Lamb1	1.68608e-06	0.0403875	0.068	0.021	0.0279771	other
Arih1	1.78153e-05	0.0403711	0.404	0.254	0.288073	other
Prkaa2	6.04342e-06	0.0402974	0.257	0.146	0.0990396	other
Rps16	0.00316772	0.0402469	1	0.995	1	other
Syt16	5.15927e-06	0.0402227	0.359	0.215	0.0846895	other
Fam160a2	0.000104833	0.0401886	0.334	0.215	1	other
Exoc4	5.82556e-05	0.0401743	0.408	0.269	0.924516	other
Rpl27-ps3	5.57417e-05	0.0401739	0.278	0.171	0.88529	other
Gpkow	7.26141e-06	0.0401616	0.253	0.146	0.118768	other
Ifngr2	3.05448e-05	0.040144	0.334	0.207	0.48997	other
Rpl15	0.0307505	0.0401256	0.996	0.98	1	other
Hibadh	0.000157252	0.0400955	0.285	0.184	1	other
Stmn2	0.0525551	0.0400593	0.996	0.925	1	other
Gtpbp4	0.000164063	0.0400533	0.506	0.342	1	other
Mtch2	0.000150254	0.0400344	0.517	0.346	1	other
Tpd52	1.40958e-05	0.0400048	0.481	0.31	0.228676	other
Mmd	0.00253769	0.0399528	0.686	0.505	1	other
1700066M21Rik	7.1627e-05	0.0399418	0.156	0.086	1	other
Selenot	0.0013843	0.0399082	0.794	0.615	1	other
Tspan7	0.0591512	0.0398441	0.984	0.929	1	other
Krt90	2.74608e-06	0.0398109	0.074	0.024	0.0453817	other
Rilpl1	9.29059e-05	0.0396988	0.172	0.098	1	other
Creb3l1	0.000581686	0.039672	0.045	0.016	1	other
Prtg	4.69891e-06	0.0396531	0.047	0.011	0.0771938	other
Ddx10	5.99641e-05	0.0396502	0.145	0.078	0.951151	other
Borcs5	0.000109045	0.0396394	0.239	0.146	1	other
Psmg1	9.10613e-07	0.0395904	0.131	0.057	0.0151827	other
Zc3h7a	2.18079e-05	0.0395541	0.28	0.171	0.351674	other
Hnrnpa2b1	0.0189284	0.0395514	0.962	0.817	1	other
Ccser2	0.000737622	0.0394752	0.481	0.337	1	other
Adipor1	2.01846e-05	0.0394655	0.379	0.236	0.32588	other
Polr3f	1.94306e-06	0.0394156	0.262	0.147	0.032216	other
Cap1	6.17339e-05	0.0393449	0.101	0.047	0.978667	other
Naaa	6.02468e-05	0.03934	0.271	0.166	0.955514	other
Mlh1	4.26077e-05	0.0393101	0.088	0.038	0.680233	other
2610301B20Rik	2.40952e-06	0.0392855	0.445	0.275	0.0398752	other
Gtf2e1	1.8198e-06	0.0392299	0.145	0.067	0.0301832	other
Zfp281	5.37977e-05	0.0391983	0.338	0.212	0.855222	other
Cmip	0.000308019	0.0391649	0.592	0.405	1	other
Rac3	0.00012059	0.0391322	0.591	0.402	1	other
Gad1	0.0377014	0.0391291	0.865	0.75	1	other
Etnk1	0.0237734	0.039109	0.921	0.795	1	other
Dlx1	0.0023006	0.0390818	0.864	0.683	1	other
Ndufs6	0.0095887	0.0390247	0.702	0.519	1	other
Mrpl52	0.00748325	0.0390084	0.847	0.71	1	other
Fkbp14	0.000297316	0.0389656	0.12	0.065	1	other
Tomm20	0.0145252	0.0389136	0.953	0.857	1	other
Tmed8	0.000177425	0.038894	0.548	0.371	1	other
Gsto1	3.36854e-05	0.038882	0.183	0.103	0.539539	other
Sstr1	9.10396e-07	0.0388416	0.09	0.032	0.0151799	other
Elovl4	7.47634e-05	0.0388159	0.499	0.335	1	other
Rnf11	0.00492187	0.0387996	0.959	0.873	1	other
Mrpl36	6.86388e-06	0.0387815	0.194	0.103	0.112348	other
Rap1gap2	0.00032131	0.0386707	0.442	0.302	1	other
Rapgef5	6.12984e-06	0.0386707	0.203	0.109	0.100431	other
Abhd17b	1.62117e-05	0.0386629	0.345	0.212	0.262565	other
Sar1b	1.67902e-05	0.0385843	0.329	0.202	0.271834	other
Ildr2	0.00189708	0.0385792	0.521	0.375	1	other
Mfsd4b4	2.28542e-06	0.0385715	0.092	0.034	0.0378328	other
Cradd	3.9986e-05	0.0385705	0.081	0.033	0.638897	other
Ankrd17	0.00190654	0.0384859	0.806	0.588	1	other
Tmem231	4.60497e-05	0.0384465	0.212	0.122	0.734354	other
Hexim1	0.000210878	0.0383945	0.25	0.16	1	other
Aig1	8.58967e-05	0.0383741	0.51	0.344	1	other
Etf1	1.98707e-05	0.0383312	0.506	0.334	0.320872	other
Bex2	0.0280894	0.038315	0.98	0.91	1	other
Immt	2.41808e-06	0.0382709	0.479	0.294	0.040012	other
Rhobtb3	2.0372e-05	0.0382065	0.101	0.044	0.328866	other
Nudcd1	1.61102e-05	0.0381221	0.282	0.167	0.260953	other
Itpa	1.65174e-05	0.0381185	0.339	0.204	0.267483	other
Senp2	0.000111775	0.0380599	0.519	0.349	1	other
Psmd6	5.38701e-06	0.038057	0.3	0.174	0.0884062	other
Fgd5	0.000114206	0.0380423	0.122	0.063	1	other
Wasf1	8.29545e-05	0.0380121	0.487	0.325	1	other
Fbxo31	4.30526e-05	0.0379687	0.381	0.24	0.687206	other
Emc6	0.000280172	0.0379534	0.589	0.414	1	other
Slco5a1	1.65758e-06	0.0379355	0.072	0.023	0.0275126	other
Rabif	1.47995e-05	0.0379198	0.278	0.166	0.239929	other
Mgea5	0.00456922	0.0379019	0.677	0.508	1	other
Lsm14b	0.000171925	0.037884	0.352	0.229	1	other
Cdo1	0.000214765	0.0378563	0.154	0.088	1	other
Pitpna	0.00624418	0.037805	0.718	0.55	1	other
Vwc2l	8.01578e-06	0.0377299	0.133	0.063	0.130954	other
Wars	5.34875e-05	0.0377193	0.413	0.267	0.850398	other
Kdelc2	2.86632e-05	0.0377113	0.061	0.021	0.460359	other
Metap1	3.29625e-06	0.0376953	0.472	0.29	0.0543717	other
Aida	0.00110934	0.0376853	0.65	0.463	1	other
Mfng	0.00187742	0.0376689	0.106	0.061	1	other
Med14	2.61249e-05	0.0376048	0.325	0.202	0.420166	other
Gcc2	0.00211966	0.0375807	0.549	0.396	1	other
Tmx3	4.04434e-05	0.0374483	0.544	0.362	0.646084	other
Rrbp1	0.000216488	0.0373335	0.406	0.274	1	other
Elp3	2.66982e-05	0.0373306	0.465	0.304	0.429307	other
Phf21b	1.73332e-05	0.0373252	0.034	0.006	0.280469	other
Smim18	4.80415e-05	0.0373104	0.145	0.077	0.765686	other
Dleu7	0.000205104	0.0373103	0.185	0.11	1	other
Zfp277	1.34209e-05	0.0372971	0.126	0.06	0.217848	other
Ndst3	0.0037688	0.0372842	0.101	0.06	1	other
Ttc21b	0.000134887	0.0372601	0.235	0.146	1	other
Msh3	7.1702e-06	0.0372559	0.199	0.108	0.117297	other
Smc5	1.07324e-05	0.037252	0.352	0.212	0.174745	other
Rab7	0.0178996	0.0372406	0.824	0.645	1	other
Magee2	0.000154167	0.0372152	0.151	0.084	1	other
Farsb	7.12768e-06	0.0371732	0.341	0.205	0.116616	other
Gas6	0.000130413	0.0371483	0.296	0.187	1	other
Cdk4	1.26982e-05	0.0371462	0.321	0.192	0.206269	other
Chrm2	0.000342528	0.0371321	0.079	0.037	1	other
Lpin1	3.10059e-05	0.03713	0.438	0.284	0.497304	other
Ddx54	6.71692e-06	0.0371244	0.163	0.082	0.109976	other
Platr25	6.91378e-05	0.0371215	0.101	0.047	1	other
Sdhaf2	0.000133303	0.0370945	0.303	0.194	1	other
Tdrkh	3.38998e-05	0.0370537	0.289	0.175	0.542939	other
Glrx	7.2952e-05	0.0370289	0.228	0.137	1	other
Thoc7	0.0107989	0.0370065	0.655	0.497	1	other
Eif2b3	2.38833e-06	0.0369448	0.135	0.061	0.0395316	other
Csmd2	7.08647e-05	0.0369241	0.329	0.21	1	other
Ywhae	0.00157315	0.0369169	0.995	0.938	1	other
2900097C17Rik	0.0339982	0.0369119	0.991	0.981	1	other
Phtf1	0.000469199	0.0368944	0.291	0.193	1	other
Cldn1	0.000138488	0.036871	0.077	0.033	1	other
Gm17322	2.21683e-05	0.0368469	0.041	0.01	0.357398	other
Csde1	0.0147937	0.0367997	0.93	0.794	1	other
Slc4a3	0.000162287	0.0367618	0.488	0.334	1	other
Tmem170b	2.96432e-06	0.0367194	0.382	0.228	0.0489588	other
Garnl3	4.54292e-05	0.0366854	0.391	0.25	0.724687	other
Fam118a	4.44337e-05	0.0366773	0.264	0.161	0.709028	other
Gm16638	9.78154e-05	0.0366538	0.088	0.04	1	other
Elmo2	7.60229e-06	0.0366337	0.379	0.232	0.124275	other
Siah3	0.000322342	0.0366251	0.07	0.031	1	other
Srp9	0.00470511	0.0366035	0.754	0.571	1	other
Frrs1l	0.00442227	0.0365873	0.84	0.655	1	other
Gtf2f2	4.81764e-05	0.0365456	0.099	0.045	0.767787	other
Zfp871	0.000244783	0.0365297	0.289	0.188	1	other
Zfp811	8.7239e-06	0.0365155	0.25	0.143	0.142348	other
Tram1l1	0.000289587	0.0364231	0.513	0.362	1	other
Negr1	0.0716317	0.0364214	0.952	0.844	1	other
Rnf10	0.00183364	0.0363354	0.693	0.509	1	other
Wdr1	0.000405419	0.0362676	0.648	0.449	1	other
Cmpk1	0.0013073	0.0362199	0.618	0.438	1	other
Gprin2	2.55618e-05	0.0362025	0.158	0.082	0.411289	other
Cox6c	0.0457904	0.0361861	0.964	0.853	1	other
Tmed7	0.000194555	0.036173	0.657	0.455	1	other
Inafm2	0.000162231	0.0361003	0.217	0.131	1	other
Sh3bp5	3.83511e-05	0.0359972	0.276	0.166	0.613234	other
Eif5a	0.0205017	0.0359972	0.905	0.769	1	other
Dlc1	0.000346001	0.0359932	0.172	0.103	1	other
Ppargc1a	0.000315269	0.0359883	0.171	0.101	1	other
Ahcyl1	2.94516e-05	0.0359556	0.571	0.377	0.472669	other
Pcdhgc5	0.000186985	0.0359254	0.072	0.031	1	other
Scp2	3.26806e-05	0.0359229	0.348	0.216	0.523739	other
Sgip1	0.0144934	0.0359125	0.826	0.641	1	other
Camkv	0.000643471	0.0358806	0.643	0.466	1	other
Slc38a1	0.0110665	0.0357981	0.844	0.684	1	other
Gbp7	7.53886e-08	0.0357771	0.032	0.002	0.00127565	other
Sparcl1	0.000292227	0.0357293	0.205	0.127	1	other
Gpr6	3.9657e-05	0.0357164	0.075	0.03	0.633759	other
Cbx6	0.0087302	0.0356954	0.898	0.754	1	other
Pnkd	0.00110567	0.0356951	0.576	0.42	1	other
Hmgxb3	0.000114766	0.0356759	0.163	0.091	1	other
Rps27l	0.000200645	0.0356593	0.402	0.267	1	other
Aldh18a1	2.65881e-05	0.0356512	0.126	0.061	0.427589	other
Mgat5b	1.82785e-05	0.0356475	0.197	0.108	0.295436	other
Rab9	0.000143407	0.0355988	0.25	0.156	1	other
Zfp664	0.000356537	0.0355464	0.539	0.367	1	other
Psma2	0.000515358	0.0354821	0.605	0.426	1	other
4930447C04Rik	0.000128611	0.0354339	0.206	0.126	1	other
Smyd2	0.000417318	0.0353431	0.417	0.286	1	other
Plekhb1	0.000178222	0.0353011	0.339	0.223	1	other
Mrpl49	1.07814e-05	0.0352929	0.276	0.163	0.175531	other
Galnt1	2.51466e-05	0.0352585	0.368	0.23	0.404659	other
Kat2a	2.08969e-05	0.0352114	0.285	0.169	0.337171	other
Btbd11	2.14397e-05	0.0351771	0.44	0.287	0.345866	other
Snw1	8.30985e-06	0.0351736	0.44	0.276	0.13565	other
Nudcd2	2.44936e-06	0.0351412	0.321	0.188	0.0405221	other
Dnah7a	0.00014669	0.0351388	0.126	0.066	1	other
Tshz1	0.000208254	0.0351143	0.273	0.175	1	other
Hs3st4	0.000396257	0.0350864	0.165	0.098	1	other
Slc22a23	7.23114e-05	0.0350714	0.185	0.105	1	other
Prkar1a	0.031662	0.0350673	0.982	0.954	1	other
Zfp442	2.34786e-05	0.0350482	0.115	0.054	0.37817	other
Sesn2	9.23034e-05	0.0350362	0.138	0.073	1	other
Nfe2l1	0.00497692	0.035022	0.847	0.675	1	other
Sem1	0.0460675	0.035004	0.935	0.785	1	other
Klf9	1.34483e-05	0.0349682	0.415	0.263	0.218266	other
Esf1	0.000129317	0.0349587	0.364	0.241	1	other
Patz1	2.59311e-05	0.0349549	0.253	0.149	0.417076	other
4930453N24Rik	9.19525e-05	0.0349144	0.167	0.094	1	other
Zfp324	2.27569e-05	0.0348832	0.075	0.029	0.366795	other
Bag5	0.000113549	0.034817	0.251	0.154	1	other
Gm26652	4.99759e-05	0.0348169	0.092	0.041	0.795817	other
B930025P03Rik	0.000846202	0.034798	0.038	0.013	1	other
Copa	0.00165586	0.0347369	0.645	0.464	1	other
Ugp2	6.66544e-06	0.0346803	0.223	0.123	0.109153	other
Vps29	0.000339768	0.0346737	0.567	0.386	1	other
Rmnd5a	5.18881e-05	0.0346412	0.445	0.287	0.825747	other
Myb	2.03666e-05	0.0345783	0.054	0.016	0.328798	other
Cbll1	5.93562e-05	0.0345752	0.212	0.123	0.941568	other
Cavin3	0.00106084	0.034572	0.135	0.08	1	other
Pyurf	2.41298e-06	0.0345581	0.19	0.099	0.03993	other
Mtfr1	0.00010715	0.0345481	0.086	0.039	1	other
Atg7	0.000436522	0.0345092	0.127	0.071	1	other
Mtmr7	4.42838e-05	0.0344956	0.221	0.128	0.706724	other
Camkk1	0.000435058	0.0344692	0.372	0.254	1	other
1810041H14Rik	7.26473e-07	0.0344461	0.036	0.005	0.012135	other
Gm6563	0.000398357	0.0344321	0.084	0.041	1	other
Zfp758	0.000198066	0.034422	0.083	0.038	1	other
Tomm70a	0.0212548	0.0344025	0.828	0.657	1	other
Pwp1	0.00180206	0.0343631	0.11	0.063	1	other
Cacna1i	5.30252e-05	0.0343482	0.354	0.225	0.843207	other
Sqstm1	0.0618223	0.034343	0.767	0.639	1	other
Lrsam1	3.5048e-05	0.0343192	0.239	0.141	0.561083	other
Kcnh2	0.00140585	0.0342761	0.201	0.13	1	other
Tmem44	0.000737361	0.0342746	0.079	0.039	1	other
Tmem192	2.4413e-05	0.0342601	0.406	0.259	0.393024	other
Rnf217	0.000800791	0.0342594	0.158	0.096	1	other
Trmt10c	0.00029302	0.0342353	0.117	0.062	1	other
Abcc1	2.0748e-05	0.0342275	0.138	0.069	0.33479	other
A330008L17Rik	0.00306976	0.0342045	0.086	0.048	1	other
Rundc1	6.64953e-07	0.0341994	0.239	0.125	0.0111154	other
Tpgs2	3.76429e-05	0.0341954	0.282	0.171	0.602211	other
Gm39244	0.000154534	0.0341834	0.081	0.036	1	other
Cdc14b	0.00187863	0.0341756	0.241	0.164	1	other
Trappc8	3.04837e-05	0.0341739	0.255	0.151	0.48905	other
Lsm6	0.0202394	0.0341503	0.743	0.565	1	other
Egln1	0.000121088	0.0341047	0.259	0.16	1	other
Fam196b	0.000116167	0.0340505	0.111	0.056	1	other
Ankhd1	2.91545e-05	0.0340395	0.226	0.131	0.468047	other
Cdh10	0.00148156	0.0340252	0.176	0.111	1	other
Hyou1	8.34394e-06	0.0339684	0.251	0.142	0.13619	other
Cacng3	5.78156e-05	0.0339655	0.19	0.108	0.917765	other
BC024978	9.23133e-05	0.0339616	0.102	0.049	1	other
Nav1	0.00347846	0.0339547	0.853	0.671	1	other
Zcchc2	7.29413e-06	0.0339433	0.151	0.074	0.119296	other
Rgs2	0.000102537	0.0339392	0.481	0.337	1	other
Tln2	0.000554501	0.0339139	0.429	0.297	1	other
Slc30a5	7.61069e-07	0.0339065	0.241	0.128	0.0127068	other
B230217O12Rik	2.68163e-05	0.0338992	0.201	0.114	0.431153	other
Tmem189	0.000212297	0.0338939	0.221	0.137	1	other
Map4	0.00452274	0.0338513	0.91	0.738	1	other
Rbmx	6.02202e-05	0.0338397	0.206	0.121	0.955152	other
Ctxn2	0.0300662	0.0338165	0.684	0.557	1	other
Mtor	5.41124e-05	0.0338151	0.348	0.222	0.860117	other
Cwf19l2	0.000125519	0.0338028	0.278	0.175	1	other
Tor1a	4.52203e-07	0.0338001	0.291	0.158	0.00757621	other
Azin1	2.37547e-05	0.0337982	0.469	0.302	0.382546	other
Nfrkb	3.13402e-05	0.033792	0.235	0.137	0.502572	other
Zfp719	0.000141728	0.0336863	0.135	0.071	1	other
Moxd1	0.000114848	0.033662	0.038	0.01	1	other
Rpsa	0.033199	0.0336258	0.998	0.976	1	other
Mafb	0.000417645	0.0335593	0.039	0.013	1	other
Adgrl3	0.000445089	0.0335581	0.724	0.507	1	other
Rpn2	1.84907e-05	0.0335519	0.404	0.253	0.298847	other
Fam210b	3.38381e-06	0.033541	0.095	0.037	0.0557923	other
1700052K11Rik	1.87649e-05	0.0334884	0.099	0.043	0.303185	other
Prcc	4.30957e-06	0.033486	0.127	0.058	0.0708665	other
Tox4	6.81384e-05	0.0334815	0.436	0.28	1	other
Ric3	7.62219e-05	0.0334741	0.51	0.349	1	other
Gm11361	4.06574e-05	0.033444	0.108	0.051	0.649461	other
Trim62	0.000542902	0.0334316	0.147	0.087	1	other
Nsg2	0.0160812	0.0334126	0.995	0.953	1	other
Cables1	0.000318051	0.0334007	0.077	0.035	1	other
Paqr8	0.000282089	0.0333912	0.131	0.072	1	other
Pigq	5.48617e-05	0.0333645	0.298	0.185	0.871697	other
Wdr59	3.74682e-05	0.0333578	0.153	0.08	0.599529	other
Ablim2	0.000129332	0.0332851	0.445	0.293	1	other
Dmrtc1a	2.67455e-06	0.0332822	0.169	0.083	0.0442129	other
Nlgn1	0.000453781	0.0332638	0.535	0.371	1	other
Mei4	1.92871e-05	0.0331578	0.07	0.025	0.311505	other
Pgbd5	7.67129e-06	0.0331543	0.275	0.158	0.125395	other
Slc25a30	8.4546e-06	0.0331378	0.212	0.117	0.137979	other
Nxt2	0.00018175	0.033132	0.228	0.138	1	other
1700003E16Rik	0.000120993	0.0330952	0.135	0.072	1	other
Mtcl1	2.68667e-05	0.0330527	0.235	0.137	0.431936	other
Fam163b	0.000294823	0.0330252	0.26	0.165	1	other
Ankrd29	0.00024258	0.033011	0.111	0.058	1	other
Brs3	0.0128541	0.0329689	0.215	0.157	1	other
Dcaf8	0.000246752	0.0329424	0.583	0.405	1	other
Psmd2	0.000226503	0.0329369	0.465	0.312	1	other
Ccdc91	0.00115049	0.0328803	0.208	0.134	1	other
Gm45509	0.0058969	0.0328672	0.061	0.032	1	other
Fst	0.000521314	0.0328671	0.025	0.005	1	other
Adal	3.85501e-05	0.0328133	0.118	0.058	0.616339	other
Fam193b	8.68051e-05	0.0328108	0.524	0.344	1	other
Qars	1.27435e-05	0.0327987	0.156	0.08	0.206992	other
Saraf	0.0237936	0.0327687	0.925	0.808	1	other
Phb	4.44875e-05	0.0327495	0.445	0.289	0.709842	other
Lrrc3	4.6605e-05	0.0327257	0.111	0.053	0.743069	other
Rassf8	0.000187873	0.0327006	0.46	0.31	1	other
Morn2	0.000699037	0.0326722	0.39	0.267	1	other
Sept11	0.000812285	0.0326444	0.609	0.436	1	other
Pigp	8.39406e-06	0.0326098	0.228	0.127	0.136999	other
Sec61g	0.00349562	0.0325937	0.894	0.708	1	other
Arhgap42	0.000174221	0.032561	0.066	0.027	1	other
Fdps	0.000575957	0.0325604	0.235	0.153	1	other
Rad17	6.55449e-05	0.0325253	0.189	0.107	1	other
Gyg	0.00485694	0.032521	0.19	0.129	1	other
Gm14418	6.02576e-05	0.032514	0.09	0.04	0.955625	other
Nek10	0.000118754	0.0324526	0.086	0.039	1	other
Polr2b	0.000824454	0.0324189	0.183	0.114	1	other
Polr2h	7.57059e-05	0.0324005	0.16	0.088	1	other
Rpl9	0.0391986	0.0323954	1	0.999	1	other
Gm15609	8.80151e-05	0.0323676	0.07	0.028	1	other
Ralgapa1	0.000887823	0.0323655	0.54	0.378	1	other
Celf2	0.0596853	0.0323338	0.878	0.743	1	other
Tubb3	0.0160401	0.0322837	0.811	0.646	1	other
Wdr44	2.93328e-05	0.0322622	0.115	0.054	0.470879	other
Grhl1	0.000675679	0.0322591	0.127	0.072	1	other
Eny2	0.000768761	0.0322436	0.578	0.407	1	other
Fam210a	0.000131669	0.0322231	0.232	0.141	1	other
Atp5d	0.00448305	0.0322212	0.655	0.494	1	other
Edf1	0.00078062	0.0321825	0.643	0.453	1	other
Vegfb	0.00200514	0.0321747	0.591	0.42	1	other
Txnrd1	0.000168206	0.0321604	0.452	0.305	1	other
Trpm2	1.25806e-06	0.0321484	0.208	0.108	0.0209215	other
Raly	0.000168345	0.0321343	0.302	0.192	1	other
Ndufs5	0.00224292	0.0321067	0.738	0.55	1	other
Igf2r	0.000198572	0.0320998	0.26	0.164	1	other
Elp5	2.32165e-05	0.0320606	0.429	0.271	0.374017	other
Magt1	0.000193634	0.0320244	0.118	0.062	1	other
Wwc1	7.77593e-05	0.0320049	0.215	0.127	1	other
Fgd1	6.69627e-06	0.0319997	0.153	0.075	0.109651	other
Nif3l1	0.00023994	0.0319791	0.174	0.102	1	other
Ppcs	0.000555206	0.0318943	0.099	0.052	1	other
Ccdc59	1.0565e-05	0.0318909	0.39	0.237	0.172041	other
Sumo2	0.0512188	0.0318813	0.952	0.836	1	other
Ndufa12	0.00215475	0.0318696	0.803	0.619	1	other
Slit1	4.29149e-06	0.0317173	0.201	0.107	0.0705778	other
Robo1	0.000813426	0.031714	0.287	0.194	1	other
Kit	0.000184946	0.0316557	0.09	0.042	1	other
Cdkl3	1.62146e-05	0.0316382	0.178	0.095	0.262596	other
Alkbh8	8.52986e-05	0.0316364	0.524	0.354	1	other
Tug1	0.00605137	0.0316164	0.695	0.516	1	other
Mrrf	3.80615e-05	0.0316115	0.165	0.089	0.608755	other
Mirg	0.000474977	0.0316071	0.569	0.399	1	other
Cetn4	1.56113e-05	0.0316067	0.287	0.171	0.252997	other
Necab1	0.0187016	0.0315653	0.165	0.117	1	other
Fads3	0.000316318	0.0315498	0.138	0.078	1	other
Ago3	5.53228e-05	0.0315496	0.4	0.257	0.878747	other
Zfp420	0.00036687	0.0314597	0.126	0.069	1	other
Zfp583	0.00103605	0.0314536	0.09	0.047	1	other
Grik4	0.000411875	0.0314072	0.187	0.113	1	other
Atp6v0d1	0.000658352	0.0313993	0.67	0.474	1	other
Fus	0.0136922	0.0313852	0.905	0.737	1	other
Ubash3b	8.09146e-05	0.0313704	0.21	0.123	1	other
Terf2ip	0.00164205	0.0313375	0.583	0.407	1	other
Mbtps1	1.40935e-05	0.0313036	0.404	0.253	0.228652	other
Scai	0.00182465	0.031295	0.562	0.4	1	other
Pex2	7.57508e-05	0.0312704	0.169	0.093	1	other
Pebp1	0.023844	0.0312216	0.919	0.811	1	other
Vmp1	2.30876e-05	0.0311916	0.373	0.237	0.371964	other
Nipal2	1.29976e-05	0.0310694	0.208	0.114	0.211067	other
Top1	0.0038248	0.0310465	0.819	0.63	1	other
Palm3	0.000892752	0.0310225	0.047	0.018	1	other
Arap1	7.84523e-05	0.0310134	0.081	0.034	1	other
Mxd4	0.000109011	0.0309977	0.431	0.281	1	other
Atrx	0.00273629	0.03098	0.704	0.509	1	other
Hdgfl3	0.0302359	0.030966	0.794	0.643	1	other
Bend5	0.00170564	0.0309269	0.142	0.087	1	other
Gnaq	0.018478	0.0308965	0.894	0.756	1	other
Klc2	0.00165648	0.0308929	0.616	0.429	1	other
Appbp2	0.00735089	0.0308643	0.634	0.471	1	other
Ppp2r2d	0.000426223	0.0308436	0.53	0.363	1	other
Smc6	0.00302179	0.0308415	0.72	0.539	1	other
Med10	0.000152132	0.0308212	0.289	0.183	1	other
Trip4	0.00139202	0.0308067	0.417	0.29	1	other
Ilf2	0.000617855	0.030688	0.478	0.327	1	other
Ric8a	1.35884e-06	0.030638	0.278	0.154	0.0225852	other
Clca3a1	0.00145016	0.0306272	0.059	0.027	1	other
Pgs1	0.000488577	0.0306065	0.284	0.187	1	other
Ufc1	0.000411431	0.0305862	0.397	0.269	1	other
Sdad1	0.000370474	0.0305781	0.248	0.157	1	other
Gm31282	0.000222641	0.0305674	0.12	0.063	1	other
[truncated: 15,567 more rows]
