# Supplementary material for: Esr1-dependent signaling and transcriptional maturation in the medial preoptic area of the hypothalamus shape the development of mating behavior during adolescence
Source: eLife. 2026 Jun 19;14:RP106347. doi: 10.7554/eLife.106347 (PMC13282117; doi:10.7554/eLife.106347)
Supplement: Supplementary file 11. [file elife-106347-supp11.xlsx]

## Sheet: P50FvsP50M_Vgat_Esr1
	p_val	avg_logFC	pct.1	pct.2	p_val_adjust	type
Xist	1.39383e-90	2.28843	0.992	0	2.22749e-86	female_puberty_unrelated
Fgfr1	3.88537e-05	0.630193	0.693	0.638	0.611947	other
Esr1	7.57659e-25	0.629209	0.887	0.664	1.21044e-20	female_puberty_related
Slc18a2	6.96437e-17	0.599957	0.518	0.166	1.11242e-12	other
Rps27rt	5.73887e-29	0.538311	0.969	0.868	9.16956e-25	female_puberty_unrelated
Pcp4	2.46158e-20	0.515335	1	0.991	3.93212e-16	other
Tmem158	9.28162e-13	0.501747	0.903	0.757	1.48125e-08	other
Msi2	1.87922e-12	0.46983	0.712	0.468	2.99886e-08	female_puberty_related
Ptprk	4.42532e-14	0.463373	0.545	0.23	7.06503e-10	female_puberty_unrelated
Socs2	3.1175e-11	0.44612	0.475	0.2	4.97273e-07	female_puberty_related
Wdr89	1.09984e-13	0.427548	0.747	0.498	1.75557e-09	female_puberty_related
Tead1	7.26768e-09	0.420456	0.506	0.289	0.000115752	other
Penk	0.000593138	0.414634	0.401	0.277	1	other
Npy2r	7.31087e-10	0.411281	0.689	0.434	1.16513e-05	other
Pcdh15	4.57812e-08	0.405672	0.482	0.277	0.00072815	female_puberty_related
Ntng1	2.7664e-08	0.403149	0.883	0.736	0.000440189	other
Pcsk2	3.64423e-06	0.393467	0.529	0.357	0.0576627	other
Rgs4	1.13981e-08	0.388163	0.704	0.481	0.000181503	female_puberty_unrelated
Plekhb1	1.81379e-08	0.381216	0.498	0.294	0.000288665	other
Fam46a	1.61128e-07	0.376082	0.486	0.277	0.00256081	other
Bcl11a	2.05375e-09	0.37544	0.576	0.319	3.27244e-05	other
Scg2	2.28147e-13	0.369479	1	1	3.64123e-09	female_puberty_related
Dgkb	2.36402e-08	0.36585	0.813	0.685	0.00037621	other
Maf	4.75522e-07	0.33436	0.342	0.162	0.00754796	other
Pgr15l	3.16399e-05	0.331481	0.307	0.162	0.498487	other
Plp1	1.32781e-10	0.325527	0.599	0.34	2.11733e-06	other
Lman2l	2.97831e-08	0.308958	0.603	0.4	0.000473879	female_puberty_related
Rap1gap	1.01013e-06	0.299717	0.759	0.655	0.0160268	other
Pde1c	4.51385e-06	0.295224	0.619	0.46	0.0713956	other
Negr1	1.70129e-08	0.292213	0.981	0.923	0.000270811	other
2010005H15Rik	1.41659e-06	0.290807	0.401	0.209	0.0224672	female_puberty_unrelated
Slc6a11	0.000132206	0.286322	0.525	0.4	1	other
Lrfn5	3.68351e-08	0.283175	0.957	0.851	0.000586009	other
Ogt	3.41782e-07	0.281541	0.981	0.957	0.00542817	other
Kl	0.000104808	0.26968	0.241	0.115	1	other
Galnt14	2.07018e-07	0.26941	0.432	0.23	0.00328931	other
Meg3	1.7779e-08	0.268034	1	1	0.000282988	female_puberty_related
Klhl24	2.84797e-05	0.265633	0.591	0.477	0.448926	other
Pdyn	3.12346e-05	0.262678	0.253	0.111	0.492132	other
Pnisr	7.86533e-09	0.262496	0.942	0.906	0.000125263	female_puberty_related
AC149090.1	2.62284e-06	0.261966	0.86	0.8	0.0415275	other
Rbm4b	5.88537e-06	0.260986	0.79	0.702	0.0930359	other
Gabre	2.99919e-06	0.25869	0.603	0.417	0.0474742	other
Fndc9	9.43984e-05	0.258103	0.646	0.502	1	other
Gda	2.13638e-06	0.257396	0.833	0.638	0.0338466	other
1810037I17Rik	1.55586e-07	0.250005	0.782	0.617	0.00247289	female_puberty_related
Plcb4	0.000491611	0.248423	0.751	0.672	1	other
Neo1	0.0015157	0.247037	0.502	0.4	1	other
Tcf4	0.000111882	0.245254	0.564	0.409	1	other
Gm26699	9.38542e-06	0.244873	0.588	0.426	0.14828	other
Plxna2	4.44023e-05	0.244542	0.704	0.621	0.699203	other
Spop	1.8063e-05	0.24346	0.794	0.736	0.285052	other
Slc24a5	0.000217697	0.240818	0.626	0.506	1	other
Ssbp2	0.000146903	0.234366	0.595	0.447	1	other
Elavl4	6.76944e-05	0.232099	0.918	0.911	1	other
Slc6a1	2.29342e-05	0.230874	0.77	0.689	0.361741	other
Zranb2	2.14323e-06	0.230787	0.93	0.838	0.0339531	other
Ctxn3	0.000123342	0.230024	0.195	0.077	1	other
Cacna2d1	0.000485333	0.229883	0.459	0.315	1	other
Rufy3	3.21389e-06	0.229369	0.934	0.898	0.050863	other
Nop56	1.9735e-05	0.226533	0.813	0.732	0.311399	other
Elmo1	0.000477494	0.22628	0.716	0.626	1	other
Ctcf	2.57113e-06	0.225524	0.525	0.366	0.0407113	other
Arhgap24	5.87177e-05	0.224746	0.327	0.179	0.924041	other
Rpl9-ps6	0.000110117	0.224623	0.498	0.383	1	other
Mtpn	3.45865e-07	0.223588	0.93	0.885	0.00549269	other
Flrt3	0.00190286	0.223238	0.304	0.204	1	other
Mmd	0.00195926	0.222895	0.735	0.672	1	other
Hmgn1	5.69269e-06	0.222236	0.957	0.877	0.0899958	other
Nr3c1	8.96304e-05	0.221785	0.661	0.506	1	other
Hlf	0.00936726	0.219076	0.568	0.511	1	other
Chordc1	1.25069e-05	0.218349	0.626	0.472	0.197509	other
Plppr4	8.09271e-05	0.217735	0.833	0.77	1	other
Tra2a	3.60886e-06	0.217598	0.887	0.813	0.0571066	other
Tmcc3	0.000165878	0.217542	0.879	0.838	1	other
Fndc3a	2.98772e-05	0.217279	0.763	0.638	0.470865	other
Foxg1	0.000451383	0.216249	0.623	0.489	1	other
Rorb	6.1478e-06	0.21583	0.685	0.443	0.0971783	other
Kcns2	7.35097e-05	0.212438	0.494	0.332	1	other
Romo1	0.000194851	0.212226	0.751	0.66	1	other
Luzp2	6.63214e-05	0.210353	0.451	0.285	1	other
Bicd1	0.0016638	0.209696	0.794	0.719	1	other
Tub	6.32695e-05	0.208345	0.883	0.834	0.995419	other
Mkl2	0.000515841	0.207724	0.774	0.66	1	other
1810041L15Rik	0.000123509	0.204854	0.638	0.532	1	other
Pak2	0.000112543	0.204193	0.444	0.298	1	other
Scn9a	0.000350415	0.204046	0.572	0.43	1	other
Serpini1	0.00133656	0.202428	0.576	0.438	1	other
Chmp3	8.44475e-05	0.201997	0.685	0.545	1	other
Zim1	7.45247e-05	0.20091	0.401	0.243	1	other
Tmem47	0.00142265	0.19842	0.486	0.383	1	other
Srsf5	1.11305e-05	0.198236	0.907	0.877	0.175817	other
Osbpl8	0.000214435	0.197468	0.549	0.417	1	other
Edil3	0.000676536	0.195954	0.638	0.545	1	other
Papola	0.000340807	0.19568	0.724	0.626	1	other
Ddx3x	5.38551e-06	0.194908	0.93	0.817	0.0851557	other
Akap9	4.71492e-05	0.194498	0.868	0.787	0.742317	other
B630019K06Rik	0.000132922	0.193741	0.774	0.66	1	other
5330417C22Rik	0.000895645	0.193533	0.463	0.353	1	other
Mrpl33	0.00104271	0.193407	0.708	0.596	1	other
Zfp462	0.000262671	0.193335	0.805	0.715	1	other
Tmsb4x	5.12862e-10	0.193333	1	1	8.1745e-06	female_puberty_unrelated
Zdhhc2	0.000270026	0.192801	0.704	0.549	1	other
Prrt1	0.00472821	0.192157	0.654	0.591	1	other
Nsa2	0.000609477	0.191718	0.7	0.587	1	other
Atf2	7.63794e-06	0.191477	0.813	0.689	0.120702	other
Emc10	0.000875076	0.190927	0.755	0.668	1	other
Upf2	0.00134809	0.190828	0.572	0.472	1	other
D1Ertd622e	0.000258956	0.189991	0.342	0.213	1	other
Zfpm2	9.33613e-08	0.189132	0.179	0.03	0.00148426	female_puberty_related
March8	0.00133069	0.189024	0.494	0.374	1	other
Tmem255a	0.000847921	0.188748	0.914	0.855	1	other
Ythdc1	0.000134347	0.188506	0.817	0.728	1	other
Clk1	0.000250626	0.188454	0.642	0.528	1	other
Manf	0.000100814	0.18814	0.486	0.332	1	other
Smc5	0.000850017	0.187914	0.455	0.349	1	other
Rbm25	0.000147671	0.187819	0.903	0.838	1	other
Arhgef9	0.0002466	0.187587	0.833	0.749	1	other
Dbpht2	0.000472892	0.187576	0.712	0.63	1	other
Malat1	2.2607e-07	0.187527	1	1	0.00359158	other
Zcchc12	2.08357e-06	0.187459	0.992	0.979	0.0330121	female_puberty_unrelated
Brd9	0.00075178	0.185794	0.553	0.443	1	other
Alg10b	0.000358466	0.18567	0.424	0.289	1	other
Tceal3	0.000518516	0.185271	0.767	0.664	1	other
Hypk	0.00254125	0.184931	0.693	0.685	1	other
Tmem263	0.000647148	0.184117	0.471	0.34	1	other
Dynll1	3.08256e-05	0.184081	0.938	0.898	0.48575	other
Sdk2	0.00174868	0.184056	0.401	0.289	1	other
Polr2f	1.46016e-05	0.183646	0.72	0.553	0.23053	other
Slc4a8	0.000905203	0.183615	0.455	0.328	1	other
Olfm3	0.00475206	0.182863	0.693	0.609	1	other
Dmd	0.0012271	0.182468	0.447	0.323	1	other
Ostc	0.000705753	0.182382	0.51	0.366	1	other
Paip1	0.00612846	0.181844	0.658	0.587	1	other
Mttp	0.000940779	0.181814	0.58	0.472	1	other
Eif2s3x	0.000141493	0.181461	0.732	0.609	1	other
Esyt3	0.00011625	0.181072	0.249	0.119	1	other
Dpy19l1	0.00435144	0.180906	0.331	0.23	1	other
Il1rapl2	5.57396e-07	0.180421	0.163	0.03	0.00884588	other
Sox2	0.005103	0.180233	0.607	0.511	1	other
Rpl36al	0.00010445	0.180034	0.926	0.906	1	other
Sumo1	0.000210255	0.18002	0.883	0.851	1	other
Sccpdh	0.0124461	0.179478	0.732	0.672	1	other
Kif5b	0.00832468	0.178124	0.911	0.881	1	other
Sox5	0.000290801	0.17744	0.327	0.191	1	other
Ormdl1	0.000167341	0.17733	0.261	0.132	1	other
Cnot6l	0.000261714	0.176586	0.545	0.426	1	other
Tnpo2	0.000811817	0.176315	0.494	0.349	1	other
Mrps33	0.000846458	0.175818	0.685	0.583	1	other
Nek7	0.00158708	0.17559	0.296	0.191	1	other
Rbbp6	0.00388642	0.175308	0.805	0.698	1	other
Usp29	0.000309147	0.174249	0.949	0.906	1	other
Wsb1	0.00127759	0.174035	0.576	0.447	1	other
Ssr1	0.000144914	0.173405	0.918	0.877	1	other
Lrif1	0.00991813	0.172893	0.447	0.374	1	other
Grm7	0.00280775	0.172127	0.432	0.323	1	other
Tshz2	0.00189998	0.171892	0.739	0.638	1	other
Nktr	0.000538753	0.171871	0.868	0.83	1	other
St3gal1	0.000258568	0.17136	0.261	0.136	1	other
Fhl1	0.00145598	0.170981	0.638	0.515	1	other
Odc1	0.00872959	0.170949	0.634	0.557	1	other
Rps6ka3	0.000375007	0.170018	0.23	0.115	1	other
Chodl	0.0358626	0.16974	0.323	0.247	1	other
Fam208a	0.0148481	0.169683	0.389	0.306	1	other
2510002D24Rik	0.00041488	0.169059	0.436	0.285	1	other
Vma21	0.00451349	0.168899	0.58	0.498	1	other
Dlg1	0.00198935	0.168869	0.529	0.409	1	other
Ralgps2	0.288564	0.168539	0.541	0.536	1	other
Ddc	0.0390322	0.168451	0.323	0.255	1	other
Ube2w	0.00172167	0.167949	0.572	0.447	1	other
B230209E15Rik	0.00119666	0.167462	0.875	0.872	1	other
Sdf2	0.00652177	0.166912	0.494	0.413	1	other
Morn2	0.00786451	0.166674	0.518	0.43	1	other
Itih5	6.71769e-06	0.166505	0.093	0.004	0.106173	other
Rps27l	0.000440114	0.166487	0.533	0.4	1	other
Tsc1	0.00250282	0.166479	0.677	0.566	1	other
Rasd1	0.00121975	0.165878	0.148	0.06	1	other
Lbhd2	0.0418848	0.165822	0.245	0.187	1	other
Rc3h2	0.00192815	0.165755	0.603	0.506	1	other
Sox4	0.051786	0.165591	0.599	0.536	1	other
Timm10b	0.000814268	0.165321	0.545	0.426	1	other
Bcl7b	0.000364419	0.164959	0.455	0.311	1	other
Son	0.000893711	0.164419	0.949	0.953	1	other
mt-Nd3	2.44001e-06	0.163993	0.996	0.987	0.0386424	female_puberty_related
Enah	0.287538	0.163987	0.907	0.957	1	other
Lrrc58	0.00238589	0.163864	0.732	0.664	1	other
Ddx18	0.000879612	0.163095	0.362	0.234	1	other
Hsph1	0.000534109	0.16309	0.93	0.889	1	other
Il13ra1	0.000501068	0.162982	0.366	0.234	1	other
Slc7a1	0.00458003	0.162203	0.506	0.417	1	other
Cadm1	0.000251389	0.161942	0.984	0.974	1	other
Ptbp3	0.000853481	0.161901	0.253	0.132	1	other
M6pr	0.000240895	0.1616	0.588	0.451	1	other
Cald1	0.000919743	0.161214	0.222	0.115	1	other
Pdk1	0.0138647	0.161052	0.428	0.34	1	other
Mef2c	0.0247456	0.160965	0.284	0.2	1	other
Tspan2	0.00216828	0.160676	0.514	0.387	1	other
Zfr	0.0013482	0.160655	0.883	0.86	1	other
Arsb	0.00294292	0.160502	0.521	0.404	1	other
Dpp10	0.0168444	0.160368	0.63	0.566	1	other
Pnrc2	0.00299294	0.160323	0.401	0.294	1	other
Mafa	9.4364e-05	0.159873	0.109	0.021	1	other
Igf2bp3	0.00139028	0.159766	0.798	0.719	1	other
Usp20	0.00346339	0.159292	0.521	0.43	1	other
Mecp2	0.00340251	0.159204	0.696	0.613	1	other
Nmt1	0.0018876	0.159201	0.704	0.591	1	other
Sgpp1	0.00122707	0.159067	0.584	0.468	1	other
Sptssa	0.00244475	0.158704	0.588	0.494	1	other
Cdh13	0.026802	0.158244	0.498	0.421	1	other
Lnpk	0.00146466	0.158169	0.626	0.502	1	other
Efna5	0.0114725	0.158148	0.895	0.83	1	other
Gpr88	1.32782e-05	0.157726	0.132	0.026	0.209663	other
Snrnp70	0.000255995	0.157424	0.981	0.936	1	other
Fam19a1	0.00154045	0.156951	0.132	0.051	1	other
Cetn3	0.000939033	0.156668	0.728	0.643	1	other
2700097O09Rik	0.00160377	0.156659	0.331	0.213	1	other
Ftx	0.000124499	0.156389	0.249	0.115	1	other
Cggbp1	0.000696431	0.155957	0.685	0.57	1	other
Rgma	0.00355497	0.155507	0.175	0.089	1	other
Stk19	0.0466064	0.155037	0.584	0.515	1	other
Ndst4	0.00066563	0.154703	0.276	0.149	1	other
Nrxn3	4.38722e-06	0.154236	1	0.996	0.0693971	other
Pcbp2	0.000216003	0.15377	0.946	0.915	1	other
Ube3a	7.13526e-06	0.153374	1	0.996	0.112766	other
Gm42851	0.0104005	0.153055	0.381	0.294	1	other
Gtpbp2	0.00274566	0.152884	0.514	0.426	1	other
Med13	0.00101458	0.152877	0.385	0.255	1	other
Ybx1	0.00778804	0.152815	0.708	0.609	1	other
Ppp1r17	0.0251236	0.152731	0.265	0.187	1	other
2610301B20Rik	0.00126091	0.152731	0.51	0.396	1	other
Rpl10-ps3	0.0121548	0.152019	0.607	0.532	1	other
Prdx6	0.00378917	0.151867	0.451	0.34	1	other
Mrpl32	0.000665599	0.151844	0.475	0.353	1	other
Gm5914	0.000212245	0.151715	0.292	0.153	1	other
Sec61a1	0.00470768	0.151713	0.486	0.4	1	other
Ralbp1	0.000219937	0.151381	0.934	0.855	1	other
Npepps	0.00303689	0.151358	0.829	0.783	1	other
Fam204a	0.00152244	0.151121	0.521	0.4	1	other
Tsix	4.82264e-08	0.150853	0.14	0.009	0.000766993	other
BC030500	0.00206569	0.150822	0.374	0.264	1	other
Mesd	0.0164564	0.150704	0.603	0.557	1	other
Syne2	0.00417698	0.150588	0.323	0.209	1	other
Ilf2	0.00178217	0.150021	0.56	0.443	1	other
Sema3a	0.00117555	0.149947	0.206	0.102	1	other
Arpc3	0.000781661	0.149627	0.603	0.477	1	other
Th	0.0127117	0.149031	0.16	0.085	1	other
Gm44644	0.00291843	0.148565	0.852	0.821	1	other
Gmpr2	0.00032093	0.14855	0.214	0.098	1	other
Cpne7	0.00191795	0.148353	0.475	0.345	1	other
Kdm6a	0.000112463	0.148163	0.257	0.123	1	other
Stxbp2	0.000105171	0.148102	0.249	0.115	1	other
L1cam	0.00366695	0.14809	0.767	0.723	1	other
Ahcyl2	0.00209975	0.147902	0.63	0.515	1	other
Lysmd2	0.00199871	0.147817	0.568	0.447	1	other
Gmps	0.000577513	0.147702	0.825	0.732	1	other
Hook2	0.0137104	0.147688	0.409	0.328	1	other
Zfp622	0.0121558	0.146964	0.63	0.523	1	other
Pard3	0.0474198	0.146727	0.432	0.362	1	other
Rbm39	0.000113603	0.146672	0.988	0.987	1	other
Adarb2	0.00373293	0.146659	0.549	0.413	1	other
Brd7	0.00800823	0.146613	0.424	0.328	1	other
Mtus1	0.011268	0.146508	0.304	0.221	1	other
Rxfp3	0.000407838	0.146484	0.113	0.03	1	other
Spint2	0.0225592	0.146393	0.537	0.481	1	other
Bax	0.0146737	0.146241	0.533	0.477	1	other
Thsd7a	0.00493076	0.146157	0.331	0.23	1	other
Rad21	0.00220667	0.146023	0.599	0.506	1	other
Ripor2	0.00749316	0.145893	0.362	0.264	1	other
Tmem50a	0.00381749	0.145858	0.677	0.562	1	other
Myef2	0.0171047	0.145774	0.724	0.702	1	other
Ebf4	0.00159886	0.145631	0.218	0.115	1	other
Fam114a2	0.00795923	0.14542	0.397	0.298	1	other
Cenpx	0.00930937	0.145399	0.323	0.238	1	other
Cstf3	0.00332763	0.145354	0.584	0.481	1	other
Ndufa7	0.00167531	0.144937	0.837	0.715	1	other
Fry	0.0279886	0.144586	0.728	0.655	1	other
Cited2	0.16296	0.144546	0.268	0.23	1	other
Mmp16	0.00129146	0.143711	0.319	0.196	1	other
Herc3	0.000967203	0.143694	0.732	0.591	1	other
Rrbp1	0.0617751	0.143384	0.463	0.413	1	other
Rnpc3	0.00130101	0.143278	0.397	0.277	1	other
Srrm1	0.00439928	0.143165	0.833	0.783	1	other
Foxk1	0.000459596	0.143153	0.28	0.149	1	other
Nkx2-1	0.000218618	0.142868	0.288	0.149	1	other
Hnrnpa2b1	0.000396831	0.142592	0.953	0.979	1	other
Rpl36a-ps1	0.0148582	0.142579	0.3	0.221	1	other
Nat14	0.00978032	0.142566	0.451	0.383	1	other
Zscan26	0.0527058	0.142419	0.568	0.511	1	other
Mia3	0.012518	0.142387	0.545	0.464	1	other
Rsf1	0.00155718	0.142316	0.673	0.523	1	other
Tia1	0.00751808	0.14217	0.911	0.894	1	other
Prickle2	0.0765421	0.142157	0.533	0.515	1	other
Ralyl	0.00133329	0.142064	0.588	0.443	1	other
Pnn	0.00664098	0.142046	0.724	0.672	1	other
A730046J19Rik	0.000840329	0.141994	0.113	0.034	1	other
Grin2b	0.00234714	0.141684	0.914	0.902	1	other
Gng5	0.000734626	0.141455	0.288	0.162	1	other
Chml	0.00735147	0.141359	0.319	0.221	1	other
Tmcc1	0.02218	0.141326	0.634	0.557	1	other
Tab2	0.0536972	0.141135	0.432	0.387	1	other
Tmem161b	0.00161145	0.14099	0.198	0.102	1	other
Zfp280d	0.00271676	0.140724	0.494	0.357	1	other
Stxbp5l	0.00103775	0.14057	0.459	0.315	1	other
Rps12	1.18106e-05	0.14054	1	0.996	0.186525	other
Sem1	0.00496356	0.140256	0.961	0.932	1	other
Fhad1	0.00738187	0.140062	0.471	0.362	1	other
Sox11	0.0197158	0.139773	0.817	0.753	1	other
Nectin3	0.0338957	0.139557	0.3	0.23	1	other
Ptma	0.00121699	0.139201	0.969	0.983	1	other
Rtf1	0.00642753	0.139183	0.852	0.843	1	other
Bpnt1	0.0385205	0.139072	0.541	0.485	1	other
Ccp110	0.00458813	0.138996	0.385	0.294	1	other
Fsd1l	0.011608	0.138895	0.537	0.464	1	other
Gpbp1	0.00703838	0.138871	0.661	0.638	1	other
Luc7l2	0.00207833	0.138666	0.934	0.906	1	other
Creb1	0.00337777	0.138473	0.346	0.238	1	other
Il6st	0.0156778	0.138391	0.331	0.251	1	other
Mgat1	0.00781075	0.138268	0.409	0.302	1	other
Taf15	0.00551337	0.137829	0.506	0.409	1	other
Golga7	0.0116177	0.137812	0.424	0.34	1	other
Gpatch8	0.00541444	0.13737	0.525	0.438	1	other
Ly6e	0.0593302	0.137032	0.7	0.672	1	other
Sdhaf4	0.00209445	0.136904	0.451	0.323	1	other
Lman1	0.0031997	0.136898	0.397	0.277	1	other
Rab34	0.0900235	0.136727	0.335	0.277	1	other
Ptpro	0.00343504	0.13647	0.755	0.698	1	other
Zfp410	0.00214995	0.136389	0.241	0.132	1	other
Lztfl1	0.00790033	0.136348	0.623	0.528	1	other
R3hdm1	0.000280055	0.136222	0.872	0.774	1	other
Ccar1	0.00480528	0.136123	0.564	0.455	1	other
Slc12a2	0.0143869	0.135798	0.296	0.217	1	other
Taf1d	0.0293346	0.135671	0.619	0.566	1	other
Lin7c	0.0521456	0.135522	0.58	0.557	1	other
Snrnp27	0.00302889	0.135431	0.755	0.672	1	other
Gt(ROSA)26Sor	0.00661496	0.135408	0.323	0.23	1	other
Carf	0.0149195	0.135196	0.374	0.272	1	other
Sdf2l1	0.00378785	0.135163	0.202	0.111	1	other
Rab10os	0.0118513	0.135113	0.327	0.234	1	other
Bola3	0.0115108	0.13499	0.708	0.63	1	other
Srsf7	0.0340027	0.134842	0.661	0.579	1	other
Mrpl27	0.00194644	0.134728	0.362	0.247	1	other
Rcan3	0.00886438	0.134639	0.451	0.353	1	other
Il1rapl1	0.0772673	0.134627	0.304	0.251	1	other
Mgat4c	0.0713888	0.134347	0.315	0.251	1	other
H2afv	0.0621453	0.134321	0.494	0.421	1	other
Cyb5a	0.00484879	0.134291	0.553	0.477	1	other
Ccpg1	0.0155042	0.134222	0.346	0.26	1	other
Fermt2	0.00937758	0.133942	0.311	0.217	1	other
Txndc17	0.0101731	0.133711	0.724	0.689	1	other
Pcif1	0.00225192	0.133606	0.521	0.37	1	other
Arhgef28	0.00504507	0.133169	0.206	0.123	1	other
Mllt3	0.00929596	0.132867	0.412	0.328	1	other
Egr2	1.71087e-05	0.132734	0.097	0.009	0.270026	other
Ttc33	0.0272835	0.132633	0.568	0.519	1	other
Slf2	0.00599691	0.132273	0.556	0.443	1	other
Htr1b	0.0554913	0.132265	0.424	0.357	1	other
Sec61a2	0.0309648	0.132105	0.716	0.655	1	other
Sec61b	0.0584369	0.131893	0.712	0.672	1	other
Asb4	0.003322	0.131781	0.366	0.251	1	other
Pdrg1	0.0123289	0.131729	0.331	0.238	1	other
Naa15	0.0102387	0.13153	0.623	0.506	1	other
Nr1d1	0.00188718	0.131518	0.226	0.123	1	other
4921524J17Rik	0.00265601	0.131287	0.296	0.191	1	other
Lin7a	0.0278056	0.13124	0.514	0.438	1	other
Gnl3	0.0951632	0.131172	0.475	0.443	1	other
Cbx1	0.0302599	0.131146	0.529	0.468	1	other
Mfap3l	0.000985407	0.130982	0.183	0.085	1	other
Samd8	0.0612072	0.130891	0.494	0.438	1	other
AC160336.1	0.126213	0.130871	0.646	0.609	1	other
Cep126	0.0107902	0.130473	0.268	0.183	1	other
Eefsec	0.00156266	0.130276	0.276	0.162	1	other
Tle2	0.0118395	0.130209	0.241	0.166	1	other
Twistnb	0.0360907	0.130031	0.397	0.315	1	other
Hspa13	0.00855412	0.129469	0.665	0.583	1	other
Mga	0.0154115	0.129033	0.619	0.532	1	other
Arid4a	0.0356533	0.128944	0.778	0.749	1	other
Cxxc5	0.0409138	0.128535	0.315	0.243	1	other
Spata7	0.00118826	0.128365	0.72	0.574	1	other
Mpv17l	0.0110134	0.128353	0.436	0.34	1	other
Ubxn7	0.144285	0.128331	0.366	0.336	1	other
Rnf32	0.00128549	0.128252	0.175	0.085	1	other
Zfp446	0.000343507	0.128002	0.202	0.089	1	other
Tomm34	0.0141591	0.127998	0.436	0.349	1	other
Hspa5	0.0552291	0.127884	0.7	0.677	1	other
Vstm2b	0.0365704	0.127865	0.393	0.311	1	other
Zfp667	0.0202884	0.127423	0.346	0.268	1	other
Zfp266	0.0112676	0.127123	0.51	0.404	1	other
Polr2i	0.0393495	0.127106	0.447	0.379	1	other
Hadha	0.00334278	0.12706	0.37	0.247	1	other
Atraid	0.0370045	0.127024	0.479	0.413	1	other
Mthfsl	0.00532623	0.126984	0.237	0.145	1	other
Amer2	0.023602	0.126711	0.537	0.468	1	other
Arfgef3	0.0109119	0.126635	0.942	0.919	1	other
Dnmt3a	0.0127597	0.12661	0.615	0.511	1	other
Tesc	0.0090609	0.126401	0.191	0.111	1	other
Pfdn6	0.009223	0.126271	0.354	0.26	1	other
Fam98b	0.0152094	0.126252	0.366	0.272	1	other
Gm11808	0.0221758	0.126249	0.611	0.57	1	other
Cit	0.168188	0.126197	0.778	0.809	1	other
Cdh11	0.00827854	0.126146	0.268	0.179	1	other
Lipe	0.00256663	0.12559	0.241	0.136	1	other
Ncam1	0.00979848	0.125574	1	1	1	other
Rps23	2.69776e-05	0.125507	1	1	0.425302	other
Fuca1	0.057235	0.125323	0.241	0.183	1	other
Map2k1	0.0189668	0.125221	0.809	0.796	1	other
Fgfr1op2	0.0946323	0.125091	0.661	0.638	1	other
Yy1	0.00211032	0.124991	0.475	0.362	1	other
Amy1	0.0298869	0.124814	0.311	0.234	1	other
2810004N23Rik	0.0118917	0.124731	0.479	0.387	1	other
Cdv3	0.014538	0.124625	0.708	0.647	1	other
Supt5	0.0251831	0.12378	0.595	0.532	1	other
Hnrnpl	0.03557	0.123722	0.603	0.536	1	other
Mzt1	0.0137512	0.123651	0.677	0.617	1	other
Zfp24	0.00757463	0.123462	0.304	0.204	1	other
Ssr3	0.0211888	0.123399	0.732	0.719	1	other
Cst3	0.0108616	0.123291	0.755	0.749	1	other
Cfdp1	0.0205254	0.123244	0.638	0.579	1	other
Gm3448	9.62997e-05	0.123217	0.152	0.047	1	other
Smpd3	0.0264762	0.123142	0.339	0.251	1	other
Med28	0.0340594	0.12298	0.887	0.834	1	other
Ccnb1ip1	0.118744	0.122644	0.436	0.374	1	other
Nfkbia	0.0416341	0.122567	0.249	0.179	1	other
Arhgef1	0.00893628	0.122111	0.307	0.217	1	other
Pcm1	0.0162052	0.122099	0.665	0.557	1	other
Tmem132c	0.0655293	0.122078	0.109	0.064	1	other
Csnk2a1	0.00971824	0.122073	0.642	0.549	1	other
Aup1	0.00673487	0.121993	0.331	0.234	1	other
Rpgrip1	0.145973	0.121887	0.51	0.481	1	other
Rchy1	0.0081873	0.121846	0.661	0.545	1	other
Abhd17c	0.00155203	0.121827	0.226	0.119	1	other
Chmp5	0.054921	0.121698	0.607	0.553	1	other
Rpl5	0.00911727	0.121691	0.996	0.97	1	other
Crtac1	0.0343974	0.121688	0.276	0.204	1	other
Hmgn3	0.0595578	0.121565	0.755	0.723	1	other
Sfr1	0.0285924	0.121524	0.634	0.579	1	other
Kcnmb4	0.00511942	0.12148	0.249	0.153	1	other
Gm3764	0.00330884	0.12142	0.245	0.14	1	other
Sar1b	0.0209614	0.121374	0.374	0.294	1	other
Ckap5	0.00375753	0.121356	0.397	0.277	1	other
Npr2	0.0671463	0.121008	0.296	0.238	1	other
Sdhaf1	0.0100896	0.120803	0.405	0.302	1	other
Thyn1	0.00412195	0.120648	0.304	0.2	1	other
Agfg1	0.0232395	0.120303	0.479	0.404	1	other
Arl6ip6	0.00163054	0.120057	0.226	0.119	1	other
Fnbp1l	0.120918	0.120015	0.611	0.63	1	other
Mbp	0.00582442	0.119994	0.518	0.404	1	other
Dag1	0.0220876	0.119962	0.381	0.302	1	other
Phf3	0.0213043	0.119927	0.681	0.621	1	other
Sox3	0.000392877	0.11985	0.187	0.077	1	other
Cdc26	0.0168911	0.119705	0.49	0.413	1	other
Ube2e3	0.0074031	0.119656	0.506	0.387	1	other
Anp32e	0.00529139	0.119549	0.436	0.319	1	other
Elof1	0.0055194	0.119493	0.743	0.63	1	other
Naaa	0.0317343	0.119481	0.377	0.302	1	other
Gtf3c6	0.00360539	0.119013	0.28	0.179	1	other
Hmgb1	0.0172834	0.119009	0.872	0.872	1	other
Nlk	0.0285976	0.11899	0.405	0.328	1	other
Klhl29	0.0103829	0.118911	0.366	0.268	1	other
Myo10	0.0284077	0.118795	0.187	0.123	1	other
Itgav	0.000179083	0.118715	0.121	0.03	1	other
Kbtbd11	0.156433	0.118682	0.432	0.383	1	other
Lypd6	0.299738	0.118324	0.261	0.238	1	other
Crtc3	0.0061037	0.118128	0.311	0.213	1	other
Hadhb	0.0362736	0.117716	0.268	0.204	1	other
Bok	0.0027303	0.11756	0.268	0.162	1	other
Mrps14	0.00724083	0.117535	0.634	0.536	1	other
Rbm26	0.0041576	0.117503	0.584	0.489	1	other
Dgkz	0.00757188	0.11729	0.307	0.209	1	other
Uqcc3	0.026987	0.117282	0.467	0.4	1	other
Arpc5	0.00723024	0.11718	0.767	0.715	1	other
Rngtt	0.0437123	0.117179	0.405	0.349	1	other
Tigar	0.0606244	0.117034	0.319	0.26	1	other
Usp48	0.0348461	0.116872	0.424	0.336	1	other
Mgat5	0.0343283	0.116827	0.58	0.502	1	other
Zfp37	0.00637179	0.116806	0.327	0.217	1	other
Kpna3	0.0258592	0.11662	0.63	0.566	1	other
Pbx3	0.522816	0.116606	0.163	0.149	1	other
Zfp326	0.00582194	0.116491	0.416	0.319	1	other
H3f3b	0.00461112	0.116448	0.984	0.962	1	other
0610040B10Rik	0.0201252	0.116382	0.222	0.145	1	other
Mtf2	0.0101549	0.11633	0.56	0.451	1	other
Stk32a	0.0140428	0.116271	0.245	0.166	1	other
Gigyf2	0.0074497	0.116229	0.615	0.532	1	other
Tnpo1	0.0226428	0.116172	0.346	0.264	1	other
Gm16105	0.00324971	0.115954	0.21	0.111	1	other
Timm13	0.0332928	0.11575	0.751	0.677	1	other
Jam3	0.0256065	0.115634	0.475	0.383	1	other
Med21	0.0494115	0.115623	0.393	0.34	1	other
Med22	0.000581926	0.11562	0.198	0.089	1	other
Mid1ip1	0.05304	0.11562	0.463	0.387	1	other
Mlec	0.136794	0.115604	0.634	0.638	1	other
Gosr1	0.0291181	0.1155	0.327	0.247	1	other
Pcmtd1	0.038899	0.115442	0.611	0.536	1	other
Prdx2	0.031344	0.115297	0.665	0.613	1	other
Tmem29	0.0540545	0.115247	0.56	0.511	1	other
Maml3	0.00716885	0.11524	0.226	0.136	1	other
Smc3	0.0210007	0.115199	0.549	0.472	1	other
Kras	0.0675576	0.115011	0.63	0.613	1	other
Pgd	0.0109856	0.114739	0.331	0.238	1	other
Kdm5c	0.0131527	0.114483	0.335	0.251	1	other
Mpped2	0.0451462	0.114456	0.268	0.2	1	other
Mat2a	0.0789935	0.114259	0.844	0.821	1	other
Ttc14	0.0096234	0.114255	0.852	0.791	1	other
H3f3a	0.0471629	0.114186	0.802	0.74	1	other
Ube2q1	0.00530781	0.114163	0.595	0.502	1	other
Efhd2	0.0430918	0.114021	0.747	0.698	1	other
Trp53inp1	0.00418862	0.114004	0.21	0.115	1	other
Gphn	0.0207362	0.113947	0.482	0.387	1	other
Serpine2	0.0157741	0.113838	0.28	0.187	1	other
Prex1	0.00228416	0.113664	0.183	0.089	1	other
Snrpb	0.0167243	0.113649	0.35	0.264	1	other
1110032A03Rik	0.153402	0.11359	0.537	0.515	1	other
Smarcad1	0.00505484	0.113568	0.323	0.221	1	other
Sumo2	0.00311996	0.113557	0.969	0.936	1	other
Snhg10	0.0125808	0.113544	0.346	0.251	1	other
Mut	0.025654	0.113449	0.237	0.166	1	other
Clip1	0.0128423	0.113316	0.681	0.6	1	other
Kmt2e	0.0147854	0.113308	0.84	0.732	1	other
Atp1b3	0.210089	0.113302	0.728	0.74	1	other
Ppig	0.0203038	0.113035	0.891	0.847	1	other
Mast4	0.255423	0.113029	0.634	0.626	1	other
Triap1	0.0264491	0.113005	0.307	0.23	1	other
Npc1	0.0161274	0.113002	0.315	0.234	1	other
Usp30	0.0271755	0.112939	0.288	0.213	1	other
Nos1ap	0.0599359	0.112892	0.638	0.596	1	other
Trpc7	0.0236907	0.112765	0.226	0.153	1	other
Snhg11	3.81847e-06	0.112703	1	1	0.0604082	other
Apba1	0.0692025	0.11267	0.397	0.332	1	other
Fam229b	0.0320444	0.112588	0.327	0.255	1	other
Ndrg2	0.0735919	0.112372	0.319	0.26	1	other
Hdac6	0.016062	0.112232	0.241	0.162	1	other
Ypel1	0.0333254	0.112094	0.202	0.136	1	other
Lima1	0.00969068	0.111635	0.171	0.094	1	other
Ehmt1	0.0409852	0.111548	0.362	0.294	1	other
Ccdc112	0.0100572	0.111477	0.405	0.302	1	other
Sra1	0.0331268	0.111417	0.428	0.362	1	other
Kpnb1	0.101962	0.111391	0.72	0.647	1	other
Ddx50	0.0354547	0.111386	0.813	0.796	1	other
Smim26	0.0231928	0.111246	0.716	0.668	1	other
Timm9	0.0294392	0.111124	0.77	0.723	1	other
Sowaha	0.0230635	0.110978	0.171	0.106	1	other
Ethe1	0.001451	0.110882	0.195	0.094	1	other
Zfp157	0.0935576	0.11084	0.502	0.451	1	other
Nell1	0.408473	0.110681	0.475	0.477	1	other
Hdgfl3	0.0270152	0.110536	0.825	0.77	1	other
Tatdn1	0.0376564	0.110531	0.63	0.6	1	other
Trnt1	0.0674914	0.110456	0.358	0.306	1	other
Phf20l1	0.101253	0.110392	0.634	0.591	1	other
Kmt5c	0.00223964	0.110206	0.14	0.06	1	other
Rubcn	0.0390769	0.11013	0.405	0.332	1	other
Gm48855	0.00641858	0.11007	0.179	0.098	1	other
B230219D22Rik	0.0475809	0.109998	0.872	0.864	1	other
Prnp	0.0208771	0.10991	0.992	0.979	1	other
Ewsr1	0.0308967	0.109903	0.728	0.702	1	other
Aldh6a1	0.0412678	0.109859	0.268	0.2	1	other
Zxdc	0.00410482	0.109833	0.214	0.119	1	other
Kmt2c	0.0383436	0.109824	0.619	0.566	1	other
Mxd4	0.11934	0.109752	0.424	0.383	1	other
Kcnh7	0.00862642	0.10971	0.23	0.14	1	other
Polr2k	0.016952	0.109453	0.646	0.583	1	other
Zfp207	0.0999718	0.109438	0.619	0.6	1	other
Icam5	0.000247573	0.109143	0.144	0.047	1	other
Chd3os	0.0183832	0.10903	0.992	1	1	other
Ndufaf8	0.123812	0.109023	0.646	0.643	1	other
Cir1	0.0246227	0.108808	0.385	0.302	1	other
Zfhx4	0.00738933	0.108622	0.673	0.566	1	other
Mad2l2	0.0141919	0.108553	0.241	0.157	1	other
Cpne5	0.105207	0.108389	0.37	0.315	1	other
Tor1b	0.0620067	0.108354	0.292	0.238	1	other
Trim35	0.0592197	0.108322	0.879	0.894	1	other
H2-Q2	0.440506	0.108247	0.253	0.234	1	other
9930021J03Rik	0.0151669	0.10814	0.514	0.443	1	other
Gm13889	0.124049	0.10812	0.323	0.272	1	other
Tmem126a	0.0258474	0.108099	0.339	0.272	1	other
Rps6kb1	0.151293	0.107786	0.553	0.523	1	other
Hsbp1	0.138959	0.107776	0.911	0.915	1	other
Bub3	0.27583	0.107468	0.747	0.728	1	other
Golph3	0.0909359	0.107331	0.564	0.515	1	other
Nup98	0.00534403	0.10714	0.327	0.226	1	other
Thap2	0.0892434	0.107049	0.502	0.434	1	other
Gm44643	0.00156084	0.107004	0.233	0.123	1	other
Galnt10	0.00926424	0.106937	0.214	0.128	1	other
Cpsf6	0.0850557	0.106743	0.584	0.562	1	other
Cfap97	0.124676	0.106714	0.455	0.409	1	other
Ubn1	0.0159989	0.106513	0.362	0.272	1	other
Cdk2ap2	0.0314511	0.106415	0.272	0.196	1	other
Dnajb4	0.0388016	0.106278	0.712	0.66	1	other
Commd7	0.00564444	0.106262	0.354	0.247	1	other
Ldb2	0.0159164	0.106248	0.377	0.272	1	other
Rabl2	0.0252222	0.106042	0.35	0.264	1	other
Zfp9	0.0287348	0.106011	0.377	0.298	1	other
Nin	0.00602215	0.105927	0.222	0.128	1	other
Fbxo11	0.0819329	0.105911	0.626	0.591	1	other
Pcdh7	0.0549492	0.10591	0.891	0.881	1	other
Hdgfl2	0.0813136	0.105888	0.397	0.328	1	other
Smim11	0.0107275	0.105865	0.393	0.285	1	other
Ddx17	0.120687	0.105645	0.84	0.809	1	other
Rpl30	0.00110945	0.105558	1	0.991	1	other
Sybu	0.100097	0.105524	0.611	0.591	1	other
Faim	0.0641561	0.105475	0.401	0.34	1	other
Tm9sf2	0.141095	0.105463	0.693	0.672	1	other
Serf1	0.0662689	0.105387	0.521	0.481	1	other
Rsbn1	0.0235883	0.105308	0.486	0.43	1	other
Ppm1l	0.07759	0.105151	0.58	0.519	1	other
Ormdl3	0.150829	0.105136	0.463	0.413	1	other
Pcdh10	0.0237541	0.105117	0.79	0.749	1	other
Emc2	0.0833154	0.104899	0.311	0.26	1	other
Oxtr	0.00032055	0.104885	0.074	0.009	1	other
Pls3	0.0400925	0.104853	0.385	0.311	1	other
Ndufs1	0.0298468	0.104653	0.416	0.332	1	other
Rbm7	0.00969955	0.104562	0.374	0.268	1	other
Smarce1	0.0112546	0.104546	0.44	0.336	1	other
Rpl13a	0.0046899	0.10452	0.984	0.991	1	other
Lin37	0.0105125	0.104465	0.272	0.179	1	other
Tmem209	0.00926372	0.104463	0.23	0.145	1	other
Krr1	0.0508209	0.10443	0.37	0.315	1	other
Plpp5	0.00393888	0.104346	0.175	0.089	1	other
Tmem108	0.164573	0.104309	0.451	0.417	1	other
Safb	0.0412884	0.104183	0.506	0.447	1	other
Smarcd3	0.0218286	0.104041	0.591	0.523	1	other
Cebpzos	0.0720607	0.104004	0.475	0.413	1	other
Tbcel	0.0412504	0.103981	0.339	0.268	1	other
Araf	0.00187387	0.103966	0.977	0.953	1	other
Nbeal1	0.0728364	0.103831	0.467	0.421	1	other
Syncrip	0.0801	0.103741	0.451	0.391	1	other
Olfr655	0.0668709	0.103737	0.039	0.013	1	other
Faf2	0.023018	0.103699	0.389	0.306	1	other
Pdap1	0.0140704	0.103673	0.848	0.826	1	other
Fcor	0.000647424	0.103665	0.156	0.06	1	other
Arid1a	0.0861147	0.103662	0.704	0.66	1	other
Otud6b	0.0515534	0.103614	0.498	0.438	1	other
Gm2000	0.0495607	0.103462	0.568	0.494	1	other
Ric8b	0.112201	0.103398	0.486	0.443	1	other
Stmn1	0.0159425	0.103374	0.93	0.936	1	other
Ak6	0.0108592	0.103286	0.284	0.183	1	other
Celf3	0.0470177	0.103236	0.681	0.63	1	other
Cdkl2	0.0573419	0.103094	0.626	0.549	1	other
Bclaf3	0.00572814	0.103084	0.214	0.123	1	other
Igdcc4	0.0318821	0.103055	0.397	0.315	1	other
Zfp931	0.00244866	0.103006	0.206	0.106	1	other
Eif5b	0.0278856	0.102981	0.837	0.843	1	other
Ttll7	0.0303308	0.102959	0.576	0.511	1	other
Hnrnpab	0.0251811	0.10283	0.739	0.685	1	other
Gna13	0.0470463	0.102719	0.288	0.213	1	other
Rev1	0.177507	0.102685	0.416	0.391	1	other
Pex5l	0.0130831	0.10263	0.346	0.247	1	other
Tmem163	0.0170838	0.102622	0.14	0.077	1	other
Tmem106b	0.0527329	0.102585	0.72	0.689	1	other
Abhd16a	0.0837693	0.10258	0.323	0.26	1	other
Hdac1	0.0719229	0.102516	0.249	0.196	1	other
Vamp7	0.106495	0.102354	0.358	0.311	1	other
Arhgap5	0.127339	0.102315	0.591	0.549	1	other
Rbbp7	0.172154	0.102295	0.584	0.574	1	other
Trove2	0.0967537	0.102165	0.556	0.502	1	other
Ago2	0.0870431	0.102162	0.739	0.732	1	other
Nabp2	0.0486995	0.102148	0.463	0.383	1	other
Pbrm1	0.0212954	0.102101	0.817	0.745	1	other
Ahdc1	0.0795403	0.102047	0.494	0.455	1	other
Polr2g	0.0518726	0.101953	0.607	0.545	1	other
1700023F06Rik	0.0184369	0.101873	0.459	0.37	1	other
Acaca	0.248602	0.101782	0.502	0.485	1	other
Numa1	0.139561	0.101693	0.486	0.451	1	other
Uros	0.0426047	0.101579	0.187	0.128	1	other
Flrt2	0.20892	0.10156	0.323	0.285	1	other
Gse1	0.0602537	0.101518	0.588	0.536	1	other
Jarid2	0.0583563	0.10146	0.377	0.306	1	other
Twsg1	0.0203955	0.101456	0.198	0.128	1	other
Nicn1	0.046647	0.101456	0.696	0.66	1	other
Clk4	0.0850851	0.101443	0.362	0.311	1	other
Rnf7	0.0722956	0.10142	0.805	0.774	1	other
Heca	0.0233804	0.101371	0.265	0.187	1	other
Mon2	0.0301143	0.101284	0.424	0.34	1	other
Cers5	0.0689585	0.101261	0.346	0.281	1	other
Ankra2	0.280545	0.101224	0.611	0.609	1	other
Pdia3	0.0401047	0.101222	0.584	0.54	1	other
Bag1	0.027947	0.101201	0.907	0.889	1	other
Bhlhb9	0.0508741	0.101074	0.405	0.328	1	other
Caml	0.0373052	0.101057	0.292	0.217	1	other
Krt10	0.130519	0.101009	0.319	0.272	1	other
Paxbp1	0.0338262	0.100912	0.409	0.34	1	other
Morf4l2	0.0147308	0.10087	0.922	0.902	1	other
Fam173a	0.0486355	0.100822	0.658	0.626	1	other
Cetn2	0.0408063	0.100676	0.471	0.366	1	other
Slco3a1	0.0180835	0.100631	0.35	0.255	1	other
Znrf1	0.13072	0.100514	0.498	0.46	1	other
Csnk1g1	0.0614298	0.100376	0.366	0.298	1	other
Aqp5	6.15705e-05	0.100299	0.066	0	0.968873	other
1110017D15Rik	0.0145558	0.100288	0.23	0.145	1	other
Arid5b	0.0675494	0.100199	0.346	0.272	1	other
Rev3l	0.179316	0.100192	0.486	0.451	1	other
Tmem107	0.00779377	0.100069	0.261	0.162	1	other
Slc17a8	0.0084604	0.100043	0.086	0.03	1	other
Washc5	0.0202097	0.100036	0.226	0.149	1	other
Klhl7	0.0920514	0.0999523	0.642	0.6	1	other
Sbf2	0.0487308	0.0999303	0.475	0.413	1	other
Grcc10	0.0205353	0.0998758	0.389	0.302	1	other
Timm22	0.0582785	0.0997908	0.346	0.277	1	other
Rsph9	0.00541249	0.0995927	0.175	0.094	1	other
Matr3	0.0138311	0.0995774	0.988	0.966	1	other
Uba5	0.0447444	0.0995035	0.502	0.417	1	other
Itch	0.117383	0.0995005	0.486	0.438	1	other
Kansl1	0.0848331	0.0994339	0.479	0.404	1	other
BC022687	0.00207729	0.0994264	0.175	0.085	1	other
Iqcb1	0.15631	0.0993147	0.366	0.336	1	other
Sbds	0.040829	0.0991538	0.377	0.298	1	other
Fbxw5	0.0125915	0.0988746	0.389	0.289	1	other
Ankrd6	0.0504234	0.0987944	0.506	0.438	1	other
Gprasp2	0.0251469	0.0987836	0.977	0.953	1	other
Fam162a	0.0168851	0.0987268	0.292	0.2	1	other
Ahsa1	0.292275	0.098665	0.486	0.485	1	other
Bcas2	0.0570252	0.0986108	0.642	0.604	1	other
Btbd11	0.0840939	0.0986016	0.502	0.421	1	other
Dgkd	0.141013	0.0984378	0.416	0.366	1	other
Pcdhb7	0.0210822	0.0984363	0.105	0.051	1	other
Dhx15	0.113023	0.0983595	0.424	0.379	1	other
Avpi1	0.0399664	0.098314	0.191	0.128	1	other
Zfp275	0.0595491	0.0982978	0.49	0.413	1	other
Csnk1g3	0.0377466	0.097931	0.506	0.438	1	other
Esf1	0.180516	0.0978718	0.409	0.362	1	other
Tlk1	0.0774364	0.0978419	0.436	0.379	1	other
Arf4	0.00952882	0.0977873	0.685	0.634	1	other
Mrpl14	0.021841	0.0977853	0.307	0.221	1	other
Gm6710	0.00869624	0.0976706	0.21	0.123	1	other
Cabin1	0.0895516	0.0976442	0.49	0.43	1	other
Nudcd2	0.126437	0.0976097	0.362	0.315	1	other
Rpl27-ps3	0.0584997	0.097592	0.397	0.328	1	other
Banp	0.187568	0.0975197	0.311	0.277	1	other
Polr3gl	0.0328375	0.0972144	0.288	0.213	1	other
Rnf111	0.0274141	0.0972133	0.319	0.243	1	other
Tnrc6b	0.027937	0.0971775	0.747	0.655	1	other
Cd2ap	0.0234068	0.0971477	0.268	0.183	1	other
Rnf113a2	0.0170866	0.0970935	0.23	0.153	1	other
Rbpj	0.0172261	0.0970761	0.28	0.196	1	other
Sgms1	0.0567857	0.0970445	0.311	0.247	1	other
Mbd5	0.0340969	0.0969904	0.455	0.379	1	other
Slc38a2	0.133237	0.096987	0.615	0.574	1	other
Zfp329	0.05588	0.0969785	0.564	0.511	1	other
Sesn1	0.0205013	0.0968537	0.288	0.2	1	other
Oscp1	0.0724133	0.0967022	0.354	0.298	1	other
Kit	0.0273402	0.096618	0.148	0.085	1	other
Pibf1	0.0128727	0.096562	0.218	0.136	1	other
Erp29	0.0277276	0.0964946	0.856	0.821	1	other
Fam210a	0.00906871	0.0964228	0.268	0.17	1	other
Gabra4	0.0235624	0.0964008	0.346	0.26	1	other
Fam241b	0.0438269	0.0962622	0.339	0.26	1	other
Sltm	0.118084	0.0961332	0.677	0.63	1	other
Hspe1	0.0140464	0.0960434	0.949	0.945	1	other
Rab27a	0.0232209	0.0960241	0.245	0.166	1	other
Fgd3	0.007402	0.0960125	0.101	0.038	1	other
Pttg1ip	0.00953109	0.0960087	0.175	0.098	1	other
Dot1l	0.0268209	0.0959939	0.253	0.179	1	other
Cept1	0.0488221	0.0958465	0.354	0.285	1	other
Celf2	0.0990033	0.0958163	0.887	0.86	1	other
Ccdc34	0.0562064	0.0958087	0.518	0.443	1	other
Zfp821	0.368555	0.0957555	0.288	0.272	1	other
Rgs10	0.0682249	0.0957381	0.872	0.826	1	other
Bet1l	0.0953269	0.0957351	0.304	0.251	1	other
Spg21	0.00490217	0.0956826	0.288	0.179	1	other
Socs4	0.01832	0.0956822	0.195	0.119	1	other
Kdm5b	0.133658	0.0956022	0.444	0.409	1	other
Nr2f6	0.0641455	0.0955828	0.198	0.14	1	other
Ttc9b	0.0407821	0.0954276	0.553	0.498	1	other
Pou2f2	0.337981	0.095418	0.58	0.579	1	other
4933427D14Rik	0.0156365	0.0952958	0.265	0.174	1	other
C230004F18Rik	0.0634242	0.0952902	0.677	0.6	1	other
Dek	0.0656404	0.0952628	0.549	0.506	1	other
Snrpc	0.0885545	0.0952469	0.253	0.2	1	other
Erlin1	0.0235024	0.0952361	0.195	0.123	1	other
Gtf3c3	0.189458	0.0952276	0.327	0.294	1	other
Plekha1	0.112753	0.0951876	0.358	0.298	1	other
Eid2b	0.0688025	0.0951675	0.261	0.2	1	other
Eif1	0.00510058	0.0950453	1	0.991	1	other
N4bp2	0.0620428	0.0950207	0.42	0.362	1	other
Ankrd26	0.0293623	0.0948828	0.358	0.26	1	other
Chmp1b	0.0199913	0.0948382	0.21	0.132	1	other
Pde3b	0.00798856	0.0948033	0.175	0.094	1	other
Cfl2	0.054348	0.0947957	0.829	0.791	1	other
Nap1l5	0.00205501	0.0946587	0.992	1	1	other
Brd3	0.0896758	0.0945371	0.642	0.626	1	other
Mrpl9	0.116584	0.0944962	0.292	0.247	1	other
Usp16	0.087101	0.0944287	0.311	0.255	1	other
Zfp846	0.100356	0.0942981	0.591	0.566	1	other
Etaa1	0.017346	0.0940068	0.167	0.098	1	other
Lsm8	0.057103	0.0938912	0.249	0.187	1	other
Rab22a	0.116656	0.0937385	0.327	0.285	1	other
Scp2	0.080567	0.093585	0.42	0.362	1	other
Rasgrp1	0.00719369	0.0935843	0.276	0.174	1	other
Yipf3	0.0195203	0.0934213	0.226	0.149	1	other
Timm10	0.0100362	0.0933999	0.385	0.285	1	other
Dhx9	0.199446	0.0933454	0.475	0.451	1	other
Fcho2	0.0166334	0.0933305	0.296	0.209	1	other
Api5	0.0500316	0.0932315	0.42	0.349	1	other
Tyms	0.0947326	0.0932257	0.144	0.098	1	other
Psma3	0.0660963	0.093224	0.852	0.838	1	other
Zfp952	0.0108756	0.0931801	0.253	0.157	1	other
Rbm28	0.0644548	0.0931629	0.342	0.272	1	other
Cpox	0.143764	0.0931525	0.409	0.357	1	other
Zcchc10	0.0462079	0.093032	0.241	0.179	1	other
Gm9493	0.230137	0.0929961	0.44	0.413	1	other
Rab36	0.0570347	0.0928362	0.525	0.447	1	other
Zmym3	0.0511961	0.0928334	0.696	0.638	1	other
Prr13	0.15031	0.0928279	0.533	0.494	1	other
Ring1	0.046049	0.0927293	0.444	0.37	1	other
Stx5a	0.065693	0.0927023	0.514	0.434	1	other
Washc4	0.0635106	0.0926197	0.339	0.268	1	other
Sox1	0.012585	0.0925333	0.249	0.157	1	other
Bmi1	0.0882098	0.0925001	0.401	0.345	1	other
Rex1bd	0.0173282	0.0923768	0.739	0.689	1	other
Senp8	0.0858815	0.0923614	0.253	0.196	1	other
Chuk	0.0759842	0.0923186	0.447	0.396	1	other
Mbtd1	0.100046	0.092277	0.42	0.37	1	other
N6amt1	0.0261659	0.0922658	0.358	0.264	1	other
P4ha1	0.0487806	0.0922194	0.249	0.179	1	other
Actl6a	0.0770315	0.092216	0.374	0.328	1	other
Npy1r	0.0593896	0.092085	0.311	0.234	1	other
Ccnl1	0.337621	0.0919905	0.518	0.519	1	other
Atp6v0b	0.053244	0.0918278	0.883	0.889	1	other
Dgkk	0.232412	0.0916836	0.444	0.4	1	other
Atf6b	0.0424542	0.0916617	0.253	0.187	1	other
Mindy2	0.055285	0.091605	0.568	0.532	1	other
Tob1	0.0363729	0.0915936	0.331	0.255	1	other
Unc119	0.0524359	0.0915765	0.366	0.311	1	other
Nxf1	0.0338285	0.0914761	0.63	0.574	1	other
Csad	0.0773208	0.0914314	0.276	0.213	1	other
Cd3eap	0.0768442	0.0914105	0.268	0.213	1	other
Slc50a1	0.0239872	0.091347	0.358	0.264	1	other
Atp13a3	0.114385	0.0912428	0.389	0.34	1	other
Riiad1	0.249806	0.0910561	0.327	0.294	1	other
Cnrip1	0.108301	0.0910047	0.763	0.672	1	other
Fpgt	0.0639767	0.0909623	0.198	0.145	1	other
Pak7	0.267691	0.090937	0.428	0.396	1	other
Sf3b5	0.12833	0.0909151	0.315	0.268	1	other
Ptk2	0.0896572	0.0908878	0.339	0.281	1	other
Hook1	0.027353	0.0908017	0.611	0.515	1	other
Znrf3	0.00306766	0.090769	0.167	0.081	1	other
Siva1	0.029416	0.090748	0.311	0.221	1	other
Adal	0.0117228	0.0907309	0.156	0.085	1	other
Zfyve27	0.0986765	0.0907288	0.424	0.362	1	other
Cacna2d2	0.0595846	0.0907268	0.743	0.749	1	other
Ift46	0.05826	0.0907187	0.315	0.243	1	other
Stt3a	0.0582626	0.0906103	0.416	0.345	1	other
Plod3	0.0341367	0.0905609	0.183	0.119	1	other
Zdhhc14	0.0581985	0.0905526	0.191	0.132	1	other
Kdm6b	0.206401	0.0904373	0.393	0.353	1	other
Smarcc1	0.0735453	0.0904294	0.634	0.587	1	other
Shisa9	0.126829	0.0903743	0.549	0.485	1	other
Mrps17	0.328173	0.0902369	0.447	0.443	1	other
Unc80	0.0230767	0.0902168	0.946	0.915	1	other
Spag1	0.0209422	0.0902115	0.183	0.111	1	other
Arpc5l	0.0356875	0.0901819	0.798	0.736	1	other
Chfr	0.0891575	0.0901599	0.374	0.315	1	other
Ubac2	0.0297677	0.0901361	0.339	0.251	1	other
Chchd5	0.0289793	0.090127	0.3	0.213	1	other
Peli1	0.189198	0.0900792	0.405	0.37	1	other
Efna3	0.089621	0.0900728	0.218	0.166	1	other
Cdh8	0.0919535	0.0900391	0.385	0.315	1	other
Gabrg3	0.319123	0.09002	0.556	0.545	1	other
Kdm2b	0.091877	0.0900198	0.245	0.191	1	other
Plppr3	0.112767	0.0900116	0.553	0.519	1	other
Lamtor4	0.176556	0.0899245	0.533	0.515	1	other
Trpm4	0.0116639	0.0899052	0.214	0.128	1	other
Cldnd1	0.164596	0.0898892	0.521	0.498	1	other
Uqcc2	0.0757834	0.0898874	0.891	0.902	1	other
Rnf6	0.19547	0.0898602	0.475	0.455	1	other
Tmed2	0.185378	0.0898309	0.728	0.719	1	other
Tet2	0.178117	0.0897157	0.307	0.277	1	other
P4hb	0.0470233	0.089614	0.564	0.515	1	other
Polr3d	0.0186944	0.0893952	0.21	0.132	1	other
Sdcbp	0.206706	0.0892772	0.665	0.643	1	other
4833439L19Rik	0.116966	0.0892671	0.607	0.587	1	other
Rcbtb1	0.0607436	0.0891131	0.335	0.268	1	other
Cntnap5a	0.646977	0.0891112	0.475	0.481	1	other
Preb	0.0991084	0.0890995	0.339	0.298	1	other
Pum2	0.0734572	0.0890806	0.778	0.753	1	other
Cox20	0.064977	0.0889176	0.51	0.434	1	other
BC051226	0.0227442	0.0889038	0.198	0.128	1	other
Pds5b	0.219976	0.0888683	0.732	0.723	1	other
Tvp23b	0.118765	0.0888547	0.335	0.289	1	other
Unc5c	0.101721	0.0888487	0.401	0.349	1	other
Slc27a1	0.00814141	0.0888087	0.206	0.115	1	other
P3h3	0.0637184	0.0887946	0.327	0.247	1	other
Rcc2	0.0879767	0.0887528	0.397	0.345	1	other
Atp5g1	0.0607163	0.0886297	0.837	0.821	1	other
Bicra	0.000874562	0.0885844	0.113	0.034	1	other
Etfb	0.0271889	0.0885652	0.183	0.119	1	other
Anapc13	0.24068	0.0885475	0.545	0.523	1	other
Hmx3	0.00365005	0.0885472	0.167	0.081	1	other
Zfp941	0.204963	0.0885004	0.475	0.447	1	other
Npy5r	0.0638841	0.0884804	0.167	0.115	1	other
Dnaja1	0.0659392	0.0884155	0.922	0.872	1	other
C1qtnf4	0.315677	0.0883923	0.58	0.596	1	other
Slf1	0.0421812	0.0883601	0.366	0.294	1	other
Sdc2	0.117711	0.0883246	0.389	0.345	1	other
Cep41	0.0153237	0.0881786	0.16	0.089	1	other
Ahi1	0.000476655	0.0881655	1	1	1	other
Arf6	0.0269701	0.0881088	0.241	0.166	1	other
Polr2e	0.0615349	0.088047	0.366	0.298	1	other
Zdhhc23	0.0143888	0.0879577	0.187	0.111	1	other
Snrpg	0.0844656	0.0879507	0.7	0.626	1	other
Gtf2h5	0.0626635	0.0878375	0.689	0.638	1	other
Tmem185b	0.0912657	0.087826	0.16	0.115	1	other
Med13l	0.132164	0.0878226	0.506	0.443	1	other
Ank3	0.0430896	0.0876507	0.942	0.936	1	other
Ccdc174	0.153571	0.0875842	0.502	0.451	1	other
Snx30	0.1982	0.0875622	0.486	0.447	1	other
Rap2c	0.0325628	0.0875047	0.253	0.183	1	other
Oaz1	0.00639188	0.0874937	1	1	1	other
Sf3b3	0.103316	0.0874931	0.588	0.574	1	other
Prcp	0.00570341	0.087476	0.179	0.089	1	other
Gtf2a2	0.0996334	0.0874612	0.537	0.472	1	other
Trappc2l	0.0334884	0.0874491	0.693	0.626	1	other
Dab1	0.0502873	0.0874474	0.362	0.289	1	other
Dscaml1	0.0221278	0.0873897	0.226	0.145	1	other
Tmem229b	0.0482066	0.0873473	0.175	0.115	1	other
St13	0.320832	0.0873468	0.837	0.86	1	other
Gtf3a	0.0802959	0.087312	0.331	0.264	1	other
Ndufb2	0.0556696	0.0873053	0.798	0.736	1	other
Xiap	0.168665	0.087214	0.576	0.574	1	other
Rab28	0.0563314	0.0872075	0.661	0.574	1	other
Phf21a	0.0660119	0.0872029	0.342	0.285	1	other
Gtf2ird1	0.101499	0.0871719	0.346	0.302	1	other
Srp72	0.0319786	0.0871716	0.72	0.643	1	other
Enc1	0.0842018	0.0870746	0.72	0.638	1	other
Erc1	0.0795531	0.0870097	0.44	0.404	1	other
Gm4419	0.00149556	0.0869167	0.101	0.03	1	other
Nnat	0.321324	0.0868748	0.798	0.783	1	other
Nucb2	0.0542549	0.0868376	0.268	0.2	1	other
Ikzf5	0.0976456	0.0867694	0.307	0.255	1	other
Mxra7	0.0663069	0.0867285	0.253	0.183	1	other
Tbc1d5	0.0262852	0.0867232	0.16	0.094	1	other
Itfg2	0.0613238	0.0867169	0.494	0.434	1	other
Tgfbr1	0.0322924	0.0867104	0.152	0.094	1	other
Ccnt2	0.0764411	0.0867007	0.798	0.762	1	other
Cacng5	0.262706	0.0866759	0.179	0.145	1	other
Ssbp1	0.131554	0.086654	0.358	0.294	1	other
Tmod1	0.188597	0.0866086	0.292	0.255	1	other
Stx6	0.0549848	0.0865499	0.327	0.26	1	other
Pak6	0.249833	0.0864497	0.401	0.379	1	other
Lypd1	0.0387573	0.0863789	0.44	0.34	1	other
Ptch1	0.0301052	0.0863605	0.253	0.174	1	other
Lrrtm2	0.32842	0.0863324	0.506	0.502	1	other
Xpo7	0.114718	0.0863087	0.506	0.443	1	other
Dnajb2	0.0598085	0.0862168	0.518	0.468	1	other
4933404O12Rik	0.0053537	0.0861956	0.132	0.06	1	other
Blmh	0.151023	0.0861943	0.498	0.46	1	other
Commd8	0.194692	0.0861773	0.479	0.464	1	other
Nrg1	0.0223744	0.0861416	0.171	0.102	1	other
Rprd1a	0.190141	0.0861102	0.615	0.6	1	other
2700069I18Rik	0.00174404	0.086055	0.128	0.047	1	other
Fmc1	0.0734137	0.086028	0.28	0.221	1	other
Bend4	0.022888	0.0860085	0.132	0.072	1	other
2300009A05Rik	0.142987	0.0859919	0.584	0.536	1	other
Eif4g2	0.031039	0.0859865	0.984	0.974	1	other
Fbxl3	0.0548009	0.0859775	0.296	0.23	1	other
Cbln2	0.274568	0.0859674	0.14	0.183	1	other
Mtmr4	0.236426	0.0858988	0.514	0.481	1	other
Ercc4	0.10263	0.085774	0.175	0.128	1	other
Hsp90aa1	0.0125526	0.0857519	0.984	0.974	1	other
Gm26917	0.253795	0.0856811	0.65	0.626	1	other
Cd164	0.277319	0.0855789	0.405	0.379	1	other
Setd5	0.137372	0.0855542	0.611	0.562	1	other
Fnip1	0.0622726	0.0855037	0.323	0.255	1	other
B230307C23Rik	0.0037388	0.0854523	0.105	0.038	1	other
Lap3	0.0314428	0.0854211	0.175	0.111	1	other
Snrpa	0.0637396	0.0853224	0.265	0.2	1	other
Slit2	0.0254532	0.0852756	0.175	0.106	1	other
Zfp664	0.459724	0.0851936	0.545	0.549	1	other
Gm973	0.00051552	0.0851427	0.07	0.009	1	other
Ttf1	0.0386399	0.0850645	0.191	0.128	1	other
Snx3	0.0422492	0.0850314	0.696	0.634	1	other
Creld2	0.00399822	0.0849356	0.179	0.089	1	other
Pdlim7	0.0697258	0.0848382	0.475	0.4	1	other
Naf1	0.0171774	0.084799	0.202	0.123	1	other
Acvr2a	0.042228	0.084678	0.342	0.264	1	other
Ice1	0.0853905	0.0846644	0.412	0.345	1	other
Dusp18	0.0518237	0.0846447	0.253	0.183	1	other
Elob	0.0612792	0.0845105	0.899	0.809	1	other
Dars	0.207342	0.0843885	0.319	0.285	1	other
Ttpal	0.0599394	0.084346	0.307	0.243	1	other
Abhd17b	0.106959	0.08434	0.381	0.323	1	other
Rsph4a	0.0760451	0.0843363	0.136	0.089	1	other
Bbs5	0.0315992	0.0843324	0.187	0.123	1	other
Sypl	0.0700493	0.0843108	0.311	0.247	1	other
Bud23	0.0573227	0.0842433	0.28	0.209	1	other
Sgk1	0.0099402	0.0842062	0.121	0.055	1	other
Rgs20	0.021648	0.0841754	0.152	0.085	1	other
Grb14	0.00455604	0.084153	0.136	0.06	1	other
Orc6	0.0430003	0.084142	0.323	0.247	1	other
Gprasp1	0.0140409	0.0841186	0.988	0.979	1	other
Fam222b	0.276671	0.0840967	0.261	0.234	1	other
4732440D04Rik	0.0177741	0.0840197	0.109	0.051	1	other
Stambpl1	0.0293996	0.0838955	0.128	0.072	1	other
Kdm1a	0.065671	0.0838743	0.37	0.281	1	other
Uxs1	0.140908	0.0837953	0.276	0.234	1	other
Wdr34	0.130257	0.083785	0.327	0.277	1	other
Trappc2	0.0691591	0.0837578	0.432	0.37	1	other
Chic2	0.0801423	0.0837434	0.405	0.34	1	other
Agps	0.110474	0.0837145	0.296	0.243	1	other
Ehbp1l1	0.0759156	0.0837114	0.346	0.285	1	other
Rhoa	0.0820151	0.083677	0.654	0.63	1	other
Kantr	0.130088	0.0836445	0.724	0.715	1	other
Ypel3	0.120851	0.0836442	0.833	0.838	1	other
Gnpnat1	0.0309608	0.0835399	0.249	0.17	1	other
Cspp1	0.0143486	0.0835247	0.56	0.455	1	other
Cdc14a	0.00586702	0.0834784	0.101	0.038	1	other
Rbmxl1	0.0706088	0.0834401	0.311	0.247	1	other
Ankrd10	0.063332	0.0834184	0.494	0.417	1	other
Csnk1e	0.48796	0.0834005	0.595	0.621	1	other
Txndc11	0.152038	0.0833569	0.307	0.268	1	other
Slc16a2	0.00363723	0.0833298	0.167	0.081	1	other
Setd1b	0.132756	0.0833093	0.366	0.328	1	other
Emsy	0.142735	0.0832911	0.518	0.46	1	other
Hikeshi	0.0969327	0.0832678	0.304	0.251	1	other
Ppp2r3d	0.0619263	0.0832335	0.276	0.213	1	other
Cdc5l	0.178296	0.0832261	0.288	0.251	1	other
1600014C10Rik	0.10734	0.0832099	0.288	0.238	1	other
Fbxl6	0.0110518	0.0831905	0.187	0.106	1	other
Eny2	0.0950477	0.0831546	0.65	0.604	1	other
Rmst	0.0422747	0.0831395	0.743	0.621	1	other
Zfp62	0.0867733	0.0830958	0.202	0.149	1	other
Casp8ap2	0.0402027	0.0830636	0.206	0.14	1	other
Ccdc88a	0.136194	0.0830397	0.677	0.672	1	other
Txn2	0.368577	0.0830296	0.549	0.523	1	other
Sun1	0.171526	0.083018	0.342	0.302	1	other
Ank2	0.0386088	0.083011	0.984	0.97	1	other
Sh3bgrl	0.151575	0.0829794	0.389	0.349	1	other
Tecpr1	0.0880668	0.0829698	0.65	0.57	1	other
Eaf1	0.0540334	0.0829418	0.183	0.128	1	other
Ttc9	0.0567078	0.0828976	0.44	0.349	1	other
Vps9d1	0.149698	0.0828401	0.315	0.285	1	other
Zfp451	0.18942	0.0828309	0.642	0.6	1	other
Plxnc1	0.0904802	0.0828093	0.693	0.617	1	other
Brinp1	0.0743828	0.0827906	0.459	0.387	1	other
Shd	0.0570391	0.0827788	0.393	0.319	1	other
Coq4	0.0947465	0.0827222	0.226	0.174	1	other
Rplp2	0.00828292	0.0825704	1	0.996	1	other
Knop1	0.103421	0.0825454	0.444	0.374	1	other
Tmed7	0.115787	0.0825186	0.689	0.626	1	other
Col4a1	0.00570296	0.0825174	0.121	0.051	1	other
Ldah	0.113206	0.0823486	0.265	0.204	1	other
Sf3b1	0.111167	0.0823481	0.755	0.753	1	other
Slc39a6	0.137226	0.0823212	0.533	0.477	1	other
Gm34466	0.000248688	0.0821501	0.066	0.004	1	other
Itpkb	0.0244023	0.0821392	0.144	0.081	1	other
Neto2	0.429618	0.0821295	0.362	0.345	1	other
Elavl1	0.194876	0.0821295	0.486	0.443	1	other
Srsf9	0.0616766	0.0821284	0.401	0.345	1	other
Mrpl57	0.102216	0.0820792	0.518	0.455	1	other
Plxnb1	0.0224117	0.082076	0.202	0.128	1	other
Prpf40b	0.0769823	0.0820728	0.331	0.268	1	other
Fjx1	0.00309714	0.0820427	0.121	0.047	1	other
Zfp60	0.0377146	0.0820177	0.272	0.196	1	other
Ubl5	0.0569966	0.0819016	0.879	0.851	1	other
Btg3	0.00584737	0.0819005	0.136	0.06	1	other
Rpl27	0.108224	0.0818982	0.946	0.966	1	other
Irf2bp1	0.396333	0.0818624	0.288	0.264	1	other
Zfp560	0.140844	0.0818415	0.447	0.409	1	other
Ankfy1	0.091159	0.0817506	0.319	0.268	1	other
Cep170	0.0507682	0.0817493	0.611	0.54	1	other
Rbbp8	0.0269056	0.0817104	0.086	0.038	1	other
Arrb2	0.113395	0.0815891	0.288	0.234	1	other
Gpr85	0.0492516	0.0815063	0.494	0.391	1	other
Dusp11	0.0730635	0.0815017	0.416	0.353	1	other
Traf7	0.0131748	0.0814902	0.175	0.102	1	other
Myadm	0.0470384	0.0814815	0.249	0.179	1	other
Spen	0.0713297	0.0814429	0.222	0.162	1	other
Nfat5	0.269133	0.0813958	0.498	0.468	1	other
Med8	0.0813858	0.0813593	0.276	0.217	1	other
Mtmr9	0.215081	0.0813572	0.37	0.362	1	other
Trpc1	0.226505	0.0813336	0.319	0.289	1	other
Nagk	0.0404428	0.0813308	0.759	0.723	1	other
Seh1l	0.0794986	0.0812796	0.331	0.268	1	other
Higd1a	0.241842	0.0812648	0.576	0.549	1	other
Srsf10	0.0361385	0.0812435	0.724	0.664	1	other
Ccdc39	0.029836	0.0812123	0.241	0.162	1	other
Sf3b6	0.0366916	0.0811533	0.424	0.34	1	other
Mrpl35	0.0881702	0.0810707	0.268	0.221	1	other
Naa50	0.120725	0.0808504	0.661	0.587	1	other
Snx29	0.111333	0.0808039	0.163	0.119	1	other
Rock1	0.0687552	0.0807784	0.249	0.183	1	other
Ppa2	0.128221	0.0807298	0.288	0.234	1	other
Hook3	0.0886777	0.0806922	0.708	0.668	1	other
Sgip1	0.197299	0.0806701	0.852	0.821	1	other
Zcchc7	0.248031	0.0806522	0.584	0.54	1	other
Dcaf1	0.140796	0.0805028	0.28	0.23	1	other
Ctdspl2	0.0799178	0.0804346	0.311	0.255	1	other
Gm14295	0.0798156	0.0803413	0.218	0.162	1	other
Fam135a	0.109332	0.0803376	0.21	0.162	1	other
Map3k2	0.106727	0.0803145	0.358	0.306	1	other
Tspan7	0.0194465	0.0802955	0.992	0.991	1	other
Unc50	0.0334205	0.0802799	0.21	0.14	1	other
Gria2	0.0319166	0.0802441	1	0.991	1	other
Sos2	0.255423	0.0801933	0.381	0.336	1	other
Pum1	0.196584	0.0801179	0.689	0.698	1	other
Tmem216	0.0214641	0.0800721	0.175	0.102	1	other
Mydgf	0.0960251	0.0800458	0.354	0.298	1	other
Hdac3	0.106782	0.0798176	0.44	0.379	1	other
Fam220a	0.0386563	0.079812	0.533	0.455	1	other
Cnep1r1	0.0727527	0.0798018	0.327	0.255	1	other
Man2b1	0.0378842	0.0797161	0.261	0.191	1	other
Uri1	0.142345	0.0797135	0.529	0.498	1	other
Acbd5	0.207124	0.079683	0.405	0.383	1	other
Ccng2	0.043237	0.0796701	0.21	0.149	1	other
Cdkn2aip	0.0403388	0.0795403	0.218	0.149	1	other
Rnf5	0.185488	0.0794723	0.467	0.434	1	other
Smim7	0.318778	0.0794031	0.444	0.447	1	other
Atad2b	0.0899107	0.0793524	0.222	0.166	1	other
Lats1	0.0360478	0.0792698	0.241	0.17	1	other
Atp11b	0.384458	0.0792462	0.346	0.315	1	other
Hnrnpll	0.120331	0.0792415	0.307	0.268	1	other
Rhobtb2	0.57512	0.079208	0.335	0.34	1	other
Reps2	0.216469	0.0791955	0.564	0.553	1	other
Aftph	0.0627921	0.079105	0.498	0.426	1	other
Cdk17	0.123917	0.0790851	0.354	0.311	1	other
H2afz	0.0718316	0.0790744	0.864	0.838	1	other
1700003E16Rik	0.0169566	0.0789315	0.175	0.098	1	other
Pikfyve	0.0648008	0.0788802	0.292	0.221	1	other
Abcd4	0.077719	0.0788057	0.214	0.157	1	other
Tra2b	0.151288	0.0787916	0.798	0.783	1	other
Nol4	0.0763189	0.0787585	0.56	0.485	1	other
Jtb	0.175315	0.0787472	0.521	0.468	1	other
Dhx40	0.158267	0.078732	0.261	0.213	1	other
Dnajb1	0.114723	0.0786149	0.397	0.34	1	other
Tmeff2	0.0344614	0.0785986	0.467	0.383	1	other
Nme7	0.026101	0.0785733	0.16	0.094	1	other
2610044O15Rik8	0.0423503	0.0784429	0.226	0.157	1	other
Rnf138rt1	0.0129307	0.0784344	0.125	0.06	1	other
4930430F08Rik	0.0339327	0.0784077	0.253	0.179	1	other
Tmem65	0.16439	0.0783631	0.381	0.336	1	other
Oard1	0.0591555	0.0782861	0.156	0.102	1	other
Gosr2	0.220043	0.0782721	0.479	0.443	1	other
Stag2	0.0837803	0.0782711	0.354	0.294	1	other
Rp9	0.181698	0.0782531	0.821	0.838	1	other
Ints6	0.0519846	0.078212	0.444	0.37	1	other
1700037H04Rik	0.161296	0.0782024	0.576	0.545	1	other
Idh3g	0.122811	0.0779837	0.362	0.302	1	other
Itih3	0.0292587	0.0779068	0.089	0.043	1	other
Ahsa2	0.0466912	0.0778923	0.346	0.264	1	other
Cfap20	0.0470864	0.077886	0.401	0.315	1	other
Skil	0.198805	0.0778698	0.405	0.379	1	other
Limd2	0.126424	0.0778513	0.393	0.332	1	other
Chmp4b	0.050286	0.0778401	0.837	0.77	1	other
Mrpl38	0.0302874	0.0776942	0.463	0.357	1	other
Dpy19l4	0.107452	0.0776507	0.412	0.349	1	other
Hnrnph3	0.125478	0.0776337	0.494	0.451	1	other
Zzz3	0.137641	0.077618	0.342	0.302	1	other
Sesn3	0.0883511	0.0775613	0.794	0.749	1	other
Cox17	0.046547	0.077548	0.953	0.936	1	other
Polr2j	0.10582	0.0775298	0.541	0.489	1	other
Magohb	0.0296337	0.0774305	0.16	0.094	1	other
Clpb	0.0901446	0.0773879	0.218	0.166	1	other
Ltbp4	0.0268358	0.0773603	0.233	0.153	1	other
Ptms	0.0519532	0.0772264	0.895	0.855	1	other
Pkn2	0.133756	0.0772216	0.518	0.472	1	other
2610507B11Rik	0.191166	0.0771439	0.49	0.451	1	other
Zfp934	0.0265697	0.0771254	0.136	0.077	1	other
D10Wsu102e	0.216905	0.0771144	0.401	0.353	1	other
Pip5k1a	0.228771	0.0771131	0.498	0.455	1	other
Selenos	0.206214	0.0771074	0.315	0.277	1	other
Baz2b	0.0795657	0.0771057	0.335	0.264	1	other
Thumpd1	0.101326	0.0770973	0.436	0.383	1	other
Srsf11	0.0911668	0.0770484	0.833	0.796	1	other
Wdcp	0.00813273	0.0769333	0.163	0.085	1	other
Cd63	0.145451	0.0767689	0.249	0.196	1	other
Rraga	0.495411	0.0766533	0.556	0.583	1	other
Swt1	0.162135	0.0766322	0.276	0.234	1	other
Tnxb	0.0175976	0.0766295	0.179	0.102	1	other
Rsrc2	0.0638082	0.0765586	0.696	0.651	1	other
Nfu1	0.0734118	0.0764402	0.409	0.362	1	other
Ttl	0.196789	0.0764384	0.245	0.204	1	other
Oprk1	0.102303	0.0764316	0.451	0.379	1	other
Ift172	0.0380343	0.0764282	0.156	0.094	1	other
Zfp383	0.145198	0.0763208	0.202	0.157	1	other
Cops8	0.179069	0.0762463	0.642	0.6	1	other
Trib2	0.505725	0.0762062	0.288	0.277	1	other
Ssna1	0.0331499	0.0761428	0.525	0.447	1	other
Clock	0.0819367	0.0761308	0.669	0.655	1	other
Zfp292	0.206709	0.0761295	0.553	0.515	1	other
Lhx5	0.185091	0.0760364	0.296	0.251	1	other
N4bp1	0.127417	0.0760282	0.541	0.494	1	other
Ppp1r12b	0.28097	0.0760239	0.362	0.345	1	other
Rae1	0.0461107	0.0760118	0.245	0.174	1	other
Setd2	0.0715708	0.0759504	0.502	0.426	1	other
Gfpt1	0.0782627	0.0759438	0.638	0.528	1	other
Sgcb	0.105842	0.0758554	0.374	0.315	1	other
Mfsd14b	0.215353	0.0758481	0.35	0.311	1	other
Hirip3	0.0742037	0.075817	0.272	0.209	1	other
Ift52	0.0977524	0.0758119	0.16	0.111	1	other
Gm26853	0.218036	0.0757409	0.241	0.209	1	other
Cycs	0.0626893	0.0757281	0.747	0.728	1	other
Riok2	0.0218916	0.0755902	0.187	0.111	1	other
Hltf	0.0730406	0.0755564	0.198	0.14	1	other
Rmi1	0.179238	0.0755141	0.288	0.247	1	other
Vamp3	0.275547	0.0754564	0.253	0.217	1	other
9530068E07Rik	0.0363335	0.0754477	0.607	0.549	1	other
Nudt3	0.166194	0.0754095	0.805	0.826	1	other
Mrps6	0.139671	0.0753604	0.241	0.2	1	other
Crtc2	0.00579671	0.0753569	0.128	0.055	1	other
H2-Ke6	0.219987	0.0753276	0.241	0.209	1	other
Top1	0.139362	0.0753232	0.825	0.813	1	other
St8sia2	0.00441997	0.0753171	0.183	0.094	1	other
Zfp608	0.0300014	0.075304	0.14	0.081	1	other
Gm26722	0.00353977	0.0752735	0.086	0.026	1	other
Blvra	0.0332592	0.0752246	0.206	0.136	1	other
Mfn1	0.202168	0.0751838	0.335	0.289	1	other
Gm3636	0.0233349	0.0751706	0.14	0.077	1	other
Rbfox2	0.0607483	0.075167	0.844	0.762	1	other
Twf1	0.0925886	0.0751395	0.381	0.306	1	other
Ssb	0.433157	0.0751175	0.619	0.681	1	other
Cacna1d	0.0792538	0.0750827	0.237	0.179	1	other
Abhd6	0.803516	0.0750438	0.28	0.289	1	other
Smox	0.0168444	0.0750132	0.125	0.064	1	other
Osbpl5	0.0097955	0.0750123	0.109	0.047	1	other
Cavin2	0.0599055	0.074988	0.148	0.094	1	other
Immp1l	0.164781	0.0749481	0.35	0.306	1	other
Trim28	0.135395	0.0749367	0.389	0.323	1	other
Tef	0.204561	0.0748896	0.665	0.609	1	other
Samd5	0.250709	0.0748095	0.451	0.417	1	other
Mical2	0.118117	0.0747759	0.315	0.255	1	other
Herc4	0.0331182	0.074736	0.175	0.111	1	other
Myg1	0.0213343	0.0746773	0.253	0.17	1	other
Zfp938	0.0420696	0.0746733	0.307	0.23	1	other
Akirin1	0.0815314	0.0746468	0.533	0.485	1	other
Fem1c	0.0893411	0.0746446	0.444	0.404	1	other
Chchd1	0.185639	0.0745882	0.545	0.523	1	other
Gm48715	0.0413516	0.0745832	0.093	0.047	1	other
Ddhd1	0.101661	0.0745805	0.545	0.46	1	other
Pacsin2	0.171145	0.0745506	0.218	0.179	1	other
Klf10	0.00351883	0.0744982	0.093	0.03	1	other
Nbr1	0.18402	0.0744693	0.339	0.294	1	other
Ptpn12	0.0465843	0.0743737	0.292	0.213	1	other
P4ha2	0.0555289	0.0742675	0.144	0.089	1	other
Magi2	0.322383	0.0742117	0.416	0.387	1	other
Igsf9	0.046981	0.0741842	0.198	0.132	1	other
Med23	0.084321	0.0741817	0.171	0.119	1	other
Thap3	0.188853	0.0741542	0.405	0.387	1	other
Cox6a1	0.107362	0.0741514	0.817	0.843	1	other
Ralgapa1	0.392243	0.074101	0.545	0.545	1	other
Imp3	0.211959	0.0740319	0.409	0.379	1	other
Mrpl1	0.0176984	0.0739739	0.187	0.111	1	other
Arrdc3	0.0171298	0.0738762	0.132	0.068	1	other
Phc3	0.402908	0.0738694	0.432	0.426	1	other
Abcd1	0.00592621	0.073832	0.109	0.043	1	other
Ift27	0.0171234	0.0737994	0.148	0.081	1	other
Ate1	0.28251	0.0737942	0.712	0.702	1	other
Hsp90b1	0.256316	0.0737212	0.864	0.817	1	other
mt-Atp8	0.101971	0.0737069	0.611	0.574	1	other
Ahr	0.0321205	0.073701	0.101	0.051	1	other
Wnk1	0.215946	0.0736473	0.673	0.655	1	other
Sulf1	0.233628	0.0736303	0.237	0.196	1	other
Tfpt	0.158443	0.0736291	0.206	0.166	1	other
Ccdc12	0.0601708	0.0736264	0.529	0.464	1	other
D430042O09Rik	0.24099	0.0735517	0.331	0.298	1	other
Ifnar1	0.152937	0.0734972	0.233	0.191	1	other
Chd9	0.0621569	0.0734893	0.529	0.443	1	other
Tro	0.0619867	0.0734616	0.848	0.843	1	other
Naa20	0.22503	0.0733876	0.374	0.34	1	other
Tsen15	0.22041	0.0733653	0.23	0.196	1	other
Krt77	0.0228161	0.0733561	0.132	0.072	1	other
Smarca5	0.315546	0.0732717	0.716	0.698	1	other
Mplkip	0.0520971	0.0732655	0.222	0.153	1	other
Kbtbd7	0.162666	0.0731864	0.405	0.349	1	other
Zfp511	0.158016	0.0731717	0.163	0.123	1	other
Hebp2	0.0570437	0.0731542	0.187	0.123	1	other
Tubgcp3	0.0763559	0.0731511	0.296	0.243	1	other
Churc1	0.167113	0.0731259	0.549	0.511	1	other
Phip	0.276003	0.0731156	0.646	0.634	1	other
Slc39a10	0.191615	0.0730892	0.537	0.494	1	other
Rab11fip2	0.206553	0.0730533	0.786	0.804	1	other
Mrps35	0.0836034	0.0730397	0.191	0.136	1	other
Aebp2	0.12696	0.0729777	0.385	0.345	1	other
Gm17259	0.00270525	0.0729627	0.113	0.038	1	other
Tmem2	0.00797607	0.072913	0.144	0.068	1	other
Nkd2	0.00457415	0.0729032	0.07	0.017	1	other
4930453N24Rik	0.0417364	0.0728449	0.202	0.136	1	other
Tdrp	0.0369276	0.0728034	0.257	0.174	1	other
C1d	0.0833863	0.0728	0.887	0.877	1	other
Dph7	0.0246881	0.0727132	0.195	0.119	1	other
Ttc9c	0.0563768	0.0726595	0.296	0.226	1	other
Phlda1	0.620107	0.0726479	0.268	0.255	1	other
AU019823	0.187693	0.0726445	0.237	0.2	1	other
Mrto4	0.0987572	0.072626	0.307	0.251	1	other
Gm39244	0.0811011	0.0725711	0.148	0.098	1	other
Med9	0.304203	0.0725628	0.241	0.213	1	other
Cd82	0.0185603	0.0725602	0.132	0.068	1	other
Maoa	0.291236	0.0725539	0.389	0.37	1	other
9030624J02Rik	0.176965	0.0725396	0.319	0.277	1	other
Arhgef3	0.0574724	0.0725349	0.163	0.106	1	other
Prpsap2	0.320223	0.0725261	0.296	0.272	1	other
Bhlhe41	0.176436	0.0725233	0.494	0.434	1	other
Prrc2c	0.273068	0.0724672	0.743	0.779	1	other
Csrnp3	0.53687	0.0724416	0.669	0.757	1	other
Arid3a	0.00943751	0.0724067	0.136	0.064	1	other
Nyap2	0.480161	0.072397	0.284	0.277	1	other
Fbxo28	0.130111	0.0723712	0.272	0.221	1	other
Pds5a	0.127675	0.0723626	0.389	0.345	1	other
Golga4	0.109679	0.0723536	0.603	0.557	1	other
Atf1	0.062666	0.0723297	0.21	0.149	1	other
Uso1	0.498444	0.0722966	0.471	0.46	1	other
Letm2	0.320633	0.0722379	0.471	0.451	1	other
Ndufaf2	0.135871	0.072222	0.339	0.281	1	other
Hmgn5	0.044532	0.0721308	0.097	0.051	1	other
Cactin	0.0660541	0.072074	0.16	0.106	1	other
Fip1l1	0.0724213	0.0720378	0.599	0.566	1	other
Ncoa2	0.250392	0.0720044	0.412	0.396	1	other
Rfx3	0.210093	0.0719895	0.342	0.298	1	other
Grik4	0.131839	0.0719388	0.222	0.174	1	other
Gm14703	0.0217295	0.0719335	0.101	0.047	1	other
Map2k5	0.0347152	0.0719272	0.198	0.132	1	other
Bend7	0.0628271	0.0719193	0.183	0.123	1	other
Ubr2	0.159698	0.0719047	0.455	0.387	1	other
Gapvd1	0.208628	0.0718344	0.58	0.566	1	other
Dock11	0.291326	0.0718077	0.14	0.115	1	other
Maf1	0.198987	0.0717385	0.261	0.226	1	other
Spag9	0.145988	0.0717315	0.86	0.847	1	other
Brwd1	0.414656	0.0716998	0.588	0.613	1	other
Anxa6	0.08873	0.0716638	0.339	0.268	1	other
Hnrnpm	0.214756	0.071658	0.44	0.4	1	other
D030056L22Rik	0.147731	0.0716373	0.28	0.234	1	other
Ppm1k	0.274647	0.0716351	0.486	0.477	1	other
Fkbp1a	0.058635	0.0716196	0.981	0.949	1	other
Clpx	0.0776491	0.0715965	0.198	0.14	1	other
Sh3glb1	0.172292	0.0715964	0.416	0.379	1	other
Samd4	0.225668	0.0715856	0.44	0.4	1	other
Btbd10	0.338261	0.0715801	0.3	0.285	1	other
Zfp428	0.309079	0.0715181	0.405	0.379	1	other
Foxo1	0.587495	0.0715027	0.167	0.157	1	other
Gm9856	0.0991889	0.0714953	0.525	0.46	1	other
Nop10	0.0231339	0.071462	0.821	0.8	1	other
Hmces	0.174328	0.0714545	0.14	0.106	1	other
Parn	0.115118	0.071452	0.233	0.183	1	other
St7l	0.358162	0.0714442	0.265	0.243	1	other
Rcn2	0.225866	0.0714211	0.743	0.728	1	other
Fam206a	0.151675	0.0714152	0.144	0.106	1	other
Pianp	0.0699593	0.0713683	0.911	0.911	1	other
Ice2	0.0363076	0.0713681	0.117	0.064	1	other
Med14	0.135922	0.071365	0.323	0.264	1	other
Cbfa2t3	0.00165095	0.0713606	0.07	0.013	1	other
Prpf4b	0.131193	0.0712815	0.716	0.668	1	other
Thrb	0.207533	0.0712438	0.148	0.111	1	other
Lpp	0.133455	0.0711869	0.315	0.26	1	other
Ern2	0.171637	0.071155	0.109	0.077	1	other
Bbs7	0.0399743	0.0711466	0.163	0.102	1	other
Phospho2	0.064723	0.0710859	0.233	0.17	1	other
Neto1	0.0949166	0.0710599	0.156	0.106	1	other
Zfp937	0.111112	0.0710486	0.183	0.136	1	other
Vezt	0.624338	0.0710176	0.533	0.54	1	other
Hspd1	0.106115	0.0710011	0.681	0.643	1	other
Dnajc12	0.0981425	0.0709822	0.304	0.243	1	other
Bptf	0.10667	0.0709532	0.86	0.851	1	other
Prkab2	0.0816205	0.0709476	0.268	0.2	1	other
Mapkbp1	0.0485793	0.0709076	0.253	0.187	1	other
Cidea	0.00095547	0.0708824	0.066	0.009	1	other
Yme1l1	0.0223158	0.0707726	0.677	0.591	1	other
D730003I15Rik	0.169001	0.0707461	0.171	0.132	1	other
Npbwr1	0.127062	0.0707137	0.101	0.064	1	other
Aph1b	0.17477	0.0706662	0.249	0.209	1	other
Tmem245	0.20436	0.0706272	0.623	0.566	1	other
Isyna1	0.075445	0.0705526	0.272	0.209	1	other
Necab1	0.601177	0.0705283	0.167	0.157	1	other
Zcchc6	0.126956	0.0705238	0.268	0.221	1	other
Med20	0.0178319	0.0704943	0.167	0.094	1	other
Cacybp	0.0731597	0.0704705	0.634	0.591	1	other
Sars2	0.0219203	0.0704625	0.125	0.064	1	other
Fam117b	0.188085	0.0704455	0.599	0.553	1	other
Hivep1	0.0902436	0.0704054	0.257	0.191	1	other
Celf5	0.0267635	0.0703689	0.856	0.851	1	other
Akip1	0.00107047	0.0703627	0.082	0.017	1	other
Swi5	0.14841	0.0703567	0.895	0.889	1	other
Btbd7	0.238581	0.0703247	0.272	0.243	1	other
Ppan	0.0500592	0.070297	0.179	0.119	1	other
N4bp2l2	0.308387	0.0701858	0.595	0.566	1	other
Dpm1	0.247521	0.0701659	0.381	0.34	1	other
Amigo2	0.18022	0.0701375	0.268	0.23	1	other
Smim20	0.297176	0.0701212	0.346	0.306	1	other
Cd151	0.145246	0.070093	0.191	0.149	1	other
Zfp827	0.218971	0.0700618	0.218	0.179	1	other
Tmem147	0.16044	0.0700554	0.467	0.426	1	other
Pmm2	0.236949	0.0700278	0.171	0.14	1	other
Safb2	0.333434	0.0700249	0.576	0.574	1	other
Med25	0.428346	0.070015	0.272	0.264	1	other
Akr1e1	0.051782	0.0699874	0.136	0.085	1	other
Gpr45	0.45447	0.0699283	0.257	0.247	1	other
Taz	0.17968	0.0699238	0.525	0.472	1	other
Wdfy3	0.198472	0.0697833	0.661	0.668	1	other
Fndc4	0.243243	0.0697614	0.358	0.328	1	other
Eif4e3	0.468748	0.0697162	0.292	0.285	1	other
Snap29	0.100325	0.0697118	0.128	0.085	1	other
Vps29	0.307326	0.0697072	0.56	0.553	1	other
Dxo	0.0950708	0.0696879	0.128	0.085	1	other
Dlx2	0.366763	0.069667	0.553	0.532	1	other
Zfp873	0.0387624	0.0696648	0.128	0.072	1	other
Ptpn4	0.239565	0.0696053	0.339	0.298	1	other
Mllt10	0.07687	0.0695778	0.502	0.447	1	other
Fut8	0.550987	0.069557	0.568	0.579	1	other
Ssu72	0.151303	0.0695443	0.304	0.251	1	other
Rrp1b	0.0705579	0.0695097	0.14	0.089	1	other
Bccip	0.145251	0.0694877	0.44	0.391	1	other
Mal2	0.200118	0.0694517	0.514	0.477	1	other
Calcr	0.0342873	0.0694495	0.218	0.136	1	other
Pex11a	0.0306806	0.069444	0.097	0.047	1	other
Xpo1	0.107007	0.0694392	0.436	0.357	1	other
Smg6	0.202829	0.0694316	0.319	0.281	1	other
Clasp1	0.245545	0.0694276	0.553	0.515	1	other
Sys1	0.158232	0.0694157	0.553	0.506	1	other
Cnih1	0.401901	0.0694104	0.564	0.583	1	other
Srek1	0.204716	0.0693989	0.615	0.596	1	other
BC005561	0.225596	0.0693734	0.599	0.57	1	other
Zfp760	0.0241905	0.0693698	0.128	0.068	1	other
Sept1	0.128277	0.0693475	0.195	0.145	1	other
Lrch2	0.337287	0.0693414	0.319	0.285	1	other
Kif3a	0.206239	0.0692959	0.759	0.736	1	other
4931406P16Rik	0.292044	0.0692791	0.319	0.298	1	other
Chrac1	0.254364	0.0692633	0.284	0.255	1	other
Ubap2l	0.320939	0.0692543	0.568	0.574	1	other
Trmt2a	0.265736	0.0692385	0.222	0.191	1	other
Mrgbp	0.135153	0.0691447	0.249	0.196	1	other
Socs6	0.0658361	0.06914	0.261	0.196	1	other
Trank1	0.177627	0.0691297	0.591	0.557	1	other
Ncaph2	0.123718	0.0690966	0.346	0.294	1	other
Bmpr1a	0.318984	0.0690815	0.261	0.234	1	other
Arhgap33	0.297797	0.0690712	0.261	0.238	1	other
Farsa	0.0974546	0.0690117	0.265	0.204	1	other
Rfng	0.110646	0.0689489	0.354	0.294	1	other
Xpo4	0.19178	0.0689474	0.253	0.213	1	other
Rwdd1	0.161928	0.0688922	0.49	0.447	1	other
Aprt	0.207654	0.0688659	0.436	0.404	1	other
Dcx	0.227114	0.0688403	0.354	0.311	1	other
Rdh10	0.00600108	0.0688222	0.109	0.043	1	other
Alkbh1	0.159692	0.0687711	0.482	0.438	1	other
Tmem145	0.122106	0.0687616	0.444	0.391	1	other
Zfp512	0.133931	0.0687298	0.623	0.591	1	other
Phldb1	0.398793	0.0687227	0.167	0.149	1	other
Abhd18	0.197278	0.0687174	0.479	0.447	1	other
Mrpl54	0.209427	0.0686988	0.51	0.477	1	other
Mettl26	0.425533	0.0686924	0.401	0.387	1	other
Lrp1b	0.128689	0.068645	0.953	0.94	1	other
Cog6	0.175519	0.0685965	0.237	0.196	1	other
Ensa	0.381361	0.0685923	0.732	0.753	1	other
Nolc1	0.178995	0.0685761	0.393	0.349	1	other
Arl8b	0.254907	0.0685226	0.817	0.809	1	other
Dkkl1	0.000416826	0.0684129	0.062	0.004	1	other
Pigp	0.188453	0.0684105	0.292	0.247	1	other
Stmn4	0.525229	0.0683494	0.545	0.549	1	other
Sema3c	0.0110553	0.0683465	0.07	0.021	1	other
Med4	0.108344	0.0683421	0.265	0.209	1	other
Selenok	0.138872	0.0683247	0.782	0.762	1	other
Cnot2	0.177132	0.0682255	0.37	0.328	1	other
Nxpe3	0.174731	0.0681647	0.218	0.179	1	other
Smarcb1	0.14107	0.0681244	0.23	0.183	1	other
Rbm22	0.052214	0.0681078	0.237	0.174	1	other
Tram1l1	0.168052	0.068094	0.556	0.519	1	other
Rsbn1l	0.207074	0.0680861	0.37	0.328	1	other
Ssbp4	0.321198	0.0680395	0.732	0.715	1	other
Tmem229a	0.00428501	0.0679884	0.148	0.068	1	other
Cbwd1	0.0237086	0.0679185	0.093	0.043	1	other
Nck1	0.0694992	0.0679151	0.265	0.204	1	other
Rilpl2	0.0559643	0.0678521	0.144	0.089	1	other
Amn1	0.318442	0.0678254	0.471	0.447	1	other
Atp6v1g1	0.1251	0.0677951	0.84	0.83	1	other
Cryab	0.00112872	0.0677747	0.082	0.017	1	other
Pcgf6	0.192534	0.0677438	0.195	0.157	1	other
Maob	0.0291548	0.067722	0.187	0.115	1	other
Tcaim	0.305372	0.0676908	0.226	0.196	1	other
Slc22a17	0.142907	0.0676861	0.957	0.923	1	other
Lmbr1	0.238507	0.0676628	0.354	0.319	1	other
Grk3	0.32642	0.0676585	0.335	0.311	1	other
Gskip	0.209303	0.0676246	0.463	0.409	1	other
Exosc2	0.538599	0.0675769	0.257	0.243	1	other
Csnk2a2	0.185329	0.0675313	0.518	0.489	1	other
Jrkl	0.105652	0.0674199	0.183	0.136	1	other
Gm49359	0.109255	0.067381	0.136	0.094	1	other
Gabarapl2	0.242259	0.0673622	0.848	0.826	1	other
Anp32b	0.18236	0.0673181	0.537	0.489	1	other
Slc25a27	0.091406	0.0673114	0.226	0.17	1	other
Cox14	0.246177	0.0673091	0.685	0.689	1	other
Wdr61	0.120982	0.0672579	0.249	0.196	1	other
Tusc3	0.166723	0.0672054	0.634	0.613	1	other
Tmco1	0.163352	0.067148	0.37	0.323	1	other
Ascc3	0.18946	0.0670693	0.257	0.209	1	other
Lig4	0.128073	0.0669088	0.187	0.14	1	other
Rasa3	0.253977	0.0668861	0.121	0.094	1	other
Irf2bpl	0.285426	0.0667954	0.471	0.434	1	other
Birc2	0.183401	0.0667757	0.28	0.238	1	other
Flvcr1	0.187936	0.0667656	0.202	0.157	1	other
Naxd	0.599072	0.066737	0.276	0.272	1	other
Gnpda2	0.120076	0.0667294	0.249	0.2	1	other
Ppp2r5a	0.12265	0.066707	0.14	0.098	1	other
Cog1	0.0571933	0.0666636	0.163	0.106	1	other
Nudt16l1	0.235667	0.0666266	0.327	0.289	1	other
Ctsz	0.0567545	0.0666136	0.16	0.102	1	other
Kdelr1	0.305429	0.066588	0.436	0.426	1	other
Esd	0.337744	0.0665794	0.568	0.583	1	other
Tpra1	0.361932	0.0665083	0.187	0.162	1	other
C1qtnf12	0.0684615	0.0664897	0.148	0.098	1	other
Med6	0.0524874	0.0664755	0.089	0.047	1	other
Mamld1	0.129638	0.0664375	0.265	0.209	1	other
Scrt1	0.0988396	0.066407	0.175	0.128	1	other
Dock9	0.267021	0.0663737	0.389	0.349	1	other
Commd6	0.238639	0.0663695	0.35	0.328	1	other
Srsf1	0.143475	0.066306	0.844	0.83	1	other
Gm26670	0.00789678	0.0663057	0.086	0.03	1	other
Gon4l	0.252099	0.0663007	0.576	0.545	1	other
Irf3	0.0670683	0.0662669	0.136	0.085	1	other
Josd2	0.177118	0.0662534	0.354	0.306	1	other
Pde2a	0.0380629	0.0662084	0.093	0.047	1	other
Anp32a	0.518794	0.0661826	0.693	0.723	1	other
Gfod1	0.22811	0.0661601	0.272	0.234	1	other
Zfp90	0.0336555	0.0661358	0.171	0.102	1	other
Arl4a	0.147846	0.0660954	0.432	0.366	1	other
Nup88	0.127369	0.0660822	0.284	0.226	1	other
Exosc1	0.101478	0.0660584	0.253	0.196	1	other
1110008P14Rik	0.242701	0.0660563	0.755	0.766	1	other
Utp18	0.032126	0.0660322	0.179	0.111	1	other
Hdac2	0.142276	0.0660153	0.51	0.46	1	other
Pnmal1	0.150479	0.0659811	0.895	0.847	1	other
2810474O19Rik	0.104625	0.065862	0.362	0.306	1	other
Gripap1	0.0378166	0.0658388	0.533	0.443	1	other
Ahcyl1	0.320442	0.0658364	0.588	0.574	1	other
Far1	0.228251	0.0658178	0.549	0.523	1	other
Rab14	0.108635	0.0658012	0.899	0.906	1	other
Sertad2	0.225639	0.0657951	0.222	0.187	1	other
Rdx	0.131751	0.0657893	0.506	0.434	1	other
Zfp202	0.0177646	0.0656834	0.097	0.043	1	other
Cst6	0.107988	0.0655726	0.128	0.085	1	other
Mterf3	0.0466254	0.0654809	0.128	0.077	1	other
Tmem14c	0.0369954	0.0654595	0.253	0.17	1	other
Hist1h1c	0.00231772	0.0654398	0.097	0.03	1	other
Klhl21	0.143964	0.0654172	0.117	0.081	1	other
Znhit1	0.166313	0.0654032	0.626	0.549	1	other
Dbn1	0.2321	0.0653885	0.595	0.583	1	other
Smchd1	0.272322	0.0653759	0.319	0.285	1	other
Abraxas2	0.363036	0.0651626	0.42	0.379	1	other
Gm5617	0.102345	0.0651533	0.206	0.153	1	other
H2afx	0.231424	0.0651276	0.276	0.238	1	other
Ppp4r3b	0.314878	0.0651002	0.319	0.294	1	other
Adck5	0.139063	0.065091	0.195	0.145	1	other
Plxnb2	0.238079	0.0650873	0.304	0.264	1	other
Kdelr2	0.238203	0.0650837	0.432	0.391	1	other
Ndufaf4	0.500192	0.065025	0.467	0.46	1	other
Klhl5	0.0317063	0.0649877	0.132	0.072	1	other
Zmat2	0.332018	0.0649599	0.798	0.783	1	other
Tial1	0.276958	0.0649169	0.685	0.681	1	other
Arntl	0.228478	0.0648995	0.14	0.106	1	other
Psmb2	0.143515	0.0648679	0.257	0.209	1	other
Ccdc93	0.149162	0.0647642	0.167	0.128	1	other
Ralgds	0.27611	0.0647427	0.389	0.366	1	other
Ctnnd1	0.0179682	0.0646952	0.109	0.051	1	other
Slc25a19	0.116793	0.0646876	0.268	0.217	1	other
Wasf1	0.213494	0.0646708	0.518	0.464	1	other
Tspan9	0.0258531	0.0646139	0.117	0.06	1	other
Pdia6	0.34084	0.0645735	0.49	0.494	1	other
Dbt	0.0359768	0.0645623	0.16	0.098	1	other
Tbk1	0.156169	0.0645173	0.307	0.247	1	other
1810022K09Rik	0.146667	0.0645141	0.514	0.468	1	other
Pkib	0.03972	0.0644771	0.117	0.064	1	other
Tcof1	0.124711	0.0644428	0.175	0.128	1	other
C1ql2	0.0367355	0.0643994	0.109	0.055	1	other
Gpc3	0.032364	0.0643648	0.171	0.106	1	other
Trp53bp1	0.323875	0.0643476	0.689	0.677	1	other
Stk11	0.417035	0.0643374	0.35	0.323	1	other
Efs	0.020384	0.0642196	0.097	0.043	1	other
Rictor	0.0569315	0.06419	0.463	0.383	1	other
Stbd1	0.00935216	0.0641359	0.086	0.03	1	other
Ccni	0.110091	0.064108	0.65	0.596	1	other
A330102I10Rik	0.21676	0.0640944	0.167	0.132	1	other
Zfp422	0.187128	0.0640898	0.3	0.26	1	other
Srp14	0.379422	0.0640774	0.821	0.804	1	other
Smim10l1	0.198675	0.0640741	0.953	0.94	1	other
Nabp1	0.0838861	0.0639162	0.132	0.085	1	other
Ankle2	0.134599	0.0638616	0.257	0.209	1	other
Myo9a	0.19543	0.0638284	0.553	0.502	1	other
Nkain2	0.164112	0.0638104	0.167	0.132	1	other
Zik1	0.168567	0.063781	0.21	0.166	1	other
Eml1	0.0939603	0.0637261	0.175	0.128	1	other
Prdx3	0.369593	0.0636864	0.412	0.391	1	other
Cant1	0.205007	0.0636745	0.319	0.277	1	other
Fam208b	0.12115	0.0636692	0.206	0.157	1	other
Wdr3	0.146311	0.0636681	0.144	0.102	1	other
Tmem159	0.0300663	0.0635893	0.148	0.085	1	other
Matk	0.167698	0.0635505	0.681	0.668	1	other
Yipf5	0.280075	0.0635398	0.482	0.468	1	other
Nim1k	0.391749	0.0635366	0.222	0.2	1	other
Ubn2	0.418538	0.0635265	0.739	0.74	1	other
Spag6l	0.151369	0.0635126	0.14	0.102	1	other
Lsm14a	0.269938	0.0635048	0.393	0.357	1	other
Nxph1	0.107113	0.063486	0.097	0.06	1	other
Zfp1	0.0848409	0.063459	0.148	0.098	1	other
Slc30a7	0.0479876	0.0634179	0.16	0.102	1	other
Dixdc1	0.179544	0.0633914	0.482	0.443	1	other
Strn	0.131412	0.063366	0.257	0.196	1	other
Med27	0.0777907	0.0632969	0.144	0.098	1	other
Nrbf2	0.350203	0.0632911	0.206	0.183	1	other
Taf4	0.134622	0.0632856	0.156	0.115	1	other
Kif3b	0.168567	0.0632754	0.327	0.272	1	other
AI987944	0.0691681	0.0632318	0.163	0.111	1	other
Hsp90ab1	0.199486	0.0631915	1	1	1	other
Prrg3	0.0789921	0.0631617	0.409	0.328	1	other
Scx	0.0124242	0.0631258	0.082	0.03	1	other
Ubr4	0.217336	0.0631185	0.479	0.455	1	other
Tmem199	0.114369	0.0631147	0.416	0.328	1	other
Pnp	0.00774525	0.0631035	0.113	0.047	1	other
Kdm3a	0.0752024	0.0630739	0.163	0.111	1	other
Tpm3-rs7	0.00606645	0.063069	0.082	0.026	1	other
Ift22	0.121894	0.0630309	0.424	0.366	1	other
Cartpt	0.650054	0.0629972	0.167	0.183	1	other
Zfp449	0.0480213	0.0629641	0.136	0.081	1	other
Rer1	0.281532	0.062938	0.556	0.523	1	other
Mpv17	0.281346	0.0628891	0.346	0.311	1	other
Scand1	0.384178	0.0628483	0.455	0.443	1	other
C2cd5	0.199161	0.0627932	0.564	0.528	1	other
Ash1l	0.142463	0.0627862	0.79	0.757	1	other
Snw1	0.321246	0.062749	0.447	0.421	1	other
C330018D20Rik	0.0317282	0.0626854	0.128	0.072	1	other
Akr1b3	0.126351	0.0626594	0.183	0.136	1	other
Cap2	0.61712	0.062634	0.467	0.506	1	other
Nmt2	0.187202	0.0626315	0.549	0.519	1	other
Rgs9	0.416921	0.0625838	0.226	0.204	1	other
Ier3ip1	0.16229	0.06258	0.739	0.677	1	other
Plcxd3	0.158826	0.0625682	0.537	0.451	1	other
Hdhd2	0.411946	0.062566	0.412	0.409	1	other
Psmd10	0.125032	0.0625635	0.296	0.238	1	other
Plpp3	0.0969665	0.062551	0.105	0.064	1	other
Cstf2t	0.252591	0.0625356	0.459	0.43	1	other
Eif2b2	0.168977	0.0624888	0.148	0.111	1	other
Hmgn2	0.229317	0.0624886	0.696	0.689	1	other
Jade3	0.0303287	0.0624316	0.121	0.064	1	other
Adk	0.241697	0.0623644	0.183	0.149	1	other
Commd9	0.214377	0.0623226	0.241	0.2	1	other
Omg	0.378276	0.0623144	0.354	0.34	1	other
Qrsl1	0.10771	0.0623027	0.117	0.077	1	other
Csmd3	0.173493	0.0622815	0.42	0.383	1	other
Usp3	0.0173985	0.06225	0.117	0.055	1	other
Tmem17	0.0350353	0.0622437	0.121	0.064	1	other
Tmem184c	0.335207	0.0622413	0.319	0.298	1	other
Polr1d	0.17169	0.0622368	0.825	0.821	1	other
Rpl13a-ps1	0.0787968	0.0621734	0.117	0.072	1	other
Saysd1	0.0326961	0.0621647	0.136	0.077	1	other
4632404H12Rik	0.136862	0.0621576	0.113	0.077	1	other
Adprhl2	0.0497452	0.0621566	0.195	0.132	1	other
Ints11	0.144271	0.0621515	0.128	0.089	1	other
9930104L06Rik	0.0753334	0.0621434	0.156	0.102	1	other
Lig1	0.121603	0.0621413	0.144	0.098	1	other
Sms	0.405067	0.0621065	0.875	0.86	1	other
Atp2c1	0.223974	0.0620822	0.494	0.455	1	other
Abi2	0.302834	0.0620592	0.813	0.796	1	other
Cdh24	0.288842	0.0620445	0.125	0.098	1	other
Polr2c	0.208686	0.0619829	0.362	0.332	1	other
Eef1e1	0.196619	0.0619808	0.494	0.443	1	other
Asah1	0.330831	0.061973	0.28	0.264	1	other
Gm14305	0.209974	0.0619612	0.237	0.191	1	other
Chadl	0.430455	0.0619131	0.222	0.2	1	other
Ero1lb	0.38582	0.0618852	0.14	0.119	1	other
Ndufa11	0.312391	0.0618668	0.564	0.549	1	other
A230057D06Rik	0.269146	0.0618596	0.607	0.557	1	other
Gpc4	0.0242517	0.061844	0.062	0.021	1	other
Kctd18	0.0946071	0.0618242	0.183	0.132	1	other
Hnrnpu	0.306768	0.0617843	0.875	0.885	1	other
Nup62	0.195104	0.0617842	0.171	0.136	1	other
Slc7a8	0.0717545	0.0616775	0.253	0.179	1	other
Trp53bp2	0.0368775	0.0616609	0.117	0.064	1	other
Ube2r2	0.190542	0.0616161	0.778	0.706	1	other
Arhgef11	0.0377799	0.0616073	0.14	0.081	1	other
Txlng	0.327341	0.0615847	0.292	0.26	1	other
Nufip1	0.120668	0.0615798	0.125	0.085	1	other
Pld5	0.267074	0.0615744	0.128	0.098	1	other
Slain2	0.45631	0.0615659	0.198	0.183	1	other
Klhdc1	0.0795399	0.0615546	0.226	0.166	1	other
Hcn3	0.429459	0.0615486	0.315	0.289	1	other
Nip7	0.177234	0.0615429	0.257	0.213	1	other
Prpf39	0.392251	0.0614894	0.342	0.323	1	other
Ttc5	0.131757	0.0614311	0.237	0.187	1	other
Morc3	0.213174	0.0613962	0.195	0.157	1	other
Zfp316	0.141405	0.0613556	0.16	0.119	1	other
Ube2k	0.230093	0.0613163	0.689	0.655	1	other
Rps19bp1	0.399311	0.0613053	0.272	0.251	1	other
Tmco3	0.339787	0.0612793	0.339	0.315	1	other
Ccdc66	0.185241	0.0612613	0.245	0.2	1	other
Hpf1	0.0840933	0.0611869	0.704	0.634	1	other
Atp6v1h	0.22938	0.0611752	0.553	0.532	1	other
Galntl6	0.229142	0.0611026	0.257	0.213	1	other
Cep57l1	0.0493424	0.0610875	0.109	0.06	1	other
Inpp5a	0.236107	0.061054	0.23	0.2	1	other
Ext1	0.128481	0.060957	0.21	0.157	1	other
Luc7l3	0.138592	0.060946	0.86	0.868	1	other
Dip2b	0.416402	0.0609337	0.346	0.336	1	other
Clvs2	0.179386	0.0609298	0.311	0.268	1	other
Nfya	0.0353913	0.0609174	0.089	0.043	1	other
Xrn2	0.303593	0.0608578	0.241	0.213	1	other
Traip	0.022743	0.0608424	0.156	0.089	1	other
Bola1	0.141327	0.0607963	0.206	0.157	1	other
Abt1	0.0507315	0.0607803	0.16	0.102	1	other
Srf	0.0598158	0.0607693	0.218	0.153	1	other
Eif1b	0.21573	0.0607371	0.977	0.962	1	other
Smim1	0.32103	0.0607038	0.304	0.272	1	other
Ghdc	0.1104	0.0606872	0.097	0.06	1	other
Klf5	0.0433231	0.0606692	0.082	0.038	1	other
Trpc4ap	0.368765	0.0606599	0.537	0.528	1	other
Zcchc14	0.197753	0.0606504	0.397	0.357	1	other
Prpf31	0.413981	0.0605898	0.331	0.319	1	other
Anxa5	0.0283648	0.0605897	0.187	0.111	1	other
Crlf3	0.0273747	0.0605515	0.175	0.102	1	other
Ercc6l2	0.124177	0.0605258	0.167	0.119	1	other
Trafd1	0.205335	0.0604767	0.245	0.209	1	other
Dcp1b	0.0982849	0.0604753	0.136	0.089	1	other
Mfsd14a	0.496819	0.06046	0.323	0.298	1	other
Epc2	0.312831	0.0604405	0.405	0.37	1	other
Mettl13	0.0734684	0.0604399	0.171	0.115	1	other
Ddx10	0.222786	0.0604002	0.191	0.153	1	other
Zfc3h1	0.291686	0.0603823	0.257	0.23	1	other
Zfp575	0.160888	0.0603814	0.171	0.128	1	other
Tcea1	0.553068	0.0603654	0.51	0.506	1	other
Cnksr2	0.125167	0.0603537	0.261	0.204	1	other
Cdyl	0.148791	0.0603244	0.144	0.102	1	other
Tsc22d2	0.127307	0.0602494	0.304	0.247	1	other
Lekr1	0.220599	0.0602282	0.191	0.153	1	other
Zfp961	0.118328	0.0601439	0.121	0.081	1	other
Cdkl4	0.336533	0.0601377	0.101	0.081	1	other
Krcc1	0.159568	0.0601276	0.175	0.136	1	other
Cuta	0.201426	0.0601135	0.381	0.345	1	other
Rnf166	0.0982686	0.060099	0.268	0.204	1	other
Cry1	0.0855911	0.0600975	0.128	0.081	1	other
Fam117a	0.00624212	0.0600712	0.051	0.009	1	other
Dido1	0.335907	0.0600653	0.401	0.366	1	other
Ahctf1	0.307884	0.060055	0.342	0.311	1	other
Gab2	0.0681991	0.0600518	0.179	0.119	1	other
Dimt1	0.0304631	0.0600489	0.16	0.094	1	other
Senp5	0.156989	0.0600072	0.467	0.409	1	other
Svip	0.0783791	0.0599783	0.475	0.4	1	other
Mgarp	0.176751	0.0599753	0.008	0	1	other
Gfra4	0.337726	0.0599648	0.416	0.396	1	other
Ino80d	0.0497807	0.059952	0.424	0.353	1	other
Zfp414	0.250297	0.0598473	0.276	0.234	1	other
Psmd9	0.292881	0.05983	0.432	0.379	1	other
Arid2	0.140288	0.059792	0.405	0.34	1	other
Ino80	0.220107	0.0597677	0.187	0.149	1	other
Fam53b	0.0166325	0.0597381	0.14	0.072	1	other
Nup153	0.142651	0.0597063	0.218	0.17	1	other
Gm27199	0.378879	0.0596902	0.35	0.319	1	other
Hjurp	0.40139	0.0596763	0.366	0.362	1	other
Zfp950	0.0385651	0.0596349	0.591	0.489	1	other
Cnnm3	0.181879	0.0596211	0.249	0.2	1	other
Vac14	0.0760179	0.0595928	0.148	0.098	1	other
Lpcat1	0.13153	0.0595742	0.393	0.332	1	other
Rybp	0.276978	0.0595638	0.572	0.528	1	other
Mib2	0.128039	0.0595592	0.307	0.251	1	other
Usp9x	0.173996	0.0595565	0.895	0.915	1	other
Cisd2	0.25921	0.0595454	0.615	0.57	1	other
Cacna1b	0.60562	0.0595287	0.716	0.728	1	other
Armcx5	0.126956	0.0595146	0.272	0.217	1	other
Gtf2e2	0.121845	0.0594804	0.156	0.111	1	other
Hnrnph1	0.194156	0.0594702	0.887	0.834	1	other
Rab39b	0.367233	0.0594651	0.354	0.319	1	other
Scmh1	0.144291	0.0594629	0.49	0.421	1	other
Ctu1	0.126833	0.0594431	0.156	0.111	1	other
Sf3a1	0.313198	0.0593866	0.397	0.383	1	other
Timm29	0.595751	0.0593722	0.44	0.464	1	other
Banf1	0.63402	0.0593673	0.381	0.391	1	other
Pnp2	0.00308409	0.0593651	0.074	0.017	1	other
Snx18	0.0409836	0.0593474	0.128	0.072	1	other
Slc30a10	0.158951	0.0593281	0.198	0.153	1	other
Pogz	0.237928	0.0592877	0.389	0.362	1	other
Rdh13	0.315571	0.0592855	0.237	0.209	1	other
Krtcap3	0.0339712	0.0592581	0.097	0.047	1	other
Snrnp48	0.223729	0.059233	0.626	0.617	1	other
Mier1	0.310262	0.0592264	0.405	0.374	1	other
B3glct	0.060864	0.0592107	0.128	0.077	1	other
Trim37	0.219624	0.0590769	0.708	0.681	1	other
Pcdh9	0.197725	0.0590576	0.576	0.519	1	other
Tcea2	0.361928	0.0590559	0.327	0.311	1	other
Tpbg	0.0228052	0.0590008	0.062	0.021	1	other
Ctdnep1	0.138308	0.0589544	0.358	0.294	1	other
Atg5	0.379598	0.0589399	0.245	0.221	1	other
Pald1	0.0370808	0.0588891	0.082	0.038	1	other
Zc3h15	0.16034	0.0588846	0.755	0.706	1	other
Trmt13	0.231789	0.0588688	0.241	0.2	1	other
Sec11a	0.388294	0.0588676	0.311	0.289	1	other
Unc5d	0.693565	0.0588305	0.813	0.838	1	other
Tpr	0.188703	0.0588093	0.665	0.587	1	other
Rab37	0.0411651	0.0587745	0.07	0.03	1	other
Ago3	0.430768	0.0586958	0.428	0.43	1	other
Cul4a	0.188905	0.0586775	0.405	0.366	1	other
Rabgap1	0.326211	0.0586677	0.595	0.57	1	other
Eif2ak3	0.0417318	0.0586472	0.132	0.077	1	other
Rps8	0.00890825	0.0586329	1	1	1	other
Nop16	0.0717511	0.0586209	0.156	0.102	1	other
Ttc8	0.272156	0.0585788	0.412	0.374	1	other
Bloc1s2	0.0724889	0.0585354	0.424	0.336	1	other
Timm8b	0.543666	0.0585265	0.938	0.953	1	other
Hmgcl	0.304753	0.0585025	0.179	0.149	1	other
Ginm1	0.45484	0.0584887	0.187	0.17	1	other
Cep295	0.322059	0.0584663	0.284	0.251	1	other
Galnt7	0.302731	0.0583864	0.175	0.149	1	other
2310039H08Rik	0.174223	0.0583679	0.14	0.102	1	other
1700019D03Rik	0.118522	0.0583622	0.156	0.111	1	other
Pdik1l	0.0495552	0.0583318	0.3	0.23	1	other
AU041133	0.265378	0.058303	0.14	0.111	1	other
Dstn	0.250073	0.0583021	0.817	0.791	1	other
Crip1	0.00439953	0.0582921	0.07	0.017	1	other
Coa6	0.231812	0.058278	0.362	0.315	1	other
Skp1a	0.280385	0.0582647	0.872	0.847	1	other
Mrpl19	0.2625	0.0582458	0.307	0.268	1	other
Rnf20	0.222579	0.0582349	0.331	0.289	1	other
Thap7	0.0841676	0.0582243	0.187	0.128	1	other
Gm20342	0.295135	0.0582123	0.253	0.221	1	other
Gm26724	0.497283	0.0581908	0.241	0.226	1	other
Cars2	0.0890167	0.0581887	0.214	0.157	1	other
Zfp72	0.113185	0.0581803	0.132	0.089	1	other
1700048O20Rik	0.182218	0.058139	0.128	0.094	1	other
Itgb1	0.10104	0.0581292	0.261	0.209	1	other
Gm42715	0.0162995	0.0581076	0.066	0.021	1	other
2410004B18Rik	0.208139	0.0580215	0.374	0.332	1	other
Cldn11	0.00868856	0.0579818	0.078	0.026	1	other
Lmln	0.108524	0.0579273	0.148	0.102	1	other
Fbf1	0.259567	0.0578294	0.261	0.221	1	other
Pea15a	0.101382	0.057829	0.934	0.923	1	other
Zkscan3	0.245596	0.0578259	0.323	0.285	1	other
Gm7467	0.289145	0.0577848	0.144	0.115	1	other
Scg5	0.477864	0.0576882	0.669	0.647	1	other
Vhl	0.166255	0.0576792	0.183	0.14	1	other
Lrp1	0.218626	0.0576515	0.712	0.668	1	other
Fyn	0.2155	0.0576097	0.502	0.498	1	other
Bend5	0.0626197	0.0575607	0.233	0.162	1	other
B130006D01Rik	0.111356	0.0575434	0.14	0.098	1	other
Atr	0.235483	0.0575353	0.249	0.217	1	other
Dnm1l	0.267165	0.0574252	0.825	0.834	1	other
Slc35b1	0.319996	0.0574132	0.3	0.264	1	other
Zbtb44	0.288576	0.0574004	0.237	0.204	1	other
Mcfd2	0.241332	0.0573958	0.584	0.57	1	other
Zfp160	0.159586	0.0573632	0.179	0.136	1	other
Fam81a	0.186413	0.0573595	0.323	0.277	1	other
Smg1	0.229661	0.0573488	0.444	0.4	1	other
Mobp	0.0408514	0.0573318	0.136	0.081	1	other
Ciao1	0.0761471	0.0573286	0.257	0.187	1	other
Hp1bp3	0.179941	0.0573064	0.891	0.872	1	other
Zfp524	0.0102588	0.0572957	0.07	0.021	1	other
Gdap1	0.465535	0.0572953	0.751	0.749	1	other
Carhsp1	0.0397492	0.0572588	0.14	0.081	1	other
Rbm18	0.0952884	0.0572152	0.436	0.366	1	other
C530008M17Rik	0.186995	0.0572083	0.553	0.506	1	other
Slc38a9	0.329973	0.0572064	0.447	0.404	1	other
Tcf20	0.560712	0.0571573	0.572	0.566	1	other
Ubr7	0.243738	0.0571195	0.21	0.174	1	other
Polr3f	0.34035	0.057088	0.276	0.251	1	other
Gclc	0.366968	0.0570831	0.444	0.421	1	other
Pa2g4	0.272132	0.057049	0.381	0.353	1	other
Alg6	0.0675714	0.0569594	0.187	0.128	1	other
Pdhb	0.147148	0.0569222	0.642	0.609	1	other
Sfpq	0.546743	0.0568644	0.654	0.655	1	other
Cnppd1	0.0656175	0.0568572	0.144	0.089	1	other
Airn	0.215405	0.0568462	0.082	0.055	1	other
Ctc1	0.155938	0.0568312	0.202	0.157	1	other
Arntl2	0.275089	0.056786	0.125	0.098	1	other
Ehd1	0.445867	0.0567625	0.171	0.153	1	other
Prpf38b	0.285547	0.0567476	0.479	0.455	1	other
Gm3667	0.114698	0.0567227	0.097	0.06	1	other
Urm1	0.316503	0.0566453	0.393	0.349	1	other
Cyb561	0.410825	0.0566207	0.506	0.519	1	other
Cdk20	0.0314488	0.0566174	0.097	0.047	1	other
Slc2a13	0.275535	0.0565925	0.381	0.349	1	other
Rpp21	0.213583	0.0565759	0.475	0.421	1	other
Tubgcp4	0.151638	0.0565571	0.195	0.145	1	other
Thnsl1	0.175885	0.0565383	0.23	0.183	1	other
Ide	0.242869	0.0565072	0.284	0.238	1	other
Ufsp2	0.18802	0.0565033	0.37	0.328	1	other
Hspa4	0.247801	0.0564732	0.693	0.702	1	other
Tepsin	0.0214985	0.0564245	0.089	0.038	1	other
Rasl11b	0.0211635	0.0563938	0.089	0.038	1	other
Caap1	0.214888	0.0563582	0.218	0.183	1	other
Pcnt	0.268496	0.0563404	0.121	0.094	1	other
Acss3	0.222118	0.0563304	0.051	0.03	1	other
Cdc7	0.123693	0.0563089	0.163	0.115	1	other
Ptprj	0.125218	0.0562986	0.292	0.238	1	other
Ly6h	0.135812	0.0562917	0.981	0.983	1	other
Bach1	0.0353157	0.0562643	0.113	0.06	1	other
Ccdc107	0.168824	0.05624	0.257	0.2	1	other
Aurkaip1	0.166114	0.0562335	0.545	0.481	1	other
Slc7a6os	0.381058	0.0561878	0.214	0.191	1	other
Commd4	0.469916	0.056181	0.342	0.332	1	other
Zfp771	0.20531	0.0561794	0.366	0.323	1	other
D8Ertd738e	0.261756	0.0561642	0.856	0.834	1	other
Cpsf7	0.139462	0.0560968	0.412	0.362	1	other
Snhg6	0.426975	0.0559518	0.588	0.574	1	other
Znhit2	0.268185	0.0558967	0.323	0.289	1	other
Slc29a4	0.482545	0.0558823	0.272	0.255	1	other
Tppp3	0.214983	0.0558568	0.471	0.455	1	other
Rarb	0.0648076	0.0558133	0.082	0.043	1	other
Klf16	0.0314638	0.0558108	0.171	0.102	1	other
Gatd1	0.0742081	0.0558106	0.276	0.209	1	other
Acp6	0.0188102	0.0558083	0.078	0.03	1	other
Mmachc	0.0694509	0.0558047	0.125	0.077	1	other
Fgfbp3	0.0708189	0.0557936	0.109	0.064	1	other
Fam161b	0.471793	0.0557928	0.226	0.209	1	other
Phpt1	0.360231	0.0557686	0.206	0.183	1	other
Ak2	0.282553	0.0557606	0.28	0.247	1	other
Ptprz1	0.340065	0.0557359	0.397	0.349	1	other
Arhgef15	0.145458	0.0557241	0.311	0.247	1	other
Furin	0.203469	0.0556995	0.144	0.111	1	other
Gm4673	0.145016	0.0556827	0.066	0.038	1	other
Fam71e1	0.342125	0.0556704	0.097	0.077	1	other
Adi1	0.177641	0.0556618	0.268	0.217	1	other
Efcab1	0.25081	0.0556375	0.272	0.234	1	other
Zswim9	0.174294	0.0556286	0.179	0.136	1	other
Glce	0.135726	0.0556053	0.358	0.285	1	other
Col11a1	0.194227	0.0555531	0.089	0.06	1	other
Vgll3	0.307144	0.0555253	0.047	0.03	1	other
Ppwd1	0.174634	0.0555088	0.237	0.187	1	other
Eps15l1	0.384307	0.0555081	0.23	0.204	1	other
Gas8	0.192911	0.0555011	0.156	0.119	1	other
Xbp1	0.122325	0.055494	0.56	0.523	1	other
Bod1l	0.135233	0.0554837	0.63	0.587	1	other
Cox18	0.142195	0.0554748	0.195	0.145	1	other
Lyst	0.14433	0.0554658	0.198	0.149	1	other
Glul	0.289713	0.0554403	0.362	0.315	1	other
Pik3c2a	0.469214	0.0554357	0.233	0.213	1	other
Brd4	0.152464	0.0554317	0.634	0.566	1	other
Atp5j2	0.430206	0.055363	0.953	0.949	1	other
Smyd3	0.674644	0.0553443	0.401	0.391	1	other
Acadvl	0.10888	0.0553262	0.202	0.145	1	other
Emc3	0.651985	0.0553181	0.381	0.383	1	other
Gin1	0.162142	0.0553031	0.226	0.179	1	other
Paip2b	0.287105	0.055302	0.502	0.477	1	other
Ado	0.163367	0.0552993	0.152	0.111	1	other
Eif2s1	0.0568908	0.0552742	0.195	0.132	1	other
B2m	0.0451242	0.0552674	0.097	0.051	1	other
Tiam1	0.219243	0.0552669	0.331	0.285	1	other
Smndc1	0.154672	0.0552608	0.331	0.281	1	other
Rrm2b	0.358806	0.0552466	0.354	0.332	1	other
Ppp3cb	0.266357	0.0552421	0.879	0.843	1	other
Rhot2	0.352179	0.0551988	0.342	0.319	1	other
mt-Nd5	0.161933	0.0551951	0.965	0.957	1	other
Gm5577	0.0756309	0.0551883	0.093	0.051	1	other
Kin	0.116117	0.0551864	0.233	0.179	1	other
Ctr9	0.270472	0.0551819	0.276	0.243	1	other
Trip11	0.207624	0.0551746	0.463	0.404	1	other
Thoc3	0.248386	0.055119	0.377	0.34	1	other
Gtf2h1	0.305316	0.0551125	0.3	0.268	1	other
Mdp1	0.218136	0.0551015	0.358	0.315	1	other
Hnrnpr	0.364369	0.0550821	0.84	0.826	1	other
Raf1	0.423932	0.0550585	0.335	0.323	1	other
Stum	0.573348	0.0550343	0.319	0.374	1	other
Tmem56	0.217442	0.0550124	0.214	0.174	1	other
Dr1	0.41719	0.055011	0.272	0.26	1	other
Ptges3	0.129224	0.0549978	0.903	0.889	1	other
Elf2	0.177161	0.0549786	0.179	0.136	1	other
Smarcal1	0.0655294	0.0549614	0.109	0.064	1	other
Mien1	0.164731	0.0549608	0.634	0.613	1	other
Upf3b	0.204765	0.0549451	0.482	0.451	1	other
Atrx	0.534831	0.0549334	0.681	0.672	1	other
Gfm2	0.290486	0.0549258	0.163	0.136	1	other
Map1s	0.219015	0.054923	0.253	0.213	1	other
Scaf8	0.295556	0.0549195	0.257	0.213	1	other
Dynlt1a	0.337287	0.0548861	0.315	0.289	1	other
Mrpl37	0.132759	0.0548843	0.136	0.094	1	other
Snrnp200	0.354774	0.0548648	0.245	0.213	1	other
Tmem132b	0.202637	0.0548603	0.424	0.37	1	other
Mgea5	0.207012	0.0548434	0.712	0.664	1	other
Eif5	0.300432	0.0548255	0.907	0.911	1	other
Ago1	0.221109	0.0547997	0.393	0.345	1	other
Spg11	0.0515066	0.0547912	0.078	0.038	1	other
Arih1	0.139478	0.0547748	0.424	0.379	1	other
Smim24	0.076885	0.0547656	0.109	0.064	1	other
Pcmtd2	0.808991	0.0547404	0.409	0.417	1	other
Plek	0.17155	0.0547113	0.125	0.089	1	other
Taf1a	0.0568501	0.0546688	0.089	0.047	1	other
Mrpl36	0.157909	0.0546445	0.214	0.166	1	other
Arl13b	0.117486	0.054635	0.117	0.077	1	other
Cops7a	0.250283	0.0545935	0.514	0.477	1	other
Mrm3	0.167788	0.0545816	0.152	0.115	1	other
Rnf139	0.154979	0.0544885	0.163	0.123	1	other
Clk2	0.181648	0.054482	0.128	0.094	1	other
Mpnd	0.374543	0.0544785	0.362	0.34	1	other
Gm13075	0.0772083	0.0544613	0.086	0.047	1	other
Hps1	0.407932	0.0544496	0.171	0.153	1	other
Wdr70	0.27346	0.0544185	0.268	0.234	1	other
Lin54	0.175491	0.0544162	0.086	0.055	1	other
Fahd1	0.19157	0.0544149	0.167	0.128	1	other
Baz1b	0.164837	0.0543874	0.576	0.519	1	other
Smim4	0.131002	0.0543517	0.089	0.055	1	other
Tmem186	0.143145	0.0543268	0.191	0.14	1	other
Uba6	0.0803897	0.0543169	0.354	0.285	1	other
Tdp2	0.261903	0.0542998	0.144	0.115	1	other
Lsm3	0.21734	0.0542796	0.339	0.298	1	other
Gm30025	0.302049	0.0542713	0.156	0.128	1	other
Pitpnm3	0.335556	0.0542681	0.381	0.332	1	other
Krt1	0.916924	0.0542043	0.56	0.574	1	other
Pla2g12a	0.571623	0.0541831	0.444	0.438	1	other
Bri3	0.533129	0.0541815	0.829	0.817	1	other
Nipbl	0.298688	0.0541496	0.374	0.34	1	other
Jak1	0.323949	0.0541242	0.599	0.579	1	other
Prdm16	0.216902	0.0541031	0.214	0.17	1	other
Dennd4c	0.24611	0.0540969	0.156	0.123	1	other
Zcchc17	0.288879	0.0540911	0.813	0.834	1	other
Cog5	0.198082	0.0540805	0.257	0.213	1	other
Gm47469	0.000811826	0.054075	0.047	0	1	other
Nob1	0.274884	0.0540655	0.276	0.238	1	other
Tmem243	0.183779	0.0540391	0.335	0.285	1	other
Npat	0.288478	0.0540384	0.14	0.111	1	other
Smurf2	0.147908	0.0540178	0.163	0.119	1	other
[truncated: 13,982 more rows]

## Sheet: OVXvsCast_Vgat_Esr1
	p_val	avg_logFC	pct.1	pct.2	p_val_adjust
Xist	8.7272e-111	2.46838	0.986	0	1.39871e-106
Ptprk	8.27998e-09	0.415475	0.431	0.231	0.000132562
Cdh13	5.75022e-06	0.376425	0.491	0.352	0.0918771
Pcsk2	2.78204e-05	0.366511	0.546	0.423	0.443791
Rgs4	1.3023e-08	0.359883	0.666	0.502	0.000208446
Spock1	1.26834e-08	0.345575	0.794	0.694	0.000203023
Ddx3x	6.73372e-10	0.337738	0.823	0.722	1.07814e-05
2010005H15Rik	1.12839e-06	0.333102	0.297	0.146	0.0180452
Pex5l	9.85003e-07	0.321806	0.389	0.228	0.0157541
Slc18a2	0.0244691	0.316291	0.286	0.224	368.114
Krt1	1.94809e-05	0.312414	0.657	0.552	0.310895
Rorb	7.1424e-05	0.309565	0.66	0.544	1.13771
Syt1	8.51075e-05	0.304188	0.774	0.69	1.35534
Eif2s3x	1.03384e-08	0.303513	0.566	0.391	0.000165508
Tmsb4x	1.35644e-17	0.290452	1	1	2.17301e-13
Dgkb	4.04664e-06	0.281947	0.623	0.459	0.0646734
Pcp4	2.1339e-05	0.280597	0.986	0.979	0.340485
Bcl11a	0.000647005	0.270761	0.5	0.388	10.2537
Thsd7a	0.000120432	0.266446	0.289	0.171	1.91679
Herc3	0.000113191	0.256667	0.66	0.623	1.80177
Rgs10	2.90024e-05	0.254271	0.846	0.819	0.46256
Nptx1	0.00283403	0.252446	0.374	0.285	44.5255
Ssbp2	0.000218066	0.249101	0.626	0.555	3.46616
Dpp10	8.94124e-06	0.247616	0.66	0.587	0.142818
Fam19a1	2.18575e-05	0.246949	0.151	0.05	0.348736
Uqcc2	2.53903e-05	0.245214	0.8	0.73	0.405076
Vip	0.124788	0.233629	0.057	0.032	1595.04
Tmsb10	1.33611e-13	0.230096	1	0.996	2.14004e-09
Chchd4	4.00053e-05	0.229562	0.82	0.772	0.637884
Tsix	3.10956e-10	0.227791	0.14	0.004	4.97903e-06
mt-Nd1	2.28632e-23	0.225131	1	1	3.6636e-19
Nrgn	0.789318	0.224843	0.354	0.416	2191.15
Timp3	0.00159208	0.223321	0.223	0.139	25.1262
1110004F10Rik	0.000133223	0.220293	0.757	0.705	2.11985
Kcnk9	0.000980769	0.217849	0.423	0.306	15.5118
Sphkap	0.0115137	0.212321	0.391	0.331	177.242
Galnt14	0.000582534	0.210421	0.257	0.157	9.23549
mt-Nd5	3.87036e-07	0.205382	0.929	0.886	0.00619258
Elob	0.000189924	0.205159	0.726	0.63	3.02017
mt-Nd4l	1.87777e-05	0.205015	0.737	0.676	0.299692
Necab1	0.101064	0.204766	0.234	0.196	1362.04
Rasgrp1	0.0128858	0.199384	0.297	0.221	197.655
1500009L16Rik	0.00204575	0.19931	0.577	0.488	32.2349
Sptssa	0.00033501	0.198518	0.549	0.438	5.32029
Nr2c2ap	0.00162384	0.196414	0.303	0.217	25.6209
mt-Atp6	5.46007e-22	0.195159	1	1	8.74866e-18
Tmem106b	0.00467971	0.195081	0.603	0.566	73.1344
Lypd1	0.0183871	0.19393	0.591	0.548	279.355
Opcml	0.000240672	0.191098	0.82	0.747	3.82428
Serpine2	0.00371474	0.190806	0.303	0.221	58.1803
Ldb2	0.0128599	0.188503	0.397	0.352	197.283
Kdm6a	7.24696e-05	0.187627	0.203	0.093	1.1543
Samd5	0.0039369	0.18646	0.377	0.292	61.6321
Grik2	0.00172359	0.186215	0.386	0.285	27.188
Asb4	0.0235481	0.182895	0.254	0.185	354.776
Cadm4	0.016502	0.181328	0.466	0.416	251.655
Fxyd2	0.0191296	0.179857	0.277	0.21	290.482
Reps2	0.0223707	0.179225	0.534	0.505	337.821
Oprk1	0.00625775	0.179177	0.451	0.356	97.3518
Sema6a	0.00944992	0.179118	0.309	0.231	145.954
Lypd6	0.0201452	0.177937	0.271	0.203	305.32
Tpd52l1	0.0359386	0.17663	0.314	0.26	529.699
Cacna2d2	0.00126073	0.176121	0.723	0.633	19.9207
Mysm1	0.012634	0.175494	0.334	0.27	193.932
Dnajc12	0.0248813	0.174175	0.289	0.231	373.99
Thap3	0.00240223	0.173827	0.46	0.384	37.7919
Mrpl33	0.0011276	0.171101	0.569	0.477	17.8251
C1ql3	0.00309807	0.166084	0.266	0.167	48.6272
Pclo	0.00190642	0.165617	0.831	0.801	30.049
Dynll1	0.000208891	0.164194	0.889	0.843	3.32115
Hmx2	0.164338	0.163509	0.309	0.288	2015.11
Echs1	0.00364124	0.163225	0.234	0.153	57.0509
Pcdh19	0.0131169	0.163035	0.389	0.31	201.134
Gria4	0.00126636	0.162331	0.417	0.306	20.0072
Il1rapl1	0.0105097	0.161716	0.417	0.345	162.028
Strn4	0.0126994	0.161559	0.363	0.295	194.885
Hnrnpm	0.00989779	0.161243	0.443	0.374	152.723
Cnst	0.000641015	0.161005	0.309	0.192	10.1594
Trbc2	0.00370145	0.16056	0.103	0.043	57.9795
mt-Cytb	1.17199e-10	0.16002	1	1	1.8767e-06
Dmd	0.0473101	0.159436	0.426	0.395	684.908
Rasal2	0.00148795	0.158879	0.417	0.31	23.4903
Cdc42se2	0.0718204	0.158486	0.497	0.448	1003.4
Odf2	0.00818302	0.158416	0.6	0.548	126.722
mt-Co3	3.44822e-16	0.157743	1	1	5.52336e-12
Eef1a2	0.00754402	0.157672	0.486	0.409	116.993
Tubb4a	0.00860624	0.157109	0.749	0.747	133.087
Tma7	5.88087e-05	0.156944	0.983	0.968	0.936998
Clasrp	0.102708	0.153865	0.326	0.295	1381.43
Sulf1	0.0131318	0.152798	0.294	0.21	201.35
Ndst4	0.00829113	0.152491	0.449	0.349	128.347
Ccnb1ip1	0.00207977	0.152317	0.363	0.256	32.7689
Rac3	0.00944505	0.152215	0.489	0.423	145.888
Bub3	0.0562238	0.151103	0.651	0.676	801.358
Nnat	0.142665	0.150549	0.826	0.819	1787.6
Chd3os	0.000277002	0.150536	0.994	0.993	4.40101
Cdh11	0.00776352	0.150518	0.197	0.121	120.35
Plxna2	0.18039	0.150402	0.511	0.498	2163.6
Azi2	0.0144548	0.149906	0.483	0.427	221.144
Ndufs5	0.00351582	0.149893	0.717	0.63	55.1035
Prr13	0.00691671	0.149771	0.483	0.409	107.437
Ubald1	0.0120223	0.149455	0.36	0.292	184.939
Ntrk3	0.0170179	0.14906	0.586	0.552	259.234
Spint2	0.0120033	0.148911	0.449	0.381	184.671
Gpc3	0.0319006	0.148819	0.217	0.16	473.373
Lmo4	0.278059	0.148775	0.326	0.31	2698.01
Clpp	0.0134691	0.148548	0.649	0.612	206.401
Ube2m	0.00213614	0.148462	0.454	0.356	33.6506
Mapk10	0.00744235	0.148291	0.594	0.53	115.453
Zer1	0.0122932	0.147782	0.686	0.644	188.995
Vps50	0.00370342	0.146866	0.469	0.388	58.0067
Atp5k	0.00097754	0.146841	0.794	0.754	15.4617
Slc17a8	0.0418568	0.145634	0.109	0.064	610.9
Ankmy2	0.00682601	0.145007	0.349	0.263	106.063
Sf3b5	0.0518167	0.144731	0.291	0.246	746.524
Fam184b	0.00033702	0.144596	0.106	0.032	5.35188
2810403A07Rik	0.0123751	0.14435	0.32	0.246	190.082
Psmb2	0.00756433	0.143618	0.231	0.157	117.3
Kbtbd7	0.0252568	0.143601	0.34	0.281	379.281
Actg1	0.00107628	0.143544	0.94	0.872	17.0182
Pla2g12a	0.0936832	0.143046	0.323	0.281	1273.16
Zfpm2	0.000703085	0.142938	0.143	0.06	11.1376
mt-Nd3	0.00254305	0.142644	0.946	0.943	39.9895
Lrrc8d	0.00734206	0.14211	0.277	0.199	113.934
Kazn	0.0225551	0.140662	0.363	0.302	340.469
Khdrbs3	0.114048	0.139778	0.369	0.342	1509.08
Tcerg1l	0.145014	0.139199	0.237	0.199	1812.39
Hspe1	0.00511271	0.138499	0.846	0.819	79.7684
Ctxn3	0.0656673	0.137658	0.103	0.064	925.647
Atp5g2	0.00125714	0.137462	0.746	0.673	19.8654
Gabra4	0.0201032	0.136619	0.326	0.249	304.764
Dlk1	0.510369	0.136327	0.223	0.21	3009.65
Ncald	0.0338994	0.13614	0.637	0.605	501.372
Phlda3	0.0664501	0.13604	0.397	0.37	935.618
Chrac1	0.080395	0.135856	0.263	0.221	1109.69
Tmem132b	0.00460977	0.13582	0.411	0.313	72.0645
Spry2	0.151446	0.135394	0.134	0.103	1878.68
B630019K06Rik	0.00830939	0.134917	0.746	0.687	128.596
Ndufa3	0.0322349	0.13489	0.717	0.705	478.108
Fndc4	0.0171662	0.134843	0.297	0.217	261.441
Gphn	0.266813	0.134597	0.38	0.367	2643.58
Hmgn2	0.0406793	0.134418	0.623	0.573	595.056
Apopt1	0.0504846	0.134413	0.343	0.295	728.341
Sirt3	0.102164	0.133097	0.463	0.434	1374.82
Gm10076	0.00955695	0.132977	0.666	0.609	147.598
2700097O09Rik	0.0324499	0.131944	0.329	0.263	481.07
Dynlrb1	0.0230619	0.131648	0.734	0.74	347.681
Mphosph6	0.0485508	0.131553	0.269	0.221	702.094
Mrpl20	0.0438599	0.131497	0.403	0.363	638.425
Lix1	0.203857	0.131419	0.189	0.164	2376.98
mt-Co1	4.59437e-11	0.130941	1	1	7.35742e-07
Npm1	1.37681e-05	0.130722	0.966	0.986	0.21978
Pafah1b2	0.0316656	0.130388	0.754	0.744	470.107
Fhl1	0.128357	0.130253	0.569	0.548	1633.6
Fkbp1a	0.0180358	0.129786	0.914	0.932	274.252
Reln	0.0378544	0.12961	0.117	0.071	556.119
Ski	0.0142902	0.129576	0.3	0.221	218.74
Ttc9	0.116818	0.129092	0.329	0.295	1514.77
mt-Nd2	9.88057e-06	0.128738	1	0.993	0.157803
Snrpe	0.046718	0.128281	0.6	0.58	676.897
St7l	0.0184063	0.128094	0.223	0.153	279.61
Dapk1	0.106582	0.127547	0.403	0.391	1426.28
Lin7a	0.0700756	0.127354	0.454	0.42	981.899
Fam155a	0.0314211	0.127171	0.566	0.53	466.572
Ablim2	0.031967	0.127131	0.311	0.246	474.263
Evl	0.0243477	0.127032	0.651	0.637	366.36
Eif2a	0.0883561	0.126611	0.429	0.395	1206.68
Pgr15l	0.340699	0.126403	0.44	0.441	3049.26
Npy2r	0.37891	0.126311	0.614	0.641	2975.2
Atp1a3	0.0118577	0.126207	0.8	0.772	182.502
Celf5	0.0245218	0.125378	0.777	0.74	368.832
Ptms	0.0142354	0.125304	0.834	0.833	217.943
Gm45184	0.911929	0.125172	0.057	0.06	838.974
Hlf	0.587402	0.124906	0.437	0.473	2968.14
Nkx2-1	0.0259984	0.124687	0.22	0.157	389.378
Sox3	0.00421837	0.124559	0.16	0.085	66.0048
Tram1l1	0.165664	0.124451	0.423	0.416	2026.89
Rxrg	0.0219572	0.124139	0.24	0.174	331.773
Tead1	0.0602963	0.124029	0.303	0.253	854.821
Dmtf1	0.0533135	0.123928	0.32	0.27	763.502
Commd7	0.0494622	0.123237	0.251	0.199	714.332
Gtf2h5	0.0841401	0.123046	0.534	0.541	1154.49
Glrx5	0.0153176	0.123013	0.551	0.505	234.053
Hmox2	0.0898011	0.122987	0.331	0.292	1224.53
Slc25a36	0.0289123	0.122978	0.446	0.395	430.823
Ralyl	0.135473	0.122108	0.463	0.456	1710.62
Washc3	0.0713876	0.122103	0.197	0.149	998.141
Ube2s	0.0435979	0.122051	0.614	0.605	634.829
Ccdc85b	0.0406908	0.122023	0.231	0.174	595.143
Snhg9	0.0475247	0.12187	0.294	0.238	687.825
Scn1b	0.0344975	0.121838	0.434	0.399	509.665
Lonrf2	0.0113906	0.12152	0.897	0.897	175.381
Fam162a	0.136925	0.121423	0.24	0.206	1725.39
Sos2	0.128603	0.121127	0.291	0.256	1636.09
Rsrp1	0.00394803	0.120997	0.92	0.886	61.7985
Tmem132c	0.000444933	0.120881	0.08	0.018	7.06019
Slc24a3	0.0406831	0.120752	0.323	0.267	595.072
Slc2a13	0.0658472	0.120651	0.317	0.274	927.655
Shisa9	0.0950204	0.120208	0.491	0.477	1290
Mxi1	0.0249631	0.120189	0.186	0.125	375.021
Limd2	0.113916	0.120151	0.314	0.278	1507.45
Matr3	0.00695151	0.120079	0.929	0.932	107.964
Dynll2	0.0044406	0.120056	0.971	0.979	69.442
Pacsin2	0.117509	0.120049	0.16	0.125	1523.15
Rgl2	0.00754136	0.119951	0.194	0.121	116.959
Trappc2	0.0844335	0.119856	0.394	0.356	1158.34
Armcx4	0.101977	0.119565	0.426	0.402	1372.62
Josd2	0.0497091	0.119006	0.314	0.26	717.799
BC031181	0.0146079	0.118964	0.6	0.548	223.385
Ola1	0.365759	0.118891	0.429	0.431	3157.97
Patz1	0.146062	0.118783	0.197	0.164	1823.3
Usp29	0.0127037	0.118647	0.909	0.932	194.938
Bok	0.0547823	0.118575	0.209	0.157	782.893
Mrps26	0.00615648	0.118395	0.666	0.616	95.8072
Uqcr10	0.000938908	0.117847	0.886	0.9	14.8535
Caln1	0.0405297	0.11775	0.306	0.238	593.112
Sox11	0.079269	0.117507	0.82	0.833	1096.29
Fbl	0.185154	0.117434	0.303	0.281	2203.71
Chodl	0.430754	0.117338	0.211	0.196	3128.14
2210016L21Rik	0.0483512	0.11675	0.709	0.687	699.4
Mafa	0.0161292	0.116573	0.086	0.039	246.132
Ndn	0.0762062	0.116494	0.837	0.808	1057.21
Atp5e	0.038796	0.116224	0.809	0.794	569.02
Nol4	0.0695743	0.11604	0.489	0.448	975.432
Zfp26	0.0693796	0.115655	0.214	0.171	972.771
Arhgap36	0.548388	0.115509	0.337	0.331	3028.75
Ube2z	0.179224	0.115483	0.403	0.395	2152.48
Ftl1	0.00126218	0.11516	0.98	0.975	19.9425
Cdc73	0.0536346	0.115061	0.346	0.288	767.886
Nudt10	0.110237	0.114862	0.363	0.324	1465.27
Aplp1	0.00673005	0.114836	0.871	0.865	104.578
Mrfap1	0.0056227	0.114745	0.986	0.979	87.6466
Wasf1	0.0362019	0.114703	0.449	0.395	533.29
H2afz	0.0332952	0.114588	0.811	0.783	492.935
Atp6v0d1	0.0333246	0.11453	0.549	0.516	493.338
Nr1d1	0.00730234	0.114486	0.157	0.089	113.325
Tmem29	0.0985843	0.114412	0.463	0.427	1333.16
Clip2	0.0482716	0.113419	0.257	0.196	698.394
Pde1c	0.350124	0.113129	0.503	0.505	3079.69
Nfx1	0.0819877	0.112633	0.377	0.335	1128.4
Ptov1	0.145059	0.112628	0.569	0.548	1812.66
Ubl5	0.0176659	0.112516	0.786	0.779	268.734
Fam13a	0.122398	0.112248	0.457	0.409	1568.53
Actr3	0.049881	0.112147	0.631	0.605	720.083
Fam45a	0.104152	0.111943	0.26	0.217	1397.93
Gng2	0.00453516	0.111902	0.929	0.95	70.9072
Nlgn3	0.0746108	0.111784	0.623	0.609	1037.39
Atp6v1g2	0.0551184	0.111759	0.769	0.772	787.256
Sec11a	0.0701223	0.111651	0.28	0.235	982.414
Inafm1	0.122361	0.111593	0.483	0.463	1568.18
Ubxn1	0.0461496	0.111552	0.406	0.335	669.123
Rdh11	0.0794511	0.111486	0.126	0.085	1098.49
Srcin1	0.0245712	0.111388	0.637	0.633	369.526
Rgs9	0.0249162	0.111364	0.229	0.167	374.415
Dcaf8	0.20514	0.111359	0.483	0.48	2389.47
Abhd14a	0.0639827	0.111231	0.166	0.121	903.563
Gda	0.100394	0.111176	0.634	0.569	1354.61
Dda1	0.0356933	0.110991	0.574	0.527	526.298
Lzts1	0.0992793	0.110986	0.203	0.164	1341.46
Atp8a1	0.244748	0.110777	0.731	0.751	2669.71
Abcc5	0.0927551	0.110726	0.454	0.427	1261.56
Tmod2	0.0113245	0.110649	0.831	0.836	174.375
Frmpd4	0.122246	0.11052	0.291	0.249	1567.07
Snhg20	0.0168066	0.110509	0.591	0.516	256.183
Mzt1	0.147241	0.110345	0.62	0.609	1836.54
Ncan	0.0531602	0.110271	0.24	0.185	761.361
Ccm2	0.234529	0.110249	0.22	0.196	2593.42
Blvra	0.0104798	0.110036	0.171	0.103	161.587
Zim1	0.511644	0.110016	0.377	0.391	3011.03
Fkbp8	0.0172825	0.110006	0.663	0.612	263.091
Phf24	0.0398748	0.109801	0.446	0.388	584.086
Rnf4	0.112754	0.109712	0.44	0.413	1493.09
2810001G20Rik	0.0689555	0.109673	0.26	0.214	967.515
Gm5914	0.140721	0.109533	0.151	0.117	1765.62
Ppp1cb	0.0203155	0.109531	0.76	0.772	307.759
Fam131a	0.117922	0.109294	0.466	0.459	1527.44
Tesk1	0.0399603	0.109169	0.269	0.206	585.219
Cenpx	0.108833	0.108926	0.311	0.274	1451.18
Hmgn3	0.0303997	0.108703	0.677	0.651	452.166
Galntl6	0.206478	0.10869	0.254	0.224	2365.62
Flrt3	0.178205	0.108544	0.463	0.441	2144.87
Marcksl1	0.0268517	0.108431	0.86	0.865	401.621
Cmpk1	0.130845	0.108369	0.491	0.459	1660.68
Srp9	0.123689	0.108251	0.666	0.69	1582.6
Ube2j2	0.0986837	0.108198	0.36	0.324	1334.4
Eif4e2	0.0371836	0.108049	0.28	0.221	546.711
Mblac2	0.438491	0.107808	0.417	0.431	3118.55
March7	0.120894	0.107735	0.494	0.473	1552.15
Romo1	0.0330102	0.107623	0.629	0.591	489.046
N4bp2l1	0.0384069	0.107618	0.331	0.26	563.736
Mid1	0.00813062	0.107343	0.183	0.11	125.927
Rimklb	0.226125	0.107246	0.397	0.377	2524.01
Grm1	0.0330502	0.107223	0.206	0.146	489.54
Acd	0.139728	0.10722	0.194	0.157	1755.69
mt-Co2	3.51177e-06	0.107143	1	0.996	0.0561286
Mn1	0.00864027	0.106962	0.169	0.1	133.596
Tmem255a	0.281215	0.10692	0.82	0.833	2716.26
Myh10	0.0941468	0.10671	0.56	0.509	1278.89
Ptprr	0.103151	0.106659	0.16	0.121	1385.93
Btbd3	0.112349	0.106514	0.383	0.345	1488.51
Pcdh9	0.128819	0.106496	0.563	0.537	1638.57
Mark4	0.0368471	0.106479	0.246	0.189	541.947
Naa38	0.100713	0.106258	0.463	0.431	1358.42
Elmod1	0.130232	0.106115	0.654	0.673	1654.34
Srp14	0.0613461	0.106048	0.734	0.69	868.599
Polr3a	0.0514546	0.105992	0.24	0.185	741.718
Ndufv2	0.0750573	0.105931	0.543	0.502	1042.92
Stk19	0.165129	0.105762	0.323	0.302	2021.34
Igf1	0.00515724	0.104852	0.091	0.036	80.453
Gpcpd1	0.0375068	0.104695	0.357	0.295	551.35
Dgat2	0.0512897	0.104597	0.157	0.11	739.547
St8sia3	0.150078	0.104584	0.637	0.651	1865.77
Adcy7	0.0526288	0.104488	0.203	0.146	757.486
Sox1	0.0312505	0.104451	0.231	0.171	464.257
Slc4a10	0.153682	0.104337	0.494	0.484	1900.73
Ppp2r1a	0.10848	0.104299	0.649	0.673	1447.23
Atp5d	0.0983512	0.104147	0.554	0.534	1330.3
Csde1	0.0456055	0.104088	0.854	0.861	661.69
Grem2	0.0625437	0.104084	0.149	0.103	884.619
Gm28050	0.330105	0.103974	0.251	0.238	3001.98
Banf1	0.160725	0.10384	0.323	0.299	1976.28
Zfp706	0.0169218	0.103709	0.746	0.698	257.905
Rnf138	0.025731	0.103663	0.266	0.199	385.475
Ctnnb1	0.0255616	0.103648	0.634	0.573	383.143
Nppc	0.198542	0.103433	0.12	0.093	2327.51
Cul5	0.213793	0.103362	0.44	0.438	2432.53
2900055J20Rik	0.0488456	0.103163	0.271	0.21	705.966
Brk1	0.0290296	0.103161	0.714	0.715	432.483
Gria1	0.071228	0.103007	0.723	0.719	996.194
Hcn2	0.0161668	0.102693	0.197	0.132	246.69
Derl2	0.33242	0.102455	0.194	0.181	3013.72
Timm13	0.0834011	0.102361	0.617	0.616	1145.43
P2ry1	0.0756207	0.102026	0.089	0.053	1049.77
2410131K14Rik	0.086958	0.101993	0.131	0.093	1189.67
Lonrf1	0.0667225	0.101647	0.151	0.107	938.853
Rab10	0.0945662	0.101615	0.694	0.68	1284.3
Camk2d	0.0633406	0.101539	0.62	0.587	894.94
mt-Nd4	2.62456e-05	0.101463	1	0.996	0.418696
Anp32a	0.0216446	0.101395	0.691	0.637	327.375
2310009B15Rik	0.376853	0.101394	0.369	0.367	2969.6
Dcaf17	0.174851	0.101346	0.28	0.242	2113.95
Pole4	0.0367556	0.101287	0.214	0.153	540.748
Ccdc43	0.0232663	0.101232	0.194	0.128	350.623
Tomm20	0.0419761	0.101209	0.891	0.9	612.431
Prdx3	0.0897218	0.101111	0.383	0.335	1223.89
Apc2	0.0978312	0.101093	0.46	0.416	1323.95
Frg1	0.20365	0.101065	0.211	0.181	2374.76
Larp4	0.972066	0.100957	0.277	0.295	267.318
Csf2ra	0.0384557	0.100933	0.137	0.089	564.338
Ugcg	0.244962	0.100792	0.391	0.367	2671.31
Hnrnpc	0.0528849	0.100768	0.643	0.616	760.908
Cplx2	0.127004	0.100764	0.591	0.569	1619.3
Egln2	0.242327	0.100729	0.434	0.434	2653.72
D1Ertd622e	0.101567	0.10059	0.22	0.174	1367.39
Polr2e	0.184706	0.100566	0.251	0.217	2200.03
Grm8	0.0112402	0.100543	0.14	0.078	173.11
Pus7	0.084086	0.100158	0.129	0.089	1153.91
Hcfc1r1	0.0595561	0.100101	0.526	0.498	845.161
Rbm39	0.162074	0.100062	0.98	0.972	1990.75
Syt5	0.291883	0.0999774	0.506	0.541	2787.19
Gprasp1	0.0280803	0.0998519	0.957	0.947	418.958
Klhdc1	0.100637	0.09979	0.194	0.153	1357.49
Gm47283	0.239885	0.0996604	0.497	0.498	2636.34
Tspyl3	0.456869	0.0996522	0.334	0.338	3080.67
Ctxn1	0.046717	0.0995731	0.9	0.879	676.929
Samd10	0.023918	0.0995171	0.18	0.117	360.157
Vma21	0.124996	0.099488	0.469	0.434	1597.2
Bpgm	0.473201	0.0994858	0.214	0.206	3109.4
Sub1	0.0144401	0.099399	0.906	0.911	220.947
Zfp451	0.142861	0.0992261	0.517	0.484	1789.04
Rhoa	0.747224	0.0991162	0.497	0.534	2458.37
Calm3	0.0587442	0.0990654	0.92	0.915	835.167
Nfat5	0.298669	0.0989859	0.4	0.388	2834.37
Stmn2	0.00468244	0.0988899	0.989	0.979	73.1725
Gcc2	0.126142	0.0988824	0.563	0.559	1609.95
Celf3	0.138813	0.0988585	0.526	0.53	1745.3
Cd24a	0.0395575	0.0983337	0.223	0.16	579.675
Gm10419	0.212344	0.0981505	0.349	0.324	2419.44
Gm49359	0.0147894	0.0981184	0.109	0.057	226.115
Zcchc12	0.0420912	0.0980968	0.98	0.961	614.027
Camk2n2	0.164351	0.0980903	0.686	0.673	2015.11
Thy1	0.216046	0.0980552	0.711	0.708	2452.34
Kdm5c	0.0706549	0.0979101	0.243	0.189	988.957
Tmem258	0.0487805	0.0977973	0.263	0.199	705.073
Stum	0.299162	0.0977313	0.266	0.242	2837.26
Trappc6b	0.235454	0.0976906	0.729	0.79	2600.83
Cask	0.291972	0.0975365	0.491	0.495	2787.46
Kcnd3	0.0248996	0.0974389	0.297	0.221	374.216
Ccdc74a	0.433972	0.0974222	0.269	0.263	3115.05
Caap1	0.13637	0.0974045	0.206	0.167	1719.35
Fundc1	0.046778	0.0973615	0.46	0.402	677.673
Tial1	0.140632	0.0973387	0.603	0.569	1764.79
Maml3	0.0755399	0.0972386	0.163	0.117	1048.72
Max	0.184478	0.0971975	0.394	0.359	2198.61
Nsmce3	0.488656	0.097085	0.277	0.278	3100.52
Hdac9	0.0319452	0.097082	0.12	0.071	473.971
Snx4	0.0200246	0.0970513	0.394	0.31	303.633
Ankrd40	0.262208	0.0969141	0.24	0.217	2801.44
Vhl	0.0239784	0.0968303	0.149	0.093	361.043
Raf1	0.0670414	0.0967043	0.317	0.267	942.937
Pts	0.0432735	0.0966956	0.269	0.206	630.495
Tigd2	0.870747	0.0966529	0.354	0.388	1505.52
Ube2v2	0.0242086	0.0962397	0.657	0.616	364.363
Uvrag	0.354113	0.0960817	0.146	0.128	3091.06
Ssx2ip	0.196781	0.0960059	0.451	0.445	2314.34
Gabarapl1	0.0082948	0.0957577	0.977	0.993	128.395
Cfap97	0.228888	0.0957144	0.357	0.345	2547.07
Ankrd54	0.657348	0.0954931	0.214	0.214	2896.93
Mgat4c	0.0345723	0.0952767	0.466	0.395	510.737
Armc1	0.123805	0.0952734	0.483	0.463	1583.96
Ptp4a3	0.0593817	0.0952561	0.166	0.117	843.042
Cend1	0.267268	0.0952262	0.591	0.651	2647.02
Fgf14	0.0590371	0.0950865	0.286	0.224	838.799
Prkx	0.034304	0.0950322	0.083	0.043	507.013
Napb	0.0225261	0.0949814	0.951	0.915	340.098
Svop	0.117989	0.0949552	0.543	0.544	1528.19
Ppp3cb	0.137258	0.0948299	0.743	0.751	1728.35
Rora	0.0250496	0.0947748	0.171	0.11	376.245
Dhx30	0.255648	0.094742	0.643	0.619	2751.03
Ndufa8	0.114672	0.0947318	0.64	0.648	1515.62
Thsd7b	0.183086	0.0947157	0.151	0.121	2186.23
Abcd3	0.102773	0.0946434	0.383	0.342	1381.99
Cbx5	0.0629424	0.094563	0.877	0.893	889.754
Zfp821	0.0829651	0.0944497	0.289	0.238	1140.02
Tmem219	0.139322	0.0944199	0.246	0.21	1751
Oscp1	0.359352	0.0941989	0.303	0.295	3119.18
Narf	0.0540608	0.0940735	0.223	0.164	773.61
Anapc13	0.228474	0.0939737	0.483	0.452	2544.06
Glce	0.228517	0.0939441	0.251	0.221	2544.31
Ubqln2	0.255565	0.0939197	0.691	0.708	2750.65
Trip12	0.304097	0.0939196	0.52	0.534	2865.51
Cd2bp2	0.124315	0.0939054	0.286	0.235	1589.87
Zfp397	0.115094	0.0938672	0.271	0.235	1495.31
Dnttip2	0.0785023	0.0938327	0.157	0.114	1086.79
Fgfr1op2	0.187713	0.0936874	0.529	0.491	2226.84
Il13ra1	0.0256946	0.0936792	0.297	0.224	385.034
Tmem242	0.0915908	0.0935613	0.457	0.413	1246.92
Ndufa10	0.378437	0.0934746	0.554	0.559	2974.89
Gtf2ird1	0.479629	0.0933562	0.266	0.26	3121.91
Atp6v1g1	0.085408	0.0932271	0.777	0.772	1170
Mfng	0.0261256	0.0929545	0.094	0.05	391.152
Selenow	0.00224864	0.092866	0.997	1	35.3936
Tub	0.135057	0.0928209	0.797	0.808	1706.85
1700023F06Rik	0.30797	0.0927361	0.346	0.331	2887.22
Lnpk	0.0963426	0.0927131	0.546	0.52	1306.31
Ncstn	0.188012	0.0924803	0.2	0.167	2229.45
Svbp	0.21667	0.0922407	0.34	0.324	2457.9
Cckbr	0.0060487	0.0921894	0.094	0.039	94.1964
Uqcrq	0.116384	0.0921459	0.72	0.722	1510.32
Cdk4	0.176963	0.0920666	0.269	0.235	2134
Med28	0.104195	0.0919776	0.814	0.819	1398.4
Hmgn5	0.00607952	0.0919586	0.106	0.046	94.6704
Dph5	0.0363632	0.0918132	0.169	0.114	535.557
Mrps2	0.0536802	0.0918099	0.154	0.107	768.432
Nol7	0.204141	0.0917884	0.669	0.662	2379.47
Cdk17	0.085928	0.0916924	0.351	0.295	1176.44
Mtfp1	0.133542	0.0916151	0.343	0.302	1690.78
Taf9b	0.11419	0.0915788	0.217	0.174	1510.63
Polr2l	0.113203	0.0914254	0.329	0.288	1498.58
Xrcc3	0.0198584	0.0913296	0.097	0.05	301.212
Prnp	0.0518009	0.0913177	0.951	0.968	746.399
Trhde	0.000310443	0.0912489	0.077	0.014	4.93108
Sash1	0.171658	0.091144	0.28	0.246	2084.1
Lrrtm4	0.127926	0.0911088	0.209	0.167	1628.88
Lsm7	0.401289	0.0910666	0.56	0.584	3055.41
Zfp148	0.333681	0.0910589	0.363	0.349	3019.15
Hnrnph3	0.196134	0.0910363	0.506	0.491	2307.52
Gm34466	0.004358	0.0910315	0.037	0.004	68.1722
Uqcr11	0.0764087	0.090954	0.691	0.658	1059.71
Sgip1	0.195759	0.0906155	0.823	0.854	2304.09
Ciapin1	0.224563	0.0906134	0.203	0.178	2509.94
Nudt19	0.12439	0.0905937	0.466	0.456	1590.57
Sh3bgrl3	0.329695	0.090566	0.62	0.619	3000.88
Uevld	0.0195368	0.0904768	0.111	0.06	296.471
Psma5	0.130194	0.0903797	0.44	0.399	1653.99
Gm2000	0.0498158	0.0903562	0.48	0.431	719.241
Ext2	0.202546	0.0903477	0.194	0.164	2363.71
Bcor	0.0461712	0.0903358	0.183	0.128	669.298
Snapc1	0.16114	0.0901676	0.394	0.363	1980.41
Rnf2	0.0751456	0.090028	0.254	0.203	1043.85
Csnk1g2	0.126665	0.0900138	0.337	0.295	1615.74
Polr2h	0.0965003	0.0900106	0.134	0.096	1308.06
Kxd1	0.1403	0.0899145	0.374	0.324	1761.19
Sorcs3	0.269518	0.0899143	0.429	0.402	2657.71
Morn2	0.187501	0.0898835	0.363	0.32	2224.7
Rnf157	0.246675	0.0897641	0.471	0.456	2684.81
Slc25a17	0.292707	0.0897432	0.274	0.26	2791.84
Dnajb4	0.346232	0.0896502	0.597	0.612	3067.27
Macf1	0.130505	0.0892228	0.843	0.822	1657.15
Cnot7	0.448228	0.0891143	0.486	0.502	3061.85
Rundc3b	0.4186	0.0891106	0.389	0.388	3118.15
Prkar1a	0.00709532	0.0890826	0.983	0.982	110.183
Ptpn1	0.647393	0.0890515	0.2	0.203	2913.92
Hist3h2ba	0.186768	0.0890038	0.34	0.306	2218.05
Tmem87b	0.124258	0.0889451	0.286	0.242	1589.26
Ccdc184	0.356338	0.0888395	0.297	0.278	3100.49
Fam76a	0.152781	0.0888216	0.529	0.512	1891.42
Ubb	0.0393804	0.0887796	0.946	0.954	577.199
Nmt2	0.552563	0.0885652	0.494	0.537	3030.81
Med12l	0.14169	0.0885283	0.197	0.16	1776.94
Hs3st4	0.0278155	0.0884204	0.169	0.11	415.314
Pdlim7	0.134512	0.0883056	0.34	0.299	1701.18
Fbrsl1	0.646756	0.0882987	0.257	0.26	2916.22
Dclk1	0.0993482	0.0882348	0.843	0.843	1342.19
Stmn3	0.0298973	0.0882166	0.874	0.904	445.081
Mtmr9	0.195235	0.0882048	0.263	0.231	2299.67
Mrpl17	0.206367	0.0881195	0.349	0.32	2364.76
Znrf1	0.281557	0.0880203	0.369	0.352	2718.15
Pdzd8	0.25697	0.0880058	0.323	0.295	2760.38
Sp3	0.128585	0.0879506	0.231	0.196	1635.98
Snrpd3	0.0826679	0.0879279	0.3	0.263	1136.6
Rab34	0.1357	0.0878773	0.306	0.27	1712.67
Dcx	0.334112	0.0877467	0.289	0.263	3022.05
Ahsa1	0.100215	0.0877101	0.394	0.342	1352.51
Cebpzos	0.262192	0.0875018	0.403	0.391	2801.52
Atp6v0a1	0.15244	0.0874524	0.651	0.676	1888.43
C1d	0.313118	0.0874155	0.837	0.843	2915.76
Cnih2	0.136265	0.0873738	0.76	0.73	1718.3
Rwdd4a	0.268154	0.0873287	0.226	0.203	2649.9
Ildr2	0.41899	0.0872807	0.469	0.491	3118.54
Ube2l3	0.119052	0.0872246	0.677	0.662	1540.41
Nme5	0.10399	0.0871795	0.117	0.082	1396.16
Thumpd1	0.327037	0.0871756	0.28	0.267	2989.45
Polr2f	0.220006	0.0871568	0.531	0.537	2482.1
Syt13	0.0576267	0.0870912	0.606	0.566	820.086
Slc39a11	0.142893	0.0869564	0.163	0.128	1789.31
Phf20l1	0.403292	0.0868417	0.597	0.591	3060.18
Nkd2	0.0804195	0.0868156	0.066	0.036	1109.87
Chtop	0.349719	0.0867063	0.5	0.512	3078.93
Mapre1	0.547891	0.0866617	0.554	0.548	3028.74
Arf3	0.0711209	0.086659	0.866	0.879	994.981
Dmtn	0.284895	0.0866579	0.551	0.537	2742.68
Igf2r	0.183333	0.0866444	0.206	0.174	2188.08
2610524H06Rik	0.195592	0.0865541	0.291	0.256	2302.71
Nudt11	0.127994	0.0864443	0.511	0.466	1629.63
Rsl24d1	0.0798034	0.0864137	0.414	0.37	1102.72
Faap20	0.0965917	0.0863932	0.346	0.299	1309.01
Jph3	0.431561	0.0863591	0.406	0.413	3116.31
Rab7	0.4284	0.0862799	0.654	0.715	3141.46
Yeats4	0.183392	0.0862713	0.354	0.324	2188.42
Znhit1	0.180452	0.0862407	0.523	0.509	2163.98
Slc9a8	0.0425912	0.0861678	0.171	0.117	620.98
Esr1	0.116011	0.0861646	0.817	0.797	1505.94
Scoc	0.0552707	0.0860022	0.843	0.875	789.099
Gm6710	0.0591159	0.0858528	0.177	0.128	839.8
Tmem5	0.541436	0.085782	0.334	0.335	3025.55
Mrps21	0.397301	0.0857704	0.429	0.413	3039.36
Glrx2	0.214514	0.0856153	0.36	0.338	2439.23
Micu1	0.261096	0.0855972	0.22	0.203	2792.42
Agpat4	0.509416	0.0855291	0.44	0.463	3012.68
Tshz1	0.249668	0.0854559	0.297	0.263	2707.15
Tmem263	0.233236	0.0854223	0.317	0.288	2581.93
Pebp1	0.0646174	0.0852577	0.846	0.847	911.945
4930453N24Rik	0.274313	0.0852571	0.137	0.117	2680.31
Nit2	0.0150934	0.0851794	0.106	0.053	230.702
Aatk	0.202059	0.0851286	0.574	0.555	2359.84
Ndufs6	0.275352	0.0850959	0.583	0.562	2684.41
Usp33	0.112987	0.0850695	0.5	0.473	1495.95
Drd2	0.0131667	0.085017	0.083	0.036	201.859
Msi2	0.42385	0.0849888	0.451	0.466	3132.25
Kdm5b	0.552932	0.0849608	0.351	0.352	3028.41
Atad1	0.0593156	0.0849094	0.56	0.505	842.281
Pcdhb7	0.157294	0.0847934	0.089	0.06	1939.75
Ankrd35	0.0621101	0.0846716	0.163	0.114	879.045
Rab3b	0.178548	0.084584	0.237	0.203	2146.68
Zscan18	0.348148	0.0844456	0.231	0.214	3073.8
Slc25a11	0.119205	0.0844356	0.369	0.331	1542.04
Sar1a	0.166534	0.0844103	0.526	0.488	2034.37
Dhrs13	0.00861326	0.0843885	0.103	0.046	133.187
Rasa1	0.585733	0.0842656	0.297	0.292	2968.5
Retreg2	0.173354	0.0840373	0.617	0.616	2099.49
Endov	0.153394	0.0840291	0.166	0.132	1897.64
Rab5a	0.0916633	0.083977	0.631	0.609	1247.63
Rab3gap1	0.370468	0.0839314	0.403	0.395	3181.95
AC160336.1	0.108864	0.0837267	0.586	0.552	1451.27
Gstz1	0.396123	0.0836558	0.251	0.238	3036.68
Pcbp4	0.38562	0.0836072	0.409	0.416	3005.14
AI413582	0.0945855	0.0834876	0.586	0.573	1284.47
Fam208b	0.205388	0.0834406	0.191	0.16	2391.33
Tmem250-ps	0.191967	0.0833828	0.323	0.295	2268.09
0610010F05Rik	0.29399	0.083231	0.291	0.267	2800.84
Hspa8	0.0661925	0.083173	0.96	0.964	932.321
Nrg1	0.140198	0.0831412	0.146	0.11	1760.18
Gm14419	0.0295837	0.082972	0.109	0.06	440.591
Esd	0.0746283	0.0829211	0.529	0.498	1037.56
Zfp974	0.0145416	0.0828948	0.091	0.043	222.457
Pdia3	0.311408	0.082855	0.411	0.402	2905.44
Nbdy	0.217648	0.0828452	0.711	0.694	2467.48
Eif4g2	0.0331607	0.0828215	0.934	0.95	491.11
Psmb4	0.11772	0.0828155	0.534	0.498	1525.3
Crb1	0.277136	0.0827829	0.123	0.1	2694.59
Tipin	0.223908	0.0827319	0.171	0.142	2504.86
Syt16	0.12598	0.08273	0.28	0.231	1608.13
Sptan1	0.207406	0.0826238	0.634	0.669	2373.13
Fyttd1	0.525324	0.0825998	0.583	0.637	3006.95
Xylt1	0.0024398	0.0825792	0.074	0.021	38.3804
Ap1s1	0.121764	0.0825393	0.623	0.58	1561.99
Pgam1	0.25281	0.0824775	0.751	0.765	2732.37
1700048O20Rik	0.117257	0.0824058	0.12	0.085	1520.01
Paics	0.0809452	0.0823916	0.326	0.27	1116.32
Naa20	0.250905	0.0823719	0.271	0.246	2717.3
Gabarap	0.246356	0.0823692	0.743	0.74	2682.08
Usp27x	0.29497	0.0822623	0.314	0.295	2809.3
Ppp2r5d	0.105593	0.0822525	0.283	0.238	1414.42
Zmym3	0.138158	0.0822142	0.594	0.569	1737.75
Celsr3	0.173383	0.0822119	0.2	0.171	2099.5
Pitpnc1	0.15294	0.0821572	0.451	0.431	1893.25
Wipi1	0.263411	0.0819614	0.117	0.093	2810.07
Npdc1	0.196122	0.0819138	0.637	0.605	2307.57
Map3k12	0.353241	0.0819073	0.414	0.395	3088.39
Tada1	0.18973	0.0817996	0.243	0.206	2245.45
Ccdc58	0.24523	0.0817902	0.111	0.089	2673.5
Znhit2	0.181949	0.08149	0.291	0.26	2176.29
Tsc1	0.498819	0.081446	0.52	0.569	3059.26
Tigar	0.136949	0.0813667	0.206	0.174	1725.42
Mcee	0.200434	0.0812892	0.24	0.206	2345.28
1500011B03Rik	0.089778	0.0811651	0.82	0.833	1224.3
Ap2m1	0.456619	0.0811585	0.723	0.733	3080.81
Dctn6	0.710702	0.0810907	0.329	0.352	2604.72
Atp5c1	0.16876	0.0810428	0.629	0.619	2055.66
Tkt	0.438922	0.0810296	0.331	0.32	3101.42
Extl3	0.145613	0.0810099	0.229	0.189	1818.7
Gm5577	0.0366919	0.0809524	0.16	0.103	539.995
Ppp1r16a	0.337401	0.080948	0.237	0.221	3034.25
Ift57	0.0463923	0.0809011	0.157	0.107	672.41
Lamtor1	0.233511	0.0808311	0.586	0.562	2584.5
Snrnp40	0.215187	0.0807841	0.206	0.174	2445.17
Ptcd2	0.160352	0.0806153	0.151	0.121	1972.17
Gpx4	0.109398	0.0805977	0.897	0.943	1455.97
Smarca5	0.277087	0.0805347	0.594	0.616	2694.67
Smyd3	0.490257	0.0804689	0.311	0.31	3088.13
Lrch2	0.107445	0.0804416	0.291	0.246	1436.22
Eif3g	0.109235	0.0803549	0.371	0.327	1454.57
Get4	0.367206	0.0803391	0.234	0.214	3164.21
Ric8a	0.188916	0.0802751	0.166	0.135	2237.52
Cope	0.389674	0.0802582	0.334	0.32	3019.2
Stk32a	0.543448	0.0802196	0.171	0.164	3025.92
N4bp1	0.479913	0.0801644	0.469	0.491	3121.36
Mtus1	0.199298	0.0800979	0.206	0.174	2334.97
Hpcal4	0.223149	0.0800825	0.68	0.698	2499.04
Aftph	0.220964	0.0800024	0.4	0.384	2486.73
Emb	0.389037	0.0799894	0.274	0.27	3016.2
Polr1c	0.223949	0.0799093	0.297	0.274	2505.09
Ppp1r7	0.423497	0.0798055	0.286	0.274	3133.03
Cbll1	0.184432	0.0797648	0.169	0.139	2198.43
Ccdc92b	0.223131	0.079688	0.143	0.117	2499.07
Frmd4a	0.196983	0.0796665	0.549	0.52	2315.54
Smg9	0.0715312	0.079627	0.14	0.096	999.72
Tfb2m	0.26619	0.0795968	0.131	0.107	2644.34
Armc9	0.15723	0.0795312	0.3	0.267	1939.11
Cdh10	0.314166	0.079519	0.226	0.203	2923
Slc25a20	0.0946381	0.0793096	0.109	0.071	1285
Ascc3	0.118033	0.0790932	0.237	0.189	1528.64
Gart	0.217244	0.0790319	0.223	0.192	2463.55
Chadl	0.172524	0.0789623	0.209	0.171	2090.65
Gabrb1	0.154387	0.0787144	0.834	0.883	1908.07
Rnf112	0.261308	0.078661	0.534	0.527	2793.12
Csrp1	0.0214657	0.078633	0.083	0.039	324.797
Zfp365	0.177359	0.0785803	0.466	0.459	2137.53
Eif4a2	0.0561891	0.0785282	0.994	0.996	800.92
Fam32a	0.64296	0.0782615	0.449	0.477	2929.32
Tmem91	0.246963	0.078179	0.64	0.626	2685.48
Mib1	0.450857	0.0780733	0.369	0.359	3068.53
Abhd6	0.304548	0.077979	0.257	0.235	2868.84
Gulp1	0.0301574	0.0779333	0.06	0.025	448.713
Ndufc1	0.280024	0.0779252	0.717	0.744	2706.71
Cfl1	0.132904	0.0779224	0.897	0.907	1683.49
Rcor1	0.234857	0.077875	0.126	0.1	2595.64
Mbtps2	0.302804	0.0777956	0.186	0.16	2857.87
Kdm3b	0.215892	0.0777312	0.163	0.132	2451.46
Cox7a2	0.3296	0.0776412	0.829	0.847	3000.68
Xpo1	0.462612	0.0775776	0.357	0.37	3093.48
Nt5c3b	0.124871	0.0775447	0.134	0.1	1595.85
Sdhaf4	0.414035	0.0774955	0.269	0.249	3102.78
1110051M20Rik	0.836975	0.0774189	0.303	0.32	1740.07
Asnsd1	0.137988	0.0772824	0.146	0.11	1736.02
Smim7	0.318834	0.0772207	0.297	0.281	2950.49
Tmem259	0.903708	0.0770895	0.231	0.246	903.708
Tdp2	0.225687	0.0770846	0.134	0.11	2519.57
Ccny	0.130953	0.077063	0.229	0.189	1661.79
Ptprd	0.541733	0.0770021	0.617	0.609	3025.04
mt-Atp8	0.119354	0.0769389	0.569	0.562	1543.6
Ankrd49	0.0932906	0.076927	0.183	0.139	1268.38
Myg1	0.190025	0.0768877	0.171	0.139	2248.18
Sec61a1	0.386566	0.0768629	0.411	0.402	3006.71
Strap	0.182968	0.0768623	0.531	0.52	2185.19
Raly	0.596322	0.0768263	0.206	0.206	2964.92
Elavl1	0.219598	0.0766584	0.437	0.402	2478.16
Nav2	0.439423	0.0765636	0.417	0.416	3101.89
Tmem11	0.225207	0.0764166	0.249	0.221	2515.79
Gigyf2	0.312013	0.0762592	0.463	0.48	2908.89
Pank3	0.102081	0.0762281	0.303	0.253	1373.8
Thap4	0.200732	0.0761794	0.16	0.132	2347.16
Arvcf	0.0489367	0.0761074	0.169	0.114	707.185
Ipo7	0.483009	0.0761043	0.383	0.384	3119.75
Brinp1	0.39998	0.0760345	0.423	0.416	3050.25
Ppfia4	0.218493	0.0759905	0.3	0.267	2471.6
Ndufb9	0.100436	0.0759876	0.654	0.63	1355.09
Rer1	0.443215	0.0759729	0.434	0.448	3047.11
Hspb11	0.196576	0.0759614	0.234	0.203	2312.32
Cd200	0.173976	0.0758559	0.791	0.779	2105.11
Tnfrsf21	0.138766	0.0758414	0.414	0.359	1744.99
Paxbp1	0.633612	0.0758222	0.3	0.313	2945.03
Mgst3	0.0956085	0.0757878	0.094	0.06	1297.41
Sde2	0.0928166	0.0757594	0.266	0.214	1262.31
Nelfa	0.645121	0.07575	0.16	0.153	2923.04
Ppp1r13b	0.157466	0.0757248	0.371	0.335	1941.4
Tmem14c	0.390056	0.0757135	0.18	0.164	3018.25
Ilk	0.601713	0.0757023	0.22	0.221	2962.23
Cetn2	0.813691	0.075492	0.306	0.327	2035.04
B4galt3	0.362088	0.0754065	0.223	0.21	3137.13
Fabp5	0.42025	0.0753194	0.451	0.466	3122.45
Sft2d1	0.133257	0.0753063	0.4	0.359	1687.71
Pnoc	0.319686	0.0752358	0.263	0.235	2954.22
Acot7	0.200665	0.0752197	0.511	0.48	2346.98
Slc29a4	0.892521	0.075192	0.151	0.157	991.591
Glrx3	0.272322	0.0750793	0.343	0.327	2673.93
Ldlr	0.0878096	0.075034	0.206	0.157	1199.74
Tmem165	0.322976	0.0750285	0.217	0.196	2969.77
Grsf1	0.694739	0.0749608	0.363	0.377	2730.32
Fam117b	0.410749	0.0749289	0.471	0.463	3088.43
Ift43	0.0576849	0.0748303	0.083	0.046	820.856
Timm29	0.680043	0.0747894	0.314	0.324	2840.54
Cntnap5a	0.88956	0.074771	0.446	0.484	1018.55
Brs3	0.324034	0.0747094	0.217	0.189	2973.98
Tceal8	0.284988	0.0746173	0.274	0.246	2743.29
Trim46	0.407561	0.0746164	0.257	0.242	3077.08
St3gal4	0.36316	0.0746147	0.151	0.132	3142.06
Hsf1	0.275881	0.0745414	0.237	0.214	2688.73
B230334C09Rik	0.299702	0.0745309	0.543	0.548	2840.27
Pcbp2	0.119353	0.07451	0.9	0.851	1543.71
Prkar1b	0.186174	0.0744897	0.949	0.947	2212.86
Ctnnbl1	0.0591292	0.0744652	0.14	0.093	839.872
Smyd5	0.218699	0.0744569	0.303	0.281	2473.49
Pcmtd2	0.459431	0.0743572	0.34	0.335	3086.46
Pigt	0.197848	0.0743483	0.22	0.185	2321.94
Trib2	0.276846	0.0743423	0.266	0.238	2693.43
Cyb5a	0.289744	0.0742977	0.489	0.463	2772.56
Trpm4	0.079165	0.0742761	0.149	0.107	1095.01
Sh2b1	0.132848	0.0742348	0.206	0.167	1682.92
Rab15	0.273234	0.0741576	0.417	0.391	2676.32
Ddx19b	0.045686	0.0741526	0.071	0.036	662.721
Slc18b1	0.284848	0.074099	0.106	0.085	2742.51
Paip2	0.147924	0.0740853	0.76	0.751	1843.58
Cwc15	0.540667	0.0738766	0.457	0.48	3024.49
Dnajc18	0.41232	0.0738662	0.451	0.459	3094.46
Pck2	0.439207	0.0738584	0.194	0.181	3101.68
Sema6c	0.119128	0.0738198	0.126	0.089	1541.16
Sf3a2	0.0193406	0.0738047	0.074	0.032	293.571
Fam81a	0.40349	0.0737948	0.209	0.192	3061.28
Ptbp2	0.154743	0.07376	0.597	0.569	1912.01
Abracl	0.121869	0.07363	0.117	0.082	1563.22
Arf5	0.332648	0.0736262	0.586	0.605	3014.79
Mtif2	0.498478	0.0735608	0.203	0.196	3059.66
Etnk1	0.0801935	0.0735148	0.837	0.808	1107.39
Ergic1	0.317475	0.0735024	0.48	0.491	2945.21
Mcoln1	0.289189	0.0734996	0.166	0.142	2770.14
Twistnb	0.279791	0.0734879	0.303	0.285	2705.3
Xpr1	0.311609	0.0734297	0.709	0.722	2906.69
Spcs1	0.564845	0.0734105	0.491	0.488	3023.05
Nkain2	0.270979	0.0733938	0.206	0.181	2666.71
Kcnab2	0.140949	0.073106	0.194	0.153	1768.21
Myh7	0.340136	0.0731043	0.103	0.082	3049.32
Kcnj9	0.482018	0.0730441	0.286	0.281	3120.59
Smarcad1	0.765647	0.072976	0.24	0.253	2321.44
Hipk3	0.273827	0.0729597	0.38	0.356	2680.22
Ecsit	0.179461	0.0729421	0.234	0.196	2154.43
Asna1	0.340823	0.0729249	0.2	0.178	3049.34
A330102I10Rik	0.170163	0.0729072	0.149	0.117	2069.52
Tollip	0.133945	0.0728432	0.429	0.388	1694.95
Rtcb	0.539902	0.072818	0.494	0.505	3024.53
Nampt	0.106942	0.0728099	0.209	0.164	1430.14
Gm2a	0.229878	0.0727846	0.126	0.1	2555.09
Nell1	0.873523	0.0727704	0.369	0.416	1490.23
Mrps9	0.272187	0.0727517	0.197	0.171	2673.42
Pop7	0.521638	0.0726893	0.226	0.221	3006.72
Tmem121	0.536313	0.0726863	0.26	0.253	3019.98
Pcdh18	0.0954219	0.0726802	0.094	0.06	1295.16
U2af2	0.507662	0.0726626	0.417	0.427	3017.54
Fyn	0.502801	0.0726044	0.386	0.381	3039.43
Usp46	0.950895	0.0724549	0.36	0.409	481.153
Cipc	0.10501	0.0724483	0.289	0.238	1407.66
Senp3	0.39768	0.0723288	0.22	0.203	3039.86
Tm2d3	0.305258	0.0723164	0.249	0.224	2872.79
Cfdp1	0.232369	0.072286	0.52	0.512	2574.18
Gm14295	0.0203503	0.0722672	0.171	0.107	308.266
Cox6b1	0.0498881	0.0722479	0.851	0.851	720.135
Alyref	0.0858842	0.0721603	0.134	0.093	1175.93
Trmt10a	0.368965	0.0721356	0.149	0.128	3174.57
Man2b1	0.259719	0.072085	0.209	0.181	2781.59
Eid1	0.185284	0.072075	0.883	0.907	2205.07
Hmx3	0.164106	0.0720141	0.126	0.093	2012.93
Derl1	0.340209	0.0719921	0.446	0.434	3048.95
Msl3l2	0.297552	0.0719781	0.143	0.117	2827.04
Chp1	0.201796	0.0719621	0.657	0.641	2357.99
Actr5	0.103917	0.0719368	0.114	0.078	1395.5
Gpc6	0.22991	0.0718877	0.091	0.068	2554.99
Apmap	0.290279	0.0718135	0.209	0.185	2775.07
Asb8	0.355064	0.0717869	0.209	0.192	3096.16
Map4k2	0.395315	0.0717725	0.283	0.274	3033.64
Rgs7bp	0.160981	0.0717443	0.246	0.206	1978.93
Chmp6	0.229084	0.0717317	0.186	0.157	2548.56
Sar1b	0.474454	0.0717256	0.266	0.256	3109.57
Cdc25a	0.186255	0.0716221	0.134	0.103	2213.64
Syce2	0.163866	0.0715977	0.143	0.11	2010.48
Prpf8	0.285909	0.0715432	0.274	0.26	2749.01
Amz2	0.223523	0.0714619	0.306	0.274	2502.12
Uckl1	0.367586	0.071383	0.097	0.078	3166.76
Ldb1	0.165413	0.0712996	0.24	0.203	2024.49
Gm2061	0.0509163	0.0712942	0.06	0.028	734.264
Rpl10	0.014907	0.071283	0.997	1	227.898
Cdc37	0.632612	0.0712039	0.337	0.345	2948.6
Pxylp1	0.238272	0.0710486	0.169	0.142	2623.14
Ccdc65	0.251106	0.0709714	0.077	0.057	2718.98
Kcnq5	0.0679276	0.0708812	0.134	0.089	954.179
Baz1b	0.779727	0.070854	0.466	0.505	2254.19
Ube2n	0.164984	0.0708399	0.68	0.658	2020.56
P2rx2	0.00280821	0.0707971	0.04	0.004	44.1225
Ywhae	0.0667773	0.0706773	0.96	0.961	939.557
Smarcb1	0.463699	0.0706515	0.171	0.157	3096.58
Gfra2	0.0718494	0.0705502	0.203	0.146	1003.74
Arsb	0.234992	0.0705328	0.349	0.32	2596.66
Dbp	0.638307	0.0704461	0.32	0.317	2935.57
Lias	0.314016	0.0704028	0.303	0.281	2922.23
Pcdh8	0.140197	0.070362	0.211	0.171	1760.31
Agbl4	0.0782016	0.0703484	0.091	0.057	1082.78
Cbr1	0.472534	0.0702485	0.217	0.21	3108.33
Tceal5	0.558168	0.0701841	0.389	0.413	3026.39
Rab8b	0.376122	0.0701653	0.329	0.32	2968.73
Tarsl2	0.0748427	0.0701589	0.189	0.135	1040.46
Mlh3	0.125621	0.0701263	0.137	0.1	1604.05
Mia2	0.108596	0.0701139	0.171	0.128	1448.67
Prkag2	0.570583	0.0701022	0.191	0.185	3021.81
Stx1a	0.600604	0.070085	0.217	0.21	2963.98
Trnt1	0.487807	0.0700502	0.291	0.295	3100.01
Rab1b	0.419809	0.0700001	0.397	0.384	3121.7
Man2a2	0.404296	0.0699689	0.423	0.42	3064.16
Mcrip1	0.503503	0.0699679	0.557	0.562	3038.64
Cenpv	0.0799235	0.0699186	0.22	0.164	1103.98
Tmem179	0.291544	0.069886	0.689	0.712	2784.83
Kif21b	0.0690452	0.0698486	0.209	0.16	968.635
Cdk5	0.352307	0.0696588	0.397	0.381	3086.91
Wdr77	0.758196	0.0696336	0.269	0.278	2396.66
Mpv17l	0.302413	0.0696321	0.326	0.299	2856.29
Aff3	0.430315	0.0696235	0.191	0.174	3129.25
4930402H24Rik	0.40321	0.0695949	0.614	0.619	3060.77
Zc3h7a	0.175048	0.06956	0.217	0.181	2114.41
Lsm1	0.3737	0.0695269	0.314	0.299	2957.83
Tnpo1	0.345479	0.0695104	0.297	0.281	3065.78
2310033P09Rik	0.520267	0.0694259	0.274	0.26	3009.23
Dmrtc1a	0.245771	0.0693938	0.117	0.093	2677.18
Fbxw17	0.293061	0.0693717	0.114	0.093	2794.93
BC005537	0.232777	0.0691961	0.577	0.58	2578.23
Ewsr1	0.424845	0.0691695	0.64	0.687	3135.36
2610020C07Rik	0.045189	0.0690128	0.077	0.039	655.963
Ccdc92	0.201476	0.068869	0.531	0.516	2355.06
Carf	0.49935	0.0688413	0.283	0.274	3056.02
Ntm	0.411691	0.0687736	0.626	0.665	3092.62
Pisd	0.338975	0.0687727	0.309	0.288	3043.32
Galnt11	0.467404	0.0687024	0.22	0.21	3100.29
Acot13	0.51349	0.0686714	0.317	0.317	3009.05
Sfxn5	0.310998	0.0685579	0.18	0.153	2904.41
Bcl2l1	0.585884	0.0683615	0.369	0.374	2966.92
BC037034	0.25799	0.0683495	0.206	0.178	2768.49
Mcat	0.118133	0.0683331	0.1	0.068	1529.7
Dnttip1	0.303307	0.0683135	0.263	0.242	2861.4
Kpna3	0.182219	0.0682662	0.537	0.523	2178.79
Dlx1	0.20535	0.0682635	0.791	0.801	2391.09
Jrkl	0.160664	0.0682451	0.129	0.096	1975.68
Sp4	0.229936	0.0682031	0.211	0.185	2555.05
St6galnac5	0.57998	0.0680913	0.174	0.167	2982.84
Unc80	0.559889	0.0680759	0.777	0.801	3026.2
Adam8	0.0227087	0.0680599	0.051	0.018	342.652
Tceal3	0.485925	0.068058	0.643	0.644	3113.32
Got2	0.375874	0.0680512	0.603	0.623	2967.53
2310061I04Rik	0.961678	0.0680406	0.331	0.356	363.514
Nelfb	0.155033	0.068013	0.249	0.206	1914.96
Aimp1	0.268368	0.0679708	0.586	0.609	2650.94
Sept8	0.815525	0.0679486	0.429	0.441	2027.4
Tab2	0.144181	0.0679228	0.383	0.349	1803.42
Zbtb6	0.175046	0.0678836	0.14	0.107	2114.56
Scn5a	0.237127	0.0677111	0.16	0.132	2613.37
Itih5	0.0206839	0.0677072	0.034	0.007	313.237
0610010K14Rik	0.0502952	0.0676951	0.109	0.064	725.76
Anks1	0.539542	0.0676571	0.106	0.096	3024.67
Scg5	0.116853	0.0676536	0.58	0.544	1515.12
Camkk1	0.329506	0.0676115	0.314	0.295	3000.15
Psme2	0.465346	0.0675672	0.329	0.32	3096.41
1700019D03Rik	0.289777	0.0675407	0.134	0.11	2772.29
Dlx5	0.327379	0.0675266	0.163	0.142	2990.28
Hbegf	0.17229	0.0675124	0.12	0.089	2089.02
Dut	0.642886	0.0674989	0.269	0.267	2929.63
Rps16	0.00188086	0.0674801	0.997	1	29.648
Srpk2	0.516327	0.0674615	0.834	0.826	3009.15
Trmt12	0.0710388	0.0674591	0.071	0.039	994.045
Hnrnpd	0.14524	0.0673917	0.617	0.605	1814.34
Ogfod2	0.142793	0.0673909	0.154	0.117	1788.91
Zfp846	0.478798	0.0673761	0.526	0.562	3120.33
Prtn3	0.0741245	0.0672751	0.08	0.046	1031.29
Srrm4	0.288997	0.0672585	0.309	0.281	2768.88
Nsmf	0.189937	0.0672454	0.251	0.217	2247.53
Mxd4	0.399971	0.0672371	0.3	0.288	3050.58
Bcl9	0.458546	0.067222	0.583	0.587	3086.02
Sys1	0.288922	0.0672101	0.503	0.473	2768.74
Tmem158	0.724861	0.0671734	0.657	0.712	2544.99
Haus2	0.44877	0.0670752	0.209	0.196	3061.96
Vps52	0.0871283	0.0670438	0.16	0.114	1191.48
Nop10	0.236934	0.0670264	0.714	0.673	2611.96
Magi2	0.651564	0.0670083	0.4	0.42	2909.23
Cdkn2aipnl	0.23608	0.0669985	0.303	0.26	2605.38
Armcx2	0.849446	0.066972	0.354	0.374	1625.84
Hectd2	0.10219	0.0668711	0.086	0.053	1375.07
Pde4dip	0.44603	0.0668446	0.363	0.352	3055.75
Hdhd2	0.539249	0.0668238	0.354	0.367	3023.57
Chrm2	0.0910682	0.0668066	0.069	0.039	1240.89
Ndufb11	0.197046	0.0668022	0.626	0.609	2315.88
Akirin2	0.465272	0.0665595	0.323	0.306	3096.85
Ten1	0.213269	0.0665484	0.266	0.235	2427.65
Olfr655	0.391243	0.0665235	0.014	0.007	3023.91
Tor1a	0.324393	0.0664811	0.191	0.167	2975.66
Fem1c	0.16867	0.0664769	0.337	0.306	2055.41
Cops8	0.236646	0.0664745	0.531	0.537	2609.96
Nap1l3	0.443101	0.0664716	0.509	0.523	3046.77
Klf6	0.35343	0.0664265	0.197	0.174	3089.33
Rpap1	0.182703	0.0663918	0.083	0.057	2182.76
Lurap1l	0.329745	0.0663853	0.123	0.103	3001.01
Fam219b	0.184798	0.0663791	0.18	0.146	2200.39
Mrps18a	0.490564	0.0663095	0.357	0.363	3086.63
Hsbp1	0.447049	0.0662455	0.757	0.804	3060.5
Bicd1	0.347998	0.066226	0.677	0.676	3073.17
Ppp4c	0.439077	0.0661753	0.223	0.206	3101.64
Rgs6	0.0522456	0.0661212	0.089	0.05	752.233
Rfx1	0.517224	0.0661037	0.149	0.139	3008.69
Akap12	0.507048	0.0661028	0.14	0.128	3018.45
Skiv2l	0.176856	0.0660926	0.134	0.103	2132.88
Secisbp2l	0.332576	0.0660792	0.309	0.288	3014.8
Zc3hav1l	0.0680332	0.0659684	0.1	0.06	955.526
Bag5	0.178853	0.0659615	0.214	0.174	2149.99
Atg10	0.391273	0.0659539	0.137	0.117	3023.37
Zfp462	0.58402	0.0659481	0.62	0.637	2967.41
Carm1	0.145167	0.0658821	0.203	0.164	1813.86
Lrrc8b	0.385918	0.0658675	0.149	0.128	3006.3
Tmem47	0.464494	0.0658355	0.414	0.413	3096.32
Tbcc	0.173868	0.0657968	0.111	0.082	2104.5
Cntnap2	0.324699	0.0657595	0.706	0.708	2976.84
Gar1	0.139893	0.0657408	0.343	0.299	1757.33
Rad1	0.0412255	0.0656965	0.077	0.039	602.553
Atf4	0.598301	0.0656557	0.497	0.512	2967.57
Kpna4	0.552741	0.0656347	0.389	0.399	3030.12
Ifngr2	0.585637	0.0656265	0.2	0.196	2969.76
Coq4	0.67618	0.0655947	0.126	0.121	2860.24
Gabrg3	0.18016	0.0655756	0.569	0.544	2161.56
Txnl4a	0.326925	0.0654784	0.243	0.217	2988.75
Fbxl5	0.311898	0.0654335	0.351	0.327	2908.76
Zfp942	0.147245	0.0653402	0.174	0.135	1836.45
Trabd	0.155986	0.0653108	0.171	0.132	1925.8
Mrps31	0.474422	0.0652861	0.1	0.089	3110.31
Asf1a	0.192035	0.0652287	0.111	0.082	2268.51
Cc2d1a	0.48832	0.0652248	0.174	0.164	3100.35
Ccl27a	0.406411	0.0651687	0.489	0.491	3072.88
Map1lc3a	0.147009	0.0651656	0.837	0.84	1833.93
Rgs19	0.162299	0.0651156	0.206	0.167	1993.19
Serbp1	0.172224	0.0651085	0.854	0.833	2088.91
Atp13a3	0.650778	0.0650971	0.3	0.313	2909.63
2010111I01Rik	0.141146	0.0650659	0.103	0.071	1770.4
Gipc1	0.277244	0.0650084	0.111	0.089	2695.09
Pin1	0.766322	0.0649985	0.411	0.438	2315.83
Stk25	0.500843	0.0649917	0.566	0.566	3051.14
Ndrg2	0.464771	0.0649823	0.206	0.192	3096.31
Rpgrip1l	0.0982718	0.0649758	0.166	0.121	1329.52
Vdac2	0.409679	0.0649465	0.537	0.541	3085.7
Morf4l1	0.144753	0.0648859	0.997	0.989	1809.56
Gpr83	0.436546	0.0648625	0.097	0.082	3113.45
Ext1	0.311035	0.0648491	0.103	0.082	2904.45
Emc3	0.37752	0.0648244	0.34	0.327	2971.08
AC165953.2	0.319642	0.0648138	0.243	0.217	2954.13
Ddt	0.273347	0.0647979	0.151	0.125	2677.16
Tspan2	0.349373	0.0646734	0.371	0.349	3077.63
Rrn3	0.348365	0.0646115	0.354	0.335	3074.67
Scg3	0.361625	0.064581	0.486	0.491	3134.93
Mbd1	0.376543	0.0645742	0.226	0.206	2969.04
Mrpl42	0.12002	0.0645589	0.503	0.47	1551.5
Mpg	0.305418	0.0645483	0.211	0.189	2873.98
Rnf217	0.89322	0.0645459	0.157	0.164	985.222
Smg7	0.144305	0.064544	0.3	0.267	1804.68
Zdhhc23	0.473519	0.0645239	0.083	0.071	3111.02
Vgll4	0.0110099	0.0645183	0.063	0.021	169.596
Dab2ip	0.491412	0.0644938	0.297	0.288	3079.19
Rnf216	0.501909	0.0644603	0.194	0.181	3045.08
Mettl14	0.221661	0.0644445	0.1	0.075	2486.15
Tmem108	0.7322	0.0643472	0.437	0.463	2517.3
Pacs1	0.412078	0.064346	0.26	0.242	3094.29
Ahcyl2	0.660928	0.0643319	0.389	0.416	2888.26
Dctpp1	0.307249	0.0642665	0.129	0.107	2883.84
Id2	0.322693	0.0642183	0.106	0.085	2968.13
Zfp771	0.250273	0.0642173	0.237	0.206	2711.71
Nxph1	0.187781	0.0641349	0.114	0.085	2227.08
Arl2	0.566783	0.0641312	0.274	0.274	3024.92
Cntrl	0.0199698	0.064108	0.069	0.028	302.862
Phb2	0.529568	0.0640625	0.377	0.374	3009.54
Rbx1	0.542073	0.0640362	0.794	0.794	3024.77
Scarb2	0.535506	0.063984	0.406	0.406	3018.65
Rex1bd	0.263984	0.0639392	0.62	0.612	2814.87
Gm9844	0.612177	0.0639232	0.166	0.16	2959.26
Strip2	0.228643	0.0638591	0.1	0.075	2545.25
Fam204a	0.984431	0.0638558	0.411	0.445	158.493
Rab9b	0.368985	0.063809	0.629	0.644	3174.38
Cox5b	0.220917	0.063763	0.834	0.833	2486.42
Slc7a5	0.233645	0.0637532	0.106	0.082	2585.29
Stxbp6	0.504487	0.0637331	0.08	0.068	3032.47
5730409E04Rik	0.186168	0.0636547	0.286	0.249	2212.98
Pcdh15	0.414937	0.063608	0.326	0.306	3105.8
Mcu	0.209651	0.0636047	0.14	0.11	2393.58
Adgrl2	0.47362	0.063601	0.214	0.203	3110.26
Ascc1	0.651974	0.0635952	0.16	0.157	2907.81
Lrp8os2	0.0631777	0.0635928	0.069	0.036	892.827
Tada3	0.103676	0.0635906	0.137	0.096	1392.58
Lrrc75b	0.189134	0.0635558	0.209	0.174	2239.91
Tsc22d2	0.476077	0.0635364	0.223	0.214	3112.12
9130401M01Rik	0.32125	0.0634947	0.186	0.16	2961.28
Kcnc3	0.368112	0.063493	0.143	0.125	3168.71
Eif4b	0.240074	0.0634858	0.666	0.669	2637.22
Adarb1	0.256824	0.0634223	0.334	0.306	2759.32
Nsa2	0.599704	0.0634146	0.614	0.651	2963.14
Mthfs	0.0430589	0.0633791	0.077	0.039	627.54
Llph	0.224416	0.0633763	0.326	0.295	2508.52
Ensa	0.45447	0.0633581	0.609	0.662	3075.4
Sptbn2	0.122941	0.0633498	0.237	0.192	1574.14
Snrpb2	0.708275	0.0633402	0.411	0.438	2612.12
Ndufaf6	0.293503	0.0633157	0.111	0.089	2797.67
Scai	0.268085	0.0632567	0.529	0.53	2649.76
0610040B10Rik	0.313385	0.0632411	0.169	0.146	2917.61
Fbxo10	0.433058	0.0631662	0.443	0.441	3111.52
Zfp605	0.14585	0.0631524	0.069	0.043	1820.93
Farsa	0.444349	0.0631002	0.191	0.178	3050.01
Wdr83	0.497725	0.0630941	0.177	0.167	3061.51
Cep57l1	0.559081	0.0630928	0.091	0.082	3025.19
Mak16	0.390056	0.0630903	0.18	0.164	3017.86
Nell2	0.519264	0.0630773	0.386	0.391	3011.21
Ttc8	0.542152	0.0630764	0.349	0.335	3024.12
Fnbp1l	0.424256	0.0630478	0.64	0.655	3133.98
Sbf2	0.565231	0.0630054	0.36	0.367	3023.98
Krt77	0.183742	0.0630012	0.123	0.093	2191.49
Serf2	0.40283	0.0629906	0.931	0.907	3060.71
Spryd3	0.48847	0.0629627	0.526	0.523	3100.81
Arhgap23	0.794962	0.0629581	0.249	0.256	2135.27
Kcnh7	0.662007	0.0629037	0.217	0.21	2883.7
Klf15	0.0953528	0.0628676	0.086	0.053	1294.32
Syncrip	0.22568	0.0628266	0.386	0.352	2519.72
Lingo1	0.726921	0.0627828	0.283	0.292	2535.5
Thumpd3	0.428443	0.0626925	0.137	0.121	3141.34
Wdr18	0.604999	0.0626902	0.326	0.335	2957.84
Luzp2	0.549036	0.0626713	0.38	0.381	3028.48
Uspl1	0.312668	0.062657	0.177	0.153	2912.81
Slc35a2	0.258506	0.0626257	0.183	0.157	2771.45
Strn	0.311377	0.0625922	0.211	0.189	2905.46
1700037H04Rik	0.504695	0.0625733	0.434	0.441	3032.71
Cdh15	0.126227	0.062512	0.1	0.068	1610.78
Rangrf	0.178418	0.0624978	0.049	0.028	2145.66
1810030O07Rik	0.761345	0.0624348	0.194	0.196	2366.26
Msh3	0.37414	0.0624288	0.163	0.142	2960.57
Atpif1	0.253893	0.0623335	0.94	0.957	2740.02
Thap12	0.521406	0.0623273	0.22	0.21	3006.43
Sgk1	0.0547311	0.062324	0.08	0.043	782.216
Trp53i13	0.0351652	0.0622735	0.069	0.032	518.969
Micall1	0.225665	0.062266	0.16	0.128	2519.78
Vps54	0.254612	0.0622339	0.106	0.082	2744.21
Dalrd3	0.994884	0.0622281	0.343	0.374	50.7391
Mtx2	0.672691	0.0622222	0.183	0.185	2873.06
Cdc27	0.575881	0.0622054	0.294	0.292	3005.52
Slc30a9	0.327307	0.0621718	0.663	0.701	2989.95
Grm4	0.0215277	0.0621391	0.051	0.018	325.649
Cntln	0.356126	0.0621382	0.151	0.128	3099.01
Ldah	0.808431	0.0620891	0.177	0.178	2067.97
Prmt6	0.275743	0.0620438	0.154	0.132	2687.67
Hdhd3	0.0316952	0.061987	0.031	0.007	470.483
Syt10	0.0435844	0.0619822	0.057	0.025	634.677
Rhov	0.386889	0.0619752	0.169	0.149	3007.29
Tbpl1	0.46817	0.0619732	0.349	0.352	3100.69
Hmg20a	0.600672	0.0618015	0.426	0.434	2963.72
Ndufv1	0.419184	0.0617596	0.249	0.231	3119.15
Phf23	0.423441	0.0617313	0.24	0.224	3133.04
Pgf	0.354372	0.0617313	0.109	0.089	3092.61
Gemin7	0.386617	0.0617168	0.351	0.338	3006.33
Camk1d	0.140092	0.061682	0.086	0.057	1759.27
Faf1	0.316636	0.0616189	0.177	0.149	2940.92
Tle3	0.1294	0.0615697	0.1	0.068	1644.8
Tmem44	0.0308195	0.0615368	0.06	0.025	458.008
Frmpd3	0.345888	0.0614971	0.36	0.345	3067.68
Dtx3	0.510272	0.0614926	0.531	0.541	3009.59
Kbtbd4	0.146696	0.0614641	0.169	0.128	1830.76
Snrpn	0.149965	0.061462	0.974	0.975	1864.51
Orc4	0.532571	0.0614486	0.26	0.249	3013.82
Copa	0.350592	0.0614417	0.554	0.559	3082.05
Sox2	0.914518	0.0614268	0.391	0.399	819.408
Slc5a3	0.563079	0.0614243	0.369	0.374	3023.73
E130307A14Rik	0.418721	0.0614169	0.246	0.231	3116.96
Mfsd4b4	0.0405464	0.061396	0.057	0.025	593.315
Tbce	0.128485	0.0613804	0.337	0.288	1634.97
Lrfn3	0.075869	0.0613715	0.057	0.028	1052.91
Cdhr1	0.0800092	0.0613518	0.051	0.025	1105.01
Mafb	0.0229817	0.061343	0.046	0.014	346.564
Zfp3	0.0656077	0.0613345	0.069	0.036	924.938
Siah1a	0.407044	0.0612533	0.154	0.139	3074.81
Zdhhc3	0.164136	0.0612279	0.22	0.178	2013.12
Ythdf2	0.272153	0.0612114	0.42	0.388	2673.36
Dnajc30	0.394002	0.0611899	0.26	0.249	3027.12
Katnbl1	0.645247	0.0611516	0.209	0.203	2922.32
Fundc2	0.112605	0.0611119	0.371	0.331	1491.22
Mettl2	0.440794	0.0611035	0.171	0.157	3105.4
Tsen34	0.278806	0.0610904	0.323	0.299	2698.84
Cbx8	0.083575	0.0610678	0.08	0.046	1147.57
Tbc1d15	0.383977	0.0610634	0.169	0.146	2996.94
Edf1	0.731754	0.0610438	0.474	0.512	2526.02
Dgcr6	0.473948	0.0610066	0.434	0.441	3110.52
Clk2	0.0602172	0.0609972	0.111	0.068	853.879
Bmpr1a	0.251834	0.0609916	0.251	0.221	2724.34
Txndc17	0.341607	0.0609737	0.534	0.516	3051.24
Slc6a17	0.128167	0.0609724	0.669	0.687	1631.56
Clpx	0.108363	0.0609703	0.16	0.117	1446.43
Hpca	0.825298	0.0609486	0.363	0.395	1948.53
Gabrb3	0.393858	0.0609391	0.714	0.712	3030.34
Mpnd	0.440317	0.0608659	0.286	0.27	3104.23
Fbf1	0.75082	0.0608359	0.229	0.235	2442.42
Fam19a2	0.701903	0.0608328	0.217	0.214	2641.26
Ripor2	0.186114	0.0608324	0.186	0.146	2212.71
Nefh	0.442894	0.0607663	0.143	0.128	3086.53
Gm26881	0.0855361	0.0607145	0.123	0.082	1171.59
Btbd1	0.392031	0.0607024	0.409	0.391	3026.48
Nyap2	0.834881	0.0606634	0.183	0.206	1768.28
Pcdhb5	0.0177875	0.0606582	0.054	0.018	270.512
Tshz2	0.178887	0.0606387	0.771	0.733	2150.22
Gm14443	0.0506075	0.0605249	0.066	0.032	730.063
Twf2	0.0891704	0.0605132	0.097	0.06	1217.09
Ntsr1	0.0754199	0.060479	0.071	0.039	1047.36
A230087F16Rik	0.332679	0.0604357	0.137	0.114	3014.73
Leng8	0.867693	0.0604201	0.289	0.302	1524.54
Ccdc97	0.486125	0.0604028	0.191	0.178	3108.29
Sel1l3	0.0245582	0.0603927	0.063	0.025	369.355
Usp3	0.305729	0.0603889	0.08	0.06	2875.99
Ciart	0.167014	0.0603731	0.086	0.057	2039.57
Akap1	0.216071	0.0603728	0.14	0.11	2452.4
Taf15	0.367588	0.0603534	0.329	0.317	3166.4
Dlat	0.324781	0.0603402	0.363	0.349	2977.27
Snrpd1	0.842896	0.0603156	0.457	0.512	1673.99
D5Ertd579e	0.242675	0.0602542	0.397	0.363	2655.84
Ddx42	0.32564	0.0601635	0.511	0.498	2981.24
Bcl6	0.108955	0.0601631	0.106	0.071	1452.15
Nudt3	0.353748	0.0601345	0.689	0.715	3090.7
Taf13	0.302392	0.0601262	0.177	0.153	2856.7
Rcc1l	0.212214	0.0601167	0.097	0.071	2418.6
Pnck	0.268253	0.0600787	0.626	0.655	2650.6
Cux2	0.410148	0.0600733	0.14	0.121	3086.77
B230217O12Rik	0.334279	0.0600491	0.149	0.128	3022.55
Ctcf	0.2527	0.060032	0.411	0.391	2731.68
Adam11	0.426874	0.0600116	0.206	0.189	3141.36
Becn1	0.436532	0.0599831	0.477	0.466	3113.78
Kcnip2	0.282269	0.0599566	0.151	0.128	2723.62
Tex2	0.223734	0.0599332	0.383	0.349	2503.59
Insm2	0.520603	0.0598691	0.069	0.057	3009.61
Snx21	0.605295	0.0597885	0.466	0.488	2956.26
Serp1	0.868284	0.0597584	0.197	0.203	1520.36
Slc31a1	0.222775	0.0597434	0.091	0.068	2496.19
Dhx57	0.365517	0.0596762	0.189	0.171	3156.24
Scaf1	0.212419	0.0596255	0.12	0.093	2419.88
Selenok	0.223036	0.0595685	0.669	0.644	2498.44
Cox6a1	0.319131	0.0595474	0.751	0.758	2951.64
Lrtm2	0.36665	0.0595398	0.257	0.238	3161.26
Smim1	0.415502	0.0594965	0.217	0.199	3107.95
Rassf3	0.129742	0.0594864	0.083	0.053	1648.76
Sike1	0.524438	0.0594472	0.226	0.217	3009.23
Abhd14b	0.649086	0.0594226	0.186	0.185	2909.85
Smarcc2	0.11786	0.0593586	0.654	0.63	1526.87
Cox20	0.274939	0.059277	0.391	0.363	2684.23
Vps13c	0.477169	0.0592667	0.274	0.26	3115.91
Enpp5	0.278129	0.0592533	0.466	0.441	2698.41
mt-Nd6	0.359721	0.059234	0.166	0.146	3121.66
Cox7b	0.236	0.059225	0.703	0.722	2604.73
Wbp11	0.100126	0.0591422	0.654	0.623	1351.5
Pde8b	0.762358	0.0591155	0.294	0.313	2347.3
Fmnl2	0.559173	0.0590959	0.1	0.089	3024.57
Zfp800	0.296734	0.059034	0.166	0.139	2821.35
Kcnb1	0.274979	0.0589985	0.42	0.406	2684.34
Efna3	0.774107	0.0589288	0.169	0.171	2272.01
Golph3	0.56075	0.058887	0.454	0.47	3027.49
Dbt	0.416789	0.0588856	0.154	0.139	3115.08
Trmt1l	0.463453	0.0588731	0.429	0.441	3096.33
Arhgap33	0.413883	0.0588414	0.183	0.167	3102.05
Ndrg3	0.485409	0.058804	0.746	0.744	3112.93
Triqk	0.722141	0.0587819	0.123	0.117	2559.99
Ppat	0.402866	0.0587653	0.131	0.114	3060.57
Dapk3	0.255642	0.0586889	0.131	0.107	2751.22
Cox4i1	0.118078	0.0586667	0.994	0.996	1529.11
Zfyve16	0.733881	0.0586112	0.114	0.11	2506.94
Zfp787	0.399694	0.0585942	0.129	0.11	3049.27
Sgcz	0.351332	0.0585592	0.103	0.085	3084.69
Proser1	0.820633	0.0585204	0.257	0.274	1999.06
Tspan9	0.212705	0.0585051	0.094	0.068	2422.92
Atp5j	0.113358	0.058459	0.931	0.907	1500.52
Nmral1	0.317994	0.0584429	0.063	0.046	2948.44
Tmem94	0.436745	0.0584401	0.189	0.174	3114.43
Gopc	0.589105	0.0584091	0.266	0.256	2964.96
Def8	0.761926	0.0584082	0.123	0.121	2358.92
Trappc5	0.580342	0.0583942	0.18	0.171	2982.38
Coa6	0.380151	0.0583622	0.323	0.306	2981.9
Trp53rkb	0.206178	0.058327	0.069	0.046	2363
Rbbp8	0.169759	0.0583152	0.063	0.039	2065.79
Bhlhb9	0.638061	0.0583026	0.291	0.292	2935.72
Tmem163	0.110628	0.0582812	0.077	0.046	1468.7
Grm7	0.692306	0.0581916	0.42	0.42	2796.91
Snhg12	0.490744	0.0581858	0.717	0.694	3084.33
Poldip2	0.449633	0.0581796	0.334	0.327	3063.8
Rgs16	0.463602	0.0580725	0.174	0.157	3096.4
Mxra7	0.753857	0.0580483	0.18	0.178	2426.66
Ugdh	0.906352	0.0580095	0.306	0.331	885.506
Ilkap	0.870052	0.0580049	0.231	0.238	1511.28
Sra1	0.39449	0.0580025	0.369	0.363	3029.69
Tmem106c	0.987877	0.05798	0.231	0.256	120.521
Atp5g1	0.654522	0.0579478	0.771	0.776	2900.19
Eif3b	0.443978	0.057945	0.286	0.281	3049.69
Klhl1	0.25503	0.0579272	0.189	0.16	2746.67
Gm26722	0.175263	0.0579255	0.057	0.036	2116.82
Ptma	0.460806	0.0579103	0.966	0.968	3089.7
Igbp1	0.418473	0.0579087	0.206	0.189	3118.88
Zmym4	0.464017	0.057871	0.471	0.47	3095.46
Acyp2	0.489346	0.0578448	0.177	0.164	3099.03
Pbdc1	0.377121	0.0578186	0.206	0.185	2969.83
Porcn	0.27675	0.0577783	0.109	0.085	2692.78
Mapkapk2	0.0914929	0.0577722	0.069	0.039	1246.04
Sdk2	0.809988	0.0577605	0.286	0.295	2055.75
Gm15860	0.574452	0.0577381	0.106	0.096	3012.43
Zfp281	0.438897	0.0577304	0.291	0.274	3101.69
Etf1	0.456339	0.0577231	0.36	0.356	3079.83
1810043G02Rik	0.717659	0.0576818	0.297	0.299	2577.83
Elp3	0.561965	0.0575954	0.357	0.363	3027.31
Timm8a1	0.186878	0.0575681	0.094	0.068	2218.61
Lrp3	0.272498	0.0575621	0.294	0.26	2675.12
Ppme1	0.556114	0.057536	0.563	0.598	3030.26
Kdsr	0.871356	0.0575281	0.371	0.399	1497.86
Ppdpf	0.867608	0.0574667	0.46	0.509	1525.25
Mrpl27	0.383831	0.0574468	0.286	0.27	2996.95
Tcf4	0.421893	0.0574154	0.374	0.359	3127.49
Fbxo2	0.3924	0.0573462	0.234	0.217	3028.15
Prrg3	0.482167	0.0573278	0.374	0.381	3120.58
Pms2	0.600886	0.0572888	0.154	0.149	2962.97
Srsf9	0.377225	0.0572292	0.343	0.338	2970.27
3222401L13Rik	0.293117	0.0572227	0.08	0.06	2795.16
Itm2b	0.111467	0.0571988	0.769	0.794	1477.95
Hist3h2a	0.500898	0.0571912	0.149	0.135	3050.97
Srp19	0.750338	0.0571858	0.434	0.459	2442.35
Vps13b	0.349016	0.0571767	0.229	0.206	3075.53
Lppos	0.0847053	0.0571766	0.083	0.05	1161.56
Rbm7	0.718991	0.0571176	0.249	0.253	2570.39
Pcdh10	0.787115	0.0571168	0.654	0.701	2204.71
Ddx56	0.256616	0.0570571	0.094	0.071	2757.85
Bcam	0.132619	0.0570569	0.074	0.046	1680.41
Azin1	0.664029	0.0570551	0.337	0.345	2879.89
Pcif1	0.36181	0.0569824	0.374	0.359	3135.8
Setd1a	0.228189	0.0569655	0.231	0.199	2542.25
Usp2	0.225621	0.0569528	0.071	0.05	2519.74
Rpn2	0.416035	0.0569356	0.234	0.217	3111.11
C730034F03Rik	0.401814	0.056867	0.106	0.089	3057
Mrpl22	0.26448	0.0568399	0.089	0.068	2817.5
Carnmt1	0.193233	0.0568056	0.137	0.107	2279.57
Akt3	0.393681	0.0567802	0.243	0.221	3029.77
Arhgef17	0.660131	0.0566472	0.591	0.609	2888.07
Rpia	0.143476	0.0566397	0.18	0.139	1795.88
Atf5	0.0646632	0.0566196	0.097	0.057	912.527
Src	0.494344	0.056592	0.243	0.228	3076.3
Ndufa4	0.159838	0.0565588	0.763	0.762	1966.64
Tmed8	0.37697	0.0564965	0.434	0.416	2969.77
Mthfd1l	0.0337437	0.0564896	0.054	0.021	499.17
Tpm3	0.392964	0.0564851	0.574	0.552	3027.4
Rtn2	0.805104	0.0564824	0.289	0.292	2085.22
H1f0	0.981355	0.0564217	0.226	0.246	185.476
Dusp26	0.40624	0.0564027	0.671	0.683	3071.98
Rpp25l	0.430796	0.0563634	0.166	0.146	3115.09
Mycbp	0.60831	0.056304	0.163	0.157	2955.78
Cep89	0.32036	0.0563033	0.149	0.125	2956.92
Trim28	0.827587	0.0563033	0.214	0.224	1903.45
Sypl	0.345761	0.0562218	0.266	0.238	3067.24
Gm12802	0.301794	0.0561976	0.051	0.036	2853.16
Alas1	0.30242	0.0561965	0.12	0.096	2856.05
Slc20a1	0.531058	0.0561495	0.249	0.242	3012.16
Pkig	0.41454	0.0561429	0.74	0.733	3104.91
Cdh12	0.362662	0.0561391	0.18	0.16	3139.57
Hdac5	0.340173	0.0561086	0.2	0.178	3049.31
Pgap1	0.384406	0.0560346	0.709	0.705	2998.36
Cpsf1	0.137926	0.0560321	0.103	0.071	1735.38
Irs1	0.0916493	0.0560315	0.06	0.032	1247.62
Mast4	0.891721	0.0559807	0.389	0.416	1001.4
Car10	0.875728	0.0559765	0.337	0.352	1471.22
Sin3b	0.824905	0.0559503	0.371	0.384	1950.9
Ncoa4	0.420771	0.0558827	0.363	0.352	3122.97
Rpl13a	0.125977	0.0558768	0.974	0.989	1608.22
Celsr2	0.903618	0.0558551	0.406	0.434	904.522
Tm9sf2	0.634378	0.0558536	0.606	0.626	2941.61
Pcca	0.646976	0.0558219	0.137	0.132	2915.92
Glra1	0.152744	0.0557997	0.097	0.068	1891.27
Mpped2	0.241269	0.0557931	0.194	0.164	2645.99
Decr2	0.396289	0.055777	0.211	0.189	3036.37
Mgat1	0.234933	0.0557714	0.249	0.217	2596.25
Prelid1	0.361911	0.0557146	0.414	0.384	3135.96
Atp11b	0.545856	0.0557143	0.294	0.285	3028.41
Exoc5	0.674849	0.0557029	0.443	0.456	2865.41
4933434E20Rik	0.674639	0.0556474	0.56	0.598	2867.89
Fech	0.431881	0.0555758	0.217	0.196	3116.02
Ccdc177	0.498861	0.0555428	0.177	0.164	3059.01
Enoph1	0.390598	0.0555284	0.194	0.174	3020.89
1700066M21Rik	0.452193	0.0555096	0.12	0.107	3070.84
C530050E15Rik	0.0319798	0.0555015	0.031	0.007	474.421
Sgce	0.885918	0.055463	0.206	0.221	1041.84
Thrb	0.74035	0.0554613	0.186	0.189	2477.21
Wdr27	0.327489	0.0554476	0.117	0.096	2989.97
Ugp2	0.199246	0.0554148	0.183	0.149	2334.57
Lgi1	0.251474	0.0554115	0.306	0.267	2722.2
Vps8	0.162119	0.0553819	0.089	0.06	1991.14
Rnf214	0.744191	0.0553192	0.397	0.406	2461.78
Brap	0.525348	0.0552522	0.211	0.196	3006.57
Acvr1	0.100547	0.0552261	0.086	0.053	1356.48
Ilf2	0.652787	0.0551959	0.477	0.488	2901.64
Sdf2	0.195631	0.0551915	0.423	0.391	2302.97
Ppp2r2b	0.426979	0.0551845	0.5	0.509	3140.86
Rbak	0.0120761	0.055171	0.057	0.018	185.755
Nudcd1	0.485426	0.0551411	0.234	0.221	3112.55
Nipsnap1	0.417107	0.0551348	0.326	0.327	3116.21
Zfp119a	0.0112438	0.0551331	0.051	0.014	173.154
Nap1l1	0.122578	0.0551092	0.874	0.836	1570.1
Rpl9-ps6	0.524289	0.0551087	0.406	0.395	3010.47
4632415L05Rik	0.682523	0.0551078	0.22	0.21	2833.84
Rnf38	0.651333	0.0550964	0.163	0.157	2910.16
Mettl5	0.129217	0.0550871	0.106	0.071	1642.74
Nr3c2	0.0457775	0.0550605	0.051	0.021	664.002
Uhrf1bp1	0.138001	0.0550568	0.083	0.053	1736.05
Cct2	0.276317	0.0550445	0.617	0.623	2689.67
Hmgb2	0.0106899	0.0550282	0.031	0.004	164.764
Nhlrc2	0.151671	0.0550036	0.06	0.036	1881.18
Slc12a2	0.377806	0.0549896	0.206	0.185	2971.82
Pkib	0.243524	0.0549264	0.054	0.036	2662.44
Slc8a3	0.226462	0.0549175	0.149	0.117	2526.64
Prdx2	0.37855	0.0548476	0.609	0.658	2975.02
Rassf8	0.531141	0.0548432	0.351	0.345	3012.1
Hmga1	0.090871	0.0548387	0.083	0.05	1238.39
Polr2i	0.893109	0.0548201	0.363	0.391	985.992
Junb	0.0703498	0.0548194	0.069	0.036	985.32
Nme1	0.349939	0.0547824	0.723	0.751	3079.46
Pank1	0.382039	0.0547818	0.12	0.103	2990.22
Cant1	0.489099	0.054767	0.271	0.26	3099.42
Cct4	0.637202	0.0547556	0.486	0.512	2936.23
Daglb	0.346347	0.0547372	0.12	0.1	3067.94
Plppr5	0.215844	0.0547107	0.217	0.178	2451.34
Mrps6	0.285016	0.0547074	0.174	0.146	2743.28
Btbd10	0.566669	0.0546955	0.231	0.228	3025.44
AW209491	0.869371	0.0546729	0.26	0.27	1516.18
Abi1	0.741883	0.054641	0.331	0.335	2471.21
Ptges2	0.208217	0.0545787	0.22	0.181	2380.54
Atp5h	0.196908	0.0544673	0.851	0.851	2315.05
Slc33a1	0.324018	0.0543712	0.157	0.135	2974.16
Sprn	0.206526	0.0543584	0.186	0.153	2365.75
Tmem33	0.920823	0.0543133	0.343	0.37	767.046
Nedd8	0.349885	0.0542632	0.831	0.833	3079.34
Sumo3	0.598746	0.0542553	0.631	0.662	2967.39
Fkbp15	0.33975	0.0542066	0.106	0.085	3046.54
Msi1	0.452265	0.0541382	0.209	0.192	3070.42
Ino80e	0.753305	0.054124	0.211	0.214	2430.91
Klhdc4	0.202462	0.0541122	0.086	0.06	2363.55
1700008O03Rik	0.0611511	0.0540701	0.054	0.025	866.083
Slc3a2	0.675417	0.0540672	0.234	0.238	2863.09
Kctd2	0.43133	0.0540215	0.266	0.249	3116.36
Trim8	0.326361	0.0540154	0.26	0.231	2984.24
Mnat1	0.550826	0.0540138	0.163	0.153	3028.44
Cacng5	0.336243	0.0539688	0.166	0.142	3031.57
Wsb1	0.120236	0.053948	0.517	0.48	1553.81
Psmb10	0.201885	0.0539392	0.403	0.37	2358.22
Smim27	0.278633	0.0539292	0.109	0.085	2697.45
Champ1	0.442855	0.05392	0.214	0.199	3087.14
Vipas39	0.239103	0.0539083	0.246	0.21	2629.42
Atg5	0.548426	0.0539067	0.191	0.181	3028.41
Terf2	0.251526	0.0539067	0.32	0.288	2722.52
Vps4a	0.626954	0.0538727	0.346	0.342	2952.33
Zfp763	0.198468	0.0538684	0.123	0.093	2326.83
Parp1	0.985695	0.053813	0.149	0.157	141.94
B230217C12Rik	0.675109	0.053783	0.417	0.441	2863.81
Khsrp	0.416297	0.0537196	0.206	0.189	3111.82
Zfp87	0.0886445	0.0537131	0.089	0.053	1210.44
Dpp8	0.503132	0.0536519	0.194	0.185	3039.42
Sap18	0.864593	0.0535372	0.389	0.413	1538.97
Pbx1	0.462272	0.0535261	0.671	0.705	3093.98
Ndrg1	0.657519	0.0535133	0.337	0.349	2896.37
Osbpl8	0.278042	0.0534948	0.46	0.445	2698.12
Bbip1	0.471359	0.0534809	0.349	0.349	3108.62
Grwd1	0.0913277	0.0534527	0.106	0.068	1244.07
Hras	0.643911	0.0534518	0.66	0.683	2927.22
Zswim9	0.386207	0.0534405	0.157	0.139	3005.85
Pou6f1	0.637601	0.0533891	0.154	0.146	2936.79
Tekt5	0.489369	0.05337	0.069	0.057	3098.69
Cd3eap	0.702249	0.0533692	0.22	0.214	2639.05
Rsph9	0.195001	0.0533645	0.151	0.117	2297.69
Cyc1	0.617511	0.0533593	0.4	0.402	2955.41
Arhgap18	0.837545	0.0533281	0.129	0.139	1736.23
Prr7	0.573785	0.0533219	0.229	0.221	3011.23
Polr3c	0.171644	0.0533159	0.123	0.089	2084.1
Tcp1	0.403732	0.0532765	0.797	0.79	3062.31
Dppa5a	0.0633978	0.0532204	0.083	0.046	895.684
B3galt6	0.178458	0.0532069	0.194	0.157	2145.96
Usp30	0.275243	0.0531922	0.2	0.171	2683.89
Slc39a10	0.880881	0.0531815	0.46	0.48	1094.94
Btbd2	0.438211	0.0531789	0.269	0.249	3117.87
Hsp90ab1	0.0609035	0.0531252	0.997	0.993	862.88
Gm44644	0.415237	0.0531177	0.803	0.811	3106.8
Gm48855	0.511661	0.0531056	0.123	0.11	3010.1
Zfand5	0.635394	0.053098	0.551	0.584	2941.87
B430010I23Rik	0.363742	0.0530698	0.1	0.082	3146
Rasgrf2	0.767663	0.0530478	0.557	0.609	2305.29
Abcg1	0.322253	0.0530472	0.269	0.242	2965.7
Fstl1	0.341082	0.0529985	0.157	0.135	3050.29
Dusp8	0.318752	0.0529797	0.494	0.484	2950.37
Tbl1xr1	0.631212	0.0529617	0.186	0.181	2949.02
Cotl1	0.828313	0.0529532	0.334	0.352	1897.66
AC129328.1	0.0240478	0.0529448	0.046	0.014	362.039
Arhgdia	0.746408	0.0528944	0.643	0.658	2459.41
Map3k5	0.227876	0.0528667	0.203	0.171	2539.45
Etfrf1	0.475789	0.0528585	0.223	0.21	3112.13
Git2	0.643652	0.0528358	0.369	0.377	2927.97
Gmip	0.186056	0.052716	0.131	0.1	2212.39
Dhx9	0.71441	0.0527102	0.334	0.356	2584.02
Uggt2	0.42062	0.0526657	0.171	0.153	3123.1
Dctn5	0.529576	0.0526521	0.377	0.388	3009.05
Cenpb	0.713407	0.0526498	0.14	0.135	2592.52
Ppil2	0.755321	0.0526403	0.254	0.26	2413.25
C130073E24Rik	0.877085	0.0526277	0.354	0.359	1332.29
Csmd2	0.285596	0.0525105	0.26	0.228	2746.58
Ctdsp1	0.0350482	0.0524588	0.049	0.018	517.312
Pex6	0.350001	0.0524512	0.154	0.132	3079.31
Mapk1ip1	0.469635	0.0524388	0.231	0.214	3105.23
Ccne1	0.519852	0.0523884	0.094	0.082	3009.42
Zfp28	0.576106	0.0523853	0.077	0.068	3005.54
Unc119b	0.339696	0.0523604	0.103	0.082	3046.4
Kif26b	0.969713	0.0523385	0.149	0.157	292.853
Sgtb	0.319449	0.0523142	0.114	0.093	2952.67
Bcl2l13	0.479975	0.0522689	0.126	0.11	3120.79
Nipa2	0.352026	0.0522389	0.174	0.153	3087.26
Mdga2	0.386566	0.0522324	0.477	0.484	3006.32
Snx32	0.714775	0.0521957	0.297	0.306	2580.34
Rps27rt	0.311651	0.0521595	0.917	0.915	2906.77
Adsl	0.222226	0.0521096	0.149	0.117	2491.16
Fzd3	0.805117	0.0521072	0.449	0.488	2083.64
Elmod2	0.446896	0.0520896	0.14	0.125	3059.9
Zfp597	0.526503	0.0520672	0.171	0.16	3008.96
C030006K11Rik	0.108781	0.0520101	0.077	0.046	1450.7
Eefsec	0.41228	0.0519418	0.2	0.174	3094.58
Lcmt1	0.38716	0.051936	0.363	0.345	3008.24
Wbp1l	0.133296	0.0519102	0.091	0.06	1687.93
Chic2	0.680194	0.0518825	0.3	0.299	2840.49
Snx9	0.247186	0.0518735	0.063	0.043	2687.16
Synrg	0.721353	0.0518702	0.503	0.534	2563.69
Ndufb2	0.158109	0.0518582	0.697	0.698	1948.69
Atxn7l2	0.152631	0.0518511	0.069	0.043	1890.33
Cln3	0.229678	0.051778	0.1	0.075	2553.1
Pmm1	0.316463	0.0517652	0.566	0.562	2939.94
Tle2	0.459794	0.0517495	0.134	0.117	3087.52
Ubash3b	0.448494	0.0517247	0.2	0.185	3062.77
Kat8	0.355633	0.0516583	0.097	0.078	3097.92
Bend5	0.509135	0.051557	0.123	0.11	3013.57
Coa3	0.699346	0.0515561	0.694	0.726	2670.8
Qtrt1	0.497529	0.051471	0.166	0.153	3067.27
Ptk2b	0.19053	0.0514405	0.057	0.036	2253.21
Mrpl1	0.349341	0.0514308	0.14	0.117	3077.69
Gdi2	0.278605	0.0514302	0.694	0.708	2697.45
R3hdm2	0.820686	0.051398	0.306	0.317	1998.37
Chtf8	0.134997	0.0513836	0.137	0.1	1706.37
Tceal9	0.188164	0.0513752	0.866	0.865	2230.69
Ablim3	0.230726	0.0513643	0.223	0.189	2560.82
Arpc3	0.520186	0.0513621	0.449	0.445	3009.27
Asic1	0.587804	0.0513601	0.251	0.295	2966.06
Gtf2e1	0.0982896	0.0513293	0.091	0.057	1329.56
Rab11fip2	0.382851	0.0512482	0.771	0.769	2992.36
Thra	0.159058	0.0512148	0.937	0.922	1958.64
Ankrd34b	0.954077	0.0511924	0.383	0.42	454.14
Nrcam	0.264999	0.0511881	0.369	0.335	2821.71
Lrrtm2	0.464101	0.0511185	0.374	0.374	3095.09
Clta	0.292168	0.0511051	0.823	0.819	2788.16
Diras2	0.207755	0.0510735	0.146	0.114	2376.3
Prpf4	0.322387	0.0510439	0.103	0.082	2966.29
Nap1l5	0.0319117	0.0510333	1	1	473.505
Lrfn4	0.473925	0.0510142	0.171	0.157	3110.84
Rab13	0.191099	0.0510006	0.103	0.075	2258.98
Col9a3	0.113852	0.0509592	0.049	0.025	1506.83
Riok1	0.63508	0.0509319	0.326	0.331	2941.69
Hbs1l	0.299008	0.0509235	0.166	0.139	2836.39
Dram2	0.471682	0.0508837	0.22	0.199	3108.85
Malsu1	0.254827	0.0508619	0.117	0.089	2745.76
Pde7a	0.723177	0.0508528	0.226	0.228	2556.43
Ppfia3	0.40657	0.0507943	0.306	0.288	3073.67
Acap3	0.344895	0.0507712	0.166	0.142	3064.74
Bud31	0.233249	0.0507656	0.209	0.174	2581.84
Ccp110	0.557161	0.0507301	0.231	0.221	3031.51
Rad51d	0.0857186	0.0507173	0.103	0.064	1173.92
Rcn1	0.876146	0.0506965	0.346	0.363	1469.3
Ica1	0.3427	0.0506334	0.203	0.181	3058.6
Oxsr1	0.187769	0.0506087	0.191	0.153	2227.13
Atp6v1c2	0.0341993	0.050592	0.037	0.011	505.602
Asap3	0.103051	0.0505542	0.054	0.028	1385.1
Atp2b4	0.347283	0.0505201	0.323	0.295	3071.02
Adap1	0.674734	0.0505118	0.263	0.256	2866.94
Prpf38a	0.351296	0.0505077	0.157	0.135	3084.73
Tagap1	0.677427	0.0505071	0.274	0.27	2855.36
Phf8	0.460543	0.0504524	0.183	0.167	3090.24
Zfp866	0.145052	0.0504402	0.117	0.082	1812.71
Spcs3	0.227674	0.050398	0.209	0.174	2538.33
Naaa	0.30159	0.0503765	0.171	0.142	2852.74
Uvssa	0.6582	0.0503758	0.18	0.178	2894.11
Higd2a	0.470591	0.0503418	0.534	0.544	3107.79
Ddx25	0.345287	0.0503343	0.197	0.171	3065.8
Fam217b	0.580394	0.0503163	0.374	0.384	2975.1
Ncl	0.575495	0.0503112	0.769	0.829	3005.24
Zdhhc15	0.0174084	0.0502999	0.054	0.018	264.938
Zc2hc1c	0.295775	0.0502761	0.06	0.043	2814.59
Arxes2	0.5321	0.0502513	0.629	0.655	3013.28
Snrnp70	0.529658	0.0502376	0.911	0.915	3008.99
Capn2	0.52622	0.0502277	0.214	0.203	3008.93
Suv39h1	0.691568	0.0501956	0.246	0.242	2799.47
Ddah1	0.590185	0.0501819	0.249	0.242	2963.91
Glt8d1	0.86214	0.0501751	0.229	0.242	1550.99
Kdm3a	0.0975142	0.0501701	0.091	0.057	1320.15
Ctnnd2	0.658177	0.0501179	0.443	0.448	2894.66
Skp1a	0.223669	0.0501079	0.823	0.811	2503.08
Narfl	0.198391	0.0500821	0.086	0.06	2326.73
Ppp1r12b	0.375261	0.0500794	0.349	0.331	2964.19
Tnks1bp1	0.25266	0.0500326	0.066	0.046	2731.5
4833439L19Rik	0.764037	0.0500072	0.463	0.48	2337.19
Rbm3	0.50979	0.0499534	0.446	0.441	3012.35
Stoml2	0.725476	0.0499376	0.271	0.27	2542.07
Cux1	0.869407	0.0498971	0.277	0.288	1515.38
Gga2	0.55279	0.0498393	0.323	0.32	3029.84
Lyrm2	0.472418	0.0498125	0.189	0.171	3108.98
Wdr48	0.639658	0.0498064	0.269	0.267	2932.83
Opa1	0.526266	0.0498015	0.366	0.363	3008.67
Clvs2	0.577	0.0497689	0.271	0.267	2996.36
Ccnc	0.719908	0.0497399	0.286	0.288	2568.63
Fbxl14	0.459266	0.049707	0.143	0.128	3086.73
Slc12a7	0.0523005	0.0497055	0.034	0.011	752.918
Anxa5	0.402966	0.0496763	0.143	0.125	3060.93
Pigyl	0.427568	0.0496603	0.386	0.381	3140.91
Gm17586	0.118882	0.0495913	0.086	0.053	1538.34
Xndc1	0.67658	0.0495067	0.14	0.135	2859.23
Haus1	0.17172	0.0494687	0.071	0.046	2084.68
Mrpl36	0.180288	0.0494206	0.157	0.121	2162.73
Prorsd1	0.547361	0.0494002	0.091	0.082	3029.64
Cog8	0.563687	0.0492936	0.174	0.164	3021.93
Fam8a1	0.664683	0.0492864	0.577	0.616	2879.41
Smap2	0.420225	0.0492484	0.489	0.488	3123.12
Tro	0.638334	0.0492377	0.751	0.801	2934.42
Chkb	0.938086	0.0491918	0.211	0.224	603.189
Ckmt1	0.523737	0.0491838	0.494	0.502	3010.44
Mylk	0.0167245	0.0491676	0.029	0.004	254.965
Rhbdl3	0.0614434	0.0491675	0.069	0.036	869.854
Qpct	0.262454	0.0491587	0.123	0.096	2803.27
Rell2	0.479995	0.0491485	0.389	0.402	3120.45
Dlx6os1	0.286459	0.0491351	0.094	0.071	2752.3
Commd2	0.371536	0.0491006	0.137	0.117	3187.78
Sgsm3	0.601248	0.0490664	0.16	0.146	2962.95
Emc6	0.54509	0.0490263	0.46	0.488	3027.98
Osgepl1	0.1452	0.0490242	0.094	0.064	1813.98
Ankzf1	0.311446	0.0490067	0.146	0.121	2905.48
Mum1	0.606068	0.0489769	0.183	0.174	2957.61
Dnajc4	0.230735	0.0489539	0.109	0.082	2560.7
Emc9	0.754808	0.0489489	0.263	0.274	2422.18
Mtss1	0.229628	0.0489451	0.677	0.676	2553.24
Rps23	0.133827	0.0489284	1	1	1693.71
Sec24b	0.489325	0.048922	0.246	0.224	3099.38
Gfra1	0.813624	0.0489079	0.243	0.27	2036.5
Tmem240	0.423203	0.0488982	0.206	0.185	3132.55
Rnf208	0.310065	0.0488949	0.631	0.619	2897.87
Prpsap2	0.302584	0.0488571	0.211	0.185	2856.7
Smoc1	0.239723	0.0488481	0.083	0.06	2635.03
2210408I21Rik	0.210446	0.0488282	0.077	0.053	2400.77
Dgke	0.371394	0.0488171	0.32	0.292	3187.3
Gng5	0.958171	0.0488136	0.171	0.185	404.348
Itfg2	0.86658	0.0487959	0.406	0.427	1527.78
Rab33b	0.455397	0.0487781	0.18	0.164	3076.21
Rxrb	0.4334	0.0487767	0.177	0.16	3113.55
BC035947	0.105698	0.0487596	0.091	0.057	1415.72
Six3	0.439922	0.048754	0.043	0.032	3102.33
Srsf1	0.335817	0.0487079	0.769	0.74	3029.74
Syf2	0.672333	0.0486891	0.351	0.349	2873.55
Tmem56	0.383874	0.0486792	0.169	0.149	2996.91
Fkbp5	0.362193	0.0486746	0.111	0.093	3137.68
Dyrk2	0.466988	0.0486323	0.183	0.164	3101.27
Txn1	0.833446	0.048593	0.406	0.431	1793.58
Abcd4	0.715069	0.0485911	0.163	0.16	2579.25
Ssbp4	0.535893	0.0485903	0.62	0.637	3019.22
Rpl36	0.0328353	0.0485867	0.997	1	486.488
Pcna	0.0846827	0.0485424	0.08	0.046	1161.42
Acap2	0.397667	0.0485066	0.091	0.075	3040.16
Nup153	0.804447	0.0484826	0.18	0.181	2091.56
Hat1	0.240047	0.0484295	0.071	0.05	2637.15
Ndufc2	0.193971	0.0483749	0.577	0.555	2287.11
Ctnnbip1	0.794098	0.0483448	0.32	0.335	2144.86
Mif	0.207952	0.0483442	0.651	0.68	2378.13
4930444P10Rik	0.169909	0.0483329	0.04	0.021	2066.95
U2af1	0.570061	0.0483287	0.549	0.569	3023.03
Fam177a	0.574776	0.0482949	0.077	0.068	3011.83
Bloc1s5	0.641948	0.048225	0.134	0.153	2929.21
Gm3164	0.0150577	0.0482011	0.043	0.011	230.172
Yme1l1	0.528776	0.0481881	0.6	0.594	3009.27
Sv2b	0.329926	0.0481683	0.126	0.103	3001.99
Ndufa2	0.333388	0.0481585	0.929	0.915	3018.5
Mpped1	0.537077	0.0481558	0.169	0.157	3021.6
Zfp385a	0.43289	0.0481513	0.131	0.114	3111.18
Mrps16	0.960907	0.0481285	0.366	0.402	373.793
Mrpl2	0.579307	0.0481198	0.14	0.132	2984.59
Actr8	0.8975	0.0481152	0.223	0.235	943.272
Omg	0.645356	0.04811	0.337	0.349	2920.24
Arhgef15	0.481379	0.048108	0.243	0.231	3122.71
Tcp11l2	0.329423	0.0480957	0.091	0.071	3000.05
5730522E02Rik	0.0157027	0.0480923	0.043	0.011	239.812
Cdc42bpa	0.458906	0.0480794	0.551	0.559	3087.06
Tfpt	0.690393	0.0480593	0.154	0.149	2801.62
Usp40	0.863733	0.0480456	0.32	0.349	1544.35
Lipt2	0.0712627	0.0480451	0.063	0.032	996.538
Sh3kbp1	0.931809	0.0479933	0.257	0.267	648.539
6030458C11Rik	0.539105	0.0479864	0.229	0.221	3023.3
Lrrc57	0.24987	0.0479767	0.103	0.078	2708.59
Ints10	0.490599	0.0479602	0.131	0.117	3085.87
Tctn1	0.465277	0.0479377	0.08	0.068	3096.42
P2rx4	0.789984	0.0479371	0.137	0.135	2185.09
Dync1li2	0.557376	0.0479288	0.517	0.52	3030.45
Tfdp1	0.467755	0.0479126	0.251	0.238	3100.75
Cltc	0.391962	0.0478978	0.831	0.872	3026.34
Nvl	0.857759	0.0478864	0.337	0.363	1584.28
Rpl10a	0.256036	0.0478861	0.997	0.996	2753.67
Gm48960	0.411706	0.0478756	0.134	0.117	3092.32
Abca5	0.263014	0.0478333	0.294	0.263	2808.46
Lrrc41	0.664172	0.0478272	0.146	0.135	2879.85
Tspan7	0.232974	0.0478076	0.966	0.968	2579.96
Rarb	0.0261139	0.0477809	0.046	0.014	391.003
Slc25a29	0.0443727	0.0477593	0.083	0.043	645.445
Chrm1	0.0918698	0.0477063	0.066	0.036	1250.26
1700096K18Rik	0.266516	0.0476908	0.066	0.046	2641.44
Btbd11	0.75006	0.0476806	0.306	0.317	2445.2
Rbm24	0.477085	0.0476657	0.203	0.185	3116.32
Ltb	0.00684817	0.0476525	0.026	0	106.386
Ap1s2	0.115308	0.0475951	0.557	0.484	1497.73
Brix1	0.364558	0.0475663	0.109	0.089	3151.6
Slc17a5	0.589657	0.0475659	0.166	0.153	2966.56
Slc2a6	0.0916493	0.0475577	0.06	0.032	1247.53
Eef1a1	0.0210309	0.0475195	1	1	318.387
Vrk1	0.0958506	0.0474959	0.06	0.032	1300.5
Fbxo8	0.561758	0.047483	0.183	0.171	3027.32
Pex2	0.372289	0.0474508	0.146	0.125	2950.02
Rmi1	0.941079	0.0474477	0.214	0.228	573.117
Hacd2	0.197443	0.0474404	0.12	0.089	2318.37
Orc6	0.544221	0.0474246	0.234	0.221	3026.41
Lst1	0.0820468	0.0474183	0.051	0.025	1128.96
Gtf2h1	0.627565	0.0474183	0.237	0.231	2947.67
Rasgef1b	0.533494	0.0474059	0.317	0.306	3014.78
Dimt1	0.274177	0.0474053	0.129	0.103	2679.26
Sugp1	0.918505	0.047355	0.209	0.221	778.892
Pip5k1c	0.633558	0.0472762	0.431	0.431	2945.41
5930430L01Rik	0.584731	0.0472501	0.08	0.096	2969.27
Ap1b1	0.384236	0.0472437	0.437	0.42	2998.2
P3h3	0.732172	0.047234	0.231	0.231	2517.94
Cpne7	0.710732	0.047177	0.417	0.427	2604.12
Stoml1	0.83428	0.0471649	0.234	0.238	1789.53
Pgd	0.64987	0.0471309	0.169	0.16	2907.52
Hnrnpab	0.35406	0.0470975	0.631	0.651	3090.94
Snx29	0.975696	0.0470616	0.18	0.192	237.094
Mdh1	0.42375	0.0470298	0.734	0.772	3133.63
Stx7	0.39083	0.0469971	0.591	0.609	3022.29
Gm26917	0.823886	0.0469855	0.597	0.612	1973.21
Tmem115	0.552446	0.0469766	0.114	0.103	3030.72
Uap1l1	0.184941	0.0469675	0.057	0.036	2201.9
Samd4b	0.7334	0.0469341	0.294	0.306	2512.63
Cdyl	0.291926	0.0469285	0.097	0.075	2787.31
Atp23	0.247645	0.046906	0.063	0.043	2689.92
Pcyt1b	0.314791	0.0468875	0.106	0.085	2927.87
Pwp1	0.543269	0.0468796	0.083	0.071	3027.09
Brms1l	0.352938	0.0468687	0.297	0.27	3087.5
Zfp24	0.960564	0.0468677	0.223	0.231	379.423
Prmt8	0.150552	0.0468408	0.109	0.075	1870.3
Tpst1	0.323043	0.0468285	0.174	0.146	2969.41
Ric3	0.890769	0.0467979	0.369	0.402	1010.13
Eri3	0.587277	0.0467873	0.437	0.456	2968.1
Mccc2	0.223157	0.0467361	0.109	0.082	2498.69
Med18	0.235622	0.0467227	0.046	0.028	2602.21
Homez	0.467048	0.0466785	0.08	0.068	3100.27
Gtf2h3	0.352226	0.0466709	0.086	0.068	3087.62
Gm15624	0.0994682	0.0466676	0.06	0.032	1343.62
Grk3	0.374847	0.0466601	0.346	0.331	2963.16
Ubap2	0.476166	0.0466484	0.223	0.21	3112.22
Dnaja4	0.845077	0.0466394	0.114	0.114	1652.13
Adam19	0.271726	0.0466281	0.066	0.046	2670.25
Ndufa5	0.553124	0.0466191	0.811	0.819	3028.35
Clptm1	0.454219	0.0466074	0.4	0.399	3074.61
Mrps17	0.787882	0.0466033	0.349	0.367	2202.92
Ptn	0.863406	0.0465711	0.237	0.26	1546.36
Jup	0.403188	0.0465287	0.08	0.064	3061.4
Lcorl	0.606602	0.0465279	0.18	0.203	2955.36
Chmp4b	0.549955	0.0465246	0.777	0.811	3028.6
Fez2	0.386873	0.0464991	0.146	0.125	3007.94
Nfatc3	0.421927	0.0464974	0.106	0.089	3127.33
Iars	0.428939	0.046489	0.197	0.174	3126.11
Ppp1r9b	0.303412	0.0464547	0.414	0.381	2862.09
Pnma2	0.407365	0.0464541	0.577	0.584	3076.42
Clint1	0.646051	0.0464263	0.283	0.278	2919.5
Slc35e2	0.233724	0.0464235	0.117	0.089	2585.92
Pdcd2l	0.427759	0.0464211	0.063	0.05	3141.46
Eif1a	0.694505	0.0464017	0.417	0.431	2730.1
Rbsn	0.654517	0.0463789	0.283	0.288	2900.82
Chmp2b	0.52067	0.0463785	0.271	0.26	3009.48
Eml5	0.961396	0.0463583	0.32	0.352	368.215
Smim26	0.829768	0.0463334	0.58	0.609	1865.32
Tyms	0.196889	0.046329	0.066	0.043	2315.02
Aldh5a1	0.652054	0.0463222	0.346	0.352	2904.25
Fam185a	0.350134	0.0463172	0.083	0.064	3079.43
Fndc9	0.837682	0.0462847	0.363	0.37	1732.33
Ncaph2	0.793628	0.0462751	0.249	0.256	2152.32
Ubr7	0.183545	0.0462673	0.146	0.11	2189.7
Zfp952	0.912548	0.0462506	0.194	0.206	835.894
Kpna6	0.985062	0.0462489	0.303	0.324	147.759
Hnrnpa2b1	0.525864	0.0462335	0.9	0.904	3007.41
Dzip1l	0.51508	0.0462206	0.097	0.085	3009.61
Gna11	0.580227	0.0461949	0.514	0.52	2983.52
Gm9945	0.0733586	0.046192	0.037	0.014	1021.23
Ccdc90b	0.360137	0.0461735	0.12	0.1	3124.19
Rars	0.410566	0.0461612	0.169	0.146	3088.69
Setbp1	0.567801	0.0461341	0.163	0.153	3021.84
Oxld1	0.176222	0.0461142	0.063	0.039	2126.47
Pdia6	0.57159	0.0460999	0.371	0.377	3019.14
Tmc7	0.0322667	0.0460763	0.031	0.007	478.515
Bbs9	0.523867	0.0460727	0.074	0.064	3009.62
Arhgef3	0.680357	0.0460534	0.091	0.085	2839.81
A230057D06Rik	0.655312	0.0460422	0.543	0.552	2898.45
Abhd8	0.838847	0.0460325	0.589	0.609	1725.51
Neu1	0.55845	0.0460151	0.206	0.199	3026.8
Amt	0.785859	0.0459395	0.126	0.125	2215.34
Ccndbp1	0.628882	0.0459156	0.231	0.224	2945.68
Sbk1	0.754231	0.0458721	0.1	0.096	2424.85
Dusp22	0.734507	0.0458138	0.24	0.238	2502.47
Qars	0.875293	0.0458114	0.109	0.11	1473.99
Gm36839	0.114289	0.0458091	0.063	0.036	1511.24
Osbpl5	0.171802	0.0457951	0.08	0.053	2085.33
Cep131	0.350682	0.0457881	0.111	0.093	3082.15
Pfas	0.699367	0.0457355	0.203	0.199	2670.18
Avpi1	0.69045	0.0457321	0.103	0.096	2801.15
Atf1	0.0765236	0.0457058	0.126	0.082	1061.08
Hivep1	0.880925	0.0456998	0.18	0.185	1094.11
Armcx6	0.496328	0.045665	0.134	0.117	3069.29
Tox2	0.513404	0.0455862	0.454	0.466	3009.58
Slc2a1	0.241725	0.0455559	0.063	0.043	2649.3
Pmpca	0.517601	0.0455322	0.226	0.214	3007.78
Vps51	0.269091	0.0455315	0.057	0.039	2654.59
Pym1	0.581844	0.0455077	0.126	0.114	2976.13
Epha5	0.432414	0.0454964	0.617	0.601	3115.97
Mapk3	0.818383	0.0454601	0.386	0.406	2014.86
Zfp958	0.426589	0.0454489	0.051	0.039	3140.54
Atp5l	0.164644	0.0454406	0.909	0.947	2017.05
Ccdc112	0.494693	0.0454323	0.349	0.338	3073.53
Tmeff1	0.89566	0.0454074	0.357	0.381	968.208
Alg10b	0.527366	0.0453412	0.294	0.281	3009.68
Gm9801	0.186358	0.0453268	0.114	0.082	2214.68
Lama2	0.266213	0.0453244	0.083	0.06	2644.02
Odc1	0.230925	0.0453226	0.44	0.413	2562.11
Ogdhl	0.70377	0.0453188	0.183	0.178	2629.29
Ndufs7	0.914627	0.0453148	0.374	0.402	818.591
2900060B14Rik	0.237685	0.0453004	0.063	0.043	2618.1
4931428F04Rik	0.588222	0.0452941	0.174	0.164	2965.82
Wdr33	0.971637	0.0452658	0.169	0.181	273.03
Rasgef1c	0.153103	0.0452542	0.086	0.057	1894.8
Atp6v1h	0.402487	0.0452454	0.426	0.438	3059.71
Akr1a1	0.369008	0.0452196	0.814	0.815	3174.2
Mt3	0.465656	0.0452159	0.854	0.84	3097.08
Prpf19	0.249492	0.0451805	0.451	0.445	2705.99
Hs1bp3	0.754338	0.0451506	0.057	0.053	2422.93
Dnal1	0.758795	0.0451279	0.343	0.356	2385.65
Sgpl1	0.0643951	0.0451075	0.054	0.025	908.936
Rfk	0.615253	0.0451058	0.331	0.338	2957.52
Rpl18a	0.205168	0.0451	0.997	1	2389.59
F2r	0.25569	0.045091	0.103	0.078	2750.97
Tagln3	0.524473	0.0450847	0.731	0.754	3008.38
Alms1	0.577666	0.0450467	0.103	0.093	2997.51
Ubald2	0.479262	0.0450413	0.169	0.153	3121.43
Commd4	0.657041	0.0450349	0.249	0.249	2898.21
Cox14	0.200305	0.0450311	0.606	0.598	2344.17
BC003331	0.679358	0.0450304	0.294	0.295	2845.15
Arl6ip6	0.7675	0.0450272	0.163	0.164	2308.64
Erp29	0.373433	0.0450082	0.791	0.819	2957.21
Sox13	0.0915101	0.0449987	0.046	0.021	1246.09
Gm16894	0.350282	0.0449972	0.074	0.057	3079.68
Arfrp1	0.426515	0.0449942	0.277	0.26	3140.43
Rpl15	0.116484	0.0449895	0.994	1	1511.5
Ddit3	0.956923	0.0449647	0.271	0.285	419.132
Tldc1	0.0963267	0.0449592	0.06	0.032	1306.19
Arhgap39	0.514538	0.0449448	0.249	0.238	3010.05
Mtcp1	0.171945	0.0449409	0.04	0.021	2086.55
Nrip2	0.501703	0.0449299	0.243	0.235	3046.84
Zfp780b	0.697385	0.0449281	0.229	0.228	2676.56
Magel2	0.848935	0.0449128	0.523	0.548	1630.81
Slitrk3	0.632921	0.0448746	0.174	0.171	2947.51
Tmem19	0.346655	0.0448611	0.169	0.146	3069.29
Dopey1	0.81715	0.0448298	0.346	0.363	2020.81
Thbs3	0.390976	0.044819	0.1	0.082	3022.25
Ubxn6	0.624337	0.044803	0.249	0.242	2948.74
Map3k10	0.659851	0.0447487	0.26	0.253	2888.17
Scx	0.679651	0.0447242	0.063	0.057	2844.34
Mcm6	0.0873522	0.0447215	0.066	0.036	1194.02
Sostdc1	0.00710272	0.0447098	0.034	0.004	110.284
2010315B03Rik	0.101987	0.044704	0.151	0.107	1372.64
Sumo1	0.309481	0.0447035	0.866	0.858	2893.65
Cdc14a	0.137811	0.0446256	0.066	0.039	1734.49
Coq3	0.839631	0.0446129	0.166	0.185	1699.41
Chmp1b	0.448098	0.0445886	0.143	0.125	3061.85
Tdrd7	0.366218	0.0445846	0.089	0.071	3160.1
Zfp664	0.904688	0.0445721	0.403	0.434	896.546
Pdrg1	0.74834	0.0444232	0.22	0.246	2453.81
Tmem230	0.619593	0.0444195	0.12	0.11	2951.12
Actr3b	0.515219	0.0443973	0.274	0.249	3009.39
Cox11	0.236274	0.0443925	0.263	0.221	2607.04
Glra2	0.54109	0.0443657	0.314	0.359	3024.69
2610301B20Rik	0.628271	0.0443629	0.331	0.331	2947.22
Farp1	0.514752	0.0442834	0.111	0.096	3009.76
March5	0.330125	0.0442625	0.231	0.203	3001.5
Uba3	0.432066	0.044251	0.297	0.285	3116.06
Mov10	0.452396	0.0442425	0.077	0.064	3070.41
Rps2	0.144571	0.0442203	0.994	1	1807.72
Siah2	0.611067	0.0441912	0.069	0.06	2955.12
Hexim2	0.351647	0.0441848	0.154	0.128	3086.06
E130308A19Rik	0.678407	0.0441321	0.114	0.107	2850.67
Cul2	0.992414	0.0440947	0.246	0.26	78.4007
Dkc1	0.711235	0.0440944	0.211	0.214	2599.56
Lrp12	0.83967	0.0440847	0.169	0.171	1697.81
Galt	0.617777	0.0440808	0.137	0.128	2952.97
Surf2	0.454003	0.0440791	0.283	0.26	3074.51
Taf11	0.702181	0.0440643	0.317	0.32	2640.2
Zfyve9	0.553092	0.0440596	0.229	0.221	3028.73
Slc25a10	0.221003	0.0439798	0.077	0.053	2486.95
Dbpht2	0.996248	0.0439787	0.663	0.669	38.8537
Adgrb1	0.919087	0.0438433	0.411	0.423	772.033
Olfm2	0.424908	0.0438391	0.326	0.306	3135.39
Gm19345	0.421674	0.0438364	0.051	0.039	3126.71
Srsf12	0.995671	0.0438167	0.251	0.267	41.8182
Ddb2	0.557284	0.0438115	0.051	0.043	3031.07
Gorab	0.451272	0.0438007	0.097	0.082	3069.55
Dcun1d3	0.712861	0.0437966	0.14	0.135	2594.1
Taf2	0.48423	0.0437908	0.171	0.153	3116.02
Klhdc3	0.306141	0.0437453	0.403	0.384	2877.12
Cbx6	0.940909	0.0437341	0.731	0.79	577.718
Mlst8	0.39926	0.0437328	0.1	0.082	3047.55
Megf6	0.41066	0.0437229	0.071	0.057	3088.57
Adar	0.819197	0.0437113	0.666	0.708	2011.13
Sez6	0.729877	0.0436837	0.28	0.32	2527.56
Asap2	0.929846	0.0436099	0.22	0.231	663.91
Ndufaf8	0.453805	0.0436083	0.586	0.573	3073.62
Spr	0.750243	0.043606	0.177	0.178	2442.79
Scmh1	0.809437	0.0436051	0.369	0.416	2060.02
Ctsz	0.202462	0.0435839	0.086	0.06	2363.34
Gpank1	0.265425	0.0435561	0.134	0.107	2824.65
Mrpl30	0.662594	0.0435522	0.609	0.63	2881.62
Nlgn2	0.52872	0.0435518	0.723	0.776	3009.47
Rhot2	0.948989	0.0435394	0.237	0.256	503.913
Smarca2	0.840087	0.0435306	0.743	0.808	1695.3
Rps6	0.0635845	0.0435154	1	1	898.195
Limch1	0.628839	0.0435136	0.346	0.406	2946.11
Hsp90b1	0.574978	0.0435033	0.703	0.747	3011.73
Clcn2	0.116805	0.0434897	0.077	0.046	1514.73
Enpp4	0.242883	0.0434717	0.08	0.057	2657.38
Grasp	0.216592	0.0434622	0.029	0.014	2457.24
Sh2d5	0.682399	0.0434538	0.243	0.238	2834
Dph3	0.875245	0.043438	0.274	0.285	1474.79
Cep41	0.209008	0.0434253	0.094	0.068	2387.92
Smim18	0.393632	0.0434188	0.12	0.1	3030.18
Cdh6	0.320815	0.0434134	0.091	0.071	2958.88
Cnbp	0.772934	0.0433965	0.671	0.683	2280.15
Zfp40	0.402173	0.0433911	0.114	0.096	3058.53
Cir1	0.596069	0.043383	0.343	0.335	2964.85
Tsr1	0.298587	0.0433758	0.134	0.107	2833.89
Mterf3	0.282715	0.0433529	0.077	0.057	2726.51
Mchr1	0.219209	0.0433309	0.051	0.032	2474.88
Sept1	0.665481	0.0433309	0.16	0.157	2879.54
Itsn1	0.681425	0.0433298	0.346	0.359	2836.09
Cic	0.91668	0.0432714	0.286	0.302	799.345
Acss2	0.126644	0.0432687	0.114	0.078	1615.72
Lyrm1	0.3585	0.0432633	0.103	0.082	3113.57
Orc5	0.523743	0.0432613	0.109	0.096	3009.95
Lrrc45	0.304746	0.0432067	0.274	0.249	2869.8
Plekhf2	0.272828	0.0432032	0.04	0.025	2677.26
Mtpap	0.290257	0.0432027	0.117	0.093	2775.73
Stx1b	0.534204	0.0431759	0.666	0.726	3015.58
Rlim	0.583559	0.0430864	0.403	0.409	2970.31
Usp4	0.949209	0.0430864	0.317	0.342	500.233
Kcnip1	0.599013	0.0430796	0.323	0.317	2966.91
Isg20l2	0.106538	0.0430607	0.054	0.028	1425.8
Supv3l1	0.134564	0.0430424	0.066	0.039	1701.69
Spryd7	0.585674	0.0430325	0.563	0.559	2968.78
Chmp5	0.97431	0.0430179	0.466	0.502	250.398
Sik3	0.72315	0.0429933	0.531	0.53	2557.78
Eloc	0.506046	0.0429583	0.569	0.577	3025.15
Dcbld2	0.667604	0.0429515	0.123	0.117	2880.04
Rabgef1	0.830792	0.042932	0.146	0.146	1857.65
Gatad2b	0.6928	0.0429317	0.62	0.673	2791.29
Gpr89	0.410231	0.0429087	0.143	0.121	3086.99
Lyplal1	0.27906	0.0429014	0.04	0.025	2700.47
Taldo1	0.536404	0.0428871	0.129	0.117	3019.95
Gpr155	0.171376	0.0428652	0.097	0.068	2081.36
Dnah1	0.686347	0.0428624	0.12	0.114	2819.51
Erg28	0.675577	0.0428294	0.337	0.335	2862.42
Scrib	0.729896	0.0428047	0.16	0.157	2526.9
Mff	0.181802	0.0427965	0.666	0.655	2175.26
Fstl3	0.17652	0.0427856	0.054	0.032	2129.37
Clp1	0.43159	0.0427559	0.063	0.05	3115.65
Plk2	0.357644	0.0427313	0.086	0.068	3108.28
Ift27	0.54004	0.0427208	0.114	0.103	3024.76
Nptx2	0.160301	0.0427077	0.046	0.025	1971.86
Emc7	0.971074	0.0426925	0.546	0.584	279.669
Ccdc138	0.47359	0.0426456	0.066	0.053	3111.01
Prex1	0.442092	0.0426382	0.109	0.093	3084.92
Tmf1	0.781687	0.0426307	0.34	0.345	2241.88
Tor2a	0.712382	0.0425566	0.097	0.093	2597.34
Enho	0.528694	0.042543	0.323	0.327	3009.86
Ppm1h	0.866967	0.0425054	0.214	0.235	1525.86
Fgf13	0.927094	0.0424821	0.314	0.335	701.81
D830035M03Rik	0.0354489	0.0424532	0.037	0.011	522.943
AI837181	0.657788	0.0424404	0.171	0.164	2894.92
Sf3b2	0.538592	0.0424101	0.614	0.63	3022.04
Maoa	0.45466	0.0423876	0.414	0.416	3074.41
Mt1	0.498728	0.0423844	0.474	0.47	3059.69
Bola2	0.572063	0.0423843	0.637	0.665	3020.49
Rfx3	0.842488	0.0423705	0.251	0.274	1674.87
C1galt1c1	0.788775	0.0423697	0.134	0.149	2195.16
4933404O12Rik	0.411314	0.0423405	0.083	0.068	3091.44
Zik1	0.633094	0.0423312	0.203	0.196	2947.68
Mrps11	0.587115	0.042316	0.16	0.149	2967.87
Ippk	0.563764	0.0422923	0.089	0.078	3021.21
Dbnl	0.959032	0.0422819	0.303	0.335	401.834
Cnih1	0.944369	0.0422715	0.426	0.466	543.957
Dennd6a	0.563346	0.0422206	0.211	0.199	3024.6
Mmachc	0.0719485	0.0422065	0.083	0.046	1005.05
Ldlrad4	0.0869651	0.0421703	0.051	0.025	1189.68
Adam22	0.672367	0.0421594	0.674	0.701	2873.03
Slk	0.328899	0.0421514	0.137	0.114	2998.57
Epb41l4a	0.254708	0.0421409	0.111	0.085	2744.98
Phc2	0.271742	0.0420861	0.266	0.231	2670.13
Fam131c	0.512908	0.0420478	0.091	0.078	3010.26
Smim19	0.823218	0.0420187	0.4	0.402	1978.19
Trp53bp2	0.634404	0.0419649	0.091	0.082	2941.1
Itgb1bp1	0.577137	0.0419237	0.094	0.085	2995.92
Wdr35	0.941077	0.041859	0.22	0.231	574.057
Fam69b	0.863711	0.0418326	0.329	0.352	1545.18
Golga2	0.658568	0.0417657	0.337	0.331	2891.77
Gm45716	0.843767	0.0417608	0.077	0.085	1661.38
Pabpc1	0.782732	0.0417467	0.451	0.463	2237.05
Map3k7	0.948143	0.0417275	0.149	0.157	508.205
Ap3b2	0.570078	0.0417161	0.306	0.295	3022.55
Xrcc4	0.490678	0.0416932	0.069	0.057	3084.4
Arhgef18	0.509421	0.04169	0.14	0.128	3012.21
Zfp931	0.515694	0.0416691	0.131	0.117	3010.11
Pnp2	0.0977972	0.0416556	0.04	0.018	1323.59
Ppp2r2c	0.333523	0.0416266	0.731	0.722	3018.05
Cnnm1	0.79424	0.0416053	0.466	0.466	2142.86
Ap2s1	0.476877	0.0416047	0.4	0.409	3115.91
Abcd1	0.746792	0.0415763	0.069	0.064	2458.44
Sf1	0.390356	0.0415486	0.454	0.445	3019.8
Mllt6	0.51636	0.0415459	0.18	0.167	3008.83
Gm2415	0.639908	0.0415304	0.114	0.107	2932.06
Glt1d1	0.567128	0.0415278	0.126	0.117	3023.92
Mzt2	0.393518	0.0415278	0.069	0.053	3029.7
Gpr176	0.299493	0.0415243	0.08	0.06	2838.9
Mta1	0.693189	0.0415172	0.277	0.278	2789.39
Sptbn4	0.928315	0.0415164	0.22	0.238	679.527
Rexo4	0.996967	0.0414723	0.154	0.164	29.909
Plekha1	0.606938	0.0414574	0.277	0.274	2953.97
Fam84a	0.677936	0.0414558	0.331	0.345	2854.11
Atg101	0.551846	0.0414377	0.126	0.114	3030.18
Zbtb7c	0.97859	0.0414193	0.146	0.157	213.333
Pofut2	0.72946	0.0413572	0.229	0.221	2529.04
Oard1	0.345904	0.0413483	0.143	0.121	3067.48
Pgam5	0.953214	0.0413152	0.28	0.302	462.309
Mapk8	0.499763	0.041315	0.463	0.445	3056.05
Slc35a3	0.231036	0.0413105	0.126	0.096	2563.11
B4galt5	0.873299	0.0412796	0.294	0.302	1491.6
Dctn3	0.893991	0.0412752	0.391	0.416	979.815
Krtcap2	0.74527	0.0412594	0.451	0.512	2460.14
Zfp945	0.811912	0.0412572	0.109	0.107	2046.83
Rab11fip4	0.63761	0.0411737	0.606	0.609	2936.19
Mark1	0.958089	0.0411549	0.197	0.203	405.271
Fars2	0.316787	0.0411462	0.08	0.06	2941.37
Aarsd1	0.556107	0.0411111	0.074	0.064	3030.79
Mei4	0.0745959	0.0411017	0.043	0.018	1037.26
Slc52a2	0.34871	0.0410294	0.074	0.057	3075.28
Tgfb2	0.336672	0.0410176	0.071	0.053	3031.05
Mrpl34	0.772526	0.0409968	0.191	0.192	2285.13
Rab39b	0.83021	0.040996	0.257	0.26	1862.16
Diaph2	0.0593686	0.040966	0.066	0.032	842.915
Vamp7	0.582785	0.0409628	0.28	0.27	2971.04
Cyth1	0.558213	0.0408878	0.2	0.185	3026.07
Cript	0.965963	0.0408854	0.469	0.52	332.291
Ppt2	0.554618	0.0408803	0.114	0.103	3029.32
Mrpl15	0.737034	0.0408713	0.143	0.139	2491.17
[truncated: 14,028 more rows]

## Sheet: P50FvsP50M_Vgat1
	p_val	avg_logFC	pct.1	pct.2	p_val_adjust
Xist	1.25239e-42	3.25719	0.898	0	1.73794e-38
Slc18a2	1.54173e-07	0.915552	0.47	0.176	0.00213746
Tsix	1.64001e-07	0.878933	0.205	0	0.00227355
Spint2	4.89056e-07	0.837871	0.47	0.218	0.00677929
Fgfr1	5.08117e-06	0.820755	0.464	0.252	0.0703742
Scg2	4.36577e-15	0.806025	0.964	0.798	6.05706e-11
Chodl	3.13683e-05	0.77316	0.295	0.101	0.43376
Npy2r	7.4407e-05	0.731703	0.464	0.277	1.02816
Cartpt	0.0151607	0.703559	0.163	0.067	199.863
Rps27rt	1.15749e-06	0.698191	0.398	0.143	0.0160429
Sema3a	0.00180008	0.662643	0.127	0.025	24.5692
Vgf	0.576993	0.651418	0.205	0.185	2444.14
Gabre	0.000823682	0.641435	0.404	0.261	11.2984
Msi2	0.000402616	0.634411	0.325	0.168	5.53878
Pdia3	0.000220432	0.630918	0.458	0.319	3.03843
Rpl39	7.77221e-05	0.620774	0.717	0.555	1.07365
Pcsk2	0.00895458	0.595055	0.416	0.311	119.481
Tmem158	0.00128942	0.576267	0.633	0.529	17.6483
Nop56	0.00210321	0.539358	0.578	0.471	28.671
Plp1	0.00323879	0.535852	0.289	0.16	43.9924
Olfm3	0.00106925	0.529164	0.494	0.336	14.6476
Cacna2d1	0.00997085	0.519297	0.271	0.151	132.732
Ccdc39	0.00960748	0.51033	0.193	0.092	127.981
Lman2l	0.000833397	0.508107	0.44	0.286	11.4309
Galnt14	0.00391858	0.506057	0.205	0.084	53.038
Tmem147	0.00412873	0.50152	0.229	0.101	55.8699
Hspa5	0.000315453	0.494126	0.62	0.471	4.34473
Smim26	0.00939337	0.489193	0.247	0.134	125.223
Pld3	0.000342671	0.486312	0.566	0.437	4.71619
Gm48855	0.00675787	0.482315	0.217	0.101	90.7447
Selenok	0.000748193	0.481125	0.602	0.487	10.2682
Gm1673	9.23197e-06	0.480592	0.747	0.605	0.127807
Brd9	0.00870073	0.479375	0.259	0.143	116.163
Uba3	0.00527783	0.478132	0.163	0.059	71.1452
Pcp4	1.43282e-05	0.477992	0.855	0.765	0.198302
Ntng1	0.000157551	0.474177	0.777	0.588	2.17326
Smpd3	0.0231715	0.468441	0.253	0.168	300.164
Plxnc1	0.000421472	0.467241	0.488	0.311	5.79693
Kl	0.00442207	0.458096	0.133	0.034	59.7775
Pde1c	0.0216388	0.452289	0.229	0.134	281.023
Ssbp4	0.00172501	0.447674	0.518	0.387	23.555
Ext2	0.00905249	0.445767	0.289	0.168	120.751
Tmem255a	5.4481e-06	0.444999	0.837	0.655	0.0754507
Negr1	0.000320572	0.442219	0.783	0.689	4.41427
Gal	0.7933	0.436841	0.452	0.471	1621.5
Slc17a8	0.00906316	0.434381	0.09	0.017	120.884
Plppr4	0.000161951	0.434163	0.627	0.454	2.23379
Plxna2	0.0082924	0.432012	0.343	0.227	110.845
Agpat4	0.00320469	0.421445	0.398	0.244	43.5389
Spcs2	0.0159004	0.421351	0.452	0.37	209.25
Naxe	0.0853797	0.420143	0.199	0.134	1000.22
Pam16	0.0606197	0.420095	0.235	0.16	734.469
Gpc5	0.0407055	0.419026	0.114	0.05	507.719
Tcf4	0.0176261	0.416528	0.235	0.126	231.113
Mfsd14b	0.0188915	0.416082	0.211	0.118	246.421
Tmed2	0.0163494	0.415795	0.524	0.479	215.012
Luzp2	0.00349106	0.415009	0.211	0.084	47.3772
Il13ra1	0.0753698	0.414578	0.193	0.126	897.353
Txndc16	0.0269953	0.413412	0.259	0.168	347.16
Atp1b3	0.010967	0.413221	0.428	0.336	145.718
Pcdh10	0.00175908	0.412797	0.602	0.462	24.0149
mt-Nd3	8.40378e-08	0.412149	0.946	0.849	0.00116544
Zfp462	0.17696	0.411342	0.229	0.193	1797.91
Rps28	0.00196757	0.410645	0.693	0.63	26.8436
Hist3h2ba	0.0246262	0.406715	0.193	0.101	318.047
Rpn1	0.0166105	0.406672	0.355	0.252	218.295
Cst3	0.000920999	0.406383	0.62	0.487	12.6269
Ampd2	0.0421184	0.406289	0.223	0.143	524.501
Ftx	0.00210102	0.406232	0.181	0.059	28.6432
Ndufb4	0.0380627	0.404643	0.181	0.101	480.466
Plppr5	0.0795088	0.403682	0.199	0.134	942.417
Lrrc73	0.0762952	0.403323	0.114	0.059	907.302
Mmd	0.00623835	0.40274	0.361	0.244	83.8995
4930447C04Rik	0.109104	0.401937	0.151	0.092	1215.09
Pgap1	0.0049256	0.401524	0.56	0.445	66.4907
P4hb	0.109618	0.401075	0.319	0.286	1219.06
Sgpp1	0.0922222	0.400725	0.331	0.294	1066.36
Sptssa	0.0133413	0.398266	0.229	0.118	176.479
Chpt1	0.265225	0.398149	0.253	0.235	2144.35
Mosmo	0.0449324	0.395356	0.229	0.151	557.431
Srsf5	0.000766452	0.391715	0.657	0.538	10.5165
Tmem132c	0.0349455	0.390477	0.108	0.042	444.087
Hnrnpk	0.00932773	0.389432	0.44	0.345	124.367
Nus1	0.0260427	0.388273	0.343	0.252	335.508
Tmed10	0.0129192	0.38765	0.584	0.555	171.025
Lrpap1	0.00719593	0.38197	0.512	0.403	96.5621
Gdpd1	0.0601151	0.381136	0.313	0.244	728.715
Atp5e	0.0985808	0.380094	0.247	0.193	1112.29
Nenf	0.00424225	0.37878	0.711	0.664	57.3721
Cdh11	0.0651909	0.377365	0.139	0.076	785.485
Thoc2	0.0109669	0.377038	0.38	0.277	145.729
Lrrn1	0.0311745	0.376822	0.12	0.05	398.285
Srprb	0.0634922	0.371736	0.229	0.16	766.668
Pank4	0.00583835	0.371512	0.096	0.017	78.6016
Mbnl1	0.0394496	0.370276	0.187	0.109	496.395
Emc6	0.0103469	0.369131	0.247	0.134	137.604
Slc39a10	0.166582	0.367999	0.325	0.303	1712.63
Wdr89	0.0412877	0.36747	0.169	0.092	514.61
Dhx15	0.06219	0.366344	0.163	0.092	751.877
Rps25	0.0943895	0.365053	0.693	0.672	1088.22
Lin7b	0.0131542	0.36429	0.217	0.109	174.082
Gpr27	0.0862035	0.364247	0.169	0.109	1008.75
Alg10b	0.131236	0.363358	0.169	0.118	1430.34
Pgr15l	0.0136682	0.362919	0.229	0.118	180.666
Ptpro	0.00502442	0.3619	0.554	0.429	67.7894
Tm9sf4	0.198436	0.360478	0.253	0.218	1979.8
Upf3b	0.0652265	0.359978	0.169	0.101	785.849
Dnajc3	0.0622006	0.357679	0.235	0.16	751.943
Zcrb1	0.0344914	0.35744	0.319	0.227	438.662
Nectin3	0.0341254	0.357165	0.163	0.084	434.485
Slc35a1	0.0263006	0.356419	0.151	0.067	338.725
Hsph1	0.1245	0.355595	0.283	0.227	1366.76
Srsf9	0.044771	0.354433	0.241	0.151	555.518
Ssr1	0.00104782	0.35243	0.807	0.731	14.3551
B3galnt1	0.190491	0.352006	0.217	0.176	1907.96
Rap1gap	0.166456	0.35157	0.295	0.252	1712.33
Tmco1	0.125177	0.351161	0.223	0.168	1373.32
Ddost	0.277838	0.35111	0.289	0.269	2226.59
Cnbp	0.0541325	0.350422	0.223	0.143	663.935
Esr1	0.0725803	0.349403	0.163	0.101	866.609
Erp44	0.0344007	0.349229	0.133	0.059	437.68
Ctsb	0.0535239	0.34877	0.542	0.513	657.166
Fam8a1	0.00587681	0.348613	0.56	0.462	79.1019
Rps17	0.00160409	0.348257	0.651	0.529	21.9119
Gm48960	0.0376845	0.348082	0.187	0.101	476.446
Tmem132b	0.042576	0.347902	0.265	0.176	529.816
Htr1b	0.0373839	0.347823	0.193	0.109	472.831
Papd4	0.0513938	0.347237	0.09	0.034	632.503
Fut8	0.170375	0.346939	0.313	0.277	1746.52
Son	0.00423885	0.346869	0.62	0.529	57.3346
Mbp	0.0133298	0.345823	0.247	0.126	176.353
Nfx1	0.089983	0.344954	0.211	0.143	1043.44
Wsb1	0.0107765	0.343444	0.578	0.504	143.231
Pcmtd2	0.206079	0.342027	0.175	0.126	2040.8
Nrsn1	0.00912002	0.341001	0.735	0.706	121.625
Esyt3	0.0229228	0.340492	0.127	0.05	297.126
Mal2	0.0282808	0.339824	0.319	0.227	362.814
Gtf2e1	0.047489	0.339684	0.078	0.025	587.628
Rpl36al	0.0980517	0.339632	0.271	0.202	1107.49
Igsf1	0.0421874	0.337348	0.114	0.05	525.276
Sirpa	0.0231268	0.337091	0.518	0.462	299.631
Slc24a5	0.091731	0.336948	0.506	0.462	1061.51
Paxbp1	0.0309231	0.336603	0.247	0.143	395.229
Kcns2	0.189024	0.336005	0.187	0.143	1894.59
Slc6a11	0.0693453	0.335786	0.319	0.252	830.688
Rpl31	0.0527128	0.335522	0.765	0.723	647.576
Nptn	0.000906812	0.334569	0.651	0.479	12.4351
Rpl27	0.069073	0.33426	0.416	0.345	827.771
Rps8	0.00899837	0.33419	0.91	0.824	120.038
Sdf2	0.112408	0.334031	0.265	0.21	1246.38
Sumo1	0.149987	0.333614	0.235	0.185	1575.31
Cd164	0.172989	0.333551	0.211	0.168	1769.5
Pnisr	0.00648388	0.332623	0.723	0.697	87.1563
Fam135a	0.016908	0.332586	0.108	0.034	222.12
Lamtor4	0.0540233	0.331854	0.319	0.235	662.812
Tspan13	0.0922529	0.331451	0.482	0.445	1066.63
Ptprz1	0.0556464	0.330925	0.319	0.227	681.167
Ccnl1	0.136683	0.330196	0.361	0.319	1477.13
Serpini1	0.11563	0.32984	0.331	0.277	1277.72
Bcap31	0.13568	0.329139	0.205	0.151	1468.47
Nsd2	0.229843	0.328933	0.217	0.185	2195.92
Rgs4	0.0332999	0.328308	0.145	0.067	424.44
Stxbp2	0.0649099	0.327632	0.12	0.059	782.424
Abca2	0.0222235	0.32579	0.488	0.403	288.417
Cdc14a	0.006567	0.325231	0.06	0	88.2408
App	0.000365858	0.324187	0.88	0.824	5.03385
Cox6b1	0.134044	0.323295	0.283	0.227	1454.91
N4bp2l2	0.0175259	0.323047	0.398	0.277	229.94
Sec11a	0.0584071	0.32295	0.157	0.084	709.647
Plekhb1	0.221045	0.32292	0.102	0.067	2141.27
Tnr	0.391086	0.322246	0.133	0.109	2662.12
Dnajb9	0.206037	0.321049	0.259	0.218	2040.8
Sh3bgrl3	0.0855614	0.319923	0.211	0.143	1002.18
Calr	0.0241286	0.319872	0.663	0.622	311.887
Elmo1	0.261033	0.319408	0.187	0.151	2116.46
Polr2i	0.0718248	0.317673	0.096	0.042	858.019
Tram1l1	0.027993	0.317316	0.349	0.235	359.374
Cnot7	0.0260386	0.316287	0.265	0.16	335.482
Dpp10	0.00951701	0.315078	0.536	0.378	126.805
Nxf1	0.0446196	0.315045	0.386	0.277	553.818
Mettl9	0.0613305	0.314273	0.163	0.092	742.405
Pdia4	0.141983	0.313681	0.163	0.109	1524.19
Sez6l2	0.0807599	0.312849	0.428	0.37	955.066
Atrx	0.0403925	0.312715	0.404	0.303	507.572
Abi1	0.0160928	0.312703	0.169	0.076	211.717
Hnrnph1	0.00875291	0.312588	0.53	0.395	116.851
Aurkaip1	0.455775	0.31234	0.12	0.101	2397.38
Ptn	0.520752	0.312162	0.199	0.185	2416.81
Crocc	0.0997562	0.311875	0.223	0.16	1123.25
Mios	0.0199323	0.311743	0.078	0.017	259.519
Cfap69	0.0251283	0.311163	0.102	0.034	324.256
Pgrmc1	0.00109786	0.310899	0.855	0.815	15.0363
Atp5f1	0.275515	0.309367	0.151	0.118	2212.11
Tmem136	0.030634	0.309045	0.072	0.017	391.779
Tnxb	0.0499484	0.308933	0.102	0.042	616.114
Knop1	0.177718	0.308585	0.157	0.109	1797.97
Neo1	0.260285	0.30805	0.271	0.235	2111.69
Slc45a4	0.0718519	0.307966	0.127	0.067	858.271
Hspa13	0.0961806	0.307887	0.337	0.294	1088.86
Rhobtb2	0.0245778	0.307229	0.151	0.067	317.471
Canx	0.000755537	0.306556	0.88	0.782	10.3682
Cpeb4	0.301106	0.306206	0.139	0.109	2372.11
Slc27a1	0.0812601	0.306066	0.114	0.059	960.088
Large1	0.100705	0.305944	0.295	0.227	1132.73
Tmem59l	0.0208983	0.305589	0.506	0.395	271.741
Pex6	0.0166306	0.305459	0.096	0.025	218.542
Pcdhb17	0.158052	0.305232	0.102	0.059	1641.37
Tmem131	0.123274	0.305143	0.259	0.202	1354.66
Lrch3	0.35853	0.304787	0.12	0.092	2631.97
Myef2	0.0965333	0.304647	0.349	0.277	1092.08
Atp6ap2	0.0527656	0.304439	0.53	0.487	648.119
Creld2	0.0638166	0.304193	0.108	0.05	770.138
Rtl8a	0.00210541	0.304164	0.861	0.84	28.6988
Plxnb1	0.0644944	0.303533	0.12	0.059	777.674
Calcr	0.512017	0.303423	0.133	0.109	2409.04
Cd81	0.00348951	0.303358	0.614	0.471	47.3597
Acaa1a	0.173905	0.302191	0.12	0.076	1775.39
Orc4	0.139656	0.301951	0.223	0.168	1505.07
Ptprn	0.00111572	0.30187	0.801	0.714	15.2798
Th	0.153145	0.301859	0.114	0.067	1601.13
Qpct	0.10093	0.300828	0.078	0.034	1134.86
Dgkz	0.145288	0.300682	0.163	0.109	1538.6
Arpc1b	0.0115491	0.300613	0.072	0.008	153.303
Chgb	0.141755	0.300254	0.367	0.353	1522.17
Fbxo11	0.118535	0.299634	0.223	0.16	1307.44
Zfp639	0.0488552	0.299055	0.102	0.042	603.557
Atg4d	0.0201127	0.297819	0.12	0.042	261.767
Glce	0.048123	0.297526	0.265	0.176	594.945
Arhgap1	0.140973	0.297474	0.102	0.059	1516.73
Polr2g	0.142607	0.297409	0.181	0.126	1516.62
Pcdh15	0.372016	0.297148	0.295	0.277	2680.38
mt-Atp6	1.36822e-08	0.297048	1	1	0.000189786
Tsr3	0.020747	0.296806	0.133	0.05	269.793
2610507B11Rik	0.213401	0.296752	0.235	0.202	2090.9
Flii	0.0421245	0.295549	0.12	0.05	524.534
Minos1	0.166806	0.295417	0.355	0.319	1714.6
Cyp46a1	0.129722	0.295205	0.247	0.185	1416.05
Retreg1	0.0984377	0.294821	0.229	0.168	1110.97
Rsph9	0.0744011	0.294802	0.096	0.042	887.084
Abca7	0.0327068	0.294518	0.084	0.025	417.404
Pcf11	0.0501883	0.294123	0.181	0.101	618.722
Plcb4	0.154209	0.292733	0.181	0.126	1610.87
Psmb1	0.113938	0.290962	0.295	0.235	1261.29
Zcchc7	0.260159	0.290725	0.367	0.345	2111.19
Srpr	0.43129	0.290625	0.229	0.218	2334.14
Rif1	0.204706	0.290142	0.133	0.092	2029.66
Eloc	0.0879777	0.289878	0.205	0.134	1026.79
Xrcc1	0.0994634	0.289301	0.078	0.034	1120.65
Usp33	0.184779	0.289225	0.271	0.218	1857.59
Stxbp3	0.0318548	0.288818	0.072	0.017	406.786
Hnrnpd	0.330695	0.288657	0.193	0.168	2497.41
Cacng7	0.140316	0.288459	0.084	0.042	1511.2
Wdr12	0.210864	0.288114	0.127	0.084	2073.43
Spock1	0.199292	0.287949	0.554	0.479	1987.14
Nrsn2	0.00616167	0.28748	0.759	0.697	82.8991
Rpl22l1	0.0264623	0.287009	0.789	0.697	340.622
Psmb6	0.50831	0.286977	0.127	0.109	2406.34
Smc5	0.451774	0.286412	0.187	0.168	2387.17
Saraf	0.0285357	0.285709	0.723	0.672	365.884
Bcl11a	0.228489	0.28527	0.199	0.16	2187.55
Rgs9	0.0107892	0.285231	0.12	0.034	143.389
Elovl5	0.136006	0.285117	0.175	0.118	1470.63
Cox7b	0.123831	0.284925	0.223	0.16	1360.03
Cd24a	0.154271	0.284914	0.157	0.101	1611.36
G6pc3	0.244776	0.284896	0.139	0.101	2028.46
Ei24	0.112658	0.284007	0.259	0.193	1248.7
Tvp23b	0.183275	0.283333	0.157	0.109	1843.38
Ythdc1	0.468852	0.283055	0.163	0.143	2415.06
Txndc5	0.17213	0.282963	0.259	0.218	1762.61
Gpm6a	0.00133076	0.282347	0.898	0.849	18.2101
Slc35b1	0.257211	0.282342	0.157	0.118	2095.75
Phf2	0.0505927	0.28199	0.09	0.034	623.303
Celf6	0.229831	0.281717	0.211	0.168	2196.04
Tnpo1	0.325428	0.281637	0.114	0.084	2476.51
Commd7	0.197667	0.281614	0.096	0.059	1972.52
Tm2d1	0.0876225	0.281119	0.392	0.345	1022.99
Ssr3	0.104892	0.28075	0.5	0.462	1174.69
Ndufb11	0.118084	0.280565	0.325	0.261	1303.18
Rab3b	0.141225	0.280534	0.084	0.042	1518.59
Ipo5	0.213848	0.280391	0.114	0.076	2094.64
Cep70	0.00704	0.280312	0.078	0.008	94.4979
Itm2c	0.000622535	0.280009	0.928	0.857	8.55238
Gm26981	0.0195902	0.279548	0.096	0.025	255.182
Por	0.196707	0.279544	0.217	0.168	1963.93
Gmcl1	0.0500196	0.27949	0.187	0.109	616.842
Fam19a1	0.108604	0.279382	0.102	0.05	1209.96
Mark2	0.401045	0.279054	0.133	0.109	2681.79
Man2a2	0.049966	0.279016	0.452	0.378	616.281
Sh3glb1	0.196482	0.278836	0.127	0.084	1962.46
Aamp	0.149926	0.278769	0.133	0.084	1574.82
Ormdl1	0.152771	0.278153	0.102	0.059	1598.14
Mef2c	0.224682	0.278088	0.096	0.059	2164.58
Pde7a	0.253309	0.277651	0.133	0.092	2075.36
Pkd2	0.0424206	0.277086	0.12	0.05	527.966
Apba1	0.0662616	0.277033	0.06	0.017	797.525
Mthfd2l	0.101563	0.276249	0.09	0.042	1141.67
Gm47283	0.0582584	0.276224	0.506	0.395	708.014
Fkbp2	0.0507735	0.275646	0.476	0.42	625.378
Pick1	0.321345	0.275629	0.114	0.084	2465.68
Ppp1r12c	0.118924	0.275516	0.151	0.092	1311.38
Manea	0.207359	0.275354	0.163	0.118	2048.29
Cdk5rap3	0.0800194	0.275334	0.108	0.05	947.75
Sp4	0.100195	0.275331	0.078	0.034	1127.69
Slitrk6	0.207505	0.274609	0.096	0.059	2049.32
Sec11c	0.275284	0.274577	0.259	0.227	2210.53
Rrbp1	0.107109	0.273698	0.193	0.126	1196.3
Fez1	0.552098	0.273455	0.09	0.076	2434.75
Enpp2	0.0840185	0.273345	0.127	0.067	985.201
Yme1l1	0.22303	0.272998	0.41	0.378	2152.24
Pofut2	0.169998	0.272486	0.157	0.109	1743.33
Gm17227	0.212737	0.272467	0.054	0.025	2089.72
Rps6ka5	0.0687749	0.272006	0.06	0.017	824.68
Rsbn1	0.201996	0.271664	0.096	0.059	2011.08
Tmem47	0.145155	0.27164	0.259	0.202	1538.2
Clstn3	0.0510801	0.270954	0.639	0.58	628.949
Icmt	0.630279	0.270356	0.12	0.109	2395.06
Sigmar1	0.268107	0.270177	0.127	0.092	2162.55
Zmiz2	0.167602	0.269717	0.151	0.101	1721.27
Cox14	0.277537	0.269703	0.181	0.143	2224.74
mt-Nd2	8.81513e-06	0.269494	0.994	0.966	0.122045
Cdc14b	0.10005	0.269248	0.102	0.05	1126.16
Serinc1	0.000781517	0.269011	0.886	0.798	10.7216
Sec23a	0.12067	0.268997	0.108	0.059	1328.7
Insr	0.0987243	0.268892	0.175	0.109	1113.71
Zfp292	0.196482	0.268596	0.127	0.084	1962.26
Pdik1l	0.187258	0.268168	0.078	0.042	1879.51
Eri2	0.0523716	0.268001	0.127	0.059	643.752
Phf3	0.557465	0.267928	0.211	0.202	2443.93
Rps15	0.0670478	0.267883	0.789	0.798	806.115
Arid4b	0.256746	0.267751	0.223	0.185	2092.74
Bud23	0.0680842	0.267604	0.157	0.084	817.215
Cep164	0.0905032	0.267158	0.223	0.151	1048.93
Zfp365	0.0670206	0.267143	0.12	0.059	805.856
Igip	0.526755	0.266848	0.187	0.176	2425.71
Pxylp1	0.185618	0.266678	0.12	0.076	1864.72
Sos2	0.292978	0.266495	0.078	0.05	2323.02
Ppfia3	0.660159	0.266027	0.084	0.076	2359.41
Thsd7a	0.193714	0.26427	0.259	0.21	1936.95
Tmem263	0.0442584	0.264129	0.066	0.017	549.689
Snrnp27	0.172416	0.264108	0.193	0.143	1764.5
Il1rap	0.20719	0.264016	0.247	0.202	2047.45
Armc10	0.127057	0.263954	0.096	0.05	1391.53
Tmx4	0.0251058	0.263806	0.795	0.756	324.066
Epb41l4aos	0.140453	0.263354	0.072	0.034	1512.4
Polr2j	0.0406514	0.263048	0.096	0.034	507.126
Rexo4	0.134079	0.262832	0.084	0.042	1455.03
St8sia3	0.165916	0.262476	0.386	0.353	1707.77
Ifrd1	0.0504251	0.26195	0.078	0.025	621.338
Tle2	0.206766	0.26189	0.193	0.143	2043.89
Sprn	0.489372	0.261862	0.102	0.084	2441.97
Tpd52l1	0.006567	0.261702	0.06	0	88.2342
Srsf3	0.248973	0.261543	0.331	0.303	2052.03
Lgr4	0.600449	0.261512	0.096	0.084	2421.61
Pou2f1	0.149006	0.261053	0.145	0.092	1568.29
Gm16105	0.121941	0.260864	0.151	0.092	1341.23
Tmem33	0.386437	0.260212	0.307	0.303	2693.47
Rpl37a	0.141687	0.259508	0.771	0.723	1522.29
Vma21	0.377239	0.259479	0.319	0.311	2699.9
Luc7l3	0.0384234	0.259409	0.596	0.555	484.673
Lrrc8b	0.107252	0.258563	0.102	0.05	1197.47
Hmx2	0.169025	0.258024	0.102	0.059	1734.2
Cdc7	0.129485	0.257973	0.139	0.084	1414.36
Slc36a4	0.42259	0.257762	0.283	0.277	2312.41
Syt4	0.0567983	0.257722	0.675	0.639	693.564
Pomgnt1	0.146626	0.257231	0.163	0.109	1548.96
Ppp2r2b	0.279515	0.257148	0.163	0.126	2237.52
Ppp1r8	0.0662616	0.257007	0.06	0.017	797.459
Sypl	0.14333	0.256745	0.145	0.092	1522.88
Rps27a	0.111905	0.256473	0.765	0.748	1241.03
Larp4b	0.532815	0.256058	0.157	0.143	2429.1
Abhd16a	0.19369	0.255978	0.223	0.168	1937.09
Hs3st5	0.320773	0.255863	0.151	0.118	2462.9
Foxg1	0.290604	0.255837	0.145	0.109	2307.98
Tmem14a	0.0786186	0.255621	0.151	0.084	932.731
Ccdc88a	0.621114	0.255448	0.325	0.345	2410.54
Uqcrh	0.150967	0.255326	0.398	0.345	1582.89
Ptprg	0.202703	0.255223	0.289	0.252	2016.08
AI504432	0.214334	0.255211	0.271	0.218	2098.33
Emb	0.285364	0.255015	0.265	0.235	2274.64
Nudcd1	0.163469	0.254897	0.102	0.059	1686.18
Bola2	0.233946	0.254421	0.151	0.109	2163.77
5330417C22Rik	0.248108	0.254268	0.259	0.218	2048.87
Gtf2h2	0.0220239	0.254244	0.078	0.017	285.87
Neto2	0.390947	0.253901	0.151	0.126	2662.35
Nucb2	0.155991	0.253898	0.127	0.076	1625.42
Gmip	0.392255	0.253767	0.072	0.05	2666.16
Mpc2	0.499145	0.253761	0.217	0.202	2406.88
Psmd6	0.0412401	0.25368	0.108	0.042	514.058
Prickle2	0.321345	0.253271	0.114	0.084	2465.36
Sdc2	0.493847	0.253105	0.253	0.244	2421.83
mt-Co3	8.61376e-08	0.252885	1	1	0.00119447
Ralyl	0.258518	0.252879	0.139	0.101	2102.01
Ubr1	0.381027	0.252877	0.229	0.21	2701.1
Sfxn1	0.323778	0.252637	0.349	0.336	2471.4
Svip	0.464494	0.252421	0.102	0.084	2406.54
Mras	0.182676	0.252318	0.078	0.042	1837.9
Cyb5b	0.905818	0.2522	0.133	0.143	745.488
Npdc1	0.0117754	0.252179	0.669	0.597	156.189
Nrxn2	0.00385788	0.251822	0.867	0.798	52.2318
Nptxr	0.105841	0.251387	0.494	0.429	1184.05
Rock1	0.274294	0.251176	0.163	0.126	2204.5
Tmem167b	0.371071	0.250985	0.127	0.101	2679.88
Gaa	0.00330245	0.250967	0.88	0.79	44.8506
Pcdh17	0.0025248	0.250869	0.904	0.84	34.3651
Maged1	0.0679518	0.250793	0.783	0.756	815.761
Pcbp4	0.157837	0.250788	0.247	0.193	1639.29
Carf	0.0339223	0.250719	0.205	0.109	432
Tmem161b	0.173027	0.250689	0.12	0.076	1767.64
Rbm25	0.237931	0.250629	0.458	0.437	2184.92
Nop10	0.202535	0.250602	0.271	0.218	2014.82
Lemd3	0.313269	0.250497	0.133	0.101	2444.12
Zcchc17	0.464993	0.250494	0.187	0.168	2408.66
Mzf1	0.0749396	0.250473	0.108	0.05	892.905
Rtn4	0.0906582	0.249838	0.669	0.706	1050.55
Ralbp1	0.281622	0.249809	0.163	0.126	2251.29
P4ha2	0.271601	0.249572	0.06	0.034	2185.58
Naa20	0.15891	0.249417	0.181	0.126	1648.53
Unc5d	0.276693	0.248594	0.482	0.471	2219.08
Map7d1	0.156386	0.248421	0.211	0.151	1627.98
Scnm1	0.0733075	0.24833	0.072	0.025	874.926
Sars	0.286762	0.248254	0.193	0.151	2282.91
Cdk2ap2	0.0764671	0.248203	0.084	0.034	909.194
Dnm1l	0.316232	0.248078	0.259	0.227	2451.75
Cd200	0.0337352	0.247923	0.596	0.546	429.686
Pcsk1n	0.00503351	0.247459	0.958	0.958	67.9071
Suz12	0.160659	0.247113	0.09	0.05	1663.14
6030419C18Rik	0.148392	0.247061	0.06	0.025	1563.91
Bmp3	0.105048	0.24706	0.066	0.025	1176.22
Tbca	0.13592	0.246979	0.289	0.227	1469.98
Tead1	0.359774	0.246882	0.157	0.126	2637.14
Rps27	0.0327701	0.246274	0.892	0.857	418.146
Gatm	0.212737	0.246266	0.054	0.025	2089.51
Eml5	0.235982	0.245903	0.295	0.252	2174.34
Nprl2	0.189663	0.245888	0.108	0.067	1900.23
Rps23	0.0144005	0.245861	0.813	0.773	190.044
Pigu	0.132198	0.245843	0.12	0.067	1438.71
Nrbp2	0.217365	0.245514	0.247	0.202	2116.05
Gm26699	0.0406035	0.245198	0.717	0.605	506.569
A230006K03Rik	0.275179	0.245072	0.09	0.059	2209.96
Tmem30a	0.0174469	0.244497	0.717	0.613	228.921
Nkx2-1	0.107747	0.24418	0.078	0.034	1202.45
Maged2	0.958407	0.243708	0.151	0.16	300.94
Nptx1	0.157015	0.243602	0.211	0.151	1633.11
Fry	0.228223	0.243432	0.337	0.303	2187.74
Rap1b	0.204187	0.243375	0.096	0.059	2029.21
Ier3ip1	0.0382971	0.243171	0.518	0.42	483.118
Rcn2	0.117275	0.243055	0.458	0.387	1295.19
Gabra3	0.306597	0.242877	0.428	0.429	2406.48
Lin7c	0.271302	0.24287	0.108	0.076	2183.44
Dync1li2	0.519418	0.242744	0.211	0.202	2416.85
Il1rapl2	0.0996933	0.242456	0.054	0.017	1122.85
Zfp715	0.163291	0.242387	0.114	0.067	1684.67
Ergic3	0.189021	0.241802	0.367	0.336	1894.75
Pde3b	0.494795	0.241725	0.102	0.084	2410.64
Fndc9	0.4146	0.241354	0.193	0.168	2321.76
Echdc2	0.0996933	0.241336	0.054	0.017	1122.75
Txndc11	0.525876	0.24118	0.181	0.168	2424.29
Mrps5	0.22093	0.241165	0.205	0.16	2140.81
Herpud2	0.366777	0.240541	0.084	0.059	2663.9
Htr2c	0.335496	0.240079	0.343	0.311	2521.26
Armcx2	0.358579	0.239888	0.127	0.101	2631.97
Map3k5	0.0495711	0.239849	0.078	0.025	611.757
Slc30a7	0.0564261	0.239364	0.09	0.034	689.922
Clptm1	0.271626	0.239234	0.337	0.311	2185.5
Polr1d	0.425472	0.239129	0.181	0.16	2317.54
Rps12	0.0442764	0.239102	0.536	0.454	549.868
Cd27	0.593401	0.239028	0.114	0.101	2428.79
Parp11	0.0969067	0.23864	0.102	0.05	1095.92
Hirip3	0.0573052	0.238377	0.114	0.05	697.577
Scamp3	0.101975	0.23835	0.102	0.05	1145.99
Rpl5	0.124977	0.238119	0.361	0.303	1371.49
Edem3	0.184886	0.237969	0.157	0.109	1858.47
A730017C20Rik	0.321395	0.237804	0.277	0.244	2465.42
mt-Atp8	0.321911	0.237134	0.361	0.361	2466.8
Arl6ip6	0.169965	0.23707	0.102	0.059	1743.16
Cfap46	0.0368785	0.23703	0.054	0.008	467.066
C87436	0.317295	0.236676	0.114	0.084	2452.38
Sms	0.283916	0.236634	0.277	0.244	2265.65
Rpl17	0.132587	0.236548	0.855	0.908	1442.42
Impa1	0.300004	0.236516	0.096	0.067	2365.83
Pum1	0.224272	0.236364	0.217	0.176	2161.53
Ivns1abp	0.211849	0.235968	0.127	0.084	2082.48
Gpr61	0.298419	0.235907	0.108	0.076	2358.11
Eps15l1	0.095985	0.235597	0.114	0.059	1087.32
Dennd6b	0.556381	0.235441	0.217	0.21	2441.4
Nagk	0.268883	0.235351	0.349	0.319	2167.19
Abcc5	0.255502	0.235349	0.343	0.319	2085.92
Zdhhc13	0.0662616	0.235063	0.06	0.017	797.393
Mastl	0.0865336	0.23492	0.042	0.008	1011.84
Lztr1	0.471769	0.234621	0.114	0.092	2420.17
Mrpl12	0.544034	0.234228	0.09	0.076	2432.92
Supt5	0.391463	0.234159	0.175	0.151	2664.3
Itgb1	0.129424	0.233942	0.151	0.092	1413.96
Dnm2	0.180731	0.233675	0.09	0.05	1819.42
Gfra1	0.373756	0.233434	0.229	0.202	2689.55
Avpr1a	0.0154364	0.233175	0.048	0	203.375
Gga3	0.710426	0.232909	0.09	0.084	2172.48
Ss18l1	0.383191	0.232721	0.145	0.118	2681.57
Ubald2	0.107576	0.232638	0.066	0.025	1200.66
Det1	0.0154364	0.232501	0.048	0	203.36
Adck5	0.339719	0.232139	0.096	0.067	2542.8
Pisd	0.296825	0.232	0.193	0.151	2347.59
Uqcc2	0.389857	0.23174	0.223	0.193	2660.78
Ints1	0.173504	0.231202	0.09	0.05	1772
Ints2	0.263341	0.231034	0.157	0.118	2131.48
Ptprk	0.250966	0.231028	0.235	0.185	2062.69
Alms1	0.0542815	0.230727	0.09	0.034	665.709
Gm15446	0.267214	0.230705	0.12	0.084	2156.68
Atl2	0.79426	0.230555	0.199	0.202	1618.7
Wdr19	0.0368785	0.23036	0.054	0.008	467.029
Napa	0.446435	0.230353	0.151	0.126	2373.25
Gopc	0.343114	0.230321	0.066	0.042	2558.26
Mtpn	0.279551	0.230094	0.139	0.101	2237.52
Cadm1	0.0165745	0.230001	0.867	0.815	217.839
Cfl2	0.277686	0.22982	0.271	0.227	2225.66
U2af2	0.413129	0.229479	0.127	0.101	2327.98
Dimt1	0.0808929	0.229456	0.096	0.042	956.478
Cog5	0.544693	0.229082	0.181	0.168	2434.23
Rc3h1	0.131486	0.229049	0.139	0.084	1432.28
Prkrip1	0.098843	0.228878	0.09	0.042	1114.55
Mcee	0.311938	0.228691	0.078	0.05	2439.04
P4htm	0.188297	0.228468	0.247	0.193	1888.43
Ficd	0.099415	0.228238	0.102	0.05	1120.21
Pex3	0.105913	0.228207	0.102	0.05	1184.21
Scn9a	0.218674	0.228099	0.416	0.37	2126.6
Fitm2	0.421943	0.22799	0.114	0.092	2310.56
Tbcel	0.23479	0.227985	0.102	0.067	2167.58
Clstn1	0.0276368	0.227828	0.777	0.782	355.022
Fam174a	0.0404406	0.227318	0.566	0.479	508.096
Celf2	0.0921146	0.227301	0.367	0.286	1065.3
Tmsb4x	0.00804839	0.227261	0.789	0.756	107.639
Carnmt1	0.0681394	0.227225	0.06	0.017	817.74
Snx2	0.196676	0.226345	0.078	0.042	1963.81
Fam110b	0.344977	0.225623	0.066	0.042	2566.28
Srrt	0.134318	0.225538	0.205	0.143	1456.55
Zdhhc14	0.614732	0.225447	0.096	0.084	2410.36
Hddc2	0.15679	0.225066	0.127	0.076	1631.09
Slc25a17	0.267236	0.224672	0.139	0.101	2156.6
Snx5	0.158945	0.224535	0.102	0.059	1648.73
Reep5	0.0164855	0.224297	0.765	0.714	216.718
Nms	0.401152	0.224198	0.006	0	2681.7
Cacna1g	0.469273	0.22406	0.139	0.118	2416.75
Ehbp1l1	0.220207	0.223875	0.145	0.101	2134.9
Gpc3	0.157593	0.223831	0.127	0.076	1637.39
Mif	0.774356	0.223822	0.187	0.193	1754.69
Vps16	0.0784378	0.223681	0.12	0.059	930.821
Chd4	0.632183	0.223589	0.151	0.143	2397.24
Phospho2	0.069737	0.223111	0.06	0.017	834.822
Nts	0.76176	0.223062	0.313	0.319	1927.25
Ccdc47	0.260479	0.2228	0.422	0.395	2113
Hist1h1c	0.0377128	0.222748	0.054	0.008	476.69
Actr2	0.457676	0.222591	0.392	0.395	2401.88
Ptbp2	0.165372	0.222228	0.277	0.218	1702.68
Fbxo10	0.557579	0.222178	0.187	0.176	2443.87
Uck1	0.273157	0.221831	0.12	0.084	2196.45
Ralgapa1	0.143155	0.221768	0.241	0.168	1521.31
Pdk1	0.352069	0.221605	0.114	0.084	2601.79
P4ha1	0.198652	0.22158	0.139	0.092	1981.35
Snapc3	0.37952	0.221539	0.157	0.126	2696.87
Cops6	0.304108	0.221425	0.127	0.092	2389.98
Alg1	0.291804	0.22127	0.108	0.076	2315.46
Rev3l	0.447335	0.220995	0.199	0.176	2375.35
Slc7a1	0.17667	0.220939	0.199	0.143	1795.32
D130017N08Rik	0.07764	0.220641	0.072	0.025	921.897
Capza2	0.326036	0.220564	0.181	0.143	2479.83
Ngdn	0.0100604	0.220519	0.054	0	133.883
Per3	0.570059	0.22038	0.301	0.303	2454.67
Vps29	0.483083	0.220277	0.145	0.126	2434.74
Sema4g	0.436397	0.220276	0.145	0.118	2348.25
Tmem130	0.00501442	0.220255	0.958	0.824	67.6595
Rplp2	0.0808127	0.220211	0.699	0.664	955.61
Mus81	0.0372936	0.220012	0.054	0.008	471.765
Mcfd2	0.429629	0.220011	0.343	0.353	2329.45
Phlda1	0.382353	0.22001	0.084	0.059	2679.91
Gnpat	0.449689	0.219973	0.096	0.076	2380.65
Atp1b1	0.0135383	0.219781	0.916	0.882	179.017
Zfr	0.193496	0.219587	0.307	0.252	1935.54
Zdhhc12	0.0865336	0.219317	0.042	0.008	1011.75
Lekr1	0.242129	0.21885	0.114	0.076	2016.93
Chml	0.295433	0.218717	0.127	0.092	2339.54
Smarca5	0.119584	0.218587	0.175	0.109	1318.18
Mtmr9	0.224682	0.218148	0.096	0.059	2164.36
Gnb2	0.262716	0.218106	0.373	0.328	2126.95
Cnnm3	0.128664	0.217848	0.181	0.118	1406.3
Tmem251	0.292986	0.217153	0.127	0.092	2322.79
Ccdc77	0.0865336	0.21687	0.042	0.008	1011.66
Dnal4	0.394426	0.216831	0.09	0.067	2674.21
Herc3	0.438847	0.216474	0.223	0.202	2356.17
Galnt10	0.255139	0.215814	0.072	0.042	2084.74
Dhx57	0.0401693	0.215762	0.096	0.034	504.888
Bcor	0.0468728	0.215411	0.066	0.017	580.473
Brox	0.525597	0.215405	0.108	0.092	2424.05
Daglb	0.37365	0.215182	0.084	0.059	2689.91
Mmp16	0.61884	0.214689	0.096	0.084	2412.24
Acbd3	0.207044	0.214601	0.066	0.034	2046.42
Dcaf13	0.172807	0.214367	0.102	0.059	1767.99
Vcl	0.0154364	0.21427	0.048	0	203.344
Mrps24	0.126138	0.214265	0.169	0.109	1382.47
Snrpb2	0.306488	0.214179	0.108	0.076	2406.24
Cnp	0.0482281	0.214128	0.066	0.017	596.147
Gipc1	0.247345	0.213944	0.084	0.05	2043.56
Magi3	0.239805	0.213872	0.145	0.101	2192.05
mt-Co1	8.92e-05	0.213706	1	0.975	1.23185
Serinc5	0.467697	0.213535	0.096	0.076	2412.85
Trip11	0.628492	0.2131	0.145	0.134	2397.7
Atad1	0.168623	0.213043	0.44	0.395	1730.58
Ppp1r15b	0.616342	0.21254	0.127	0.118	2411.75
AI314180	0.827865	0.212519	0.193	0.202	1130.04
Ewsr1	0.347703	0.212499	0.367	0.345	2579.26
Mrpl33	0.352039	0.212152	0.169	0.134	2601.92
Rnaseh2c	0.146774	0.211995	0.084	0.042	1550.23
Zfp106	0.804081	0.211908	0.163	0.168	1563.13
Hps4	0.387106	0.211805	0.139	0.109	2652.84
Ppp2ca	0.633628	0.211786	0.175	0.168	2386.88
Bcs1l	0.369884	0.211708	0.157	0.126	2676.48
Lrp12	0.528413	0.211623	0.151	0.134	2428.59
Mier3	0.143979	0.211551	0.084	0.042	1528.34
Hdac5	0.207505	0.21139	0.096	0.059	2049.11
Atp6ap1	0.130082	0.211306	0.452	0.395	1419.45
Ptpn4	0.317219	0.211272	0.151	0.118	2452.1
Ttyh2	0.056461	0.211164	0.048	0.008	690.123
Scg3	0.255128	0.211079	0.295	0.252	2084.91
Ttc33	0.366485	0.21101	0.102	0.076	2662.15
Lamp1	0.32958	0.210944	0.446	0.454	2490.96
Plpp3	0.154748	0.210805	0.072	0.034	1614.64
Fstl5	0.316557	0.21037	0.554	0.521	2453.32
Srrm1	0.290688	0.210289	0.41	0.403	2308.36
Ddx3x	0.320707	0.210093	0.301	0.269	2462.71
Slit1	0.513454	0.209883	0.084	0.067	2412.21
Yif1b	0.234151	0.209837	0.084	0.05	2164.96
Lrrtm2	0.316617	0.209817	0.235	0.202	2453.46
Acss3	0.0700606	0.209773	0.06	0.017	838.415
Ppm1l	0.341872	0.209685	0.289	0.261	2552.42
Dhdds	0.558183	0.2096	0.09	0.076	2444.29
Klhl7	0.715539	0.209288	0.265	0.277	2158.78
Rpl10-ps3	0.403833	0.209282	0.072	0.05	2347.89
Gm47512	0.113042	0.209118	0.09	0.042	1252.39
Ncan	0.486981	0.20907	0.169	0.151	2439.77
Polb	0.148706	0.208689	0.289	0.227	1566.47
Trmt10c	0.0874732	0.20863	0.042	0.008	1021.6
Hnrnpu	0.0976807	0.208472	0.494	0.437	1103.79
Lrrc8d	0.31295	0.208356	0.127	0.092	2442.57
Tial1	0.0304811	0.208082	0.572	0.487	389.854
Cyb5a	0.39748	0.208028	0.145	0.118	2677.03
Dpm3	0.23889	0.208018	0.199	0.151	2188.24
Elof1	0.564949	0.208005	0.151	0.134	2452.44
Ube2b	0.0794424	0.207941	0.428	0.353	941.789
Tspan2	0.740843	0.207938	0.145	0.143	2055.1
Vstm2b	0.46878	0.207625	0.169	0.143	2415.15
Rgmb	0.730818	0.207562	0.151	0.151	2124.49
Invs	0.105913	0.207497	0.102	0.05	1184.1
Kctd3	0.265038	0.207394	0.139	0.101	2143.1
Tnfrsf21	0.363757	0.207269	0.373	0.37	2648.88
Tkt	0.368191	0.20693	0.181	0.151	2667.54
Gclc	0.346666	0.20679	0.133	0.101	2574.35
Acsl6	0.13766	0.206686	0.217	0.151	1486.04
Nckap1	0.340462	0.206509	0.295	0.269	2544.28
Ece1	0.43111	0.206356	0.217	0.193	2333.6
Hdac3	0.28047	0.206259	0.235	0.193	2243.48
Papolg	0.149521	0.205969	0.072	0.034	1571.77
Mbip	0.233036	0.205184	0.096	0.059	2158.85
Gm11808	0.140282	0.205167	0.108	0.059	1510.98
Spop	0.389163	0.205139	0.199	0.168	2661.1
Pcdhb22	0.214279	0.205019	0.054	0.025	2098.01
Gpr68	0.375136	0.204442	0.054	0.034	2690.48
Bpnt1	0.505989	0.204438	0.181	0.168	2402.44
St6galnac5	0.997538	0.20421	0.078	0.084	21.9458
Adam12	0.056461	0.203934	0.048	0.008	690.067
Asphd2	0.630205	0.203769	0.145	0.134	2397.93
Ncaph2	0.403955	0.203667	0.12	0.092	2346.17
Cald1	0.085471	0.203623	0.096	0.042	1001.21
Otud4	0.157661	0.203602	0.06	0.025	1637.78
Mpped1	0.354389	0.203409	0.066	0.042	2613.62
Pqlc1	0.368488	0.203105	0.084	0.059	2668.59
Catsperg1	0.0154364	0.203092	0.048	0	203.329
Tmem196	0.398317	0.203042	0.127	0.101	2679.88
Prkcsh	0.448973	0.203017	0.265	0.244	2378.21
Sympk	0.335726	0.202959	0.066	0.042	2522.31
Tmed7	0.119925	0.202956	0.506	0.445	1321.09
Neb	0.210837	0.20265	0.03	0.008	2076.53
Kdm6a	0.134957	0.202607	0.084	0.042	1461.31
Hcn1	0.43315	0.202599	0.241	0.218	2338.14
Ccdc66	0.530125	0.20218	0.127	0.109	2428.5
Glrb	0.280354	0.202154	0.44	0.437	2242.83
Pak7	0.688881	0.201967	0.223	0.218	2250.58
Usmg5	0.556272	0.201961	0.277	0.277	2441.48
Kazn	0.147264	0.201921	0.06	0.025	1554.22
Fdxr	0.144379	0.20191	0.096	0.05	1531.29
Thoc6	0.0154364	0.201889	0.048	0	203.313
Phldb1	0.431387	0.201866	0.09	0.067	2334.23
Ino80d	0.345975	0.201786	0.259	0.227	2570.6
Lonp1	0.295761	0.201785	0.108	0.076	2341.83
Mbtps2	0.26221	0.201291	0.151	0.109	2123.64
Ncln	0.374267	0.201253	0.12	0.092	2687.99
Pcdh20	0.511946	0.201113	0.211	0.193	2412.8
Cdh8	0.268655	0.201096	0.181	0.143	2165.63
Rnf138rt1	0.0237466	0.200829	0.042	0	307.282
1700029J07Rik	0.132855	0.20081	0.036	0.008	1445.06
Srsf7	0.0279199	0.200799	0.458	0.336	358.492
Cul3	0.399784	0.200666	0.127	0.101	2679.35
Ankrd26	0.0987979	0.200641	0.054	0.017	1114.44
Cul7	0.149647	0.200598	0.096	0.05	1572.64
Rab28	0.155595	0.200333	0.145	0.092	1622.39
Tmem121	0.417025	0.20026	0.145	0.118	2320.33
Comt	0.723906	0.200239	0.265	0.277	2147.11
Ptpn1	0.507384	0.200179	0.084	0.067	2405
Anapc10	0.0687749	0.200165	0.06	0.017	824.611
Dpy19l1	0.278042	0.200075	0.223	0.176	2227.95
Lrp10	0.0753256	0.199992	0.084	0.034	896.902
Gpx4	0.136279	0.19985	0.488	0.437	1473.45
Eif2d	0.247856	0.199797	0.114	0.076	2047.04
Itfg1	0.24272	0.199789	0.596	0.605	2020.88
Sema3e	0.383881	0.199734	0.054	0.034	2685.25
Ddc	0.129437	0.199692	0.108	0.059	1413.97
Prdx1	0.628899	0.199572	0.175	0.168	2396.73
Wfs1	0.786923	0.199223	0.223	0.227	1655.69
Kcnh7	0.248807	0.199191	0.151	0.109	2050.91
Mapk3	0.415306	0.199021	0.09	0.067	2314.09
Ptpn12	0.425987	0.198959	0.09	0.067	2318.22
Rad1	0.0570863	0.198912	0.048	0.008	695.54
Rps6ka3	0.343114	0.198903	0.066	0.042	2557.91
Cc2d1b	0.310328	0.19874	0.078	0.05	2429.86
Pkn2	0.33232	0.198687	0.223	0.185	2505.36
Shisa5	0.336384	0.19865	0.175	0.143	2525.91
Ndufc1	0.17588	0.198569	0.253	0.193	1788.35
Ly6h	0.00385163	0.198563	0.946	0.882	52.1511
Ccdc166	0.0583542	0.198526	0.048	0.008	709.062
Dmtf1	0.837701	0.198522	0.193	0.202	1083.15
Zim1	0.214188	0.198439	0.205	0.151	2097.33
Ndrg2	0.568399	0.198431	0.09	0.076	2453.78
Aplp1	0.0689865	0.198379	0.777	0.756	826.872
Mxra7	0.534697	0.198376	0.108	0.092	2432.87
Dzip3	0.586836	0.198374	0.398	0.429	2439.48
Slc30a9	0.125136	0.198337	0.373	0.294	1373.12
Copb1	0.838675	0.198237	0.108	0.109	1080.21
Ipo13	0.407738	0.198218	0.072	0.05	2340.82
Fam20b	0.44526	0.198199	0.277	0.261	2372.35
Hmgn3	0.231194	0.198186	0.38	0.336	2202.58
Bcam	0.150565	0.19797	0.084	0.042	1579.88
Ahr	0.578456	0.197968	0.036	0.025	2444.56
Ssr2	0.314813	0.197901	0.199	0.16	2452.71
Pdia6	0.36814	0.197872	0.367	0.345	2668.65
Rpl23a	0.0384826	0.19783	0.837	0.765	485.227
Prpf4b	0.400589	0.197536	0.319	0.311	2682.75
Armcx3	0.670371	0.197446	0.175	0.168	2344.29
Kirrel3	0.110152	0.197227	0.066	0.025	1224.34
mt-Nd5	0.02838	0.197166	0.813	0.723	364.03
Hsp90b1	0.119756	0.197018	0.62	0.597	1319.84
Ranbp1	0.31505	0.196977	0.181	0.143	2453.61
Mapkapk2	0.0237466	0.196976	0.042	0	307.258
Hsd17b11	0.147888	0.196966	0.048	0.017	1559.19
Emc1	0.32565	0.196892	0.367	0.353	2477.87
Dennd5a	0.789925	0.196806	0.127	0.126	1643.04
Zcchc11	0.250422	0.19674	0.337	0.294	2059.47
Chl1	0.346065	0.196627	0.518	0.496	2570.92
Pank2	0.114922	0.196557	0.078	0.034	1270.58
Klc1	0.521989	0.196367	0.259	0.252	2419.94
Flywch2	0.371925	0.196264	0.084	0.059	2680.46
Tmem256	0.457594	0.196167	0.199	0.176	2402.37
4933427D14Rik	0.484454	0.196152	0.133	0.109	2435.83
Tac1	0.662384	0.195988	0.024	0.017	2362.06
Ddx41	0.146995	0.195922	0.096	0.05	1552.12
Psip1	0.422725	0.195832	0.217	0.193	2312.73
Zfp800	0.592582	0.195586	0.054	0.042	2432.55
Ndufs7	0.462267	0.195529	0.235	0.21	2406.56
Zfp202	0.0903415	0.195527	0.042	0.008	1047.42
Tbc1d24	0.877244	0.195429	0.187	0.202	914.089
Fbrsl1	0.303782	0.19542	0.108	0.076	2388.03
Gls	0.236628	0.195134	0.44	0.395	2177.45
Mrpl28	0.276724	0.195049	0.06	0.034	2219.05
Stk19	0.269379	0.194879	0.175	0.134	2170.65
Alg13	0.316885	0.19471	0.036	0.017	2453.01
Carmil3	0.224907	0.194449	0.295	0.244	2166.08
Yipf4	0.862999	0.194421	0.217	0.235	964.832
Mul1	0.0746528	0.194408	0.133	0.067	889.787
Bach1	0.0366761	0.194176	0.036	0	465.126
Magel2	0.788004	0.194127	0.211	0.21	1657.17
Hnmt	0.146142	0.194113	0.06	0.025	1545.16
Dynlt3	0.124618	0.193818	0.133	0.076	1367.93
Top1	0.76176	0.193755	0.307	0.328	1928.01
Rpl35a	0.0984889	0.193612	0.753	0.739	1111.35
Pwwp2a	0.258034	0.193596	0.151	0.109	2099.88
Mapk15	0.153692	0.193458	0.072	0.034	1605.92
Hspb11	0.43366	0.193419	0.072	0.05	2339.16
Gabrg1	0.303557	0.19317	0.41	0.37	2387.18
Tm9sf2	0.360218	0.193067	0.38	0.361	2636.07
Tob1	0.736606	0.193054	0.114	0.109	2100.8
Tmem106b	0.38763	0.192815	0.482	0.496	2654.88
Mphosph6	0.0843073	0.1928	0.096	0.042	988.503
Opn3	0.50025	0.192765	0.102	0.084	2409.7
Hexa	0.284123	0.192707	0.139	0.101	2266.73
Rps20	0.513615	0.192688	0.5	0.538	2411.42
2610001J05Rik	0.860369	0.192656	0.163	0.168	973.938
Nadk	0.589894	0.19261	0.054	0.042	2435.08
Pomgnt2	0.405837	0.192587	0.169	0.143	2346.96
Ehd3	0.514847	0.192571	0.048	0.034	2412.57
Cadm2	0.30941	0.192552	0.349	0.319	2424.23
Cggbp1	0.365071	0.19248	0.084	0.059	2655.16
Mrpl42	0.318779	0.19248	0.139	0.101	2460.33
Tmem243	0.368061	0.192248	0.524	0.504	2669.18
Mbd6	0.272267	0.192189	0.181	0.134	2190.12
Cnksr2	0.146142	0.192091	0.06	0.025	1545.01
Fermt2	0.214403	0.192035	0.108	0.067	2098.79
Nin	0.649228	0.191962	0.06	0.05	2382.02
Rpl32	0.107341	0.191787	0.711	0.664	1198.25
Rbm10	0.398018	0.191748	0.072	0.05	2680.26
Adam10	0.303407	0.191409	0.313	0.286	2386.29
Rybp	0.449689	0.191338	0.096	0.076	2380.2
Odf2l	0.223933	0.191262	0.127	0.084	2158.93
Rnf130	0.275009	0.191169	0.06	0.034	2209.15
Klf16	0.0237466	0.19102	0.042	0	307.234
Snapc5	0.423579	0.190913	0.072	0.05	2316.13
P3h1	0.0154364	0.190887	0.048	0	203.298
Pcnx4	0.378866	0.19076	0.163	0.134	2694.87
Clu	0.906266	0.19036	0.313	0.37	744.044
Clasrp	0.0749039	0.19034	0.325	0.227	892.555
Cdh24	0.243469	0.190333	0.072	0.042	2022.01
Cisd1	0.229705	0.190221	0.518	0.479	2195.06
Enah	0.993115	0.190217	0.464	0.513	43.697
Qrich1	0.378997	0.190199	0.181	0.151	2695.42
Rpl18	0.170186	0.189857	0.404	0.336	1745.09
Sdhaf3	0.0381359	0.189593	0.054	0.008	481.313
Ndufa1	0.442566	0.189326	0.416	0.429	2368.17
Fam50a	0.214403	0.189325	0.108	0.067	2098.58
Fktn	0.609774	0.189281	0.145	0.134	2410.44
Phf14	0.745709	0.189256	0.175	0.176	2014.16
Sirt3	0.821697	0.189166	0.175	0.176	1161.06
Mesd	0.83991	0.188889	0.337	0.378	1070.05
Farsb	0.239137	0.188852	0.096	0.059	2187.39
Mad2l2	0.368488	0.18881	0.084	0.059	2668.22
Rpl10a	0.0806368	0.188683	0.608	0.563	953.772
Kcnj3	0.238715	0.188649	0.235	0.193	2187.58
Polr2k	0.387456	0.188256	0.12	0.092	2654.08
Zscan20	0.0569865	0.18819	0.03	0	695.748
Cyp4x1	0.392255	0.188176	0.072	0.05	2665.76
Ogfod3	0.0368785	0.187968	0.054	0.008	466.992
Rnf150	0.204866	0.18791	0.108	0.067	2030.84
Plppr3	0.271058	0.187804	0.386	0.353	2182.83
Zfp664	0.328497	0.187797	0.127	0.092	2486.07
Cetn3	0.328365	0.187737	0.217	0.176	2489.99
Gm21887	0.261118	0.187529	0.072	0.042	2116.88
Topors	0.220526	0.187516	0.054	0.025	2137.56
Ltbp3	0.339866	0.187353	0.157	0.118	2543.56
Nudt11	0.74612	0.187245	0.09	0.084	2013.78
Ndufs2	0.465872	0.187232	0.157	0.134	2411.82
Shisa2	0.47818	0.187033	0.078	0.059	2425.33
Commd9	0.280176	0.186947	0.06	0.034	2241.97
Ptp4a1	0.861485	0.186771	0.175	0.185	970.032
Tmem107	0.108604	0.186741	0.102	0.05	1209.85
AI987944	0.728291	0.186594	0.066	0.059	2143.36
Hmgb3	0.0865336	0.186555	0.042	0.008	1011.58
Gpc1	0.906717	0.186461	0.157	0.168	738.068
Slc2a13	0.273901	0.186413	0.271	0.227	2201.89
Taf4	0.217386	0.186402	0.054	0.025	2116.04
Stau1	0.199083	0.186334	0.078	0.042	1985.46
Fam120a	0.294594	0.186282	0.139	0.101	2333.48
Atp13a3	0.872312	0.186265	0.169	0.176	938.607
Aph1b	0.666947	0.18626	0.102	0.092	2342.98
Sppl3	0.554033	0.186177	0.343	0.353	2435.53
H2-T22	0.218952	0.186028	0.054	0.025	2128.43
Ado	0.222108	0.185737	0.054	0.025	2145.78
Ubxn6	0.438396	0.185576	0.157	0.126	2354.63
Ctsz	0.427782	0.185502	0.09	0.067	2325
Eno2	0.940155	0.185444	0.229	0.252	468.197
Rcn1	0.452324	0.185196	0.253	0.227	2387.82
Cpne5	0.307115	0.185134	0.096	0.067	2409.93
Sh2d5	0.620899	0.185062	0.096	0.084	2410.33
Rpl36a	0.285528	0.184974	0.506	0.504	2275.09
Cox5b	0.336664	0.184972	0.325	0.303	2527.68
Serp1	0.275009	0.184868	0.06	0.034	2209.42
Mllt6	0.281628	0.184867	0.12	0.084	2251.05
Spred3	0.52045	0.184825	0.066	0.05	2415.93
Taf1c	0.0237466	0.184776	0.042	0	307.21
Ccnd3	0.0996933	0.184435	0.054	0.017	1122.65
Npy5r	0.0770431	0.184426	0.084	0.034	915.735
Sf3b5	0.108429	0.184108	0.066	0.025	1208.34
Dctn5	0.0300763	0.184105	0.09	0.025	384.826
Phlpp2	0.489319	0.18404	0.157	0.134	2443.66
Ero1l	0.85836	0.183922	0.145	0.151	993.123
Arl6	0.200295	0.183894	0.078	0.042	1995.94
Sem1	0.238239	0.183758	0.44	0.395	2187.27
Ift27	0.106143	0.183694	0.054	0.017	1186.58
Zc3h13	0.990474	0.183526	0.139	0.151	59.4284
Ensa	0.244781	0.183505	0.151	0.109	2028.26
Crlf2	0.627072	0.183421	0.078	0.067	2396.04
Nat8f4	0.0893771	0.183328	0.042	0.008	1037.22
Med25	0.445268	0.183297	0.108	0.084	2371.94
Faf1	0.265665	0.183224	0.072	0.042	2146.31
Tmed4	0.365587	0.183095	0.343	0.328	2657.81
Hyou1	0.315262	0.183081	0.187	0.151	2454.63
Pnrc2	0.491693	0.182821	0.096	0.076	2417.66
Zdhhc2	0.591134	0.182779	0.265	0.261	2433.11
Kdm5a	0.482545	0.182753	0.193	0.168	2432.99
Cldn1	0.056461	0.182632	0.048	0.008	690.01
Cog7	0.110081	0.182615	0.09	0.042	1223.99
Casd1	0.439917	0.182562	0.271	0.244	2360.16
Cxcl14	0.0913142	0.182527	0.042	0.008	1057.24
Anapc4	0.331301	0.18237	0.163	0.126	2500.66
Rabl6	0.697813	0.181868	0.193	0.193	2209.28
Tomm34	0.420574	0.181864	0.145	0.118	2311.05
Elp2	0.996818	0.181824	0.108	0.118	24.9204
Fxyd2	0.297872	0.181773	0.06	0.034	2354.08
Palld	0.668679	0.181758	0.042	0.034	2343.72
Ids	0.51266	0.181743	0.416	0.412	2408.99
L2hgdh	0.415306	0.181672	0.09	0.067	2313.67
Mydgf	0.385082	0.181523	0.205	0.168	2687.1
Atraid	0.689687	0.18136	0.295	0.311	2249.76
B230307C23Rik	0.146612	0.181281	0.048	0.017	1548.96
Slc12a2	0.408364	0.181275	0.199	0.168	2342.37
Ikbkap	0.527764	0.181136	0.084	0.067	2426.66
Gemin2	0.0237466	0.181094	0.042	0	307.187
Timm13	0.726295	0.181039	0.181	0.176	2145.48
Ubr2	0.334858	0.18094	0.133	0.101	2518.47
Tspan7	0.0648039	0.180826	0.753	0.689	781.211
Smc3	0.577554	0.180712	0.108	0.092	2444.78
Edil3	0.284378	0.180694	0.416	0.395	2267.91
Zfp961	0.0987979	0.180618	0.054	0.017	1114.34
Dctn2	0.84259	0.18005	0.133	0.134	1049.87
Ostm1	0.371783	0.180034	0.193	0.16	2682.04
Sec61g	0.818214	0.179754	0.277	0.294	1389.33
Dnajc15	0.840864	0.179749	0.181	0.193	1067.9
Syne4	0.0602997	0.179748	0.048	0.008	730.833
Kdm3a	0.115742	0.179633	0.078	0.034	1278.72
Ndufb6	0.480269	0.17962	0.175	0.151	2428.72
Hdac7	0.4467	0.179592	0.265	0.244	2373.32
Nlk	0.565509	0.179549	0.072	0.059	2451.48
Atp5k	0.471131	0.179227	0.331	0.319	2418.78
St3gal5	0.813474	0.17905	0.108	0.109	1401.62
Usp54	0.0570863	0.17867	0.048	0.008	695.483
Zfp944	0.259614	0.178641	0.072	0.042	2108.07
Tmem43	0.924336	0.178544	0.127	0.143	602.667
Gm10269	0.0569871	0.17844	0.03	0	695.698
Eef1akmt2	0.600195	0.178293	0.072	0.059	2421.19
Plekha3	0.475395	0.178254	0.06	0.042	2421.66
Necab2	0.149173	0.178186	0.048	0.017	1569.45
Rps7	0.184571	0.178148	0.633	0.639	1855.68
Rnf13	0.544374	0.178036	0.145	0.126	2433.9
March6	0.386803	0.178009	0.578	0.63	2651.54
Coq6	0.207044	0.177811	0.066	0.034	2046.22
Rnf41	0.817655	0.177678	0.102	0.101	1390.01
Map4k5	0.374267	0.177619	0.12	0.092	2687.61
Trf	0.056461	0.177493	0.048	0.008	689.954
Rps6kb2	0.44722	0.177472	0.169	0.143	2375.63
Ly6e	0.74853	0.177449	0.313	0.328	2010.55
Stx4a	0.626556	0.177419	0.12	0.109	2400.34
Acad8	0.204495	0.177351	0.03	0.008	2031.86
Nr1d2	0.545502	0.177308	0.127	0.109	2429.66
Insig2	0.926312	0.177152	0.265	0.311	596.545
Ninl	0.417064	0.177129	0.042	0.025	2320.13
Yae1d1	0.706378	0.177025	0.102	0.092	2179.18
Ppp1r17	0.0596453	0.176998	0.048	0.008	723.259
Adam19	0.417064	0.176957	0.042	0.025	2319.71
Msantd4	0.949972	0.176912	0.072	0.076	383.789
Eef1akmt1	0.504093	0.176899	0.048	0.034	2402.51
Rpl22	0.63154	0.176768	0.223	0.21	2396.06
Txlna	0.301704	0.176765	0.048	0.025	2375.92
Smap1	0.459996	0.176576	0.078	0.059	2402.56
Resp18	0.128148	0.176571	0.657	0.655	1402.2
Kcnj9	0.755594	0.176544	0.139	0.168	1943.39
Hint1	0.258629	0.176493	0.38	0.345	2102.66
Ddx28	0.089367	0.176391	0.024	0	1041.04
Gns	0.296422	0.17637	0.331	0.286	2346.18
Map9	0.257772	0.17631	0.102	0.067	2098.78
Aldh7a1	0.145247	0.176307	0.096	0.05	1538.89
Tspan6	0.339006	0.176061	0.163	0.126	2538.81
Pdcd11	0.442597	0.176034	0.096	0.076	2367.89
Socs2	0.223159	0.176009	0.193	0.143	2153.04
Gnpda2	0.35629	0.175926	0.066	0.042	2621.94
Ptprr	0.117674	0.175683	0.157	0.092	1299.01
Mrpl1	0.143979	0.175593	0.084	0.042	1528.48
Bloc1s2	0.465892	0.175558	0.114	0.092	2411.46
Setd1b	0.201673	0.175372	0.066	0.034	2008.46
Cpt1c	0.463484	0.175321	0.253	0.227	2407.8
Hace1	0.334858	0.175225	0.133	0.101	2518.13
Nelfa	0.9175	0.175195	0.09	0.092	679.867
Ptbp1	0.149173	0.175191	0.048	0.017	1569.3
Tmem163	0.258117	0.175146	0.072	0.042	2100.3
Isyna1	0.381213	0.175107	0.187	0.151	2702.04
Tssc4	0.336063	0.175104	0.145	0.109	2524.51
Zfand4	0.216324	0.174866	0.042	0.017	2110.68
Zfp93	0.285408	0.174805	0.06	0.034	2274.7
Ints3	0.498881	0.174688	0.139	0.118	2416.58
Igsf8	0.618895	0.174684	0.295	0.294	2411.83
Gpr37l1	0.0569871	0.174664	0.03	0	695.641
Chga	0.717018	0.174578	0.217	0.218	2153.92
Rnf25	0.320629	0.174445	0.145	0.109	2463.07
Zfp219	0.216692	0.17442	0.066	0.034	2112.75
Rad9b	0.520793	0.174376	0.12	0.101	2416.48
Alg6	0.235447	0.174355	0.084	0.05	2172.24
Ccdc28b	0.803764	0.174219	0.072	0.067	1566.54
Brs3	0.798381	0.173925	0.09	0.084	1592.77
Usp30	0.40248	0.173822	0.133	0.109	2354.91
Atp9a	0.144805	0.17351	0.482	0.42	1534.79
Wdr24	0.204495	0.173356	0.03	0.008	2031.66
Ppp4r3a	0.245554	0.173246	0.114	0.076	2033.43
Khdrbs1	0.509403	0.173241	0.084	0.067	2408.46
Rps19bp1	0.285408	0.173122	0.06	0.034	2274.42
Etv1	0.0589968	0.173036	0.048	0.008	716.28
Rpgrip1	0.919686	0.172937	0.151	0.16	671.371
Celsr3	0.874405	0.172923	0.139	0.143	924.246
Rxfp3	0.112777	0.172887	0.066	0.025	1249.91
Nelfcd	0.384109	0.172824	0.084	0.059	2686.07
Erp29	0.0838253	0.172792	0.41	0.336	983.103
Slc5a3	0.561563	0.172778	0.223	0.21	2448.42
Ncapd2	0.0364613	0.172637	0.072	0.017	462.548
Tusc3	0.72975	0.17259	0.325	0.353	2129.41
H2-Ke6	0.205758	0.172575	0.12	0.076	2038.44
Osbpl8	0.454624	0.172256	0.133	0.109	2394.96
2300009A05Rik	0.26163	0.172119	0.253	0.21	2119.98
Rps29	0.059608	0.172012	0.898	0.924	722.866
Hpf1	0.633383	0.171947	0.169	0.16	2391.66
Fhl1	0.957357	0.171565	0.157	0.168	307.312
Fbxo17	0.0903415	0.171484	0.042	0.008	1047.33
Ebag9	0.231205	0.171304	0.127	0.084	2202.45
Tmem170	0.216324	0.171276	0.042	0.017	2110.46
AC149090.1	0.316676	0.171108	0.639	0.672	2453.6
Snrpd1	0.510488	0.170805	0.12	0.101	2410.53
Ergic1	0.721278	0.170761	0.343	0.353	2147.24
1700052K11Rik	0.089367	0.170608	0.024	0	1040.95
Sbk1	0.105202	0.170356	0.054	0.017	1177.63
Romo1	0.312358	0.170311	0.193	0.151	2440.46
Rpl26	0.170201	0.170272	0.789	0.765	1745.08
Dhcr7	0.405476	0.170211	0.12	0.092	2349.73
Zfp1	0.536709	0.17021	0.066	0.05	2432.36
Cthrc1	0.11545	0.170171	0.066	0.025	1275.96
Ccl27a	0.344009	0.170109	0.277	0.235	2561.15
Nom1	0.154748	0.170077	0.072	0.034	1614.49
Zfp827	0.132855	0.170061	0.036	0.008	1444.93
Zfp120	0.252765	0.170046	0.084	0.05	2072.17
Zfp641	0.3883	0.16997	0.054	0.034	2657.13
Gm2a	0.431387	0.169921	0.09	0.067	2333.8
Xpo1	0.91813	0.169876	0.181	0.185	677.58
Alyref	0.0865336	0.169857	0.042	0.008	1011.49
Nup85	0.119911	0.169797	0.078	0.034	1321.06
Naa15	0.975235	0.169779	0.139	0.151	163.839
Sgsm3	0.313841	0.169696	0.139	0.101	2447.96
Tmem70	0.400796	0.169658	0.163	0.134	2680.52
Chmp6	0.570077	0.169598	0.072	0.059	2454.18
Pdyn	0.0595465	0.169421	0.09	0.034	722.418
Tspan4	0.109288	0.169408	0.066	0.025	1216.81
Ints4	0.316885	0.169174	0.036	0.017	2452.69
Mcts1	0.518081	0.169143	0.139	0.118	2417.37
Sdhaf2	0.608827	0.169133	0.054	0.042	2412.78
Eif2b4	0.375381	0.169017	0.084	0.059	2689.61
Chchd10	0.485134	0.168901	0.271	0.252	2437.8
Lmbr1	0.749292	0.168803	0.139	0.134	2006.6
Lrrc58	0.701407	0.168778	0.169	0.168	2187.69
Ltbp4	0.203825	0.168763	0.108	0.067	2026.03
Rnf181	0.474105	0.168672	0.078	0.059	2418.89
Wscd2	0.347824	0.168631	0.217	0.176	2579.47
Rab39b	0.558508	0.168619	0.151	0.134	2445.15
Slc39a7	0.893296	0.168586	0.175	0.185	814.686
Rpl37	0.197936	0.168585	0.831	0.815	1975.01
Hcfc2	0.379493	0.168515	0.054	0.034	2697.06
Slc17a5	0.490204	0.168222	0.12	0.101	2412.78
Chst10	0.729655	0.168117	0.145	0.176	2130.59
Cmtr1	0.423704	0.168009	0.108	0.084	2316.39
Hid1	0.903619	0.167815	0.09	0.092	756.329
Bicd1	0.595837	0.16781	0.422	0.454	2423.27
Adarb2	0.206132	0.167706	0.217	0.16	2041.12
Ndn	0.6879	0.167555	0.392	0.37	2268.01
Hsd17b12	0.282559	0.167548	0.229	0.185	2256.51
Amt	0.710033	0.167518	0.084	0.076	2173.41
Inafm1	0.626496	0.167269	0.175	0.218	2401.36
Zfat	0.0366761	0.167257	0.036	0	465.089
Selenof	0.147374	0.167094	0.47	0.412	1555.24
Tmem127	0.802261	0.167052	0.151	0.151	1567.62
Rhou	0.0237466	0.166971	0.042	0	307.163
Cadm4	0.340759	0.16689	0.386	0.361	2546.15
Lrp11	0.447268	0.16679	0.307	0.294	2375.44
Manf	0.430647	0.16659	0.38	0.361	2331.53
Rmnd5a	0.267193	0.166496	0.072	0.042	2156.78
Ccdc127	0.782763	0.166477	0.12	0.118	1669.63
Fth1	0.39375	0.166409	0.904	0.933	2671.2
C1galt1	0.0237466	0.166387	0.042	0	307.139
Rab8a	0.68451	0.166334	0.108	0.101	2277.37
Morn2	0.832952	0.166215	0.054	0.05	1097
Gm49179	0.11545	0.166202	0.066	0.025	1275.84
P3h4	0.647747	0.166115	0.078	0.067	2389.54
Snx7	0.0366761	0.166093	0.036	0	465.052
Man1a2	0.643872	0.165982	0.247	0.303	2390.05
Ist1	0.812144	0.165944	0.157	0.16	1526.83
Orc5	0.386086	0.165904	0.054	0.034	2692.18
Timm44	0.331091	0.165654	0.271	0.227	2499.74
B4gat1	0.425755	0.165519	0.259	0.235	2318.24
Cep104	0.504093	0.165396	0.048	0.034	2402.01
Ift80	0.114554	0.165351	0.066	0.025	1266.96
Ndufc2	0.413699	0.165312	0.319	0.277	2329.95
mt-Cytb	0.00372882	0.165248	1	0.992	50.5181
Kcnk3	0.876781	0.165163	0.108	0.109	917.99
Naaa	0.576436	0.165087	0.169	0.151	2445.24
Rap1a	0.380603	0.165073	0.084	0.059	2699.62
Atp1a1	0.385468	0.165021	0.355	0.336	2688.64
Fam133b	0.300669	0.164908	0.223	0.176	2370.18
Lactb2	0.297635	0.1649	0.048	0.025	2353.1
Hsf4	0.299665	0.164872	0.048	0.025	2364.96
Hnrnpa2b1	0.265646	0.164479	0.639	0.63	2146.42
Arf4	0.444596	0.164351	0.325	0.311	2371.92
2810021J22Rik	0.581864	0.164307	0.054	0.042	2436.85
Erlec1	0.471311	0.164125	0.151	0.126	2418.77
Cbfa2t3	0.0913142	0.163978	0.042	0.008	1057.14
Donson	0.504449	0.163939	0.066	0.05	2402.19
Mief2	0.222108	0.163937	0.054	0.025	2145.56
Nemf	0.667215	0.163759	0.241	0.235	2343.26
Tada3	0.316801	0.163717	0.078	0.05	2453.63
Dlx1	0.286553	0.163511	0.235	0.185	2281.82
Xpo5	0.0569871	0.163489	0.03	0	695.584
Msl2	0.252186	0.163436	0.072	0.042	2068.68
Ifngr1	0.132855	0.163169	0.036	0.008	1444.79
Rpl12	0.717164	0.162995	0.458	0.513	2153.64
Cop1	0.239175	0.162985	0.157	0.109	2187.49
Vdac1	0.719324	0.16294	0.145	0.176	2147.9
Cpsf6	0.531135	0.16287	0.283	0.261	2430.47
Slc22a17	0.0874989	0.162835	0.813	0.79	1021.72
Otud7b	0.287167	0.162833	0.06	0.034	2284.7
Caly	0.228934	0.162754	0.645	0.605	2190.44
Zdhhc23	0.575171	0.162547	0.036	0.025	2451.38
Xrn1	0.820423	0.162433	0.187	0.193	1382.41
Mgat5	0.774557	0.162385	0.247	0.261	1752.82
Lrrn2	0.372251	0.162285	0.259	0.227	2681.7
Mrgpre	0.531542	0.162082	0.151	0.134	2428.08
Wdr53	0.0569871	0.161984	0.03	0	695.527
Nbdy	0.463917	0.161907	0.151	0.126	2409.12
Smg1	0.597866	0.161885	0.235	0.227	2421.96
9330160F10Rik	0.158406	0.161876	0.048	0.017	1644.09
Gm9803	0.10334	0.161804	0.054	0.017	1159.88
Rnf217	0.0865336	0.161741	0.042	0.008	1011.4
Sucla2	0.389338	0.161679	0.133	0.101	2660.74
C130071C03Rik	0.149173	0.161557	0.048	0.017	1569.15
Esd	0.679508	0.161554	0.12	0.109	2296.74
Rpl18a	0.186651	0.161447	0.693	0.714	1873.97
Ociad2	0.202258	0.161383	0.151	0.101	2012.87
Lmbrd2	0.468586	0.161312	0.319	0.311	2415.09
Acads	0.223559	0.161205	0.042	0.017	2156.01
Atp11c	0.29783	0.161102	0.12	0.084	2354.05
mt-Nd4	0.00707517	0.160818	1	0.975	94.9558
2010111I01Rik	0.520268	0.160817	0.048	0.034	2418.21
Csgalnact1	0.470749	0.160689	0.06	0.042	2418.24
Htra1	0.218117	0.160541	0.042	0.017	2122.06
Dgke	0.467262	0.160536	0.283	0.269	2412.47
BC029722	0.881416	0.16047	0.223	0.261	884.942
Tmem87b	0.543669	0.160423	0.199	0.185	2434.01
Recql5	0.225217	0.160347	0.066	0.034	2168.84
Sema6d	0.956219	0.160266	0.127	0.134	308.859
Uhrf1bp1l	0.582849	0.16009	0.133	0.118	2439.22
H2afv	0.763204	0.16009	0.139	0.134	1924.8
Cstf3	0.393135	0.160036	0.307	0.286	2670.96
Fbxl21	0.132855	0.159994	0.036	0.008	1444.66
Pea15a	0.650269	0.15997	0.277	0.286	2381.29
Selenop	0.218952	0.159853	0.054	0.025	2128.21
Klhl22	0.430604	0.159805	0.145	0.118	2331.72
Tcta	0.264394	0.159723	0.114	0.076	2138.42
Ulk3	0.149173	0.15955	0.048	0.017	1569
Aldh5a1	0.460886	0.159479	0.114	0.092	2403.06
Gas2	0.316885	0.159403	0.036	0.017	2452.38
Kat2b	0.422332	0.159325	0.042	0.025	2312.27
Bclaf3	0.831659	0.159283	0.078	0.076	1107.77
P2ry14	0.266677	0.159264	0.084	0.05	2153.15
H2afz	0.744538	0.159166	0.373	0.403	2051.2
Il6st	0.701264	0.159145	0.157	0.151	2191.45
Rgs16	0.134262	0.159058	0.036	0.008	1456.74
Rnf8	0.348722	0.158984	0.066	0.042	2584.03
Ube2g1	0.0915983	0.158975	0.108	0.05	1060.16
Ggh	0.252765	0.158974	0.084	0.05	2071.92
Celf3	0.353211	0.158659	0.392	0.361	2607.4
Ddit4	0.307878	0.158543	0.048	0.025	2415.61
D230025D16Rik	0.643105	0.158539	0.078	0.101	2389.78
Fau	0.25206	0.158424	0.825	0.807	2068.91
Vps72	0.204495	0.158384	0.03	0.008	2031.45
Mapk14	0.466014	0.158375	0.078	0.059	2411.16
Dnajb12	0.841499	0.158252	0.078	0.076	1064.5
Btbd11	0.228764	0.158089	0.163	0.118	2189.04
Ears2	0.149173	0.158061	0.048	0.017	1568.85
Cinp	0.0569871	0.15796	0.03	0	695.47
Zfp574	0.419693	0.157914	0.042	0.025	2309.15
Unk	0.11095	0.157851	0.054	0.017	1231.99
Kcnk9	0.367389	0.157737	0.247	0.202	2666.14
Gsk3a	0.532948	0.157633	0.12	0.101	2429.18
Ptgds	0.162457	0.15741	0.06	0.025	1677.53
Morf4l1	0.486895	0.157079	0.464	0.445	2439.83
Tmem185a	0.687212	0.157074	0.12	0.109	2267.8
Sacm1l	0.826007	0.157029	0.205	0.218	1138.24
Cldn11	0.0903415	0.156966	0.042	0.008	1047.24
Fam98c	0.862983	0.156917	0.102	0.118	965.678
P2ry1	0.150466	0.156906	0.048	0.017	1579.29
Cherp	0.477688	0.156902	0.114	0.092	2424.26
Huwe1	0.359718	0.156853	0.56	0.546	2638.18
Med15	0.472798	0.156739	0.151	0.126	2424.04
Tmub1	0.215295	0.15662	0.066	0.034	2101.71
Sned1	0.223698	0.156431	0.054	0.025	2156.89
Gnai2	0.632722	0.156366	0.361	0.361	2395.49
Tmem231	0.74062	0.156284	0.114	0.109	2055.22
Cstb	0.104268	0.156273	0.054	0.017	1169.67
Slit2	0.650025	0.156193	0.096	0.084	2381.69
Rnf103	0.662299	0.156071	0.12	0.109	2363.74
Utp18	0.221734	0.155995	0.042	0.017	2143.51
Zfhx4	0.694493	0.155988	0.187	0.176	2230.02
Fam227a	0.486386	0.155898	0.078	0.059	2441.17
Chd2	0.782692	0.155801	0.145	0.143	1671.05
B4galt3	0.374673	0.155765	0.205	0.168	2689.03
Doc2a	0.159029	0.155748	0.072	0.034	1649.29
Ercc6	0.162457	0.155732	0.06	0.025	1677.36
Tmed9	0.390993	0.155636	0.38	0.361	2661.88
Tsc2	0.465892	0.155587	0.114	0.092	2410.99
Marc2	0.117396	0.155442	0.078	0.034	1296.29
Gcdh	0.205197	0.15544	0.078	0.042	2033.3
Pbrm1	0.536071	0.155214	0.235	0.218	2435.91
Ubxn1	0.173029	0.155194	0.114	0.067	1767.49
Ccdc59	0.471311	0.154895	0.151	0.126	2418.3
Pus10	0.307878	0.15479	0.048	0.025	2415.3
C1ql2	0.430307	0.154648	0.042	0.025	2331.84
Polr2b	0.504093	0.154637	0.048	0.034	2401.5
Frs3	0.124197	0.154527	0.078	0.034	1363.81
Cabin1	0.294904	0.154441	0.187	0.143	2335.64
Tfb2m	0.477728	0.154403	0.06	0.042	2423.99
Nup210	0.821842	0.154385	0.096	0.092	1158.8
Mipep	0.204495	0.154373	0.03	0.008	2031.25
Rpain	0.11249	0.154358	0.078	0.034	1247.17
Mtg1	0.495443	0.15429	0.096	0.076	2411.82
Mtdh	0.825017	0.154265	0.38	0.42	1143.47
Zmym4	0.737162	0.154252	0.163	0.16	2100.17
Miga2	0.914891	0.154028	0.175	0.185	695.317
Mfsd14a	0.495709	0.153968	0.235	0.21	2410.63
Rps18	0.372735	0.153847	0.633	0.647	2684.44
Snapin	0.941711	0.153469	0.108	0.118	455.788
Gemin5	0.0569871	0.153349	0.03	0	695.413
Emc10	0.306535	0.153338	0.464	0.437	2406.3
Rpl9-ps6	0.0795593	0.153187	0.072	0.025	942.937
Nfe2l1	0.311736	0.153031	0.464	0.454	2438.08
Sptlc1	0.649035	0.153024	0.12	0.109	2383.26
Cd59a	0.459244	0.153003	0.06	0.042	2405.52
Dgat2	0.934885	0.152899	0.09	0.092	524.471
Ciao1	0.301704	0.152871	0.048	0.025	2375.62
Ktn1	0.578363	0.152714	0.343	0.336	2444.74
Slc4a7	0.537676	0.152699	0.096	0.076	2433.52
BC031181	0.320162	0.152464	0.452	0.445	2462.37
Tmco3	0.949864	0.152184	0.181	0.202	384.695
Ufc1	0.419585	0.152143	0.072	0.05	2309.4
Ttll3	0.406282	0.152063	0.054	0.034	2348.71
Ddx18	0.389404	0.151993	0.084	0.059	2660.8
Creb1	0.371925	0.151929	0.084	0.059	2680.09
Atp2a2	0.206766	0.151897	0.639	0.58	2044.09
Cldn12	0.443587	0.151853	0.108	0.084	2369.64
Nup214	0.303323	0.151847	0.06	0.034	2386.24
Cdk20	0.52299	0.151831	0.048	0.034	2423.01
Gm46218	0.0366761	0.151813	0.036	0	465.016
Scd2	0.250826	0.151703	0.735	0.681	2062.29
Ssr4	0.505984	0.151645	0.464	0.496	2402.92
Smim18	0.514847	0.151615	0.048	0.034	2412.06
March3	0.307878	0.151541	0.048	0.025	2415
Cept1	0.533344	0.15149	0.205	0.185	2430.45
Vangl2	0.859216	0.151458	0.139	0.143	986.38
Pnpla8	0.50512	0.151418	0.265	0.252	2401.34
Ttc14	0.233004	0.151409	0.675	0.672	2158.79
Mrpl27	0.119093	0.151399	0.066	0.025	1313.12
Lrrn3	0.46331	0.151372	0.283	0.269	2407.36
Me1	0.595276	0.151354	0.054	0.042	2423.37
Sept1	0.228147	0.15132	0.139	0.092	2187.48
Wdyhv1	0.206593	0.150853	0.03	0.008	2045.27
Copg2	0.800716	0.150826	0.12	0.118	1586.22
Gpld1	0.290319	0.150686	0.175	0.134	2306.3
Hacd3	0.596788	0.15062	0.337	0.345	2423.56
Fam135b	0.599569	0.150392	0.09	0.076	2419.86
Camkk2	0.984073	0.15039	0.127	0.134	88.5666
Suco	0.661363	0.150357	0.199	0.193	2361.06
R3hdm2	0.723865	0.150266	0.084	0.076	2147.71
Rpl38	0.730339	0.15024	0.783	0.815	2128.21
Znhit1	0.323278	0.150161	0.12	0.084	2469.19
Nr1h2	0.387634	0.15008	0.084	0.059	2654.52
Prrc2a	0.529335	0.14987	0.241	0.218	2427.53
Zfp770	0.296069	0.149687	0.06	0.034	2343.68
Mrpl36	0.603783	0.149629	0.09	0.076	2419.36
Slc25a36	0.357632	0.149569	0.307	0.269	2629.67
Zmat5	0.204495	0.149357	0.03	0.008	2031.04
Trpc5	0.399558	0.149305	0.187	0.151	2678.24
Ints6	0.54724	0.149252	0.205	0.185	2433.03
Wac	0.500128	0.149247	0.337	0.311	2409.62
Ccdc106	0.701386	0.149136	0.127	0.118	2188.32
Gria2	0.0545647	0.148964	0.988	0.966	668.8
Ndufa4	0.164661	0.148959	0.645	0.622	1696.67
Wdr60	0.754715	0.148888	0.048	0.042	1944.15
Mterf3	0.444139	0.148853	0.09	0.067	2369.93
Kcnc2	0.362225	0.148822	0.187	0.151	2643.16
2810402E24Rik	0.299665	0.14882	0.048	0.025	2364.66
Ripor2	0.487959	0.148705	0.096	0.076	2441.75
Tarsl2	0.806311	0.148456	0.072	0.067	1552.96
Syvn1	0.910195	0.148322	0.114	0.118	724.515
Taf2	0.583261	0.148261	0.108	0.092	2439.2
Efs	0.225395	0.148193	0.042	0.017	2168.75
Sdhaf4	0.297635	0.148184	0.048	0.025	2352.8
Usp4	0.696749	0.148165	0.199	0.193	2219.15
Adcy3	0.722447	0.148156	0.169	0.16	2149.28
Prelid3a	0.217386	0.148069	0.054	0.025	2115.82
Fam118a	0.821842	0.147994	0.096	0.092	1157.97
Nabp1	0.204495	0.147967	0.03	0.008	2030.84
Aasdhppt	0.252765	0.147937	0.084	0.05	2071.66
Ngrn	0.440772	0.147768	0.145	0.118	2362.54
Tmem60	0.439311	0.147758	0.145	0.118	2357.34
Rasd1	0.0569871	0.147703	0.03	0	695.356
S100b	0.322097	0.147702	0.024	0.008	2467.59
Cox19	0.728291	0.147504	0.066	0.059	2142.63
Prnp	0.125158	0.147496	0.801	0.748	1373.24
Wdfy2	0.369781	0.147443	0.066	0.042	2676.1
Gpbp1	0.458145	0.147386	0.163	0.134	2402.05
Gpbp1l1	0.876781	0.14735	0.108	0.109	917.113
Gmpr2	0.318609	0.147314	0.12	0.084	2459.66
Hypk	0.336133	0.147303	0.181	0.143	2524.7
Nipsnap1	0.358279	0.147257	0.127	0.092	2632.63
Mthfsl	0.0366761	0.147251	0.036	0	464.979
Qdpr	0.593181	0.147083	0.072	0.059	2433.23
Trmt5	0.134262	0.147065	0.036	0.008	1456.61
Egln2	0.36076	0.147041	0.114	0.084	2638.6
Cntfr	0.531823	0.14702	0.127	0.109	2428.83
A930029G22Rik	0.0569871	0.146981	0.03	0	695.3
Mrpl43	0.567698	0.146786	0.114	0.151	2453.02
Ccpg1	0.261252	0.14659	0.187	0.143	2117.45
6720427I07Rik	0.354389	0.146527	0.066	0.042	2613.26
Fopnl	0.895726	0.14647	0.151	0.151	809.737
Zfp976	0.316885	0.146467	0.036	0.017	2452.06
Cnot2	0.60801	0.146441	0.09	0.076	2411.97
Zscan26	0.838262	0.146234	0.265	0.277	1080.52
Sema6b	0.583538	0.146178	0.301	0.303	2438.6
Tmem160	0.670393	0.146077	0.06	0.05	2343.69
Hectd4	0.964558	0.145942	0.187	0.202	246.927
Gm13889	0.089367	0.14577	0.024	0	1040.86
Tmem126a	0.49259	0.145753	0.078	0.059	2420.09
Fgfr3	0.223559	0.145738	0.042	0.017	2155.78
Tagln3	0.5493	0.145731	0.199	0.185	2433.95
Ralgps2	0.664889	0.145704	0.127	0.16	2353.04
Uqcrb	0.98295	0.145645	0.295	0.328	96.3291
Cwc22	0.514847	0.145495	0.048	0.034	2411.54
Rhpn1	0.238545	0.145359	0.042	0.017	2186.26
Rps6ka4	0.424981	0.145352	0.042	0.025	2317
Iqce	0.436901	0.145329	0.108	0.084	2349.65
Smarcd1	0.628853	0.145304	0.084	0.109	2397.19
Brk1	0.999027	0.145267	0.133	0.143	11.9883
Arfgap1	0.979125	0.145048	0.157	0.168	133.161
Pgrmc2	0.37651	0.145012	0.277	0.244	2695.06
Tmem67	0.837622	0.145006	0.102	0.118	1083.88
Shank2	0.280176	0.14481	0.06	0.034	2241.69
Trhde	0.307878	0.144738	0.048	0.025	2414.69
Arxes1	0.879488	0.144719	0.235	0.269	892.68
Emc7	0.691872	0.144691	0.373	0.378	2249.97
C2cd2	0.766998	0.144686	0.048	0.042	1823.16
Cdkn2aipnl	0.830014	0.14464	0.054	0.05	1115.54
BC005537	0.686681	0.144626	0.301	0.319	2268.11
Tmeff2	0.7462	0.14461	0.235	0.277	2013.25
Trim28	0.328706	0.144569	0.108	0.076	2487.32
Ddx56	0.509455	0.144519	0.048	0.034	2408.2
Spag6l	0.132855	0.144432	0.036	0.008	1444.53
Cct7	0.238296	0.144391	0.139	0.092	2187.56
Cnnm1	0.785451	0.144268	0.289	0.303	1659.66
Hadhb	0.62359	0.144252	0.114	0.101	2408.93
Xpr1	0.510718	0.144231	0.416	0.395	2411.1
Tbc1d13	0.504093	0.144183	0.048	0.034	2401
Zbtb48	0.258268	0.144135	0.084	0.05	2100.24
Spcs1	0.595097	0.144042	0.301	0.294	2423.83
Agbl5	0.0874732	0.144002	0.042	0.008	1021.51
Peg10	0.576963	0.143968	0.072	0.059	2444.59
Rnf115	0.657025	0.143915	0.078	0.067	2379.09
Brms1	0.318975	0.143758	0.024	0.008	2461.21
Pdrg1	0.88734	0.143723	0.102	0.101	850.072
Gtpbp8	0.363961	0.14363	0.066	0.042	2650
Rfk	0.459244	0.143517	0.06	0.042	2405.06
Zfp442	0.394744	0.143489	0.084	0.059	2674
Dsel	0.513561	0.143342	0.066	0.05	2412.19
Phtf2	0.10334	0.143327	0.054	0.017	1159.78
Eif2ak3	0.0403126	0.143294	0.054	0.008	506.609
Adipor2	0.973486	0.143084	0.108	0.118	172.307
Plekhf2	0.0569871	0.143023	0.03	0	695.243
Plch2	0.316885	0.14295	0.036	0.017	2451.74
Ppef2	0.459761	0.142929	0.03	0.017	2406.39
AL589692.1	0.322097	0.142847	0.024	0.008	2467.26
Gtf2f1	0.427639	0.14277	0.042	0.025	2325.08
Dbn1	0.374538	0.142764	0.331	0.286	2688.44
Hlf	0.811412	0.142709	0.072	0.067	1535.19
Gpr45	0.571611	0.142621	0.127	0.109	2453.35
Siah2	0.575171	0.142568	0.036	0.025	2450.81
Rpa1	0.225395	0.142566	0.042	0.017	2168.52
Oxsr1	0.290706	0.142457	0.06	0.034	2308.2
Col9a2	0.3883	0.142372	0.054	0.034	2656.75
Tmtc2	0.733137	0.142116	0.084	0.076	2120.96
1700020I14Rik	0.326677	0.1421	0.078	0.05	2483.07
Tmod3	0.358405	0.141859	0.096	0.067	2632.13
Cited4	0.0366761	0.1418	0.036	0	464.942
Glg1	0.437347	0.14178	0.434	0.437	2351.18
Slc44a5	0.575171	0.141771	0.036	0.025	2450.23
Atp5b	0.727668	0.141703	0.277	0.277	2144.44
Evi5	0.20605	0.141612	0.09	0.05	2040.72
Ube2q1	0.589894	0.141598	0.054	0.042	2434.49
Tub	0.308264	0.14157	0.205	0.286	2416.79
Dkkl1	0.0569871	0.141556	0.03	0	695.186
Sde2	0.335058	0.141514	0.078	0.05	2518.96
Lmnb1	0.11095	0.141296	0.054	0.017	1231.87
Tmem56	0.607339	0.141227	0.133	0.118	2414.78
Llgl1	0.315873	0.141069	0.024	0.008	2457.17
Acer3	0.358405	0.141048	0.096	0.067	2631.77
Orc2	0.303323	0.140954	0.06	0.034	2385.94
Cacna1h	0.508686	0.140953	0.096	0.076	2407.61
Itm2b	0.480355	0.140949	0.627	0.605	2428.67
Efnb3	0.257399	0.140811	0.627	0.571	2096.78
Zfp458	0.089367	0.140777	0.024	0	1040.77
Slc30a4	0.768904	0.140679	0.114	0.109	1815.38
Usp35	0.0606288	0.140642	0.048	0.008	734.518
Slc7a8	0.619754	0.140571	0.133	0.118	2412.08
Islr2	0.604891	0.140568	0.072	0.059	2419.57
Pyurf	0.773249	0.140567	0.048	0.059	1756.82
Samd10	0.619079	0.140552	0.072	0.059	2411.93
Gm45716	0.0913142	0.140519	0.042	0.008	1057.05
Gmppa	0.124197	0.140432	0.078	0.034	1363.68
C1galt1c1	0.868721	0.140176	0.096	0.109	950.381
St8sia1	0.76043	0.140038	0.084	0.101	1932.25
Tmem208	0.300892	0.139797	0.277	0.227	2371.33
Csrnp2	0.0569871	0.139726	0.03	0	695.129
Trpm3	0.132855	0.139681	0.036	0.008	1444.4
Arrdc1	0.574805	0.1396	0.066	0.05	2452.12
Limd1	0.427639	0.139528	0.042	0.025	2324.65
Cnpy4	0.161247	0.139417	0.06	0.025	1667.46
Ccdc151	0.204495	0.139358	0.03	0.008	2030.63
Tctn3	0.19144	0.139175	0.09	0.05	1916.89
Icam5	0.118174	0.139056	0.066	0.025	1303.81
Dip2c	0.71695	0.139006	0.108	0.101	2155.87
Stum	0.583261	0.138967	0.108	0.092	2438.61
Stk35	0.135681	0.138963	0.036	0.008	1468.34
Fam71e1	0.14223	0.138945	0.018	0	1526.41
Stk4	0.221734	0.138943	0.042	0.017	2143.29
Gm37494	0.838835	0.138791	0.054	0.05	1078.74
Spock2	0.411456	0.13879	0.675	0.681	2333.37
Atp1a2	0.614334	0.138652	0.072	0.059	2410.03
Epha4	0.96173	0.138554	0.175	0.185	272.17
Shtn1	0.364421	0.138518	0.084	0.126	2651.17
Armc8	0.841476	0.138476	0.102	0.101	1065.31
Cacng4	0.820893	0.138441	0.151	0.176	1166.49
Pgk1	0.874457	0.138367	0.06	0.059	923.426
Exosc3	0.0569871	0.13816	0.03	0	695.072
Vps37a	0.772684	0.13814	0.114	0.134	1758.63
Cers5	0.425802	0.138106	0.157	0.126	2318.06
Senp8	0.225296	0.138098	0.054	0.025	2168.7
Reep3	0.643128	0.138096	0.078	0.067	2389.22
Eif3b	0.755133	0.138031	0.09	0.084	1943.71
Galnt18	0.585053	0.137975	0.036	0.025	2437.33
Maf	0.824297	0.137937	0.072	0.084	1147.42
B230219D22Rik	0.588925	0.137851	0.169	0.151	2432.26
Fbxl19	0.276486	0.137827	0.072	0.042	2218.25
Xpo6	0.467486	0.137803	0.217	0.193	2412.23
Fbxl5	0.864168	0.137785	0.157	0.16	961.819
Tnpo2	0.387634	0.137766	0.084	0.059	2654.13
Man2c1	0.47972	0.137754	0.145	0.118	2429.78
Manba	0.543754	0.137742	0.066	0.05	2433.3
BC004004	0.717838	0.137467	0.175	0.168	2152.08
Zfp60	0.899696	0.137453	0.06	0.059	787.234
Selenot	0.605686	0.137417	0.416	0.429	2419.11
Ahsa2	0.438323	0.137415	0.187	0.16	2354.67
Vkorc1l1	0.899262	0.137344	0.175	0.193	790.451
Drap1	0.612671	0.137336	0.145	0.185	2410.25
Sccpdh	0.724946	0.137335	0.259	0.269	2143.66
Pnn	0.515104	0.137193	0.446	0.437	2411.72
Prepl	0.466388	0.137145	0.03	0.017	2412.16
Pcsk1	0.227241	0.137105	0.042	0.017	2180.6
Cpsf4	0.782367	0.137061	0.09	0.084	1672.7
Taf7	0.714586	0.137056	0.06	0.076	2159.48
Stxbp5	0.946469	0.137036	0.181	0.202	408.875
Klhl23	0.689591	0.137021	0.06	0.076	2250.83
Cops3	0.46539	0.136978	0.151	0.126	2410.26
Arhgap6	0.303753	0.136964	0.048	0.025	2388.41
Sh3glb2	0.948025	0.136888	0.12	0.126	402.911
Akr7a5	0.73089	0.136759	0.066	0.059	2123.97
Ldb2	0.597975	0.136704	0.054	0.042	2421.2
Tmc4	0.775948	0.136688	0.108	0.126	1744.33
Ehmt2	0.991084	0.136574	0.205	0.227	55.5007
Casp2	0.132855	0.136477	0.036	0.008	1444.26
Carns1	0.132855	0.13645	0.036	0.008	1444.13
4930453N24Rik	0.292486	0.136386	0.06	0.034	2320.29
Snx1	0.773368	0.136296	0.072	0.067	1754.77
Abca1	0.0366761	0.136278	0.036	0	464.906
Becn1	0.922684	0.136147	0.114	0.118	651.415
Phtf1	0.852251	0.135915	0.133	0.134	1019.29
Tmem234	0.194511	0.135896	0.331	0.277	1944.14
Kcnmb4	0.579199	0.135756	0.054	0.042	2440.74
Arl14ep	0.383881	0.13574	0.054	0.034	2684.86
Clip2	0.671861	0.135704	0.042	0.034	2329.34
Rundc1	0.120947	0.135692	0.066	0.025	1331.27
mt-Co2	0.0112164	0.135549	0.994	0.992	148.965
Cipc	0.750622	0.135547	0.09	0.084	1950.12
Frat2	0.315873	0.135499	0.024	0.008	2456.86
Psmb3	0.381559	0.135435	0.114	0.084	2702.97
Spopl	0.798381	0.135418	0.09	0.084	1591.97
Pkig	0.835656	0.135389	0.145	0.168	1088.86
Rpl36	0.338915	0.135342	0.542	0.538	2538.48
Oxct1	0.898504	0.135291	0.145	0.16	792.48
Chordc1	0.343418	0.135216	0.259	0.218	2559.49
Nisch	0.204115	0.135204	0.627	0.58	2028.7
Mrps31	0.089367	0.1352	0.024	0	1040.68
Eif1ax	0.650062	0.135145	0.078	0.067	2381.18
S100a16	0.089367	0.135132	0.024	0	1040.59
Micall1	0.686441	0.135081	0.06	0.05	2268
Siae	0.470749	0.135059	0.06	0.042	2417.77
Dbnl	0.945943	0.134959	0.108	0.118	415.269
Cox6c	0.921492	0.134924	0.464	0.487	663.474
Cnih4	0.719244	0.134907	0.084	0.076	2148.38
Asb1	0.593181	0.134817	0.072	0.059	2432.64
Pfkfb2	0.610128	0.134617	0.09	0.076	2410.62
Fnip2	0.132855	0.134611	0.036	0.008	1444
Dram2	0.668399	0.134582	0.145	0.134	2344.07
Evi5l	0.489824	0.134542	0.096	0.076	2441.77
Stbd1	0.206593	0.134501	0.03	0.008	2045.07
Ccdc86	0.15885	0.1345	0.06	0.025	1648.07
Enc1	0.798234	0.134493	0.114	0.134	1596.47
Atp6v0d1	0.829857	0.134437	0.199	0.202	1116.16
Tmem35a	0.788094	0.134413	0.392	0.395	1655.78
Abi2	0.320651	0.134405	0.536	0.546	2462.6
Fntb	0.132855	0.134335	0.036	0.008	1443.86
Mpv17	0.571611	0.134329	0.127	0.109	2452.78
Cdc34	0.578456	0.134284	0.036	0.025	2443.98
Cnih1	0.842491	0.134173	0.277	0.294	1053.11
Fuca1	0.739557	0.134171	0.108	0.101	2056.71
Pold4	0.312815	0.134112	0.09	0.059	2441.83
Hcfc1r1	0.89295	0.133963	0.145	0.16	815.263
C030006K11Rik	0.0569871	0.133775	0.03	0	695.015
Vwa3a	0.206593	0.133663	0.03	0.008	2044.86
Med30	0.385869	0.133624	0.084	0.059	2691.05
Cbll1	0.670393	0.13352	0.06	0.05	2343.02
Tmx3	0.591884	0.133463	0.325	0.328	2431.46
Mdh2	0.838918	0.133448	0.127	0.126	1078.01
Strbp	0.406287	0.133373	0.295	0.261	2347.12
Cnot6	0.951892	0.133353	0.114	0.118	366.479
Txndc15	0.396978	0.133202	0.295	0.269	2675.24
Tmem68	0.395068	0.133062	0.133	0.101	2675.01
Tsen15	0.159208	0.133047	0.127	0.076	1650.66
Rpa3	0.595276	0.132994	0.054	0.042	2422.77
Afg3l2	0.75089	0.132894	0.09	0.109	1950.06
Actr6	0.11292	0.132855	0.054	0.017	1251.38
Cbln1	0.777414	0.132835	0.03	0.025	1690.87
Ndfip2	0.464153	0.132793	0.313	0.294	2406.63
Uba6	0.457887	0.132765	0.127	0.101	2402.08
Magoh	0.417597	0.132717	0.072	0.05	2305.55
Zbtb8os	0.58175	0.132666	0.036	0.025	2442.77
Phax	0.848894	0.132665	0.078	0.076	1035.65
Dgcr14	0.463068	0.132577	0.03	0.017	2408.88
Slc35b4	0.795955	0.132557	0.127	0.151	1613.4
Elp4	0.14223	0.132371	0.018	0	1526.27
Mfap1b	0.597853	0.132308	0.072	0.059	2423.7
Taf1a	0.463068	0.13227	0.03	0.017	2408.42
Laptm4a	0.359764	0.132247	0.386	0.345	2637.43
Rps24	0.193057	0.132223	0.777	0.739	1931.73
Krt77	0.204495	0.132184	0.03	0.008	2030.43
Pym1	0.432985	0.13217	0.042	0.025	2338.99
Iws1	0.959276	0.132138	0.09	0.092	290.661
Miip	0.156472	0.132122	0.114	0.067	1628.4
Klc4	0.665076	0.132076	0.06	0.05	2350.38
2810474O19Rik	0.532728	0.13204	0.139	0.118	2429.24
Ehd1	0.314135	0.131992	0.048	0.025	2449.94
Nsmce4a	0.307878	0.131918	0.048	0.025	2414.38
Gse1	0.827079	0.131877	0.054	0.05	1133.92
Mien1	0.731938	0.131644	0.127	0.118	2121.89
Krt10	0.671042	0.131487	0.078	0.067	2329.86
Gale	0.314135	0.131477	0.048	0.025	2449.63
Bola1	0.473069	0.131434	0.06	0.042	2418.33
Rab30	0.387634	0.131343	0.084	0.059	2653.74
Tsen2	0.213903	0.131259	0.066	0.034	2094.97
Gpr180	0.710033	0.131248	0.084	0.076	2172.7
Cercam	0.134262	0.131092	0.036	0.008	1456.48
Lsm14a	0.95325	0.131089	0.078	0.084	359.375
Arvcf	0.269521	0.130885	0.084	0.05	2171.53
Ccar1	0.536781	0.130764	0.223	0.202	2431.62
Zranb2	0.476667	0.130695	0.542	0.538	2421.95
Slc35a5	0.7893	0.13067	0.114	0.109	1644.9
Rps9	0.39952	0.130649	0.5	0.487	2678.38
Nol11	0.556979	0.130625	0.084	0.067	2442.35
Acta1	0.132855	0.130579	0.036	0.008	1443.73
Bag6	0.598607	0.130547	0.108	0.092	2418.97
Timm17b	0.234733	0.130495	0.042	0.017	2167.53
Borcs8	0.659353	0.130475	0.078	0.067	2364.44
Vdac3	0.73629	0.130451	0.175	0.21	2100.63
Pfdn6	0.775889	0.130436	0.072	0.067	1745.75
Fam13c	0.95325	0.130335	0.078	0.084	358.422
Gm3604	0.14223	0.130294	0.018	0	1526.13
Chsy1	0.723105	0.130156	0.066	0.059	2149.07
Flcn	0.552336	0.130077	0.12	0.101	2434.7
Ccdc159	0.658138	0.130071	0.024	0.017	2377.85
Neat1	0.0932849	0.130041	0.042	0.008	1076.97
Sirt4	0.68163	0.130007	0.078	0.067	2297.09
Clasp2	0.773356	0.129911	0.205	0.244	1755.52
Grcc10	0.777809	0.12991	0.09	0.084	1681.62
5031425E22Rik	0.757972	0.129846	0.175	0.168	1935.86
Ankef1	0.435692	0.129832	0.072	0.05	2346.64
Mt1	0.337983	0.129696	0.319	0.286	2534.53
2310033P09Rik	0.844225	0.129637	0.096	0.092	1045.15
Mpv17l	0.458047	0.129569	0.151	0.126	2402.46
Adprm	0.39052	0.129524	0.054	0.034	2661.4
Pank1	0.517554	0.129489	0.048	0.034	2416.46
Bud31	0.943572	0.129409	0.066	0.067	447.253
Dek	0.278056	0.1294	0.072	0.042	2227.79
Arhgap39	0.693904	0.129285	0.151	0.143	2232.98
Clpb	0.284935	0.129169	0.102	0.067	2271.5
4933434E20Rik	0.846215	0.12907	0.319	0.328	1039.15
Slc2a1	0.221734	0.12903	0.042	0.017	2143.06
Gpr88	0.505124	0.12891	0.078	0.059	2400.86
Ikzf4	0.860236	0.128859	0.066	0.076	975.507
Lhfpl5	0.397229	0.128851	0.054	0.034	2676.53
Oser1	0.314135	0.128801	0.048	0.025	2449.31
Sgsm1	0.858443	0.128726	0.289	0.311	992.361
Gpr137	0.696887	0.128723	0.12	0.109	2216.8
Abcb10	0.353674	0.128694	0.096	0.067	2609.05
Ckap5	0.704281	0.128513	0.102	0.092	2182.57
Tmcc3	0.291176	0.128499	0.361	0.319	2310.77
Tmem120b	0.595012	0.128495	0.036	0.025	2428.84
Rtl6	0.417064	0.128379	0.042	0.025	2319.29
Slc39a6	0.718695	0.128346	0.301	0.311	2149.62
Pias2	0.896689	0.128307	0.09	0.092	801.64
2510039O18Rik	0.363687	0.128277	0.114	0.084	2649.46
Llph	0.931584	0.128186	0.054	0.059	561.745
Nudt9	0.593181	0.128115	0.072	0.059	2432.04
Rps6ka6	0.532037	0.127846	0.066	0.05	2429.28
Zfp867	0.157061	0.127788	0.048	0.017	1633.43
Nt5c2	0.597467	0.127745	0.09	0.076	2423.92
Snapc1	0.75415	0.12772	0.133	0.126	1947.22
Fbxl20	0.27048	0.127623	0.114	0.076	2178.72
Timm10	0.31204	0.127618	0.048	0.025	2439.53
Sirt5	0.9361	0.127593	0.133	0.134	516.727
Thpo	0.0932849	0.127592	0.042	0.008	1076.88
Gt(ROSA)26Sor	0.141996	0.127544	0.151	0.092	1524.19
Aip	0.484327	0.127466	0.078	0.059	2436.65
Dcp2	0.663273	0.127418	0.12	0.151	2351.97
Cox6a1	0.858519	0.127331	0.488	0.546	991.589
Vapa	0.528431	0.127302	0.127	0.109	2428.14
Fbxo38	0.3883	0.127291	0.054	0.034	2656.36
Gm29480	0.134262	0.127176	0.036	0.008	1456.34
Fstl4	0.0366761	0.126959	0.036	0	464.869
Appl1	0.473609	0.126903	0.145	0.118	2419.19
Yod1	0.683445	0.126873	0.102	0.092	2292.27
Exosc2	0.382353	0.126819	0.084	0.059	2679.53
Atp23	0.089367	0.126808	0.024	0	1040.5
Stag1	0.860686	0.126792	0.127	0.126	973.436
Mical2	0.379609	0.126743	0.066	0.042	2696.36
Bend5	0.575171	0.126579	0.036	0.025	2449.65
Zdhhc3	0.559355	0.126551	0.096	0.126	2447.18
Mia3	0.831751	0.126539	0.211	0.244	1106.23
Ankhd1	0.970464	0.12644	0.078	0.084	200.886
Adipor1	0.858058	0.126356	0.133	0.134	993.631
Arfgef1	0.728636	0.126355	0.175	0.168	2142.92
Tefm	0.089367	0.126331	0.024	0	1040.41
Slc7a10	0.204495	0.126273	0.03	0.008	2030.23
Ldhd	0.833016	0.126252	0.096	0.092	1096.25
Ndufa13	0.338858	0.12625	0.717	0.756	2538.39
Chmp1a	0.886161	0.126186	0.066	0.076	851.601
Slitrk1	0.825473	0.126063	0.307	0.361	1138.33
Tiam1	0.539052	0.126026	0.066	0.05	2435.98
A730046J19Rik	0.089367	0.125992	0.024	0	1040.32
Tiprl	0.916494	0.125941	0.114	0.126	687.37
Epdr1	0.735019	0.125937	0.319	0.336	2104.36
Fbxo45	0.67505	0.12581	0.042	0.034	2330.95
Zfp94	0.6943	0.125637	0.042	0.034	2232.87
Dnajb1	0.320475	0.125609	0.048	0.025	2463.49
Hipk2	0.657133	0.125592	0.06	0.05	2377.51
Met	0.401152	0.125504	0.006	0	2681.3
Slc37a4	0.763922	0.125349	0.048	0.042	1827.3
Rmdn3	0.602658	0.125259	0.151	0.134	2419.67
As3mt	0.31204	0.125195	0.048	0.025	2439.22
Commd10	0.0569871	0.125184	0.03	0	694.958
Bcl7a	0.951622	0.125111	0.066	0.067	367.326
Cnppd1	0.991015	0.125103	0.072	0.076	56.4878
Mtss1	0.425618	0.125096	0.199	0.168	2317.92
Cpne7	0.42033	0.12505	0.337	0.294	2310.98
Wdr43	0.664185	0.124992	0.114	0.101	2352.54
Zfp948	0.316239	0.124882	0.048	0.025	2451.49
Neto1	0.225296	0.124735	0.054	0.025	2168.47
Mink1	0.770276	0.124715	0.078	0.092	1764.7
Sumo3	0.788365	0.124565	0.187	0.185	1655.57
Fam69b	0.964561	0.124479	0.253	0.269	245.963
Zfp30	0.735429	0.1244	0.108	0.101	2104.06
1700019D03Rik	0.140008	0.124396	0.036	0.008	1508.59
Phf24	0.460886	0.124336	0.09	0.126	2402.6
Inafm2	0.287604	0.12431	0.072	0.042	2287.89
Ppp1r14c	0.218117	0.124307	0.042	0.017	2121.84
Pdcd2	0.50723	0.124291	0.078	0.059	2405.28
Ampd3	0.31204	0.124279	0.048	0.025	2438.91
Pole3	0.316885	0.124274	0.036	0.017	2451.42
Simc1	0.914245	0.124254	0.108	0.118	702.14
Adk	0.520268	0.12424	0.048	0.034	2417.69
Gpatch11	0.397229	0.124235	0.054	0.034	2676.13
Lrfn1	0.889552	0.124062	0.108	0.109	833.51
Uba5	0.572474	0.123995	0.163	0.143	2453.05
Actr8	0.566171	0.123943	0.102	0.084	2452.09
Rcc1l	0.681444	0.123907	0.042	0.034	2297.83
Pfdn5	0.976637	0.123876	0.392	0.454	148.449
Cyth2	0.597853	0.123753	0.072	0.059	2423.1
Cebpz	0.705443	0.123711	0.084	0.076	2180.53
Insm1	0.0366761	0.123665	0.036	0	464.832
Timm8b	0.626186	0.123643	0.253	0.303	2405.81
Arsb	0.455458	0.123635	0.241	0.218	2396.16
Coil	0.225395	0.123628	0.042	0.017	2168.3
Dnajc10	0.502697	0.123587	0.313	0.286	2414.46
Perp	0.0569871	0.123585	0.03	0	694.901
Rhbdd1	0.204495	0.123518	0.03	0.008	2030.02
Rrp36	0.0569871	0.123498	0.03	0	694.844
Mapk8ip3	0.774545	0.123289	0.259	0.261	1753.57
Kcnk1	0.902459	0.123253	0.084	0.084	768.895
Acad9	0.157061	0.1232	0.048	0.017	1633.27
Ttll11	0.0569871	0.123177	0.03	0	694.787
Rps6	0.760908	0.123171	0.633	0.689	1929.66
Adamts17	0.206593	0.123149	0.03	0.008	2044.65
Eps8l1	0.14223	0.123147	0.018	0	1525.98
Fn3k	0.166125	0.123021	0.06	0.025	1709.59
Acyp2	0.575171	0.122881	0.036	0.025	2449.08
Tomm20	0.290131	0.122855	0.657	0.63	2305.09
Srsf12	0.738702	0.122754	0.066	0.059	2097.91
Ssh1	0.788033	0.122717	0.108	0.126	1656.45
Disp1	0.135681	0.122625	0.036	0.008	1468.21
Ptov1	0.599151	0.122596	0.343	0.345	2418.77
Rrp9	0.849338	0.122455	0.036	0.042	1033.64
Chpf2	0.521581	0.122343	0.187	0.16	2419.61
Cpxm1	0.0569871	0.122305	0.03	0	694.73
Ino80	0.60339	0.122288	0.054	0.042	2419.6
Aqp5	0.204495	0.122273	0.03	0.008	2029.82
Dock9	0.9132	0.122272	0.09	0.101	705.904
Sirt1	0.533949	0.122247	0.048	0.034	2430.53
Abhd6	0.654706	0.12221	0.12	0.109	2378.55
Ifnar2	0.299665	0.122207	0.048	0.025	2364.36
Zcchc3	0.324748	0.122192	0.048	0.025	2476.85
Rpl24	0.473798	0.122108	0.747	0.773	2418.74
AW549877	0.986743	0.122022	0.12	0.126	76.9659
Ddx42	0.839304	0.122001	0.102	0.101	1073.47
Grik3	0.455882	0.12188	0.217	0.286	2397.49
Smim11	0.20893	0.121762	0.078	0.042	2059.21
Mylip	0.315873	0.121664	0.024	0.008	2456.54
Ccdc57	0.678244	0.121417	0.042	0.034	2313.49
0610040B10Rik	0.545246	0.121397	0.12	0.101	2431.25
Crkl	0.781321	0.121389	0.03	0.025	1680.62
Rragd	0.386086	0.121381	0.054	0.034	2691.79
Ogfr	0.954307	0.121353	0.066	0.067	338.779
Chchd2	0.905869	0.121338	0.404	0.454	744.624
Rab26os	0.494448	0.12124	0.235	0.21	2421.31
Plcg1	0.528455	0.121227	0.048	0.034	2427.72
Coq2	0.70872	0.121144	0.114	0.109	2175.77
Larp4	0.777226	0.121126	0.078	0.092	1691.24
Plxna3	0.489319	0.121098	0.157	0.134	2443.17
Pgam5	0.873182	0.121065	0.066	0.076	936.924
Zbtb46	0.204495	0.12102	0.03	0.008	2029.61
Eif3d	0.484763	0.120992	0.06	0.042	2436.9
Hdac1	0.916853	0.120882	0.084	0.084	683.972
Aars2	0.528455	0.120872	0.048	0.034	2427.19
Nhsl2	0.751654	0.120856	0.048	0.042	1945.28
Yy1	0.725696	0.120825	0.066	0.059	2145.16
Smyd3	0.57402	0.120785	0.084	0.067	2451.64
Foxp2	0.490051	0.12077	0.018	0.008	2442.41
Lamtor1	0.694589	0.120736	0.096	0.118	2229.63
Lpcat2	0.204495	0.120691	0.03	0.008	2029.41
Frmd6	0.233409	0.120528	0.054	0.025	2161.37
Cox10	0.0922953	0.120512	0.042	0.008	1067.03
Supt4a	0.49556	0.120486	0.108	0.084	2411.4
Rpl41	0.078312	0.120468	0.976	0.966	929.485
H2-Q2	0.624797	0.120467	0.072	0.092	2408.59
Matr3	0.666489	0.120438	0.542	0.563	2352.04
Cpe	0.237498	0.120414	0.783	0.714	2181.89
Gucy1a2	0.089367	0.120373	0.024	0	1040.23
Slc43a2	0.996725	0.120368	0.102	0.109	25.9149
Aldh18a1	0.089367	0.120353	0.024	0	1040.14
Fgfbp3	0.691078	0.120307	0.042	0.034	2250.84
Ankzf1	0.26203	0.120203	0.096	0.059	2122.44
Golga2	0.853215	0.12014	0.096	0.092	1014.47
Zfpl1	0.320475	0.120113	0.048	0.025	2463.17
Rab36	0.92011	0.119926	0.139	0.151	664.319
Foxp4	0.813965	0.119791	0.072	0.067	1400.83
Cuta	0.403758	0.119609	0.133	0.101	2347.85
Gpr176	0.316885	0.11954	0.036	0.017	2451.11
Pik3c3	0.204495	0.119343	0.03	0.008	2029.2
Pdpk1	0.902181	0.119273	0.157	0.176	771.364
Rnf121	0.949803	0.1191	0.114	0.118	387.52
Prok2	0.346842	0.119088	0.139	0.101	2575.31
Atad5	0.134262	0.118989	0.036	0.008	1456.21
St3gal1	0.552758	0.118875	0.084	0.067	2435.45
Itpa	0.894078	0.118835	0.06	0.059	811.823
Mrm2	0.658138	0.118799	0.024	0.017	2377.19
Efhb	0.14223	0.11875	0.018	0	1525.84
Psmg4	0.322606	0.118692	0.048	0.025	2465.03
Hilpda	0.138554	0.118686	0.036	0.008	1494.03
Apeh	0.272386	0.118541	0.084	0.05	2190.8
Enpp4	0.858776	0.118486	0.078	0.076	989.31
Dnajc14	0.400128	0.118376	0.084	0.059	2680.06
Ccdc181	0.137112	0.118314	0.036	0.008	1480.67
Noa1	0.82676	0.118228	0.072	0.067	1136.8
Borcs5	0.0922953	0.118071	0.042	0.008	1066.93
Nop14	0.986028	0.118057	0.048	0.05	80.8543
Scarb2	0.606105	0.118018	0.41	0.412	2419.57
Cul5	0.425802	0.117704	0.157	0.126	2317.64
Megf9	0.563954	0.117609	0.229	0.21	2451.51
Fbxo33	0.90352	0.117572	0.199	0.21	762.571
Itgav	0.303753	0.11755	0.048	0.025	2388.11
Aven	0.0569871	0.11744	0.03	0	694.673
Dnajc8	0.653994	0.117422	0.133	0.118	2379.88
Mapk9	0.68556	0.11728	0.139	0.168	2272.63
Atg101	0.520268	0.117216	0.048	0.034	2417.17
2810429I04Rik	0.14223	0.117147	0.018	0	1525.7
Sirt2	0.94901	0.117118	0.139	0.143	392.89
Rabac1	0.813325	0.117061	0.265	0.261	1403.8
Glo1	0.871638	0.117006	0.133	0.134	941.369
Arfgap3	0.90427	0.116997	0.03	0.034	752.353
Ddx46	0.918311	0.116933	0.139	0.143	675.877
Psap	0.222145	0.116779	0.807	0.798	2145.48
Shcbp1l	0.0366761	0.116745	0.036	0	464.796
Btbd3	0.988448	0.116683	0.072	0.076	69.1913
Mrps18c	0.609605	0.11661	0.072	0.059	2410.38
Rundc3b	0.730542	0.116456	0.054	0.067	2125.88
Sil1	0.799871	0.116381	0.072	0.084	1587.74
Lta4h	0.664019	0.116293	0.066	0.084	2353.95
Nbas	0.798676	0.116271	0.072	0.067	1590.16
Acp2	0.727785	0.116214	0.241	0.235	2144.05
Ric8a	0.547014	0.116182	0.12	0.101	2432.57
Sept4	0.610946	0.11616	0.127	0.109	2408.96
Acat1	0.630386	0.116155	0.078	0.101	2394.2
C730034F03Rik	0.364577	0.116062	0.078	0.05	2651.94
Zmat2	0.467476	0.115985	0.127	0.101	2413.11
Ptk7	0.575171	0.115976	0.036	0.025	2448.5
Syngr3	0.371118	0.115942	0.566	0.571	2679.84
Nlgn3	0.76001	0.115835	0.47	0.513	1932.71
Letm1	0.990176	0.115805	0.102	0.109	60.4007
Hectd3	0.737788	0.115748	0.084	0.076	2099.74
A530017D24Rik	0.785235	0.115703	0.03	0.025	1665.48
Slc38a7	0.225296	0.11568	0.054	0.025	2168.25
Gabbr1	0.436869	0.115649	0.741	0.798	2349.92
Slc6a1	0.380153	0.115486	0.506	0.479	2699.47
Cmtm4	0.790605	0.115465	0.217	0.218	1640.51
Vbp1	0.230701	0.115436	0.277	0.21	2199.28
Kdsr	0.910907	0.115351	0.235	0.261	717.795
Fxyd1	0.132855	0.115245	0.036	0.008	1443.6
B3gat3	0.99764	0.115173	0.223	0.244	20.9504
Ppp1r14a	0.459761	0.115166	0.03	0.017	2405.93
Crtc2	0.11292	0.115136	0.054	0.017	1251.26
Dyx1c1	0.089367	0.115127	0.024	0	1040.05
Adamts19	0.089367	0.115105	0.024	0	1039.96
Med12	0.320475	0.115031	0.048	0.025	2462.85
Tspan14	0.326837	0.11497	0.036	0.017	2483.96
Zfp629	0.315873	0.114958	0.024	0.008	2456.23
Derl1	0.622404	0.114928	0.331	0.328	2411.82
Arl4a	0.949978	0.114908	0.09	0.092	381.891
Gphn	0.954133	0.114851	0.12	0.126	340.625
Rnf20	0.803071	0.114823	0.139	0.16	1565.99
Lin37	0.611188	0.114803	0.09	0.076	2409.31
Clk2	0.520268	0.114794	0.048	0.034	2416.65
Scg5	0.551497	0.114783	0.446	0.479	2432.65
Ndufs8	0.601504	0.114608	0.108	0.092	2421.05
Fh1	0.430307	0.114596	0.042	0.025	2331.41
Ube2d1	0.22666	0.114594	0.066	0.034	2176.39
Ctnnal1	0.850627	0.114562	0.054	0.05	1029.26
Phip	0.660346	0.114516	0.386	0.395	2359.42
B3gnt9	0.089367	0.11445	0.024	0	1039.87
Ooep	0.089367	0.114447	0.024	0	1039.78
Paqr7	0.643918	0.114411	0.157	0.143	2389.58
Gm43597	0.575171	0.114362	0.036	0.025	2447.93
Hapln2	0.089367	0.114341	0.024	0	1039.7
Ngly1	0.23177	0.114302	0.054	0.025	2205.52
E430018J23Rik	0.14223	0.114279	0.018	0	1525.56
Sept5	0.089367	0.114129	0.024	0	1039.61
Serf2	0.71285	0.113995	0.392	0.395	2166.35
Mrpl24	0.766446	0.113983	0.09	0.084	1824.14
Dad1	0.540882	0.113964	0.283	0.269	2432.34
Rsrc1	0.665076	0.113962	0.06	0.05	2349.71
Dlx6os1	0.830657	0.113912	0.09	0.084	1113.08
Brd4	0.609359	0.113851	0.181	0.16	2411.23
Tmem74b	0.204495	0.113815	0.03	0.008	2029
Ring1	0.457657	0.113807	0.349	0.311	2402.24
Lpcat4	0.894237	0.113772	0.108	0.118	810.179
Macrod1	0.089367	0.11371	0.024	0	1039.52
Efcab14	0.942622	0.11369	0.175	0.185	451.516
Kcnh4	0.315873	0.11364	0.024	0.008	2455.91
Cryab	0.312555	0.113632	0.06	0.034	2440.43
Nktr	0.443832	0.11362	0.53	0.538	2369.62
Igbp1	0.852762	0.113583	0.036	0.042	1017.34
Mpdu1	0.515313	0.11348	0.133	0.109	2412.18
Sbf1	0.600626	0.113476	0.084	0.109	2421.12
Cacna2d2	0.684466	0.113466	0.476	0.496	2277.9
Aida	0.765551	0.113418	0.12	0.143	1823.54
Tet2	0.421886	0.113372	0.199	0.168	2310.67
Ppp1r14b	0.606106	0.11334	0.054	0.042	2418.97
Lhx1os	0.089367	0.113316	0.024	0	1039.43
Tbk1	0.962764	0.113307	0.09	0.092	269.574
Dazap2	0.172408	0.113271	0.072	0.034	1764.6
Cdpf1	0.321836	0.113265	0.036	0.017	2467.84
Atg13	0.700822	0.113194	0.102	0.126	2204.79
Wdr4	0.496612	0.113142	0.06	0.042	2413.04
Aco1	0.459761	0.113128	0.03	0.017	2405.47
Ube2i	0.989868	0.113065	0.096	0.101	61.3718
Snrpb	0.450988	0.112992	0.139	0.109	2384.37
Pdia5	0.134262	0.112899	0.036	0.008	1456.07
Rab13	0.687861	0.112873	0.042	0.034	2269.25
Gabbr2	0.80005	0.112842	0.12	0.143	1586.5
Serinc3	0.689239	0.112822	0.253	0.303	2250.36
Tmco6	0.993582	0.112795	0.072	0.076	41.7304
Cops5	0.72746	0.112788	0.09	0.109	2146.01
Gm26601	0.760849	0.112751	0.048	0.042	1930.27
Men1	0.618635	0.112739	0.09	0.076	2413.29
Plxnb2	0.739429	0.112737	0.181	0.176	2095.54
Dok3	0.0569871	0.11255	0.03	0	694.616
Astn1	0.714972	0.112461	0.518	0.555	2157.79
Trafd1	0.827102	0.112422	0.102	0.118	1132.3
Slc35f3	0.658138	0.112401	0.024	0.017	2376.54
Plppr1	0.85924	0.112308	0.12	0.118	985.548
Ttc4	0.842326	0.112264	0.205	0.202	1057.12
Nmt2	0.640264	0.112242	0.253	0.244	2392.66
Slc15a4	0.475395	0.112137	0.06	0.042	2421.19
Stradb	0.393799	0.111997	0.054	0.084	2671.14
Rbbp7	0.803891	0.111864	0.175	0.21	1564.37
Prmt1	0.489334	0.111812	0.108	0.084	2442.26
Srp14	0.950949	0.111747	0.259	0.286	373.723
Ttc21b	0.935191	0.11168	0.114	0.118	523.707
Ubap2l	0.74115	0.111624	0.325	0.336	2053.73
Ifrd2	0.525719	0.111621	0.048	0.034	2424.09
Gm46404	0.089367	0.111538	0.024	0	1039.34
Jade3	0.432985	0.111518	0.042	0.025	2338.55
Rpap3	0.371734	0.111503	0.066	0.042	2683.17
Eif2ak1	0.225217	0.1115	0.066	0.034	2168.61
Glrx3	0.724015	0.111467	0.133	0.126	2146.7
Coq4	0.397229	0.111456	0.054	0.034	2675.74
Arid1a	0.74933	0.111448	0.181	0.176	2005.96
Pih1d1	0.206593	0.111397	0.03	0.008	2044.45
Arf5	0.950582	0.111396	0.452	0.529	374.529
Ccp110	0.548476	0.111306	0.066	0.05	2432.49
Tor1aip2	0.0637675	0.111256	0.09	0.034	769.674
Fkbp9	0.14223	0.111248	0.018	0	1525.42
Rhoq	0.210837	0.111148	0.03	0.008	2076.32
Abce1	0.813351	0.111112	0.127	0.126	1403.03
Ndufa9	0.743926	0.111095	0.066	0.059	2051
Polr3e	0.554867	0.111061	0.084	0.067	2438.64
Cmtm8	0.14223	0.111061	0.018	0	1525.27
Ncoa4	0.996818	0.111015	0.108	0.118	23.9236
Tmem216	0.763344	0.110991	0.078	0.092	1922.86
Gm26901	0.575171	0.110989	0.036	0.025	2447.35
2610301B20Rik	0.398407	0.110967	0.114	0.084	2679.68
Rcan1	0.321836	0.110965	0.036	0.017	2467.52
Nfkb1	0.681076	0.110949	0.06	0.05	2297.95
Cog3	0.777414	0.11094	0.03	0.025	1690.1
Mrpl47	0.52299	0.110854	0.048	0.034	2422.49
Nxt2	0.965544	0.110849	0.078	0.084	236.558
Slc26a6	0.14223	0.110821	0.018	0	1525.13
Tmem110	0.956992	0.110749	0.066	0.067	308.151
Rsl24d1	0.447783	0.110739	0.096	0.134	2375.04
Wapl	0.436901	0.110695	0.108	0.084	2349.22
Cacna1c	0.872606	0.110675	0.127	0.126	937.179
Ralb	0.5414	0.11062	0.066	0.05	2432.51
Elk4	0.52971	0.11058	0.066	0.05	2427.66
Sft2d1	0.907254	0.110577	0.084	0.084	733.061
Decr2	0.571877	0.110496	0.084	0.067	2452.78
9530068E07Rik	0.920026	0.110442	0.307	0.336	666.099
Ccdc30	0.520268	0.110411	0.048	0.034	2416.13
Paqr8	0.52971	0.110409	0.066	0.05	2427.13
Pigw	0.089367	0.110324	0.024	0	1039.25
Elac1	0.907811	0.11032	0.06	0.067	731.696
Gm11940	0.326837	0.110243	0.036	0.017	2483.63
Tmem266	0.671861	0.110224	0.042	0.034	2328.67
Glmn	0.940688	0.110215	0.09	0.092	466.581
Snhg6	0.872002	0.11021	0.102	0.101	940.89
Asic2	0.946017	0.110161	0.187	0.202	413.409
P4ha3	0.315873	0.11016	0.024	0.008	2455.6
Nufip1	0.591684	0.110137	0.036	0.025	2433.59
Rragb	0.141473	0.110118	0.036	0.008	1520.98
Foxn2	0.60068	0.110006	0.054	0.042	2418.34
Mpzl3	0.089367	0.109995	0.024	0	1039.16
Crcp	0.988448	0.109944	0.072	0.076	68.2029
Casp9	0.14223	0.109857	0.018	0	1524.99
Rsbn1l	0.468385	0.109778	0.09	0.067	2414.52
Higd1a	0.593697	0.10973	0.211	0.252	2428.81
Cndp2	0.315873	0.10969	0.024	0.008	2455.28
Proser1	0.967322	0.1096	0.193	0.202	231.19
Saysd1	0.334433	0.109464	0.036	0.017	2517.61
Asic1	0.841348	0.109421	0.181	0.185	1065.99
Mtx2	0.443878	0.109337	0.072	0.05	2369.42
Necab3	0.473069	0.109326	0.06	0.042	2417.86
Gm3764	0.346843	0.109279	0.139	0.101	2574.96
Thop1	0.575171	0.109278	0.036	0.025	2446.78
Npc1	0.538868	0.109261	0.187	0.16	2436.22
Chrac1	0.659353	0.109225	0.078	0.067	2363.78
Snrpa	0.708562	0.109187	0.12	0.109	2176.7
Slc9a6	0.385415	0.10918	0.458	0.437	2688.65
Lypd6	0.95325	0.109074	0.078	0.084	357.469
Ccdc107	0.733233	0.109009	0.187	0.176	2118.31
Zfp141	0.608827	0.10897	0.054	0.042	2412.17
Lrfn4	0.231951	0.108869	0.157	0.109	2205.85
Msh3	0.811412	0.108812	0.072	0.067	1534.38
N6amt1	0.692282	0.108808	0.078	0.067	2249.92
Zfp61	0.318352	0.10878	0.048	0.025	2458.32
Iqcg	0.0569871	0.108727	0.03	0	694.559
Rpl36a-ps1	0.329356	0.10872	0.036	0.017	2490.26
Tdp1	0.208707	0.108707	0.03	0.008	2059.32
Stat1	0.32433	0.108659	0.036	0.017	2474.96
Iffo1	0.93068	0.108654	0.06	0.059	567.715
Golga3	0.495443	0.108643	0.096	0.076	2411.32
Lbr	0.878271	0.108536	0.036	0.034	901.106
Ercc1	0.210837	0.108511	0.03	0.008	2076.11
Mettl25	0.490051	0.108452	0.018	0.008	2441.92
Vopp1	0.825002	0.108202	0.102	0.118	1144.28
Gpaa1	0.462725	0.108158	0.09	0.067	2407.56
Adgra3	0.204495	0.107973	0.03	0.008	2028.79
Trappc13	0.532037	0.107909	0.066	0.05	2428.75
Cln5	0.938208	0.107884	0.066	0.067	504.756
Bin1	0.818332	0.107841	0.337	0.353	1388.71
Rraga	0.884628	0.107831	0.151	0.151	867.821
Chmp1b	0.432985	0.107813	0.042	0.025	2338.12
Topbp1	0.971816	0.1078	0.024	0.025	190.476
[truncated: 11,878 more rows]

## Sheet: P50FvsP50M_Vgat2
	p_val	avg_logFC	pct.1	pct.2	p_val_adjust
Xist	2.63113e-38	2.01763	1	0	3.86276e-34
Rgs4	2.65496e-09	0.756337	0.771	0.41	3.89589e-05
Pcp4	1.68633e-15	0.752568	1	0.99	2.47536e-11
Esr1	5.7668e-11	0.668511	0.892	0.619	8.46336e-07
Rps27rt	3.91679e-13	0.581611	0.952	0.829	5.74907e-09
Socs2	3.8358e-08	0.539657	0.506	0.143	0.000562635
Penk	0.0306816	0.538528	0.277	0.162	417.607
Ptprk	3.56417e-06	0.505859	0.639	0.343	0.0521829
Slc18a2	5.34947e-06	0.486613	0.229	0.019	0.0782948
Serpini1	3.95485e-06	0.478615	0.675	0.39	0.0578912
Bcl11a	4.2205e-05	0.462119	0.578	0.324	0.616151
Cdh13	0.000140702	0.435616	0.687	0.486	2.04792
Pgr15l	0.00114608	0.424211	0.361	0.181	16.5459
Sccpdh	9.47142e-05	0.397562	0.795	0.619	1.38055
Maf	2.8657e-05	0.396475	0.325	0.095	0.418506
Ldb2	1.72755e-07	0.392144	0.542	0.19	0.0025331
Rorb	1.39281e-05	0.391983	0.578	0.267	0.203573
Gda	4.96673e-05	0.385503	0.723	0.41	0.724795
Wdr89	0.000117888	0.372409	0.699	0.476	1.71668
Mgat4c	0.000137236	0.365816	0.59	0.352	1.99774
Sox11	0.000411736	0.360477	0.892	0.781	5.97882
Tmem158	0.00372406	0.358399	0.928	0.752	53.3024
Tead1	0.000191456	0.354739	0.398	0.171	2.78416
Meg3	3.46935e-07	0.345148	1	1	0.00508572
Neo1	0.041634	0.342241	0.542	0.438	557.23
Slc24a5	0.00107698	0.340367	0.687	0.514	15.5614
Tmem255a	5.61083e-05	0.339205	0.964	0.867	0.81862
Asb4	0.00010392	0.334118	0.398	0.162	1.51411
Msi2	1.05486e-05	0.333082	0.651	0.352	0.154241
Spop	5.41676e-05	0.330272	0.843	0.705	0.790359
Luzp2	0.000289621	0.327364	0.373	0.152	4.20935
Negr1	0.000681145	0.31707	0.988	0.924	9.87252
Efna5	0.00386081	0.316016	0.843	0.79	55.2366
Ogt	0.000114091	0.313142	0.988	0.952	1.66162
Ntng1	0.00192472	0.308853	0.88	0.819	27.7141
Stmn1	8.8781e-05	0.307374	0.988	0.924	1.29425
Amer2	0.00204825	0.307008	0.59	0.429	29.4804
Dbpht2	0.0217205	0.305935	0.506	0.419	300.178
Gm13889	0.00160471	0.304837	0.482	0.267	23.1255
Hlf	0.017989	0.300462	0.542	0.419	249.957
Elavl4	0.000828559	0.296301	0.976	0.933	11.995
Ctcf	0.000341269	0.29494	0.554	0.371	4.95761
Plp1	6.52566e-05	0.294738	0.639	0.362	0.951636
Mrap2	0.000838862	0.292498	0.59	0.343	12.1425
Rab10os	0.000528939	0.291155	0.41	0.19	7.67278
Adarb2	0.00018711	0.290195	0.578	0.314	2.72151
Arid4a	0.00269229	0.289804	0.831	0.743	38.6559
Lman2l	9.73431e-05	0.285859	0.675	0.438	1.41868
Galnt14	8.48262e-05	0.285825	0.398	0.152	1.23677
Gabre	0.0161441	0.285779	0.434	0.314	225.21
1810041L15Rik	0.00286821	0.28544	0.675	0.524	41.1589
Mrps33	0.000922643	0.284446	0.711	0.533	13.3433
Sumo2	4.55059e-05	0.282901	0.976	0.905	0.664158
Papola	0.000569754	0.282643	0.819	0.667	8.262
Sgpp1	0.000101342	0.281714	0.675	0.429	1.47665
Unc5d	0.00665845	0.278928	0.867	0.895	94.55
Srsf5	0.000105189	0.278224	0.928	0.867	1.5325
Alcam	0.0208042	0.278175	0.783	0.638	287.889
Gm5914	6.25047e-05	0.276078	0.337	0.105	0.911694
Gm44643	1.53797e-06	0.274669	0.337	0.067	0.0225252
Hmgn1	0.00111591	0.274034	0.964	0.848	16.116
Foxo1	0.00260397	0.273099	0.181	0.048	37.4061
Gm26699	0.000377045	0.272963	0.614	0.39	5.4762
Cggbp1	0.00121416	0.270981	0.723	0.543	17.5167
Pcdh9	0.000921026	0.269591	0.639	0.448	13.3208
Nr3c1	0.00339808	0.268196	0.639	0.467	48.6877
Mtpn	0.000504113	0.265809	0.94	0.914	7.31568
Prpf4b	0.00142885	0.263671	0.759	0.629	20.604
Serf1	0.00112576	0.262963	0.59	0.41	16.2571
Npy2r	0.0254063	0.262745	0.687	0.552	348.752
Cbln2	0.813315	0.262414	0.205	0.21	1798.24
Fnbp1l	0.00701198	0.26182	0.747	0.724	99.4999
Ptma	2.51596e-05	0.261196	1	0.99	0.367531
Pnisr	0.000140137	0.261119	0.964	0.895	2.03983
Foxg1	0.0271107	0.261058	0.614	0.495	371.118
Chd3os	9.9389e-06	0.258915	0.988	1	0.145337
Bax	0.00118648	0.257576	0.602	0.41	17.1221
Marcks	1.16077e-05	0.257285	0.988	0.952	0.169693
Tmem132c	0.00114994	0.256333	0.181	0.038	16.5994
Cdh11	0.00110943	0.254316	0.398	0.2	16.0234
Rad21	0.000890329	0.253979	0.663	0.476	12.8822
Smpd3	0.00115106	0.25378	0.458	0.238	16.6143
Ankra2	0.0100494	0.253474	0.651	0.533	141.757
Tia1	0.000435293	0.252525	0.952	0.905	6.31958
N4bp2	0.0110079	0.250723	0.398	0.248	154.969
Pard3	0.00184404	0.249329	0.458	0.257	26.556
Chordc1	0.000839013	0.247626	0.711	0.552	12.1439
M6pr	0.000382665	0.24641	0.675	0.467	5.55706
Rpl30	6.23185e-06	0.246383	1	0.99	0.0911844
Arhgef9	0.00360383	0.244838	0.807	0.705	51.6105
Gm44644	0.00101739	0.244745	0.916	0.81	14.7073
Mef2c	0.0184938	0.244605	0.217	0.095	256.861
Cenpx	0.00403914	0.24431	0.361	0.2	57.7395
Tra2a	0.000173989	0.243611	0.916	0.876	2.53119
Ankrd12	0.00074491	0.243569	0.916	0.829	10.7908
Rmst	0.0004917	0.242737	0.723	0.457	7.13703
Cnot6l	0.0306087	0.240799	0.542	0.438	416.707
Calcr	0.00115976	0.240743	0.277	0.086	16.7388
Nectin3	0.0107787	0.238337	0.446	0.286	151.796
1810037I17Rik	0.000756194	0.2377	0.783	0.61	10.9527
D10Wsu102e	0.0142522	0.235597	0.542	0.381	199.417
Ndst4	0.00400758	0.232763	0.253	0.105	57.3085
Rps12	0.000258899	0.232257	1	1	3.76335
Smim26	0.00235212	0.230984	0.783	0.657	33.8188
Rpl13a	0.000341282	0.230793	0.988	1	4.95747
Gtf3c4	0.000541524	0.230715	0.458	0.229	7.85481
Flrt3	0.197611	0.229965	0.361	0.295	2136.38
Mecp2	0.00968195	0.227594	0.795	0.619	136.699
Crtc3	0.00222967	0.227517	0.349	0.181	32.076
Mmp16	0.00119843	0.227115	0.361	0.162	17.2934
AC149090.1	0.0248575	0.226944	0.867	0.848	341.492
Malat1	0.000114751	0.226588	1	1	1.67112
Sdhaf1	0.00597328	0.226273	0.506	0.324	84.9281
Nsa2	0.00538043	0.225063	0.747	0.552	76.6496
Sumo1	0.00205485	0.223737	0.904	0.867	29.5733
Mamld1	0.000439399	0.223253	0.325	0.124	6.37876
Stk19	0.0524136	0.223192	0.518	0.39	685.937
Yy1	0.000239456	0.223173	0.614	0.381	3.48169
Zdhhc2	0.00868337	0.222722	0.687	0.495	122.818
Pcmtd1	0.00836092	0.222375	0.699	0.543	118.307
Rbm39	4.35376e-05	0.221879	1	0.981	0.635475
Gpatch8	0.0276708	0.221083	0.554	0.476	378.454
Dynll1	0.000515478	0.220658	1	0.924	7.47958
Dab1	0.000740003	0.218857	0.506	0.286	10.7204
Polr2f	0.00114828	0.218782	0.711	0.495	16.5766
Pbx3	0.716147	0.218025	0.205	0.2	2358.99
Eif2s3x	0.0055053	0.21776	0.819	0.6	78.412
Vstm2a	0.178544	0.216775	0.651	0.648	1973.27
Pcm1	0.000522856	0.215867	0.807	0.571	7.58612
Lrif1	0.0370847	0.215837	0.494	0.41	499.976
Chmp3	0.00354476	0.215498	0.771	0.533	50.7716
D1Ertd622e	0.0104257	0.215195	0.349	0.21	146.94
Rap1gap	0.0819469	0.215147	0.735	0.724	1033.92
Fhl1	0.0279756	0.214531	0.675	0.571	382.37
Srsf11	0.00309895	0.213757	0.916	0.8	44.442
Mal2	0.0132492	0.213486	0.663	0.514	185.727
Syne2	0.0100646	0.212913	0.349	0.19	141.961
Rbm7	0.00104583	0.212737	0.458	0.248	15.1164
Nnat	0.0112309	0.212504	0.952	0.876	157.985
Tmem108	0.0144441	0.212393	0.602	0.476	202.001
Ube3a	3.94297e-05	0.211789	1	1	0.575674
Ostc	0.0242313	0.21118	0.53	0.352	333.107
Sdk2	0.0438707	0.211009	0.41	0.286	585.103
Hsph1	0.00233834	0.210803	0.988	0.914	33.6229
Taf1d	0.0198949	0.210317	0.651	0.524	275.664
Nkx2-1	0.00259977	0.210191	0.253	0.095	37.3508
Rnpc3	0.000898473	0.209987	0.422	0.219	12.9982
Dgkb	0.109033	0.209222	0.711	0.657	1330.2
Stam	0.00295953	0.208076	0.578	0.39	42.4633
Chic2	0.0027954	0.207687	0.518	0.324	40.1252
H2afv	0.0567685	0.2068	0.47	0.362	739.296
Necab1	0.279455	0.206106	0.349	0.314	2502.8
Rbms3	0.0120971	0.205905	0.482	0.324	169.892
Rab26os	0.00387067	0.205608	0.518	0.333	55.3739
Pum2	0.00684595	0.205242	0.819	0.714	97.1646
Spg21	0.000416238	0.204979	0.349	0.133	6.04377
Cetn3	0.0084778	0.204237	0.783	0.686	119.935
Pou2f2	0.0694145	0.203898	0.614	0.505	891.629
Fry	0.0130873	0.203389	0.831	0.705	183.471
Tubgcp3	0.00230958	0.203309	0.349	0.181	33.2164
Inpp4b	0.035474	0.203077	0.373	0.238	479.608
Lpcat1	0.0258106	0.202459	0.434	0.324	353.967
Raph1	0.0391092	0.202346	0.723	0.629	525.705
Thsd7a	0.035586	0.201915	0.41	0.286	480.909
Ssbp2	0.254078	0.201485	0.566	0.495	2521.47
Brwd1	0.0101742	0.201356	0.723	0.648	143.487
Sec61a1	0.0265842	0.200804	0.518	0.4	364.15
2810004N23Rik	0.0122702	0.200596	0.554	0.381	172.261
2510002D24Rik	0.00385809	0.200345	0.446	0.257	55.2016
Gm42851	0.011417	0.200288	0.47	0.324	160.546
B230209E15Rik	0.00365029	0.199761	0.94	0.876	52.2613
Pcsk2	0.15883	0.199658	0.41	0.333	1800.33
Son	0.00829539	0.199346	0.976	0.962	117.413
Prdx6	0.00672283	0.199273	0.446	0.276	95.4373
Zfp622	0.00631664	0.199202	0.687	0.486	89.7531
Sra1	0.0325351	0.199155	0.446	0.324	441.599
Mrpl27	0.00133472	0.199095	0.434	0.219	19.2507
Ercc6l2	0.00108317	0.198007	0.253	0.076	15.6475
Igf2bp3	0.0166636	0.197886	0.843	0.752	232.224
Edil3	0.0487823	0.197697	0.675	0.648	644.902
Phldb1	0.0729125	0.197678	0.193	0.114	932.623
Zbtb20	0.0536215	0.197675	0.916	0.867	700.78
Fbxo11	0.0320335	0.197218	0.711	0.619	435.175
Grin2b	0.00307646	0.196013	0.964	0.914	44.1225
Il1rap	0.105475	0.195645	0.47	0.362	1293.65
Araf	0.00175799	0.195288	1	0.952	25.3239
Olfm3	0.0196278	0.195161	0.59	0.457	272.022
Rcan3	0.0140902	0.194939	0.506	0.381	197.235
Cdh8	0.0315825	0.194868	0.542	0.381	429.238
R3hdm1	0.00305446	0.194785	0.88	0.8	43.8101
Itih5	0.0026536	0.194762	0.108	0.01	38.1084
Tmcc3	0.0749593	0.194651	0.771	0.705	954.007
1700037H04Rik	0.0266346	0.194529	0.566	0.457	364.814
Ate1	0.0185456	0.194166	0.819	0.79	257.561
Pcdh11x	0.0245566	0.193866	0.759	0.629	337.506
Hypk	0.017362	0.193781	0.783	0.676	241.506
Slc25a44	0.0119612	0.193743	0.578	0.429	168.043
Scg2	0.0108345	0.193629	1	1	152.561
Pcbp2	0.00383825	0.19346	0.964	0.914	54.9216
Zfr	0.0072216	0.192995	0.928	0.848	102.402
B230219D22Rik	0.0121091	0.19243	0.88	0.829	170.036
Cstf3	0.0407684	0.192208	0.53	0.448	546.337
Arid5b	0.0167734	0.191675	0.386	0.229	233.67
Srsf7	0.0121014	0.191604	0.699	0.543	169.94
Zfp9	0.017339	0.190285	0.434	0.276	241.255
Dph7	0.000776913	0.189188	0.301	0.105	11.252
Ythdc1	0.0125222	0.189126	0.867	0.733	175.737
Gm16105	0.000939532	0.188749	0.265	0.086	13.5866
Ilf2	0.0379988	0.187457	0.614	0.486	511.691
Atrx	0.0339418	0.187406	0.735	0.619	459.776
Gigyf2	0.0115751	0.187316	0.675	0.533	162.722
Il1rapl2	0.000124726	0.187302	0.157	0.01	1.81614
Snrnp70	0.00489188	0.187223	0.964	0.933	69.7436
Znhit1	0.0401266	0.187077	0.735	0.571	538.299
Rbm4b	0.0266856	0.186722	0.783	0.733	365.486
Mad2l2	0.00441535	0.186708	0.313	0.143	63.0379
Psma3	0.00569603	0.186598	0.916	0.857	81.0659
Foxk1	0.00374901	0.186278	0.313	0.133	53.6558
Rc3h2	0.0173482	0.186223	0.651	0.505	241.331
Zfpm2	0.000749104	0.185922	0.229	0.057	10.8508
Thap3	0.0150042	0.185834	0.566	0.429	209.698
Ddx3x	0.00333031	0.185522	0.952	0.857	47.7267
Fam208a	0.0369351	0.1846	0.434	0.295	497.995
Hnrnpa2b1	0.000726294	0.184515	0.952	0.962	10.5233
Ccp110	0.033814	0.184389	0.434	0.333	458.112
Nos1ap	0.0628691	0.18438	0.614	0.581	813.527
Sdf2l1	0.00805874	0.184363	0.229	0.095	114.104
Slc6a1	0.020225	0.184228	0.867	0.79	280.116
Erp29	0.012624	0.184176	0.855	0.819	177.115
Ehmt1	0.00584445	0.184156	0.41	0.229	83.1139
Rasgrf1	0.129373	0.184153	0.614	0.581	1512.37
Ift46	0.0041417	0.184149	0.446	0.257	59.1849
Ddx18	0.0745613	0.184107	0.361	0.267	949.389
Nktr	0.0447664	0.1841	0.843	0.838	595.841
Tceal3	0.0386192	0.184002	0.783	0.629	519.429
C2cd5	0.028756	0.18386	0.614	0.476	392.663
Fnta	0.0057983	0.183503	0.566	0.371	82.4808
Fam46a	0.0129482	0.183067	0.386	0.219	181.547
Svip	0.00678074	0.182983	0.518	0.352	96.2459
Wsb1	0.0248796	0.182962	0.566	0.41	341.747
Kpna3	0.0607452	0.182873	0.663	0.581	787.622
Mrpl32	0.01706	0.182579	0.53	0.381	237.492
Tvp23b	0.0321423	0.182428	0.361	0.238	436.621
Ccdc12	0.0195769	0.181916	0.566	0.448	271.374
Mtss1	0.0895215	0.181817	0.663	0.619	1120
2410089E03Rik	0.0581415	0.181758	0.602	0.495	756.188
Cops8	0.0238663	0.180947	0.783	0.61	328.281
Itfg2	0.0174373	0.180931	0.578	0.429	242.535
Trpm7	0.0147084	0.180314	0.458	0.276	205.652
Plxnc1	0.034502	0.180045	0.663	0.552	466.95
Ube2w	0.0205528	0.179623	0.566	0.41	284.492
Bcat1	0.0121664	0.179456	0.639	0.514	170.829
Ypel1	0.0404695	0.179229	0.229	0.124	542.655
Arpc5l	0.0128987	0.179061	0.855	0.771	180.866
Ssr3	0.0324459	0.178793	0.759	0.695	440.517
Dgkg	0.00803711	0.178646	0.301	0.162	113.805
Stx6	0.0144115	0.178629	0.422	0.276	201.56
Maoa	0.0385773	0.178587	0.53	0.41	518.942
4930447C04Rik	0.0296774	0.178428	0.289	0.162	404.711
Slc38a9	0.00661282	0.178145	0.614	0.4	93.9087
Mtf2	0.0111743	0.177923	0.627	0.457	157.212
Krt1	0.0672445	0.177812	0.711	0.619	865.706
Brd9	0.0138202	0.177765	0.602	0.438	193.566
Tub	0.0621127	0.177645	0.867	0.838	804.36
Lrfn5	0.00466523	0.177637	0.952	0.905	66.5635
Golph3	0.0283451	0.177162	0.663	0.543	387.194
Atp6v0b	0.0421921	0.176978	0.916	0.924	564.024
Ubac2	0.00790066	0.176055	0.434	0.238	111.905
Zfp608	0.00012959	0.175848	0.217	0.038	1.8867
Rims2	0.0888263	0.175766	0.675	0.619	1112.46
Zfp462	0.0141379	0.175704	0.783	0.705	197.889
Gmps	0.00579354	0.175145	0.904	0.762	82.4189
Rpl27-ps3	0.0802344	0.174787	0.41	0.305	1014.08
Abraxas2	0.0438798	0.174552	0.53	0.381	585.181
Samd5	0.013784	0.174513	0.566	0.39	193.073
Polr2k	0.00436075	0.173964	0.747	0.619	62.2758
Smim1	0.102263	0.17396	0.337	0.248	1259.99
Zfp148	0.06043	0.173854	0.53	0.438	783.898
Chuk	0.0193899	0.173528	0.554	0.419	268.821
Tbcel	0.0108765	0.172642	0.446	0.286	153.141
Cspp1	0.0158402	0.171707	0.566	0.4	221.097
Trp53inp1	0.00943113	0.171553	0.157	0.048	133.224
Anp32e	0.0114081	0.171419	0.434	0.267	160.432
Plxna2	0.062672	0.171394	0.639	0.562	811.289
Dzip1	0.0315809	0.171351	0.602	0.467	429.248
Creb1	0.0310592	0.171094	0.373	0.238	422.529
Gmpr2	0.000681759	0.171054	0.253	0.076	9.88073
Cfdp1	0.0365381	0.170864	0.687	0.571	493.155
Rsbn1	0.0238639	0.170824	0.53	0.419	328.271
Nol4	0.108935	0.169113	0.675	0.552	1329.23
Usp29	0.0117001	0.168871	0.988	0.943	164.433
Crocc	0.0382553	0.168231	0.458	0.324	514.802
Cpsf2	0.000917151	0.167778	0.578	0.333	13.2666
Pak2	0.026452	0.167509	0.41	0.305	362.445
Klhl29	0.00840318	0.167388	0.446	0.257	118.897
Nell1	0.518883	0.167383	0.651	0.657	2713.24
BC030500	0.0332463	0.167341	0.373	0.267	450.82
Ubxn7	0.0336841	0.166888	0.434	0.333	456.487
Slit2	0.00460465	0.166821	0.265	0.105	65.7084
Hadha	0.0716968	0.166734	0.373	0.267	918.508
Sec61a2	0.0191081	0.166584	0.819	0.657	265.048
Sdhaf4	0.00263143	0.16656	0.47	0.238	37.7979
Fgf14	0.0533653	0.166329	0.337	0.238	697.645
C1d	0.0241738	0.166076	0.94	0.905	332.342
Myg1	0.00253412	0.166019	0.313	0.133	36.4153
Ftx	0.0172754	0.165785	0.241	0.114	240.405
Ptprd	0.179514	0.165685	0.735	0.714	1981.3
Mtch2	0.0100207	0.165515	0.711	0.505	141.393
Brd4	0.0496728	0.165457	0.711	0.61	655.533
Cpne7	0.106362	0.165341	0.398	0.314	1302.29
Fut8	0.104238	0.165297	0.699	0.59	1280.88
Ybx1	0.130396	0.165225	0.639	0.543	1521.72
Cntn5	0.447296	0.165208	0.217	0.19	2761.16
Hook2	0.203646	0.165164	0.386	0.324	2191.03
Ubn1	0.0588722	0.164909	0.325	0.229	765.279
mt-Nd3	0.000523565	0.164753	1	0.99	7.59588
Fam53b	0.00218037	0.16437	0.217	0.067	31.3689
Rpl36al	0.00849659	0.164333	0.904	0.895	120.193
Sos2	0.106098	0.164329	0.41	0.295	1299.7
Tcf4	0.0927044	0.164267	0.398	0.295	1156.67
Pcif1	0.014327	0.164251	0.554	0.352	200.434
Gtf3c3	0.0618559	0.163922	0.337	0.238	801.281
Abcg1	0.00833859	0.163801	0.446	0.286	118.008
Rasgrp1	0.0649645	0.163738	0.277	0.19	838.302
Dzip3	0.00671577	0.163572	0.892	0.79	95.3438
Thap2	0.010994	0.163427	0.578	0.371	154.785
Zscan26	0.0309617	0.163363	0.675	0.533	421.234
Prdm2	0.00390549	0.163279	0.337	0.162	55.868
Rsf1	0.0092646	0.163244	0.711	0.486	130.909
Snhg11	6.04806e-05	0.16321	1	1	0.882231
Cd2ap	0.0127296	0.16318	0.313	0.162	178.533
Plekha1	0.0496408	0.163106	0.422	0.295	655.159
Klhl24	0.0640543	0.163074	0.578	0.467	827.517
Cmc4	0.000917469	0.163013	0.229	0.067	13.2703
Fndc3a	0.0262002	0.162997	0.759	0.638	359.126
Blvra	0.0120779	0.162874	0.265	0.133	169.659
Bcl10	0.00364148	0.162874	0.217	0.076	52.1423
Gabra4	0.0578623	0.162853	0.398	0.276	752.615
Ryk	0.0451093	0.162299	0.325	0.21	599.142
Zcchc12	0.0444823	0.162029	1	0.971	592.46
1700003E16Rik	0.000849021	0.161257	0.193	0.038	12.287
Mtus1	0.0397743	0.161178	0.325	0.21	533.931
H2afz	0.022263	0.161139	0.928	0.829	307.363
Fndc9	0.0178535	0.161135	0.651	0.457	248.164
Atf2	0.0027117	0.161035	0.843	0.752	38.9319
Pak7	0.111324	0.160738	0.422	0.352	1354.26
Tmem33	0.0540544	0.16022	0.542	0.448	705.951
Slc16a2	0.00396429	0.160133	0.157	0.038	56.6973
Abhd17b	0.0849453	0.160066	0.373	0.276	1068.61
Btbd10	0.0250851	0.159768	0.41	0.305	344.444
Safb	0.082557	0.159708	0.554	0.467	1041.04
Prune2	0.118309	0.159673	0.639	0.571	1407.76
Rufy3	0.0183644	0.159655	0.928	0.924	255.1
Nmt1	0.0425713	0.159545	0.735	0.638	568.625
Nyap2	0.262054	0.159401	0.325	0.276	2576.25
Ccar1	0.0369158	0.158604	0.566	0.438	497.772
Tpst2	0.00407857	0.158415	0.229	0.086	58.295
Snw1	0.0407684	0.157639	0.542	0.438	546.296
Erc1	0.0463965	0.157362	0.446	0.343	615.31
Gm2000	0.121751	0.157295	0.554	0.467	1443.97
Arfgef3	0.0167197	0.157273	0.988	0.962	232.956
Med28	0.0365647	0.157248	0.94	0.848	493.441
Fbxl6	0.00302156	0.157232	0.253	0.095	43.3473
Zfp553	0.0874649	0.157179	0.349	0.276	1097.16
Map3k2	0.0655339	0.156693	0.349	0.267	845.06
Gpbp1	0.0521686	0.156673	0.699	0.657	683.148
Emc10	0.13586	0.156325	0.747	0.714	1576.52
Gpr83	0.1475	0.156096	0.422	0.343	1689.9
Il1rapl1	0.129346	0.155842	0.386	0.305	1512.31
Gucy1a1	0.079758	0.155814	0.265	0.162	1008.86
St13	0.175781	0.1558	0.855	0.876	1950.46
Zim1	0.0791663	0.155786	0.422	0.305	1002.25
Zbtb7c	0.00427748	0.155535	0.253	0.095	61.1038
Hook1	0.0303257	0.155241	0.711	0.552	413.067
Fis1	0.0115763	0.155212	0.904	0.905	162.728
Pum1	0.0447366	0.155211	0.819	0.714	595.489
Ankrd10	0.0267108	0.155195	0.554	0.381	365.804
Tigar	0.124606	0.154949	0.361	0.267	1464.37
Nck1	0.0248718	0.154721	0.361	0.238	341.665
Il6st	0.0210952	0.154594	0.349	0.21	291.705
Ntm	0.0674406	0.154547	0.831	0.743	868.028
Alg10b	0.0409341	0.154232	0.349	0.229	548.354
Hnrnph3	0.073763	0.153603	0.518	0.381	942.101
Pnn	0.0877205	0.153474	0.747	0.695	1100.02
Anapc13	0.0812983	0.153418	0.651	0.562	1026.39
Mafa	0.0037202	0.153125	0.145	0.029	53.2547
Tmem65	0.0642592	0.153028	0.458	0.333	829.907
Lig4	0.0358214	0.152835	0.265	0.152	483.947
Hnrnpf	0.0423069	0.15275	0.349	0.21	565.432
Rdx	0.0932143	0.152731	0.518	0.4	1162.29
Magi2	0.17312	0.152527	0.482	0.419	1928.21
Fhad1	0.0960226	0.152477	0.313	0.219	1193.37
Timm10	0.00375608	0.15223	0.458	0.257	53.7532
Cept1	0.0301434	0.152073	0.446	0.305	410.764
Mat2a	0.130491	0.15186	0.892	0.838	1522.57
Cpsf7	0.0220697	0.151852	0.518	0.39	304.782
Brd3	0.0306967	0.151471	0.735	0.638	417.783
Prrt1	0.0796638	0.151293	0.711	0.629	1007.83
Zfp846	0.0558231	0.151105	0.663	0.6	727.654
Cntnap5a	0.382461	0.150721	0.675	0.676	2722.36
Prpsap2	0.145457	0.150669	0.325	0.248	1669.99
Trpc7	0.0305288	0.150668	0.289	0.162	415.71
Kcnh7	0.0546118	0.150486	0.265	0.152	712.738
Arhgap6	0.170067	0.15044	0.181	0.114	1903.4
Gtf2h5	0.0351161	0.150338	0.735	0.619	474.91
Lrrc58	0.140257	0.150205	0.675	0.638	1618.85
Nkd2	0.00957952	0.14982	0.145	0.038	135.282
Akap9	0.0500917	0.14973	0.904	0.838	660.709
Arhgap44	0.133299	0.149709	0.627	0.571	1550.8
2700069I18Rik	0.0165215	0.149664	0.205	0.086	230.326
Rpl9-ps6	0.0731239	0.149118	0.482	0.4	934.889
Zfp326	0.0337766	0.148931	0.422	0.305	457.674
Osbpl8	0.106142	0.148916	0.542	0.438	1299.92
Trappc2	0.0495831	0.148681	0.494	0.381	654.447
Rbbp6	0.214773	0.148363	0.855	0.867	2214.74
Rabgap1	0.0549647	0.148293	0.687	0.6	717.234
Nat14	0.0544616	0.148089	0.494	0.39	710.832
Gtf2a2	0.0135118	0.148017	0.687	0.495	189.367
Cacng5	0.350185	0.147758	0.301	0.248	2864.51
Gphn	0.00486302	0.147548	0.59	0.362	69.3369
Ppp6c	0.0399218	0.147444	0.518	0.343	535.791
Emsy	0.028107	0.147425	0.602	0.448	384.082
Gm4419	0.00107418	0.147398	0.145	0.019	15.5219
Ralyl	0.0710402	0.147398	0.614	0.486	911.02
Krt77	0.0142462	0.147139	0.193	0.076	199.348
Rbpj	0.014281	0.147138	0.337	0.19	199.805
Tmem167	0.0424997	0.146897	0.602	0.505	567.796
Rad9b	0.0114671	0.146768	0.253	0.114	161.238
Slirp	0.0550107	0.146493	0.783	0.743	717.724
Cacna2d2	0.0810264	0.146394	0.843	0.8	1023.36
Sox4	0.183393	0.146355	0.614	0.524	2013.29
Srek1	0.0335388	0.146316	0.687	0.571	454.653
Rnf7	0.0481723	0.1463	0.855	0.752	637.175
Myef2	0.154518	0.146235	0.759	0.714	1758.72
2010005H15Rik	0.0452176	0.146215	0.434	0.286	600.535
Oard1	0.0130413	0.145965	0.205	0.086	182.839
Mrpl43	0.0399854	0.145838	0.566	0.41	536.564
Usp40	0.0722605	0.145562	0.458	0.324	925.151
Timm13	0.050257	0.145405	0.819	0.705	662.538
Gm14295	0.0222332	0.14538	0.265	0.143	306.973
Rpl5	0.0235371	0.145157	0.988	0.962	324.459
Rbm26	0.0827673	0.14515	0.602	0.533	1043.28
Rnf138rt1	0.00101212	0.145133	0.181	0.038	14.6322
Nim1k	0.113176	0.1448	0.265	0.181	1355.06
Nbeal1	0.151116	0.144708	0.506	0.467	1726.8
Mia3	0.100136	0.144674	0.554	0.448	1237.38
Mpnd	0.0477222	0.144563	0.47	0.343	631.747
Fam220a	0.0202374	0.144209	0.602	0.429	280.268
Pkig	0.0397951	0.144176	0.831	0.752	534.169
Sox5	0.163435	0.144103	0.289	0.21	1844.86
Fam98b	0.153931	0.143565	0.373	0.276	1753.12
Dpysl3	0.0491388	0.143502	0.59	0.543	649.124
Hltf	0.0342604	0.143331	0.301	0.181	463.851
Bcas2	0.110885	0.14294	0.687	0.6	1350.03
Trpm4	0.0445258	0.142939	0.205	0.105	592.95
Grik2	0.0551285	0.142853	0.434	0.295	718.986
Tmem161b	0.0103559	0.142804	0.229	0.095	145.967
Csad	0.046458	0.142442	0.229	0.124	616.079
Senp8	0.012572	0.142358	0.301	0.152	176.423
Mier1	0.0946175	0.142346	0.482	0.381	1177.52
Ascc1	0.0300288	0.142315	0.265	0.143	409.293
1700023F06Rik	0.104282	0.142235	0.446	0.362	1281.21
Rcbtb1	0.0424677	0.142095	0.458	0.324	567.411
Rbm25	0.0996614	0.141905	0.88	0.829	1233.11
Sulf1	0.11032	0.1419	0.229	0.143	1344.02
Matr3	0.0181883	0.141533	1	0.962	252.672
Bmt2	0.0523496	0.141434	0.482	0.371	685.256
Kmt2e	0.0309606	0.141367	0.867	0.724	421.25
Socs4	0.099965	0.141135	0.229	0.143	1235.57
Ptch1	0.0272447	0.141021	0.289	0.162	372.871
Grm5	0.0860369	0.140913	0.735	0.686	1080.97
Peli1	0.0518758	0.140905	0.506	0.4	679.469
Zfp329	0.0726005	0.140764	0.627	0.543	929.141
Naa35	0.0179226	0.140715	0.639	0.486	249.088
Klhl7	0.0305792	0.140705	0.711	0.581	416.335
Znhit2	0.0360564	0.140649	0.386	0.257	486.978
Sgce	0.0618055	0.140585	0.301	0.2	800.752
Zxdc	0.0258302	0.140554	0.217	0.105	354.21
Zfp292	0.377821	0.140546	0.506	0.514	2993.1
Zfp24	0.031401	0.140478	0.289	0.162	426.96
Rpl10-ps3	0.0636295	0.140282	0.663	0.552	822.411
Spata7	0.0184834	0.140071	0.735	0.619	256.734
Naa15	0.0226636	0.140055	0.687	0.524	312.712
Grip1	0.0258098	0.139673	0.325	0.181	353.982
Pnoc	0.014075	0.139669	0.482	0.295	197.036
Grk3	0.20102	0.139465	0.361	0.295	2168
Slc17a6	0.161252	0.139375	0.072	0.029	1824.09
Stxbp5l	0.0529832	0.139248	0.446	0.314	692.968
Tcea1	0.0792886	0.139222	0.627	0.552	1003.63
Dnajb4	0.0488895	0.13894	0.759	0.676	646.27
Tet2	0.0581536	0.138764	0.337	0.238	756.288
Ago1	0.15478	0.138763	0.482	0.371	1761.4
Mier3	0.00739012	0.138728	0.313	0.143	104.785
Ahsa2	0.0339445	0.138681	0.398	0.257	459.778
Serpine2	0.0279045	0.138581	0.482	0.305	381.511
Isca1	0.0346836	0.138535	0.373	0.248	469.131
Hnrnpll	0.0918646	0.1385	0.349	0.267	1147.3
Pcdh8	0.184248	0.138462	0.41	0.333	2021.2
Mpped2	0.229729	0.13842	0.157	0.105	2331.75
Msi1	0.134953	0.138068	0.241	0.171	1567.35
Vma21	0.319352	0.137817	0.554	0.514	2704.59
Faf2	0.0648351	0.13779	0.434	0.324	836.762
Pex11b	0.111789	0.137785	0.386	0.305	1359.24
Bicd1	0.210441	0.137415	0.831	0.714	2182.69
Arf4	0.0932663	0.137409	0.735	0.686	1162.75
Eif3j1	0.065393	0.137354	0.566	0.457	843.309
Chrm2	0.0819993	0.137329	0.205	0.114	1034.5
Arfgap2	0.0415625	0.137306	0.47	0.324	556.356
Pde1c	0.238722	0.137237	0.59	0.571	2403.21
Ormdl1	0.0373745	0.137195	0.169	0.076	503.771
Cab39l	0.0294005	0.137128	0.361	0.229	401.17
Nxph1	0.0262223	0.136996	0.193	0.086	359.403
Csnk2a1	0.0720026	0.136864	0.59	0.514	922.281
Srsf1	0.0230988	0.136862	0.904	0.867	318.555
Tmem106b	0.0888131	0.13631	0.759	0.714	1112.38
Gtpbp2	0.0875237	0.136163	0.566	0.495	1097.72
Slc39a10	0.147678	0.136083	0.602	0.505	1691.51
Hadhb	0.0753462	0.135838	0.265	0.171	958.328
Tada1	0.132802	0.135788	0.349	0.267	1545.82
Hnrnpab	0.0366382	0.135669	0.819	0.762	494.286
Prkacb	0.0249847	0.135619	1	1	343.089
Rnf113a2	0.0056196	0.135581	0.265	0.114	80.0006
H3f3a	0.0627922	0.135576	0.819	0.743	812.72
Tcp1	0.0885992	0.13551	0.928	0.867	1110.06
Dscaml1	0.0891121	0.135499	0.241	0.152	1115.59
Srsf10	0.0799261	0.135319	0.771	0.714	1010.83
Smarce1	0.0282741	0.135295	0.542	0.4	386.309
Arrb2	0.0833855	0.135219	0.386	0.295	1050.16
Psmd10	0.0329931	0.135097	0.398	0.267	447.585
Zfp706	0.0884992	0.134949	0.867	0.886	1108.98
Gng5	0.0394149	0.134927	0.217	0.114	529.618
Ndufaf3	0.0460085	0.134896	0.578	0.438	610.349
Polr2j	0.0207196	0.134885	0.663	0.533	286.738
Fndc3b	0.0576207	0.134864	0.337	0.229	749.761
Thumpd1	0.177773	0.13474	0.446	0.4	1967.41
Tatdn1	0.101368	0.134731	0.711	0.733	1251.49
Ankle2	0.0311061	0.134623	0.313	0.19	423.136
Lsm6	0.0407774	0.13441	0.88	0.705	546.377
Pde4a	0.0283123	0.134348	0.494	0.362	386.775
Setd5	0.119566	0.134284	0.699	0.6	1420.44
Tmem258	0.098525	0.134211	0.41	0.324	1220.63
Pacsin2	0.101399	0.134052	0.301	0.219	1251.77
Ranbp2	0.0930648	0.133859	0.386	0.276	1160.7
Npc1	0.0488897	0.133703	0.373	0.257	646.225
Golga7	0.16054	0.133383	0.47	0.41	1816.84
Gm13830	0.0187242	0.133269	0.277	0.143	259.93
Jak1	0.073449	0.13315	0.627	0.562	938.311
Nop56	0.0478377	0.13315	0.807	0.695	633.18
Polr3gl	0.0304226	0.13314	0.337	0.21	414.295
Mllt3	0.0358709	0.133129	0.446	0.314	484.58
Chml	0.0754685	0.132982	0.349	0.238	959.507
Mrpl1	0.0137114	0.132905	0.265	0.124	192.083
Spred1	0.0800036	0.132712	0.735	0.667	1011.57
Rgs9	0.244897	0.132659	0.277	0.219	2452.16
Fermt2	0.0571209	0.132649	0.301	0.181	743.6
Per3	0.166315	0.132593	0.458	0.371	1871.54
Zfp524	0.000609833	0.132577	0.133	0.01	8.84197
Pfdn6	0.125469	0.132554	0.386	0.295	1473.38
B230334C09Rik	0.0352976	0.132548	0.711	0.59	477.258
Tmem57	0.126395	0.132486	0.699	0.629	1483.12
Serinc5	0.0418252	0.132104	0.205	0.105	559.412
Paxbp1	0.0187575	0.131923	0.494	0.343	260.354
Lsm5	0.0301138	0.131883	0.482	0.352	410.39
Smarca1	0.112837	0.131805	0.578	0.495	1352.01
Mesd	0.100304	0.131768	0.614	0.533	1239.16
Rtl5	0.0979993	0.131614	0.506	0.448	1215.09
Ssna1	0.0135338	0.131449	0.639	0.467	189.662
Eid2b	0.0755859	0.131427	0.289	0.19	960.924
Gpr85	0.046166	0.131304	0.59	0.429	612.392
Ralbp1	0.0380014	0.131282	0.928	0.838	511.689
Rpl27	0.123909	0.131268	0.952	0.962	1457.3
Pcdh19	0.163261	0.131197	0.47	0.39	1843.38
Mlh3	0.0321878	0.131167	0.205	0.095	437.208
Ccdc66	0.0429294	0.13115	0.253	0.143	573.193
Rpp38	0.00624754	0.131146	0.157	0.038	88.7901
Fam19a1	0.113841	0.130935	0.12	0.057	1361.32
Sema3e	0.00672904	0.130927	0.133	0.029	95.5187
Ccdc28a	0.165798	0.130916	0.313	0.238	1866.55
Slc24a2	0.123888	0.130819	0.614	0.552	1457.17
Sema6a	0.0938536	0.130768	0.325	0.229	1169.32
Knop1	0.0996523	0.130766	0.518	0.39	1233.1
Srpk1	0.130748	0.130684	0.542	0.438	1524.91
Inpp5k	0.0136225	0.130653	0.253	0.114	190.864
Hpf1	0.0176902	0.130616	0.831	0.667	245.982
Taok3	0.0908835	0.130475	0.843	0.829	1136.23
B4galt5	0.0843995	0.130462	0.446	0.324	1062
Cnep1r1	0.0589286	0.130295	0.373	0.257	765.895
Ppp3ca	0.140554	0.130288	1	0.99	1621.71
Mzt1	0.094771	0.130204	0.663	0.61	1179.33
Snx29	0.0449858	0.13018	0.217	0.114	598.626
Gabrg1	0.191063	0.130169	0.627	0.6	2080.68
Socs6	0.0311079	0.130151	0.289	0.162	423.13
Fam133b	0.110316	0.13005	0.675	0.543	1344.09
Abhd17c	0.0149124	0.129998	0.253	0.114	208.431
Cdkn2aip	0.0219877	0.129932	0.229	0.105	303.694
Gosr1	0.0870038	0.129828	0.422	0.305	1091.98
Snrpa	0.0367507	0.129802	0.301	0.19	495.693
Bbx	0.259968	0.129631	0.398	0.333	2560.16
Plekhb1	0.429945	0.129608	0.434	0.4	2808.83
Agfg1	0.126927	0.129568	0.53	0.457	1488.21
Rchy1	0.0874531	0.129565	0.687	0.6	1097.1
Oaz1	0.00485413	0.12955	1	1	69.215
Mpv17l	0.143891	0.129453	0.506	0.4	1653.74
Isca2	0.0752464	0.129421	0.446	0.333	957.284
Ypel3	0.139966	0.129404	0.843	0.867	1616.05
Plcb4	0.725194	0.129264	0.578	0.59	2279.28
Usp20	0.102039	0.129119	0.542	0.448	1257.53
Tpr	0.0400574	0.12899	0.735	0.524	537.41
Yipf3	0.0165341	0.12891	0.289	0.152	230.485
Erlin1	0.0387702	0.128801	0.193	0.095	521.343
Rgs6	0.00446897	0.128784	0.157	0.038	63.799
Syt4	0.145704	0.128746	0.976	0.952	1672.24
Slc6a11	0.153385	0.128737	0.446	0.362	1748.59
Apex1	0.0152551	0.128737	0.289	0.143	213.113
Dcc	0.000330484	0.128476	0.145	0.01	4.80193
Rps6ka3	0.0274816	0.128415	0.193	0.086	376.058
Kcnh2	0.282118	0.128361	0.301	0.248	2517.34
Krr1	0.203532	0.128324	0.398	0.343	2190
Ikzf5	0.066546	0.128323	0.398	0.295	857.245
Fabp3	0.166392	0.128323	0.458	0.381	1872.24
Cbr1	0.00809221	0.128319	0.349	0.171	114.569
Zfp560	0.110194	0.12826	0.47	0.381	1342.83
Wdr43	0.039698	0.128114	0.41	0.286	532.946
Scp2	0.192266	0.128105	0.446	0.39	2090.31
Rpl9	0.00283344	0.128093	1	1	40.6627
Tnpo2	0.0595087	0.128016	0.518	0.371	772.959
Hsbp1	0.209274	0.127994	0.904	0.914	2234.21
Dars	0.0636588	0.127983	0.41	0.295	822.726
Trim28	0.0465776	0.127935	0.446	0.305	617.339
Polr2i	0.0597782	0.127857	0.518	0.4	776.101
Nin	0.0311347	0.127821	0.205	0.095	423.463
Eef1akmt1	0.218595	0.127794	0.241	0.181	2242.13
Akirin2	0.393978	0.127777	0.458	0.457	2763.36
Zfp266	0.324945	0.127583	0.458	0.371	2733.76
Txn2	0.160302	0.127346	0.639	0.552	1814.3
Kdm6b	0.0311873	0.127345	0.47	0.324	424.147
Thrb	0.156446	0.127344	0.193	0.124	1778.16
Trove2	0.161852	0.127326	0.675	0.571	1828.93
Eny2	0.326769	0.12726	0.639	0.648	2740.94
Pip5k1a	0.131685	0.127217	0.542	0.448	1534.79
2610044O15Rik8	0.0578504	0.126998	0.265	0.162	752.517
Mto1	0.156791	0.126951	0.265	0.19	1780.51
Zfp281	0.203339	0.126787	0.313	0.257	2188.74
Cdkl2	0.103341	0.126652	0.687	0.571	1271.41
Ank2	0.0173447	0.126553	0.964	0.981	241.3
Gm11808	0.280604	0.126535	0.554	0.552	2509.16
Grm1	0.532647	0.126394	0.289	0.257	2722.89
Hipk1	0.0437439	0.126363	0.675	0.543	583.456
Med8	0.0730335	0.126303	0.337	0.219	933.953
Trp53i11	0.0590188	0.126126	0.373	0.248	767.009
Scand1	0.250891	0.125934	0.518	0.476	2497.87
Celf2	0.201349	0.125916	0.88	0.886	2170.75
Spg7	0.0185681	0.125722	0.229	0.105	257.856
Odc1	0.21015	0.125633	0.578	0.514	2241.67
Ssr1	0.0279873	0.125511	0.952	0.914	382.503
Tra2b	0.196346	0.125507	0.831	0.79	2124.66
Atp1a2	0.0421097	0.125321	0.229	0.124	563.007
Snrnp27	0.0261816	0.125278	0.819	0.667	358.923
Bcs1l	0.0520863	0.125243	0.277	0.162	682.122
Anxa5	0.00565658	0.125237	0.157	0.038	80.5214
Hdac4	0.190209	0.125186	0.349	0.295	2073.09
Arl6ip6	0.0140628	0.125108	0.205	0.086	196.894
Tmcc1	0.0963356	0.124995	0.675	0.552	1197.16
Acp6	0.00231111	0.124924	0.133	0.019	33.2361
Selenom	0.201443	0.124917	0.843	0.81	2171.55
Irf2bp1	0.231203	0.124831	0.325	0.248	2343.47
Cox6a1	0.0492999	0.12477	0.88	0.914	651.104
Gm26917	0.102446	0.124664	0.759	0.657	1262.14
Lancl1	0.133509	0.12443	0.349	0.257	1552.84
Ttpal	0.147044	0.124426	0.337	0.276	1685.42
Otud6b	0.138015	0.124326	0.542	0.505	1598.35
Cdk17	0.0465588	0.124247	0.47	0.333	617.137
Cpne5	0.168177	0.124214	0.458	0.371	1886.78
Bhlhe41	0.216865	0.124153	0.494	0.41	2232.85
Jam3	0.148002	0.124055	0.422	0.333	1694.47
Glul	0.176908	0.123869	0.446	0.352	1960.14
Snx18	0.00925373	0.123867	0.205	0.076	130.764
Gatd1	0.0205189	0.123846	0.325	0.181	284.042
Acbd3	0.424122	0.123676	0.301	0.286	2823.8
Rdh13	0.126123	0.123545	0.289	0.21	1480.18
Esyt3	0.356033	0.123485	0.133	0.095	2892.41
Xpo1	0.0713206	0.123463	0.59	0.429	914.188
Setd1b	0.091386	0.123436	0.422	0.314	1141.96
Ahi1	0.000614316	0.123432	1	1	8.90636
Romo1	0.274766	0.123422	0.687	0.676	2477.84
Ccdc88c	0.0177408	0.123379	0.145	0.048	246.651
Anp32b	0.0825656	0.123312	0.494	0.371	1041.07
Phf20l1	0.303077	0.123284	0.675	0.6	2622.22
Xpo7	0.284369	0.123158	0.554	0.505	2524.63
Parvb	0.0693283	0.123104	0.169	0.086	890.591
Rtraf	0.0336986	0.123005	0.952	0.876	456.649
H3f3b	0.0415642	0.122704	0.988	0.981	556.337
Eef1a1	0.00759749	0.122692	1	1	107.687
Ppig	0.160301	0.122653	0.867	0.857	1814.44
Mettl3	0.173963	0.12265	0.229	0.152	1936.03
Txndc17	0.0944138	0.122477	0.735	0.657	1175.45
Fyn	0.115235	0.122455	0.506	0.467	1375.33
Mttp	0.0872423	0.122301	0.53	0.438	1094.63
Rragd	0.0675007	0.122298	0.361	0.257	868.532
Fam114a2	0.134419	0.122182	0.446	0.343	1562.09
Shisa9	0.116098	0.122173	0.639	0.543	1384.47
Cdyl	0.0491058	0.12204	0.193	0.095	648.737
Chl1	0.282608	0.122007	0.928	0.924	2517.19
Kit	0.164116	0.121961	0.193	0.124	1850.73
Mga	0.298181	0.121916	0.602	0.6	2598.64
Stx5a	0.0671262	0.121911	0.554	0.429	864.25
Emc3	0.214368	0.121846	0.434	0.381	2211.21
Ank3	0.0436204	0.121801	0.976	0.933	581.94
Zfp60	0.0727014	0.121774	0.373	0.257	930.36
Chchd5	0.0733788	0.121641	0.289	0.181	937.781
Utp11	0.103064	0.121495	0.422	0.333	1268.51
Dgkh	0.0990283	0.121433	0.41	0.333	1225.97
Luc7l3	0.0561279	0.121404	0.892	0.867	731.235
Slx4ip	0.0415369	0.121343	0.169	0.076	556.096
Zfp410	0.0952569	0.121247	0.265	0.162	1184.9
Zfp667	0.0740901	0.121198	0.349	0.238	943.686
Ccdc34	0.196582	0.121183	0.518	0.476	2126.63
Cdipt	0.0194622	0.121169	0.711	0.571	269.804
Gopc	0.207733	0.121128	0.41	0.324	2221.29
Chchd6	0.152676	0.120937	0.349	0.267	1742.34
Slain1	0.091462	0.120918	0.277	0.19	1142.82
Arhgap5	0.222684	0.120878	0.687	0.667	2275.83
Nxf1	0.328783	0.120838	0.627	0.61	2752.9
Gm34466	0.00120508	0.120549	0.096	0	17.3882
Ddx39b	0.107785	0.120515	0.651	0.543	1317.13
March8	0.0318439	0.120404	0.446	0.286	432.663
Elavl1	0.301837	0.120302	0.53	0.467	2618.44
Plod3	0.0279222	0.120295	0.241	0.124	381.669
Mrpl37	0.0338144	0.120154	0.193	0.086	458.083
Fam3a	0.00260335	0.120131	0.169	0.038	37.3997
Pdzrn3	0.0111738	0.120114	0.06	0	157.271
Lysmd4	0.0660667	0.120095	0.494	0.362	851.665
Sem1	0.0833395	0.120049	0.964	0.933	1049.74
Bud23	0.0492221	0.119974	0.337	0.21	650.174
Commd10	0.0294451	0.119948	0.205	0.095	401.748
Bloc1s2	0.029312	0.119787	0.47	0.324	400.05
Mrpl33	0.304475	0.119725	0.675	0.59	2628.84
Alkbh1	0.042769	0.119692	0.566	0.438	571.18
Srpk2	0.149243	0.119669	0.904	0.886	1707.34
Myh7	0.0175877	0.119661	0.193	0.076	244.592
B630019K06Rik	0.041641	0.119644	0.819	0.743	557.24
Mrpl14	0.139339	0.11961	0.349	0.267	1610.2
Acaca	0.214493	0.119563	0.59	0.571	2212.28
Paip2b	0.054027	0.11953	0.59	0.467	705.647
Tspan2	0.104608	0.119472	0.47	0.343	1284.37
Emc9	0.080985	0.119431	0.386	0.286	1022.92
Lipe	0.0540888	0.119387	0.253	0.143	706.345
Gm47033	0.0227428	0.119327	0.241	0.114	313.759
Cdc26	0.185613	0.119266	0.494	0.448	2033.95
Tmem47	0.148049	0.119252	0.482	0.4	1694.87
Igdcc4	0.138227	0.119107	0.386	0.295	1600.25
Cdc5l	0.224858	0.118995	0.349	0.295	2293.1
Pls3	0.132036	0.118963	0.446	0.343	1538.09
Slc38a2	0.524257	0.11892	0.675	0.638	2713.03
Ccdc88a	0.044222	0.118905	0.747	0.667	589.258
Riiad1	0.129698	0.11881	0.277	0.19	1515.39
Abhd18	0.411691	0.118793	0.494	0.505	2794.56
Zranb2	0.183161	0.118768	0.928	0.905	2011.1
Cfap20	0.128161	0.118665	0.361	0.257	1499.87
Dync1i2	0.0423717	0.118627	0.916	0.752	566.212
Lix1	0.00965791	0.118562	0.108	0.019	136.37
Orai3	0.0143385	0.118556	0.12	0.029	200.582
Cabin1	0.161715	0.118522	0.446	0.352	1827.7
Cdh12	0.121555	0.118453	0.265	0.171	1442.01
Ccdc86	0.0588904	0.118443	0.181	0.095	765.457
Rpgrip1	0.132775	0.118409	0.578	0.476	1545.63
Tshz2	0.129066	0.118407	0.819	0.781	1509.29
Sfr1	0.124385	0.118349	0.711	0.638	1462.27
Leprotl1	0.238575	0.118278	0.53	0.467	2402.21
Gnpnat1	0.0240009	0.118246	0.241	0.114	330.084
Ifnar1	0.166703	0.118221	0.289	0.21	1874.91
Rasgrf2	0.021974	0.118164	0.771	0.562	303.526
Rap1a	0.0728337	0.11815	0.422	0.343	931.689
Siva1	0.0345816	0.117947	0.349	0.21	467.819
Coq9	0.0444519	0.117933	0.337	0.219	592.1
Clk4	0.171185	0.117859	0.398	0.343	1912.31
Ino80	0.077416	0.117819	0.193	0.105	982.718
Ing4	0.171125	0.117722	0.313	0.238	1911.81
Tpst1	0.0203068	0.117721	0.373	0.229	281.148
Cir1	0.0437247	0.117665	0.482	0.343	583.244
Rab36	0.210961	0.117588	0.542	0.448	2186.61
Unc80	0.0253944	0.117558	0.952	0.905	348.614
Tle2	0.0705248	0.117389	0.265	0.171	905.045
Hdgfl3	0.0818076	0.117361	0.928	0.819	1032.33
Tmem2	0.0195842	0.117289	0.205	0.086	271.456
Ankrd26	0.0646727	0.117229	0.422	0.276	834.795
Nlk	0.0784433	0.117178	0.434	0.333	994.347
Ppm1b	0.20402	0.117154	0.578	0.514	2194.03
Narf	0.0633386	0.117111	0.277	0.171	818.969
Gpc3	0.0737746	0.117027	0.193	0.105	942.175
Cdk14	0.245943	0.117023	0.422	0.352	2459.43
Lzts2	0.139015	0.117015	0.265	0.181	1607.16
Arhgap24	0.156999	0.116997	0.229	0.152	1782.41
Dicer1	0.105909	0.116985	0.506	0.371	1297.49
Scn9a	0.0910331	0.11685	0.482	0.343	1137.91
Ubxn2a	0.212087	0.116793	0.446	0.381	2196.79
Reep6	0.0127656	0.116665	0.181	0.067	179.025
Rps27l	0.246297	0.116585	0.482	0.419	2461.74
Sbds	0.188062	0.11658	0.349	0.276	2054.77
Cpeb4	0.352237	0.116487	0.554	0.514	2874.25
Nlgn1	0.30864	0.116283	0.614	0.571	2653.07
Ddx50	0.113833	0.116126	0.892	0.79	1361.33
Ncoa5	0.0383139	0.116026	0.349	0.219	515.513
Enpp5	0.296127	0.115974	0.614	0.562	2590.22
Lclat1	0.100162	0.115873	0.289	0.21	1237.61
Dapk1	0.0739642	0.115789	0.687	0.543	942.304
Gm3448	0.0141713	0.115729	0.133	0.038	198.327
Gabrg3	0.291113	0.1157	0.627	0.581	2561.79
Zfand6	0.104395	0.115605	0.337	0.267	1282.39
Ccnt2	0.0759868	0.115562	0.807	0.762	965.717
Acvr2a	0.105728	0.115556	0.277	0.181	1296.22
Luc7l2	0.153283	0.115461	0.952	0.924	1747.88
Rgs7bp	0.295352	0.115431	0.41	0.324	2585.51
Kat14	0.0172388	0.115375	0.253	0.114	239.912
Rgs16	0.161379	0.115357	0.217	0.143	1824.72
Sbf2	0.0929269	0.115324	0.518	0.4	1159.36
Ago3	0.181188	0.11532	0.446	0.39	1995.24
Api5	0.185909	0.115313	0.446	0.352	2036.26
Ctnnd2	0.392486	0.115287	0.602	0.61	2757.21
9530068E07Rik	0.071989	0.115227	0.699	0.61	922.179
4921524J17Rik	0.158584	0.115109	0.325	0.248	1798.02
Snrpg	0.0872499	0.114954	0.711	0.562	1094.64
Xiap	0.124568	0.114882	0.663	0.629	1464.05
Sft2d1	0.236603	0.114619	0.41	0.352	2386.14
Cdc27	0.206314	0.114594	0.446	0.41	2214.37
Tsr3	0.0185681	0.114578	0.229	0.105	257.837
Washc4	0.192374	0.114553	0.313	0.229	2090.92
Arhgef28	0.207804	0.114535	0.145	0.095	2221.84
Cdo1	0.113419	0.114489	0.205	0.133	1356.94
Tmsb4x	0.00753664	0.114459	1	1	106.832
Rps23	0.00600097	0.114457	1	1	85.3158
Pop5	0.0637043	0.114393	0.663	0.514	823.251
Sarm1	0.0641905	0.114376	0.205	0.114	829.213
Ufsp2	0.0930213	0.114332	0.41	0.305	1160.44
Rora	0.107248	0.114237	0.277	0.19	1311.64
Ttc14	0.0471283	0.114212	0.904	0.829	624.261
H2-Ke6	0.242091	0.113941	0.253	0.2	2430.59
Rps8	0.00125763	0.113909	1	1	18.1426
Kin	0.0434092	0.113899	0.313	0.19	579.166
Cpne4	0.113036	0.113892	0.229	0.143	1354.06
Stxbp2	0.0157883	0.113765	0.241	0.114	220.42
Ttc9c	0.171995	0.113643	0.349	0.276	1919.99
Galntl6	0.117653	0.113596	0.349	0.238	1401.02
Nbas	0.0164327	0.113499	0.217	0.095	229.121
Dimt1	0.0345608	0.113382	0.229	0.114	467.608
Pou2f1	0.266088	0.113296	0.349	0.286	2432.84
Mrps15	0.0607499	0.113253	0.434	0.295	787.622
Pdrg1	0.192984	0.112937	0.373	0.276	2096.19
Dhx40	0.0690658	0.112918	0.301	0.19	887.496
Kmt2c	0.201825	0.112897	0.627	0.543	2175.06
Lemd3	0.0345418	0.112877	0.337	0.19	467.42
Zfp821	0.626285	0.11281	0.301	0.286	2666.09
Cln3	0.0292356	0.112792	0.229	0.114	399.065
Gnl3	0.290064	0.112593	0.458	0.41	2555.75
Ttll7	0.234279	0.112574	0.614	0.552	2368.09
Zfp141	0.0318334	0.11257	0.205	0.095	432.553
Hnrnpl	0.333777	0.112562	0.602	0.61	2780.03
Nudt3	0.113738	0.112468	0.88	0.829	1360.31
Fam163b	0.452431	0.112463	0.253	0.238	2751.23
Pck2	0.0197385	0.112461	0.301	0.152	273.516
Plppr3	0.223532	0.112407	0.566	0.486	2282.49
1700019D03Rik	0.038348	0.112285	0.193	0.095	515.935
Trhde	0.0168019	0.112282	0.096	0.019	234.05
Magohb	0.0386972	0.112221	0.193	0.086	520.439
Phf3	0.126366	0.111988	0.687	0.629	1482.9
Rpl12	0.0532871	0.111932	1	1	696.782
Mfn1	0.0779416	0.111922	0.398	0.276	988.611
Matk	0.129191	0.111849	0.795	0.762	1510.63
Ube2r2	0.139199	0.111791	0.807	0.686	1609
Abcd4	0.0981507	0.111718	0.265	0.171	1216.68
Rab5a	0.0501564	0.11171	0.904	0.752	661.262
Vgll3	0.421427	0.111524	0.084	0.057	2818.92
Acadsb	0.158162	0.111503	0.602	0.514	1793.56
Polr3d	0.0469129	0.111209	0.229	0.124	621.596
Amd1	0.067509	0.111203	0.265	0.162	868.571
Iqcb1	0.156726	0.111029	0.434	0.362	1780.09
Nrxn3	0.0287932	0.111026	1	1	393.113
Kdm2a	0.139963	0.110982	0.53	0.476	1616.16
Ndufs1	0.160081	0.110863	0.47	0.381	1812.44
Srsf2	0.223258	0.110824	0.831	0.819	2280.58
Trp53bp1	0.153149	0.110711	0.711	0.667	1746.97
Morc2a	0.0537742	0.110695	0.277	0.181	702.667
Rpl39	0.00471327	0.110613	1	1	67.2396
Cdk10	0.066123	0.110516	0.373	0.257	852.326
Mt2	0.0635435	0.110463	0.253	0.143	821.427
Rpl19	0.00364939	0.110351	1	1	52.252
Rbmxl1	0.0828123	0.110343	0.361	0.238	1043.77
Ppip5k1	0.193938	0.11034	0.53	0.448	2104.62
St7l	0.177099	0.110071	0.301	0.229	1961.01
Map4k4	0.120374	0.109853	0.422	0.314	1429.32
Uqcrc2	0.211888	0.109812	0.542	0.533	2195.37
Rtn4	0.174513	0.109792	0.964	0.914	1940.58
Zfp446	0.0136607	0.109713	0.181	0.067	191.386
Brinp1	0.408362	0.109549	0.494	0.476	2787.89
Hacd1	0.123276	0.109518	0.205	0.124	1450.84
Ucp2	0.0814354	0.109484	0.229	0.133	1028.04
Mrps14	0.0440539	0.109429	0.699	0.571	587.194
Mettl13	0.0324702	0.109379	0.217	0.105	440.783
Supt5	0.341602	0.109289	0.602	0.59	2819.24
Lsm11	0.03934	0.109228	0.277	0.152	528.651
Hsd17b12	0.0550877	0.108967	0.422	0.286	718.619
Il13ra1	0.225808	0.108817	0.241	0.181	2301.21
Bok	0.037858	0.108616	0.265	0.143	509.947
Urb1	0.0225939	0.108584	0.169	0.067	311.773
Ylpm1	0.140624	0.108516	0.699	0.657	1622.38
Plpp5	0.0441518	0.108486	0.193	0.095	588.366
Mtmr9	0.370338	0.108474	0.373	0.352	2959.37
4930453N24Rik	0.0602507	0.108463	0.253	0.143	781.873
Dek	0.116649	0.108345	0.518	0.476	1390.33
Rrnad1	0.303761	0.108293	0.446	0.41	2624.49
Dzip1l	0.0199486	0.108292	0.157	0.057	276.388
Mrpl9	0.206832	0.108244	0.301	0.229	2214.55
Gm27199	0.100708	0.108221	0.398	0.286	1243.75
Cst3	0.176263	0.108186	0.699	0.695	1954.76
Pttg1ip	0.0298601	0.108163	0.181	0.076	407.053
Crebrf	0.127256	0.108017	0.59	0.457	1491.31
Pde3b	0.0298111	0.107991	0.193	0.086	406.475
Fam131a	0.407137	0.107948	0.554	0.524	2788.89
Cacna2d1	0.0642483	0.107754	0.301	0.19	829.831
Spag9	0.10019	0.107695	0.928	0.838	1237.85
Mphosph6	0.343843	0.107668	0.253	0.21	2832.58
Cpsf6	0.0703951	0.107644	0.627	0.543	903.45
Bend5	0.0404455	0.107633	0.265	0.143	542.374
Timm9	0.436156	0.107591	0.795	0.771	2785.29
Btbd7	0.0792992	0.107565	0.337	0.229	1003.69
Sar1b	0.139033	0.107562	0.434	0.333	1607.22
Pikfyve	0.11865	0.107496	0.289	0.19	1411.22
Tars2	0.0335785	0.10747	0.241	0.124	455.122
G3bp1	0.111171	0.107442	0.759	0.619	1352.95
Med13	0.0835778	0.107436	0.349	0.238	1052.33
Sf3b1	0.146294	0.107432	0.855	0.752	1677.7
Mdm4	0.0837167	0.107395	0.518	0.419	1053.99
Iws1	0.165074	0.107202	0.301	0.229	1860.38
Man2b1	0.119561	0.107199	0.265	0.19	1420.51
Gm16536	0.0365052	0.107117	0.277	0.143	492.747
Tob1	0.147972	0.107091	0.349	0.267	1694.42
Hrk	0.139609	0.107064	0.193	0.124	1612.77
Chpt1	0.342189	0.107011	0.434	0.381	2821.69
Nr1d1	0.0363432	0.106961	0.157	0.067	490.67
Fam107b	0.00454038	0.106907	0.12	0.019	64.8003
Ssh3	0.162601	0.106877	0.217	0.143	1836.91
Mrps21	0.127954	0.106856	0.627	0.59	1497.83
Pcdh7	0.134121	0.10682	0.976	0.962	1559.42
Slc20a1	0.265889	0.106658	0.398	0.324	2432.88
Gpatch4	0.143017	0.106608	0.47	0.39	1645.27
Tmem64	0.231755	0.106582	0.542	0.438	2347.67
Acat1	0.281135	0.106548	0.518	0.438	2513.06
Cactin	0.104753	0.106523	0.217	0.133	1285.94
Cnnm3	0.142887	0.106511	0.325	0.229	1644.92
Alyref2	0.0179463	0.106472	0.133	0.038	249.382
Dgkz	0.373346	0.106461	0.301	0.257	2969.97
Ahcyl1	0.346724	0.106347	0.627	0.629	2845.91
Ndufa11	0.213332	0.106316	0.663	0.6	2207.13
Ndufb2	0.23479	0.106141	0.855	0.762	2371.62
N6amt1	0.0780758	0.106088	0.373	0.248	990.079
Sept1	0.0537832	0.106031	0.241	0.133	702.731
Upf3b	0.204555	0.105855	0.554	0.495	2199.18
Rapgef3	0.0324563	0.105836	0.181	0.076	440.626
Pdk1	0.0795899	0.105799	0.398	0.276	1007.13
Aimp1	0.113974	0.105719	0.747	0.619	1362.67
Ahcyl2	0.058435	0.105716	0.663	0.495	759.831
Fbxo18	0.182163	0.105703	0.313	0.238	2003.25
Erlin2	0.0632298	0.1057	0.422	0.314	817.687
P2ry14	0.0158357	0.105654	0.133	0.038	221.051
AI593442	0.544217	0.105649	0.506	0.533	2722.72
Traip	0.0355827	0.105607	0.145	0.057	480.936
Pogz	0.0981384	0.105556	0.494	0.41	1216.62
Armt1	0.145826	0.105487	0.289	0.21	1673.35
Nfatc2	0.0380645	0.105392	0.217	0.105	512.348
Nme7	0.0246188	0.105113	0.157	0.057	338.312
Csnk1a1	0.0477607	0.105033	0.904	0.895	632.208
Atxn10	0.230509	0.10495	0.699	0.695	2338.06
Zfp207	0.0980317	0.104935	0.675	0.571	1215.4
Tram1l1	0.252523	0.104876	0.566	0.486	2508.56
Ctbp2	0.0857983	0.104856	0.229	0.133	1078.48
As3mt	0.0304103	0.104779	0.301	0.171	414.158
D8Ertd738e	0.110988	0.104733	0.928	0.848	1351.16
Snhg12	0.0891657	0.104701	0.807	0.695	1116.09
Hspa13	0.503275	0.104687	0.627	0.629	2717.69
Samd4b	0.158954	0.104597	0.542	0.429	1801.59
Rif1	0.0754094	0.104589	0.506	0.362	958.905
Wdr45	0.0425967	0.104565	0.145	0.057	568.922
Stxbp6	0.594289	0.104543	0.096	0.076	2715.9
Rev3l	0.384323	0.104481	0.47	0.41	2727.92
Psmb2	0.169575	0.104375	0.337	0.257	1898.73
Syncrip	0.176935	0.104303	0.566	0.457	1960.26
Abhd8	0.138004	0.104252	0.771	0.762	1598.36
Cpne2	0.503577	0.104242	0.566	0.543	2718.31
Gria2	0.121957	0.10418	1	0.99	1446.29
Orc6	0.15331	0.104135	0.373	0.286	1748.05
Gprasp2	0.0991084	0.104042	0.988	0.962	1226.86
Fam69a	0.100502	0.103983	0.349	0.238	1241.39
Eaf1	0.292803	0.103919	0.157	0.114	2571.4
Vps29	0.179321	0.103905	0.663	0.6	1979.71
Rprd1b	0.134645	0.103898	0.398	0.314	1564.31
Rbm24	0.200704	0.103784	0.169	0.114	2165.59
Nos1	0.276409	0.103722	0.627	0.543	2488.51
Ttc26	0.0674859	0.103707	0.133	0.057	868.543
Tmie	0.2126	0.103678	0.639	0.543	2200.84
Syt16	0.161207	0.103615	0.41	0.324	1823.73
Mrfap1	0.00915999	0.103611	1	1	129.449
Efs	0.00876681	0.103598	0.133	0.029	123.98
Cap2	0.485516	0.103589	0.47	0.495	2721.32
Ddhd1	0.147366	0.10357	0.59	0.467	1688.81
Vps8	0.0382675	0.103538	0.169	0.076	514.927
Ube2e1	0.242195	0.103523	0.831	0.771	2431.4
Bri3	0.205017	0.103501	0.928	0.819	2203.73
Sike1	0.209128	0.103501	0.386	0.295	2232.86
Lyrm4	0.0840975	0.103449	0.325	0.21	1058.45
Tm2d2	0.156041	0.103403	0.506	0.4	1773.71
Borcs7	0.165551	0.103316	0.699	0.629	1864.94
Ube2e3	0.0851669	0.103312	0.506	0.371	1071.06
Strbp	0.232898	0.103213	0.783	0.724	2356.23
Zranb1	0.19055	0.103046	0.566	0.533	2075.86
Srrm1	0.168109	0.103025	0.855	0.819	1886.19
Zkscan2	0.0619035	0.103023	0.277	0.162	801.836
Dcaf4	0.0363147	0.102997	0.205	0.095	490.321
Rpe	0.114954	0.102993	0.289	0.2	1372.55
Prpf38b	0.158091	0.102981	0.518	0.429	1793.06
Homez	0.0210731	0.102924	0.157	0.057	291.42
Zdhhc7	0.0549124	0.102901	0.313	0.19	716.607
Taf15	0.148545	0.102892	0.506	0.429	1700.1
Snx25	0.118371	0.102873	0.325	0.229	1408.14
Def8	0.10967	0.102836	0.277	0.19	1336.98
Nr2c2ap	0.181158	0.102794	0.458	0.371	1995.1
Ccdc107	0.0678867	0.102792	0.265	0.152	873.09
Tsc22d2	0.0705417	0.102679	0.373	0.248	905.121
Mis12	0.108952	0.102656	0.301	0.2	1329.33
Lrrn3	0.175886	0.10264	0.542	0.457	1951.28
Tnip2	0.0164047	0.10263	0.193	0.076	228.747
Dnajb1	0.341908	0.102624	0.458	0.419	2820.74
Polr1d	0.238951	0.102584	0.831	0.81	2404.56
Cst6	0.0428692	0.102464	0.157	0.067	572.432
Itch	0.205757	0.102354	0.494	0.4	2210.03
C230004F18Rik	0.205245	0.102354	0.795	0.752	2205.77
Bcl9l	0.13479	0.10232	0.253	0.181	1565.86
Prdx2	0.386799	0.102228	0.627	0.61	2738.92
Prpf40b	0.150527	0.102169	0.373	0.286	1720.68
Nsun2	0.157718	0.102093	0.422	0.343	1789.31
9930021J03Rik	0.241468	0.102059	0.518	0.476	2425.79
Tnks2	0.238951	0.101953	0.566	0.495	2404.33
Npr2	0.227334	0.101917	0.361	0.295	2314.26
Ptpro	0.258562	0.101904	0.771	0.743	2550.2
Zfp451	0.172682	0.101828	0.699	0.571	1924.37
Snrpb	0.141528	0.101805	0.373	0.286	1630.83
AI597479	0.0993508	0.101801	0.41	0.305	1229.66
Plgrkt	0.137111	0.101775	0.289	0.21	1588.84
Zfp638	0.0799526	0.101761	0.651	0.6	1011.08
Slc4a8	0.0725172	0.101696	0.494	0.362	928.148
Hspa9	0.45713	0.101691	0.639	0.676	2753.29
Slc12a2	0.192037	0.101683	0.289	0.219	2088.41
Decr2	0.1228	0.101654	0.313	0.229	1454.93
Cpsf3	0.0618275	0.101482	0.229	0.124	800.975
Angptl6	0.0416531	0.101463	0.301	0.181	557.36
Caml	0.158798	0.101456	0.301	0.219	1800.14
Dmd	0.258185	0.101305	0.361	0.314	2549.83
Iqce	0.123365	0.101296	0.337	0.238	1451.39
Nop10	0.0531984	0.101274	0.843	0.819	695.676
Ralgapa1	0.284585	0.101225	0.566	0.524	2524.84
P4hb	0.0810399	0.101218	0.614	0.533	1023.45
Rnf25	0.114029	0.101182	0.265	0.181	1363.22
S100a10	0.0172759	0.101083	0.241	0.105	240.394
Grm7	0.260125	0.101031	0.494	0.438	2560.93
Pik3r1	0.22821	0.100992	0.434	0.371	2321.12
Ttc21b	0.21329	0.10092	0.313	0.229	2206.91
Plxdc2	0.244801	0.1009	0.265	0.2	2451.93
L1cam	0.230542	0.100862	0.819	0.829	2337.92
R3hcc1	0.0680046	0.100833	0.181	0.095	874.471
Cdc14a	0.0465196	0.100807	0.096	0.029	616.71
Ddx23	0.137144	0.100793	0.169	0.105	1589.09
Apip	0.0211175	0.100786	0.145	0.048	291.992
Banp	0.220171	0.10074	0.337	0.276	2256.31
Tmem163	0.223944	0.100702	0.145	0.095	2286.02
Gpr27	0.127185	0.100698	0.458	0.352	1490.74
Eif2ak3	0.0287916	0.100596	0.205	0.095	393.121
Ehbp1l1	0.121556	0.100554	0.386	0.295	1441.89
Pak6	0.397196	0.100454	0.41	0.381	2766.47
Nebl	0.22946	0.100452	0.506	0.457	2330.17
Tmem209	0.0748293	0.10045	0.253	0.162	952.652
Bnip3l	0.381403	0.100429	0.602	0.571	2719.4
Ptk2	0.316245	0.100379	0.361	0.314	2692.83
Scyl1	0.187973	0.100211	0.277	0.21	2053.98
Kbtbd7	0.315032	0.100204	0.458	0.39	2686.91
9330159F19Rik	0.218229	0.10019	0.735	0.61	2242.96
Chchd3	0.290057	0.100168	0.301	0.257	2555.98
Cuta	0.192114	0.100156	0.41	0.352	2089.04
Tpbg	0.0297571	0.100092	0.12	0.038	405.768
Zfp738	0.280173	0.100009	0.361	0.305	2506.15
Plekhg1	0.0696989	0.09995	0.145	0.067	895.003
Ip6k2	0.153369	0.0999459	0.554	0.476	1748.56
Arid3a	0.0220445	0.0999268	0.145	0.048	304.457
Ncoa7	0.0999115	0.0999123	0.904	0.857	1235.01
Snrnp25	0.0828785	0.0998594	0.337	0.229	1044.52
Haus8	0.0708417	0.0997584	0.277	0.181	908.757
Cebpzos	0.456668	0.0997468	0.422	0.381	2753.71
Chchd2	0.0463746	0.099731	1	1	615.066
Iah1	0.0302566	0.0996278	0.169	0.067	412.216
4732440D04Rik	0.0196871	0.0995816	0.133	0.038	272.824
Uba6	0.023878	0.0995573	0.434	0.286	328.418
Xpr1	0.0969377	0.0995316	0.807	0.771	1204.26
Rpl34	0.112491	0.0995178	1	1	1348.31
Arfrp1	0.354254	0.099493	0.398	0.362	2881.51
Snx6	0.132218	0.0993906	0.349	0.257	1539.81
Tcf20	0.440721	0.0993827	0.651	0.59	2762.88
Arpc3	0.155798	0.0993799	0.542	0.476	1771.57
Twistnb	0.202094	0.0992496	0.398	0.305	2177.36
Zik1	0.295439	0.0991502	0.205	0.152	2585.98
Paf1	0.207339	0.09914	0.217	0.152	2218.73
Oscp1	0.304119	0.0991084	0.361	0.324	2626.98
Mindy2	0.164713	0.099033	0.578	0.514	1856.64
Scnm1	0.321616	0.0990229	0.289	0.248	2717.01
Tm9sf2	0.152829	0.0990106	0.807	0.705	1743.78
Tcf3	0.0539555	0.0990083	0.193	0.095	704.874
Wdr12	0.269844	0.098945	0.386	0.324	2452.88
Wdr73	0.0473715	0.0988704	0.229	0.124	627.247
Pcdh15	0.173333	0.0988298	0.41	0.314	1930.07
Klf2	0.00290619	0.0987217	0.108	0.01	41.7009
Ankrd27	0.0405292	0.0986881	0.181	0.086	543.416
Nxpe3	0.279438	0.0986287	0.241	0.2	2502.93
Mrpl51	0.61663	0.0986066	0.506	0.495	2676.79
Gpr88	0.0241287	0.0985911	0.108	0.029	331.793
Cox19	0.083124	0.0985889	0.422	0.333	1047.28
Rnf165	0.27297	0.0985603	0.566	0.495	2473.38
Mex3b	0.0259426	0.0985367	0.229	0.105	355.724
Fam120a	0.0305751	0.0984859	0.446	0.324	416.31
Ccpg1	0.200708	0.0984767	0.337	0.257	2165.44
Fam173a	0.134812	0.0984527	0.723	0.629	1565.98
Ppwd1	0.0605684	0.0984219	0.313	0.19	785.511
Pnrc2	0.349806	0.0984017	0.337	0.295	2863.16
Uba5	0.260051	0.0983257	0.53	0.457	2560.73
Zfp449	0.047874	0.0983182	0.181	0.086	633.613
Ttc5	0.21197	0.0982513	0.229	0.171	2196.01
Qtrt2	0.00304054	0.0982365	0.108	0.01	43.6135
Lipt1	0.016862	0.0982357	0.133	0.038	234.871
Wdr34	0.220931	0.098191	0.313	0.248	2262.11
Farsa	0.0529469	0.0981426	0.349	0.229	692.545
Add1	0.200253	0.0981209	0.867	0.771	2161.13
Fam229b	0.0551216	0.098118	0.373	0.248	719.006
Bcam	0.0374783	0.0980911	0.145	0.057	505.095
Slc35g2	0.0342636	0.0980494	0.241	0.124	463.861
0610010K14Rik	0.0681765	0.0979234	0.229	0.133	876.545
Sik2	0.153461	0.097903	0.157	0.095	1749.31
A230057D06Rik	0.34357	0.0978755	0.663	0.619	2831.02
Gm6710	0.0967553	0.0978365	0.241	0.152	1202.09
Lnpk	0.170145	0.0978149	0.578	0.486	1904.09
Zfp160	0.149137	0.0977955	0.241	0.162	1706.43
Tmem138	0.116442	0.0977822	0.253	0.162	1387.99
Tpd52l2	0.179161	0.0977779	0.337	0.248	1978.47
Macrod2	0.358836	0.0977496	0.578	0.543	2906.21
Chd9	0.0764713	0.0976671	0.578	0.467	971.568
Irf2bp2	0.119141	0.0976192	0.301	0.21	1415.87
Lin7c	0.0815229	0.0976149	0.627	0.533	1028.98
Pip5k1b	0.207811	0.0976033	0.193	0.133	2221.71
Rap2c	0.22345	0.0974897	0.277	0.21	2282.1
Sypl	0.091181	0.0974486	0.325	0.229	1139.49
Mpc1	0.152317	0.0974236	0.614	0.581	1738.55
Tom1l2	0.286683	0.0973377	0.651	0.581	2538.3
Ccdc93	0.181113	0.0972941	0.217	0.152	1994.78
Nabp2	0.0940572	0.0972376	0.518	0.371	1171.67
Sybu	0.409507	0.0971714	0.711	0.695	2791.61
Setd7	0.411146	0.0971633	0.446	0.419	2792.91
Zfp37	0.0775756	0.0970935	0.325	0.2	984.28
Maf1	0.117787	0.0970868	0.301	0.219	1402.02
Gid8	0.105713	0.0970393	0.325	0.219	1296.25
D3Ertd751e	0.45302	0.0970243	0.373	0.333	2751.64
Slc25a17	0.190551	0.0970036	0.349	0.286	2075.67
Dip2b	0.25853	0.0969949	0.422	0.371	2550.14
Acadvl	0.0408271	0.0969378	0.265	0.143	547.001
Mctp1	0.0225561	0.0969184	0.157	0.057	311.297
Vps54	0.11755	0.0968602	0.181	0.105	1400.25
St3gal1	0.0597383	0.0968378	0.205	0.105	775.702
Elp2	0.107523	0.0967497	0.482	0.343	1314.9
Ccdc173	0.0055329	0.0967228	0.12	0.019	78.7941
Acacb	0.0218053	0.0964949	0.205	0.086	301.305
Cited2	0.438561	0.096456	0.265	0.229	2780.92
Commd9	0.146038	0.0964539	0.289	0.2	1675.05
Katna1	0.0171689	0.0963618	0.169	0.057	238.957
Csmd2	0.0893547	0.0962223	0.434	0.295	1118.18
Zfp941	0.305818	0.0962073	0.506	0.457	2636.46
Enpp2	0.183759	0.0961797	0.12	0.067	2016.75
Acsl6	0.239264	0.0961655	0.47	0.41	2407
Eefsec	0.0922721	0.0961594	0.265	0.162	1152.02
1110004F10Rik	0.301235	0.0960968	0.892	0.838	2615.92
Borcs6	0.0699119	0.0960495	0.289	0.181	897.459
Unc5c	0.325566	0.0959817	0.398	0.352	2736.71
Gtf3c6	0.182451	0.09593	0.241	0.171	2005.14
Cdc23	0.154123	0.0958912	0.386	0.314	1755.15
Nufip1	0.140257	0.0958764	0.157	0.095	1618.71
Actl6a	0.0858772	0.0958613	0.386	0.286	1079.22
Kdm6a	0.148393	0.0957835	0.217	0.143	1698.66
Kif9	0.021831	0.0957445	0.108	0.029	301.639
Ntrk3	0.322343	0.0957273	0.687	0.629	2720.57
Cacybp	0.129382	0.0957129	0.687	0.61	1512.35
Fgfr1op2	0.407574	0.0956588	0.699	0.638	2789.03
Trbc2	0.279823	0.0956511	0.145	0.095	2504.7
Cdk2ap2	0.0891509	0.0956214	0.277	0.171	1115.99
Micu3	0.556988	0.0955763	0.928	0.886	2733.7
Lsm7	0.0342177	0.0955029	0.783	0.629	463.307
Csde1	0.227593	0.0954954	0.976	0.933	2315.76
H2-T22	0.0920011	0.0954846	0.096	0.038	1148.82
Zc3h7a	0.106959	0.0954784	0.349	0.248	1308.43
Strn	0.16544	0.095478	0.349	0.248	1864.02
Gm48855	0.0331285	0.0954148	0.133	0.048	449.288
Trp53bp2	0.0335912	0.0953338	0.133	0.048	455.261
3222401L13Rik	0.06209	0.0952571	0.108	0.038	804.19
Stambpl1	0.0555581	0.0949197	0.145	0.067	724.366
Zfp280d	0.180986	0.0948993	0.53	0.429	1993.93
Zfp664	0.45947	0.0948577	0.53	0.495	2753.15
Rtn1	0.0225616	0.0948527	1	1	311.35
Eif2b4	0.0451073	0.0948303	0.193	0.095	599.161
Zcchc10	0.365082	0.0947908	0.253	0.219	2938.91
Trmt10a	0.0254354	0.0947285	0.289	0.152	349.1
Chchd1	0.198174	0.0946938	0.614	0.543	2141.47
Mlec	0.481568	0.0946512	0.651	0.629	2726.64
Pdap1	0.176374	0.0946334	0.916	0.857	1955.46
Ring1	0.432425	0.0945806	0.458	0.419	2798.65
Phf13	0.231348	0.0944639	0.205	0.152	2344.25
Bend4	0.258975	0.0944192	0.12	0.076	2553.49
Far1	0.253973	0.0943546	0.602	0.6	2520.69
Slc2a13	0.128918	0.0943408	0.542	0.457	1507.95
Ppih	0.00893883	0.0943394	0.108	0.019	126.377
Sirt1	0.0420986	0.0943167	0.157	0.067	562.9
Tyms	0.0365943	0.0942328	0.193	0.086	493.804
Plagl1	0.0781615	0.0940953	0.193	0.105	991.088
Commd6	0.146231	0.094094	0.398	0.324	1677.13
Zcchc7	0.452719	0.0940582	0.578	0.533	2751.62
Sorbs2	0.168402	0.0940478	0.614	0.552	1889.13
Pnrc1	0.169267	0.0939898	0.361	0.276	1896.81
Trim44	0.141852	0.0939674	0.867	0.81	1634.42
Rnmt	0.167607	0.093953	0.542	0.448	1882.56
Swt1	0.0827434	0.0939412	0.313	0.21	1043.06
Adamts10	0.0981856	0.0937771	0.157	0.086	1217.01
Sltm	0.288803	0.0937541	0.675	0.619	2548.4
Dag1	0.192853	0.0937417	0.41	0.324	2095.35
Ppp2r3d	0.0600318	0.0937364	0.301	0.181	779.153
2810402E24Rik	0.104553	0.0937171	0.133	0.067	1284.01
Apopt1	0.225398	0.0937124	0.386	0.286	2297.48
Mfsd14b	0.172873	0.0936668	0.361	0.295	1925.81
Rgs20	0.127719	0.0936629	0.157	0.086	1495.59
Fam222b	0.420177	0.0935748	0.301	0.267	2816.45
Med22	0.0480342	0.093438	0.157	0.067	635.685
Ccdc174	0.4185	0.0934372	0.59	0.552	2813.15
Mut	0.107655	0.0934256	0.229	0.143	1315.65
Znrf3	0.039613	0.093384	0.157	0.067	532.002
Dusp10	0.0145847	0.0933812	0.12	0.029	203.952
Rae1	0.17783	0.0933663	0.265	0.19	1967.87
2610001J05Rik	0.170276	0.0933536	0.277	0.2	1904.2
E130307A14Rik	0.193539	0.0933302	0.434	0.352	2100.86
Smarcb1	0.153564	0.0932983	0.265	0.19	1750.17
Ubap2	0.153132	0.0932972	0.325	0.248	1746.93
Zfp112	0.259199	0.0932918	0.349	0.276	2555.19
Srsf4	0.048577	0.093279	0.398	0.286	642.285
Zfp30	0.401693	0.0932502	0.482	0.429	2774.49
Sgf29	0.0389558	0.0931637	0.145	0.057	523.683
Soga1	0.115002	0.0930559	0.145	0.076	1372.89
Crlf3	0.0205587	0.0930451	0.193	0.076	284.554
Sf3b5	0.392583	0.0930195	0.289	0.257	2757.11
AU041133	0.230686	0.0929126	0.169	0.114	2339.16
Tmem229b	0.0509665	0.092875	0.205	0.095	668.221
Gm44623	0.0111106	0.092839	0.084	0.01	156.393
Zcchc14	0.106248	0.0928287	0.41	0.314	1301
Arhgef3	0.188982	0.0927763	0.157	0.095	2062.36
Gab2	0.0729588	0.0926986	0.217	0.114	933.07
Fkbp3	0.213897	0.0926208	0.747	0.686	2211.69
Bhlhb9	0.120612	0.0926183	0.446	0.324	1431.79
Spint2	0.450585	0.0926015	0.446	0.438	2753.08
Hmx3	0.0500117	0.0925239	0.181	0.086	659.754
Etfbkmt	0.0223613	0.0925078	0.145	0.048	308.653
Rnf146	0.684118	0.092374	0.47	0.495	2565.44
Suz12	0.049233	0.0923124	0.494	0.333	650.269
Pik3c2a	0.238264	0.0922375	0.241	0.171	2399.56
Bivm	0.0945036	0.0922172	0.265	0.162	1176.29
Tmed10	0.0959716	0.0921684	0.892	0.8	1192.83
Tyw5	0.0745655	0.0921604	0.229	0.133	949.367
Fam96a	0.217396	0.0921455	0.361	0.314	2236.57
Ddit4	0.100029	0.0921166	0.229	0.133	1236.16
Rab34	0.444086	0.0921141	0.289	0.257	2755.11
Arpc1a	0.452149	0.0920865	0.771	0.743	2751.78
Ginm1	0.181642	0.0920573	0.205	0.143	1998.97
Med4	0.188844	0.0920303	0.241	0.171	2061.8
Rab23	0.252233	0.0920222	0.277	0.219	2506.69
Hmgb1	0.091833	0.0920103	0.892	0.867	1147.09
Riox2	0.0202993	0.0919952	0.133	0.038	281.065
Fam76b	0.0876707	0.0919726	0.229	0.133	1099.48
Tcerg1l	0.25466	0.0919089	0.373	0.286	2524.7
Sgk1	0.00947346	0.0919078	0.108	0.019	133.813
Gm14703	0.0638282	0.0919021	0.108	0.038	824.724
Tiam1	0.33344	0.0918993	0.313	0.276	2778.89
Jrkl	0.168882	0.0918672	0.229	0.162	1893.51
Ccnb1ip1	0.322626	0.091865	0.53	0.438	2721.99
Prrg1	0.00252857	0.091759	0.084	0	36.3431
Lysmd2	0.183449	0.0917241	0.542	0.467	2013.72
Bag1	0.189991	0.0915533	0.964	0.914	2071.1
Ddit3	0.170447	0.0915147	0.349	0.276	1905.6
Gtpbp8	0.0696446	0.0914733	0.265	0.152	894.446
Commd7	0.228597	0.0914418	0.398	0.324	2324.14
Shd	0.144328	0.0914349	0.458	0.371	1658.19
Smarcad1	0.0667035	0.0914244	0.361	0.238	859.14
Ethe1	0.0801385	0.0913878	0.169	0.086	1013.03
Cars2	0.044719	0.0913768	0.277	0.152	595.299
Nabp1	0.0793422	0.0913396	0.145	0.067	1004.15
Hdgfl2	0.187364	0.0912971	0.434	0.314	2048.83
4632415L05Rik	0.364359	0.091225	0.241	0.19	2935.64
Vps18	0.0635435	0.0911409	0.253	0.143	821.363
Cxxc4	0.150343	0.0911203	0.735	0.657	1718.73
Scn3a	0.207241	0.091033	0.819	0.762	2218.1
Znrf1	0.182049	0.0910318	0.578	0.476	2002.17
Omg	0.129722	0.0910028	0.446	0.371	1515.54
Adck5	0.0819993	0.0909108	0.205	0.114	1034.42
Mdga2	0.231947	0.0907535	0.518	0.514	2348.93
Esd	0.43054	0.0905894	0.566	0.638	2810.56
Slc25a20	0.0674859	0.0905232	0.133	0.057	868.476
Ndrg1	0.182262	0.090518	0.373	0.286	2003.79
Gm3739	0.0660281	0.0904677	0.12	0.048	851.301
Sucla2	0.207686	0.0904417	0.651	0.59	2220.99
Zfp511	0.164689	0.0902616	0.157	0.095	1856.54
B130006D01Rik	0.0986875	0.0902208	0.205	0.124	1222.05
Fbf1	0.110505	0.0901794	0.265	0.162	1345.73
Snd1	0.210266	0.0901193	0.398	0.324	2187.39
Tnrc6b	0.283169	0.0900411	0.783	0.724	2520.21
Celf4	0.0713838	0.0899807	1	1	914.855
Mrps26	0.15319	0.0899143	0.843	0.762	1747.13
Coa6	0.23541	0.0898641	0.386	0.314	2376.23
Pygo1	0.306794	0.0897216	0.41	0.343	2642.11
Eml1	0.163134	0.0896962	0.181	0.124	1842.27
Zfhx2	0.188609	0.0896791	0.554	0.438	2059.8
Cstf2t	0.242709	0.0896573	0.518	0.457	2434.37
Mcfd2	0.217956	0.0896322	0.651	0.61	2241.46
Mrpl35	0.170558	0.0895088	0.337	0.276	1906.66
Zhx1	0.175841	0.089499	0.386	0.305	1950.96
Tmed2	0.206352	0.0894712	0.795	0.714	2214.57
Mafb	0.18995	0.0894282	0.133	0.076	2070.84
Metap1d	0.28309	0.0894186	0.313	0.248	2520.07
Sft2d3	0.396625	0.0893006	0.217	0.181	2769.24
Mrps12	0.540546	0.0892359	0.675	0.638	2721.65
Cxxc5	0.208436	0.0892341	0.229	0.162	2226.31
Elof1	0.0670821	0.0892135	0.807	0.676	863.749
Hsf1	0.274816	0.089206	0.253	0.2	2476.92
AC124561.1	0.0100364	0.0891942	0.108	0.019	141.584
Ube2g1	0.224988	0.089102	0.301	0.229	2294.21
Trpc1	0.434284	0.089043	0.325	0.295	2781.15
Csmd3	0.273248	0.0889619	0.542	0.505	2473.44
Scg3	0.396747	0.0889326	0.53	0.495	2765.72
Zfp729b	0.0587312	0.0888955	0.108	0.038	763.564
Wdr77	0.528236	0.0888041	0.422	0.39	2719.89
Cox11	0.167948	0.0887688	0.337	0.248	1885.04
Arl13b	0.0355827	0.0887635	0.145	0.057	480.901
Satb1	0.151915	0.0887349	0.241	0.152	1734.41
4930430F08Rik	0.105728	0.0887129	0.277	0.181	1296.12
1700048O20Rik	0.167887	0.0887073	0.169	0.105	1885.54
Ak6	0.0721899	0.0886989	0.313	0.19	924.32
1110004E09Rik	0.143773	0.0886208	0.205	0.133	1652.81
Tfpt	0.161916	0.0885718	0.241	0.171	1829.48
Baz1b	0.174217	0.088567	0.627	0.571	1938.17
Fam204a	0.213125	0.0885616	0.506	0.429	2205.42
Ube2q2	0.786415	0.0885461	0.434	0.457	1958.96
Taf3	0.153828	0.0885436	0.337	0.248	1752.1
Ildr2	0.119129	0.0885365	0.554	0.476	1415.97
Dll1	0.0249398	0.0884627	0.108	0.029	342.524
E130308A19Rik	0.135021	0.0884413	0.205	0.124	1567.86
Tubgcp4	0.081247	0.0883989	0.205	0.114	1025.99
Ubxn6	0.222766	0.0882668	0.277	0.21	2276.44
Traf7	0.0857983	0.088159	0.229	0.133	1078.4
Ncbp3	0.11749	0.0879595	0.277	0.171	1399.78
Dnaja1	0.192267	0.0878931	0.94	0.924	2090.14
Rassf8	0.607345	0.087874	0.542	0.514	2694.18
Synrg	0.0789401	0.087856	0.711	0.59	999.855
Creld2	0.05068	0.0878433	0.193	0.095	667.912
Mrps18c	0.278197	0.0878291	0.422	0.343	2495.71
Rexo1	0.636722	0.0877797	0.277	0.267	2665.32
Amph	0.254085	0.0876997	0.639	0.61	2521.28
mt-Nd5	0.144967	0.0876865	1	0.971	1665.24
Pdia3	0.221737	0.0876399	0.627	0.571	2267.93
E430024P14Rik	0.0406715	0.0876101	0.133	0.048	545.161
Casp8ap2	0.338483	0.0876086	0.217	0.171	2803.32
Galnt7	0.465369	0.0875855	0.169	0.143	2752.66
Kcna2	0.539726	0.0875015	0.53	0.486	2719.14
Eif6	0.135414	0.087483	0.253	0.171	1572.03
Zcchc17	0.254253	0.0874759	0.892	0.867	2521.68
Mdp1	0.175244	0.0874574	0.386	0.295	1945.21
1600002K03Rik	0.0127159	0.0874178	0.12	0.029	178.354
Bcl7b	0.169374	0.0874049	0.518	0.419	1897.84
Clk1	0.115656	0.0873811	0.651	0.543	1380.13
Pcnx2	0.184989	0.0872755	0.241	0.171	2028.21
Mak16	0.102546	0.0871378	0.337	0.238	1263.26
Sec61g	0.663661	0.0870631	0.855	0.914	2610.84
Kdm5c	0.195788	0.0869918	0.361	0.286	2119.6
Hcn3	0.245237	0.0869576	0.398	0.314	2454.82
Clpb	0.185702	0.0868118	0.265	0.19	2034.55
Dolk	0.0603205	0.086798	0.12	0.048	782.718
Acad8	0.107606	0.0867668	0.12	0.057	1315.38
Fnip1	0.23025	0.0866148	0.325	0.257	2336.12
Mib2	0.413461	0.0865619	0.349	0.305	2799.96
Gpaa1	0.0440145	0.0865423	0.169	0.076	586.801
Pnp2	0.0118679	0.0865311	0.084	0.01	166.78
Pcnt	0.256834	0.0864905	0.145	0.095	2540.09
Tmbim1	0.047697	0.0864083	0.145	0.057	631.461
Phip	0.671178	0.0863048	0.627	0.676	2600.81
Gm16152	0.0374955	0.0863043	0.133	0.048	505.29
Kdm1a	0.223531	0.0862541	0.446	0.343	2282.7
Amigo2	0.194787	0.0861122	0.41	0.333	2110.91
Mrpl54	0.243884	0.0859566	0.518	0.448	2443.96
Akip1	0.00635686	0.0859477	0.096	0.01	90.3183
Usp24	0.210684	0.0858784	0.325	0.248	2183.95
Chadl	0.321868	0.0858767	0.253	0.21	2718.49
Slf1	0.201243	0.0858294	0.422	0.343	2169.8
Mbtps1	0.17821	0.0858191	0.446	0.343	1970.64
Mllt10	0.0511056	0.0857307	0.566	0.448	669.943
E130311K13Rik	0.100469	0.0856551	0.108	0.048	1241.1
Hipk2	0.4628	0.0856458	0.289	0.248	2748.57
Asic2	0.328631	0.085642	0.614	0.514	2752.29
Zfp276	0.0237318	0.0856225	0.108	0.029	326.502
Plppr5	0.0979799	0.0856176	0.325	0.229	1214.95
Sidt2	0.129439	0.0856087	0.229	0.143	1512.88
Ppp2r1b	0.0555246	0.0855233	0.108	0.038	724.041
Phactr1	0.234153	0.0855144	0.687	0.638	2367.28
BC051226	0.118944	0.0854881	0.217	0.143	1414.13
Clasp1	0.337678	0.0854539	0.59	0.524	2798.33
Tmem29	0.51812	0.0853853	0.554	0.552	2713.91
Asap2	0.317556	0.0851764	0.253	0.2	2698.91
Cntn6	0.243808	0.085135	0.241	0.181	2443.68
Dock9	0.358756	0.0851002	0.373	0.324	2906.64
Hdhd2	0.415965	0.0850919	0.482	0.467	2806.1
Dock11	0.250206	0.0850874	0.157	0.105	2491.55
Tmem242	0.143788	0.0850826	0.651	0.581	1652.84
Fam174a	0.226099	0.0849715	0.735	0.676	2303.94
Slc27a1	0.100599	0.0848824	0.193	0.105	1242.49
Smox	0.0708531	0.0848784	0.157	0.076	908.832
Osbpl5	0.115122	0.0848636	0.12	0.057	1374.1
Cops7a	0.396986	0.0848121	0.602	0.543	2765.8
Kif3a	0.349492	0.0848099	0.843	0.79	2860.94
Hivep1	0.15957	0.0846895	0.325	0.229	1806.97
Carf	0.204443	0.0846792	0.337	0.248	2198.17
4932422M17Rik	0.0102306	0.0846052	0.108	0.019	144.272
Gna13	0.322981	0.0846021	0.265	0.219	2724.34
Ptn	0.0208739	0.0845916	0.458	0.276	288.79
Snrnp48	0.377699	0.084573	0.651	0.657	2992.89
Galk1	0.00984555	0.0844843	0.108	0.019	138.97
Rbl2	0.21903	0.0844445	0.265	0.2	2246.37
Exosc8	0.090846	0.084413	0.313	0.21	1135.85
Parg	0.305086	0.0843889	0.301	0.248	2631.98
Aup1	0.223899	0.0843348	0.386	0.305	2285.78
Cep41	0.131388	0.0842908	0.157	0.086	1531.85
Klf16	0.074897	0.08426	0.229	0.133	953.439
Eif1b	0.250194	0.0842576	0.976	0.943	2491.68
Fndc4	0.269953	0.084229	0.41	0.362	2453.33
Phospho2	0.10324	0.0842231	0.241	0.152	1270.47
Gm48914	0.0188051	0.0842179	0.096	0.019	260.977
Pnp	0.0360627	0.0842011	0.12	0.038	487.027
D3Ertd254e	0.0977329	0.0841417	0.349	0.238	1212.38
Cyb5a	0.316056	0.0841413	0.494	0.476	2691.53
Atf1	0.279562	0.0841086	0.217	0.162	2503.2
Myl12a	0.10935	0.0840729	0.181	0.105	1333.74
Ar	0.318215	0.0838975	0.892	0.876	2701.97
Tbc1d5	0.0860363	0.0838848	0.169	0.086	1081.05
B3glct	0.0699634	0.0838647	0.133	0.057	898.05
Eif2ak1	0.122778	0.083843	0.398	0.276	1454.79
Epc2	0.297935	0.0838367	0.482	0.438	2597.1
Fam184a	0.186556	0.0838274	0.277	0.19	2042.23
Ahsa1	0.282759	0.0838156	0.542	0.524	2518.25
Med23	0.0363776	0.0837689	0.169	0.067	491.098
Prrc2c	0.181017	0.0837655	0.771	0.79	1993.91
Pkn2	0.198105	0.0837406	0.554	0.476	2141.12
Atg16l1	0.143526	0.0836383	0.398	0.314	1650.4
0610040B10Rik	0.350193	0.0836076	0.217	0.162	2864.23
Nek1	0.158104	0.083568	0.241	0.162	1793.05
Slmap	0.285121	0.083473	0.41	0.352	2527.88
Tpd52l1	0.180577	0.0834236	0.53	0.41	1990.68
Ewsr1	0.560398	0.0834136	0.699	0.714	2734.74
Ttc9b	0.310218	0.0833813	0.53	0.505	2660.12
Ica1	0.113302	0.0833481	0.289	0.2	1356.22
Dnajc24	0.0241559	0.0833442	0.072	0.01	332.144
Klhdc2	0.21502	0.0832805	0.506	0.448	2216.43
Preb	0.399257	0.0832605	0.313	0.276	2772.44
Spopl	0.168818	0.083246	0.373	0.286	1893.13
Celf5	0.0973406	0.0832215	0.904	0.914	1208.29
Cwc25	0.537208	0.083207	0.217	0.2	2724.18
Gnai3	0.168954	0.0831427	0.241	0.171	1894.15
Tram1	0.226728	0.0831389	0.458	0.381	2309.46
Zfp362	0.0464709	0.0831161	0.133	0.048	616.204
Lztfl1	0.190749	0.0830887	0.687	0.571	2077.45
Ctdspl2	0.202061	0.0830333	0.361	0.286	2177.21
Nanos1	0.102548	0.0830032	0.41	0.314	1263.19
Prr14l	0.0870623	0.0829775	0.277	0.171	1092.63
Banf1	0.489257	0.0829687	0.41	0.4	2721.74
Agpat4	0.442115	0.0829531	0.614	0.552	2764.54
Zfc3h1	0.282102	0.0829525	0.277	0.229	2517.48
Tfdp1	0.410558	0.0829304	0.313	0.295	2794.26
Clock	0.180781	0.0829023	0.675	0.629	1992.39
Kdelr2	0.375568	0.0828878	0.41	0.352	2980.88
Ep400	0.536822	0.0828661	0.494	0.467	2724.37
Wdfy3	0.466155	0.0828548	0.687	0.695	2748.45
Wnk1	0.276774	0.0828173	0.699	0.657	2490.14
Tesc	0.113844	0.0827653	0.145	0.076	1361.24
Dpy19l1	0.480397	0.0826204	0.253	0.219	2726.25
Eif4g2	0.346188	0.082614	0.988	0.962	2844.62
Bicra	0.0431396	0.0825949	0.145	0.057	575.828
Ccdc137	0.065886	0.0825704	0.253	0.152	849.534
Ttc33	0.292365	0.0825334	0.627	0.571	2569.59
Hcfc2	0.2292	0.0824714	0.241	0.171	2327.98
Esyt2	0.142112	0.0823803	0.398	0.286	1636.7
Gnpat	0.145706	0.0823723	0.337	0.248	1672.13
Armcx5	0.199091	0.0823348	0.265	0.2	2149.78
Mterf3	0.0996169	0.0823341	0.145	0.076	1232.76
Cnih1	0.423246	0.0822787	0.627	0.59	2823.05
Arih1	0.218022	0.0822429	0.506	0.429	2241.92
Ppp1cc	0.435831	0.0821326	0.554	0.514	2786.27
Dnmt3a	0.35157	0.081964	0.602	0.533	2872.68
Cdk9	0.275558	0.0819521	0.422	0.4	2481.4
Smyd5	0.19127	0.0819471	0.434	0.343	2081.97
Wapl	0.294941	0.0818727	0.482	0.476	2583.69
Faxc	0.0597437	0.0818605	0.133	0.057	775.712
Lman1	0.216779	0.0818585	0.361	0.276	2232.17
Slc4a1ap	0.143484	0.0818581	0.229	0.152	1650.2
Yod1	0.429166	0.0817819	0.337	0.295	2808.46
Rnf166	0.104546	0.0817754	0.301	0.19	1284.03
2410004B18Rik	0.394264	0.0817462	0.386	0.343	2763.79
Dpysl5	0.275254	0.0817218	0.53	0.438	2479.76
Atxn1l	0.123276	0.0817129	0.205	0.124	1450.71
Nfya	0.0450787	0.081706	0.096	0.029	598.871
Yeats4	0.337352	0.0817004	0.434	0.371	2796.64
Rbm8a	0.165103	0.0816932	0.711	0.533	1860.54
Tmem107	0.0866409	0.0816608	0.241	0.143	1087.86
Lrp12	0.248386	0.0816539	0.277	0.21	2476.41
Cdc42se2	0.248889	0.0815821	0.663	0.61	2479.68
Zcchc11	0.39285	0.0815524	0.614	0.571	2757.41
Zfp866	0.125113	0.081547	0.181	0.105	1469.83
Bmi1	0.110206	0.0814093	0.458	0.362	1342.86
Ube2k	0.392687	0.0813472	0.759	0.705	2757.06
Arhgef18	0.402055	0.0813253	0.229	0.19	2776.59
Irf3	0.0469055	0.0813187	0.157	0.067	621.545
Capns1	0.721653	0.0811983	0.711	0.724	2296.3
Prkab2	0.133234	0.0811714	0.325	0.219	1550.31
Best1	0.0171221	0.0811391	0.096	0.019	238.323
Ext1	0.185007	0.0811011	0.253	0.171	2028.23
Ei24	0.448603	0.0810231	0.518	0.476	2761.15
Vgll4	0.108054	0.0810209	0.108	0.048	1319.34
Rps6ka2	0.362679	0.0810014	0.494	0.438	2928.63
Ovgp1	0.0111738	0.0809716	0.06	0	157.26
Kctd18	0.126629	0.080882	0.193	0.114	1485.23
Slc12a7	0.0375788	0.0807891	0.084	0.019	506.374
Heatr6	0.248147	0.0806893	0.313	0.238	2474.52
Mbtps2	0.193197	0.0805688	0.193	0.124	2097.92
Mid2	0.149935	0.0805679	0.253	0.171	1714.5
Spag1	0.123413	0.0805045	0.193	0.114	1451.83
Ppp1r17	0.156932	0.0804814	0.072	0.029	1781.97
Ankrd24	0.351576	0.080362	0.361	0.314	2872.38
2810474O19Rik	0.277622	0.080342	0.398	0.333	2493.05
Vps9d1	0.201692	0.080324	0.349	0.276	2174.04
Lrrn2	0.375427	0.0803082	0.494	0.476	2980.89
Prpf18	0.363274	0.0803056	0.398	0.343	2931.25
Iscu	0.489014	0.0802187	0.807	0.762	2721.37
Farp1	0.274325	0.0802055	0.157	0.114	2475.78
Gas8	0.118325	0.0801889	0.157	0.086	1407.84
Abcd1	0.0380097	0.0801844	0.133	0.048	511.725
Gm28913	0.0053077	0.0801543	0.072	0	75.6453
Gm26853	0.314822	0.0801076	0.241	0.19	2686.38
Psmc2	0.411222	0.0800974	0.301	0.257	2793.02
Ube2j2	0.470846	0.0800612	0.446	0.448	2742.21
Mgat1	0.386515	0.0800367	0.41	0.352	2737.69
Insm1	0.113357	0.0800251	0.108	0.048	1356.54
Zfp950	0.146353	0.0800129	0.639	0.524	1678.23
Dennd5b	0.316546	0.0800026	0.783	0.771	2694.13
Unc79	0.575954	0.079939	0.301	0.276	2731.75
March1	0.134586	0.0799205	0.325	0.219	1563.75
Fem1b	0.301255	0.0798073	0.831	0.743	2615.8
Slc7a6os	0.233486	0.0797878	0.205	0.143	2361.24
Maml3	0.188823	0.0797515	0.253	0.171	2061.95
Mrps5	1	0.0797324	0.494	0.533	28
Trim8	0.165396	0.0797148	0.41	0.333	1863.69
Mplkip	0.0696446	0.0797046	0.265	0.152	894.376
Usp47	0.212194	0.079656	0.566	0.495	2197.7
Il2	0.0113581	0.0796457	0.084	0.01	159.764
Dvl3	0.292322	0.079643	0.265	0.21	2569.51
Tbc1d19	0.191731	0.0796249	0.193	0.124	2085.46
Kbtbd11	0.244826	0.0795498	0.41	0.314	2451.69
Cep57l1	0.0742581	0.0795479	0.133	0.057	945.677
Srsf12	0.553084	0.0795461	0.47	0.457	2730.02
Tusc3	0.234216	0.0795302	0.723	0.648	2367.69
Wfs1	0.104395	0.0794827	0.361	0.248	1282.28
Dact2	0.0416404	0.0794603	0.096	0.029	557.273
Zfand1	0.138369	0.0794256	0.205	0.124	1601.76
Tmem230	0.107636	0.0793494	0.205	0.124	1315.53
Uros	0.114146	0.0793101	0.193	0.114	1364.27
Tox4	0.407193	0.0792974	0.506	0.457	2788.87
Gck	0.141032	0.0792868	0.325	0.219	1625.96
Kif21a	0.352898	0.0792589	0.916	0.886	2874.35
Odf2	0.756224	0.0792255	0.651	0.648	2149.95
Fzd5	0.0143385	0.0792119	0.12	0.029	200.567
Fundc1	0.17166	0.0789864	0.602	0.571	1916.75
Slitrk6	0.544124	0.0789417	0.193	0.162	2723.34
Letm1	0.0513678	0.0788895	0.41	0.267	673.072
Bcl9	0.39774	0.0786879	0.614	0.61	2767.87
Orc5	0.309722	0.0786775	0.229	0.181	2658.03
Pde7a	0.0777518	0.0786763	0.301	0.19	986.438
Tmem39a	0.0515582	0.0786502	0.157	0.067	675.516
Rasgef1a	0.316791	0.078643	0.88	0.867	2695.26
Exoc1	0.160595	0.0785807	0.422	0.333	1817.3
Sema3f	0.0950649	0.078573	0.169	0.086	1182.7
Atf4	0.128303	0.078552	0.651	0.571	1501.4
Pias1	0.440624	0.0785434	0.494	0.486	2787.39
Zfp90	0.157954	0.0784682	0.217	0.133	1791.68
Lrrtm2	0.49073	0.0784526	0.554	0.571	2724.53
Arf6	0.105505	0.0784499	0.313	0.21	1293.91
Maml2	0.167332	0.078397	0.096	0.048	1879.97
Mettl23	0.18136	0.0783957	0.205	0.133	1996.77
Trmu	0.260229	0.0783863	0.241	0.19	2561.7
Ice2	0.185924	0.0783723	0.145	0.086	2036.24
Nfu1	0.153523	0.0783668	0.482	0.41	1749.85
Rbm22	0.233342	0.0783334	0.253	0.19	2360.02
Pwp1	0.0923257	0.0783321	0.217	0.124	1152.59
Ltbp4	0.190473	0.0783292	0.217	0.152	2075.39
Edc4	0.394595	0.0782733	0.193	0.152	2764.53
Pold3	0.238636	0.0782464	0.301	0.229	2402.59
Eif3b	0.449202	0.0782426	0.446	0.429	2763.04
Ubtf	0.277602	0.0782342	0.373	0.305	2493.15
Lyrm2	0.329153	0.0782069	0.301	0.257	2754.68
Cyfip1	0.326276	0.0781961	0.145	0.105	2739.42
Tln1	0.203822	0.0781954	0.578	0.495	2192.52
Abt1	0.0897141	0.0781509	0.181	0.095	1122.32
Sept7	0.385763	0.0781129	0.88	0.867	2735.06
Fam167a	0.0450787	0.0780956	0.096	0.029	598.826
Hexim1	0.30353	0.0780876	0.313	0.248	2625.23
Slc30a10	0.301323	0.0780834	0.217	0.162	2614.89
Zcrb1	0.421432	0.0780516	0.916	0.829	2817.27
Psme4	0.370662	0.0780449	0.253	0.21	2960.11
Ndufa7	0.0936714	0.0780392	0.831	0.695	1167.33
Mical2	0.161284	0.0780072	0.289	0.21	1823.96
Gm3667	0.224691	0.0779489	0.145	0.086	2292.29
Yme1l1	0.191746	0.077906	0.651	0.61	2085.43
Cbx1	0.399361	0.0778893	0.506	0.467	2772.77
Mpv17l2	0.0325387	0.0778682	0.12	0.038	441.616
Dmkn	0.0053077	0.0778541	0.072	0	75.64
Galnt10	0.0987773	0.0778082	0.193	0.105	1223.06
Slc17a5	0.157626	0.0777915	0.253	0.171	1788.43
Oxr1	0.31266	0.0777021	0.639	0.562	2675.12
Oser1	0.125318	0.0776691	0.157	0.086	1471.74
9930104L06Rik	0.116168	0.0776652	0.145	0.076	1385.08
Trim35	0.261931	0.077649	0.928	0.905	2575.3
Spata1	0.0111738	0.0775794	0.06	0	157.249
Ccnl2	0.259759	0.0774705	0.651	0.552	2558.88
Poldip3	0.340054	0.0774652	0.434	0.39	2811.91
Rhot2	0.413939	0.0774332	0.386	0.352	2801.13
Phyhipl	0.213068	0.0774259	0.723	0.667	2205.04
Med14	0.302728	0.0774247	0.398	0.314	2621.02
Pex2	0.254174	0.0773901	0.193	0.143	2521.66
1110059E24Rik	0.556661	0.0773857	0.373	0.343	2734.32
Rps6kb1	0.340109	0.0773819	0.602	0.543	2811.34
Dnttip2	0.0674859	0.0773632	0.133	0.057	868.408
Srpr	0.258718	0.0772485	0.566	0.476	2551.47
Ppid	0.2936	0.0772441	0.506	0.457	2575.75
Rasl11b	0.0325387	0.0771837	0.12	0.038	441.583
Rgs3	0.0823307	0.0771762	0.157	0.076	1038.35
Chodl	0.0345145	0.0771628	0.12	0.038	467.084
Mxd4	0.437425	0.0771526	0.446	0.41	2779.4
Klhl1	0.243022	0.0771383	0.229	0.162	2436.78
Dusp6	0.269206	0.0770339	0.145	0.095	2453.54
Trps1	0.44605	0.0769686	0.289	0.248	2758.37
Proser1	0.112598	0.0769473	0.446	0.314	1349.38
Gt(ROSA)26Sor	0.208949	0.0769095	0.349	0.286	2231.15
Hjurp	0.285801	0.0768951	0.446	0.41	2533.05
Rngtt	0.263672	0.0767504	0.458	0.41	2585.3
Odf2l	0.114822	0.0765647	0.265	0.162	1371.21
Pibf1	0.126657	0.0765292	0.217	0.133	1485.44
B3galnt1	0.273402	0.0765237	0.494	0.438	2474.56
Ecd	0.20734	0.0765205	0.349	0.267	2218.54
U2surp	0.2652	0.0764752	0.723	0.676	2596.84
Tmem170b	0.349918	0.076467	0.373	0.305	2863.38
Itga6	0.191688	0.0764537	0.181	0.114	2085.38
Sobp	0.652606	0.0764519	0.711	0.733	2629.35
Ccdc65	0.118825	0.0764211	0.133	0.067	1413.18
Hbs1l	0.157333	0.0763528	0.277	0.181	1785.58
Alkbh6	0.275067	0.0763048	0.325	0.267	2478.9
Nup62	0.370448	0.0762987	0.193	0.162	2959.51
Trappc4	0.482373	0.076285	0.663	0.695	2725.41
Foxp1	0.556835	0.0762671	0.554	0.533	2734.62
Rubcn	0.400574	0.0762213	0.434	0.4	2774.37
Zfp707	0.0355402	0.0761973	0.12	0.038	480.396
Mpp5	0.332908	0.0761655	0.518	0.467	2775.45
Scaf8	0.185083	0.0761111	0.313	0.219	2028.88
Rps14	0.0770711	0.0760413	1	1	978.803
Herc3	0.149378	0.0760373	0.747	0.6	1708.73
Akr1e1	0.104727	0.0760057	0.169	0.095	1285.73
N4bp2l2	0.318633	0.075959	0.651	0.581	2703.92
Mfhas1	0.575835	0.0759052	0.277	0.248	2731.76
Hirip3	0.369972	0.0758271	0.229	0.181	2960.88
Sdad1	0.195352	0.0757932	0.313	0.229	2115.27
Zfp334	0.234964	0.0757926	0.349	0.276	2372.9
Cdv3	0.318783	0.075753	0.675	0.676	2704.56
Gsk3a	0.315464	0.0757361	0.639	0.638	2689.33
Pik3c3	0.13667	0.0757179	0.193	0.114	1584
Epha4	0.389273	0.0756894	0.41	0.362	2746.71
AW554918	0.358336	0.0756183	0.12	0.086	2904.67
Suv39h1	0.325446	0.0756117	0.349	0.305	2736.02
Stk26	0.0457944	0.0755075	0.096	0.029	607.691
Evl	0.810236	0.0754726	0.747	0.81	1811.69
Eif2b2	0.177243	0.0754597	0.169	0.105	1962.25
Tmod1	0.864155	0.0753138	0.169	0.171	1381.78
Manf	0.228123	0.0753102	0.422	0.343	2320.46
Fam120b	0.132337	0.075294	0.663	0.571	1541.07
1700124L16Rik	0.201916	0.0752818	0.169	0.105	2175.85
Pea15a	0.278972	0.0752771	0.952	0.895	2499.59
Appl1	0.102578	0.0752193	0.663	0.6	1263.46
Nip7	0.302288	0.0752128	0.289	0.238	2620.23
L2hgdh	0.272001	0.0751877	0.229	0.171	2466.24
Fus	0.242368	0.0751474	0.952	0.886	2432.41
Dcaf1	0.101528	0.0751316	0.337	0.219	1252.96
Aldh6a1	0.404158	0.0751004	0.277	0.229	2783.03
Tmem117	0.213578	0.0750313	0.265	0.2	2209.25
Zfp938	0.103013	0.0749989	0.301	0.19	1267.99
Manba	0.243996	0.0749501	0.133	0.086	2444.6
Eif4e3	0.254312	0.0749422	0.301	0.229	2522.01
Pstk	0.535008	0.0748904	0.518	0.486	2724.79
Dopey1	0.230044	0.0747995	0.542	0.457	2334.25
Smim10l1	0.229687	0.0746657	0.976	0.943	2331.56
Sec61b	0.578018	0.0745692	0.699	0.714	2731.13
Tor1b	0.40924	0.0745392	0.277	0.248	2790.2
Vwa5b1	0.245945	0.0745343	0.205	0.152	2459.21
Prr5	0.0834671	0.0744873	0.169	0.086	1051.1
Aftph	0.392838	0.0744691	0.482	0.448	2757.73
Birc2	0.497057	0.0744601	0.289	0.257	2720.89
Smco4	0.514077	0.0744573	0.229	0.2	2718.44
Prmt8	0.428281	0.0744531	0.108	0.076	2808.24
Saysd1	0.130463	0.0744355	0.193	0.114	1522.37
Dhx9	0.231159	0.0744017	0.518	0.448	2343.25
Mtus2	0.319682	0.0744001	0.349	0.295	2705.79
Fzd3	0.387034	0.0743973	0.542	0.514	2739.81
Gfod1	0.390592	0.0743609	0.253	0.21	2751.72
Dync2h1	0.264129	0.074355	0.542	0.467	2589.52
Itga2b	0.477204	0.0743435	0.133	0.105	2736.76
Atp6v1c1	0.268467	0.0743029	0.843	0.886	2448.42
Usp48	0.402147	0.0742777	0.361	0.305	2776.82
Cavin2	0.120929	0.0742442	0.145	0.076	1435.3
Furin	0.273813	0.0742374	0.193	0.143	2476.36
Gm14305	0.368575	0.0742259	0.301	0.238	2955.24
Tsen2	0.264571	0.0741977	0.193	0.133	2593.33
Zfp871	0.173786	0.0741535	0.349	0.248	1934.24
Bloc1s5	0.294016	0.0741316	0.241	0.181	2577.05
Ahdc1	0.514323	0.0740834	0.494	0.505	2716.14
Timm21	0.0944859	0.0740408	0.096	0.038	1176.16
Lrp1b	0.301866	0.0739701	0.976	0.962	2618.39
Ccdc84	0.319531	0.0738981	0.229	0.171	2705.47
Lrrc7	0.314314	0.07389	0.542	0.476	2683.61
Rsph4a	0.0948409	0.073848	0.12	0.057	1180.1
Alg9	0.178716	0.0738395	0.169	0.105	1974.81
Hdac2	0.382912	0.0738186	0.506	0.457	2723.65
Asf1a	0.559085	0.0737982	0.157	0.133	2736.16
Pes1	0.241439	0.0737375	0.229	0.162	2425.73
2700097O09Rik	0.549878	0.0736977	0.277	0.248	2729.59
Bbs7	0.18319	0.0736874	0.169	0.105	2011.24
Sppl2b	0.122112	0.0736772	0.217	0.133	1447.63
Plcxd3	0.0884688	0.0735594	0.506	0.371	1108.69
Brd7	0.598429	0.073547	0.422	0.371	2705.5
Tsc1	0.324207	0.07353	0.675	0.61	2730.15
Mapkbp1	0.214931	0.0735165	0.265	0.2	2215.73
Cwc27	0.202291	0.0735029	0.169	0.114	2179.28
Cldn1	0.090362	0.0734836	0.084	0.029	1130.16
Cryab	0.0123979	0.073407	0.084	0.01	174.017
Zmat1	0.597139	0.073382	0.422	0.4	2711.61
Tet1	0.076581	0.0733298	0.277	0.171	972.808
Cep170	0.160109	0.0733095	0.639	0.543	1812.6
Opcml	0.7184	0.0732432	0.771	0.81	2303.91
Lypd1	0.313222	0.0732192	0.506	0.419	2678.99
Selenoo	0.317031	0.073151	0.181	0.133	2696.98
Rps10	0.121957	0.0731168	1	1	1446.17
Pcdhb7	0.42855	0.0730622	0.084	0.057	2807
Fam160a1	0.0111738	0.0730145	0.06	0	157.238
Kbtbd2	0.737601	0.0729113	0.422	0.41	2223.87
Kcnt2	0.171578	0.0728864	0.145	0.086	1916.35
Ppm1h	0.6918	0.0728354	0.313	0.324	2545.13
Fank1	0.271888	0.0728334	0.108	0.067	2465.75
Fbxl15	0.216909	0.0728214	0.181	0.114	2233.08
Tmeff2	0.233274	0.0728168	0.494	0.41	2359.57
P2ry1	0.0150881	0.0727924	0.12	0.029	210.856
Zbtb11	0.345745	0.0727565	0.554	0.467	2842.37
Atl1	0.645581	0.0727527	0.699	0.695	2645.59
Samd8	0.426175	0.0727491	0.494	0.438	2800.4
Rpf1	0.123911	0.0727154	0.169	0.095	1457.07
Wdr27	0.182674	0.0727039	0.157	0.095	2006.67
Utp3	0.56257	0.0726953	0.434	0.381	2734.65
Gucd1	0.164848	0.0726741	0.12	0.067	1858
Tmco1	0.599639	0.0726575	0.434	0.41	2705.57
D430042O09Rik	0.44811	0.0726354	0.349	0.295	2760.81
Gm15261	0.0123979	0.0725713	0.084	0.01	174.005
Junb	0.169227	0.0724968	0.096	0.048	1896.53
Sh3kbp1	0.309477	0.0724866	0.361	0.286	2657.17
Mthfd2	0.0972783	0.0724807	0.217	0.124	1207.71
Iqgap2	0.0691293	0.0724683	0.072	0.019	888.242
Eif4enif1	0.560372	0.0724295	0.325	0.295	2735.18
Gm47512	0.116414	0.0723633	0.12	0.057	1387.89
Glce	0.335549	0.0723463	0.337	0.267	2787.07
P4ha1	0.134894	0.0722811	0.253	0.152	1566.79
Gm15728	0.0481414	0.0722154	0.108	0.038	636.862
Msl3l2	0.127343	0.0721983	0.181	0.105	1492.2
Gm17354	0.205644	0.0721718	0.205	0.143	2209.24
Kif5b	0.491779	0.0721685	0.916	0.857	2720.03
Crip2	0.652392	0.0721658	0.494	0.476	2629.79
Bach1	0.0406715	0.0721404	0.133	0.048	545.12
Stxbp4	0.284308	0.072083	0.205	0.152	2524.37
Mcf2l	0.495735	0.0720658	0.542	0.543	2719.6
Phc3	0.447738	0.0720064	0.506	0.486	2762.09
Dgkk	0.504346	0.0719507	0.301	0.257	2718.42
P4ha2	0.0867784	0.0718519	0.157	0.076	1089.42
Dusp26	0.302344	0.0718078	0.807	0.724	2620.12
Ccdc90b	0.0495073	0.0718047	0.145	0.057	653.645
Gm9493	0.937474	0.0717947	0.349	0.371	593.421
Cfl2	0.283437	0.0717805	0.855	0.771	2520.32
Cul4a	0.352187	0.0717431	0.386	0.343	2874.2
Tmem243	0.265698	0.071713	0.373	0.305	2431.93
Acsbg1	0.0241559	0.0717004	0.072	0.01	332.12
Rplp2	0.136243	0.0716698	1	1	1580.29
Rpp21	0.523598	0.071656	0.47	0.438	2713.81
Zbtb24	0.0668787	0.0716506	0.12	0.048	861.264
Smurf2	0.258	0.0716202	0.169	0.114	2548.53
Immp1l	0.196918	0.0716047	0.361	0.286	2129.86
Ice1	0.200577	0.0715649	0.446	0.352	2164.42
Gfra2	0.509325	0.0715388	0.217	0.19	2717.25
Zfp383	0.219169	0.071528	0.217	0.152	2247.14
Ndufs3	0.146901	0.0715134	0.386	0.314	1684.07
Cmss1	0.0118679	0.0714821	0.084	0.01	166.768
Triap1	0.312838	0.0714816	0.289	0.229	2676.32
Dnajc11	0.307528	0.0714657	0.422	0.381	2646.58
Cttn	0.284802	0.0714294	0.627	0.59	2526.48
Zfp72	0.18739	0.0713366	0.157	0.095	2048.92
Col12a1	0.0752424	0.0712756	0.072	0.019	957.384
Chmp1b	0.37132	0.0712519	0.169	0.124	2963.5
Cthrc1	0.494875	0.0712276	0.289	0.257	2717.86
Tmem165	0.336248	0.071139	0.289	0.238	2791.53
Nrp1	0.79515	0.071104	0.349	0.352	1918.7
Efna3	0.359013	0.0710765	0.253	0.21	2906.93
Kcnn3	0.110325	0.0710278	0.133	0.067	1343.97
Ncoa3	0.267116	0.0710169	0.145	0.095	2440.9
Rimbp2	0.529944	0.0709886	0.337	0.343	2719.15
Map10	0.0356139	0.0709796	0.084	0.019	481.251
Fbxw9	0.0967143	0.0709687	0.229	0.133	1201.67
Selenof	0.432726	0.0709337	0.747	0.676	2799.74
Pacsin1	0.241117	0.0709327	0.855	0.79	2422.75
Naa20	0.566884	0.0709183	0.361	0.362	2735.78
Raf1	0.390848	0.0708775	0.349	0.295	2752.74
Sox1	0.120967	0.0708771	0.241	0.152	1435.64
Atp6v1h	0.468663	0.0708444	0.602	0.619	2747.3
Ash1l	0.175927	0.0708158	0.819	0.762	1951.56
Tppp3	0.241539	0.0708143	0.506	0.467	2426.02
Cystm1	0.349296	0.0708032	0.301	0.248	2860.38
Cnppd1	0.131848	0.0707642	0.133	0.067	1536.3
Vac14	0.161379	0.0707521	0.217	0.143	1824.55
Aifm1	0.0998032	0.0707485	0.241	0.143	1233.87
Ramp3	0.00621761	0.0707276	0.096	0.01	88.3772
Chic1	0.372792	0.0706319	0.566	0.524	2968.91
Dhodh	0.221519	0.0706245	0.229	0.162	2266.14
D11Wsu47e	0.146517	0.0705847	0.072	0.029	1679.96
Arid4b	0.352297	0.0705685	0.747	0.686	2873.69
Cmtr1	0.546302	0.0705535	0.458	0.419	2724.95
Sri	0.252133	0.0705416	0.422	0.371	2505.95
Fktn	0.271295	0.0705269	0.422	0.352	2462
Gm20696	0.0976665	0.0704826	0.096	0.038	1211.75
Xkr8	0.0191586	0.0704351	0.096	0.019	265.729
Zfp873	0.0540257	0.0704152	0.157	0.067	705.684
Hnrnpm	0.58674	0.0703858	0.506	0.476	2722.47
Ddx42	0.207426	0.0703192	0.602	0.543	2219.25
Tiprl	0.672176	0.070303	0.458	0.476	2596.61
Ogfod2	0.178504	0.070299	0.241	0.162	1973.18
Hdac3	0.448379	0.0702847	0.47	0.429	2760.67
Ldah	0.327636	0.0702119	0.241	0.181	2747.23
Lin37	0.283407	0.0700865	0.289	0.229	2520.62
Kcnk10	0.0314082	0.0700094	0.157	0.057	427.026
Marcksl1	0.353133	0.0699187	0.94	0.981	2875.21
Agtrap	0.378498	0.0698956	0.181	0.143	2995.81
Tmem229a	0.0508847	0.0698774	0.205	0.105	670.304
Gusb	0.328406	0.0698687	0.229	0.181	2750.73
Rp9	0.103692	0.0698115	0.928	0.867	1275.2
Eri3	0.462467	0.0697951	0.651	0.638	2749.36
Cd82	0.186425	0.0697785	0.108	0.057	2040.98
Kcns2	0.272218	0.0697035	0.47	0.381	2467.65
Klhl5	0.185555	0.0696954	0.12	0.067	2033.68
Acot13	0.58573	0.0696843	0.398	0.39	2721.3
Slc50a1	0.274279	0.0696407	0.325	0.257	2475.91
Fdx1	0.497042	0.0696358	0.361	0.343	2721.8
BC022687	0.177848	0.06958	0.145	0.086	1967.89
Arrdc3	0.0725151	0.0695694	0.133	0.057	928.193
Rasl10b	0.301735	0.0695328	0.386	0.295	2617.85
Fcho2	0.243979	0.0695267	0.277	0.21	2444.66
Nup43	0.276535	0.0695115	0.096	0.057	2488.26
Zfp513	0.0790314	0.0694624	0.205	0.105	1000.85
1700088E04Rik	0.472324	0.0694538	0.12	0.095	2745.14
Fam177a	0.0169727	0.0693965	0.12	0.029	236.396
Ptgds	0.071268	0.0693536	0.12	0.048	913.656
Ccnd1	0.0257505	0.069353	0.072	0.01	353.245
Gm5617	0.413839	0.0693505	0.181	0.143	2801.69
Atraid	0.665778	0.0692411	0.47	0.467	2607.19
Ern1	0.110067	0.0691109	0.12	0.057	1341.39
Myo16	0.0293591	0.0690905	0.108	0.029	400.664
Tpra1	0.377008	0.0690459	0.205	0.152	2988.17
Csnk1g1	0.371017	0.0689647	0.325	0.276	2962.2
Chst12	0.185808	0.0689623	0.157	0.095	2035.34
Kcns3	0.0053077	0.0689503	0.072	0	75.6347
Wdr78	0.0983138	0.0689033	0.096	0.038	1218.21
Ccdc138	0.0571092	0.0688096	0.108	0.038	743.504
Tril	0.0308098	0.0687955	0.108	0.029	419.26
Pcbd1	0.647176	0.0687866	0.675	0.667	2644.36
Dbt	0.187746	0.0687287	0.169	0.105	2051.88
Lins1	0.246018	0.068632	0.108	0.067	2459.69
Cngb1	0.0715237	0.0685741	0.072	0.019	916.576
Arhgef2	0.193193	0.0685097	0.265	0.19	2098.07
Rbmx2	0.181689	0.0684653	0.169	0.105	1999.31
Mepce	0.17932	0.0684271	0.277	0.19	1979.88
Cdkl4	0.417891	0.0684134	0.084	0.057	2811.99
Tacc1	0.227206	0.0683394	0.554	0.505	2313.19
Cyth1	0.642688	0.0683232	0.289	0.267	2652.37
Zfp202	0.0651865	0.0682658	0.12	0.048	840.71
Arhgap20	0.11118	0.0682431	0.578	0.457	1352.84
Cfap97	0.393165	0.0682362	0.554	0.495	2758.45
Gtf3a	0.278746	0.068166	0.301	0.238	2498.68
Phf12	0.19125	0.0680712	0.41	0.324	2081.95
Msantd2	0.0923695	0.0680641	0.157	0.076	1153.05
Gsta4	0.273102	0.068056	0.06	0.029	2474.03
Eif5b	0.255999	0.0680367	0.867	0.895	2534.13
Imp3	0.445892	0.0679471	0.41	0.371	2758.73
Gyg	0.169879	0.0679285	0.241	0.162	1901.79
Ccdc189	0.0970243	0.0679209	0.096	0.038	1205.14
Syt1	0.93103	0.0678427	0.855	0.829	646.135
Nars2	0.176372	0.0678263	0.133	0.076	1955.62
Ptges3	0.228625	0.0678045	0.952	0.943	2323.98
Cnpy4	0.103609	0.0677863	0.096	0.038	1274.5
Glt28d2	0.101714	0.0677675	0.048	0.01	1255.05
Upf2	0.341966	0.0677586	0.518	0.457	2820.54
Usp25	0.122142	0.0677459	0.145	0.076	1447.88
Slc39a6	0.397709	0.0676087	0.59	0.514	2768.45
Fam241b	0.372805	0.0675917	0.325	0.276	2968.65
Cdh24	0.568051	0.0675496	0.157	0.133	2730.06
Mettl26	0.516844	0.0675393	0.506	0.457	2713.43
Hmgn2	0.37276	0.0675184	0.663	0.638	2969.41
Grb14	0.138154	0.0674433	0.169	0.095	1599.69
Syne4	0.0472544	0.0674379	0.096	0.029	625.838
Zkscan5	0.127092	0.0673964	0.145	0.076	1489.9
Mmd	0.69624	0.067393	0.699	0.686	2524.57
Slc7a1	0.415734	0.0673643	0.458	0.429	2805.38
Utp18	0.173269	0.0673514	0.217	0.143	1929.53
Ier3ip1	0.406901	0.0672866	0.783	0.676	2787.68
Ptpn4	0.46069	0.0672664	0.349	0.314	2754.01
Lsm4	0.417983	0.0672427	0.337	0.286	2811.77
Mrps36	0.359807	0.067225	0.482	0.438	2912.28
Zfp316	0.242976	0.0671373	0.133	0.086	2436.57
Krt10	0.719022	0.0671238	0.337	0.333	2298.71
Ppargc1a	0.485785	0.0670883	0.229	0.19	2719.91
Hmgn5	0.291518	0.067051	0.12	0.076	2564.48
Med6	0.178946	0.0670226	0.096	0.048	1976.82
Arfgap3	0.220407	0.066953	0.289	0.21	2258.07
Mrpl57	0.381953	0.0669525	0.542	0.495	2720.27
Ppp4r4	0.619599	0.0669521	0.277	0.267	2669.23
Zfp944	0.111098	0.0669412	0.193	0.105	1352.29
Trmt11	0.18923	0.0669095	0.145	0.086	2064.31
Sumf2	0.180206	0.0668459	0.12	0.067	1987.31
Wiz	0.205644	0.0668146	0.205	0.143	2209.03
Hif1an	0.140637	0.0668104	0.205	0.124	1622.39
Mrps11	0.334494	0.0667897	0.289	0.238	2784.33
Baz2b	0.196007	0.066779	0.386	0.286	2121.39
Lta4h	0.129967	0.0667509	0.12	0.057	1517.88
Ppip5k2	0.275067	0.0666969	0.337	0.257	2478.63
Rec8	0.405158	0.0666807	0.157	0.114	2786.67
Kcnc4	0.326454	0.06664	0.422	0.352	2739.6
Ppp1r2	0.339157	0.0666202	0.819	0.733	2807.55
Rab26	0.505834	0.066583	0.289	0.257	2716.33
Rabl3	0.0923695	0.0665506	0.157	0.076	1152.96
Cald1	0.539221	0.0665492	0.181	0.152	2721.45
6230400D17Rik	0.06209	0.0665388	0.108	0.038	804.128
Cflar	0.237102	0.066521	0.145	0.095	2389.99
Ptchd1	0.131388	0.0664962	0.157	0.086	1531.72
Rsph10b	0.0727462	0.0664902	0.072	0.019	930.86
Zfhx4	0.0970708	0.0664482	0.904	0.838	1205.43
Smim3	0.0236851	0.0664169	0.048	0	326.452
H13	0.581638	0.0664066	0.614	0.571	2726.14
Crcp	0.400568	0.066399	0.241	0.2	2774.74
Coq3	0.179534	0.0663804	0.301	0.219	1981.34
Onecut2	0.0999889	0.0663707	0.084	0.029	1235.76
Pop7	0.22745	0.0663446	0.289	0.219	2314.99
Sfxn1	0.356878	0.0663273	0.843	0.819	2897.13
Mfap1a	0.480975	0.0662497	0.337	0.305	2726.65
Enc1	0.390476	0.0662497	0.783	0.714	2751.3
Lca5l	0.0210142	0.0662311	0.096	0.019	290.627
Cmc2	0.714319	0.0662044	0.301	0.286	2364.4
Fbxo5	0.0231411	0.0661762	0.072	0.01	319.115
Ubr2	0.503183	0.066169	0.494	0.438	2718.19
Ppargc1b	0.518616	0.0660665	0.301	0.276	2713.92
Etfb	0.382897	0.0660409	0.145	0.105	2723.93
Syce2	0.0905332	0.0660147	0.145	0.067	1132.12
Ralgps1	0.703476	0.0660082	0.506	0.514	2450.21
Cox17	0.158444	0.0660035	0.964	0.971	1796.59
Uri1	0.310178	0.0659802	0.53	0.486	2660.09
2700081O15Rik	0.258999	0.0659779	0.181	0.124	2553.47
Umad1	0.547043	0.0659755	0.639	0.648	2726.46
Dnajb5	0.246391	0.0659411	0.157	0.105	2462.19
Gpr176	0.19597	0.065941	0.145	0.086	2121.18
Mobp	0.0503602	0.0658891	0.157	0.067	663.849
Stt3a	0.241935	0.0658715	0.458	0.39	2429.51
Sac3d1	0.283073	0.0658584	0.193	0.143	2520.2
Khk	0.109361	0.0658272	0.108	0.048	1333.76
Rpl7a	0.346192	0.0658041	1	1	2844.31
Rce1	0.126514	0.06577	0.157	0.086	1484.26
[truncated: 12,682 more rows]

## Sheet: P50FvsP50M_Vgat3
	p_val	avg_logFC	pct.1	pct.2	p_val_adjust
Xist	3.83263e-43	3.55223	1	0	5.26067e-39
Cck	0.00547136	0.904773	0.123	0.027	73.6719
Tsix	1.36273e-06	0.701269	0.193	0	0.0186953
Slc24a5	0.000165728	0.672589	0.553	0.373	2.26948
Plp1	1.67129e-05	0.670943	0.333	0.109	0.229167
Xpo1	0.00255866	0.637541	0.263	0.127	34.7517
Robo1	0.000814229	0.57188	0.289	0.127	11.115
Penk	0.148498	0.570365	0.14	0.082	1635.85
Yipf4	0.00221404	0.544592	0.298	0.145	30.0999
Hnrnph1	0.00150729	0.542608	0.526	0.4	20.5248
Ebf1	0.0884093	0.533937	0.026	0	1046.06
Cpne4	0.00980709	0.533655	0.184	0.073	130.925
Spock3	0.00315573	0.53135	0.561	0.464	42.7885
Col4a2	0.00434703	0.527928	0.211	0.082	58.8066
Gabrg2	4.14439e-06	0.524639	0.772	0.573	0.0568445
Vstm2l	0.00255669	0.516212	0.544	0.409	34.7275
Vstm2a	0.0170192	0.514278	0.518	0.436	223.836
Nptn	0.000114291	0.505144	0.746	0.627	1.56578
Elof1	0.00983218	0.494971	0.193	0.082	131.25
Rbm6	0.00657925	0.492184	0.368	0.245	88.3791
Pcyt2	0.00226879	0.484577	0.351	0.191	30.8419
Fchsd2	0.00153324	0.481438	0.237	0.091	20.875
Spred1	0.0195341	0.479856	0.237	0.136	256.209
Synpr	0.0113785	0.474703	0.272	0.145	151.539
Wsb1	0.000812939	0.473407	0.675	0.555	11.0991
Ddx3x	0.00678258	0.469811	0.368	0.245	91.09
Nts	0.0574089	0.469517	0.289	0.182	708.426
Son	0.000549118	0.453767	0.693	0.536	7.50315
AC160336.1	0.00338781	0.447463	0.57	0.418	45.915
Mest	0.0127078	0.444419	0.149	0.055	168.823
Pcdh17	0.000585242	0.439503	0.842	0.8	7.99616
Rcn2	0.00481546	0.438621	0.561	0.455	65.0183
Sacs	0.00975677	0.434604	0.167	0.064	130.282
Gm47283	0.0043163	0.433266	0.561	0.418	58.3952
Rps27rt	0.0167829	0.431562	0.263	0.145	220.83
Alcam	0.155677	0.431036	0.596	0.609	1661.7
Usp16	0.0281839	0.428443	0.202	0.109	364.051
Mbp	0.00538732	0.420393	0.263	0.118	72.578
Fut9	0.00633692	0.41867	0.64	0.564	85.1682
Ndufb10	0.102325	0.417681	0.193	0.127	1182.36
Huwe1	0.0075672	0.41311	0.588	0.491	101.506
Kdm2a	0.0155102	0.409386	0.228	0.118	204.611
Galnt13	0.557972	0.406414	0.254	0.245	2454.52
Sema3a	0.0382598	0.406093	0.123	0.045	487.162
Prpf40b	0.0121672	0.401339	0.202	0.091	161.739
Lrp8	0.0128131	0.400802	0.193	0.082	170.197
Agrn	0.03505	0.400348	0.281	0.191	448.009
Itm2b	0.00783057	0.397965	0.737	0.645	105.008
App	3.50086e-05	0.390493	0.904	0.891	0.479863
Smarca1	0.0127819	0.390377	0.14	0.045	169.795
Tspan2	0.0964572	0.389927	0.202	0.136	1121.12
Itfg1	0.00501432	0.388085	0.684	0.609	67.6282
Serpini1	0.167231	0.385641	0.325	0.282	1724.66
Gm47423	0.00459217	0.385623	0.114	0.018	62.0724
Pcdh10	0.0703792	0.385552	0.447	0.373	855.529
Ext2	0.020861	0.38267	0.237	0.127	273.133
Emc7	0.0141087	0.382436	0.474	0.373	186.899
Tram1l1	0.0106888	0.380128	0.377	0.245	142.514
Gm26699	0.000703082	0.378827	0.711	0.527	9.60199
Glo1	0.5808	0.376787	0.14	0.127	2399.87
Hacd1	0.0149094	0.376342	0.123	0.036	197.072
Sirt2	0.0434887	0.376054	0.175	0.091	548.479
Cntnap5a	0.0398343	0.375437	0.421	0.318	506.414
Rassf8	0.00901499	0.374852	0.316	0.173	120.567
Ndufs1	0.266013	0.373988	0.167	0.127	2449.98
Atrx	0.0455431	0.372555	0.421	0.355	573.069
Rpl36al	0.0839197	0.372547	0.272	0.191	997.554
Atad1	0.0403004	0.372328	0.491	0.418	512.137
Kcnt2	0.162036	0.372284	0.132	0.082	1716.44
Fam208a	0.0211194	0.372153	0.246	0.136	276.432
Syt17	0.0302706	0.372092	0.149	0.064	389.34
Zcchc7	0.00928917	0.37206	0.474	0.373	124.15
Bod1l	0.148888	0.37196	0.175	0.118	1640
Grm1	0.122251	0.371365	0.36	0.309	1382.78
Sema4g	0.014004	0.371101	0.14	0.045	185.58
Pam	0.351542	0.37007	0.439	0.427	2268.15
Hmgcl	0.0309731	0.362498	0.123	0.045	397.942
Myef2	0.0661312	0.362293	0.368	0.3	807.925
Rpl39	0.00641082	0.362104	0.693	0.573	86.1294
Cx3cl1	0.0794634	0.360352	0.5	0.455	949.826
Chgb	0.232242	0.360338	0.36	0.345	2223.49
Atp2a2	0.00123401	0.358757	0.816	0.664	16.8195
Rtl8a	0.000809956	0.357042	0.86	0.827	11.0591
Sft2d3	0.0036834	0.356757	0.167	0.045	49.8806
Srsf5	0.0919462	0.355185	0.605	0.609	1075.77
Ndufc1	0.124516	0.354071	0.246	0.182	1405.04
Kmt2b	0.0169897	0.352544	0.105	0.027	223.466
Scg2	0.0389452	0.352036	0.754	0.682	495.539
Tmem240	0.0302706	0.351435	0.149	0.064	389.31
Stag1	0.0259839	0.351389	0.167	0.073	337.193
Epha4	0.121467	0.350725	0.386	0.327	1374.65
Pak2	0.00668407	0.349805	0.14	0.036	89.7804
Tusc3	0.0799549	0.348036	0.342	0.255	955.381
Tmem106b	0.0342751	0.347512	0.535	0.491	438.653
Fkbp2	0.0642659	0.346792	0.5	0.482	786.808
Slitrk2	0.356245	0.343087	0.114	0.082	2283.53
Nomo1	0.100598	0.342704	0.272	0.191	1164.82
Apbb2	0.442678	0.341641	0.132	0.109	2459.07
Inpp1	0.0370007	0.340396	0.193	0.1	471.611
Cherp	0.0863138	0.338802	0.14	0.073	1023.42
Fam135a	0.0311078	0.338764	0.184	0.091	399.611
Prlr	0.105723	0.338672	0.351	0.273	1217.82
Lmbrd2	0.0719969	0.338604	0.333	0.236	873.539
Nr1d2	0.0212735	0.338378	0.158	0.064	278.427
Ankrd49	0.04464	0.337737	0.114	0.045	562.152
Fam104a	0.0227874	0.337062	0.219	0.109	296.942
Kdm6a	0.0105095	0.336822	0.132	0.036	140.165
Abcg4	0.08362	0.336727	0.202	0.127	994.241
Cers2	0.168799	0.336263	0.193	0.136	1738.29
Slc35f1	0.166704	0.334902	0.272	0.218	1725.22
Limk2	0.0311078	0.334547	0.184	0.091	399.58
2310033P09Rik	0.0131528	0.333408	0.158	0.055	174.603
Slc25a36	0.0386918	0.332148	0.368	0.264	492.469
R3hdm1	0.016973	0.331752	0.596	0.518	223.263
Grik2	0.37759	0.33134	0.272	0.255	2354.65
Pnisr	0.000972411	0.330975	0.798	0.709	13.2637
Tmc4	0.0711083	0.330717	0.167	0.091	863.468
Sst	0.579483	0.329831	0.018	0.009	2460.49
Ufc1	0.0904115	0.329624	0.167	0.1	1060.62
Inha	0.175098	0.328337	0.132	0.082	1783.55
Pgrmc1	0.000923659	0.327146	0.921	0.873	12.6015
Snrnp200	0.0597797	0.327106	0.096	0.036	736.008
Nnat	0.160246	0.326542	0.465	0.436	1702.29
Gpbp1l1	0.0218384	0.325634	0.132	0.045	285.559
Rad9b	0.152688	0.325311	0.114	0.064	1634.07
Nktr	0.0236408	0.325138	0.658	0.627	307.733
Arxes2	0.041102	0.324776	0.491	0.4	519.611
Ncl	0.161039	0.324725	0.193	0.136	1709.91
Tenm1	0.0671285	0.32456	0.57	0.509	818.968
N4bp2	0.0407944	0.324499	0.193	0.1	518.212
AW551984	0.292252	0.323539	0.228	0.191	2610.1
Mrpl42	0.0870952	0.323531	0.202	0.127	1031.47
Mrps26	0.1101	0.321097	0.351	0.282	1260.2
Insig1	0.103767	0.321013	0.395	0.318	1197.58
Efnb3	0.0731373	0.320634	0.526	0.445	886.497
Tmem183a	0.141703	0.3202	0.211	0.155	1571.06
Cox7b	0.16338	0.319575	0.272	0.218	1729.54
Map7d1	0.219472	0.319136	0.219	0.173	2129.75
Man1a	0.0503638	0.318579	0.088	0.027	627.986
Txndc17	0.0578823	0.318276	0.219	0.136	713.747
Rfx7	0.0636494	0.317517	0.202	0.118	779.896
Tmbim1	0.0651339	0.316984	0.096	0.036	796.718
Sulf2	0.226011	0.316153	0.175	0.127	2178.75
Plpbp	0.131131	0.31596	0.184	0.118	1471.82
Arglu1	0.0181529	0.315659	0.64	0.582	238.511
Rpl22l1	0.00821663	0.315602	0.763	0.727	110.07
Idh3g	0.154063	0.315543	0.289	0.236	1646.93
Morn2	0.0226463	0.314568	0.114	0.036	295.149
Lingo3	0.0321034	0.314247	0.096	0.027	411.919
Gm45184	0.0110177	0.314052	0.096	0.018	146.821
C230004F18Rik	0.0516635	0.312838	0.482	0.427	641.764
Twf1	0.09812	0.312672	0.088	0.036	1139.17
Cacna2d3	0.189181	0.312175	0.175	0.118	1889.54
Slf1	0.278056	0.312164	0.272	0.236	2518.07
AC149090.1	0.0166413	0.312093	0.763	0.736	219.033
Rmst	0.0828629	0.312001	0.518	0.455	986.814
Tmem63b	0.0350157	0.311941	0.395	0.318	447.676
Npy2r	0.250328	0.311204	0.237	0.191	2341.07
Dgkq	0.0256827	0.311135	0.237	0.127	333.361
Sdf2	0.176733	0.311121	0.298	0.255	1796.67
Lin37	0.0603388	0.308987	0.123	0.055	742.288
Gm48855	0.0212826	0.308467	0.184	0.082	278.504
Cbx3	0.492136	0.308016	0.263	0.255	2526.63
Rpa3	0.0775235	0.307809	0.079	0.027	928.421
AI504432	0.313858	0.306908	0.368	0.345	2407.92
Kctd20	0.0957182	0.306482	0.123	0.064	1113.59
Ube3a	1.14642e-05	0.306274	0.991	0.991	0.157221
Gm16105	0.0750697	0.305578	0.167	0.091	907.893
Psmc2	0.0115084	0.305544	0.096	0.018	153.246
Nova1	0.281711	0.305377	0.193	0.164	2542.44
Nell1	0.278535	0.304871	0.228	0.191	2521.57
Numbl	0.0108583	0.304864	0.096	0.018	144.741
Grm5	0.00445263	0.304737	0.746	0.618	60.2084
Dhx15	0.0345723	0.304036	0.219	0.118	442.318
Tspoap1	0.0911818	0.303825	0.325	0.245	1068.92
Taf4	0.0323776	0.303776	0.079	0.018	415.274
Tmem107	0.169066	0.303755	0.132	0.082	1740.2
Cbx1	0.211414	0.30154	0.219	0.164	2066.36
Pdia3	0.140427	0.301421	0.36	0.318	1559.16
Gm21887	0.0644437	0.301271	0.096	0.036	788.791
Srsf9	0.0813741	0.299896	0.246	0.173	970.955
Hmgb1	0.334448	0.299888	0.184	0.155	2210.37
Rprm	0.0990119	0.299738	0.123	0.064	1148.14
Asap2	0.0603388	0.299675	0.123	0.055	742.227
Rab8a	0.150684	0.29947	0.105	0.055	1656.32
Slc39a7	0.209845	0.299291	0.167	0.118	2053.75
Lrp12	0.119731	0.299213	0.184	0.118	1356.43
Stk19	0.119664	0.298866	0.132	0.073	1355.91
Pank4	0.032901	0.297378	0.096	0.027	421.823
Luc7l3	0.0263976	0.296604	0.561	0.473	342.324
Cd200	0.111703	0.29598	0.667	0.618	1275.98
Desi2	0.245732	0.295799	0.123	0.082	2311.11
Slc35e4	0.0932273	0.295671	0.088	0.036	1087.68
Shisa9	0.0877356	0.294503	0.307	0.218	1038.61
Tmem243	0.0829817	0.294134	0.43	0.382	988.146
Tmem255a	0.169731	0.294041	0.614	0.609	1737.88
C130026L21Rik	0.0048143	0.293852	0.07	0	65.0123
Dner	0.0112476	0.293684	0.675	0.582	149.852
Ids	0.151378	0.293006	0.474	0.445	1622.16
Gm15261	0.145775	0.292693	0.105	0.055	1608.91
Hdac3	0.0960924	0.292587	0.289	0.218	1117.36
Nhp2	0.0468784	0.292412	0.088	0.027	588.84
Wdr89	0.0701869	0.292026	0.158	0.082	853.263
Chpt1	0.144227	0.291795	0.237	0.164	1595.01
Dbn1	0.0193288	0.291772	0.377	0.236	253.594
Afdn	0.193218	0.29171	0.193	0.145	1918.65
Zscan26	0.358114	0.29152	0.307	0.282	2287.63
Slc12a5	0.00801352	0.291202	0.868	0.855	107.413
Manea	0.25111	0.290757	0.219	0.173	2346.62
Gfra2	0.182645	0.290013	0.219	0.155	1843.61
Tm9sf2	0.176872	0.28989	0.43	0.391	1797.73
Tmem229a	0.0290768	0.289136	0.096	0.027	374.712
Mrps21	0.139052	0.28906	0.202	0.136	1548.06
Myo9a	0.11625	0.289043	0.211	0.145	1321.53
Pcbp2	0.139092	0.288954	0.377	0.309	1548.37
Entpd5	0.150309	0.28865	0.114	0.064	1653.55
Atp6v1h	0.263142	0.288399	0.246	0.2	2431.17
Calr	0.0140429	0.288298	0.693	0.627	186.04
Trap1	0.0342015	0.287616	0.079	0.018	437.745
Rdx	0.0998489	0.287212	0.123	0.064	1156.65
Fam133b	0.162133	0.286036	0.289	0.227	1717.31
Gck	0.0509863	0.285977	0.14	0.064	634.423
Pdia4	0.0694638	0.285738	0.167	0.091	845.305
Mfap3	0.195035	0.285709	0.149	0.1	1933
Snapc3	0.284567	0.285302	0.158	0.118	2560.25
Nop10	0.142505	0.285234	0.325	0.291	1578.81
Mfsd6	0.178907	0.284837	0.404	0.364	1811.97
Nfrkb	0.15231	0.284649	0.149	0.091	1630.47
Ythdc1	0.0569432	0.284622	0.228	0.136	703.078
Nbeal2	0.0830017	0.284353	0.079	0.027	988.301
Pdia6	0.332677	0.283887	0.333	0.309	2207.65
Psmd13	0.0564674	0.283656	0.114	0.045	697.486
Micu3	0.21421	0.282489	0.333	0.282	2088.34
C1qtnf4	0.489467	0.282111	0.14	0.118	2523.2
Serinc3	0.182918	0.281979	0.386	0.355	1846.19
Pld3	0.0679297	0.281643	0.526	0.473	828.198
Prkag1	0.117814	0.281479	0.132	0.073	1336.83
Myo18a	0.362827	0.280849	0.158	0.127	2303.23
Lrrn3	0.0549169	0.280802	0.316	0.218	679.597
Lysmd4	0.154004	0.280555	0.211	0.145	1646.46
Qk	0.0653504	0.280529	0.149	0.073	798.974
Scap	0.0575574	0.280405	0.219	0.127	710.086
Gpr137	0.0722222	0.279878	0.167	0.091	875.983
Gpm6a	0.0002349	0.279632	0.982	0.945	3.21554
Col4a1	0.0117823	0.27942	0.079	0.009	156.835
Lhx8	0.0550839	0.279334	0.211	0.118	681.553
Atp13a1	0.049614	0.278524	0.158	0.073	619.332
Fbxo38	0.0216532	0.278466	0.088	0.018	283.18
Chadl	0.0748969	0.278311	0.079	0.027	906.177
Slc8a3	0.339833	0.278072	0.114	0.082	2224.89
Gpr83	0.229592	0.277873	0.105	0.064	2204.54
Rnf114	0.121777	0.277771	0.096	0.045	1378.03
Gm32618	0.0545947	0.277742	0.07	0.018	675.774
Utp11	0.347621	0.27766	0.123	0.091	2252.58
Med21	0.138213	0.277522	0.149	0.091	1539.56
2310035C23Rik	0.189859	0.277378	0.298	0.236	1895.55
Lgi1	0.306112	0.276554	0.281	0.245	2644.81
Cops9	0.113985	0.276303	0.439	0.382	1298.63
Hs6st2	0.139575	0.276119	0.482	0.436	1550.54
Psen1	0.324441	0.275984	0.175	0.145	2463.48
Map2k1	0.361042	0.275921	0.158	0.127	2296.23
Tdrd5	0.00851966	0.275631	0.061	0	114.07
Ak2	0.0277191	0.275139	0.158	0.064	358.464
Samd8	0.169787	0.275098	0.342	0.291	1738.28
Gm15446	0.16311	0.275001	0.158	0.1	1726.85
Gnb2	0.177964	0.27488	0.289	0.227	1804.38
Hs6st1	0.0991227	0.274769	0.088	0.036	1149.13
Ddx5	0.424753	0.273801	0.535	0.6	2443.18
Ldhb	0.0852281	0.2735	0.184	0.109	1011.66
Tmem33	0.0658246	0.273408	0.395	0.309	804.575
Mcts1	0.181289	0.272333	0.132	0.082	1832.11
Prnp	0.00113045	0.272091	0.886	0.809	15.4103
2610524H06Rik	0.230068	0.272064	0.193	0.145	2207.04
Taz	0.0548002	0.271916	0.456	0.364	678.262
Abcb7	0.0655266	0.271626	0.193	0.109	801.062
Amn	0.0679558	0.271157	0.096	0.036	828.449
Pcp4	0.0769052	0.270865	0.684	0.645	928.63
Dpm2	0.390581	0.270427	0.281	0.255	2369.65
Inafm1	0.136478	0.269893	0.316	0.245	1522.83
Dbpht2	0.255948	0.269795	0.14	0.1	2384.67
Gsdme	0.297804	0.269293	0.149	0.109	2633.48
Ssr3	0.075521	0.268628	0.465	0.373	912.898
Aig1	0.418033	0.268439	0.36	0.373	2434.21
Rb1cc1	0.341781	0.267593	0.325	0.309	2231.15
CT025619.1	0.40755	0.267376	0.325	0.318	2401.29
Hprt	0.348211	0.267334	0.246	0.218	2252.58
Lemd3	0.0771454	0.266873	0.175	0.1	931.454
Sept6	0.153888	0.266707	0.114	0.064	1645.53
Dpm3	0.17011	0.266408	0.298	0.236	1740.73
Nol4	0.0285588	0.266345	0.114	0.036	368.638
Ccdc59	0.0599548	0.265694	0.14	0.064	737.803
Zfyve19	0.111037	0.265381	0.096	0.045	1269.49
Luzp2	0.285177	0.265146	0.202	0.155	2563.17
Amy1	0.18957	0.264857	0.237	0.173	1893.23
Hspa5	0.331611	0.264792	0.518	0.573	2203.22
Nfkb1	0.169709	0.264562	0.088	0.045	1738.16
Prkaa1	0.0480169	0.263896	0.088	0.027	602.036
Baz2b	0.368556	0.263654	0.14	0.109	2323.01
Paxbp1	0.173857	0.26311	0.219	0.155	1772.12
Fsd1	0.224002	0.263062	0.193	0.145	2164.08
Mrpl55	0.109207	0.262874	0.149	0.082	1251.95
Usp19	0.13082	0.262349	0.14	0.082	1468.85
Bmp3	0.184991	0.26216	0.088	0.045	1858.79
Oscp1	0.198879	0.262153	0.14	0.091	1963.34
Tacc2	0.649766	0.26169	0.175	0.173	2210.5
Nlgn3	0.268123	0.261561	0.57	0.555	2463.51
Cldnd1	0.301554	0.260901	0.307	0.273	2642.82
Becn1	0.106754	0.260815	0.123	0.064	1228.09
Smim1	0.035146	0.260757	0.079	0.018	449.201
Rgs9	0.0491786	0.260515	0.088	0.027	614.143
Comt	0.0551873	0.260244	0.404	0.336	682.722
Tspyl5	0.122894	0.260238	0.096	0.045	1389.07
Cetn3	0.260323	0.2602	0.263	0.218	2412.41
Cd164	0.232342	0.260166	0.263	0.218	2224.21
Mrpl3	0.186358	0.260146	0.132	0.082	1869.54
Rbbp4	0.117035	0.260086	0.219	0.145	1329.4
Rasgrf1	0.0334412	0.259951	0.509	0.409	428.415
Rwdd2a	0.0308816	0.259725	0.14	0.055	396.829
Mmaa	0.0191432	0.259452	0.07	0.009	251.216
Grk6	0.121777	0.259259	0.096	0.045	1377.9
Ttc4	0.11296	0.259259	0.307	0.218	1288.31
Atp6ap2	0.0995539	0.259161	0.553	0.536	1153.63
Ssb	0.194393	0.258574	0.219	0.164	1928.57
Tmem246	0.182946	0.258351	0.333	0.273	1846.29
Pabpc4	0.273019	0.258273	0.079	0.045	2489.38
Zcchc3	0.142174	0.257706	0.105	0.055	1575.57
Zfp160	0.0788452	0.256608	0.14	0.073	942.91
Rock1	0.073648	0.256362	0.193	0.109	892.098
Car8	0.0151158	0.256283	0.053	0	199.725
Mphosph8	0.424699	0.255764	0.175	0.145	2443.29
Rbmxl1	0.0337375	0.255198	0.079	0.018	432.076
Smc6	0.866456	0.254885	0.237	0.264	1450.45
Erc1	0.686915	0.254859	0.158	0.155	2099.9
Cadm1	0.00979782	0.25482	0.851	0.736	130.821
Acsl5	0.345652	0.254189	0.123	0.091	2243.97
Nacad	0.188931	0.253799	0.132	0.082	1887.61
Ier3ip1	0.0691591	0.253616	0.509	0.427	841.873
Ift22	0.117387	0.253141	0.096	0.045	1332.7
Pam16	0.116943	0.25244	0.228	0.155	1328.6
Hapln4	0.142852	0.252055	0.298	0.227	1581.51
Lsm3	0.145866	0.251901	0.14	0.082	1609.78
Cep89	0.16394	0.251606	0.079	0.036	1734.81
B3galt2	0.159187	0.251268	0.228	0.164	1693.11
Glmn	0.125284	0.251148	0.167	0.1	1412.95
Serinc1	0.0064525	0.251076	0.921	0.927	86.6829
Abi1	0.247574	0.250776	0.132	0.091	2321.74
Meis2	0.0985893	0.250618	0.061	0.018	1143.73
Cacna1b	0.724649	0.250402	0.351	0.4	1964.52
Tmem167	0.426783	0.250126	0.219	0.191	2445.47
Cd81	0.101571	0.249312	0.57	0.564	1174.97
Mettl7a1	0.0108524	0.248993	0.079	0.009	144.674
Nsa2	0.479845	0.248805	0.167	0.145	2513.91
Pcmtd2	0.328142	0.248656	0.228	0.191	2458.11
Siah1a	0.00851966	0.248435	0.061	0	114.061
Rpl10-ps3	0.193003	0.248328	0.088	0.045	1918.26
Arpc5l	0.235019	0.247758	0.246	0.191	2243.25
Sgcb	0.434555	0.247635	0.202	0.173	2453.5
AW549877	0.466881	0.247425	0.132	0.109	2490.34
Gabpb1	0.0048143	0.247237	0.07	0	65.0075
Mmd2	0.134709	0.247134	0.14	0.082	1506.05
Tmem184c	0.0458635	0.246832	0.158	0.073	576.963
Gm14703	0.0679558	0.246776	0.096	0.036	828.381
Auts2	0.551625	0.246455	0.333	0.336	2447.01
Ppp4r2	0.168599	0.246072	0.149	0.091	1736.91
Ppp4r3a	0.0920966	0.245796	0.14	0.073	1077.44
Pcdh20	0.617513	0.245568	0.114	0.1	2319.38
Xpc	0.0503638	0.245446	0.088	0.027	627.936
Zfp410	0.310128	0.24514	0.096	0.064	2669.28
Slc16a11	0.149769	0.245129	0.386	0.327	1648.06
Tubgcp4	0.103482	0.244895	0.114	0.055	1194.71
Fabp3	0.240995	0.244724	0.114	0.073	2275.71
P4htm	0.269356	0.244581	0.219	0.173	2467.57
Ssna1	0.181411	0.24421	0.175	0.118	1832.98
Smim26	0.388986	0.244186	0.281	0.264	2373.98
Tmem216	0.181856	0.244107	0.088	0.045	1836.56
Cux1	0.342167	0.244048	0.175	0.145	2230.59
C1galt1c1	0.23291	0.243852	0.114	0.073	2227.32
Armcx3	0.431866	0.243668	0.263	0.255	2449.11
Cntn1	0.0270296	0.243211	0.807	0.782	349.953
Itih3	0.0151158	0.243175	0.053	0	199.71
Sdc2	0.269142	0.243084	0.36	0.318	2469.11
Gpr101	0.249504	0.242928	0.289	0.227	2335.36
Tmem132a	0.150231	0.242912	0.149	0.091	1652.99
Ndufa7	0.767988	0.242714	0.263	0.273	1804.77
Usp9x	0.198309	0.241916	0.465	0.455	1958.5
AI593442	0.454355	0.241648	0.351	0.345	2474.42
Kif21a	0.478286	0.241636	0.237	0.218	2510.52
Klhl7	0.150543	0.241585	0.272	0.209	1654.92
Slc1a6	0.330279	0.241359	0.105	0.073	2465.53
Gm26724	0.314588	0.241243	0.298	0.255	2412.57
Timm50	0.10218	0.24124	0.088	0.036	1180.79
Tmem70	0.316629	0.240885	0.158	0.118	2421.9
Prkag2	0.201326	0.240833	0.096	0.055	1982.25
Tmem141	0.308447	0.240763	0.088	0.055	2659.12
Ccdc82	0.505243	0.240388	0.237	0.227	2534.3
Gtf3a	0.0204229	0.240187	0.07	0.009	267.541
Uqcrq	0.114161	0.240186	0.368	0.3	1300.41
Cdh2	0.0621812	0.240084	0.535	0.527	763.025
Ppwd1	0.245939	0.239948	0.114	0.073	2312.81
Cox7c	0.13428	0.239605	0.596	0.582	1501.65
Med28	0.247897	0.23889	0.211	0.164	2323.29
Tmem14a	0.24954	0.238806	0.158	0.109	2335.45
Ppt2	0.233339	0.238683	0.07	0.036	2229.79
Tmem158	0.538139	0.238629	0.298	0.291	2555.62
Zfp414	0.208225	0.238424	0.211	0.155	2041.02
Tial1	0.135662	0.237964	0.509	0.482	1516.02
Insr	0.346062	0.23779	0.14	0.109	2246.29
Hjurp	0.577475	0.237648	0.184	0.164	2462.93
Insig2	0.201405	0.237183	0.412	0.382	1982.23
Zfp560	0.347116	0.237094	0.105	0.073	2250.36
Tmeff1	0.541296	0.236913	0.263	0.264	2560.33
Arhgap39	0.104318	0.236812	0.158	0.091	1203.41
Foxred2	0.460807	0.236182	0.123	0.1	2480.06
Islr2	0.472353	0.236161	0.123	0.1	2500.16
Pim3	0.194636	0.236028	0.088	0.045	1930.4
Kcnk9	0.757659	0.235762	0.281	0.355	1846.42
Fam76b	0.120668	0.235216	0.096	0.045	1366.44
Uqcc2	0.430546	0.23517	0.263	0.245	2448.94
Rpl12	0.414274	0.234899	0.377	0.345	2423.5
Dnlz	0.199527	0.234791	0.175	0.118	1968.34
Asah1	0.413068	0.234762	0.219	0.2	2422.64
Atp1b1	0.00315477	0.234689	0.982	0.945	42.7787
Egfem1	0.0622591	0.234037	0.053	0.009	763.857
Psd	0.52716	0.233883	0.272	0.264	2553.03
Gpat4	0.578237	0.233731	0.228	0.218	2464.45
Igfbp5	0.375294	0.233431	0.114	0.082	2347.84
Srsf7	0.157039	0.233383	0.36	0.291	1673.56
Gabra4	0.126318	0.233371	0.132	0.073	1423.23
Ly6h	0.0328867	0.233338	0.868	0.882	421.707
Rgs11	0.428728	0.233157	0.158	0.127	2442.03
Cpt1c	0.390973	0.233049	0.228	0.2	2370.08
Slc35a5	0.110561	0.232928	0.167	0.1	1265.03
Csrnp3	0.177546	0.232915	0.228	0.164	1801.21
Gm42851	0.339738	0.232583	0.228	0.191	2226.3
Rap1gap	0.307072	0.232345	0.237	0.209	2650.65
Dock6	0.153417	0.232337	0.079	0.036	1640.94
March6	0.0592795	0.232226	0.649	0.636	730.265
Slc25a17	0.173159	0.232164	0.167	0.109	1766.4
Trim24	0.0193181	0.231921	0.105	0.027	253.473
Rftn1	0.37449	0.231835	0.07	0.045	2346.18
Clk1	0.127819	0.231818	0.5	0.482	1438.22
Sdf2l1	0.156996	0.231798	0.105	0.055	1673.27
L3mbtl3	0.05756	0.231792	0.07	0.018	710.06
Nek1	0.496408	0.231699	0.132	0.109	2530.19
Dus3l	0.143024	0.231428	0.246	0.173	1583.28
Abhd16a	0.487722	0.231236	0.263	0.245	2522.99
Zfp938	0.142174	0.231231	0.105	0.055	1575.43
Cartpt	0.827991	0.230929	0.105	0.1	1554.97
Dkk3	0.25604	0.23089	0.114	0.073	2385.01
Chrd	0.034671	0.230538	0.079	0.018	443.546
Bicd1	0.0262403	0.230347	0.509	0.391	340.389
Lrrc8a	0.637912	0.229871	0.333	0.345	2240.99
Zcchc8	0.217624	0.229262	0.096	0.055	2114.87
Mib2	0.359759	0.229236	0.132	0.1	2292.02
Lmnb2	0.430563	0.229131	0.088	0.064	2448.18
Zfp62	0.035146	0.229003	0.079	0.018	449.166
Slc5a3	0.420192	0.228978	0.272	0.245	2435.01
Reep1	0.0409667	0.228817	0.553	0.491	517.983
Dync1i2	0.3397	0.228593	0.386	0.364	2227.07
Xylt2	0.602246	0.228472	0.096	0.082	2329.49
Arxes1	0.355075	0.228321	0.298	0.273	2280.29
Jmy	0.0784155	0.22807	0.079	0.027	938.006
Ptpn5	0.171618	0.227762	0.412	0.373	1753.76
Mastl	0.0961415	0.227618	0.061	0.018	1117.84
Mgat2	0.35974	0.22755	0.193	0.164	2292.26
Morc3	0.120714	0.2274	0.123	0.064	1366.84
Gprasp2	0.0295708	0.227363	0.632	0.518	380.753
Rimklb	0.832679	0.227341	0.158	0.164	1536.29
Lekr1	0.344644	0.226729	0.167	0.127	2240.87
Snrpb2	0.266618	0.226578	0.079	0.045	2452.62
Ptprn	0.257047	0.226557	0.772	0.736	2392.08
Selenok	0.1038	0.226524	0.632	0.582	1197.85
Ttc39c	0.130573	0.226442	0.07	0.027	1466.59
Nus1	0.451565	0.226361	0.307	0.309	2473.22
Fzd3	0.429157	0.22635	0.263	0.236	2444.05
Galt	0.20066	0.22537	0.167	0.109	1977.9
Ccm2	0.0851986	0.225327	0.132	0.064	1011.39
Mob1b	0.273857	0.225252	0.123	0.082	2493.19
Car11	0.582112	0.22514	0.228	0.218	2400.05
Wdr37	0.379513	0.22483	0.193	0.164	2357.16
Dpy30	0.106373	0.224737	0.088	0.036	1224.35
Acvr1b	0.283748	0.224697	0.36	0.336	2554.3
Astn1	0.370026	0.224662	0.518	0.536	2325.61
Abhd12	0.592716	0.224455	0.43	0.482	2368.49
Hnrnpu	0.229465	0.224295	0.553	0.564	2203.78
Tmem267	0.121408	0.224177	0.158	0.091	1374.22
Alg13	0.0151158	0.224164	0.053	0	199.695
Qsox2	0.107152	0.22389	0.114	0.055	1232.03
Mfsd14b	0.469998	0.223871	0.184	0.164	2494.75
Tmem135	0.493911	0.223778	0.158	0.136	2528.33
Tmem248	0.872579	0.223755	0.272	0.3	1436.27
Cct7	0.238226	0.223423	0.167	0.118	2259.58
Zfp950	0.393606	0.223168	0.342	0.327	2379.74
Smpdl3a	0.0151158	0.222535	0.053	0	199.68
Zpr1	0.10852	0.222168	0.088	0.036	1244.94
Glul	0.451785	0.22202	0.105	0.082	2473.98
Snrpd2	0.178155	0.22194	0.175	0.118	1805.78
Fgfr3	0.0269496	0.221907	0.044	0	349.267
Npbwr1	0.359131	0.221879	0.061	0.036	2290.9
Mtmr7	0.132122	0.221717	0.096	0.045	1481.88
Epdr1	0.429877	0.221558	0.351	0.345	2446.86
6030458C11Rik	0.602726	0.221072	0.132	0.118	2330.14
Tspan6	0.202191	0.220513	0.132	0.082	1989.36
Sars	0.918986	0.220204	0.228	0.273	1351.83
Pik3r2	0.0925614	0.220078	0.061	0.018	1082.23
Kif3a	0.687767	0.220069	0.289	0.3	2100.44
Npy1r	0.073333	0.21959	0.123	0.055	888.576
Arhgef11	0.00851966	0.219457	0.061	0	114.053
Ptpn12	0.199746	0.219327	0.096	0.055	1970.1
Pcdh19	0.069674	0.219189	0.518	0.418	847.654
Chchd1	0.204922	0.218946	0.132	0.082	2014.18
Zbtb37	0.0757642	0.217967	0.079	0.027	915.686
mt-Nd6	0.185081	0.217892	0.132	0.082	1859.32
Gps2	0.271473	0.217883	0.132	0.091	2480.99
Prkci	0.0568064	0.217689	0.07	0.018	701.446
1810022K09Rik	0.169977	0.217589	0.246	0.182	1739.54
Tmtc4	0.0835332	0.217315	0.167	0.091	994.212
Csnk2a2	0.375922	0.217229	0.123	0.091	2350.64
Tra2b	0.26212	0.217003	0.465	0.427	2423.56
Lrrtm4	0.187896	0.216982	0.184	0.127	1879.33
Tmem259	0.486141	0.216953	0.14	0.118	2520.15
Ahi1	0.140604	0.216647	0.693	0.691	1560.84
Scn9a	0.275324	0.216643	0.412	0.382	2498.84
Anks1	0.0269496	0.216558	0.044	0	349.24
Actl6b	0.174599	0.216542	0.211	0.145	1778.81
Akt1s1	0.364634	0.216429	0.114	0.082	2309.96
Gde1	0.584202	0.216212	0.368	0.391	2396.98
Kif9	0.196705	0.216207	0.061	0.027	1945.8
Pcdh7	0.908709	0.216202	0.342	0.391	1369.42
Fbn2	0.0484553	0.216164	0.035	0	607.145
Psme1	0.0361126	0.21602	0.079	0.018	460.905
Grid1	0.443742	0.215487	0.228	0.2	2460.99
Idh2	0.208104	0.215441	0.14	0.091	2040.46
Pigf	0.0583219	0.215282	0.07	0.018	718.992
Zfp428	0.422725	0.214715	0.088	0.064	2444.62
Cd47	0.0608761	0.214604	0.754	0.764	748.289
Ndufa13	0.0527106	0.214473	0.842	0.791	653.454
Sdhaf2	0.435835	0.214355	0.088	0.064	2457.67
Ube2w	0.771869	0.214345	0.123	0.118	1778.39
Tagap1	0.216624	0.214331	0.105	0.064	2107.1
Yipf5	0.329657	0.213984	0.272	0.245	2464.19
Vcpip1	0.265365	0.213894	0.123	0.082	2445.08
Fbxw11	0.156369	0.213641	0.079	0.036	1667.99
Gtpbp6	0.13094	0.213542	0.096	0.045	1469.93
Tmem164	0.37999	0.213485	0.07	0.045	2355.56
Thoc2	0.351405	0.213338	0.316	0.3	2268.32
Spats1	0.0594336	0.213221	0.053	0.009	732.103
Retreg1	0.544133	0.213141	0.263	0.255	2561.78
Spcs3	0.392664	0.212963	0.184	0.155	2375.62
Lhfpl3	0.468063	0.21234	0.228	0.209	2494.31
Gatd1	0.459009	0.21211	0.096	0.073	2481.41
Edil3	0.240326	0.212039	0.526	0.509	2276.13
Jak2	0.0359436	0.211836	0.061	0.009	458.892
Rpap1	0.196705	0.2117	0.061	0.027	1945.61
Wdr83	0.207735	0.211665	0.096	0.055	2037.88
Scn2a	0.22523	0.211644	0.833	0.818	2172.12
Sdad1	0.284937	0.211315	0.088	0.055	2562.15
Trmt112	0.273647	0.210957	0.167	0.118	2491.83
Pex5	0.331446	0.210932	0.096	0.064	2211.74
Selenom	0.0721645	0.210828	0.553	0.491	875.355
Adck2	0.0477897	0.210751	0.105	0.036	599.426
Ift43	0.157241	0.210735	0.053	0.018	1675.4
Srrt	0.810101	0.210711	0.158	0.164	1620.2
Rgmb	0.378903	0.210594	0.237	0.209	2354.51
Vbp1	0.143914	0.210485	0.246	0.182	1591.69
Cdk5rap3	0.0891369	0.210421	0.105	0.045	1047.98
Gjd2	0.273019	0.210363	0.079	0.045	2489.11
Acp6	0.0925614	0.210343	0.061	0.018	1082.13
Irf2bp2	0.174191	0.210247	0.088	0.045	1775.18
Atp5g3	0.72851	0.210178	0.184	0.182	1954.59
Birc2	0.133729	0.209942	0.14	0.082	1497.09
Adipor1	0.519733	0.209594	0.193	0.173	2540.46
Rpl22	0.491373	0.20958	0.219	0.2	2525.17
Cdk11b	0.151931	0.209557	0.105	0.055	1627.48
Pkd1	0.390906	0.209461	0.333	0.318	2370.06
P2ry14	0.266618	0.209425	0.079	0.045	2452.36
Mapk1	0.638324	0.209368	0.202	0.2	2237.96
Dzip3	0.413783	0.209291	0.474	0.5	2424.77
Fig4	0.0217767	0.209053	0.07	0.009	284.774
Senp7	0.267555	0.209008	0.193	0.145	2459.37
Pclo	0.357608	0.208948	0.395	0.391	2287.26
Med13l	0.63783	0.208544	0.158	0.145	2241.33
Gpr37l1	0.0151158	0.208543	0.053	0	199.665
Banf1	0.184991	0.208398	0.088	0.045	1858.6
Gm1673	0.139162	0.20823	0.746	0.755	1548.87
Thoc3	0.127793	0.207882	0.07	0.027	1438.18
Pdcd5	0.323271	0.207429	0.193	0.155	2456.86
Cacna1e	0.839432	0.207121	0.36	0.409	1515.17
Zfp946	0.0961415	0.207066	0.061	0.018	1117.74
Cnst	0.425317	0.206875	0.079	0.055	2445.58
Tmem59	0.291018	0.20672	0.465	0.464	2601.41
Zfp821	0.460014	0.206651	0.088	0.064	2484.08
Bola2	0.648513	0.206565	0.193	0.182	2214.67
AL589692.1	0.0365146	0.206461	0.061	0.009	465.708
Gm26518	0.358331	0.206373	0.114	0.082	2286.87
Sigmar1	0.214322	0.206287	0.184	0.127	2088.35
Patj	0.0937427	0.206265	0.061	0.018	1093.13
Slc37a4	0.237511	0.206237	0.07	0.036	2258.25
C2cd2	0.106373	0.206176	0.088	0.036	1224.24
Resp18	0.12647	0.206152	0.623	0.545	1424.69
Anxa7	0.517266	0.206145	0.149	0.127	2536.67
Eml1	0.0353803	0.206115	0.061	0.009	452.018
Brd9	0.993327	0.206026	0.219	0.245	136.086
Asrgl1	0.359131	0.205956	0.061	0.036	2290.54
Ift46	0.60942	0.205939	0.114	0.1	2330.42
Lamtor1	0.455903	0.205756	0.202	0.182	2477.37
Ppp2r3c	0.060658	0.205623	0.07	0.018	745.729
Rabep2	0.127793	0.205565	0.07	0.027	1438.06
Chl1	0.164274	0.205136	0.544	0.491	1737.52
Gpt	0.0151158	0.204938	0.053	0	199.65
Fbxo17	0.0484553	0.204889	0.035	0	607.097
Dis3l	0.0598708	0.20481	0.07	0.018	736.89
Amt	0.583645	0.204683	0.07	0.055	2401.7
Slc25a22	0.52395	0.204622	0.158	0.136	2549.02
Creld2	0.0484553	0.204573	0.035	0	607.048
Tmie	0.487997	0.204534	0.167	0.145	2520.02
Hyou1	0.260302	0.204508	0.184	0.136	2413.26
Zim1	0.670284	0.204274	0.167	0.155	2183.12
Ube2l3	0.123523	0.204256	0.211	0.136	1395.44
Il1rapl1	0.180557	0.204228	0.211	0.145	1826.16
Fam19a1	0.132022	0.204072	0.219	0.145	1481.15
Fbxl6	0.297118	0.204039	0.158	0.118	2628.01
Npffr1	0.0937427	0.203827	0.061	0.018	1093.04
Lpin1	0.17145	0.203761	0.114	0.064	1752.56
Hmg20a	0.307756	0.203448	0.149	0.109	2655.01
Cd83	0.236387	0.20344	0.333	0.282	2248.99
Col19a1	0.0484553	0.203306	0.035	0	607
Nvl	0.97573	0.202803	0.202	0.218	924.016
Shkbp1	0.150684	0.202526	0.105	0.055	1656.17
Mrpl20	0.383958	0.202285	0.114	0.082	2365.95
Zdhhc20	0.0427415	0.201678	0.588	0.464	539.398
Gm49179	0.184927	0.201662	0.035	0.009	1863.33
Usp33	0.551638	0.201643	0.272	0.264	2446.52
1810037I17Rik	0.353077	0.201591	0.211	0.173	2273.81
5330417C22Rik	0.259474	0.201372	0.193	0.145	2406.1
Snx17	0.198879	0.201326	0.14	0.091	1963.14
Negr1	0.138641	0.201086	0.711	0.673	1544.04
B4gat1	0.175499	0.201069	0.325	0.255	1786.93
6720427I07Rik	0.357912	0.200769	0.105	0.073	2288.49
Upf3b	0.751395	0.200746	0.202	0.2	1865.71
Ylpm1	0.531419	0.20071	0.246	0.218	2560.91
Grin2b	0.0480864	0.200693	0.711	0.591	602.859
Sfr1	0.542009	0.200534	0.149	0.127	2562.62
Ap2s1	0.50183	0.200455	0.149	0.127	2536.75
Cep192	0.41696	0.199999	0.158	0.127	2431.3
Ivns1abp	0.254337	0.199847	0.114	0.073	2372.71
Agpat5	0.211844	0.199809	0.193	0.136	2069.92
Smpd3	0.456636	0.199766	0.184	0.155	2477.25
Ddr1	0.193003	0.199517	0.088	0.045	1918.07
Scn1a	0.259435	0.199505	0.447	0.418	2406.26
Hrh3	0.318292	0.199229	0.158	0.118	2430.8
Galnt16	0.528403	0.199211	0.491	0.518	2554.83
Adcy2	0.354852	0.199185	0.237	0.2	2279.22
Prr14l	0.129177	0.199138	0.07	0.027	1452.21
Borcs8	0.430866	0.199129	0.079	0.055	2447.32
Tmem198	0.399626	0.198879	0.07	0.045	2382.97
Gpc3	0.453848	0.198806	0.096	0.073	2475.29
Ap5z1	0.270874	0.198584	0.079	0.045	2477.95
Rbm3	0.124076	0.198575	0.307	0.245	1400.57
Brinp3	0.192327	0.198332	0.412	0.345	1913.84
Zfp646	0.484434	0.198327	0.044	0.027	2518.57
Baalc	0.63819	0.198274	0.132	0.118	2238.13
Xpa	0.0868251	0.198054	0.079	0.027	1028.88
Cep164	0.49727	0.198021	0.184	0.164	2529.12
Gm9803	0.0985893	0.197967	0.061	0.018	1143.64
Zfp462	0.616318	0.197697	0.211	0.2	2326.6
Rnf5	0.165487	0.197554	0.079	0.036	1745.06
Ubqln2	0.516511	0.19755	0.14	0.118	2540.72
Utrn	0.560994	0.196674	0.061	0.045	2452.66
Saraf	0.269423	0.196617	0.57	0.6	2467.91
Ugcg	0.270292	0.196569	0.325	0.282	2474.79
Tax1bp1	0.464303	0.196273	0.184	0.155	2491.45
Gabpa	0.155367	0.196193	0.053	0.018	1659.32
Vps28	0.418602	0.196128	0.289	0.255	2436.68
Grin3a	0.377131	0.196082	0.333	0.3	2354.81
Tbc1d19	0.232918	0.195974	0.105	0.064	2226.7
Ints4	0.0594336	0.195871	0.053	0.009	732.044
Snrpf	0.2858	0.195825	0.219	0.173	2567.63
Rilpl2	0.155367	0.195822	0.053	0.018	1659.16
Tm2d1	0.361473	0.195695	0.377	0.355	2297.89
Angptl6	0.243867	0.195525	0.07	0.036	2296.25
Cenpf	0.0884093	0.195512	0.026	0	1045.97
Rev3l	0.158308	0.195346	0.228	0.164	1684.71
Ring1	0.61466	0.195118	0.316	0.318	2325.26
Nsun6	0.200731	0.195115	0.061	0.027	1978.41
Dnajb9	0.149183	0.194824	0.316	0.236	1642.06
Klhl28	0.130573	0.194811	0.07	0.027	1466.46
Sh3bp5l	0.433194	0.194691	0.088	0.064	2450.15
Suco	0.507211	0.194686	0.184	0.164	2533.52
Asic4	0.482637	0.194628	0.096	0.073	2517.92
Lrch2	0.360424	0.194498	0.114	0.082	2294.82
Tpst1	0.312813	0.194494	0.149	0.109	2685.5
Limk1	0.622935	0.194415	0.114	0.1	2307.35
Nrg3	0.355565	0.194212	0.123	0.091	2281.66
Grik4	0.952521	0.194164	0.105	0.109	1242.09
Anp32b	0.185533	0.194029	0.123	0.073	1862.38
Ube2g1	0.357569	0.193983	0.123	0.091	2287.72
Nudt18	0.585726	0.193763	0.079	0.064	2397.96
mt-Atp8	0.710023	0.193755	0.316	0.327	2032.09
Scg5	0.304571	0.193596	0.465	0.473	2662.56
Adgrl2	0.3316	0.19357	0.175	0.136	2203.48
Pus7	0.107442	0.19352	0.088	0.036	1234.83
Myadm	0.237511	0.193499	0.07	0.036	2258.02
Os9	0.411416	0.193492	0.228	0.191	2415.83
Hnrnpa1	0.758102	0.193325	0.254	0.264	1843.7
Taf12	0.0603634	0.193301	0.053	0.009	742.47
Orc4	0.334861	0.19325	0.175	0.136	2211.42
Clcn3	0.230897	0.19322	0.667	0.709	2213.84
Maf1	0.176635	0.193034	0.149	0.091	1796.02
Grhpr	0.246012	0.193028	0.07	0.036	2313.25
Gm14827	0.1882	0.192957	0.123	0.073	1881.81
Synj2bp	0.555485	0.192866	0.263	0.264	2449.69
Mrps33	0.484287	0.192803	0.105	0.082	2518.29
Znhit6	0.127443	0.192704	0.096	0.045	1434.5
Stk39	0.224402	0.192549	0.096	0.055	2167.73
1110038F14Rik	0.250063	0.192516	0.105	0.064	2339.09
Hsbp1l1	0.0269496	0.192425	0.044	0	349.213
Nars	0.83514	0.192157	0.149	0.155	1528.31
Mrps17	0.26051	0.191938	0.211	0.164	2411.8
Paip1	0.307756	0.191758	0.149	0.109	2654.7
Sema6c	0.284846	0.191684	0.132	0.091	2561.62
Ddx18	0.496408	0.191358	0.132	0.109	2529.69
Fam13b	0.0594336	0.191289	0.053	0.009	731.984
Kcnip4	0.762373	0.191124	0.237	0.245	1821.31
Atp5o.1	0.617428	0.191062	0.202	0.191	2320.3
Spock1	0.885832	0.191011	0.57	0.591	1404.93
Cfdp1	0.476676	0.190988	0.105	0.082	2506.36
Ulk2	0.764245	0.19091	0.114	0.109	1810.5
Rmdn1	0.241735	0.19066	0.07	0.036	2281.01
Ppig	0.443317	0.190647	0.316	0.291	2460.85
Prr7	0.51195	0.190195	0.14	0.118	2539.79
Spry2	0.198711	0.189954	0.061	0.027	1962.07
Slc52a2	0.476454	0.189868	0.044	0.027	2509.48
Snx7	0.0269496	0.189855	0.044	0	349.186
Fus	0.2594	0.189758	0.772	0.818	2406.19
Slc39a10	0.313091	0.189723	0.412	0.418	2402.66
Mpped1	0.349259	0.189698	0.105	0.073	2257.61
Caprin2	0.457291	0.189645	0.088	0.064	2475.32
Tmed8	0.471638	0.189544	0.105	0.082	2499.21
Spon1	0.169111	0.189506	0.14	0.082	1740.49
Hace1	0.625424	0.189478	0.132	0.118	2305.94
Cep170	0.597619	0.189455	0.14	0.127	2336.09
Map4k4	0.586998	0.18944	0.123	0.109	2363.84
Wfs1	0.289604	0.189317	0.123	0.082	2593.41
Dlg5	0.16394	0.189269	0.079	0.036	1734.65
Ociad1	0.213884	0.18912	0.596	0.609	2085.79
Tmem175	0.465487	0.189101	0.088	0.064	2487.56
mt-Nd3	0.0151984	0.188851	0.93	0.945	200.619
Canx	0.0206627	0.188776	0.895	0.855	270.599
Rab9	0.30997	0.188654	0.053	0.027	2670.39
Alg1	0.24831	0.188621	0.105	0.064	2325.42
Mettl17	0.487997	0.188619	0.167	0.145	2519.53
Gria2	0.0142811	0.188451	0.956	0.955	189.096
Gm26909	0.211061	0.188353	0.061	0.027	2064.18
Ddo	0.104764	0.18835	0.044	0.009	1208.24
Hnrnpr	0.151766	0.188322	0.456	0.409	1626.02
Ntn1	0.211061	0.188316	0.061	0.027	2063.96
Llgl1	0.155367	0.188178	0.053	0.018	1659.01
Slc17a5	0.165487	0.188127	0.079	0.036	1744.89
Calb1	0.272313	0.188031	0.228	0.173	2484.86
Map3k3	0.0269496	0.187979	0.044	0	349.159
Manf	0.292327	0.187692	0.289	0.245	2610.48
Naaa	0.472517	0.187579	0.114	0.091	2497.72
Hist3h2ba	0.217205	0.187442	0.211	0.155	2111.67
Lamtor4	0.27912	0.18743	0.36	0.327	2525.2
Sbsn	0.965105	0.187355	0.079	0.082	1100.22
N4bp2l2	0.728108	0.187223	0.289	0.309	1954.24
3110021N24Rik	0.819978	0.187095	0.254	0.273	1582.56
Dirc2	0.438125	0.186869	0.202	0.173	2453.5
Atcay	0.336039	0.186621	0.351	0.327	2216.85
Tom1l2	0.865533	0.186547	0.158	0.164	1454.09
Als2	0.260373	0.186447	0.044	0.018	2412.36
Nkap	0.0884093	0.186427	0.026	0	1045.88
Hipk3	0.0570359	0.186217	0.114	0.045	704.108
Vldlr	0.616802	0.186191	0.219	0.218	2325.96
Ddx41	0.315076	0.186188	0.088	0.055	2416
Wasl	0.535665	0.186136	0.193	0.182	2567.44
Sbk1	0.235419	0.186064	0.07	0.036	2241.66
Rfx1	0.234594	0.186005	0.105	0.064	2240.14
Nectin1	0.48116	0.185979	0.246	0.227	2514.06
Xlr3a	0.104764	0.185803	0.044	0.009	1208.13
Gm16794	0.200731	0.185787	0.061	0.027	1978.21
Tnpo1	0.471359	0.185677	0.132	0.109	2498.2
Tbpl1	0.593376	0.18556	0.114	0.1	2369.35
March7	0.293959	0.185523	0.307	0.255	2615.06
Mcmbp	0.355736	0.185503	0.105	0.073	2282.05
Rpp21	0.495096	0.18546	0.211	0.191	2525.98
Med14	0.243102	0.185423	0.105	0.064	2291.48
0610010F05Rik	0.761764	0.185316	0.079	0.073	1826.71
Tmem28	0.0342761	0.185294	0.061	0.009	438.632
Rapgef3	0.208965	0.184919	0.061	0.027	2047.44
Pnpt1	0.16751	0.184891	0.105	0.055	1727.03
Snx13	0.428151	0.184862	0.211	0.182	2440.46
Tjp1	0.550359	0.184832	0.07	0.055	2516.24
Extl3	0.460354	0.184577	0.175	0.155	2484.07
Dimt1	0.143679	0.184476	0.132	0.073	1589.37
[truncated: 12,930 more rows]

## Sheet: P50FvsP50M_Vgat4
	p_val	avg_logFC	pct.1	pct.2	p_val_adjust
[truncated: 14,588 more rows]

[truncated: 31 more sheets: P50FvsP50M_Vgat5, P50FvsP50M_Vgat6, P50FvsP50M_Vgat7, P50FvsP50M_Vgat8, P50FvsP50M_Vgat9, P50FvsP50M_Vgat10, P50FvsP50M_Vgat11, P50FvsP50M_Vgat12, P50FvsP50M_Vgat13, P50FvsP50M_Vgat14, P50FvsP50M_Vgat15, P50FvsP50M_Vgat16, P50FvsP50M_Vgat17, P50FvsP50M_Vgat18, P50FvsP50M_Vgat19, P50FvsP50M_Vgat20, P50FvsP50M_Vglut_1, P50FvsP50M_Vglut_2, P50FvsP50M_Vglut_3, P50FvsP50M_Vglut_4 …]
