# Supplementary material for: Esr1-dependent signaling and transcriptional maturation in the medial preoptic area of the hypothalamus shape the development of mating behavior during adolescence
Source: eLife. 2026 Jun 19;14:RP106347. doi: 10.7554/eLife.106347 (PMC13282117; doi:10.7554/eLife.106347)
Supplement: Supplementary file 12. [file elife-106347-supp12.xlsx]

## Sheet: Sheet1
Oligonucleotides	SOURCE	IDENTIFIER
RNAscope® Probe- Mm-Slc32a1	ACDBio	Cat#319191-C1
RNAscope® Probe- Mm-eGFP	ACDBio	Cat#400281-C3
RNAscope® Probe- Mm-Slc17a6	ACDBio	Cat#319171-C2
HCR probe-Pdzrn4	Molecular Instruments	N/A
HCR probe-Creb3l1	Molecular Instruments	N/A
HCR probe-Sccphd	Molecular Instruments	N/A
HCR probe-Esr1	Molecular Instruments	N/A
HCR probe-Socs2	Molecular Instruments	N/A
HCR probe-Pgr	Molecular Instruments	N/A
HCR probe-Tmem35a	Molecular Instruments	N/A
HCR probe-Nts	Molecular Instruments	N/A
HCR probe-SLc32a1	Molecular Instruments	N/A
HCR probe-AR	Molecular Instruments	N/A
HCR probe-Alcam	Molecular Instruments	N/A
HCR probe-Pou6f2	Molecular Instruments	N/A
HCR probe-Greb1	Molecular Instruments	N/A
HCR probe-Acvr1c	Molecular Instruments	N/A
HCR probe-Sytl4	Molecular Instruments	N/A
HCR probe-Nrip1	Molecular Instruments	N/A
HCR probe-Lamp5	Molecular Instruments	N/A
HCR probe-Apoc3	Molecular Instruments	N/A
HCR probe-Pgr	Molecular Instruments	N/A
HCR probe-SLc32a1	Molecular Instruments	N/A
HCR probe-Esr1	Molecular Instruments	N/A
HCR probe-Pgr15l	Molecular Instruments	N/A
HCR probe-Npy2r	Molecular Instruments	N/A
HCR probe-AR	Molecular Instruments	N/A
